# Supplementary material for: Various Approaches to Studying the Phase Transition in an Octamethylcyclotetrasiloxane Crystal: From X-ray Structural Analysis to Metadynamics
Source: MDPI journal article supplement (doi:10.3390/ijms23169073), 2022-08-13
Supplement: s1 [file s1]

# Electronic supporting information (ESI) for article: Various Approaches to Studying the Phase Transition in an Octamethylcyclotetrasiloxane Crystal: from X-Ray Structural Analysis to Metadynamics

Alexander D. Volodin<sup>1,2,\*</sup>, Alexander F. Smol'yakov<sup>1,3</sup>, Alexander A. Korlyukov<sup>1,2</sup>

<sup>1</sup> A. N. Nesmeyanov Institute of Organoelement Compounds, Russian Academy of Science, Vavilova str. 28, 119991, Moscow, Russian Federation;

<sup>2</sup> D. Mendeleev University of Chemical Technology of Russia, Miusskaya sq. 9, 125047, Moscow, Russian Federation;

<sup>3</sup> Plekhanov Russian University of Economics, Stremyanny per. 36, 117997, Moscow, Russian Federation;

\* Correspondence: alex.d.volodin@gmail.com;

**Keywords:** *in situ* cryo-crystallization; X-ray structure determination; periodic DFT calculations; quantum chemical calculations; Born-Oppenheimer molecular dynamics; metadynamics; phase transition path; free energy of phase transition.

**Table S1.** Crystallographic data of octamethylcyclotetrasiloxane at different temperatures.

| Temperature/K                               | 100                | 150                | 200                | 210                | 221                | 230                | 240                | 250                | 270                |
|---------------------------------------------|--------------------|--------------------|--------------------|--------------------|--------------------|--------------------|--------------------|--------------------|--------------------|
| Crystal system                              | tetragonal         |
| Space group                                 | P4 <sub>2</sub> /n | I4 <sub>1</sub> /a | I4 <sub>1</sub> /a | I4 <sub>1</sub> /a |
| a/Å                                         | 15.9596(16)        | 15.9938(15)        | 16.0373(19)        | 16.051(2)          | 16.0690(19)        | 16.083(3)          | 16.0850(16)        | 16.0850(16)        | 16.250(7)          |
| b/Å                                         | 15.9596(16)        | 15.9938(15)        | 16.0373(19)        | 16.051(2)          | 16.0690(19)        | 16.083(3)          | 16.0850(16)        | 16.0850(16)        | 16.250(7)          |
| c/Å                                         | 6.3737(15)         | 6.4099(14)         | 6.4481(17)         | 6.4589(18)         | 6.4719(17)         | 6.517(3)           | 6.8911(9)          | 6.8911(9)          | 6.943(4)           |
| $\alpha$ /°                                 | 90                 | 90                 | 90                 | 90                 | 90                 | 90                 | 90                 | 90                 | 90                 |
| $\beta$ /°                                  | 90                 | 90                 | 90                 | 90                 | 90                 | 90                 | 90                 | 90                 | 90                 |
| $\gamma$ /°                                 | 90                 | 90                 | 90                 | 90                 | 90                 | 90                 | 90                 | 90                 | 90                 |
| Volume/Å <sup>3</sup>                       | 1623.4(5)          | 1639.7(5)          | 1658.4(6)          | 1664.0(6)          | 1671.1(6)          | 1685.7(10)         | 1782.9(4)          | 1782.9(4)          | 1833.3(19)         |
| Z                                           | 4                  | 4                  | 4                  | 4                  | 4                  | 4                  | 4                  | 4                  | 4                  |
| $\rho_{\text{calc}}/\text{cm}^{-3}$         | 1.214              | 1.202              | 1.188              | 1.184              | 1.179              | 1.169              | 1.105              | 1.105              | 1.075              |
| $\mu/\text{mm}^{-1}$                        | 0.364              | 0.360              | 0.356              | 0.355              | 0.354              | 0.350              | 0.331              | 0.331              | 0.322              |
| 2 $\Theta$ range for data collection/°      | 3.61 to 61.564     | 3.602 to 61.25     | 3.592 to 61.196    | 3.588 to 61.288    | 3.584 to 61.316    | 3.582 to 61.18     | 5.064 to 61.428    | 5.064 to 61.536    | 5.014 to 51.988    |
| Reflections collected                       | 5755               | 10212              | 10231              | 10350              | 10524              | 9559               | 6271               | 6282               | 2110               |
| R <sub>int</sub>                            | 0.0313             | 0.0444             | 0.0522             | 0.0548             | 0.0520             | 0.0734             | 0.0398             | 0.0382             | 0.0471             |
| Data/restraints/parameters                  | 2160/0/77          | 2511/0/77          | 2530/0/77          | 2557/0/77          | 2572/0/77          | 2557/0/77          | 1376/0/39          | 1381/0/39          | 886/0/39           |
| Goodness-of-fit on F <sup>2</sup>           | 1.072              | 1.034              | 1.032              | 1.042              | 1.001              | 1.066              | 1.090              | 1.087              | 1.043              |
| R <sub>1</sub> [I > 2 $\sigma$ (I)]         | 0.0477             | 0.0472             | 0.0572             | 0.0611             | 0.0598             | 0.0883             | 0.0545             | 0.0560             | 0.0907             |
| wR <sub>2</sub> [all data]                  | 0.1220             | 0.1295             | 0.1553             | 0.1596             | 0.1599             | 0.2423             | 0.1724             | 0.1906             | 0.2999             |
| Largest diff. peak/hole / e Å <sup>-3</sup> | 0.43/-0.26         | 0.36/-0.24         | 0.44/-0.22         | 0.42/-0.26         | 0.42/-0.25         | 0.51/-0.34         | 0.39/-0.28         | 0.45/-0.30         | 0.72/-0.41         |

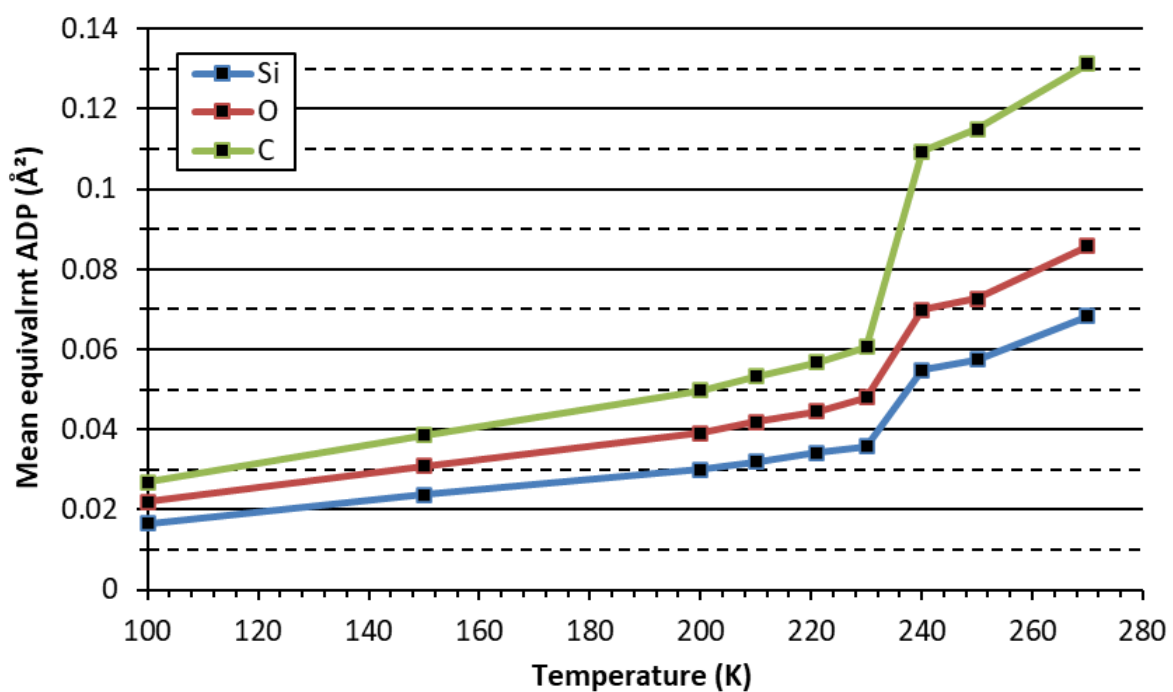

**Figure S1.** Isotropic atom displacement parameters ( $U_{eq}$ ) averaged by atom type.
