# Supplementary material for: Various Approaches to Studying the Phase Transition in an Octamethylcyclotetrasiloxane Crystal: From X-ray Structural Analysis to Metadynamics
Source: Int J Mol Sci. 2022 Aug 13;23(16):9073. doi: 10.3390/ijms23169073 (PMC9408834; doi:10.3390/ijms23169073)
Supplement: Supplementary file 1 [file ijms-23-09073-s001.zip]

Archive with 19 entries (19 files):
- 1-11_100_1.cif
- 1-11_100_1_cifreport.pdf
- 1-11_150.cif
- 1-11_150_cifreport.pdf
- 1-11_200.cif
- 1-11_200_cifreport.pdf
- 1-11_210.cif
- 1-11_210_cifreport.pdf
- 1-11_221.cif
- 1-11_221_cifreport.pdf
- 1-11_240.cif
- 1-11_240_cifreport.pdf
- 1-11_250.cif
- 1-11_250_cifreport.pdf
- 1-11_270.cif
- 1-11_270_cifreport.pdf
- 230.cif
- 230_cifreport.pdf
- ESI.pdf
