# Supplementary material for: Various Approaches to Studying the Phase Transition in an Octamethylcyclotetrasiloxane Crystal: From X-ray Structural Analysis to Metadynamics
Source: Int J Mol Sci. 2022 Aug 13;23(16):9073. doi: 10.3390/ijms23169073 (PMC9408834; doi:10.3390/ijms23169073)
Supplement: Supplementary file 1 [file ijms-23-09073-s001.zip › 1-11_100_1.cif]

data_100
_audit_creation_date               2021-12-01
_audit_creation_method
;
Olex2 1.5
(compiled 2021.11.18 svn.ra9532c28 for OlexSys, GUI svn.r6429)
;
_shelxl_version_number             2014/6
_audit_contact_author_address      ?
_audit_contact_author_email        ?
_audit_contact_author_name         ''
_audit_contact_author_phone        ?
_publ_contact_author_id_orcid      ?
_publ_section_references
;
Dolomanov, O.V., Bourhis, L.J., Gildea, R.J, Howard, J.A.K. & Puschmann, H.
 (2009), J. Appl. Cryst. 42, 339-341.

Sheldrick, G.M. (2015). Acta Cryst. A71, 3-8.

Sheldrick, G.M. (2015). Acta Cryst. C71, 3-8.
;
_chemical_name_common              ?
_chemical_name_systematic          ?
_chemical_formula_moiety           'C8 H24 O4 Si4'
_chemical_formula_sum              'C8 H24 O4 Si4'
_chemical_formula_weight           296.63
_chemical_melting_point            ?
loop_
  _atom_type_symbol
  _atom_type_description
  _atom_type_scat_dispersion_real
  _atom_type_scat_dispersion_imag
  _atom_type_scat_source
 'C' 'C' 0.0033 0.0016 'International Tables Vol C Tables 4.2.6.8 and 6.1.1.4'
 'H' 'H' 0.0000 0.0000 'International Tables Vol C Tables 4.2.6.8 and 6.1.1.4'
 'O' 'O' 0.0106 0.0060 'International Tables Vol C Tables 4.2.6.8 and 6.1.1.4'
 'Si' 'Si' 0.0817 0.0704 'International Tables Vol C Tables 4.2.6.8 and 6.1.1.4'

_shelx_space_group_comment
;
The symmetry employed for this shelxl refinement is uniquely defined
by the following loop, which should always be used as a source of
symmetry information in preference to the above space-group names.
They are only intended as comments.
;
_space_group_crystal_system        'tetragonal'
_space_group_IT_number             86
_space_group_name_H-M_alt          'P 42/n'
_space_group_name_Hall             '-P 4bc'
loop_
  _space_group_symop_operation_xyz
 'x, y, z'
 '-x+1/2, -y+1/2, z'
 '-y, x+1/2, z+1/2'
 'y+1/2, -x, z+1/2'
 '-x, -y, -z'
 'x-1/2, y-1/2, -z'
 'y, -x-1/2, -z-1/2'
 '-y-1/2, x, -z-1/2'

_cell_length_a                     15.9596(16)
_cell_length_b                     15.9596(16)
_cell_length_c                     6.3737(15)
_cell_angle_alpha                  90
_cell_angle_beta                   90
_cell_angle_gamma                  90
_cell_volume                       1623.4(5)
_cell_formula_units_Z              4
_cell_measurement_reflns_used      1390
_cell_measurement_temperature      100
_cell_measurement_theta_max        23.326
_cell_measurement_theta_min        3.021
_shelx_estimated_absorpt_T_max     0.899
_shelx_estimated_absorpt_T_min     0.839
_exptl_absorpt_coefficient_mu      0.364
_exptl_absorpt_correction_T_max    0.7453
_exptl_absorpt_correction_T_min    0.4175
_exptl_absorpt_correction_type     psi-scan
_exptl_absorpt_process_details    
 'SADABS-2014/5 (Bruker,2014/5) was used for absorption correction. wR2(int) was 0.1540 before and 0.0798 after correction. The Ratio of minimum to maximum transmission is 0.5602. The \l/2 correction factor is 0.00150.'
_exptl_absorpt_special_details     ?
_exptl_crystal_colour              colourless
_exptl_crystal_colour_primary      colourless
_exptl_crystal_density_diffrn      1.214
_exptl_crystal_density_meas        .
_exptl_crystal_density_method      ?
_exptl_crystal_description         irregular
_exptl_crystal_F_000               640
_exptl_crystal_recrystallization_method  'in situ, 0.3 mm capiillary'
_exptl_crystal_size_max            0.5
_exptl_crystal_size_mid            0.3
_exptl_crystal_size_min            0.3
_exptl_transmission_factor_max     ?
_exptl_transmission_factor_min     ?
_diffrn_reflns_av_R_equivalents    0.0313
_diffrn_reflns_av_unetI/netI       0.0578
_diffrn_reflns_Laue_measured_fraction_full  0.906
_diffrn_reflns_Laue_measured_fraction_max  0.848
_diffrn_reflns_limit_h_max         22
_diffrn_reflns_limit_h_min         -16
_diffrn_reflns_limit_k_max         19
_diffrn_reflns_limit_k_min         -18
_diffrn_reflns_limit_l_max         8
_diffrn_reflns_limit_l_min         -4
_diffrn_reflns_number              5755
_diffrn_reflns_point_group_measured_fraction_full  0.906
_diffrn_reflns_point_group_measured_fraction_max  0.848
_diffrn_reflns_theta_full          25.242
_diffrn_reflns_theta_max           30.782
_diffrn_reflns_theta_min           1.805
_diffrn_ambient_temperature        100.00
_diffrn_detector_area_resol_mean   8
_diffrn_detector_type              'Bruker SMART CCD 1K area detector'
_diffrn_measured_fraction_theta_full  0.906
_diffrn_measured_fraction_theta_max  0.848
_diffrn_measurement_device         'three-circle diffractometer'
_diffrn_measurement_device_type    'Bruker APEX-II CCD'
_diffrn_measurement_method         '\w and \f scans'
_diffrn_radiation_monochromator    graphite
_diffrn_radiation_type             MoK\a
_diffrn_radiation_wavelength       0.71073
_diffrn_source                     'sealed tube'
_reflns_Friedel_coverage           0.000
_reflns_Friedel_fraction_full      .
_reflns_Friedel_fraction_max       .
_reflns_number_gt                  1390
_reflns_number_total               2160
_reflns_special_details
;
 Reflections were merged by SHELXL according to the crystal
 class for the calculation of statistics and refinement.
 
 _reflns_Friedel_fraction is defined as the number of unique
 Friedel pairs measured divided by the number that would be
 possible theoretically, ignoring centric projections and
 systematic absences.
;
_reflns_threshold_expression       'I > 2\s(I)'
_computing_cell_refinement         'SAINT v8.34A (Bruker, 2013)'
_computing_data_collection         ?
_computing_data_reduction          'SAINT v8.34A (Bruker, 2013)'
_computing_molecular_graphics      'Olex2 1.5 (Dolomanov et al., 2009)'
_computing_publication_material    'Olex2 1.5 (Dolomanov et al., 2009)'
_computing_structure_refinement    'SHELXL 2014/6 (Sheldrick, 2015)'
_computing_structure_solution      'SHELXT 2014/4 (Sheldrick, 2014)'
_refine_diff_density_max           0.434
_refine_diff_density_min           -0.257
_refine_diff_density_rms           0.071
_refine_ls_extinction_coef         .
_refine_ls_extinction_method       none
_refine_ls_goodness_of_fit_ref     1.072
_refine_ls_hydrogen_treatment      constr
_refine_ls_matrix_type             full
_refine_ls_number_parameters       77
_refine_ls_number_reflns           2160
_refine_ls_number_restraints       0
_refine_ls_R_factor_all            0.0810
_refine_ls_R_factor_gt             0.0477
_refine_ls_restrained_S_all        1.072
_refine_ls_shift/su_max            0.001
_refine_ls_shift/su_mean           0.000
_refine_ls_structure_factor_coef   Fsqd
_refine_ls_weighting_details      
 'w=1/[\s^2^(Fo^2^)+(0.0466P)^2^+0.4904P] where P=(Fo^2^+2Fc^2^)/3'
_refine_ls_weighting_scheme        calc
_refine_ls_wR_factor_gt            0.1114
_refine_ls_wR_factor_ref           0.1220
_refine_special_details            ?
_olex2_refinement_description
;
1. Fixed Uiso
 At 1.5 times of:
  All C(H,H,H) groups
2.a Idealised Me refined as rotating group:
 C1(H1A,H1B,H1C), C2(H2A,H2B,H2C), C4(H4A,H4B,H4C), C3(H3A,H3B,H3C)
;
_atom_sites_solution_hydrogens     geom
_atom_sites_solution_primary       dual
_atom_sites_solution_secondary     ?
loop_
  _atom_site_label
  _atom_site_type_symbol
  _atom_site_fract_x
  _atom_site_fract_y
  _atom_site_fract_z
  _atom_site_U_iso_or_equiv
  _atom_site_adp_type
  _atom_site_occupancy
  _atom_site_site_symmetry_order
  _atom_site_calc_flag
  _atom_site_refinement_flags_posn
  _atom_site_refinement_flags_adp
  _atom_site_refinement_flags_occupancy
  _atom_site_disorder_assembly
  _atom_site_disorder_group
 Si1 Si 0.43105(4) 0.88568(4) 0.48730(11) 0.01626(19) Uani 1 1 d . . . . .
 Si2 Si 0.61223(4) 0.93424(4) 0.35608(11) 0.01687(18) Uani 1 1 d . . . . .
 O1 O 0.38765(9) 0.97791(9) 0.5133(3) 0.0215(4) Uani 1 1 d . . . . .
 O2 O 0.51757(9) 0.89555(9) 0.3525(3) 0.0220(4) Uani 1 1 d . . . . .
 C1 C 0.35852(13) 0.81879(14) 0.3336(4) 0.0228(6) Uani 1 1 d . . . . .
 H1A H 0.3085 0.8067 0.4175 0.034 Uiso 1 1 calc R U . . .
 H1B H 0.3866 0.7662 0.2971 0.034 Uiso 1 1 calc R U . . .
 H1C H 0.3421 0.8482 0.2049 0.034 Uiso 1 1 calc R U . . .
 C2 C 0.45466(15) 0.84165(14) 0.7500(4) 0.0256(6) Uani 1 1 d . . . . .
 H2A H 0.4937 0.8788 0.8238 0.038 Uiso 1 1 calc R U . . .
 H2B H 0.4801 0.7861 0.7341 0.038 Uiso 1 1 calc R U . . .
 H2C H 0.4027 0.8368 0.8310 0.038 Uiso 1 1 calc R U . . .
 C4 C 0.68446(15) 0.86123(14) 0.4901(5) 0.0302(7) Uani 1 1 d . . . . .
 H4A H 0.7405 0.8862 0.4968 0.045 Uiso 1 1 calc R U . . .
 H4B H 0.6870 0.8084 0.4119 0.045 Uiso 1 1 calc R U . . .
 H4C H 0.6642 0.8504 0.6326 0.045 Uiso 1 1 calc R U . . .
 C3 C 0.64507(15) 0.95251(15) 0.0805(4) 0.0286(6) Uani 1 1 d . . . . .
 H3A H 0.6070 0.9929 0.0148 0.043 Uiso 1 1 calc R U . . .
 H3B H 0.6432 0.8995 0.0029 0.043 Uiso 1 1 calc R U . . .
 H3C H 0.7023 0.9747 0.0784 0.043 Uiso 1 1 calc R U . . .

loop_
  _atom_site_aniso_label
  _atom_site_aniso_U_11
  _atom_site_aniso_U_22
  _atom_site_aniso_U_33
  _atom_site_aniso_U_23
  _atom_site_aniso_U_13
  _atom_site_aniso_U_12
 Si1 0.0142(3) 0.0142(3) 0.0203(4) -0.0037(3) 0.0015(2) -0.0024(2)
 Si2 0.0139(3) 0.0152(3) 0.0216(4) -0.0039(3) 0.0028(3) -0.0008(2)
 O1 0.0207(8) 0.0169(8) 0.0268(13) -0.0060(7) 0.0005(7) 0.0007(6)
 O2 0.0150(8) 0.0243(8) 0.0267(12) -0.0066(7) 0.0046(7) -0.0042(6)
 C1 0.0183(11) 0.0200(12) 0.0302(18) -0.0050(10) -0.0016(10) -0.0030(9)
 C2 0.0284(13) 0.0248(13) 0.0234(18) -0.0003(10) -0.0011(11) 0.0002(10)
 C4 0.0275(14) 0.0263(14) 0.037(2) -0.0100(11) -0.0035(12) 0.0095(11)
 C3 0.0312(14) 0.0315(14) 0.0231(18) -0.0043(12) 0.0101(11) -0.0089(11)

_geom_special_details
;
 All esds (except the esd in the dihedral angle between two l.s. planes)
 are estimated using the full covariance matrix.  The cell esds are taken
 into account individually in the estimation of esds in distances, angles
 and torsion angles; correlations between esds in cell parameters are only
 used when they are defined by crystal symmetry.  An approximate (isotropic)
 treatment of cell esds is used for estimating esds involving l.s. planes.
;
loop_
  _geom_bond_atom_site_label_1
  _geom_bond_atom_site_label_2
  _geom_bond_distance
  _geom_bond_site_symmetry_2
  _geom_bond_publ_flag
 Si1 O1 1.6352(16) . ?
 Si1 O2 1.6339(17) . ?
 Si1 C1 1.855(2) . ?
 Si1 C2 1.855(3) . ?
 Si2 O1 1.6305(16) 5_676 ?
 Si2 O2 1.6322(15) . ?
 Si2 C4 1.848(2) . ?
 Si2 C3 1.856(3) . ?
 O1 Si2 1.6305(16) 5_676 ?
 C1 H1A 0.9800 . ?
 C1 H1B 0.9800 . ?
 C1 H1C 0.9800 . ?
 C2 H2A 0.9800 . ?
 C2 H2B 0.9800 . ?
 C2 H2C 0.9800 . ?
 C4 H4A 0.9800 . ?
 C4 H4B 0.9800 . ?
 C4 H4C 0.9800 . ?
 C3 H3A 0.9800 . ?
 C3 H3B 0.9800 . ?
 C3 H3C 0.9800 . ?

loop_
  _geom_angle_atom_site_label_1
  _geom_angle_atom_site_label_2
  _geom_angle_atom_site_label_3
  _geom_angle
  _geom_angle_site_symmetry_1
  _geom_angle_site_symmetry_3
  _geom_angle_publ_flag
 O1 Si1 C1 107.91(9) . . ?
 O1 Si1 C2 109.60(10) . . ?
 O2 Si1 O1 108.94(9) . . ?
 O2 Si1 C1 107.76(11) . . ?
 O2 Si1 C2 109.85(10) . . ?
 C1 Si1 C2 112.69(12) . . ?
 O1 Si2 O2 109.48(9) 5_676 . ?
 O1 Si2 C4 107.79(11) 5_676 . ?
 O1 Si2 C3 110.34(10) 5_676 . ?
 O2 Si2 C4 110.20(11) . . ?
 O2 Si2 C3 107.92(11) . . ?
 C4 Si2 C3 111.12(13) . . ?
 Si2 O1 Si1 145.63(11) 5_676 . ?
 Si2 O2 Si1 144.22(12) . . ?
 Si1 C1 H1A 109.5 . . ?
 Si1 C1 H1B 109.5 . . ?
 Si1 C1 H1C 109.5 . . ?
 H1A C1 H1B 109.5 . . ?
 H1A C1 H1C 109.5 . . ?
 H1B C1 H1C 109.5 . . ?
 Si1 C2 H2A 109.5 . . ?
 Si1 C2 H2B 109.5 . . ?
 Si1 C2 H2C 109.5 . . ?
 H2A C2 H2B 109.5 . . ?
 H2A C2 H2C 109.5 . . ?
 H2B C2 H2C 109.5 . . ?
 Si2 C4 H4A 109.5 . . ?
 Si2 C4 H4B 109.5 . . ?
 Si2 C4 H4C 109.5 . . ?
 H4A C4 H4B 109.5 . . ?
 H4A C4 H4C 109.5 . . ?
 H4B C4 H4C 109.5 . . ?
 Si2 C3 H3A 109.5 . . ?
 Si2 C3 H3B 109.5 . . ?
 Si2 C3 H3C 109.5 . . ?
 H3A C3 H3B 109.5 . . ?
 H3A C3 H3C 109.5 . . ?
 H3B C3 H3C 109.5 . . ?

loop_
  _geom_torsion_atom_site_label_1
  _geom_torsion_atom_site_label_2
  _geom_torsion_atom_site_label_3
  _geom_torsion_atom_site_label_4
  _geom_torsion
  _geom_torsion_site_symmetry_1
  _geom_torsion_site_symmetry_2
  _geom_torsion_site_symmetry_3
  _geom_torsion_site_symmetry_4
  _geom_torsion_publ_flag
 O1 Si1 O2 Si2 67.3(2) . . . . ?
 O1 Si2 O2 Si1 -34.3(2) 5_676 . . . ?
 O2 Si1 O1 Si2 -81.0(2) . . . 5_676 ?
 C1 Si1 O1 Si2 162.24(19) . . . 5_676 ?
 C1 Si1 O2 Si2 -175.86(18) . . . . ?
 C2 Si1 O1 Si2 39.2(2) . . . 5_676 ?
 C2 Si1 O2 Si2 -52.7(2) . . . . ?
 C4 Si2 O2 Si1 84.1(2) . . . . ?
 C3 Si2 O2 Si1 -154.45(18) . . . . ?

_shelx_res_file
;
TITL 100_a.res in P4(2)/n
REM Old TITL 100 in P4(2)/n
REM SHELXT solution in P4(2)/n
REM R1 0.114, Rweak 0.002, Alpha 0.021, Orientation as input
REM Formula found by SHELXT: C2 O Si
CELL 0.71073 15.9596 15.9596 6.3737 90 90 90
ZERR 4 0.0016 0.0016 0.0015 0 0 0
LATT 1
SYMM 0.5-X,0.5-Y,+Z
SYMM -Y,0.5+X,0.5+Z
SYMM 0.5+Y,-X,0.5+Z
SFAC C H O Si
UNIT 32 96 16 16

L.S. 9
PLAN  5
SIZE 0.3 0.3 0.5
TEMP -173.15
CONF
BOND $H
list 4
MORE -1
fmap 2
acta
OMIT 10 14 0
OMIT 4 7 2
OMIT 4 8 1
OMIT -2 3 4
REM <olex2.extras>
REM <HklSrc "%.\\100.hkl">
REM </olex2.extras>

WGHT    0.046600    0.490400
FVAR       0.44496
SI1   4    0.431046    0.885677    0.487302    11.00000    0.01422    0.01421 =
         0.02034   -0.00367    0.00146   -0.00240
SI2   4    0.612226    0.934237    0.356082    11.00000    0.01387    0.01518 =
         0.02156   -0.00386    0.00280   -0.00079
O1    3    0.387654    0.977909    0.513339    11.00000    0.02067    0.01689 =
         0.02680   -0.00603    0.00054    0.00071
O2    3    0.517566    0.895545    0.352500    11.00000    0.01505    0.02425 =
         0.02674   -0.00664    0.00460   -0.00419
C1    1    0.358521    0.818786    0.333574    11.00000    0.01834    0.01998 =
         0.03015   -0.00498   -0.00163   -0.00301
AFIX 137
H1A   2    0.308506    0.806699    0.417482    11.00000   -1.50000
H1B   2    0.386603    0.766159    0.297077    11.00000   -1.50000
H1C   2    0.342132    0.848152    0.204927    11.00000   -1.50000
AFIX   0
C2    1    0.454664    0.841648    0.750037    11.00000    0.02844    0.02478 =
         0.02344   -0.00032   -0.00106    0.00016
AFIX 137
H2A   2    0.493725    0.878761    0.823783    11.00000   -1.50000
H2B   2    0.480055    0.786100    0.734127    11.00000   -1.50000
H2C   2    0.402690    0.836818    0.831021    11.00000   -1.50000
AFIX   0
C4    1    0.684462    0.861226    0.490102    11.00000    0.02745    0.02628 =
         0.03674   -0.00999   -0.00351    0.00947
AFIX 137
H4A   2    0.740512    0.886163    0.496767    11.00000   -1.50000
H4B   2    0.687020    0.808407    0.411946    11.00000   -1.50000
H4C   2    0.664153    0.850396    0.632649    11.00000   -1.50000
AFIX   0
C3    1    0.645068    0.952511    0.080530    11.00000    0.03116    0.03154 =
         0.02305   -0.00427    0.01005   -0.00889
AFIX 137
H3A   2    0.607044    0.992946    0.014769    11.00000   -1.50000
H3B   2    0.643187    0.899532    0.002937    11.00000   -1.50000
H3C   2    0.702316    0.974704    0.078380    11.00000   -1.50000
AFIX   0
HKLF 4

REM  100_a.res in P4(2)/n
REM R1 =  0.0477 for    1390 Fo > 4sig(Fo)  and  0.0810 for all    2160 data
REM     77 parameters refined using      0 restraints

END

WGHT      0.0466      0.4904

REM Highest difference peak  0.434,  deepest hole -0.257,  1-sigma level  0.071
Q1    1   0.6184  0.9363  0.1902  11.00000  0.05    0.43
Q2    1   0.4019  0.9369  0.5261  11.00000  0.05    0.38
Q3    1   0.5103  0.8942  0.4891  11.00000  0.05    0.37
Q4    1   0.6056  0.9366  0.5382  11.00000  0.05    0.34
Q5    1   0.3992  0.8419  0.4339  11.00000  0.05    0.32
;
_shelx_res_checksum                20193
_shelx_hkl_file
;
   1   0   0   -2.40    0.30
   1   1   0    2.10    0.40
  -1   1   0    1.10    0.30
  -1  -1   0    1.70    0.50
  -1  -1   0    0.80    0.30
  -1   1   0    1.90    0.40
   2   1   0   -7.00    1.40
  -1   2   0   -6.00    1.30
   1  -2   0   -5.30    1.30
  -2  -1   0   -3.90    1.50
  -2  -1   0   -8.50    1.00
   2   0   0 3632.84  117.99
  -2   0   0 3349.47  114.19
  -2   0   0 3437.96  117.09
   0  -2   0 3462.95  114.79
   0   2   0 3714.73  115.79
   2   0   0 3496.65  114.19
   1   2   0   -0.10    1.00
  -1  -2   0    0.10    1.00
  -2  -2   0  158.48    7.00
   2   2   0  162.98    7.00
   2   2   0  161.78    6.10
   2  -2   0  164.08    6.50
  -2   2   0  165.18    6.50
   3   2   0   -0.70    1.00
   3   2   0   -0.80    0.60
  -3  -2   0   -0.60    1.00
   2  -3   0   -0.70    0.80
  -2   3   0   -1.10    0.70
   1  -3   0    1.50    1.10
  -3  -1   0    1.70    1.20
   3   1   0    2.80    0.90
  -1   3   0    2.20    1.10
   3   1   0    1.70    1.20
   3   0   0   -0.10    0.40
   0   3   0    0.00    0.70
   3   0   0    0.00    0.60
   0  -3   0    0.30    0.70
  -3   0   0    0.20    0.60
  -1  -3   0   -0.10    0.80
  -3   1   0   -0.20    0.60
   3  -1   0   -0.10    0.60
   3  -1   0   -0.10    0.40
   3  -2   0   -1.00    0.60
   3  -2   0   -0.80    0.70
   2   3   0   -0.10    0.70
   3   3   0    1.50    1.50
  -3  -3   0    2.30    1.90
   3   3   0    5.70    1.30
  -3   4   0   -0.10    1.10
   4   3   0   -1.00    1.30
   3  -4   0   -1.20    1.10
   4   3   0    0.30    1.10
  -4  -3   0    5.00    2.10
   2  -4   0 9961.10  325.87
  -2   4   0 9909.21  325.47
  -4  -2   0 9970.00  329.87
   4   2   0 9999.00  321.27
   4   2   0 9901.61  329.47
  -1   4   0    1.90    1.60
  -4  -1   0    0.30    1.40
   0  -4   0 5243.68  176.38
   0   4   0 5378.96  177.38
   4   0   0 5339.97  173.68
  -4   0   0 5414.76  179.78
   4   0   0 5379.86  178.18
  -4   1   0   -1.50    1.10
   4  -1   0   -1.80    1.30
   4  -2   0  190.88    8.90
   2   4   0  226.58    9.60
  -4   2   0  194.68    8.70
   4  -2   0  202.18    7.90
   2   4   0  212.88    8.00
  -2  -4   0  211.68    9.80
   3   4   0   -0.40    0.80
   3   4   0    0.40    1.40
   4  -3   0   -1.10    1.00
  -4   3   0   -0.20    1.10
  -3  -4   0    1.20    1.50
   4  -4   0 1156.78   39.20
  -4  -4   0 1150.88   40.40
   4   4   0 1162.38   38.30
  -4   4   0 1150.68   39.10
   4   4   0 1118.59   40.10
  -4   5   0   -1.30    1.20
   4  -5   0   -0.90    1.30
   5   4   0   -1.50    1.70
  -5  -4   0   -2.10    1.50
   5   4   0   -1.10    1.20
   5   3   0    8.30    1.80
   5   3   0    8.00    2.50
  -3   5   0    8.60    2.10
   3  -5   0    6.80    2.10
  -5  -3   0    6.80    2.30
  -2   5   0   -3.30    1.30
   5   2   0   -2.50    1.50
  -5  -2   0   -3.90    1.30
   2  -5   0   -3.70    1.30
   5   2   0   -3.40    0.90
   5   1   0    2.80    2.20
   5   1   0    2.20    1.30
   1  -5   0    3.50    2.10
  -1   5   0    1.40    1.90
  -5  -1   0    1.20    2.00
   0   5   0    0.90    1.60
   0  -5   0    2.10    1.80
   5   0   0   -0.20    1.50
   5   0   0    0.10    0.80
  -5   0   0    0.80    1.30
  -5   1   0    9.80    2.10
   5  -1   0    8.20    1.50
  -1  -5   0    9.90    2.40
   5  -1   0   11.00    2.30
  -1  -5   0   11.50    2.70
  -5   2   0   -0.80    1.10
   5  -2   0   -0.70    1.10
  -2  -5   0    0.80    1.80
   5  -2   0   -1.50    0.90
   5  -3   0   32.90    2.90
  -5   3   0   36.60    3.50
  -3  -5   0   37.30    4.50
   3   5   0   39.40    3.00
   3   5   0   44.50    4.30
   5  -3   0   31.20    3.70
  -4  -5   0    0.20    1.50
   5  -4   0   -1.10    1.20
  -5   4   0   -0.90    1.30
   4   5   0   -0.20    1.50
   4   5   0   -1.00    1.00
   5   5   0    6.40    1.70
   5   5   0    5.50    2.60
  -5  -5   0    6.40    2.60
   5  -5   0    5.90    2.10
  -5   5   0    4.10    1.90
  -6  -5   0    1.50    1.80
  -5   6   0   -1.70    1.30
   5  -6   0   -0.90    1.50
   6   5   0    5.50    2.20
  -6  -4   0 1108.49   40.50
  -4   6   0 1124.79   39.40
   6   4   0 1124.89   40.60
   4  -6   0 1156.48   39.40
   6   4   0 1125.89   38.00
  -6  -3   0   -1.40    1.40
   3  -6   0   -1.00    1.30
   6   3   0   -1.30    1.50
   6   3   0   -2.40    1.00
  -3   6   0   -0.50    1.40
   6   2   0 2100.89   70.29
   2  -6   0 2103.09   69.29
   6   2   0 2097.99   67.99
  -2   6   0 2074.19   69.59
  -6  -2   0 2073.19   70.19
   6   1   0   -2.40    1.00
   1  -6   0   -1.80    1.70
  -1   6   0   -2.40    1.40
   6   1   0   -3.40    1.40
  -6  -1   0   -2.90    1.50
   6   0   0   69.89    3.80
  -6   0   0   66.29    5.10
   0   6   0   59.89    5.20
   0  -6   0   65.49    5.20
   6   0   0   69.59    5.30
  -6   1   0   -3.10    1.50
  -1  -6   0   -4.80    2.00
   6  -1   0   -2.30    1.10
  -1  -6   0   -3.80    2.00
   6  -1   0   -0.50    1.70
  -2  -6   0    7.70    3.20
   6  -2   0    2.20    2.10
   6  -2   0    2.00    1.50
  -2  -6   0    7.70    3.10
  -6   2   0    3.20    1.80
   3   6   0   -0.70    1.10
  -3  -6   0    0.80    2.00
   6  -3   0   -1.30    1.30
   3   6   0    0.30    1.80
  -6   3   0   -1.80    1.40
   4   6   0  957.30   35.40
   4   6   0  930.01   33.00
  -6   4   0 1011.90   34.40
   6  -4   0 1057.39   35.00
  -4  -6   0  902.11   35.30
   5   6   0   -2.50    1.30
  -6   5   0   -1.60    1.30
   6  -5   0   -0.80    1.40
   5   6   0    1.90    1.90
  -5  -6   0   -0.30    1.90
   6  -6   0  175.18    9.40
  -6   6   0  177.28    9.40
   6   6   0  178.38    8.30
  -6  -6   0  179.58   10.70
   6   6   0  170.88   10.30
   7   6   0    0.30    2.00
   6  -7   0   -0.40    1.80
   7   6   0    2.90    1.80
  -6   7   0   -2.20    1.60
  -7  -6   0   -1.20    1.90
   5  -7   0   -1.60    1.70
   7   5   0   -0.70    2.20
   7   5   0   -1.70    1.30
  -5   7   0   -1.30    1.70
  -7  -5   0   -1.30    1.90
  -4   7   0   -0.60    1.60
   7   4   0   -0.80    1.20
  -7  -4   0   -0.60    1.80
   4  -7   0   -0.90    1.60
   7   4   0   -0.50    1.80
  -3   7   0   18.00    3.30
   7   3   0   18.20    3.50
   7   3   0   15.60    2.40
   3  -7   0   14.70    2.80
  -7  -3   0   26.80    4.10
  -2   7   0    8.60    2.40
   2  -7   0    5.20    2.10
   7   2   0   -1.00    1.70
  -7  -2   0   -1.40    1.60
   7   1   0    4.90    2.10
  -1   7   0    4.30    2.30
  -7  -1   0    5.30    2.10
   1  -7   0    5.40    2.40
   7   1   0    7.20    1.60
   7   0   0    1.00    1.10
   7   0   0    0.20    1.60
   7  -1   0   28.30    2.80
  -7   1   0   25.40    3.60
  -1  -7   0   30.70    4.80
   7  -1   0   25.00    3.80
  -7   2   0   -0.70    1.30
   7  -2   0   -0.80    1.60
   7  -2   0   -0.80    1.10
  -2  -7   0   -1.70    1.90
  -2  -7   0    0.60    2.50
   7  -3   0    4.90    1.70
  -7   3   0    3.10    2.00
  -3  -7   0    4.70    3.30
   3   7   0    6.80    1.80
   7  -3   0    8.50    2.60
  -3  -7   0    9.70    3.40
   7  -4   0   -0.70    1.70
  -4  -7   0    3.40    2.60
   4   7   0   -0.30    2.00
   5   7   0    2.80    1.70
   7  -5   0    0.60    2.00
  -7   5   0    1.70    1.90
   5   7   0    0.40    2.40
  -5  -7   0    2.10    2.40
   7  -6   0   -1.80    1.90
   6   7   0   -3.00    1.40
  -6  -7   0    0.10    2.50
  -7   6   0   -1.20    1.70
   6   7   0    0.00    2.10
   7  -7   0   27.90    4.70
  -7  -7   0   27.80    5.10
   7   7   0   30.00    3.90
  -7   7   0   27.80    4.60
   7   7   0   30.60    5.30
   8   7   0   -0.70    2.40
   7  -8   0   -0.60    2.30
   8   7   0   -1.20    1.80
  -7   8   0   -2.10    2.00
  -8  -7   0    0.90    2.70
   8   6   0  552.44   24.00
  -8  -6   0  547.35   24.00
  -6   8   0  546.65   22.60
   6  -8   0  574.24   22.60
   8   6   0  550.84   20.80
  -5   8   0   -4.40    1.90
   5  -8   0   -1.70    2.20
   8   5   0   -2.30    1.50
  -8  -5   0    0.60    2.40
   8   5   0   -0.70    2.30
   4  -8   0 2124.09   71.19
   8   4   0 2107.09   72.99
  -4   8   0 2139.69   71.69
   8   4   0 2115.99   69.49
  -8  -4   0 2047.80   72.29
  -8  -3   0   -0.30    2.00
   3  -8   0   -0.60    1.80
   8   3   0   -0.40    2.00
  -3   8   0   -1.00    1.80
   8   3   0    0.70    1.50
   2  -8   0 1135.69   39.30
  -2   8   0 1064.29   39.70
  -8  -2   0 1111.29   40.20
   8   2   0 1089.79   37.40
   8   2   0 1099.89   40.30
  -1   8   0   -1.40    1.80
   1  -8   0    0.30    2.10
   8   1   0    1.10    1.90
   8   1   0    0.40    1.20
  -8  -1   0   -0.90    1.90
   8   0   0  124.99    8.40
   0  -8   0  139.99    8.50
   8   0   0  122.59    6.30
  -8   0   0  125.79    8.10
   0   8   0  122.79    8.40
   8  -1   0   -1.60    1.50
  -1  -8   0   -1.40    2.10
  -8   1   0   -1.80    1.60
   8  -1   0   -0.20    1.20
  -1  -8   0   -1.50    2.10
  -8   2   0  363.26   15.30
   8  -2   0  358.66   15.90
  -2  -8   0  334.67   16.00
  -2  -8   0  326.97   15.70
   8  -2   0  341.37   13.50
   3   8   0    1.80    1.70
   8  -3   0   -1.50    1.60
   8  -3   0   -1.40    2.00
  -8   3   0   -0.50    1.70
  -8   4   0  645.84   24.80
  -4  -8   0  653.33   26.60
   4   8   0  666.43   23.30
  -4  -8   0  644.24   26.00
   8  -4   0  635.84   25.50
  -5  -8   0    2.60    2.80
   8  -5   0   -1.30    1.90
   5   8   0    0.50    1.70
  -8   5   0   -0.50    1.70
   5   8   0   -1.60    2.10
   6   8   0    1.80    1.90
  -8   6   0    0.10    2.00
   6   8   0    3.60    3.10
   8  -6   0    3.70    2.80
  -6  -8   0    4.00    3.50
   7   8   0   -2.20    2.20
  -7  -8   0   -1.40    2.90
   8  -7   0    0.20    2.30
   7   8   0   -2.20    1.60
  -8   7   0   -1.90    1.90
  -8  -8   0 1589.14   58.29
   8   8   0 1640.04   53.99
  -8   8   0 1585.64   56.09
   8  -8   0 1607.14   56.39
   8   8   0 1516.65   57.39
   9   8   0   -0.30    2.80
  -8   9   0    0.70    3.00
   9   8   0   -1.00    2.50
   8  -9   0   -1.10    2.60
  -9  -8   0   -1.80    3.10
  -9  -7   0   16.40    5.00
   9   7   0   16.80    3.50
   9   7   0   23.50    5.50
   6  -9   0   -0.80    2.40
   9   6   0    2.80    2.20
   9   6   0   -2.70    2.50
  -9  -6   0   -0.10    2.90
  -6   9   0   -2.60    2.30
   5  -9   0   10.70    3.70
  -9  -5   0   10.70    3.70
  -5   9   0    8.10    3.30
   9   5   0    9.90    2.60
   9   5   0    9.70    4.00
   9   4   0    2.10    1.70
   9   4   0   -1.60    2.20
  -4   9   0   -0.90    2.20
  -9  -4   0    7.40    2.90
   4  -9   0    0.30    2.30
  -3   9   0    6.20    3.00
   9   3   0    3.70    2.60
  -9  -3   0    4.30    2.70
   9   3   0    4.90    2.00
   3  -9   0    5.00    2.80
   2  -9   0    0.30    2.40
  -2   9   0    3.40    2.40
  -9  -2   0    0.70    2.10
   9   2   0   -1.80    1.90
   9   2   0    0.10    1.40
  -9  -1   0   31.30    4.90
  -1   9   0   21.40    4.50
   9   1   0   27.90    4.80
   1  -9   0   35.20    5.60
   9   1   0   23.60    3.20
   9   0   0    0.00    1.40
   0  -9   0   -5.70    2.70
   9  -1   0  159.48    9.80
   9  -1   0  126.49    7.10
   9  -2   0   -0.20    1.70
   9  -2   0   -0.60    1.80
  -9   2   0   -0.40    1.80
  -2  -9   0   -0.60    2.70
  -2  -9   0    0.70    2.60
  -9   3   0    1.70    2.20
   3   9   0   -0.10    2.00
   9  -3   0    2.80    1.90
   9  -3   0    2.60    2.70
  -3  -9   0   -0.30    3.90
  -3  -9   0   -1.30    3.70
   9  -4   0   -1.10    2.20
  -9   4   0   -2.20    1.80
   4   9   0    2.10    2.10
  -9   6   0   -2.30    2.10
   6   9   0   -1.30    1.70
  -6  -9   0   -2.10    2.80
   6   9   0   -0.90    2.80
   9  -6   0   -2.50    2.40
  -9   7   0   -0.40    2.50
  -7  -9   0    3.40    4.60
   9  -7   0    6.20    3.20
   7   9   0    6.20    3.80
   7   9   0    2.20    2.30
   9  -8   0   -0.40    3.00
  -9   8   0    1.40    2.90
   9   9   0    2.40    3.80
   9  -9   0    3.70    3.30
   9   9   0    2.10    2.80
  -9   9   0    6.00    3.30
  -9  -9   0    5.40    4.10
  10   9   0    3.30    3.40
  -9  10   0   -2.00    3.00
   9 -10   0   -4.60    2.90
 -10  -9   0   -1.70    3.50
  10   8   0 1334.77   52.29
 -10  -8   0 1366.96   52.59
  10   8   0 1424.96   48.10
  -8  10   0 1403.06   50.89
   8 -10   0 1385.36   50.59
  10   7   0    1.70    2.30
  10   7   0   -1.60    3.10
 -10  -7   0   -0.90    3.10
  -7  10   0    0.30    3.00
   7 -10   0    0.30    2.70
  -6  10   0  769.02   30.90
  10   6   0  771.52   28.40
  10   6   0  796.82   32.80
   6 -10   0  774.22   30.50
 -10  -6   0  762.62   32.10
  10   5   0   -4.40    2.80
  -5  10   0    0.90    2.80
   5 -10   0   -0.10    2.90
 -10  -5   0   -6.20    2.90
  10   5   0   -0.30    2.00
 -10  -4   0 2484.85   85.39
  10   4   0 2439.56   85.59
  -4  10   0 2383.66   84.09
   4 -10   0 2494.75   83.69
  10   4   0 2532.45   81.59
   3 -10   0   -1.20    2.60
  10   3   0    8.30    3.30
 -10  -3   0    5.20    3.00
  10   3   0    1.10    1.80
  -3  10   0    1.40    3.20
  10   2   0 3163.08  103.19
 -10  -2   0 3202.58  106.79
  -2  10   0 3129.79  106.59
   2 -10   0 3196.68  105.59
  10   2   0 3129.49  107.09
  10   1   0   -0.80    2.50
  10   1   0   -1.50    1.50
  -1  10   0    1.50    3.10
 -10  -1   0   -3.20    2.40
  10   0   0   31.30    5.40
 -10   0   0   47.10    6.20
  10   0   0   37.10    4.20
  10  -1   0   -0.70    2.60
  -1 -10   0   14.80    4.30
  -1 -10   0    2.60    3.40
  10  -1   0   -1.80    1.80
 -10   1   0   -2.80    2.20
  -2 -10   0  242.18   13.50
  10  -2   0  228.58   10.70
  -2 -10   0  251.77   14.10
 -10   2   0  226.28   12.50
  10  -2   0  222.58   13.10
   3  10   0    0.30    1.90
  10  -3   0   -2.10    2.00
 -10   3   0   -0.60    2.10
  10  -3   0    1.00    2.90
  -3 -10   0   -7.00    4.00
  -3 -10   0   -5.70    3.60
  -4 -10   0  401.66   19.30
  10  -4   0  311.67   17.00
   4  10   0  338.87   14.40
 -10   4   0  320.57   16.00
  -4 -10   0  424.46   19.20
  -5 -10   0    1.50    3.20
   5  10   0    5.30    2.20
 -10   5   0   -2.50    2.40
  10  -5   0    1.20    2.60
  -5 -10   0    1.80    4.80
   6  10   0   44.40    5.40
 -10   6   0   53.49    7.00
  10  -6   0   55.99    7.60
  -6 -10   0   57.99    9.00
 -10   8   0  335.67   16.80
  10  -8   0  361.46   18.20
   8  10   0  331.37   14.80
   8  10   0  342.87   18.80
  -8 -10   0  332.57   19.20
   9  10   0   -2.80    2.40
  10  -9   0    7.90    3.80
   9  10   0    1.10    4.00
  -9 -10   0   -2.30    3.40
 -10   9   0   -2.50    2.70
  10  10   0    7.70    3.20
 -10 -10   0    9.60    5.00
  10  10   0    6.50    4.50
  11  10   0   -0.50    2.30
 -11  -9   0   23.30    6.10
  11   9   0   23.70    4.10
  11   8   0   -5.50    2.60
 -11  -8   0   10.00    4.20
  11   8   0   -1.80    3.30
   8 -11   0   -3.30    3.10
  -8  11   0   -4.80    2.70
   7 -11   0   -2.10    2.70
 -11  -7   0   -2.80    3.00
  11   7   0   -1.20    2.30
  -7  11   0   -0.40    3.10
  11   7   0   -0.80    3.10
  11   6   0   -1.80    2.20
  -6  11   0   -0.80    2.70
   6 -11   0    0.40    2.80
 -11  -6   0    0.40    3.10
  11   6   0    0.50    3.10
  11   5   0   37.60    5.00
  11   5   0   37.00    6.80
 -11  -5   0   37.30    6.80
   5 -11   0   35.90    5.60
  -5  11   0   29.20    5.50
 -11  -4   0   -3.60    3.00
  11   4   0    2.30    2.30
  11   4   0   -1.50    3.30
   4 -11   0   -4.50    2.80
  11   3   0    8.90    4.50
 -11  -3   0   10.90    4.40
  -3  11   0    5.00    4.40
  11   3   0   12.90    3.10
   3 -11   0    7.80    4.40
 -11  -2   0    1.50    2.90
  11   2   0    3.80    3.20
 -11  -1   0   -0.90    2.50
  11   1   0    3.90    2.30
   1 -11   0    5.20    3.50
  -1  11   0   -0.10    3.00
  11   1   0    2.40    3.20
   0 -11   0    2.40    3.40
 -11   0   0   -0.80    2.40
  11   0   0   -1.40    1.90
  11   0   0   -2.40    2.70
  -1 -11   0   -2.20    3.50
  11  -1   0   -0.70    2.70
  -1 -11   0   -5.20    3.20
 -11   1   0    1.30    2.60
  11  -1   0   -0.80    2.00
  11  -2   0    1.00    2.20
  11  -2   0    1.50    2.80
 -11   2   0   -0.90    2.60
  11  -3   0   16.00    4.50
 -11   3   0   15.70    4.40
  -3 -11   0   19.80    7.00
   3  11   0   22.50    3.70
  -3 -11   0   29.90    6.60
  11  -3   0   20.00    3.80
  11  -4   0   -3.50    3.80
  -4 -11   0   10.80    5.50
  -4 -11   0    1.50    4.90
  11  -5   0   56.29    8.20
 -11   5   0   53.09    6.90
  11  -6   0   -2.20    3.00
  -6 -11   0    9.60    4.30
 -11   6   0   -3.30    2.60
   7  11   0   18.90    3.60
  11  -7   0   19.50    5.00
 -11   7   0   12.30    4.30
  -7 -11   0   17.00    6.00
  -7 -11   0   18.70    6.70
   8  11   0   -2.10    2.60
  -8 -11   0    0.30    4.30
  11  -8   0    1.40    4.40
   8  11   0   -3.00    3.10
 -11   8   0   11.40    4.40
   9  11   0    8.80    3.00
   9  11   0   11.90    5.00
  -9 -11   0    6.10    4.30
  10  11   0    0.80    2.60
  11  11   0   -1.20    2.40
  12  11   0    0.40    2.70
  12  10   0   26.00    4.50
  12   9   0    0.80    2.60
  12   8   0   11.00    3.40
  12   7   0   -0.30    3.80
 -12  -7   0    0.40    3.30
  12   7   0    0.00    2.40
  -7  12   0   -2.00    3.40
  12   6   0  515.05   25.20
  -6  12   0  489.15   23.30
   6 -12   0  506.55   23.00
  12   6   0  502.45   20.60
 -12  -6   0  526.25   25.00
 -12  -5   0    1.30    3.60
  -5  12   0    5.60    3.60
  12   5   0   -3.60    3.30
  12   5   0   -2.50    2.20
   5 -12   0   -2.00    2.90
  12   4   0   15.70    3.50
   4 -12   0   15.90    4.30
  12   4   0   14.50    5.20
 -12  -4   0   21.20    5.50
  -4  12   0   11.80    4.60
  -3  12   0   -5.10    3.00
  12   3   0   -0.90    2.10
  12   3   0   -1.90    3.30
 -12  -3   0   -1.50    2.90
   3 -12   0   -2.00    3.20
  12   2   0 1691.43   56.99
   2 -12   0 1666.63   59.49
 -12  -2   0 1680.23   60.69
  12   2   0 1655.43   61.29
  -2  12   0 1670.93   60.99
  12   1   0   -0.50    3.00
  -1  12   0    1.50    3.20
   1 -12   0   -2.70    3.70
  12   1   0   -1.50    2.20
 -12  -1   0    1.20    3.30
  12   0   0  132.29   11.10
  12   0   0  143.49    8.40
 -12   0   0  131.59   10.30
   0 -12   0  132.19   11.30
  12  -1   0   -4.30    2.20
  -1 -12   0    0.50    4.20
  -1 -12   0   -2.30    4.30
 -12   1   0   -1.40    2.90
  12  -1   0   -0.70    3.20
  12  -2   0 2909.41  100.69
  -2 -12   0 2919.91   99.29
 -12   2   0 2991.90   99.19
  12  -2   0 2860.21   96.49
  -2 -12   0 2916.61  100.29
 -12   3   0   -4.60    2.60
  -3 -12   0   -2.00    3.90
  12  -3   0   -1.00    2.40
   3  12   0   -3.20    2.30
  12  -3   0   -3.40    2.70
  -3 -12   0    1.80    5.30
  12  -4   0  368.26   19.70
   4  12   0  368.56   15.60
 -12   4   0  388.56   18.30
  -4 -12   0  379.26   20.10
  -4 -12   0  380.86   21.30
  -5 -12   0   10.00    5.70
  12  -5   0   -4.10    3.40
  -5 -12   0   11.30    5.20
   5  12   0    5.40    2.70
  12  -6   0  645.04   29.20
   6  12   0  677.63   25.00
  -6 -12   0  648.34   29.80
 -12   6   0  688.33   27.90
  -6 -12   0  632.74   29.70
   7  12   0    2.00    2.50
  -7 -12   0   -3.30    4.30
   8  12   0 1426.56   48.70
  -8 -12   0 1366.06   54.59
   9  12   0    1.60    2.80
  10  12   0  181.18   10.50
  11  12   0   -3.90    2.80
  12  12   0   63.29    7.10
  13  12   0   -2.10    2.80
  13  11   0   -1.10    2.80
  13  10   0   -0.60    2.90
  13   9   0   10.00    3.30
  13   8   0   -4.90    2.60
  13   6   0   -0.50    2.40
  -5  13   0   12.40    5.00
  13   5   0   10.10    3.30
  13   4   0   -1.70    2.20
 -13  -4   0   -2.70    3.10
  -4  13   0   -0.30    3.40
  13   4   0   -5.30    3.40
   4 -13   0    0.70    3.10
  -3  13   0   22.00    6.30
  13   3   0   33.30    4.80
  13   3   0   27.00    6.30
 -13  -3   0   24.00    5.70
   3 -13   0   31.00    6.60
 -13  -2   0    4.60    3.60
  13   2   0    2.20    3.40
  13   2   0   12.30    3.10
  -2  13   0    2.90    4.30
 -13  -1   0    0.80    3.20
   1 -13   0    4.50    4.40
  13   1   0    7.80    4.20
  13   1   0   -5.10    2.30
   0 -13   0   -0.60    3.80
  13   0   0   -2.20    2.50
   0 -13   0    2.50    3.80
  13   0   0    4.90    3.70
 -13   0   0    2.40    3.50
 -13   1   0   -1.80    3.80
  13  -1   0    6.10    4.40
  13  -1   0    4.60    3.10
  -1 -13   0   10.00    4.50
  13  -3   0   -0.60    3.20
 -13   3   0    0.70    3.70
  13  -3   0    1.60    4.40
  -3 -13   0   11.10    5.70
  13  -4   0   -1.80    4.30
  -4 -13   0   12.90    6.80
  -4 -13   0   11.50    5.30
   4  13   0   -2.50    2.70
  -5 -13   0   61.09    9.50
  -5 -13   0   67.39   10.90
   5  13   0   45.60    5.60
   6  13   0    4.40    2.90
  -6 -13   0    0.20    3.70
  -7 -13   0   10.30    5.40
   7  13   0   12.00    3.50
   8  13   0   -2.40    2.80
   9  13   0   30.40    5.00
  10  13   0   -0.30    2.70
  11  13   0   19.10    4.30
  12  13   0    6.00    3.40
  13  13   0   -0.40    3.30
  14  13   0   -3.20    3.10
  14  12   0    2.30    3.70
  14  11   0   -4.50    2.90
  14  10   0  972.40   36.50
  14   9   0    1.50    2.90
  14   8   0  197.58   11.40
  14   7   0   -2.90    2.30
  14   6   0  143.29    9.40
  14   5   0    0.80    2.80
  14   4   0  348.77   15.90
  -3  14   0   -0.20    5.20
  14   3   0   -1.90    2.40
  -2  14   0   11.80    5.20
  14   2   0   12.20    3.50
   1 -14   0   -2.00    4.40
  14   1   0   -0.40    2.60
  14   0   0   42.20    5.80
   0 -14   0   52.29    8.90
   0 -14   0   51.19    8.00
  14  -1   0   -2.80    2.60
  -1 -14   0    0.10    4.00
  -1 -14   0    0.60    3.80
  -2 -14   0  547.95   25.70
  -2 -14   0  572.74   27.10
  14  -2   0  557.54   23.00
  -3 -14   0    1.40    4.10
  14  -3   0    1.70    2.80
  -3 -14   0   -5.20    4.60
   3  14   0   -4.40    2.20
   4  14   0  191.68   10.60
  -4 -14   0  244.78   18.20
  -5 -14   0    2.00    5.30
   5  14   0   -3.30    2.40
   6  14   0  187.98   10.40
  -6 -14   0  183.68   15.70
   7  14   0    1.40    2.80
   8  14   0  311.97   14.70
   9  14   0    3.90    3.00
  10  14   0   97.59    8.30
  11  14   0    0.50    3.00
  12  14   0  668.73   26.90
  13  14   0    0.80    3.50
  14  14   0  647.74   26.90
  15  14   0   -3.80    3.50
  15  13   0   -4.90    3.60
  15  12   0   -3.00    3.50
  15  11   0   19.00    4.80
  15  10   0   -1.80    3.20
  15   9   0    3.20    3.50
  15   8   0    3.30    3.20
  15   7   0   30.50    5.20
  15   6   0    5.20    3.50
  15   5   0    6.30    3.30
  15   4   0   -0.90    3.00
  15   3   0   -0.70    2.70
  15   2   0    0.60    2.80
  15   1   0   -0.60    2.80
   0 -15   0   -0.50    4.50
  15   0   0    1.50    2.90
  15  -1   0   23.70    4.60
  -1 -15   0   13.80    5.50
  -2 -15   0   14.20    5.60
  -3 -15   0   -0.80    5.50
  -4 -15   0   -6.10    5.60
  16  14   0   77.29    9.90
  16  13   0   -6.10    3.60
  16  12   0   24.20    5.30
  16  11   0    0.20    3.70
  16  10   0  329.47   17.00
  16   9   0   -5.50    3.20
  16   8   0  211.38   12.70
  16   7   0   -1.80    3.00
  16   6   0  150.68   10.60
  16   5   0   -4.70    2.80
  16   4   0  650.83   26.60
  16   3   0    1.70    3.20
  16   2   0  127.89    9.90
  16   1   0    6.10    3.30
   1 -16   0    0.40    4.70
   0 -16   0  374.46   22.30
  16   0   0  393.86   18.30
  16  -1   0    2.40    3.40
  -1 -16   0   10.30    5.20
  -2 -16   0  280.97   26.70
  16  -2   0  275.47   14.80
  17  13   0   -2.90    4.10
  17  12   0   -0.20    4.10
  17  11   0    1.50    4.00
  17  10   0   -0.20    4.10
  17   9   0    0.40    3.70
  17   8   0   -1.10    3.60
  17   7   0   16.60    5.00
  17   6   0    0.00    3.50
  17   5   0   10.10    4.20
  17   4   0    2.50    3.60
  17   3   0    0.20    3.50
  17   2   0   -1.00    3.60
  17   1   0    5.10    3.90
  17   0   0    1.20    3.70
  17  -1   0   -2.30    3.80
  18  13   0   -6.10    4.20
  18  12   0   32.50    6.90
  18  11   0   -4.70    4.00
  18  10   0  228.78   14.60
  18   9   0    0.70    3.80
  18   8   0   -3.00    3.60
  18   7   0   -5.40    3.30
  18   6   0   10.90    4.70
  18   5   0   -6.60    3.80
  18   4   0    1.60    4.40
  18   3   0   -4.20    3.70
  18   2   0  126.59   11.00
  18   1   0    0.40    3.70
  18   0   0  254.17   15.30
  18  -1   0    3.00    4.00
  19  12   0    3.40    4.90
  19  11   0   -1.30    4.40
  19  10   0   -2.20    4.50
  19   9   0   32.80    6.90
  19   7   0    3.20    4.50
  19   6   0   -0.90    4.40
  19   5   0   -3.40    4.00
  19   4   0   -4.50    3.80
  19   3   0   -0.20    4.10
  19   2   0   -4.70    3.70
  19   1   0    7.80    4.80
  19   0   0    4.00    4.40
  20  11   0   -0.30    4.90
  20  10   0  599.24   28.20
  20   9   0   -0.40    4.80
  20   8   0   58.19    8.80
  20   7   0    1.00    4.60
  20   6   0  431.86   22.10
  20   5   0    0.30    4.50
  20   4   0  269.07   16.90
  20   3   0   -0.20    4.70
  20   2   0   21.60    6.00
  20   1   0   -4.80    4.30
  21   9   0    9.20    5.90
  21   8   0   -4.90    5.00
  21   7   0   22.90    7.20
  21   6   0    2.30    5.20
  21   5   0   -2.90    4.80
  21   4   0    0.90    5.10
  21   3   0    4.60    5.50
  21   2   0   -3.20    4.20
  22   6   0  226.58   16.60
  22   5   0    0.70    5.50
  22   4   0  109.29   12.30
  22   3   0    3.90    5.50
   1   0  -1  720.93   23.90
   0   1   1  740.43   23.60
  -1   0   1  701.73   23.90
   1  -1  -1 5948.50  192.58
   1   1  -1 5811.82  192.28
  -1  -1   1 5829.32  193.18
  -1   1   1 5983.40  191.98
   1  -2  -1   64.09    3.40
  -1   2   1   59.79    3.30
   2   1   1   64.19    3.20
   0  -2  -1   49.00    2.80
   2   0  -1   50.89    3.20
   0  -2   1   55.59    3.00
  -2   0   1   49.60    3.20
   0   2   1   45.90    2.80
  -1  -2  -1  253.37    9.00
  -1  -2  -1  226.08    8.70
   2  -1  -1  232.68    9.10
   2  -1   1  223.38    8.60
   1   2   1  235.78    8.90
  -2   1   1  243.08    9.20
  -2  -2  -1  284.97   10.60
   2  -2  -1  291.07   10.70
  -2  -2  -1  256.87   10.30
   2   2  -1  270.97   10.90
   2   2   1  274.57   10.50
   2  -2   1  283.77    9.80
  -2   2   1  296.27   10.70
  -2  -2   1  275.47   11.00
   3   2  -1 1793.22   59.29
  -2   3  -1 1672.93   57.39
   2  -3  -1 1854.91   58.59
  -2   3  -1 1730.43   57.99
  -3  -2  -1 1829.02   58.69
  -2   3   1 1814.12   58.49
   2  -3   1 1869.31   57.09
  -3  -2   1 1793.52   59.29
   2  -3   1 1727.43   57.89
   3   2   1 1788.32   58.69
  -1   3  -1  577.74   21.60
  -3  -1  -1  629.34   21.70
   1  -3  -1  656.63   22.00
   3   1  -1  661.33   22.70
  -3  -1   1  628.84   22.50
   1  -3   1  669.43   20.50
   1  -3   1  613.44   21.60
  -1   3   1  626.84   21.90
   3   1   1  643.74   22.00
   3   1   1  631.64   21.90
   0  -3  -1 1964.70   62.99
   3   0  -1 1861.11   63.59
   3   0   1 1907.51   62.69
   3   0   1 2029.10   62.99
  -3   0   1 1929.81   63.59
   0   3   1 1945.11   63.19
   3  -1   1   12.90    2.00
   2   3  -1   -0.30    1.20
  -3   2  -1    0.90    1.00
  -2  -3  -1    1.40    1.60
  -2  -3  -1    1.70    1.50
   2   3   1    3.30    1.50
  -2  -3   1    1.50    1.30
   3  -2   1    0.80    0.90
   3  -2   1   -0.20    1.00
  -2  -3   1   -0.50    0.80
   3   3  -1   57.39    4.50
   3   3  -1   60.59    3.00
   3  -3   1   56.29    2.80
   3  -3   1   42.40    3.60
  -3  -3   1   53.09    4.50
   3  -4  -1   34.30    3.70
   4   3  -1   29.40    3.80
  -4  -3  -1   29.10    3.50
   3  -4   1   29.00    3.10
  -4  -3   1   27.80    4.10
   4   3   1   27.80    3.50
   3  -4   1   30.80    2.00
   4   3   1   26.80    3.40
  -4  -2  -1  403.06   15.60
   4   2  -1  395.96   16.30
   4   2  -1  395.06   14.40
  -2   4  -1  403.06   13.90
   2  -4  -1  407.76   15.50
  -2   4  -1  440.56   15.40
  -4  -2   1  399.26   16.20
  -2   4   1  400.96   15.50
   4   2   1  390.66   15.30
   2  -4   1  412.96   13.60
   2  -4   1  475.85   15.40
   4   2   1  408.06   15.80
  -1   4  -1    3.00    1.70
  -4  -1  -1    6.50    1.60
   1  -4  -1    5.10    1.60
   4   1  -1    2.70    1.80
  -4  -1   1    3.30    1.70
   4   1   1    7.90    1.70
   1  -4   1    0.80    1.90
  -1   4   1    9.00    1.90
  -4   0  -1  122.49    5.90
   0  -4  -1  126.29    6.30
   0   4   1  127.99    6.60
   4   0   1  125.89    6.10
   4   0   1  125.99    6.00
   0  -4   1  136.39    6.90
  -1  -4  -1  429.26   16.10
   4  -1  -1  429.16   16.60
  -4   1  -1  437.36   15.40
  -4   1   1  442.96   16.50
   1   4   1  413.76   16.30
   4  -1   1  443.86   15.80
   4  -1   1  443.06   15.40
  -1  -4   1  425.56   16.50
   4  -2  -1  428.16   16.50
   2   4  -1  437.06   16.60
   2   4  -1  439.56   14.20
  -2  -4  -1  415.36   16.30
  -2  -4  -1  415.76   16.20
  -4   2  -1  429.16   15.30
   4  -2   1  434.16   15.00
  -2  -4   1  423.16   14.30
   4  -2   1  422.96   15.60
  -4   2   1  437.16   16.30
  -2  -4   1  424.66   16.60
   3   4  -1  619.54   24.00
  -3  -4  -1  683.83   24.10
  -4   3  -1  681.33   22.90
   4  -3  -1  676.13   24.00
  -4   3   1  663.93   23.60
  -3  -4   1  615.54   24.20
   4  -3   1  640.34   22.90
   4  -3   1  635.34   22.00
   3   4   1  690.63   24.10
   4   4  -1   27.10    2.20
  -4   4  -1   23.10    2.80
  -4  -4  -1   24.30    3.60
   4  -4   1   19.80    2.70
   4   4   1   19.60    3.20
   4  -4   1   20.90    1.90
   4   4   1   21.70    3.00
   4  -5  -1  108.09    6.60
   5   4  -1  104.09    7.10
  -4   5  -1   96.09    5.90
  -5  -4  -1  107.99    6.90
   5   4  -1  105.99    4.90
   5   4   1  101.59    6.70
   4  -5   1  100.89    5.90
  -5  -4   1  104.69    7.20
   5   4   1  115.09    6.30
   4  -5   1  107.99    4.70
  -4   5   1  108.19    6.50
  -3   5  -1 1741.23   57.49
   5   3  -1 1686.43   58.89
   3  -5  -1 1755.52   57.79
   5   3  -1 1699.83   56.19
  -5  -3  -1 1742.93   58.29
   3  -5   1 1728.63   57.29
  -3   5   1 1736.93   57.89
   5   3   1 1725.13   58.29
  -5  -3   1 1715.33   58.89
   5   3   1 1744.23   57.49
   5   2  -1  145.99    6.40
  -2   5  -1  140.39    7.30
   5   2  -1  141.19    8.10
  -2   5  -1  144.89    5.40
  -5  -2  -1  141.99    7.30
  -2   5   1  155.58    7.50
   2  -5   1  139.59    7.30
  -5  -2   1  147.09    8.10
   5   2   1  142.99    7.60
   5   2   1  141.59    7.10
  -5  -1  -1 1096.79   36.60
   1  -5  -1 1091.39   36.60
  -1   5  -1 1000.60   36.50
   5   1  -1 1067.29   37.50
   1  -5   1 1058.49   36.40
   5   1   1 1088.19   36.20
   5   1   1 1064.19   36.70
  -5  -1   1 1058.09   37.40
  -1   5   1 1068.89   36.80
  -5   0  -1  713.93   25.20
   5   0  -1  710.93   26.30
  -5   0   1  721.23   26.20
   5   0   1  712.53   25.50
   0  -5   1  710.13   25.80
   5   0   1  741.03   24.90
  -1  -5  -1 1164.58   41.10
  -5   1  -1 1246.48   40.60
   5  -1  -1 1238.48   42.00
   1   5   1 1171.98   41.50
  -5   1   1 1231.58   41.70
  -1  -5   1 1192.78   41.50
   5  -1   1 1212.28   40.90
   5  -1   1 1226.48   40.20
  -5   2  -1    0.50    1.30
  -2  -5  -1    1.20    1.90
  -2  -5  -1    4.40    2.20
   5  -2   1    2.20    1.40
   5  -2   1    1.30    1.20
   3   5  -1   63.79    3.10
   5  -3  -1   64.99    5.30
   3   5  -1   62.79    5.50
   5  -3   1   79.99    3.80
  -5   3   1   63.39    4.90
  -3  -5   1   75.39    5.80
   4   5  -1  536.35   21.50
   4   5  -1  541.25   18.60
   5  -4  -1  567.54   21.20
  -4  -5  -1  535.45   21.40
  -5   4  -1  557.24   20.10
   5  -4   1  535.95   20.10
  -4  -5   1  537.15   21.80
   5  -4   1  561.44   18.80
  -5   4   1  562.64   20.90
   4   5   1  553.44   21.40
  -5   5  -1    4.20    1.70
  -5  -5  -1    2.80    2.30
   5   5  -1    1.70    1.20
   5  -5  -1    2.80    1.90
   5   5  -1    4.90    2.40
   5   5   1    3.20    2.00
  -5   5   1    2.80    1.90
   5  -5   1    4.80    1.80
   5  -5   1    1.40    1.20
   5   5   1    4.10    1.90
  -5  -5   1    1.50    2.10
   6   5  -1  112.19    8.10
   6   5  -1  123.69    5.60
   5  -6  -1  115.99    7.50
  -6  -5  -1  110.29    7.80
  -5   6  -1  109.19    7.00
  -6  -5   1  112.59    8.20
   6   5   1  115.09    7.80
  -5   6   1  109.39    7.30
   5  -6   1  114.09    6.90
   6   5   1  115.69    6.80
   6   4  -1  399.16   17.60
   6   4  -1  418.66   14.60
   4  -6  -1  389.96   16.30
  -4   6  -1  386.26   16.00
  -6  -4  -1  385.06   16.80
  -4   6   1  395.96   16.40
   6   4   1  399.66   17.00
   6   4   1  399.76   15.90
  -6  -4   1  397.46   17.50
   4  -6   1  399.76   15.80
  -6  -3  -1    4.30    2.10
   6   3  -1    4.70    2.50
   6   3  -1    5.00    1.60
   3  -6  -1    4.10    2.00
  -3   6  -1    5.40    2.10
   3  -6   1    7.10    2.10
  -6  -3   1    5.00    2.40
   6   3   1    4.70    1.90
   6   3   1    6.40    2.40
  -3   6   1    6.20    2.20
   6   2  -1   30.60    4.10
  -2   6  -1   23.80    1.80
   2  -6  -1   35.20    3.80
   6   2  -1   22.00    2.80
  -2   6  -1   30.20    4.00
   6   2   1   23.70    3.70
   6   2   1   23.90    3.30
  -6  -1  -1   19.70    3.20
   6   1  -1   19.80    3.40
  -1   6  -1   18.30    3.20
   1  -6  -1   22.70    3.50
   6   1  -1   22.10    2.70
   6   1   1   18.90    3.40
  -1   6   1   26.50    3.80
   6   1   1   19.90    2.80
   1  -6   1   19.40    3.50
  -6  -1   1   20.00    3.40
   6   0  -1   97.69    6.90
  -6   0  -1   97.19    5.90
   6   0   1  116.19    6.60
   6   0   1  101.09    5.60
  -6   0   1  100.69    6.70
   6  -1  -1  168.68    9.30
  -6   1  -1  179.08    8.30
  -1  -6  -1  166.38    8.90
   6  -1   1  192.18    8.00
  -1  -6   1  167.58    9.20
  -1  -6   1  214.48   10.00
  -6   1   1  176.18    9.10
   6  -1   1  178.38    8.70
   1   6   1  158.08    9.30
  -2  -6  -1   -0.20    1.60
  -6   2  -1   -0.10    1.20
  -2  -6  -1   -0.90    1.70
   6  -2  -1   -1.00    1.50
  -6   2   1   -1.30    1.30
   6  -2   1    0.60    1.40
  -2  -6   1    1.10    2.30
   6  -2   1   -0.40    1.00
   3   6  -1   88.39    3.90
   6  -3  -1   96.49    6.60
   3   6  -1   84.09    6.50
  -3  -6  -1   81.89    6.30
  -3  -6  -1   81.49    6.80
  -6   3  -1   88.89    5.40
  -6   3   1   94.69    6.20
   6  -3   1   94.69    4.60
  -3  -6   1   86.49    6.90
   6  -3   1   87.49    5.70
   4   6  -1   77.29    6.40
  -4  -6  -1   87.49    6.60
   6  -4  -1   65.99    5.90
  -6   4  -1   69.29    5.10
   4   6  -1   79.79    3.90
  -4  -6  -1   98.49    6.90
  -6   4   1   67.89    5.60
   4   6   1   95.89    6.50
   6  -4   1   73.49    4.20
   6  -4   1   69.19    5.30
  -4  -6   1   84.39    6.70
   5   6  -1  375.36   16.90
  -5  -6  -1  399.76   17.30
   5   6  -1  392.06   13.80
   6  -5  -1  384.46   16.50
  -6   5  -1  365.56   15.30
   5   6   1  378.46   15.50
   6  -5   1  384.46   14.00
  -6   5   1  383.66   16.10
  -5  -6   1  388.56   17.50
   6  -5   1  363.36   15.40
   5   6   1  374.26   16.70
   6   6  -1  111.49    8.30
   6   6  -1  114.49    5.50
  -6   6  -1   96.59    6.90
   6  -6  -1  111.69    7.70
  -6   6   1  111.59    7.50
   6   6   1  112.89    7.00
   6   6   1  119.39    8.00
   6  -6   1  105.09    7.10
  -6  -6   1  108.19    8.60
   7   6  -1  247.98   10.50
  -7  -6  -1  254.57   13.60
   7   6  -1  268.37   14.10
  -6   7  -1  259.67   12.60
   6  -7  -1  260.97   12.80
   7   6   1  254.67   13.40
   7   6   1  250.07   12.00
  -7  -6   1  257.57   14.10
   6  -7   1  252.97   12.20
  -6   7   1  259.77   12.70
  -5   7  -1   15.50    3.40
   7   5  -1   18.70    4.00
   5  -7  -1   16.40    3.60
   7   5  -1   15.50    2.40
  -7  -5  -1   17.10    3.90
  -7  -5   1   18.40    4.00
  -5   7   1   14.70    3.60
   7   5   1   14.60    3.60
   5  -7   1   15.70    3.30
   7   5   1   15.90    3.20
  -7  -4  -1  320.27   14.90
   7   4  -1  334.27   12.50
   4  -7  -1  330.47   14.40
  -4   7  -1  303.87   14.10
   7   4  -1  325.37   15.70
   4  -7   1  316.27   13.90
  -7  -4   1  310.57   15.30
   7   4   1  328.37   15.10
   7   4   1  323.47   13.70
  -4   7   1  320.37   14.40
  -7  -3  -1   25.10    4.10
   3  -7  -1   26.60    3.90
   7   3  -1   24.60    4.30
   7   3  -1   25.00    2.90
  -3   7  -1   27.50    4.10
   7   3   1   28.50    3.80
   3  -7   1   26.50    3.90
  -3   7   1   22.80    3.80
  -7  -3   1   32.50    4.90
   7   3   1   27.60    4.40
   7   2  -1 1785.12   58.09
  -2   7  -1 1718.03   59.69
   2  -7  -1 1771.62   59.59
  -7  -2  -1 1712.23   59.89
   7   2  -1 1761.62   60.89
  -2   7   1 1745.23   59.99
   7   2   1 1733.33   60.19
   2  -7   1 1806.22   59.49
   7   2   1 1792.02   58.79
  -7  -2   1 1782.22   60.99
   7   1  -1    2.10    1.40
  -1   7  -1   -0.60    1.70
  -7  -1  -1   -2.10    1.60
   7   1  -1    8.40    2.50
   1  -7  -1   -0.20    1.90
  -1   7   1    4.20    2.20
   7   1   1    1.00    1.50
   1  -7   1   -0.50    2.10
  -7  -1   1    5.90    2.20
   7   1   1   -1.10    1.60
  -7   0  -1   14.30    2.80
   7   0  -1   17.40    3.50
   7   0   1   11.40    2.70
   7   0   1   13.60    2.40
  -7   0   1   12.80    3.20
  -7   1  -1  167.48    8.50
   7  -1  -1  171.18    9.60
  -1  -7  -1  167.68    9.10
  -1  -7   1  151.08    9.50
  -7   1   1  176.18    9.40
   7  -1   1  163.08    7.60
   1   7   1  171.88    9.80
  -1  -7   1  160.48    9.50
   7  -1   1  170.38    8.90
  -7   2  -1   -0.40    1.70
   7  -2  -1    2.40    2.10
  -7   2   1    2.30    2.00
   7  -2   1    1.80    1.50
  -3  -7  -1  174.58   10.20
  -3  -7  -1  149.79    9.30
   7  -3  -1  157.18    9.60
   3   7  -1  166.78    6.40
  -7   3  -1  178.28    8.50
   7  -3   1  180.18    7.50
  -7   3   1  169.08    9.20
  -3  -7   1  153.78   10.10
   7  -3   1  158.38    8.70
  -7   4  -1  256.87   12.00
   4   7  -1  264.17    9.90
  -4  -7  -1  302.27   13.50
   7  -4  -1  264.97   13.20
  -4  -7  -1  300.17   14.00
   4   7  -1  256.67   13.30
   7  -4   1  275.07   10.60
  -7   4   1  258.27   12.50
  -4  -7   1  241.68   13.40
   7  -4   1  260.47   12.40
   7  -5  -1 1465.05   50.29
  -7   5  -1 1437.76   48.80
  -5  -7  -1 1385.76   50.59
   5   7  -1 1448.85   50.79
   5   7  -1 1397.96   46.60
   7  -5   1 1434.16   47.10
   5   7   1 1414.26   50.29
  -5  -7   1 1392.36   51.09
   7  -5   1 1416.26   49.10
   5   7   1 1359.66   48.50
  -7   5   1 1460.55   49.60
   7  -6  -1    3.90    2.50
   6   7  -1    6.50    2.60
  -7   6  -1    6.50    2.40
  -6  -7  -1    2.70    3.00
  -6  -7   1    8.60    3.20
   7  -6   1    1.50    1.80
   6   7   1    1.30    2.40
   7  -6   1   -0.30    2.10
   6   7   1    0.50    2.50
   7   7  -1   89.69    8.30
  -7  -7  -1   92.59    8.00
   7   7  -1   95.39    5.40
   7  -7  -1   83.69    7.40
  -7   7  -1   82.49    6.90
   7  -7   1   90.79    7.00
   7   7   1   78.49    6.60
   7   7   1   81.99    7.40
  -7  -7   1   86.29    8.50
  -7   7   1   87.89    7.30
   7  -8  -1   84.39    7.70
  -7   8  -1   83.99    7.40
   8   7  -1   80.49    8.20
  -8  -7  -1   77.59    7.90
   8   7  -1   84.79    5.50
   8   7   1   76.89    7.70
  -8  -7   1   82.99    8.40
  -7   8   1   85.49    7.60
   7  -8   1   80.39    7.10
   8   7   1   82.59    6.80
   8   6  -1   21.90    3.00
  -6   8  -1   23.10    4.40
   6  -8  -1   28.70    4.70
   8   6  -1   29.50    5.80
  -8  -6  -1   28.00    5.10
   8   6   1   20.80    3.90
   8   6   1   22.00    4.60
  -8  -6   1   26.10    5.50
   6  -8   1   23.70    4.00
  -6   8   1   26.30    4.60
  -8  -5  -1   79.29    7.30
   5  -8  -1   75.79    6.70
   8   5  -1   78.69    7.60
  -5   8  -1   86.29    7.00
   8   5  -1   76.79    5.20
   8   5   1   89.09    7.60
  -5   8   1   67.99    6.70
   8   5   1   93.19    6.40
  -8  -5   1   96.79    8.30
   5  -8   1   76.29    6.50
   8   4  -1  141.99    7.10
  -4   8  -1  132.59    8.60
   4  -8  -1  125.39    8.50
  -8  -4  -1  154.98    9.30
   8   4  -1  143.39    9.80
   8   4   1  136.79    7.90
  -4   8   1  127.89    8.70
  -8  -4   1  121.29    9.20
   8   4   1  134.29    9.20
   4  -8   1  137.49    8.40
   8   3  -1   18.00    2.80
  -8  -3  -1   12.20    3.30
   8   3  -1   15.60    3.80
   3  -8  -1   14.70    3.30
   8   3   1   11.70    2.70
  -3   8   1   16.40    3.60
   8   3   1   13.20    3.40
   2  -8  -1    4.10    2.20
  -8  -2  -1    1.10    1.90
  -2   8  -1    3.00    2.40
   8   2  -1    0.70    2.30
   8   2   1    1.70    2.10
  -2   8   1    1.70    2.10
  -8  -2   1    0.50    2.20
   8   2   1    1.70    1.90
   2  -8   1    3.40    2.50
   8   1  -1   34.40    3.70
   1  -8  -1   39.70    5.20
   8   1  -1   34.50    5.40
  -8  -1  -1   33.50    4.30
   8   1   1   34.30    3.80
  -8  -1   1   31.80    4.90
   1  -8   1   28.70    4.80
   8   1   1   34.60    4.80
  -1   8   1   33.90    5.30
   8   0  -1  227.88   12.60
  -8   0  -1  229.18   11.30
   0  -8  -1  266.77   12.30
   8   0  -1  235.08   10.40
   8   0   1  228.38   11.80
   8   0   1  226.38   10.30
   0  -8   1  222.48   11.80
  -8   0   1  241.98   12.30
   0   8   1  260.67   12.90
  -8   1  -1  170.18    9.00
   8  -1  -1  171.38   10.20
  -1  -8  -1  153.08    9.40
   1   8   1  154.68   10.10
  -1  -8   1  170.48   10.20
  -8   1   1  160.28    9.50
   8  -1   1  169.98    7.90
  -1  -8   1  163.28   10.00
   8  -1   1  163.48    9.40
   8  -2  -1    4.50    2.70
  -8   2  -1    2.90    2.10
  -2  -8  -1    8.00    3.10
  -2  -8  -1    6.80    3.00
   8  -2   1    4.30    2.40
   8  -2   1    4.40    1.60
  -8   2   1    3.50    2.40
  -2  -8   1    6.60    3.40
  -2  -8   1    2.60    3.50
  -8   3  -1   35.20    4.40
   8  -3  -1   33.90    5.40
  -3  -8  -1   54.79    6.30
   3   8  -1   37.90    2.70
  -3  -8  -1   47.10    6.50
  -3  -8   1   46.20    7.40
  -8   3   1   38.00    5.00
   8  -3   1   39.40    3.60
   8  -3   1   48.60    5.50
   4   8  -1  295.77   11.00
  -5  -8  -1   35.80    6.20
  -5  -8  -1   27.30    5.20
   8  -5  -1   28.00    4.80
   5   8  -1   42.40    6.40
  -8   5  -1   35.40    4.60
   5   8  -1   37.50    3.20
   8  -5   1   33.10    5.00
  -5  -8   1   39.10    6.10
  -8   5   1   31.60    5.00
   8  -5   1   37.20    3.80
   5   8   1   37.50    4.80
  -8   6  -1    9.80    3.00
   6   8  -1   17.90    2.80
   8  -6  -1    7.70    3.40
   6   8  -1   11.20    4.10
  -8   6   1   11.10    3.30
   8  -6   1    8.20    3.20
   8  -6   1    7.50    2.60
  -6  -8   1   12.60    4.30
  -7  -8  -1  322.17   17.50
   7   8  -1  343.37   13.30
  -8   7  -1  329.47   15.60
   7   8  -1  337.17   17.20
   8  -7  -1  361.96   17.10
  -8   7   1  337.57   16.10
   8  -7   1  344.37   15.90
   7   8   1  342.87   15.20
   7   8   1  361.16   17.50
  -7  -8   1  337.57   17.90
   8   8  -1    5.30    2.50
  -8   8  -1    2.40    3.10
  -8  -8  -1    7.00    3.90
   8  -8  -1   12.70    4.00
   8   8  -1    5.20    3.80
  -8  -8   1    7.90    4.50
   8   8   1    5.20    3.60
  -8   8   1   14.60    3.80
   8  -8   1    2.20    3.20
   8   8   1   13.10    3.70
   9   8  -1   38.70    7.20
   9   8  -1   42.60    4.70
   8  -9  -1   31.50    5.50
  -8   9  -1   31.80    5.40
  -9  -8  -1   27.90    5.70
  -9  -8   1   31.10    6.30
   9   8   1   30.50    5.70
  -8   9   1   36.60    6.00
   8  -9   1   29.30    5.30
   9   8   1   32.40    5.20
   9   7  -1 1892.61   61.29
   7  -9  -1 1843.22   64.39
  -9  -7  -1 1861.41   65.89
   9   7  -1 1824.52   66.19
  -7   9  -1 1809.12   63.99
  -7   9   1 1782.92   64.19
   7  -9   1 1843.72   63.69
   9   7   1 1859.61   62.89
  -9  -7   1 1860.21   66.49
   9   7   1 1758.12   65.39
   9   6  -1    0.60    2.10
  -6   9  -1    7.20    3.00
   9   6  -1    4.50    3.50
   6  -9  -1    4.30    3.10
  -9  -6  -1    2.10    3.10
   9   6   1   -0.30    2.90
  -9  -6   1   -0.60    3.10
  -6   9   1    7.40    3.30
   9   6   1    0.40    2.50
   6  -9   1    5.20    2.90
  -9  -5  -1   18.90    4.30
   9   5  -1   13.40    4.20
  -5   9  -1   14.20    3.80
   5  -9  -1   13.20    3.60
   9   5  -1   18.20    3.00
   5  -9   1   13.10    3.50
   9   5   1   18.50    4.40
   9   5   1   12.30    3.30
  -5   9   1   15.30    4.00
  -9  -5   1   12.80    4.20
   9   4  -1  197.48   12.40
   9   4  -1  188.88    9.20
  -9  -4  -1  216.88   12.00
  -4   9  -1  186.88   11.40
  -9  -4   1  185.18   12.10
   4  -9   1  183.68   10.60
   9   4   1  182.68   10.00
   9   4   1  211.08   12.20
  -3   9  -1 1929.71   67.79
   3  -9  -1 1991.50   67.39
   9   3  -1 1952.90   65.29
   9   3  -1 1994.80   69.39
  -9  -3  -1 1940.91   67.99
   9   3   1 1984.30   65.99
   3  -9   1 1978.00   66.99
  -3   9   1 1983.30   67.99
  -9  -3   1 1943.81   68.99
   9   3   1 1970.70   68.49
   9   2  -1  424.16   16.10
  -2   9  -1  379.16   18.00
   9   2  -1  380.36   18.90
  -9  -2  -1  424.86   18.20
   2  -9  -1  395.66   17.60
  -2   9   1  393.96   18.10
   2  -9   1  414.96   18.00
  -9  -2   1  401.86   18.80
   9   2   1  409.16   16.40
   9   2   1  417.86   18.50
   9   1  -1  815.32   31.90
   9   1  -1  782.92   28.70
  -9  -1  -1  827.62   30.60
   1  -9  -1  790.92   30.20
  -1   9   1  793.62   31.20
  -9  -1   1  774.92   31.20
   9   1   1  803.32   31.00
   1  -9   1  860.61   30.70
   9   1   1  800.72   28.80
  -9   0  -1   26.70    4.20
   9   0  -1   28.00    5.10
   9   0  -1   26.20    3.70
  -9   0   1   29.60    4.90
   9   0   1   25.30    4.40
   0  -9   1   32.40    5.50
   9   0   1   25.50    3.70
  -1  -9  -1  154.18    9.70
   9  -1  -1  136.09    9.80
  -9   1  -1  134.59    8.50
   9  -1   1  138.89    9.20
   1   9   1  152.88   10.50
   9  -1   1  127.79    7.20
  -1  -9   1  172.98   10.50
  -9   1   1  130.69    9.10
   9  -2  -1  438.66   20.00
  -9   2  -1  444.56   18.40
   9  -2   1  447.26   17.00
  -2  -9   1  433.76   20.30
   9  -2   1  444.96   19.40
  -9   2   1  475.45   19.80
  -9   3  -1    8.10    2.70
   9  -3  -1    6.80    3.50
   9  -3   1    5.10    3.10
  -9   3   1    3.40    2.40
   9  -3   1    6.80    2.30
  -3  -9   1   12.70    5.40
  -3  -9   1   11.90    5.50
  -9   4  -1  215.68   10.90
   4   9  -1  203.88    8.40
   9  -4  -1  224.58   12.80
   9  -4   1  211.58   11.60
  -9   4   1  227.28   11.80
  -4  -9   1  176.08   13.30
   9  -4   1  212.28    9.50
  -9   5  -1   77.19    6.60
  -5  -9  -1   79.89    8.30
   9  -5  -1   73.59    7.60
  -5  -9  -1   75.99    9.30
  -9   5   1   80.39    7.20
   5   9   1   87.39    6.90
  -5  -9   1   92.89    8.90
   9  -5   1   78.89    5.60
   9  -5   1   75.09    7.10
   9  -6  -1   47.60    6.90
  -6  -9  -1   37.00    7.20
  -9   6  -1   33.80    5.60
   6   9  -1   50.89    7.20
  -6  -9  -1   63.89    8.40
   9  -6   1   55.99    5.10
   6   9   1   38.80    5.70
  -9   6   1   44.90    6.00
   9  -6   1   39.80    5.90
   7   9   1   52.89    7.40
   8   9  -1   80.99    9.40
   9  -8  -1  105.49    9.60
   8   9  -1   94.49    6.30
  -8  -9  -1  108.99   10.60
  -9   8  -1   97.19    8.20
   8   9   1  105.79   10.00
  -9   8   1  101.29    8.60
   8   9   1   95.69    8.10
   9  -8   1   90.49    8.40
  -8  -9   1   92.09   10.50
   9  -9  -1  471.95   22.00
   9   9  -1  438.06   22.40
   9   9  -1  480.05   18.10
  -9   9  -1  499.65   23.40
  -9  -9  -1  457.15   22.70
   9   9   1  471.85   20.00
   9  -9   1  468.95   21.20
   9   9   1  456.75   22.60
  -9  -9   1  417.46   22.80
  -9   9   1  463.45   21.30
   9 -10  -1   62.29    8.00
  10   9  -1   60.29    8.80
  10   9  -1   57.39    6.10
 -10  -9   1   72.19    9.60
  10   9   1   63.09    7.60
  -9  10   1   59.59    7.80
  10   8  -1   22.60    3.70
 -10  -8  -1   20.90    5.40
   8 -10  -1   23.70    5.00
  -8  10  -1   20.40    6.20
  10   8  -1   19.60    5.40
   8 -10   1   28.20    5.50
  10   8   1   20.80    5.20
  -8  10   1   32.10    6.00
 -10  -8   1   25.80    6.30
  10   7  -1   19.90    3.60
  10   7  -1   14.80    4.90
   7 -10  -1   18.20    4.80
  -7  10  -1   14.50    4.40
 -10  -7  -1   13.00    4.50
   7 -10   1   15.40    4.40
  -7  10   1   16.90    4.70
  10   7   1   14.50    4.90
 -10  -7   1   15.80    5.00
  -6  10  -1   18.40    4.40
  10   6  -1   18.80    5.60
 -10  -6  -1   19.60    4.80
  10   6   1   19.30    5.10
 -10  -6   1   17.20    5.00
  10   6   1   21.50    4.10
   6 -10   1   18.80    4.40
  -5  10  -1  469.95   21.00
  10   5  -1  478.05   18.40
 -10  -5  -1  470.25   21.70
  10   5  -1  461.45   22.60
   5 -10  -1  450.55   20.50
  -5  10   1  463.25   21.10
  10   5   1  485.95   19.50
   5 -10   1  464.15   20.20
  10   5   1  460.75   21.90
 -10  -5   1  464.85   22.40
   4 -10  -1    4.90    3.50
 -10  -4  -1   11.80    4.00
  10   4  -1   10.40    2.80
  -4  10  -1    9.10    3.90
  10   4  -1    7.60    3.70
 -10  -4   1   15.00    4.70
  10   4   1    8.40    2.90
  10   4   1    4.00    3.50
  -4  10   1    4.50    3.50
   4 -10   1    6.40    3.30
  10   3  -1   51.59    5.00
 -10  -3  -1   52.49    6.50
  -3  10  -1   56.49    6.80
  10   3  -1   41.80    6.90
   3 -10  -1   53.89    6.40
  -3  10   1   53.89    7.00
  10   3   1   47.90    5.30
  10   3   1   60.29    7.00
 -10  -3   1   49.50    7.30
   3 -10   1   71.69    7.10
  10   2  -1   -2.50    2.20
  10   2  -1    3.50    3.30
 -10  -2  -1    2.10    2.50
  -2  10  -1    3.50    2.90
   2 -10  -1    1.50    2.80
  -2  10   1    1.20    2.90
   2 -10   1    2.50    3.40
  10   2   1    1.30    2.80
 -10  -2   1    6.00    3.10
  10   2   1    0.40    2.00
  10   1  -1  331.77   17.30
   1 -10  -1  329.67   16.00
 -10  -1  -1  348.77   16.20
  10   1  -1  327.67   14.30
 -10  -1   1  338.67   16.80
   1 -10   1  349.77   16.30
  10   1   1  353.66   16.90
  -1  10   1  348.47   17.10
  10   1   1  330.67   14.30
  10   0  -1    5.30    3.00
  10   0  -1   -2.10    1.90
 -10   0  -1   -1.90    2.00
   0 -10   1   -0.70    3.00
 -10   0   1    0.70    2.50
  10   0   1    0.10    2.60
  10   0   1    0.70    1.90
 -10   1  -1  193.48   10.80
  -1 -10  -1  210.78   12.80
  -1 -10  -1  193.88   11.60
  10  -1  -1  202.98   12.40
  10  -1   1  190.38   11.50
 -10   1   1  198.78   11.70
  -1 -10   1  179.88   12.00
  -1 -10   1  174.78   12.10
  10  -1   1  194.28    9.30
  -2 -10  -1   31.00    6.00
 -10   2  -1   23.00    4.00
  10  -2  -1   26.20    5.40
  -2 -10   1   27.70    6.20
  10  -2   1   24.30    4.60
 -10   2   1   21.00    4.50
  10  -2   1   19.80    3.10
  -2 -10   1   29.50    6.50
  10  -3  -1   42.90    7.40
 -10   3  -1   42.70    5.30
  -3 -10  -1   44.00    7.20
  -3 -10  -1   52.49    8.50
 -10   3   1   37.30    5.80
  10  -3   1   37.10    4.30
  10  -3   1   39.40    6.10
 -10   4  -1   74.39    6.80
   4  10  -1   82.59    4.60
  -4 -10  -1   76.19    9.90
  -4 -10  -1   73.99    9.30
  10  -4  -1   79.19    8.60
  -4 -10   1   77.39   10.30
  10  -4   1   74.39    5.60
  10  -4   1   78.29    7.90
  -4 -10   1   82.29   10.70
 -10   4   1   82.39    7.40
 -10   5  -1   97.99    8.40
  10  -5   1  111.89    9.30
  -5 -10   1  159.18   11.90
  10  -6  -1   21.50    5.30
 -10   6  -1   18.10    4.10
  -6 -10  -1   22.40    6.20
   6  10   1   23.10    4.50
  10  -6   1   17.90    3.50
  10  -6   1   18.40    4.70
 -10   7  -1   11.20    3.60
  10  -7  -1   11.70    4.30
   7  10  -1   17.70    5.10
  -7 -10  -1    9.80    5.10
  -7 -10   1   15.80    5.30
  10  -7   1    8.10    4.00
 -10   7   1   14.20    4.20
   7  10   1    6.80    3.20
  10  -8  -1    6.40    3.40
   8  10  -1    0.40    3.50
  -8 -10  -1    5.90    4.60
   8  10  -1    0.30    2.30
  -8 -10   1    5.90    4.70
 -10   8   1    7.70    3.40
   8  10   1    8.40    3.90
  10  -9  -1   18.30    5.30
   9  10  -1   16.40    3.10
 -10   9   1   18.80    4.70
   9  10   1   13.90    4.40
  -9 -10   1   14.00    5.50
  11  10  -1   60.29    5.90
 -11 -10   1   57.89    9.60
  11  10   1   84.99    8.10
  11   9  -1  158.78    9.00
  11   9   1  151.88   10.20
 -11  -9   1  153.88   13.00
  -9  11   1  148.29   11.50
  11   8  -1  167.58   13.20
   8 -11  -1  176.08   12.10
  11   8  -1  180.18    9.80
 -11  -8   1  170.08   13.50
  11   8   1  185.88   11.00
  -8  11   1  178.58   12.50
 -11  -7  -1  303.27   20.10
  11   7  -1  292.07   13.40
  11   7  -1  275.47   17.20
   7 -11  -1  281.27   15.90
 -11  -7   1  301.67   17.40
  11   7   1  296.47   14.60
  -7  11   1  277.87   16.00
   7 -11   1  289.57   16.30
  11   7   1  282.27   16.90
  11   6  -1   16.80    3.50
 -11  -6  -1   14.90    4.70
   6 -11  -1   14.80    4.20
  11   6  -1   17.10    5.20
  -6  11  -1   14.80    4.40
  11   6   1   14.40    5.10
  11   6   1   13.90    3.90
   6 -11   1   15.20    4.30
 -11  -6   1   20.30    5.70
  -6  11   1   13.60    4.60
  11   5  -1    2.40    3.80
 -11  -5  -1    1.50    3.40
  11   5  -1    0.80    2.40
  -5  11  -1    1.00    3.60
   5 -11  -1    2.00    3.20
   5 -11   1    1.70    3.10
  11   5   1    4.60    2.70
  11   5   1    7.70    3.90
 -11  -5   1    0.70    3.60
  -5  11   1    0.00    3.10
 -11  -4  -1   51.89    7.30
  11   4  -1   48.80    8.00
  11   4  -1   55.69    5.60
   4 -11  -1   66.49    7.40
  11   4   1   52.49    7.90
 -11  -4   1   57.19    8.60
   4 -11   1   44.20    6.90
  11   4   1   61.09    6.10
  -4  11   1   69.79    8.00
  11   3  -1 1639.54   54.29
  -3  11  -1 1552.74   57.19
  11   3  -1 1542.55   58.49
   3 -11  -1 1578.44   56.29
 -11  -3  -1 1559.14   57.09
  11   3   1 1658.13   54.59
   3 -11   1 1566.74   56.09
  -3  11   1 1530.25   57.09
  11   3   1 1598.74   57.99
 -11  -3   1 1611.44   58.29
 -11  -2  -1   19.70    4.60
  11   2  -1   18.90    5.60
   2 -11  -1   11.70    4.40
 -11  -2   1   11.80    4.80
  -2  11   1   15.40    5.00
   2 -11   1   15.40    5.20
  11   2   1   16.90    4.70
 -11  -1  -1 1092.89   41.10
  11   1  -1 1043.70   38.90
   1 -11  -1 1080.79   40.90
  11   1  -1 1124.49   43.00
 -11  -1   1 1114.29   42.40
  11   1   1 1099.49   42.10
  11   1   1 1100.09   38.90
  -1  11   1 1131.39   42.70
   1 -11   1 1161.08   41.40
  11   0  -1  152.48   11.30
  11   0  -1  131.29    8.50
 -11   0  -1  141.99    9.90
 -11   0   1  156.98   11.10
  11   0   1  149.99    8.40
  11   0   1  162.88   11.00
   0 -11   1  147.59   11.70
   0 -11   1  141.39   11.60
  11  -1  -1  368.06   19.40
 -11   1  -1  356.46   17.40
  11  -1   1  355.16   15.60
  -1 -11   1  426.76   19.30
  11  -1   1  363.26   18.60
 -11   1   1  368.26   18.50
  -1 -11   1  451.25   20.10
 -11   2  -1  320.87   15.50
  11  -2  -1  327.67   17.60
  -2 -11  -1  350.76   18.10
  -2 -11  -1  330.97   16.90
  11  -2   1  330.97   14.00
 -11   2   1  333.17   16.80
  -2 -11   1  306.77   18.20
  -2 -11   1  284.97   17.50
  11  -2   1  335.97   17.10
   3  11  -1 1407.26   48.10
 -11   3  -1 1467.35   51.89
  11  -3  -1 1477.95   54.59
  -3 -11   1 1528.15   54.69
  11  -3   1 1441.86   49.99
  11  -3   1 1494.25   53.79
 -11   3   1 1464.15   53.19
  -3 -11   1 1508.95   55.19
   4  11  -1   79.89    4.90
  11  -4  -1  110.19   10.20
 -11   5  -1   23.40    4.60
   5  11  -1   22.60    3.20
  11  -5  -1   26.80    6.00
  -5 -11   1   19.40    5.90
  11  -5   1   25.20    5.50
  11  -5   1   29.10    4.10
   5  11   1   31.40    4.90
 -11   5   1   23.60    5.20
  -5 -11   1   19.10    8.20
 -11   6  -1  110.89    8.60
  11  -6  -1  102.19   10.80
  -6 -11  -1   96.39   10.80
   6  11  -1  127.29    6.30
   6  11   1  103.29    8.70
  -6 -11   1  116.49   11.10
  11  -6   1  101.49    7.50
 -11   6   1  106.89    9.30
  11  -6   1  108.69    9.60
  -7 -11  -1  820.22   35.10
   7  11  -1  822.32   28.50
  11  -7  -1  801.72   33.80
   7  11   1  812.32   31.00
 -11   7   1  812.12   32.80
  -7 -11   1  778.22   35.00
  11  -7   1  826.42   34.90
  11  -8  -1  165.18   12.70
   8  11  -1  169.88    8.90
 -11   8   1  177.28   12.10
   8  11   1  216.88   11.80
  -8 -11   1  179.28   14.30
   9  11  -1  190.98    9.70
  -9 -11   1  200.28   15.40
 -11   9   1  208.78   13.20
   9  11   1  191.08   11.80
  10  11  -1   42.80    5.10
  10  11   1   35.80    5.70
 -10 -11   1   28.70    6.90
  11  11  -1   40.90    5.30
 -11 -11   1   34.90   11.80
  11  11   1   45.70    6.60
  12  11  -1   -2.00    2.80
  12  11   1   -3.00    3.00
  12  10  -1   42.60    5.80
  12  10   1   38.20    6.00
  12   9  -1    7.70    3.50
  12   9   1    4.70    3.90
 -12  -9   1   14.00    5.60
  12   8  -1   -0.60    2.60
  -8  12   1    0.10    3.10
  12   8   1   -0.30    2.80
 -12  -8   1    0.20    3.50
  12   7  -1   19.60    6.00
  12   7  -1   14.00    3.70
   7 -12  -1   20.90    5.10
 -12  -7   1   25.50    6.10
  -7  12   1   12.90    4.70
  12   7   1   18.60    4.20
  12   6  -1   88.79   10.10
  12   6  -1   89.49    7.30
  12   6   1   92.69    7.90
 -12  -6   1  105.19   10.60
  12   5  -1  159.38    9.90
   5 -12  -1  157.48   11.50
  -5  12  -1  169.78   16.10
  12   5  -1  165.48   13.20
  12   5   1  160.78   12.90
   5 -12   1  156.68   11.20
  -5  12   1  166.48   12.00
 -12  -5   1  171.38   13.40
  12   5   1  152.68    9.90
  12   4  -1   28.30    4.40
   4 -12  -1   23.40    5.20
 -12  -4  -1   28.10    5.50
  12   4  -1   34.00    6.90
  -4  12  -1   16.40    5.30
   4 -12   1   20.20    5.00
  12   4   1   22.00    4.30
  12   4   1   25.80    6.00
 -12  -4   1   31.90    6.10
  -4  12   1   25.50    5.90
  12   3  -1   83.79    7.20
 -12  -3  -1   83.79    8.50
   3 -12  -1   89.69    8.30
  12   3  -1   85.79    9.40
  -3  12  -1   84.29    9.10
  12   3   1   86.19    9.50
  12   3   1  102.39    7.50
  -3  12   1   80.39    9.70
 -12  -3   1   99.69    9.60
   3 -12   1   91.99    9.20
   2 -12  -1    1.90    3.40
  12   2  -1    6.50    4.00
  12   2  -1    9.80    3.30
 -12  -2  -1    5.40    3.40
 -12  -2   1    5.30    3.80
   2 -12   1    4.80    4.60
  12   2   1    4.30    2.90
  12   2   1    3.40    3.30
  -2  12   1    3.50    4.30
  12   1  -1  112.29   10.70
  12   1  -1  115.39    8.30
   1 -12  -1  132.69   10.50
 -12  -1  -1  110.39    9.10
 -12  -1   1  113.99   10.20
  12   1   1  113.09    7.80
  -1  12   1  121.99   11.30
  12   1   1  114.99   10.40
   1 -12   1  144.69   10.90
  12   0  -1   28.10    6.00
 -12   0  -1   30.50    5.30
   0  12   1   52.89    8.60
  12   0   1   25.50    5.40
 -12   0   1   24.40    5.20
   0 -12   1   33.60    6.40
   0 -12   1   34.50    6.70
  12   0   1   31.90    4.40
  -1 -12  -1  112.59    9.80
  -1 -12  -1  104.19   10.70
  12  -1  -1   94.09   10.30
 -12   1  -1   96.99    8.50
  -1 -12   1  112.69   10.50
 -12   1   1   98.29    9.30
  12  -1   1  100.69    9.50
  12  -1   1   98.09    7.00
  -1 -12   1   96.99    9.70
  -2 -12  -1   -1.00    3.80
 -12   2  -1   -0.20    2.50
  -2 -12  -1    1.20    3.70
  12  -2  -1   -1.90    3.10
 -12   2   1   -2.10    2.70
  12  -2   1   -0.10    2.20
  12  -2   1    0.20    3.20
  -2 -12   1   -0.40    4.10
  -2 -12   1   -0.50    4.50
  12  -3  -1   68.49    8.80
  -3 -12  -1   73.19   14.50
  -3 -12  -1   70.79   10.50
 -12   3  -1   76.29    7.30
 -12   3   1   68.79    8.10
  12  -3   1   76.89    8.50
  12  -3   1   80.99    6.30
  12  -4  -1   17.70    5.50
 -12   4  -1   14.30    4.40
  -4 -12  -1   40.10    8.50
   4  12  -1   20.80    3.00
  12  -4   1   21.20    4.00
  12  -4   1   14.30    5.00
  -4 -12   1   29.60    7.60
 -12   4   1   12.70    4.40
  -4 -12   1   25.20    8.50
   5  12  -1  272.17   11.40
  -5 -12  -1  326.77   18.90
  12  -5  -1  283.77   17.10
  -5 -12   1  296.77   18.90
  12  -5   1  272.77   16.70
  -5 -12   1  264.97   17.60
   5  12   1  294.77   14.60
  12  -5   1  288.07   13.40
 -12   5   1  282.57   15.70
  12  -6  -1   14.90    5.80
   6  12  -1   18.30    2.90
  -6 -12  -1   12.00    5.10
  -6 -12   1   17.50    5.60
 -12   6   1   12.10    4.60
  12  -6   1   12.40    3.80
   6  12   1   14.20    4.30
  12  -7  -1   69.49    9.70
   7  12  -1   69.19    5.30
 -12   7   1   70.89    8.10
  -7 -12   1   71.19   10.60
   7  12   1   71.29    7.40
   8  12  -1   19.70    3.20
  -8 -12   1   27.10    7.10
   8  12   1   23.00    5.00
   9  12  -1   75.59    6.00
  -9 -12   1   88.99   11.80
   9  12   1   61.79    8.40
  10  12  -1   -1.60    2.20
 -10 -12   1    0.40    4.10
  10  12   1    4.40    3.60
  11  12  -1   65.59    6.30
  11  12   1   74.49    8.10
  12  12  -1   -0.50    2.90
  12  12   1    4.00    3.70
  13  12  -1    2.10    3.50
  13  12   1    7.40    4.00
  13  11  -1  157.28   10.10
  13  11   1  156.48   11.10
  13  10  -1    6.40    3.40
  13  10   1    1.40    3.40
  13   9  -1  263.67   13.40
  13   9   1  265.47   14.30
  13   8  -1   65.19    6.90
  13   8   1   69.79    7.60
  13   7  -1    1.50    3.40
  13   7   1    0.90    3.50
 -13  -7   1    5.60    4.40
  -7  13   1    4.90    5.00
  13   6  -1   11.40    5.20
  13   6  -1   11.00    3.60
   6 -13  -1   21.90    5.30
 -13  -6   1   16.50    5.40
  -6  13   1   13.20    4.90
  13   5  -1  131.69   12.00
   5 -13  -1  118.89   10.10
  13   5  -1  121.09    8.50
  -5  13   1  113.39   10.70
 -13  -5   1  125.89   11.50
  13   5   1  116.09    8.60
  13   4  -1  260.17   13.00
   4 -13  -1  245.98   14.50
  13   4  -1  264.87   16.80
  13   4   1  257.37   13.00
  -4  13   1  244.88   15.90
 -13  -4   1  243.48   16.00
  13   3  -1   -0.30    3.00
  13   3  -1   -1.40    3.20
   3 -13  -1   -1.30    2.80
  13   3   1    0.90    2.70
 -13  -3   1   -2.10    3.00
  -3  13   1   -1.10    3.50
  13   2  -1   88.49    9.90
   2 -13  -1   85.49    9.20
  13   2  -1   79.69    7.40
 -13  -2   1   85.89    9.60
  13   2   1   83.29   14.60
   2 -13   1   91.39   11.90
  13   2   1   76.69    7.00
  -2  13   1  104.19   10.90
  13   1  -1   18.50    4.10
  13   1  -1   15.30    5.70
   1 -13  -1   13.60    5.00
  13   1   1   17.10    5.70
 -13  -1   1   20.80    5.40
  -1  13   1   12.90    6.30
  13   1   1   13.20    3.60
   0  13   1   69.59   10.40
  -1 -13  -1  900.01   36.50
  13  -1  -1  897.71   37.10
  13  -1   1  867.01   37.20
  -1 -13   1  871.91   35.60
  13  -1   1  863.31   32.10
 -13   1   1  909.41   36.10
  -1 -13   1  840.02   35.70
  13  -2  -1   39.30    7.20
  -2 -13   1   44.20    8.40
  13  -2   1   37.80    5.40
  -2 -13   1   44.90    9.00
 -13   2   1   38.00    7.00
  13  -3  -1 1071.89   43.20
  -3 -13  -1 1017.40   42.10
  13  -3   1 1055.79   38.20
 -13   3   1 1108.79   41.70
  -3 -13   1 1082.39   43.80
  -3 -13   1 1068.69   42.60
  -4 -13  -1  110.99   13.20
  -5 -13  -1   18.80    7.00
  13  -5  -1   18.00    6.30
   5  13   1    9.50    3.90
  -5 -13   1   10.40    5.20
 -13   5   1   17.10    4.50
   6  13   1   -2.30    3.10
  13  -6   1   -1.50    2.80
  -6 -13   1   -0.10    3.90
   7  13  -1  664.13   28.60
  -7 -13   1  698.13   32.70
   7  13   1  745.03   28.30
  -8 -13   1   10.10    5.60
   8  13   1    4.70    3.70
   9  13  -1  407.66   17.40
  -9 -13   1  420.86   24.00
   9  13   1  432.06   19.60
  10  13  -1    3.90    2.90
  10  13   1    4.80    3.80
  11  13  -1   39.10    5.80
  11  13   1   36.20    6.40
  12  13  -1   91.09    8.10
  12  13   1   90.69    9.10
  13  13  -1  214.78   13.00
  13  13   1  214.98   13.60
  14  13  -1   92.99   11.70
  14  13   1  116.39   10.20
  14  12  -1   -4.10    3.40
  14  12   1    3.90    3.90
  14  11  -1   55.89    7.50
  14  11   1   52.09    7.20
  14  10  -1    7.30    3.80
  14  10   1    6.80    3.90
  14   9  -1   14.60    4.20
  14   9   1   13.40    4.50
  14   8  -1   25.20    4.90
  14   7   1   42.70    6.00
  14   6  -1    9.50    3.60
  14   6   1    8.20    3.60
  14   5  -1   27.70    5.10
  14   5   1   24.60    4.70
  -5  14   1   29.70    7.30
  14   4  -1    4.70    3.40
  -4  14   1   11.10    4.90
 -14  -4   1    5.00    4.10
  14   4   1    7.20    3.40
  14   3  -1   13.00    4.40
  14   3   1   18.10    3.90
  -3  14   1   14.50    5.60
 -14  -3   1   17.40    5.20
  14   2  -1    4.30    4.30
  14   2  -1   -0.20    3.20
 -14  -2   1    0.40    3.50
  14   2   1    1.70    3.00
  -2  14   1    4.80    5.20
  14   1  -1   -0.80    3.10
  14   1  -1    1.60    4.20
 -14  -1   1    4.60    3.90
  14   1   1    4.90    2.90
  -1  14   1   -0.60    4.40
   0 -14  -1    8.90    5.80
  14   0  -1    4.60    4.70
 -14   0   1    2.40    3.90
   0 -14   1    3.70    4.70
  14   0   1    2.30    2.90
  14  -1  -1   99.59   12.70
  -1 -14  -1  112.19   12.40
 -14   1   1  108.89   10.50
  14  -1   1  108.19    7.80
  -1 -14   1  111.49   11.00
  -2 -14  -1   -0.40    4.70
  -2 -14   1    0.00    4.90
 -14   2   1   -2.40    3.00
  14  -2   1   -0.10    2.50
  -3 -14  -1   26.80   10.10
  -3 -14   1   23.00    7.80
  14  -4   1   81.29    7.50
  -4 -14   1   80.79   12.20
   4  14   1   84.59    8.00
  14  -5   1  264.67   13.70
  -5 -14   1  281.77   18.40
   5  14   1  262.57   14.20
   6  14   1   81.19    8.60
   7  14   1   19.00    4.60
  -7 -14   1   18.10    6.40
  -8 -14   1   20.60    6.90
   8  14   1    0.80    3.60
   9  14   1   53.29    8.00
  11  14   1   43.50    6.90
  12  14   1   13.70    4.80
  13  14   1    7.10    4.50
  14  14   1    2.90    4.20
  15  14   1   61.69    8.70
  15  13   1   -1.10    4.00
  15  12  -1    1.20    4.10
  15  12   1    3.50    4.00
  15  11  -1  306.57   16.30
  15  11   1  313.37   16.60
  15  10  -1   51.39    7.70
  15  10   1   63.29    8.10
  15   9  -1  353.66   17.40
  15   9   1  349.96   17.50
  15   8  -1   -2.20    3.60
  15   8   1   -3.10    3.20
  15   7  -1    1.50    3.40
  15   7   1    0.20    3.40
  15   6  -1   47.60    6.50
  15   6   1   55.59    7.10
  15   5  -1  216.18   12.70
  15   5   1  224.08   12.60
  15   4  -1   40.80    6.00
  15   4   1   43.90    6.50
  15   3  -1  623.24   26.10
  15   3   1  625.14   25.50
  -3  15   1  656.33   36.20
  15   2  -1   -0.80    3.10
  15   2   1    0.60    3.10
  -2  15   1   -3.20    4.10
  15   1   1   28.50    4.70
  -1  15   1   43.00    8.30
   1 -15   1   33.00    7.70
  15   0   1  167.28   10.30
   0 -15   1  184.38   14.70
  15  -1   1  146.29    9.60
  -1 -15   1  162.08   14.30
  15  -2   1   79.19    7.50
  -2 -15   1   98.09   13.20
  -3 -15   1    3.20    6.90
  15  -3   1    8.20    3.40
   4  15   1    6.50    4.10
  15  -4   1    0.20    3.20
  -4 -15   1   25.60    7.60
   5  15   1   12.50    4.40
  -5 -15   1   11.90    6.00
  15  -5   1    9.40    4.00
   6  15   1   33.30    5.80
  -6 -15   1   36.90    8.00
   7  15   1   85.99    8.60
   8  15   1  182.28   12.30
   9  15   1   33.40    6.00
  10  15   1   43.90    7.10
  11  15   1  230.48   14.10
  12  15   1   -2.40    3.60
  13  15   1  540.55   24.50
  14  15   1    2.90    4.40
  15  15   1    3.20    4.50
  16  15   1    0.40    4.30
  16  14   1   -1.90    4.00
  16  13   1    4.90    4.50
  16  12  -1   21.20    5.50
  16  12   1   21.90    5.80
  16  11  -1   11.90    4.90
  16  11   1   12.10    4.90
  16  10  -1    5.40    4.40
  16  10   1   10.00    4.40
  16   9  -1   72.19    8.90
  16   9   1   91.79    9.00
  16   8  -1   57.69    8.20
  16   8   1   87.29    8.90
  16   7  -1  163.38   11.50
  16   7   1  172.78   11.40
  16   5  -1    9.60    4.30
  16   5   1   10.90    4.20
  16   4  -1   10.20    4.20
  16   4   1    9.70    3.80
  16   3  -1    7.20    4.10
  16   3   1    6.70    3.40
  16   2  -1   -5.20    3.20
  16   2   1    7.40    3.40
   1 -16   1   43.90    8.60
  16   1   1   47.40    6.40
   0 -16   1   14.50    5.60
  16   0   1    5.60    3.80
  16  -1   1   -0.50    3.10
  -1 -16   1    4.80    5.20
  16  -2   1    1.40    3.20
  -2 -16   1   -4.10    5.50
  -3 -16   1   53.99   11.90
  16  -3   1   29.50    5.50
  16  -4   1    2.80    3.70
   4  16   1   -0.40    4.50
  -4 -16   1    7.40    6.50
  -5 -16   1   -1.20    4.90
   5  16   1   -2.30    3.60
  16  -5   1   -0.40    3.40
   6  16   1    1.90    3.60
   7  16   1   -0.60    4.30
   8  16   1   25.40    7.20
   9  16   1   12.60    6.50
  17  15   1  167.98   14.50
  17  14   1   13.10    5.90
  17  13   1   22.30    6.20
  17  12  -1   10.50    5.20
  17  12   1   10.30    5.00
  17  11  -1   12.50    5.10
  17  11   1   13.50    5.20
  17  10  -1   71.39    9.30
  17  10   1   72.79    9.00
  17   9  -1    3.50    4.30
  17   9   1    2.20    4.00
  17   8  -1   13.70    5.40
  17   8   1   20.30    5.40
  17   7  -1    6.50    4.20
  17   7   1    1.90    3.90
  17   6  -1   65.39    8.70
  17   6   1   63.89    7.90
  17   5  -1   87.49    9.30
  17   5   1   87.49    8.60
  17   4  -1   64.89    8.70
  17   4   1   87.59    8.40
  17   3  -1   26.20    5.80
  17   3   1   16.20    4.70
  17   2   1   -0.60    3.60
   2 -17   1    2.20    4.90
  17   1   1  138.79   10.20
   0 -17   1   -4.80    4.40
  17   0   1   -3.70    3.10
  17  -1   1  597.74   25.40
  -1 -17   1  605.34   31.20
  17  -2   1    2.40    3.50
  -2 -17   1    7.90    7.70
  17  -3   1  159.98   11.50
  17  -4   1   -1.90    3.30
  18  14   1   -0.90    4.60
  18  13   1   40.50    7.50
  18  12  -1    7.40    5.30
  18  12   1    8.00    5.20
  18  11  -1   15.00    5.80
  18  11   1   17.30    5.60
  18  10  -1   10.60    5.40
  18  10   1    7.60    4.70
  18   9  -1   -1.40    4.50
  18   9   1    0.40    3.90
  18   8  -1    0.90    4.80
  18   8   1    4.10    4.40
  18   7  -1    5.40    4.70
  18   7   1    3.20    4.00
  18   6  -1   26.50    6.10
  18   6   1   23.90    5.70
  18   5  -1   -0.90    4.30
  18   5   1    1.00    4.00
  18   4  -1   -1.20    4.10
  18   4   1    2.20    3.90
  18   3   1    4.50    4.10
   1 -18   1   27.90    7.70
  18   1   1   28.00    5.70
  18   0   1   -2.80    3.50
   0 -18   1    3.50    6.90
  18  -1   1    8.30    4.40
  18  -2   1   11.60    4.70
  18  -3   1  122.19   10.50
  18  -4   1   24.60    5.70
  19  12  -1   -2.10    5.40
  19  12   1    2.80    5.10
  19  11  -1  201.88   15.10
  19  11   1  181.68   13.90
  19  10  -1   48.20    8.20
  19  10   1   44.60    7.70
  19   9  -1  225.58   16.00
  19   9   1  214.58   14.50
  19   8  -1    3.40    5.20
  19   8   1    7.60    4.60
  19   7  -1   11.90    5.50
  19   7   1    8.70    4.80
  19   6  -1   55.69    8.50
  19   6   1   67.39    9.10
  19   5   1  155.88   12.40
  19   4   1   82.09    9.70
  19   3   1  108.89   10.60
  19   2   1   20.10    5.50
  19   1   1   -0.90    4.00
  19   0   1  106.59   10.10
  19  -1   1    7.50    4.40
  19  -2   1    1.40    3.80
  19  -3   1   61.99    8.70
  20  11  -1    1.00    5.40
  20  11   1   -1.60    4.70
  20  10  -1    0.90    5.50
  20  10   1   -2.40    4.40
  20   9  -1   50.49    9.20
  20   8  -1    2.30    5.40
  20   8   1    7.20    5.20
  20   7   1   88.69   10.50
  20   6   1   -0.50    4.20
  20   5   1    3.40    4.60
  20   4   1   -3.20    4.10
  20   3   1    6.70    4.70
  20   2   1   10.10    5.10
  20   1   1    6.40    4.70
  20   0   1   -0.30    4.40
  20  -1   1   -1.00    4.60
  20  -2   1   -0.80    4.10
  20  -3   1    2.10    4.40
  21   9   1  117.79   12.20
  21   8   1    3.10    5.00
  21   7   1   28.70    6.80
  21   6   1    7.40    5.30
  21   5   1  354.56   20.00
  21   4   1   -1.10    4.60
  21   3   1   12.20    5.70
  21   2   1   16.20    5.90
  21   1   1  192.28   14.30
  21   0   1   50.39    8.30
  21  -1   1  175.98   14.00
  21  -2   1   10.70    5.80
  22   6   1   26.20    7.60
  22   5   1    3.20    5.20
  22   4   1   -2.60    4.60
  22   3   1   76.19   10.60
  22   2   1    7.10    5.60
  22   1   1   19.10    6.50
  22   0   1   -2.10    5.00
  22  -1   1   28.30    7.40
   1  -2  -2 1093.49   36.20
   2   1  -2 1083.19   36.60
  -1   2   2 1079.79   36.10
   2   0  -2  230.58    9.50
  -2   0   2  213.68    9.40
   0   2   2  251.17    9.10
   2  -1  -2 1018.80   34.90
  -2   1   2 1048.40   34.90
   2  -2  -2   97.49    5.50
   2   2  -2   85.59    5.30
  -2   2   2   92.89    5.10
  -2  -2   2   78.49    5.40
   2  -3  -2  212.18    9.50
   3   2  -2  218.38   10.00
  -2   3   2  213.08    9.30
  -3  -2   2  213.48    9.80
   1  -3  -2 1137.69   35.70
   3   1  -2 1019.10   36.20
  -3  -1   2 1011.60   36.30
  -1   3   2 1058.99   35.60
   3   0  -2   85.29    5.60
   0  -3  -2   79.49    4.80
   0   3   2   77.99    4.90
  -3   0   2   90.09    5.50
  -1  -3  -2   43.60    3.50
   3  -1  -2   47.10    4.00
  -3   1   2   45.40    3.90
   1   3   2   44.70    4.10
   3  -2  -2   74.39    5.20
   2   3  -2   65.99    4.80
  -2  -3  -2   67.59    4.80
  -2  -3  -2   70.49    4.20
   2   3   2   72.99    4.90
  -3   2   2   75.49    4.80
  -2  -3   2   68.09    5.00
   3   3  -2 1694.63   56.39
   3  -3  -2 1848.42   56.39
  -3  -3  -2 1590.24   55.39
   3  -3   2 1611.94   54.69
  -3  -3   2 1607.14   56.29
   3   3   2 1535.05   55.19
  -3   3   2 1838.22   55.99
   3  -4  -2   82.59    5.90
   4   3  -2   88.29    6.30
  -4  -3   2   94.69    6.70
   4   3   2   97.49    5.70
   3  -4   2  103.29    4.70
  -3   4   2   89.69    5.80
   4   2  -2  246.28   11.10
   2  -4  -2  221.48   10.10
  -2   4   2  216.48    9.90
   2  -4   2  221.48    8.60
  -4  -2   2  230.08   10.80
   4   1  -2  449.86   18.10
   1  -4  -2  459.25   17.20
   1  -4   2  440.26   17.20
  -4  -1   2  448.06   18.10
  -1   4   2  520.05   17.60
   0  -4  -2  401.96   15.00
   4   0  -2  439.66   16.40
  -4   0   2  431.86   16.20
   4   0   2  403.06   15.60
   0  -4   2  340.47   15.10
   0   4   2  379.46   15.20
   4  -1  -2  283.77   12.50
  -4   1   2  307.77   12.50
   4  -1   2  287.87   11.80
  -1  -4   2  269.37   12.00
  -2  -4  -2   37.10    3.40
  -2  -4  -2   43.70    4.00
   4  -2  -2   26.90    4.30
   2   4  -2   42.10    4.30
   2   4   2   28.90    4.30
  -4   2   2   30.70    3.70
  -2  -4   2   38.20    4.00
   4  -2   2   38.60    3.40
   3   4  -2   83.69    5.90
  -3  -4  -2   61.79    5.00
   4  -3  -2   62.19    5.40
  -3  -4  -2   80.49    5.00
   4  -3   2   67.29    4.20
  -4   3   2   69.19    5.40
  -3  -4   2   69.99    5.60
  -4  -4  -2   26.40    3.50
   4   4  -2   33.20    4.40
  -4  -4  -2   31.50    3.90
   4  -4  -2   34.50    4.50
   4  -4   2   30.70    2.70
   4  -4   2   29.80    3.10
   4   4   2   29.00    3.70
  -4   4   2   28.10    3.90
   4  -5  -2  245.08   11.30
   5   4  -2  235.38   11.80
  -5  -4  -2  223.08   10.70
   4  -5   2  226.18    8.60
  -5  -4   2  226.68   11.80
   4  -5   2  225.68    9.70
  -4   5   2  223.48   10.70
   5   4   2  215.58   10.60
  -5  -3  -2  187.28    9.10
   3  -5  -2  204.28    9.70
   5   3  -2  196.48   10.50
  -3   5  -2  180.28    8.60
   3  -5   2  199.98    7.40
  -3   5   2  202.68    9.60
   3  -5   2  190.48    8.70
   5   3   2  199.38    9.40
  -5  -3   2  195.18   10.40
   5   2  -2   98.99    7.00
   2  -5  -2  125.89    6.70
  -5  -2  -2  101.29    5.70
   2  -5   2  104.19    6.00
   5   2   2  109.49    6.80
   2  -5   2  103.89    4.40
  -5  -2   2  102.39    7.00
  -2   5   2  104.99    6.40
   5   2   2  107.99    6.10
   5   1  -2  451.25   18.00
   1  -5  -2  434.26   16.70
  -5  -1   2  437.06   17.80
   5   1   2  437.46   16.40
  -1   5   2  421.26   16.90
   5   1   2  428.56   17.00
   1  -5   2  419.86   16.50
   5   0  -2   14.00    3.30
   0  -5  -2   15.10    2.60
   0   5   2   14.30    3.00
   5   0   2   17.20    3.00
  -5   0   2   14.10    3.00
   5  -1  -2  173.98    9.40
  -1  -5  -2  183.28    8.60
  -1  -5   2  185.18    9.80
   5  -1   2  171.28    8.40
  -5   1   2  172.28    9.20
   1   5   2  209.38    9.60
   5  -2  -2  459.15   17.50
  -2  -5  -2  384.96   15.70
  -2  -5  -2  391.76   16.40
  -5   2   2  425.46   16.80
   2   5   2  407.56   16.80
   5  -2   2  421.46   15.70
  -2  -5   2  413.26   17.00
   5  -3  -2  141.49    8.20
   3   5  -2  134.09    8.00
  -3  -5   2  119.59    7.90
   5  -3   2  126.69    6.30
   5  -4  -2    5.70    2.60
   4   5  -2    8.20    2.60
  -4  -5  -2   12.90    2.80
  -4  -5  -2   11.10    2.70
  -4  -5   2    7.70    2.80
   4   5   2    8.80    2.40
   5  -4   2   11.10    2.20
  -5   4   2    8.30    2.70
   5  -4   2   10.00    1.80
   5   5  -2  107.99    7.60
  -5   5  -2   89.69    5.80
  -5  -5  -2   93.29    6.60
   5  -5  -2   96.69    7.20
  -5  -5  -2   92.59    7.00
   5  -5   2   90.99    5.70
  -5  -5   2  106.69    8.00
   5   5   2   96.99    6.90
   5  -5   2   83.79    4.90
  -5   5   2  105.09    7.10
  -6  -5  -2   46.70    5.20
   5  -6  -2   48.40    5.70
  -5   6  -2   49.90    4.70
   6   5  -2   55.89    6.20
   6   5   2   48.90    5.30
   6   5   2   52.89    5.70
   5  -6   2   46.90    3.20
  -6  -5   2   57.79    6.50
  -5   6   2   46.70    5.30
   5  -6   2   49.90    4.50
   4  -6  -2   70.89    5.90
  -4   6  -2   61.39    5.30
   6   4  -2   71.29    6.70
  -6  -4  -2   69.49    5.90
  -4   6   2   64.79    5.80
   6   4   2   64.49    5.90
   4  -6   2   70.79    3.50
  -6  -4   2   69.69    6.80
   4  -6   2   65.29    5.10
   3  -6  -2  548.35   20.50
  -3   6  -2  501.35   19.40
   6   3  -2  539.15   21.70
  -6  -3  -2  489.95   19.70
  -3   6   2  508.45   20.20
   6   3   2  502.15   20.20
   3  -6   2  522.85   17.20
   6   3   2  506.65   20.30
   3  -6   2  521.55   19.40
  -6  -3   2  510.45   21.30
   2  -6  -2  110.89    6.80
   6   2  -2  107.89    7.70
  -6  -2  -2  109.89    6.30
   6   2   2  108.89    7.00
  -2   6   2  102.09    6.70
  -6  -2   2  109.69    7.80
   6   2   2  107.59    6.80
   2  -6   2  107.59    6.50
   6   1  -2  369.66   16.30
   1  -6  -2  369.36   15.00
   6   1   2  379.16   15.20
  -1   6   2  365.56   15.30
   6   1   2  361.26   14.70
   1  -6   2  360.56   15.00
  -6  -1   2  356.26   16.00
   6   0  -2  162.28    9.60
   0  -6   2  154.38    9.30
  -6   0   2  172.98    9.40
   0  -6   2  160.48    9.00
   6   0   2  171.38    8.10
   6   0   2  175.88    8.60
  -1  -6  -2    7.10    2.40
   6  -1  -2    1.50    2.10
   6  -1   2    6.50    2.00
   1   6   2   12.90    3.00
   6  -1   2    5.30    2.10
  -6   1   2    3.80    2.20
  -1  -6   2    4.20    2.90
   6  -2  -2   37.60    5.20
  -6   2   2   35.00    4.50
   6  -2   2   52.39    4.30
   6  -2   2   35.80    3.90
  -3  -6  -2  113.99    8.10
  -3  -6  -2  112.99    7.30
   6  -3  -2  112.59    8.30
   6  -3   2  126.99    6.40
  -6   3   2  114.69    7.50
  -3  -6   2  130.19    8.30
   6  -3   2  126.79    6.80
  -6   4  -2  235.08   10.10
  -4  -6  -2  212.58   11.10
  -4  -6  -2  210.58   11.50
   4   6  -2  243.18   12.20
   6  -4  -2  238.18   12.20
  -6   4   2  235.48   11.50
   6  -4   2  248.18   10.60
  -4  -6   2  235.28   12.50
   6  -4   2  227.28    9.60
  -5  -6  -2  296.17   13.60
  -5  -6  -2  308.17   14.50
  -6   5  -2  302.17   12.60
   6  -5  -2  306.97   14.60
   5   6  -2  289.07   14.40
   5   6   2  284.77   13.70
  -5  -6   2  294.87   15.10
  -6   5   2  304.77   13.90
   6  -5   2  301.27   11.50
   6  -5   2  293.47   12.60
   6   6  -2   28.30    5.30
  -6  -6  -2   28.30    4.90
  -6  -6  -2   33.10    4.80
  -6   6  -2   34.30    4.30
   6  -6   2   28.60    4.10
   6  -6   2   28.40    2.90
  -6   6   2   39.80    5.30
  -6  -6   2   31.90    5.50
   6   6   2   28.80    4.70
   6   6   2   31.90    5.00
   7   6  -2    8.20    3.70
  -6   7  -2   11.40    3.10
  -7  -6  -2   11.00    3.20
   6  -7  -2    8.30    3.40
  -6   7   2    6.60    3.00
   6  -7   2    6.80    2.00
   7   6   2    9.70    3.40
  -7  -6   2    5.30    3.80
   6  -7   2    5.10    2.60
   7   6   2   14.30    3.40
   7   5  -2  979.70   36.30
  -7  -5  -2  935.41   34.80
  -5   7  -2  916.51   33.60
   5  -7  -2  967.50   34.90
   5  -7   2  954.40   31.10
  -5   7   2  892.21   34.30
   7   5   2  906.91   34.30
   5  -7   2  922.21   33.30
  -7  -5   2  937.91   36.00
   7   5   2  915.31   34.70
  -4   7  -2   98.29    7.00
   4  -7  -2  100.79    7.70
  -7  -4  -2   95.59    7.10
   7   4  -2  110.09    8.70
   4  -7   2  111.89    4.70
  -7  -4   2  124.59    8.80
   7   4   2  103.89    7.40
   7   4   2   99.69    7.40
   4  -7   2   94.79    6.70
  -4   7   2   97.59    7.50
   3  -7  -2 1209.38   41.20
  -3   7  -2 1089.79   40.30
  -7  -3  -2 1147.09   40.80
   7   3  -2 1185.88   42.70
   7   3   2 1150.28   41.00
   7   3   2 1188.38   41.40
  -7  -3   2 1128.09   42.30
  -3   7   2 1131.29   41.10
   3  -7   2 1192.48   40.40
   2  -7  -2   13.30    3.00
  -7  -2  -2   15.40    2.80
   7   2  -2   10.50    3.20
   7   2   2   12.00    3.10
  -7  -2   2   14.50    3.60
   7   2   2   12.60    3.00
  -2   7   2   10.90    3.00
   1  -7  -2   59.39    5.50
   7   1  -2   65.39    6.70
  -7  -1  -2   52.79    4.90
  -1   7   2   61.69    6.10
  -7  -1   2   64.19    6.20
   1  -7   2   77.39    6.10
   7   1   2   57.89    5.50
   7   1   2   49.60    5.20
   0  -7  -2    2.90    2.30
   7   0  -2    3.10    2.50
   7   0   2    3.10    2.10
   7   0   2    3.50    2.10
   0  -7   2   13.80    3.50
  -7   0   2    3.00    2.40
   0   7   2    1.60    2.40
   0  -7   2    7.10    2.70
   7  -1  -2  776.42   30.00
  -7   1  -2  771.72   27.20
  -1  -7  -2  765.82   28.50
   7  -1   2  762.32   27.90
   7  -1   2  765.62   28.30
  -7   1   2  771.52   29.50
  -1  -7   2  849.32   29.50
   1   7   2  745.63   29.30
  -1  -7   2  798.32   29.20
  -2  -7  -2   59.59    6.40
  -2  -7  -2   62.49    5.50
  -7   2  -2   58.69    4.50
   7  -2  -2   65.99    6.30
  -7   2   2   59.99    5.90
   7  -2   2   59.79    5.10
   7  -2   2   55.09    4.90
  -2  -7   2   71.49    7.40
   2   7   2   60.79    6.80
   7  -3  -2   -0.30    2.50
  -7   3  -2   -1.20    1.50
  -3  -7  -2   10.30    3.30
   7  -3   2    1.10    1.60
   7  -3   2   -1.10    1.70
  -7   3   2   -1.00    1.90
   4   7  -2   58.89    6.40
  -4  -7  -2   51.49    6.80
  -7   5  -2   22.70    3.60
   7  -5  -2   31.30    5.50
   5   7  -2   30.90    5.30
   7  -5   2   26.20    3.90
  -7   5   2   24.80    4.30
   7  -5   2   24.90    3.10
  -5  -7   2   28.60    5.20
  -6  -7  -2  333.77   16.50
  -7   6  -2  329.67   14.50
   7  -6  -2  330.27   16.30
   6   7   2  322.67   15.70
   7  -6   2  334.57   12.80
   7  -6   2  333.17   14.70
   6   7   2  329.67   15.60
  -7   6   2  344.87   15.80
  -7   7  -2  278.47   13.20
  -7  -7  -2  267.27   14.60
   7  -7  -2  285.87   14.90
   7   7  -2  283.17   15.30
   7  -7   2  279.27   11.20
   7  -7   2  267.47   13.10
  -7   7   2  269.47   14.00
   7   7   2  286.67   14.70
   7   7   2  271.77   14.00
  -7  -7   2  277.27   15.60
  -7   8  -2  239.78   12.90
   7  -8  -2  245.48   14.10
  -8  -7  -2  244.98   14.00
   8   7   2  253.67   14.00
  -7   8   2  236.18   13.60
   7  -8   2  284.77   10.90
   8   7   2  234.98   13.30
  -8  -7   2  258.27   15.40
   7  -8   2  232.78   12.60
  -8  -6  -2  112.09    8.80
   8   6  -2  108.89    9.60
   6  -8  -2  106.19    8.90
  -6   8  -2   99.69    8.20
   8   6   2  116.69    8.70
   6  -8   2  108.09    7.80
  -6   8   2  110.69    8.70
  -8  -6   2  109.89    9.90
   8   6   2  105.99    8.50
   8   5  -2   92.49    8.70
  -5   8  -2   94.69    7.40
   5  -8  -2   97.69    7.90
  -8  -5  -2   94.39    7.70
  -8  -5   2  100.29    8.90
   8   5   2   95.89    7.90
   5  -8   2   97.29    7.00
   8   5   2   94.49    7.70
  -5   8   2  105.49    8.00
  -4   8  -2   35.20    5.00
   4  -8  -2   33.30    5.50
  -8  -4  -2   38.70    5.20
   8   4  -2   40.00    6.30
  -4   8   2   38.20    5.50
   8   4   2   39.00    5.50
  -8  -4   2   41.60    6.80
   8   4   2   44.10    5.40
   4  -8   2   42.80    5.30
   8   3  -2  597.04   25.20
  -8  -3  -2  573.94   23.20
   3  -8  -2  590.14   23.40
   3  -8   2  597.14   23.00
  -8  -3   2  598.84   25.20
   8   3   2  596.44   23.90
   8   3   2  591.64   23.20
  -3   8   2  571.34   23.60
  -8  -2  -2  212.98   10.70
   8   2  -2  208.18   12.40
   2  -8  -2  220.78   11.30
  -2   8   2  207.88   11.80
   8   2   2  207.18   11.40
   8   2   2  219.98   11.00
  -8  -2   2  214.08   12.40
   2  -8   2  226.88   11.40
   8   1  -2  679.13   27.60
   1  -8  -2  681.73   25.90
  -8  -1  -2  678.73   25.10
   8   1   2  667.33   25.90
  -1   8   2  669.83   26.50
   1  -8   2  654.23   25.70
   8   1   2  693.73   25.50
  -8  -1   2  674.63   27.10
  -8   0  -2   58.59    5.10
   8   0  -2   71.49    7.50
   8   0   2   68.49    5.60
   0  -8   2   63.99    7.10
   0  -8   2   59.79    7.40
  -8   0   2   65.09    6.70
   8   0   2   58.29    5.70
   8  -1  -2   37.10    6.00
  -8   1  -2   38.20    4.50
   8  -1   2   35.80    4.90
  -1  -8   2   55.09    7.70
  -1  -8   2   51.09    8.10
   8  -1   2   36.70    4.50
  -8   1   2   41.20    5.70
   8  -2  -2   16.40    4.00
  -8   2  -2   13.10    2.70
   2   8   2   19.10    4.60
   8  -2   2   15.00    3.30
  -8   2   2   12.30    3.60
   8  -2   2   18.30    3.10
   8  -3  -2  131.09   10.00
  -3  -8  -2  149.69    9.10
  -8   3  -2  142.59    7.80
  -3  -8  -2  138.39    9.90
   8  -3   2  139.09    7.40
  -8   3   2  136.59    9.10
   8  -3   2  133.39    8.50
  -4  -8  -2  167.98   10.50
  -4  -8  -2  203.78   12.20
   8  -4  -2  180.38   11.50
  -8   4  -2  146.69    8.80
  -4  -8   2  174.18   11.20
   8  -4   2  168.88    9.70
  -8   4   2  167.68   10.20
   8  -4   2  172.48    8.20
   8  -5  -2    0.80    2.80
  -5  -8  -2    2.90    2.90
   5   8  -2    5.00    3.20
  -8   5  -2   -0.90    2.20
  -5  -8   2    3.80    3.40
   8  -5   2   -0.90    2.40
   8  -5   2    2.40    1.80
  -8   5   2    1.10    2.70
   8  -6  -2   48.80    7.30
  -8   6  -2   56.29    5.90
   6   8  -2   52.79    8.80
   8  -6   2   49.90    4.40
  -6  -8   2   58.59    8.20
  -8   6   2   55.29    6.70
   8  -6   2   61.89    6.50
  -7  -8  -2   53.19    7.70
  -8   7  -2   47.60    6.20
   8  -7  -2   57.29    7.80
   7   8   2   55.59    7.00
   7   8   2   42.80    7.00
  -8   7   2   47.90    6.80
  -7  -8   2   53.79    8.30
   8  -7   2   42.70    6.10
   8  -7   2   48.80    4.60
  -8   8  -2  193.28   11.20
  -8  -8  -2  183.98   12.50
   8  -8  -2  184.08   12.70
   8  -8   2  196.88    9.50
   8  -8   2  220.78   11.60
  -8  -8   2  216.48   14.00
  -8   8   2  193.78   12.00
   8   8   2  179.88   12.40
   8   8   2  192.28   11.80
   9   8   2   20.30    5.20
  -8   9   2   14.80    5.00
   9   8   2   16.50    4.60
  -9  -8   2   15.40    5.50
   8  -9   2   12.60    4.10
  -7   9  -2  310.57   15.40
   7  -9  -2  322.77   16.60
  -9  -7  -2  304.47   16.50
   7  -9   2  301.77   14.80
  -7   9   2  314.67   16.20
   9   7   2  290.47   16.00
   9   7   2  325.17   15.70
  -9  -7   2  329.07   17.90
   6  -9  -2  289.07   15.20
  -9  -6  -2  291.27   15.40
   9   6  -2  306.37   20.00
  -6   9  -2  286.07   14.90
  -6   9   2  289.77   15.30
   9   6   2  301.67   14.90
   9   6   2  283.37   15.40
  -9  -6   2  303.97   16.80
   6  -9   2  287.07   14.20
  -9  -5  -2  522.15   22.90
  -5   9  -2  525.75   22.70
   5  -9  -2  606.44   23.70
   9   5  -2  521.05   24.60
  -5   9   2  592.04   23.60
   5  -9   2  536.95   22.00
   9   5   2  530.55   23.30
  -9  -5   2  522.35   24.40
   9   5   2  510.15   22.40
  -9  -4  -2  440.96   19.30
  -4   9  -2  425.66   19.10
   4  -9  -2  439.66   19.30
   9   4  -2  444.26   21.10
   9   4   2  433.66   18.80
  -9  -4   2  440.26   21.00
   9   4   2  439.66   19.80
   4  -9   2  436.56   18.70
  -4   9   2  423.36   19.50
  -9  -3  -2   62.59    6.20
   9   3  -2   59.49    7.40
   3  -9  -2   84.69    7.00
   9   3   2   61.89    6.80
  -9  -3   2   64.79    7.80
   3  -9   2   55.79    7.50
   9   3   2   65.69    6.30
  -9  -2  -2    3.00    2.50
   2  -9  -2    5.60    2.90
   9   2  -2   18.10    4.30
   9   2   2    7.20    3.40
  -9  -2   2    6.30    3.30
   9   2   2    9.30    3.10
  -2   9   2    3.80    3.10
  -9  -1  -2  162.68    9.20
   9   1  -2  155.28   11.20
  -9  -1   2  164.28   10.80
   1  -9   2  155.88   10.30
   9   1   2  156.28    9.20
  -1   9   2  167.68   10.80
   9   1   2  164.88   10.00
   9   0  -2  232.88   13.60
  -9   0  -2  238.48   11.30
   0  -9  -2  225.18   12.20
   0  -9   2  236.68   13.00
   0  -9   2  236.58   12.90
   9   0   2  209.98   11.10
   9   0   2  238.98   12.20
   0   9   2  238.08   13.40
  -9   0   2  233.78   13.00
   9  -1  -2  727.03   29.80
  -9   1  -2  751.92   27.00
  -1  -9  -2  713.53   28.10
   9  -1   2  699.63   26.80
   9  -1   2  727.83   28.20
  -1  -9   2  744.83   29.30
  -1  -9   2  741.03   29.20
   1   9   2  722.43   29.60
  -9   1   2  767.12   29.50
  -2  -9  -2   85.59    7.20
  -9   2  -2   83.79    6.30
   9  -2  -2   80.89    8.00
  -2  -9  -2   87.49    8.70
  -2  -9   2  100.19   10.90
   9  -2   2   81.89    7.00
   9  -2   2   76.39    6.00
  -9   3  -2   39.50    4.90
  -3  -9  -2   48.00    7.50
   9  -3  -2   38.80    6.10
   9  -3   2   43.30    4.40
  -9   3   2   43.20    5.80
   9  -3   2   42.20    5.60
  -3  -9   2   56.59    9.00
  -4  -9  -2   34.00    6.80
   9  -4  -2   37.30    6.40
  -9   4  -2   29.90    4.20
   9  -4   2   25.30    4.80
  -4  -9   2   33.40    6.10
  -9   4   2   32.40    5.30
   9  -4   2   37.50    4.20
  -5  -9  -2  729.63   30.60
  -9   5  -2  750.02   28.00
   9  -5  -2  749.53   31.20
  -9   5   2  734.93   29.70
   9  -5   2  775.32   26.70
   9  -5   2  768.92   29.30
  -5  -9   2  742.63   31.30
   9  -6  -2   52.79    7.80
  -9   6  -2   47.60    6.00
  -6  -9  -2   51.59    7.60
   9  -6   2   65.69    5.00
  -9   6   2   55.89    6.90
   6   9   2   59.19    7.80
   9  -6   2   49.30    7.00
  -9   7  -2  158.08   10.10
   9  -7  -2  183.78   12.50
  -7  -9  -2  183.08   13.00
  -7  -9   2  169.98   13.60
   9  -7   2  169.38    8.70
   7   9   2  187.28   11.70
   9  -7   2  155.88   10.70
  -9   7   2  198.18   11.90
   9  -8   2  415.96   17.00
  -9   8   2  440.16   20.50
   8   9   2  482.95   20.50
   8   9   2  430.46   20.70
   9  -8   2  422.96   19.50
  -8  -9   2  406.56   22.00
   9   9  -2    1.40    2.50
   9   9   2    0.40    3.30
  -9   9   2   -1.40    3.20
  -9  -9   2    3.60    4.20
  10   9  -2    8.90    3.00
  -9  10   2    6.70    4.20
 -10  -9   2    8.30    4.70
  -8  10   2  174.48   12.10
  10   8   2  169.88   11.50
 -10  -8   2  165.58   13.30
  10   7   2    7.00    4.10
   7 -10   2    3.60    3.40
 -10  -7   2    4.50    4.30
  10   7   2    4.60    3.80
  -7  10   2   17.30    4.80
 -10  -6  -2   62.19    7.40
  -6  10  -2   47.70    7.30
   6 -10   2   47.80    6.50
  10   6   2   56.19    7.50
  10   6   2   62.59    7.20
 -10  -6   2   53.49    8.20
  -6  10   2   48.50    7.30
  -5  10  -2   35.90    5.90
 -10  -5  -2   43.20    6.60
   5 -10  -2   39.90    7.00
  -5  10   2   40.40    6.40
   5 -10   2   39.10    6.00
 -10  -5   2   57.09    8.20
  10   5   2   32.50    5.40
  10   5   2   37.70    6.20
   4 -10  -2  141.59   10.00
  -4  10  -2  138.69    9.80
  10   4  -2  142.69   11.60
 -10  -4  -2  140.79    9.80
   4 -10   2  135.79    9.60
  -4  10   2  134.39   10.70
  10   4   2  142.79    9.50
 -10  -4   2  130.99   11.60
  10   4   2  157.78   10.80
 -10  -3  -2   22.30    4.60
   3 -10  -2   28.90    5.10
  10   3  -2   17.40    5.40
  10   3   2   28.40    5.30
  10   3   2   29.60    4.80
   3 -10   2   23.10    5.30
 -10  -3   2   37.10    6.60
 -10  -2  -2  495.85   20.80
   2 -10  -2  466.95   21.10
  10   2  -2  580.04   24.00
  10   2   2  469.75   20.20
   2 -10   2  510.75   21.30
  -2  10   2  442.76   21.70
  10   2   2  474.55   21.80
 -10  -2   2  501.75   22.80
 -10  -1  -2    3.90    2.80
   1 -10  -2   13.60    3.60
  10   1  -2    3.90    3.50
  10   1   2    7.70    3.60
   1 -10   2    8.40    3.90
  10   1   2    7.30    3.00
 -10  -1   2    0.60    3.30
 -10   0  -2   68.29    6.40
  10   0  -2   79.99    8.60
   0 -10   2   62.89    8.00
  10   0   2   75.29    6.40
   0 -10   2   74.79    8.80
 -10   0   2   76.39    8.10
  10   0   2   66.29    7.30
  10  -1  -2  124.79   10.50
 -10   1  -2  114.09    7.80
  10  -1   2  104.49    8.60
  10  -1   2  101.89    7.40
 -10   1   2  106.19    9.30
  10  -2  -2  136.99   11.10
  -2 -10  -2  144.09   11.50
 -10   2  -2  138.39    8.60
  10  -2   2  151.78    8.50
  -2 -10   2  150.58   13.40
 -10   2   2  130.69   10.30
  10  -2   2  143.89   10.00
 -10   3  -2  685.73   25.70
  -3 -10  -2  617.34   27.70
  10  -3  -2  698.03   29.20
  -3 -10   2  685.73   28.90
 -10   3   2  686.73   27.90
  10  -3   2  684.53   25.00
  -3 -10   2  658.43   29.20
  10  -3   2  688.43   27.30
  -4 -10  -2  101.89   10.80
  10  -4  -2   66.39    9.60
 -10   4  -2   78.49    6.90
  10  -4   2   75.69    7.90
  10  -4   2   82.29    5.90
 -10   4   2   77.39    7.90
  -4 -10   2   90.89    9.90
  10  -5  -2   53.39    8.50
 -10   5  -2   64.29    6.40
  -5 -10  -2   56.59    8.20
  -5 -10   2   40.10    7.00
  10  -5   2   55.19    5.10
 -10   5   2   52.89    7.10
  10  -5   2   48.10    6.60
 -10   6  -2   37.10    5.60
  10  -6  -2   45.20    8.20
  10  -6   2   33.70    4.50
   6  10   2   45.60    6.70
 -10   6   2   42.70    6.80
  10  -6   2   44.60    6.60
  10  -7  -2  376.06   26.90
   7  10   2  417.86   18.50
 -10   7   2  345.67   17.90
  10  -7   2  335.27   17.40
  10  -7   2  331.07   14.60
  -7 -10   2  331.37   19.50
  -8 -10   2   15.50    5.70
 -10   8   2    6.30    3.80
   8  10   2    0.60    3.40
  10  -8   2    6.70    2.80
   9  10  -2  184.88   10.20
   9  10   2  234.78   13.40
 -10   9   2  232.48   14.00
  -9 -10   2  225.38   15.50
  10  10  -2   13.50    3.30
  10  10   2   15.80    5.20
 -10 -10   2   20.10    6.10
 -10  10   2   12.60    5.00
  11  10  -2    3.00    3.20
 -11 -10   2    8.80    4.60
 -10  11   2    9.60    4.60
  11  10   2    6.80    4.10
  11   9  -2    4.60    3.20
  -9  11   2    2.60    4.00
 -11  -9   2    6.10    4.30
  11   9   2    6.40    3.80
 -11  -8   2    1.30    3.80
  11   8   2    3.60    3.60
  -8  11   2   -1.20    3.10
  11   7   2  101.59    8.80
  -7  11   2   98.79    9.80
 -11  -7   2  120.09   11.40
 -11  -6   2  344.97   19.80
  11   6   2  362.96   17.60
  -6  11   2  368.66   18.70
  -5  11   2  195.98   13.30
  11   5   2  207.48   13.40
  11   5   2  198.48   12.20
 -11  -5   2  199.58   14.80
   5 -11   2  194.58   12.00
  -4  11  -2  520.35   23.40
 -11  -4  -2  535.55   24.30
   4 -11   2  496.45   22.20
  11   4   2  549.45   24.10
  -4  11   2  521.35   23.80
  11   4   2  514.65   22.00
 -11  -4   2  513.95   24.80
  11   3  -2  392.66   22.10
 -11  -3  -2  371.26   17.70
 -11  -3   2  382.26   19.70
   3 -11   2  371.16   18.00
  11   3   2  381.26   19.10
  11   3   2  370.36   17.00
  -3  11   2  356.86   18.70
 -11  -2  -2   41.00    6.00
  11   2  -2   35.70    6.60
 -11  -2   2   39.00    6.60
  -2  11   2   47.70    7.70
 -11  -1  -2   13.60    3.50
   1 -11   2    7.30    4.00
 -11  -1   2    8.10    4.10
  11   1   2   10.70    3.30
  -1  11   2    5.80    3.90
  11   1   2    8.10    3.40
 -11   0  -2  597.54   24.20
  11   0  -2  591.64   27.00
   0 -11   2  606.14   26.10
 -11   0   2  602.74   26.40
  11   0   2  595.64   25.50
   0 -11   2  632.24   25.80
  11   0   2  606.84   23.70
   0  11   2  608.14   26.70
 -11   1  -2   52.09    6.00
  11  -1  -2   53.99    8.30
  -1 -11  -2   69.19    9.30
  11  -1   2   46.50    5.70
  -1 -11   2   80.79    9.30
 -11   1   2   57.79    7.70
  -1 -11   2   74.39    9.90
  11  -1   2   51.59    6.90
  11  -2  -2   67.39    8.60
 -11   2  -2   59.09    6.20
  11  -2   2   61.89    7.40
  -2 -11   2   77.49   10.80
  -2 -11   2   64.39    9.50
 -11   2   2   59.09    7.70
  11  -2   2   66.89    6.10
  11  -4  -2  141.09   11.70
 -11   4  -2  149.88    9.80
  -4 -11  -2  146.99   13.10
  11  -4   2  142.19   10.70
 -11   4   2  154.58   11.10
  11  -4   2  162.18    8.60
  -5 -11  -2  522.05   25.60
  11  -5  -2  476.75   24.70
  -5 -11   2  502.55   24.60
  11  -5   2  535.65   23.50
 -11   5   2  519.95   23.30
  11  -5   2  530.95   20.00
   6  11   2  174.88   12.50
  11  -6   2  199.18   18.70
  11  -6   2  197.08   10.00
 -11   6   2  193.18   12.80
  -6 -11   2  220.18   15.10
  11  -7   2  466.05   18.80
   7  11   2  461.45   21.70
 -11   7   2  481.55   22.30
  -7 -11   2  475.55   24.20
  -8 -11   2    9.70    5.40
 -11   8   2    2.50    3.40
  11  -8   2    1.80    2.60
   8  11   2   11.00    4.40
   9  11  -2   70.29    6.10
   9  11   2   69.09    8.40
 -11   9   2   67.09    8.70
  -9 -11   2   83.29   10.70
 -11  10   2   48.50    7.80
 -10 -11   2   45.20    8.70
  10  11   2   37.50    6.70
  11  11  -2  216.48   11.70
  11  11   2  219.38   14.20
 -11 -11   2  228.28   16.90
  12  11   2   40.30    7.10
 -12 -11   2   44.30   10.30
 -12 -10   2   22.10    6.50
 -12  -9   2  245.18   16.90
  -9  12   2  246.28   15.80
  12   9   2  253.07   14.50
  -8  12   2   -1.70    3.70
  12   8   2    3.10    3.80
 -12  -8   2   -1.10    4.00
 -12  -7   2   31.40    7.20
  12   7   2   31.70    5.80
  -7  12   2   32.10    6.40
  12   6   2   16.00    4.70
 -12  -6   2   20.80    6.60
  -6  12   2   16.30    5.30
 -12  -5   2   58.79    9.30
  -5  12   2   58.59    8.70
  12   5   2   52.59    7.70
  -4  12   2    1.80    3.70
 -12  -4   2    0.50    4.00
  12   4   2   -2.60    3.00
  12   3   2  141.79   10.00
  -3  12   2  153.98   11.90
 -12  -3   2  152.48   12.50
  12   3   2  161.38   13.40
   2 -12   2   57.09    8.80
  -2  12   2   43.50    7.50
 -12  -2   2   44.30    7.50
  12   2   2   50.99    6.30
  12   2   2   42.30    7.10
   1 -12   2  311.07   16.50
  -1  12   2  310.67   18.10
   1 -12   2  295.07   17.00
  12   1   2  314.17   14.70
  12   1   2  304.27   16.60
 -12  -1   2  346.17   18.10
  12   0  -2   48.30    9.30
   0 -12   2   43.40    7.70
  12   0   2   55.59    7.60
 -12   0   2   31.70    6.20
   0 -12   2   36.50    6.90
  12  -1  -2  107.49   11.40
  -1 -12   2  106.89   10.80
  12  -1   2   89.99    8.90
 -12   1   2   78.39    9.40
   1  12   2   99.89   11.30
  -1 -12   2  129.89   12.20
  12  -1   2   91.79    7.40
  12  -2  -2  457.55   25.80
  -2 -12  -2  480.15   23.50
  12  -2   2  463.55   22.20
  -2 -12   2  585.84   25.60
 -12   2   2  477.85   22.90
  12  -2   2  468.05   19.60
  12  -3  -2   -7.00    6.20
  -3 -12  -2    6.20    5.30
  12  -3   2   -1.00    3.10
  -3 -12   2   -4.70    8.40
  12  -3   2   -0.60    2.50
 -12   3   2   -3.00    2.90
  -3 -12   2    5.40    5.70
 -12   4   2  102.69    9.90
  -4 -12   2  153.88   13.30
  12  -4   2  114.89    7.70
  -5 -12   2   -0.50    3.50
 -12   5   2    0.40    3.30
  12  -5   2    1.60    2.30
 -12   6   2  100.79    9.60
   6  12   2  107.69    9.80
  12  -6   2  108.49    7.60
  -6 -12   2  101.09   11.30
  12  -7   2   64.19    6.10
  -7 -12   2   53.09    9.20
   7  12   2   53.29    7.60
 -12   7   2   48.70    7.70
   8  12   2  190.98   13.10
  12  -8   2  201.18   10.90
  -8 -12   2  219.98   16.30
 -12   8   2  200.18   13.60
  -9 -12   2  109.89   12.60
   9  12   2  105.29    9.90
 -10 -12   2    6.10    5.40
  10  12   2    7.60    4.40
  11  12   2   12.20    5.50
 -11 -12   2   17.30    6.70
  12  12   2    5.50    4.40
  13  12   2  147.59   12.30
  13  11   2    2.60    4.20
  13  10   2   -3.40    3.80
 -13  -9   2    9.30    4.80
  13   9   2   -3.70    3.40
  -8  13   2   13.50    5.80
  13   8   2   13.60    4.50
 -13  -8   2   11.30    5.30
 -13  -7   2  345.77   20.60
  -7  13   2  321.07   18.90
  13   7   2  337.07   17.10
  -6  13   2   19.90    6.20
  13   6   2   17.40    4.90
 -13  -6   2   27.80    6.90
  -5  13   2  382.56   20.50
 -13  -5   2  402.06   21.80
  13   5   2  389.56   18.40
  13   4   2   -0.40    2.90
 -13  -4   2   -0.60    3.30
  -4  13   2    2.50    3.70
 -13  -3   2    0.40    3.30
  13   3   2    0.00    3.00
  -3  13   2    1.70    4.00
 -13  -2   2   -0.80    3.30
  -2  13   2   -1.00    4.00
  13   2   2   -6.00    2.40
 -13  -1   2  225.38   14.80
  -1  13   2  228.18   15.90
   1 -13   2  216.18   14.60
  13   1   2  230.78   12.40
 -13   0   2  136.69   11.50
   0 -13   2  134.39   11.60
  13   0   2  140.09    9.10
   0  13   2  139.99   13.40
  13  -1   2  277.47   13.40
  -1 -13   2  272.97   17.60
 -13   1   2  276.17   16.40
  -2 -13   2   30.50    8.80
 -13   2   2   19.90    5.80
  13  -2   2   25.70    4.30
 -13   3   2   21.40    5.20
  -3 -13   2   56.29   10.20
  13  -3   2   29.10    4.40
 -13   4   2  334.27   17.80
  -4 -13   2  312.27   19.70
  13  -4   2  340.07   15.00
  -5 -13   2  170.98   14.00
 -13   5   2  167.38   12.40
  13  -5   2  173.98    9.80
  13  -6   2  498.55   20.50
  -6 -13   2  537.25   26.30
 -13   6   2  491.05   23.60
   6  13   2  480.95   22.70
   7  13   2   18.60    5.50
 -13   7   2   11.80    4.70
  13  -7   2   14.20    3.70
  -7 -13   2   15.40    6.60
  13  -8   2   -1.00    2.80
   8  13   2    4.20    4.20
  -8 -13   2    6.90    4.80
   9  13   2   62.59    8.50
  -9 -13   2   44.50    9.80
 -10 -13   2  213.48   17.30
  10  13   2  240.28   15.10
  11  13   2   36.60    7.10
  12  13   2   20.90    5.80
  13  13   2   10.60    5.50
  14  13   2   67.89    9.40
  14  12   2    0.90    4.30
  14  11   2    8.70    5.10
  14  10   2   76.49    9.90
  14   9   2   -3.70    3.80
  14   8   2   31.30    6.20
 -14  -7   2    6.30    6.20
  14   7   2    3.30    3.90
  -6  14   2    4.30    4.50
 -14  -6   2    2.80    4.20
  14   6   2   16.30    4.30
  -5  14   2   49.60    8.20
 -14  -5   2   47.50    8.40
  14   5   2   52.59    7.50
 -14  -4   2   97.99   11.10
  14   4   2  106.19    8.90
  -4  14   2   96.99   11.20
  14   3   2  219.88   12.40
 -14  -3   2  208.38   15.40
  -3  14   2  195.98   14.90
  14   2   2   59.59    6.70
  -2  14   2   61.69   10.10
 -14  -2   2   46.70    8.20
  14   1   2   15.20    3.80
  -1  14   2   15.80    6.10
 -14  -1   2   11.00    5.30
   1 -14   2   15.10    5.70
   0 -14   2   -2.20    3.60
 -14   0   2   -4.70    3.20
   0  14   2    6.40    4.90
  14   0   2    0.10    2.60
  -1 -14   2  168.28   14.80
  14  -1   2  161.08    9.90
 -14   1   2  169.88   13.20
 -14   2   2    0.40    3.60
  14  -2   2    2.00    2.60
  -2 -14   2   10.30    6.90
 -14   3   2  253.47   15.60
  14  -3   2  232.88   12.40
  14  -4   2    0.90    2.90
  -4 -14   2    4.80    5.10
 -14   4   2   -1.40    3.40
  -5 -14   2    5.50    4.40
 -14   5   2    1.40    4.70
  14  -5   2   -0.70    3.20
  -6 -14   2   37.20    7.90
  14  -6   2   44.20    5.80
   7  14   2   88.09    9.70
  14  -7   2   97.29    8.20
  -7 -14   2   87.09   12.90
   8  14   2   42.30    7.50
  -8 -14   2   57.19   10.10
  -9 -14   2   31.60    8.20
   9  14   2   17.10    5.30
  10  14   2   20.90    6.10
  11  14   2   56.79    8.70
  12  14   2  115.09   11.20
  13  14   2   88.19   10.90
  14  14   2   52.79    8.80
  15  14   2   -0.80    4.70
  15  13   2   39.30    7.60
  15  12   2   47.00    7.90
  15  11   2   72.69    9.10
  15  10   2    4.00    4.50
  15   9   2    2.00    4.10
  15   8   2  215.18   13.60
  15   7   2  171.38   12.10
  15   6   2  150.98   11.00
  15   5   2   -1.80    3.20
  -5  15   2    5.40    6.00
  15   4   2   13.50    4.20
  -4  15   2   -1.60    4.20
  -3  15   2   -2.70    3.60
  15   3   2    2.10    3.20
   2 -15   2  101.09   12.00
  -2  15   2  117.59   13.20
 -15  -2   2  126.69   14.60
  15   2   2  105.69    8.60
  -1  15   2   81.09   11.80
 -15  -1   2   61.29   11.10
   1 -15   2   82.69   11.40
  15   1   2   56.99    7.20
  15   0   2   25.60    4.70
 -15   0   2   20.70    7.90
   0 -15   2   26.20    7.90
  15  -1   2   70.99    7.50
  -1 -15   2  108.79   13.60
  -2 -15   2   71.89   12.80
  15  -3   2  138.99    9.50
  -3 -15   2  162.28   16.70
  15  -4   2   23.90    4.60
  -4 -15   2   25.30    8.10
  -5 -15   2  882.21   39.40
  15  -5   2  899.01   33.80
  15  -6   2   49.00    7.10
  -6 -15   2   46.80    8.90
   6  15   2   61.99    8.70
  15  -7   2   68.09    7.90
  -7 -15   2   96.39   13.10
   7  15   2   88.09    9.70
  -8 -15   2   11.50    6.20
   8  15   2   21.30    5.80
   9  15   2  238.08   15.30
  10  15   2  103.79   11.50
  11  15   2   24.60    6.50
  12  15   2   25.00    6.70
  13  15   2    6.60    5.30
  14  15   2   42.70    8.20
  15  15   2    0.60    4.70
  16  15   2  105.49   11.80
  16  14   2   -1.80    4.40
  16  13   2    0.00    4.20
  16  12   2    1.10    4.20
  16  11   2   76.79    9.70
  16  10   2   24.80    6.10
  16   9   2   92.99   10.00
  16   8   2   29.10    6.00
  16   7   2   30.80    5.70
  16   6   2    1.90    3.40
  16   5   2   57.29    7.70
  16   4   2   16.60    4.60
  16   3   2   23.60    5.20
   2 -16   2    5.50    5.30
  -2  16   2    2.90    6.20
  16   2   2    4.20    3.50
  16   1   2   47.60    6.60
   1 -16   2   41.70    8.10
  -1  16   2   43.90    9.20
  16   0   2   97.49    8.30
   0 -16   2   86.49   12.70
  -1 -16   2  118.89   14.80
  16  -1   2  101.59    8.50
  16  -2   2  114.69    8.90
  -2 -16   2  123.09   17.10
  16  -3   2   56.29    7.00
  16  -4   2   23.50    4.80
  -4 -16   2    1.40    5.70
  -5 -16   2    6.40    5.10
  16  -5   2   -0.20    3.60
   5  16   2    4.00    4.60
  16  -6   2   14.00    4.60
  -6 -16   2    8.90    5.40
   6  16   2   23.90    5.90
   7  16   2  180.98   13.20
  16  -7   2  156.28   11.50
   8  16   2   31.50    6.80
   9  16   2  124.19   11.60
  10  16   2   60.69    9.10
  11  16   2   36.80    7.70
  12  16   2   12.20    6.30
  13  16   2   50.09    8.80
  14  16   2   -8.60    4.60
  15  16   2   -1.00    4.80
  17  14   2    4.60    5.20
  17  13   2   91.29   11.00
  17  12   2   15.20    5.70
  17  11   2   34.50    7.10
  17  10   2    4.30    4.50
  17   9   2   49.80    7.70
  17   8   2   20.30    5.60
  17   7   2  396.96   20.00
  17   6   2    1.50    4.10
  17   5   2   42.30    6.60
  17   4   2    6.00    4.00
   3 -17   2  184.08   15.70
  17   3   2  171.58   11.70
  17   2   2   32.30    5.70
   2 -17   2   22.30    7.40
   1 -17   2   16.20    6.20
  17   1   2   14.30    4.40
  17   0   2   55.69    7.20
   0 -17   2   57.19   10.80
  17  -1   2   19.60    4.70
  -1 -17   2   15.10    9.00
  17  -2   2   33.90    5.60
  17  -3   2    4.60    3.80
  -3 -17   2    1.80    6.80
  17  -4   2  231.68   13.70
  -4 -17   2  258.67   20.60
  17  -5   2   36.70    6.30
   5  17   2   37.70    7.40
  -5 -17   2   37.30    8.60
   6  17   2   12.60    5.60
  17  -6   2   11.20    4.70
   7  17   2   33.20    6.60
   8  17   2    6.50    4.80
   9  17   2  236.98   16.00
  10  17   2    4.80    5.50
  11  17   2   47.70    9.20
  12  17   2    0.60    7.80
  18  13   2    9.20    5.50
  18  12   2   -1.10    4.50
  18  11   2   77.89   10.30
  18  10   2   31.40    6.70
  18   9   2   35.70    6.90
  18   8   2   -2.80    3.90
  18   7   2    4.00    4.50
  18   6   2    5.40    4.40
  18   5   2  197.98   13.30
  18   4   2   22.40    5.40
  18   3   2   98.89    9.40
  18   2   2   -3.80    3.40
  18   1   2   57.89    7.70
  18   0   2    0.10    3.50
   0 -18   2   -3.70    9.20
  18  -1   2   50.89    7.40
  -1 -18   2   77.59   16.60
  18  -2   2   31.90    6.00
  -2 -18   2   71.59   14.60
  18  -3   2    1.20    3.80
  -3 -18   2   18.10    7.60
  -4 -18   2   18.70    8.40
  18  -5   2   -6.10    3.70
  18  -6   2   56.89    8.00
  19  11   2    2.90    5.10
  19  10   2    5.00    5.00
  19   9   2   21.00    6.40
  19   8   2  119.69   11.60
  19   7   2   20.20    6.10
  19   6   2   17.00    5.50
  19   5   2    8.40    5.20
  19   4   2    8.90    4.60
  19   3   2  105.99   10.20
  19   2   2    2.30    4.20
  19   1   2  158.68   11.80
  19   0   2    4.00    4.20
  19  -1   2   59.49    8.40
  19  -2   2    6.60    4.40
  19  -3   2  251.67   15.30
  19  -4   2   79.09    9.70
  19  -5   2   38.70    7.00
  20  10   2   74.89   10.50
  20   9   2    0.90    4.70
  20   8   2   21.90    6.40
  20   7   2   24.10    6.20
  20   6   2   18.60    6.00
  20   5   2   21.40    6.00
  20   4   2   35.70    6.80
  20   3   2   -2.20    4.00
  20   2   2   12.40    5.10
  20   1   2  107.39   10.40
  20   0   2   59.69    8.80
  20  -1   2  154.98   12.40
  20  -2   2    2.50    4.40
  20  -3   2   -0.60    4.10
  20  -4   2    6.20    5.00
  20  -5   2   53.19    8.50
  21   7   2    8.80    5.40
  21   6   2   24.50    6.60
  21   5   2    1.10    4.50
  21   4   2   27.70    6.60
  21   3   2    2.00    4.80
  21   2   2   58.99    8.60
  21   1   2   33.10    7.10
  21   0   2   -3.00    4.60
  21  -1   2   32.10    7.10
  21  -2   2   56.29    8.90
  21  -3   2  126.69   12.60
  21  -4   2   23.50    6.60
  22   4   2    8.40    6.10
  22   3   2    8.40    5.40
  22   2   2    3.50    5.40
  22   1   2   -0.30    4.90
  22   0   2   52.69    8.70
  22  -1   2   20.80    6.40
  22  -2   2   11.20    5.90
  22  -3   2    5.20    5.40
  -2   1   3   70.99    4.60
  -2   2   3 1410.96   47.20
   3   2  -3  426.86   16.30
   2  -3  -3  393.06   15.90
  -3  -2   3  388.86   16.10
  -2   3   3  397.06   15.70
   3   0  -3  294.07   12.30
  -3   0   3  264.17   11.90
   3  -1  -3    5.80    2.30
  -3   1   3    0.80    2.10
   3  -2  -3    8.20    2.60
  -3   2   3   10.80    2.70
  -2  -3   3    6.60    2.70
   4   3  -3  114.19    8.10
   3  -4   3  151.28    7.10
  -4  -3   3  118.89    8.30
   2  -4  -3 2581.34   83.49
   4   2  -3 2474.95   83.99
  -2   4   3 2415.16   82.99
  -4  -2   3 2638.44   84.29
   4   1  -3  142.39    8.50
   1  -4  -3  144.59    7.90
  -1   4   3  126.49    7.50
  -4  -1   3  147.79    8.50
   4   0  -3  103.59    7.00
   0   4   3   79.79    5.90
   4  -1  -3   36.80    5.00
  -4   1   3   35.40    4.60
   4  -2  -3 2061.39   68.69
   2   4   3 1979.20   67.49
  -4   2   3 2035.60   68.09
  -2  -4   3 2080.79   68.39
   3   4  -3  187.08    9.60
  -4   3   3  184.58    9.60
  -3  -4   3  186.28   10.10
   4   4  -3  178.98   10.10
   4  -4  -3  194.18   10.50
  -4   4   3  193.38    9.80
   4  -4   3  188.68    8.70
  -4  -4   3  180.88   10.50
   5   4  -3    0.20    2.20
   4  -5  -3    1.90    2.30
   4  -5   3   -1.10    1.50
   5   4   3   -0.10    1.70
  -5  -4   3    2.50    2.50
  -4   5   3    3.50    2.40
   5   3  -3   13.20    3.20
   3  -5  -3    7.50    2.90
  -5  -3   3   16.70    3.60
  -3   5   3    8.10    2.50
   3  -5   3    8.40    2.00
   5   2  -3   48.30    5.80
   2  -5   3   43.10    3.80
  -2   5   3   56.69    5.10
  -5  -2   3   57.09    5.90
   5   1  -3    3.00    2.20
  -1   5   3    4.80    2.10
  -5  -1   3    0.00    2.20
   5   0  -3  108.69    8.00
   0  -5  -3  132.09    6.80
  -5   0   3  104.99    7.50
  -1  -5  -3    6.50    2.70
   5  -1  -3    5.30    2.70
  -1  -5  -3    3.80    1.90
   1   5   3    3.60    2.30
  -1  -5   3   -1.60    2.40
  -5   1   3    1.80    2.40
   5  -2  -3   85.39    6.90
   5  -2   3  105.49    6.60
   2   5   3   91.49    6.90
  -2  -5   3   80.09    6.70
  -5   2   3   89.39    6.60
   3   5  -3   -0.50    2.30
   5  -3  -3    2.80    2.60
  -5   3   3   -0.70    1.90
  -3  -5   3   -1.00    2.40
   5  -4  -3  124.79    8.60
   5  -4   3  120.89    6.80
  -5   4   3  121.99    7.90
   5  -5  -3    6.80    4.10
  -5  -5  -3    7.70    2.70
  -5   5   3    6.40    3.20
  -5  -5   3    9.10    3.50
   5  -5   3    7.70    2.20
  -6  -5  -3    7.70    2.60
  -6  -5   3    3.00    3.30
   5  -6   3    4.70    1.80
  -5   6   3    2.50    2.60
   6   5   3    8.10    2.80
   6   4   3 1287.07   45.90
  -6  -4   3 1284.37   47.70
   4  -6   3 1325.87   43.80
  -4   6   3 1400.46   46.90
   6   3  -3  152.28   10.20
   3  -6  -3  158.98   10.20
   3  -6   3  150.38    6.60
  -3   6   3  149.49    9.00
  -6  -3   3  153.88   10.00
   2  -6  -3   25.10    4.00
   6   2  -3   18.10    4.00
   6   2   3   22.70    4.40
   2  -6   3   17.70    2.50
  -2   6   3   23.80    3.90
  -6  -2   3   20.20    4.10
   6   1  -3   33.80    5.20
   1  -6  -3   37.50    4.70
   1  -6   3   21.70    3.90
  -6  -1   3   34.20    5.20
   1  -6   3   23.80    3.90
   6   1   3   21.80    4.20
  -1   6   3   33.10    4.60
   6   0  -3  527.15   22.20
   0  -6  -3  554.24   20.80
   0   6   3  544.25   21.50
   6   0   3  534.05   21.50
   0  -6   3  535.75   21.20
   0  -6   3  558.34   21.10
  -6   0   3  542.85   22.00
   6  -1  -3  144.19    9.30
  -1  -6  -3  130.29    8.40
  -1  -6  -3  134.59    7.50
  -6   1   3  136.39    8.70
   6  -1   3  128.99    8.10
  -1  -6   3  118.19    8.40
   1   6   3  141.29    8.80
   6  -2  -3    1.40    2.40
  -2  -6  -3    2.50    2.40
  -2  -6  -3    3.80    2.40
  -2  -6   3    9.20    3.00
   2   6   3    3.00    2.70
   6  -2   3    3.80    2.30
  -6   2   3   -2.40    1.90
  -3  -6  -3    1.40    2.40
   6  -3  -3   -1.30    2.40
  -6   3   3   -1.00    2.00
   6  -3   3    0.00    1.80
  -3  -6   3   -1.50    2.40
   6  -4  -3   51.19    7.70
  -4  -6  -3   49.90    5.60
   6  -4   3   47.70    5.00
  -4  -6   3   54.59    6.70
  -6   4   3   43.10    5.60
  -5  -6  -3   12.80    3.50
  -6   5   3   10.90    3.30
  -5  -6   3   15.00    4.10
  -6  -6  -3  696.83   27.50
  -6  -6   3  699.93   29.20
   6  -6   3  719.53   24.80
  -6   6   3  715.93   27.90
   6  -6   3  704.13   25.80
  -7  -6  -3    3.80    2.60
  -6   7   3    2.40    3.10
   7   6   3    2.80    4.00
   6  -7   3    5.60    1.90
   7   6   3    4.80    2.90
   6  -7   3    2.50    2.40
  -7  -6   3    6.90    3.80
  -7  -5  -3    5.70    2.80
   5  -7   3    5.10    1.80
   7   5   3    5.90    3.10
  -7  -5   3    1.30    3.50
   5  -7   3    1.50    2.50
   7   5   3    5.40    3.90
  -5   7   3    4.40    3.10
   4  -7   3  130.29    5.70
   7   4   3  122.19    9.60
  -7  -4   3  133.79   10.10
   4  -7   3  127.99    7.60
   7   4   3  118.19    8.10
   7   3   3   31.10    4.80
  -3   7   3   34.10    5.00
   3  -7   3   29.50    2.50
   7   3   3   31.90    5.30
   3  -7   3   32.10    5.00
  -7  -2   3  136.29    9.50
   2  -7   3  127.49    8.00
   7   2   3  125.99    9.10
   7   2   3  142.19    8.20
  -2   7   3  119.09    8.80
   7   1  -3   15.50    4.30
   1  -7   3   14.40    3.60
   7   1   3   10.10    3.50
   1  -7   3   18.20    3.90
  -1   7   3    8.90    3.50
   7   0  -3   64.89    7.20
   7   0   3   51.79    6.50
  -7   0   3   65.49    6.60
   0   7   3   74.59    7.10
   7  -1  -3    2.70    3.10
  -1  -7  -3    3.90    3.10
  -1  -7   3    1.30    2.90
   1   7   3    6.20    3.30
  -7   1   3    0.10    2.30
  -2  -7  -3    0.40    2.90
   7  -2  -3    0.00    2.80
   2   7   3    0.80    3.50
  -2  -7   3    1.90    3.00
  -7   2   3    1.40    2.40
   7  -2   3    3.50    3.00
  -3  -7  -3    3.30    3.20
  -3  -7   3    2.50    3.10
  -7   3   3    2.50    2.40
   7  -3   3   -0.80    2.20
  -7   4   3   26.80    4.80
   7  -4   3   23.90    3.80
  -5  -7  -3    6.70    3.40
  -7   5   3   -0.50    2.90
   7  -5   3   -4.10    2.10
  -6  -7   3   23.50    5.50
   7  -6   3   22.60    3.10
   7  -6   3   18.40    3.50
  -7   6   3   19.50    4.60
  -7  -7  -3    4.50    3.00
   7   7   3   -1.00    3.70
   7  -7   3   -0.70    1.80
  -7  -7   3   -0.50    3.80
   7  -7   3    3.00    3.00
   8   7   3   35.80    6.50
   8   7   3   39.40    6.40
  -7   8   3   50.69    6.90
   7  -8   3   29.10    5.00
   7  -8   3   43.50    4.00
  -8  -6  -3 1232.58   44.60
  -8  -6   3 1164.28   46.20
   8   6   3 1231.68   45.50
   6  -8   3 1207.18   43.00
   8   6   3 1223.08   44.90
  -6   8   3 1252.47   45.20
   6  -8   3 1254.47   40.60
  -8  -5  -3  167.68   10.10
  -5   8   3  191.08   11.40
   8   5   3  165.38   10.30
   5  -8   3  178.78    7.30
   8   5   3  170.48   11.40
  -8  -5   3  172.28   12.30
   5  -8   3  163.08    9.70
  -8  -4  -3 1761.02   61.59
   8   4   3 1797.22   63.19
   4  -8   3 1837.82   61.29
   8   4   3 1732.93   62.19
  -4   8   3 1867.71   63.19
  -8  -4   3 1840.72   64.69
   4  -8   3 1808.02   58.19
  -3   8   3   18.90    4.50
   8   3   3   13.20    4.10
   3  -8   3   19.20    4.20
   8   3   3   17.10    3.80
   8   2   3   26.00    4.80
  -2   8   3   23.80    4.80
   2  -8   3   16.80    4.00
  -8  -2   3   21.20    4.70
   8   2   3   20.30    4.10
   1  -8   3   40.20    6.20
   1  -8   3   46.00    6.30
   8   1   3   50.59    6.10
  -1   8   3   50.79    7.20
  -8  -1   3   63.29    7.10
   0  -8   3 2450.75   79.69
   0  -8   3 2333.87   79.49
   0   8   3 2356.86   80.19
   8   0   3 2328.77   79.29
  -8   0   3 2311.67   80.59
  -1  -8  -3   53.59    7.50
   1   8   3   26.00    5.40
  -8   1   3   38.30    6.20
   8  -1   3   42.50    5.60
  -2  -8  -3  325.47   16.10
  -8   2   3  326.17   16.00
   8  -2   3  343.37   14.70
   2   8   3  325.87   16.90
  -2  -8   3  315.07   16.20
  -3  -8  -3   -4.60    3.30
  -8   3   3   -3.20    2.40
  -3  -8   3    2.50    3.40
   8  -3   3    5.10    2.50
  -4  -8  -3  616.44   26.80
  -8   4   3  654.53   27.00
   8  -4   3  754.12   25.80
  -4  -8   3  629.94   28.00
   8  -4   3  673.23   24.70
  -5  -8  -3   28.50    5.30
  -8   5   3   23.10    4.70
  -5  -8   3   25.20    5.80
  -6  -8  -3   88.99    9.00
  -6  -8   3   98.59   10.10
   8  -6   3   79.59    7.30
  -8   6   3   86.29    8.20
   8  -7   3   43.20    4.10
   8  -7   3   25.00    4.90
  -7  -8   3   35.20    6.60
  -8   7   3   32.50    5.90
   8   8   3   25.70    5.80
  -8  -8   3   32.70    6.40
  -8   8   3   27.60    5.60
   8  -8   3   23.60    3.30
   8  -8   3   27.50    4.60
   8  -9   3    6.70    2.30
   9   8   3    6.30    4.10
  -8   9   3    6.40    3.80
  -9  -8   3    3.70    4.00
   7  -9   3    8.60    2.30
  -7   9   3    4.20    3.70
   7  -9   3    6.10    3.10
   9   7   3    4.00    4.30
  -9  -7   3    9.00    4.40
   6  -9   3    6.50    3.00
   9   6   3    2.80    4.00
   9   6   3    5.30    3.40
  -6   9   3    4.80    3.50
  -9  -5  -3   12.40    3.50
   5  -9   3    8.70    1.90
   9   5   3    7.60    4.10
  -5   9   3    8.90    3.70
   5  -9   3   11.20    3.50
   9   5   3   11.20    3.80
  -9  -5   3   10.60    4.70
  -9  -4  -3   12.60    3.20
   9   4   3    3.70    3.50
   4  -9   3    3.80    3.30
   9   4   3   10.70    3.50
  -9  -4   3    6.30    4.20
  -9  -3   3    1.20    3.40
   9   3   3    1.80    3.10
  -3   9   3   -1.40    3.60
   9   3   3    1.90    2.80
   3  -9   3   -2.90    3.20
   9   2   3    3.00    3.10
   9   2   3    0.30    2.90
  -9  -2   3    7.40    3.60
  -2   9   3   -1.60    3.70
   2  -9   3   -4.00    2.90
   9   1   3   14.50    4.10
   1  -9   3   12.70    4.20
   9   1   3    9.70    4.00
   1  -9   3   11.30    4.60
  -9  -1   3   18.20    4.50
  -1   9   3   11.90    4.60
  -9   0   3   10.40    4.00
   0  -9   3   11.00    4.90
   9   0   3    3.90    3.40
   9   0   3   11.70    3.60
   0  -9   3   12.60    4.90
  -1  -9  -3   16.50    4.50
   9  -1   3    3.20    3.20
  -9   1   3    3.10    3.60
   9  -1   3    4.00    3.40
  -2  -9  -3   72.49    8.60
   9  -2   3   74.89    7.00
  -9   2   3   64.89    7.50
  -2  -9   3   92.39    9.70
   2   9   3   72.69    9.80
   9  -2   3   76.89    6.80
  -3  -9  -3   12.30    4.80
   9  -3   3   13.00    3.40
   9  -3   3   11.10    3.70
  -3  -9   3   10.30    4.40
  -9   3   3   14.10    4.20
   9  -4   3   30.20    4.80
  -4  -9   3   55.49    8.50
   9  -4   3   32.50    4.80
  -9   4   3   33.10    5.40
  -5  -9  -3    0.30    3.20
  -9   5   3    3.00    3.30
   9  -5   3    0.90    2.70
   9  -5   3    0.90    2.40
   9  -6   3   43.10    4.60
  -9   6   3   32.40    5.90
  -6  -9   3   40.50    7.60
   9  -6   3   32.10    5.60
  -9   7   3    0.80    3.40
   9  -7   3    1.90    2.20
   9  -7   3    1.40    3.00
  -7  -9   3    0.00    3.80
   9  -8   3   76.29    5.60
  -8  -9   3   93.69   10.50
  -9   8   3   77.39    8.30
   8   9   3   72.59    8.80
  -9  -9   3   -0.90    3.20
   9   9   3   -0.20    3.70
  -9   9   3   -0.50    2.90
   9  -9   3    1.20    2.00
 -10  -9   3   41.40    8.10
  10   9   3   50.49    7.70
 -10  -8   3    5.40    4.20
  -8  10   3    2.60    3.70
  10   8   3   10.00    4.50
  10   7   3    1.10    3.60
  -7  10   3   13.90    4.50
 -10  -7   3    8.70    4.40
  -6  10   3   58.49    7.90
  10   6   3   62.99    8.40
 -10  -6   3   61.49    9.40
  10   5   3  175.08   12.40
 -10  -5   3  196.88   14.00
  10   5   3  179.88   12.00
   5 -10   3  179.78   11.10
  -5  10   3  211.78   12.90
  10   4   3    2.70    2.80
 -10  -4   3   -0.30    3.60
  -4  10   3    6.70    3.70
  10   4   3   -3.20    3.10
   4 -10   3    0.70    2.80
  -3  10   3    7.90    4.10
  10   3   3    2.70    2.90
   3 -10   3   -3.60    3.30
 -10  -3   3    1.40    3.30
  10   3   3   -4.10    2.90
  10   2   3  118.09    9.60
  -2  10   3  156.88   11.40
   2 -10   3  104.79    9.60
  10   2   3  128.49    9.40
 -10  -2   3  132.79   10.70
 -10  -1   3  188.78   12.50
   1 -10   3  178.58   12.00
   1 -10   3  158.48   12.20
  10   1   3  199.98   11.90
  10   1   3  181.38   11.30
  10   0   3  131.79    9.40
  10   0   3  136.59    9.50
   0  10   3  135.59   11.40
 -10   0   3  140.29   10.60
  -1 -10  -3   26.20    5.90
  -1 -10   3   23.10    8.30
 -10   1   3   20.80    5.00
  -1 -10   3   15.90    6.30
   1  10   3   19.10    6.40
  -2 -10  -3   14.30    5.40
 -10   2   3    9.40    4.10
  10  -2   3   10.10    3.50
  -2 -10   3   19.90    5.80
  10  -2   3   11.30    3.70
  -2 -10   3   25.00    6.10
   2  10   3   11.00    5.20
  -3 -10  -3   17.20    6.60
  -3 -10   3    2.40    3.90
 -10   3   3    3.50    3.40
  10  -3   3    4.80    3.00
  10  -3   3    4.60    3.10
  10  -4   3  843.62   30.40
  -4 -10   3  785.02   34.00
 -10   4   3  850.31   33.30
  10  -4   3  847.52   32.10
  10  -5   3    7.20    3.80
  10  -5   3   16.10    3.30
  -5 -10   3    8.30    5.20
 -10   5   3    9.20    4.10
 -10   6   3 1447.76   53.19
  -6 -10   3 1435.26   54.99
  10  -6   3 1457.45   52.09
  10  -6   3 1461.95   49.40
  10  -7   3    4.30    2.50
 -10   7   3    5.30    3.80
  -8 -10   3  123.29   12.00
 -10   8   3  122.89   10.30
   8  10   3  117.69   10.90
  10  -8   3  120.59    7.40
  10  -9   3    3.60    2.50
   9  10   3    4.80    4.50
 -10   9   3    2.70    4.00
  -9 -10   3    5.90    4.60
  10  10   3  149.49   11.80
 -10  10   3  126.49   11.20
 -10 -10   3  135.99   12.90
  11  10   3    3.60    4.40
 -10  11   3    4.00    3.90
 -11 -10   3   -1.20    3.90
  11   9   3    2.20    4.30
 -11  -9   3    4.00    4.20
  -9  11   3    3.60    4.10
 -11  -8   3   -0.30    3.80
  11   8   3    1.90    3.80
  -8  11   3   -2.50    3.50
 -11  -7   3    7.10    4.70
  -7  11   3    1.70    3.80
  11   7   3   10.10    4.60
  -6  11   3    3.80    3.50
 -11  -6   3    0.90    4.00
  11   6   3    1.90    3.80
 -11  -5   3   36.30    7.50
  -5  11   3   24.80    6.10
  11   5   3   20.30    5.50
  -4  11   3    4.80    4.10
 -11  -4   3   10.10    4.30
  11   4   3    2.40    3.60
  11   3   3    6.10    3.50
  -3  11   3    1.40    3.60
 -11  -3   3    4.20    3.90
  11   3   3    1.20    3.60
   2 -11   3    2.30    4.00
  -2  11   3    1.40    3.70
   2 -11   3    2.00    4.40
  11   2   3    4.00    3.50
  11   2   3    3.80    3.30
 -11  -2   3    4.00    3.70
  11   1   3   -2.10    3.00
 -11  -1   3    3.60    3.30
  -1  11   3   -1.10    3.70
   1 -11   3   -2.60    3.20
  11   1   3    0.50    2.80
  11   0   3   20.50    4.50
   0  11   3   25.50    6.10
  11   0   3   21.90    4.70
   0 -11   3   24.30    5.60
 -11   0   3   25.80    5.90
   0 -11   3   37.40    6.80
 -11   1   3   13.60    5.00
  11  -1   3   15.60    4.10
   1  11   3   19.80    5.90
  11  -1   3   14.00    4.10
  -1 -11   3   11.00    7.60
  -1 -11   3   14.20    6.80
 -11   2   3   12.40    4.70
  11  -2   3   13.50    3.80
  11  -2   3   17.60    4.40
  11  -3   3   18.10    4.60
  -3 -11   3    9.10    5.30
 -11   3   3   12.50    4.40
  11  -3   3   17.50    4.10
 -11   4   3   -1.10    3.10
  -4 -11   3   -1.50    3.50
  11  -4   3    1.20    2.70
  11  -4   3   -1.60    2.70
  11  -5   3    0.80    2.50
 -11   5   3   -1.70    3.20
  -5 -11   3    6.20    4.50
  -6 -11   3   29.30    6.80
  11  -6   3   38.50    5.10
 -11   6   3   40.60    6.70
  -7 -11   3   23.20    7.10
   7  11   3    8.80    5.40
 -11   7   3   12.60    4.80
  11  -7   3   11.90    3.20
   8  11   3   39.40    7.20
  -8 -11   3   35.90    7.60
  11  -8   3   37.00    5.00
 -11   8   3   43.90    7.50
  -9 -11   3    2.40    4.30
   9  11   3    5.40    4.30
  11  -9   3   -3.50    2.30
 -11   9   3   -0.30    3.10
 -11  10   3    0.00    3.60
  10  11   3    4.70    4.40
 -10 -11   3    8.60    5.00
 -11  11   3   -3.70    3.70
 -11 -11   3    0.50    4.40
  11  11   3    1.20    4.20
 -12 -11   3   18.10    6.60
  12  11   3   18.00    6.50
  12  10   3  237.08   15.60
 -12 -10   3  250.17   17.80
 -10  12   3  236.08   16.60
 -12  -9   3   33.10    7.80
  -9  12   3   45.50    8.00
 -12  -8   3   91.49   11.50
  12   8   3  108.79   10.40
  -8  12   3  102.89   10.60
  12   7   3   62.49    8.50
 -12  -7   3   50.49    9.30
  -7  12   3   54.19    8.70
 -12  -6   3 1128.59   45.60
  12   6   3 1074.09   42.20
  -6  12   3 1108.99   43.90
 -12  -5   3   58.99    9.10
  -5  12   3   61.69    9.50
  12   4   3  395.76   19.20
  -4  12   3  407.56   20.80
 -12  -4   3  379.76   21.00
   2 -12   3   24.10    5.50
 -12  -2   3   13.00    4.80
  12   2   3   15.70    4.40
  -2  12   3   19.10    6.00
  12   1   3   82.09    7.90
   1 -12   3   68.79    9.10
  -1  12   3   80.59   10.10
 -12  -1   3   82.69    9.20
   0  12   3  360.36   19.90
 -12   0   3  359.86   19.10
  12   0   3  348.37   16.50
   0 -12   3  332.97   18.90
 -12   1   3    9.90    4.40
  -1 -12   3   42.10   10.20
   1  12   3   12.50    5.70
 -12   2   3   23.50    5.80
  12  -2   3   34.00    5.00
  -3 -12   3   45.20    7.90
  12  -3   3   39.10    5.30
 -12   3   3   36.20    6.40
  12  -4   3    0.50    2.70
 -12   4   3    1.80    3.50
  -4 -12   3    9.00    4.40
 -12   5   3   43.40    7.00
  -5 -12   3   64.59   10.10
  12  -5   3   46.60    5.60
  -6 -12   3  212.18   15.80
 -12   6   3  214.38   14.00
  12  -6   3  224.38   11.20
  12  -7   3   19.60    3.60
  -7 -12   3   10.60    6.00
 -12   7   3   12.60    4.70
  -8 -12   3    8.80    5.00
   8  12   3    2.20    4.90
  12  -8   3    3.20    2.90
 -12   8   3    3.40    4.10
   9  12   3    6.90    5.00
  12  -9   3    7.40    3.10
  -9 -12   3    4.40    5.30
 -12   9   3    6.60    4.60
 -10 -12   3  376.86   22.90
  10  12   3  385.76   20.70
 -11 -12   3   22.50    7.10
  11  12   3   21.20    6.60
 -12 -12   3   23.60    7.10
  12  12   3   31.10    7.10
  13  12   3    4.00    5.20
  13  11   3    1.60    4.60
 -13 -10   3   36.70    8.30
  13  10   3   35.50    7.30
  -9  13   3   10.50    5.30
 -13  -9   3   10.30    5.60
  13   9   3   15.00    5.70
 -13  -8   3   28.90    8.00
  13   8   3   26.70    6.40
  -8  13   3   21.60    6.60
 -13  -7   3   12.80    6.10
  13   7   3    7.50    4.50
  -7  13   3   10.30    5.50
 -13  -6   3    5.80    4.40
  -6  13   3    8.50    4.90
  13   6   3    4.80    4.20
 -13  -5   3    3.10    4.30
  13   5   3    3.70    4.00
  -5  13   3    1.90    3.90
  -4  13   3    9.80    4.90
  13   4   3    6.40    4.00
 -13  -4   3    7.00    4.70
  -3  13   3   12.50    5.40
  13   3   3   16.90    4.60
 -13  -3   3    7.70    4.90
 -13  -2   3   14.50    5.10
  -2  13   3   17.20    5.90
   2 -13   3   17.40    5.80
  13   2   3   21.30    4.80
   1 -13   3    5.20    4.20
 -13  -1   3    5.30    4.00
  -1  13   3    1.50    4.90
  13   1   3    8.80    3.60
   0 -13   3    4.60    5.50
  13   0   3    1.20    2.90
   0  13   3    0.90    5.40
 -13   0   3    0.70    3.50
 -13   1   3   -0.10    3.50
  -1 -13   3   -5.20    7.00
   1  13   3    7.60    4.90
  13  -1   3    3.70    3.00
  13  -2   3    3.70    3.20
 -13   2   3    1.30    3.50
  -3 -13   3    8.10    4.80
 -13   3   3   -0.60    3.20
  13  -3   3   20.30    4.30
 -13   4   3   -2.20    2.80
  13  -4   3    1.00    2.70
  -4 -13   3    6.80    4.10
  13  -5   3   -4.50    2.50
 -13   5   3   -2.10    2.90
  -5 -13   3    0.30    3.80
  13  -6   3   -0.30    2.70
 -13   6   3   -3.00    3.30
   7  13   3   -5.30    4.30
  13  -7   3   -3.60    2.30
 -13   7   3   -4.60    3.20
  -7 -13   3   -1.80    4.20
   8  13   3    3.40    5.20
  13  -8   3    3.60    2.90
  -8 -13   3   10.60    6.90
 -13   8   3    0.40    4.10
   9  13   3    3.40    4.80
  13  -9   3    3.80    3.10
  -9 -13   3    3.10    4.80
  10  13   3   34.50    7.70
 -10 -13   3   38.20    9.10
 -11 -13   3   18.00    6.90
  11  13   3   17.20    6.30
  12  13   3   34.00    7.60
  13  13   3    5.40    5.30
  14  13   3    0.50    5.10
  14  12   3   77.89   10.70
  14  11   3    9.80    5.70
  14  10   3   -2.80    4.90
  14   9   3    3.10    4.80
  14   8   3    0.80    4.10
 -14  -8   3    0.00    5.00
  14   7   3   58.69    8.80
 -14  -7   3   56.59    9.90
  -7  14   3   52.79   10.00
 -14  -6   3  345.67   21.40
  -6  14   3  351.76   20.90
  14   6   3  350.36   18.80
  -5  14   3    8.00    4.60
  14   5   3    4.00    4.30
 -14  -5   3    4.40    5.10
  -4  14   3   38.60    7.60
  14   4   3   41.30    6.80
 -14  -4   3   45.60    8.60
   3 -14   3   78.09   10.40
  14   3   3   70.49    8.50
 -14  -3   3   62.79    9.50
  -3  14   3   67.39   10.10
   2 -14   3  177.68   14.20
 -14  -2   3  176.38   14.00
  14   2   3  196.38   12.40
  -2  14   3  189.28   15.20
  -1  14   3   -8.60    4.70
 -14  -1   3   -0.70    3.30
   1 -14   3   -2.30    4.50
  14   1   3   -1.20    3.20
   0  14   3  294.17   20.00
  14   0   3  273.37   14.60
   0 -14   3  284.17   19.20
 -14   0   3  294.47   17.90
  -1 -14   3   43.20   10.40
 -14   1   3    6.30    4.40
 -14   2   3   24.60    5.90
  14  -2   3   18.10    4.40
  14  -3   3    8.10    3.50
  -3 -14   3   10.60    6.30
 -14   3   3    8.10    4.60
 -14   4   3  602.04   27.70
  -4 -14   3  607.14   29.30
  14  -4   3  594.24   24.10
  -5 -14   3    9.40    5.00
  14  -5   3    6.50    3.40
 -14   5   3    5.60    4.30
  14  -6   3  750.52   29.60
  -6 -14   3  795.42   36.60
 -14   6   3  801.12   34.20
   7  14   3    1.60    4.80
  -7 -14   3    2.40    4.60
  14  -7   3    3.10    3.20
  -8 -14   3    1.10    6.40
   8  14   3    2.60    4.70
  14  -8   3   -2.00    2.90
   9  14   3   -1.30    4.40
  14  -9   3   -0.10    3.10
  -9 -14   3    3.70    5.50
 -10 -14   3   57.99   10.50
  10  14   3   51.39    8.70
  11  14   3   23.90    7.00
  12  14   3    0.10    5.00
  13  14   3    0.90    5.00
  14  14   3    0.90    5.20
  15  14   3   14.50    7.20
  15  13   3   -4.50    4.90
  15  12   3   -0.10    5.10
  15  11   3    1.10    4.70
  15  10   3   -0.10    4.30
  15   9   3    6.00    4.90
  15   8   3    1.40    4.70
  15   7   3   21.50    6.00
  15   6   3    9.50    5.00
  -6  15   3    7.40    5.30
 -15  -5   3    5.90    4.60
  -5  15   3    3.20    4.50
  15   5   3    0.30    3.90
  15   4   3    4.50    4.50
 -15  -4   3   13.00    5.60
  -4  15   3    0.10    5.20
 -15  -3   3    2.20    4.70
  -3  15   3    0.30    4.60
  15   3   3   -1.50    3.50
 -15  -2   3   -3.10    3.60
   2 -15   3    0.90    4.50
  -2  15   3   -1.00    4.90
  15   2   3    1.00    3.30
  15   1   3   -1.00    3.30
 -15  -1   3   -5.20    3.40
  -1  15   3   -2.10    5.40
   1 -15   3    3.10    5.30
  15   0   3   15.40    4.50
 -15   0   3    9.70    5.40
   0  15   3    9.60    6.40
   0 -15   3   28.40    8.80
  -2 -15   3   29.40    9.40
 -15   2   3   16.90    5.90
  15  -2   3   19.60    4.70
  15  -4   3   -0.40    3.30
  -4 -15   3    1.50    4.60
  -5 -15   3    2.10    4.60
  15  -5   3   -1.20    3.20
  -6 -15   3    7.70    6.20
  15  -6   3    7.30    3.60
  15  -8   3    6.70    3.70
  -8 -15   3   11.30    7.70
   8  15   3   -0.30    4.70
  15  -9   3   17.40    4.60
   9  15   3   13.80    5.90
  10  15   3    6.80    5.30
  11  15   3    1.20    5.40
  12  15   3    1.10    5.00
  13  15   3    2.40    5.30
  14  15   3   20.00    7.10
  15  15   3   10.70    6.60
  16  14   3   79.69   11.50
  16  13   3    6.70    5.70
  16  12   3  266.57   17.80
  16  11   3    2.10    5.20
  16  10   3   45.80    8.10
  16   9   3   13.50    6.00
  16   8   3  423.56   22.00
  16   7   3   13.10    5.40
  16   6   3  323.07   18.10
  16   5   3    3.40    4.30
  -4  16   3   50.69    9.90
  16   4   3   45.90    7.00
  -3  16   3   18.60    8.40
  16   3   3   15.70    5.10
  -2  16   3   -1.70    5.50
  16   2   3    4.80    3.90
  -1  16   3   -3.80    4.90
  16   1   3    1.10    3.50
   0 -16   3  121.49   19.60
  16   0   3  107.49    9.20
  -1 -16   3   12.20    9.20
  16  -1   3    9.40    4.00
  -2 -16   3    9.60    7.20
  16  -2   3    9.30    4.10
  -3 -16   3    6.00    6.40
  16  -3   3    7.00    3.90
  16  -4   3  507.55   21.50
  -4 -16   3  451.25   31.20
  16  -5   3    6.70    3.80
   6  16   3  366.26   20.60
  16  -6   3  355.26   17.50
   7  16   3    2.40    5.30
  16  -7   3   -0.20    3.50
  16  -8   3  103.89    9.50
   8  16   3  119.49   13.10
   9  16   3    8.80    6.30
  10  16   3  426.16   23.30
  11  16   3   -2.70    5.00
  13  16   3    0.20    5.50
  14  16   3   98.59   12.60
  17  13   3   -3.70    4.80
  17  12   3   10.10    6.00
  17  11   3    6.50    5.50
  17  10   3   37.20    7.60
  17   9   3    5.30    5.10
  17   8   3   12.00    5.80
  17   7   3    1.70    4.30
  17   6   3   -0.90    4.20
  17   5   3   22.40    5.80
  17   4   3   19.20    5.40
  17   3   3    0.30    3.60
  17   2   3   16.60    5.20
  -2  17   3    8.90    9.50
  -1  17   3    0.90    5.50
  17   1   3   -1.10    3.70
  17   0   3    3.80    3.70
  17  -1   3   -2.80    3.30
  17  -2   3    7.60    4.10
  17  -3   3   20.10    4.90
  17  -4   3   -4.60    3.50
  17  -5   3   -0.80    3.70
  17  -6   3    5.40    4.20
   6  17   3    7.70    6.10
   7  17   3   17.60    6.60
  17  -7   3    4.30    4.30
  17  -8   3   -2.10    3.70
   8  17   3    0.10    5.00
   9  17   3    3.30    5.20
  10  17   3    8.90    5.90
  11  17   3    2.50    6.20
  12  17   3    0.40    5.60
  13  17   3   21.80    7.40
  18  12   3  131.69   13.10
  18  11   3   -3.70    4.50
  18  10   3   21.30    6.70
  18   9   3   12.20    5.70
  18   8   3  388.26   21.10
  18   7   3    2.50    4.70
  18   6   3  335.47   18.80
  18   5   3   18.90    5.60
  18   4   3   95.99   10.30
  18   3   3    5.80    4.20
  18   2   3  339.77   18.10
  18   1   3    2.20    3.80
  18   0   3    2.70    4.00
  18  -2   3   51.59    7.70
  18  -3   3    5.40    4.10
  18  -4   3   46.80    6.90
  18  -5   3    1.60    4.20
  18  -6   3    5.70    4.40
   6  18   3    4.60    5.70
   7  18   3   -4.50    4.90
  18  -7   3   -3.70    4.10
  18  -8   3    3.60    4.40
   8  18   3    2.70    5.60
  10  18   3  127.19   13.70
  11  18   3   16.10    7.10
  12  18   3    7.30    7.90
  19  10   3    6.60    5.40
  19   9   3   15.60    6.30
  19   8   3    0.30    4.70
  19   7   3   -3.80    4.30
  19   6   3   15.20    5.70
  19   5   3    5.50    5.00
  19   4   3   11.30    5.30
  19   3   3   -1.30    4.10
  19   2   3   -0.40    4.00
  19   1   3   15.20    5.10
  19   0   3   16.60    5.10
  19  -1   3    4.20    4.30
  19  -2   3   14.10    5.00
  19  -3   3   -2.20    4.00
  19  -4   3    0.50    4.30
  19  -5   3   -8.40    4.10
  19  -6   3   -2.00    4.20
  19  -7   3    3.40    4.50
  20   8   3    7.80    5.40
  20   7   3   14.60    5.90
  20   6   3    0.60    4.60
  20   5   3    3.00    4.80
  20   4   3   26.90    6.70
  20   3   3    4.70    4.70
  20   2   3  334.57   18.70
  20   1   3   -4.00    4.20
  20   0   3    7.20    4.80
  20  -1   3    2.90    4.90
  20  -2   3  468.15   22.80
  20  -3   3   14.80    5.70
  20  -4   3  214.88   14.90
  20  -5   3   -4.20    4.10
  20  -6   3    1.30    4.60
  20  -7   3    2.50    4.70
  21   5   3   -4.50    4.20
  21   4   3    4.80    5.00
  21   3   3   -4.00    4.20
  21   2   3    9.40    5.20
  21   1   3   10.90    5.60
  21   0   3   19.60    6.10
  21  -1   3   18.70    6.00
  21  -2   3    7.50    5.20
  21  -3   3   -2.80    4.40
  21  -4   3    2.90    4.90
  21  -5   3    5.20    5.00
  -2   2   4   14.20    2.90
  -2   3   4   74.49    6.00
  -3  -1   4  325.87   14.10
  -3   1   4 1235.28   42.60
  -3   2   4   15.20    3.70
  -3   3   4 1849.91   62.29
  -4  -3   4   74.89    7.40
  -3   4   4   87.69    6.60
  -2   4   4   46.50    5.60
  -4  -2   4   39.40    5.70
  -4  -1   4  122.09    8.60
  -1   4   4  131.39    7.80
  -4   0   4    9.90    3.30
  -4   1   4   45.90    5.40
  -4   2   4    1.20    2.50
  -3  -4   4   26.00    4.20
  -4   3   4   19.30    3.60
  -4   4   4   -1.80    2.50
   4  -4   4    1.20    2.60
  -4  -4   4    6.90    3.00
  -5  -4   4   92.29    8.40
  -4   5   4  105.09    7.90
   4  -5   4   96.79    6.80
   3  -5   4   39.20    5.10
  -3   5   4   44.30    5.50
  -2   5   4   24.20    4.20
  -5  -2   4   23.20    4.40
  -5  -1   4  497.15   20.00
  -1   5   4  450.75   19.00
  -5   0   4   48.20    5.80
   0   5   4   36.90    5.00
  -5   1   4  252.27   13.40
   1   5   4  328.77   13.80
   5  -2   4  164.68    9.90
  -5   2   4  165.18    9.70
   2   5   4  172.58   10.00
  -5   3   4   61.69    6.40
  -3  -5   4   64.99    7.40
   5  -3   4   64.79    6.20
  -4  -5   4   29.60    5.10
  -5   4   4   26.40    4.50
   5  -4   4   25.20    4.40
   5  -5   4  671.93   26.90
  -5   5   4  702.53   28.60
  -5  -5   4  866.01   30.30
   5  -6   4    8.00    2.60
  -6  -5   4    6.20    3.70
  -5   6   4    9.70    3.70
  -4   6   4    5.60    3.30
   4  -6   4    7.30    2.60
  -6  -4   4    2.80    3.80
  -6  -3   4  411.56   19.10
  -3   6   4  417.36   18.20
   3  -6   4  416.56   16.10
  -6  -2   4    8.40    3.50
  -2   6   4    1.50    3.00
  -6  -1   4    5.10    3.10
  -1   6   4    6.80    3.20
   0   6   4    5.20    3.50
   6   0   4    1.40    3.70
  -6   0   4    2.30    2.90
  -6   1   4  209.08   11.60
   1   6   4  207.28   11.70
   6  -1   4  202.28   11.50
  -2  -6   4    3.20    3.10
   2   6   4    2.80    3.40
   6  -2   4    2.90    3.10
  -6   2   4    1.60    2.70
  -3  -6   4   11.60    3.80
   6  -3   4   -0.10    3.00
  -6   3   4   -2.30    2.40
  -6   4   4   -0.20    2.80
  -4  -6   4   13.50    4.30
   6  -4   4   -1.90    2.60
   6  -5   4   84.59    6.90
  -6   5   4  105.29    8.60
  -5  -6   4   96.79    9.10
   6  -6   4    5.50    2.50
  -6  -6   4    1.90    3.50
  -6   6   4    2.50    2.90
  -6   7   4    6.80    3.40
   6  -7   4    2.60    2.40
  -7  -6   4   15.70    4.30
   5  -7   4 1617.54   54.09
  -7  -5   4 1619.44   58.99
  -5   7   4 1646.74   57.69
   4  -7   4   54.69    4.70
  -4   7   4   54.19    7.10
   7   3   4  733.73   30.10
  -7  -3   4  743.13   30.10
  -3   7   4  729.63   28.90
   3  -7   4  748.53   25.80
  -7  -1   4  719.03   28.60
   7   1   4  704.53   28.60
  -1   7   4  708.13   28.10
  -7   0   4  105.59    8.60
   0  -7   4   94.19    8.20
   0  -7   4   86.19    9.30
   7   0   4  101.49    8.90
  -1  -7  -4  808.22   31.70
   7  -1   4  867.81   32.60
  -7   1   4  880.71   33.00
  -1  -7   4  839.12   32.30
   1   7   4  855.71   32.80
  -7   2   4    2.60    3.20
   2   7   4   14.50    4.50
   7  -2   4   10.80    3.70
   7  -3   4    7.30    3.50
  -7   3   4    4.80    3.30
  -3  -7   4    3.30    4.00
  -7   4   4  109.49    8.80
   7  -4   4  118.49    7.80
  -7   5   4    4.90    3.30
  -5  -7   4    4.50    4.10
   7  -5   4    4.40    2.70
  -7   6   4   85.29    8.20
   7  -6   4   75.09    6.10
  -7  -7   4  131.59   11.10
  -7   7   4  116.49    9.60
   7  -7   4  112.99    6.90
   8   7   4   23.00    6.30
  -7   8   4   20.90    5.10
  -8  -7   4   22.50    5.70
   7  -8   4   18.40    3.20
  -6   8   4   12.70    3.80
  -8  -6   4    9.80    4.20
   8   6   4   -2.30    4.20
  -5   8   4    7.80    3.60
  -8  -5   4   11.10    4.80
   8   5   4    7.40    4.70
   8   5   4    9.80    3.10
   5  -8   4    8.20    2.10
  -8  -4   4   23.40    5.70
  -4   8   4   31.40    5.50
   4  -8   4   28.80    3.30
   8   4   4   23.20    5.80
  -8  -3   4  129.49   10.50
  -3   8   4  112.59    9.60
   8   3   4  113.39   10.10
   3  -8   4  121.09    5.80
   8   2   4    0.10    3.70
  -2   8   4   -2.30    3.70
  -8  -2   4   11.50    4.10
  -1   8   4   64.39    8.60
   1  -8   4   93.59   10.70
   8   1   4   84.99    9.00
   1  -8   4   54.59    7.30
  -1  -8   4  138.29   10.20
  -8   1   4  129.99   10.10
  -1  -8   4  139.39   10.80
   8  -1   4  178.08   10.90
   1   8   4  146.49   11.00
   8  -2   4   44.10    6.60
  -3  -8   4   61.79    8.00
  -8   3   4   51.19    6.80
  -4  -8   4    3.30    3.50
  -8   4   4    2.50    3.10
   8  -5   4   26.90    4.20
  -8   5   4   18.60    5.00
  -8   6   4   -1.70    3.30
  -6  -8   4   -0.30    3.90
  -8   7   4   12.00    4.50
   8  -7   4   15.50    3.00
  -7  -8   4   17.50    5.50
   8  -8   4   -0.30    2.10
  -8  -8   4    0.30    3.70
   8   8   4   -1.00    4.70
  -8   8   4    2.60    3.30
   8  -9   4   -0.10    2.70
  -8   9   4   14.90    4.40
  -9  -8   4    5.40    4.00
   9   8   4   -4.10    3.90
   9   7   4   29.00    6.60
  -9  -7   4   34.20    7.00
  -7   9   4   31.60    6.30
   9   6   4   38.60    7.00
  -9  -6   4   47.30    7.90
   9   5   4  550.24   25.90
   9   5   4  561.74   25.80
  -5   9   4  583.94   25.10
   5  -9   4  572.94   22.60
  -9  -5   4  577.04   26.60
   9   4   4   59.59    8.40
   4  -9   4   73.19    6.60
  -4   9   4   56.99    8.00
  -9  -4   4   57.79    8.50
   9   3   4  177.48   12.10
   3  -9   4  170.48   10.60
   3  -9   4  169.68   11.10
  -3   9   4  176.08   12.00
  -9  -3   4  191.28   13.00
   2  -9   4    2.60    3.20
  -9  -2   4    3.10    3.70
  -2   9   4    8.30    4.60
   2  -9   4    1.10    3.90
   9   2   4    2.40    3.70
   1  -9   4  417.86   20.30
  -9  -1   4  443.66   20.80
   9   1   4  446.06   20.10
   1  -9   4  418.66   19.10
   0   9   4    3.90    4.10
   9   0   4    3.80    3.80
  -9   0   4    6.30    3.60
   0  -9   4    5.10    4.40
  -9   1   4  604.14   26.00
   9  -1   4  587.94   24.80
  -1  -9   4  609.94   25.70
   1   9   4  577.64   26.10
  -1  -9   4  623.44   25.40
   9  -2   4   69.99    7.70
  -2  -9   4   67.09    8.30
   2   9   4   87.79   10.60
  -9   2   4   72.09    8.00
  -9   3   4  250.27   14.30
   9  -3   4  261.37   13.20
   9  -4   4   84.79    7.30
  -4  -9   4   86.79   10.00
  -9   4   4   78.99    8.50
  -5  -9   4 1029.50   40.40
   9  -5   4 1001.00   36.10
  -9   5   4  983.90   38.80
   9  -6   4   40.60    5.00
  -6  -9   4   24.80    6.00
  -9   6   4   29.10    5.70
   9  -7   4  227.18   10.60
  -7  -9   4  209.68   15.30
  -9   7   4  231.98   14.10
  -9   8   4   -3.00    3.20
   9  -8   4    1.10    2.20
   8   9   4   -2.70    4.10
  -8  -9   4   -0.10    3.60
   9   9   4    4.50    4.80
  -9  -9   4    4.40    4.30
   9  -9   4   11.00    3.00
  -9   9   4    0.00    3.40
  -9  10   4   23.80    6.60
  10   9   4   25.20    6.70
 -10  -9   4   18.60    6.10
 -10  -8   4    0.90    4.20
  -8  10   4   -1.90    3.10
  10   8   4   -2.30    4.20
 -10  -7   4   15.30    5.90
  -7  10   4   17.20    5.40
  10   7   4   14.40    5.60
  -6  10   4   28.60    6.30
 -10  -6   4   33.70    7.20
  10   6   4   41.20    7.30
  10   5   4   28.90    6.50
  -5  10   4   32.30    6.10
 -10  -5   4   54.59    8.40
 -10  -4   4    1.60    3.60
  10   4   4    0.00    3.70
  -4  10   4    4.20    3.80
  -3  10   4    4.00    3.90
   3 -10   4   -5.60    3.10
  10   3   4   -3.90    3.20
  10   3   4   -2.70    2.50
 -10  -3   4   -2.70    3.00
  -2  10   4   11.00    4.30
 -10  -2   4    0.60    3.20
  10   2   4   -2.60    3.30
   2 -10   4   -7.70    3.40
   1 -10   4   45.80    8.40
  10   1   4   38.20    6.40
  -1  10   4   27.50    6.40
 -10  -1   4   35.40    6.20
   0 -10   4    2.80    5.40
  10   0   4    4.20    4.10
   1  10   4    9.00    5.10
 -10   1   4   -1.50    3.00
  10  -1   4   -6.80    3.10
   2  10   4   -4.70    4.50
  -2 -10   4   -0.80    3.50
  10  -2   4    3.40    3.30
 -10   2   4   -1.40    3.00
  -3 -10   4   79.59    9.90
  10  -3   4   84.89    7.60
 -10   3   4   76.59    8.50
 -10   4   4    5.00    3.60
  -4 -10   4    3.80    4.00
  10  -4   4    4.20    2.90
  -5 -10   4    9.40    4.90
  10  -5   4    4.20    2.90
 -10   5   4    0.50    3.00
  10  -6   4    1.30    2.60
  -6 -10   4    1.70    4.20
 -10   6   4    0.60    3.30
  10  -7   4   67.79    6.00
 -10   7   4   65.19    8.70
  -7 -10   4   66.69   10.50
   8  10   4   28.70    7.20
  10  -8   4   26.00    3.90
  -8 -10   4   28.60    7.10
 -10   8   4   28.20    6.10
 -10   9   4    1.20    3.80
  10  -9   4    2.50    2.80
  -9 -10   4    5.00    4.50
   9  10   4   -0.10    5.00
  10  10   4    1.10    4.80
 -10  10   4    0.20    4.20
 -10 -10   4    5.70    4.80
 -11 -10   4    6.10    5.00
 -10  11   4    1.10    4.10
  11  10   4    8.10    5.40
  11   9   4   72.29   10.10
 -11  -9   4   68.09   10.70
  -9  11   4   66.69    9.60
  11   8   4   12.20    5.70
  -8  11   4    2.40    4.70
 -11  -8   4   10.00    5.90
  -7  11   4  177.38   13.60
  11   7   4  183.68   13.70
 -11  -7   4  201.58   15.70
 -11  -6   4   91.29   11.20
  11   6   4   85.59   10.00
  -6  11   4   82.39    9.70
 -11  -5   4  205.48   14.70
  -5  11   4  187.88   13.80
  11   5   4  200.38   13.90
 -11  -4   4   64.59    8.80
  -4  11   4   56.19    8.60
  11   4   4   39.10    7.10
  -3  11   4   27.00    6.60
 -11  -3   4   19.60    5.50
  11   3   4   17.80    5.20
   3 -11   4   35.90    6.80
  -2  11   4   41.50    7.30
  11   2   4   45.80    6.90
 -11  -2   4   36.80    6.70
   2 -11   4   48.70    7.90
 -11  -1   4    3.50    3.40
   1 -11   4    5.60    5.50
  11   1   4    3.40    3.70
  -1  11   4    6.50    4.30
   0  11   4   41.40    7.40
 -11   0   4   44.00    7.40
   0 -11   4   48.80    9.80
  11   0   4   34.70    6.10
 -11   1   4    0.90    3.20
  -1 -11   4    3.90    4.50
  11  -1   4   -1.40    3.30
   1  11   4    4.70    4.80
  -2 -11   4   11.20    4.50
 -11   2   4    5.40    3.80
  11  -2   4    6.00    3.80
 -11   3   4   32.80    6.40
  -3 -11   4   44.40    7.80
  11  -3   4   34.30    5.40
 -11   4   4   -1.70    3.10
  -4 -11   4   -1.60    4.20
  11  -4   4   -1.80    2.80
  11  -5   4  484.95   19.80
  -5 -11   4  465.45   24.30
 -11   5   4  468.15   22.60
  -6 -11   4   15.30    6.10
  11  -6   4   15.20    3.60
 -11   6   4   13.90    4.50
  -7 -11   4  220.88   16.20
  11  -7   4  197.88   10.50
 -11   7   4  192.28   13.80
   8  11   4   77.59   10.60
 -11   8   4   89.69    9.80
  11  -8   4   86.89    6.80
  -8 -11   4   87.39   11.60
   9  11   4   98.69   11.60
 -11   9   4   97.89   10.50
  11  -9   4  106.99    7.90
  -9 -11   4   98.39   12.10
  10  11   4    8.80    5.60
 -10 -11   4    4.70    5.40
 -11  10   4    6.40    4.40
 -11  11   4  297.07   18.90
  11  11   4  295.17   18.90
  12  11   4   30.20    7.40
 -10  12   4   -3.20    3.90
  12  10   4   19.70    6.70
  -9  12   4   19.70    6.10
 -12  -9   4   23.20    7.20
 -12  -8   4    3.00    5.60
  -8  12   4    7.70    4.50
  -7  12   4    0.60    4.10
  12   7   4   16.70    5.80
 -12  -7   4   -0.30    4.90
 -12  -6   4   18.40    6.10
  -6  12   4   14.40    5.90
  12   6   4   12.10    5.40
  -5  12   4   65.59    9.90
 -12  -5   4   48.70    8.70
   4 -12   4   11.00    5.00
 -12  -4   4    8.90    4.70
   3 -12   4    6.40    4.00
 -12  -3   4   -1.20    3.20
  -3  12   4    1.80    3.90
  -2  12   4   -3.00    3.90
  12   2   4   -1.60    3.50
   2 -12   4    2.10    4.10
 -12  -2   4    0.90    3.50
 -12  -1   4    1.40    3.50
  12   1   4   -1.10    3.50
   1 -12   4    2.60    4.90
  -1  12   4   -6.20    3.90
 -12   0   4    0.00    3.40
   0  12   4    3.10    4.70
   0 -12   4   -1.10    5.50
  12   0   4    5.20    3.90
 -12   2   4   -0.40    3.20
  12  -2   4   -5.10    3.10
  -2 -12   4    8.00    4.10
  12  -3   4    3.80    3.30
 -12   3   4   -2.00    3.00
  -3 -12   4   -2.00    3.60
  12  -4   4   -1.30    2.80
  -4 -12   4    1.20    4.50
 -12   4   4   -0.80    3.10
  -5 -12   4    6.80    5.10
 -12   5   4    5.90    4.20
  12  -5   4    4.30    3.30
  12  -6   4    1.30    3.00
 -12   6   4   -2.50    3.10
  -6 -12   4    4.10    5.30
 -12   7   4   11.10    4.50
  12  -7   4   -0.10    2.60
  -7 -12   4    2.80    4.80
 -12   8   4    6.70    4.20
   8  12   4    4.30    5.30
  12  -8   4    3.30    2.80
  -8 -12   4    2.10    4.70
 -12   9   4    9.00    4.90
   9  12   4   -5.90    4.90
  12  -9   4    4.00    3.50
  10  12   4   -0.90    5.20
 -12  10   4   -1.20    3.80
  11  12   4    1.00    4.90
  12  12   4   14.80    6.30
  13  12   4    5.30    5.20
  13  11   4   21.40    7.20
  13  10   4   -0.60    4.70
  13   9   4   40.50    8.40
  -9  13   4   44.00    8.60
 -13  -8   4    3.90    5.80
  -8  13   4    3.70    4.40
  13   8   4    2.60    4.90
  -7  13   4  445.96   23.80
  13   7   4  424.86   22.40
 -13  -7   4  408.56   24.10
  13   6   4    8.40    4.70
 -13  -6   4    1.60    4.70
  -6  13   4    3.30    5.00
  13   5   4  707.43   31.50
  -5  13   4  766.42   33.60
 -13  -5   4  727.33   33.80
  13   4   4   12.70    5.00
 -13  -4   4    5.30    4.60
  -4  13   4   11.40    5.40
 -13  -3   4    5.10    4.40
  -3  13   4    2.90    4.70
  13   3   4    0.50    3.90
   3 -13   4   -0.10    4.50
 -13  -2   4    1.40    3.60
  13   2   4    0.70    4.00
  -2  13   4    0.60    4.30
   2 -13   4    9.30    5.30
  13   1   4  235.18   14.10
 -13  -1   4  219.88   15.50
  -1  13   4  234.78   16.50
   1 -13   4  232.58   16.70
 -13   0   4    9.40    4.70
   0 -13   4    2.50    6.70
   0  13   4    9.50    6.20
  13   0   4   -0.30    4.00
  -1 -13   4  119.89   13.20
  13  -1   4   85.39    8.70
   1  13   4   78.39   12.30
 -13   1   4  110.39   10.70
  13  -2   4   11.50    4.40
 -13   2   4    7.70    4.20
  -2 -13   4   11.50    5.90
  -3 -13   4   26.90    6.60
 -13   3   4   22.70    5.90
  13  -3   4   23.30    5.10
 -13   4   4   71.09    9.20
  13  -4   4   88.19    8.10
  -4 -13   4   90.89   11.80
 -13   5   4  148.39   12.40
  -5 -13   4  161.78   14.50
  13  -5   4  144.49    9.90
 -13   6   4   39.60    7.30
  13  -6   4   42.80    6.20
  -6 -13   4   48.10   11.80
  13  -7   4   38.20    5.40
 -13   7   4   39.40    7.60
   8  13   4   -6.60    4.80
  13  -8   4    4.60    3.30
 -13   8   4    2.60    4.10
  13  -9   4    5.80    4.40
 -13   9   4    9.50    5.60
   9  13   4    5.00    5.50
  10  13   4   19.80    7.00
  11  13   4   -3.00    4.90
  12  13   4   27.10    7.60
  13  13   4    1.50    5.20
  14  13   4    3.90    5.50
  14  12   4    5.30    5.50
  14  11   4   28.60    7.60
  14  10   4    4.90    5.40
  14   9   4    3.60    5.60
  14   8   4   12.00    6.00
  -8  14   4    7.40    7.10
  -7  14   4   63.79   10.70
 -14  -7   4   54.69   10.20
  14   7   4   55.79    9.10
 -14  -6   4    4.80    4.90
  14   6   4    5.70    4.90
  -6  14   4    6.50    5.30
 -14  -5   4   -2.90    4.10
  14   5   4    2.60    4.30
  -5  14   4    4.70    4.80
  14   4   4    7.30    4.70
 -14  -4   4    2.20    4.40
  -4  14   4    1.10    4.60
  -3  14   4   42.90    9.00
  14   3   4   36.20    6.70
 -14  -3   4   38.50    8.30
  -2  14   4    5.10    5.10
  14   2   4   -4.90    3.60
 -14  -2   4   -2.20    3.70
 -14  -1   4    1.30    4.30
  -1  14   4    6.40    6.40
  14   1   4    9.10    4.40
 -14   0   4    0.40    4.00
  14   0   4   -2.10    3.40
   0  14   4   -1.80    5.50
  14  -1   4    2.60    3.80
 -14   1   4    4.20    4.30
  14  -2   4    3.20    3.80
 -14   2   4   -1.30    3.30
 -14   3   4   16.30    5.40
  14  -3   4   12.80    4.60
  14  -4   4    5.40    3.60
 -14   4   4    4.80    4.30
  14  -5   4   12.80    4.10
 -14   5   4   11.10    5.00
 -14   6   4    3.00    4.10
  14  -6   4    3.30    3.30
 -14   7   4   28.00    6.90
  14  -7   4   20.10    4.50
  14  -8   4   12.80    4.00
   8  14   4   12.70    6.40
   9  14   4   -1.10    4.90
  14  -9   4    7.90    5.40
  10  14   4    0.10    5.20
  11  14   4   -2.40    4.70
  12  14   4   13.50    6.30
  13  14   4   -2.90    5.90
  14  14   4   -1.30    5.40
  15  14   4    7.70    6.70
  15  13   4   89.49   12.80
  15  12   4   25.80    7.80
  15  11   4  181.78   15.50
  15  10   4   -1.80    4.80
  15   9   4    1.30    5.20
  15   8   4   55.69    9.10
  15   7   4   48.80    8.60
  15   6   4   26.00    6.80
  -5  15   4   35.80   11.90
 -15  -5   4   37.20    8.30
  15   5   4   34.60    7.40
  -4  15   4    3.30    5.40
 -15  -4   4   -0.60    4.00
  15   4   4   -2.00    4.00
  15   3   4    0.00    4.20
 -15  -3   4    0.70    3.80
  -3  15   4   -1.80    4.80
  -2  15   4   -0.90    5.80
  15   2   4    8.10    4.50
 -15  -2   4    2.10    4.00
 -15  -1   4  193.38   15.30
  15   1   4  199.08   13.20
  -1  15   4  178.48   20.30
  15   0   4    2.00    3.90
 -15   0   4    3.30    4.50
   0  15   4    8.80    7.60
 -15   1   4   69.29    9.70
  15  -1   4   73.59    8.70
  15  -2   4   -1.70    3.70
 -15   2   4    3.50    4.20
 -15   3   4  129.69   12.10
  15  -3   4  135.79   10.40
  15  -4   4   33.00    5.70
 -15   4   4   25.10    6.60
  15  -5   4  707.23   28.20
  15  -6   4    6.50    3.80
   7  15   4  100.59   11.80
  15  -7   4   82.69    8.30
  15  -8   4   41.10    6.00
   8  15   4   44.60    9.30
   9  15   4  216.48   17.00
  10  15   4    4.60    5.70
  11  15   4   70.59   11.20
  12  15   4   10.80    6.60
  13  15   4   25.50    8.40
  14  15   4    6.60    6.30
  16  13   4    0.90    5.90
  16  12   4   -2.00    5.20
  16  11   4    9.60    6.40
  16  10   4    2.70    5.50
  16   9   4    8.30    6.00
  16   8   4    4.70    5.30
  16   7   4   35.00    8.10
  16   6   4    3.80    5.00
  16   5   4   19.90    6.20
  16   4   4    1.80    4.40
  16   3   4   30.20    6.80
  16   2   4    1.20    4.10
 -16  -2   4   -2.40    5.90
  16   1   4   11.20    4.80
 -16  -1   4   10.90    8.70
  16   0   4   -0.40    4.00
  16  -1   4   -0.10    3.60
  16  -2   4    6.00    4.30
  16  -3   4    2.60    4.00
  16  -4   4    4.10    4.10
  16  -5   4    4.70    4.30
  16  -6   4   -0.60    3.50
   7  16   4   10.90    6.40
  16  -7   4    7.60    4.30
  16  -8   4    2.00    3.70
   8  16   4    3.50    5.80
   9  16   4   28.80    8.30
  10  16   4    4.80    6.30
  11  16   4    1.10    6.00
  12  16   4    0.10    5.90
  13  16   4    5.00    6.40
  17  11   4  127.09   13.50
  17  10   4    4.40    6.00
  17   9   4  123.29   13.20
  17   8   4   30.80    7.90
  17   7   4  707.53   32.20
  17   6   4    8.50    5.40
  17   5   4   47.70    8.20
  17   4   4   15.90    6.00
  17   3   4  111.79   10.90
  17   2   4    9.70    4.90
  17   1   4    0.60    4.00
  17   0   4    4.60    4.00
  17  -1   4    7.20    4.60
  17  -2   4    5.00    4.50
  17  -3   4   20.60    5.40
  17  -4   4   22.60    5.60
  17  -5   4   39.00    6.30
  17  -6   4    3.00    4.00
   7  17   4    5.20    6.10
  17  -7   4    3.80    4.00
  17  -8   4   -3.20    3.80
   8  17   4   -4.00    5.60
   9  17   4  164.68   15.90
  10  17   4    0.10    5.70
  11  17   4  118.19   14.20
  18  10   4   13.70    6.80
  18   9   4   11.50    6.50
  18   8   4    2.70    5.00
  18   7   4    0.50    5.20
  18   6   4   -0.70    4.60
  18   5   4   39.10    7.80
  18   4   4   11.50    5.20
  18   3   4    6.50    5.00
  18   2   4   12.00    5.00
  18   1   4   25.60    6.20
  18   0   4    6.80    4.40
  18  -1   4    1.70    4.10
  18  -2   4    5.10    4.20
  18  -3   4   21.90    5.70
  18  -4   4    2.80    4.50
  18  -5   4    4.00    4.60
   6  18   4    0.70    5.80
  18  -6   4    0.00    4.00
  18  -7   4   -1.20    4.10
  18  -8   4    0.30    4.30
   8  18   4    0.90    6.10
   9  18   4   11.00    7.00
  10  18   4    1.20    5.90
  19   8   4    1.90    5.20
  19   7   4  134.29   13.30
  19   6   4   -3.70    4.20
  19   5   4   23.50    6.50
  19   4   4   23.10    6.70
  19   3   4  292.27   17.90
  19   2   4   23.70    6.40
  19   1   4  211.68   14.70
  19   0   4    4.80    4.80
  19  -1   4   49.40    7.50
  19  -2   4   39.20    7.20
  19  -3   4  225.78   14.70
  19  -4   4    7.90    4.80
  19  -5   4   53.39    7.80
   6  19   4    2.40    6.00
  19  -6   4   -3.30    4.10
  19  -7   4    5.50    4.70
   7  19   4    3.70    6.10
   8  19   4    2.50    6.00
  19  -8   4    2.20    5.00
  20   5   4   12.00    6.00
  20   4   4   -2.30    4.40
  20   3   4    3.30    5.00
  20   2   4   -2.30    4.50
  20   1   4    3.90    5.10
  20   0   4    8.40    5.20
  20  -1   4    3.50    4.80
  20  -2   4    4.70    5.00
  20  -3   4    5.80    4.80
  20  -4   4   -2.80    4.30
  20  -5   4   -0.60    4.40
  -3   0   5  278.37   12.70
  -3   2   5   63.29    5.90
  -3   3   5    9.50    3.30
  -4  -3   5  125.09    9.30
  -3   4   5  173.78    9.70
  -2   4   5  186.78   10.20
  -4  -2   5  179.28   10.40
  -4  -1   5   44.60    5.80
  -4   0   5   -1.10    2.50
  -4   1   5    5.60    2.70
  -4   2   5  265.07   12.80
  -4   3   5   51.89    6.40
  -4   4   5   55.59    6.60
  -4  -4   5   57.99    6.80
  -4   5   5  103.09    8.50
   4  -5   5  107.89    8.00
  -5  -4   5  117.59    9.30
  -5  -3   5  180.18   11.10
  -3   5   5  165.68   10.40
  -5  -2   5   66.19    7.00
  -2   5   5   59.19    6.50
  -1   5   5  149.39    9.40
  -5  -1   5  133.99    9.30
  -5   0   5   98.19    7.90
  -5   1   5   12.80    3.60
  -5   2   5   74.69    7.00
  -5   3   5   15.60    3.90
   5  -3   5   22.60    4.90
   5  -4   5   89.19    7.90
  -5   4   5  114.69    8.90
  -4  -5   5  116.19    9.10
  -5  -5   5   -0.10    3.10
  -5   5   5   -0.70    2.80
   5  -5   5    0.60    3.00
   5  -6   5  277.07   13.00
  -5   6   5  276.07   14.60
  -6  -5   5  264.57   15.50
  -4   6   5  246.38   13.50
   4  -6   5  240.28   12.00
  -6  -4   5  244.18   14.20
  -6  -3   5  219.18   13.00
  -3   6   5  234.78   12.80
   3  -6   5  219.98   11.20
  -2   6   5   10.90    4.20
  -6  -2   5   14.60    4.10
  -1   6   5    9.50    3.90
  -6  -1   5    9.90    3.60
  -6   0   5   45.10    6.40
   0   6   5   47.50    7.30
   1   6   5  203.28   12.20
   6  -1   5  189.38   12.40
  -6   1   5  202.88   11.60
  -6   2   5   -0.50    2.50
   6  -2   5    5.80    3.90
  -6   3   5   51.89    6.50
  -3  -6   5   55.69    7.10
   6  -3   5   60.99    7.30
  -6   4   5   -0.70    2.90
   6  -4   5    5.00    3.10
  -4  -6   5   -1.10    3.10
   6  -5   5   14.90    3.90
  -6   5   5   18.60    4.70
  -5  -6   5   21.10    4.90
  -6   6   5   96.99    9.10
  -6  -6   5  105.89   10.10
   6  -6   5   98.89    7.60
   6  -7   5   24.40    4.00
  -6   7   5   38.20    6.20
  -5   7   5    7.20    3.80
  -7  -5   5    7.90    4.10
   4  -7   5  100.49    6.90
  -7  -4   5  123.69   10.30
  -4   7   5   91.89    8.70
  -7  -3   5    0.10    3.40
   3  -7   5   -2.30    2.40
  -3   7   5   -5.70    3.00
  -7  -2   5  316.37   16.30
  -2   7   5  310.57   16.20
   2  -7   5  324.47   13.60
  -7  -1   5    1.60    3.00
   7   1   5    1.40    4.40
  -1   7   5    7.00    4.00
   2   7   5  206.28   12.80
  -2  -7   5  179.38   12.10
  -7   2   5  181.48   11.30
   7  -2   5  174.68   11.90
  -7   3   5   36.50    5.80
   7  -3   5   49.30    6.70
  -5  -7   5  121.39   10.10
  -7   5   5  109.19    9.70
   7  -5   5  111.99    8.40
  -7   6   5  100.89    9.30
  -6  -7   5  100.69   10.20
   7  -6   5  100.49    7.70
  -7   7   5   37.30    6.50
  -7  -7   5   37.20    7.00
   7  -7   5   27.50    4.20
  -7   8   5    9.20    4.30
  -8  -7   5    8.90    5.10
   8   6   5  218.98   15.60
  -6   8   5  225.48   14.30
  -8  -6   5  234.18   15.60
  -5   8   5   30.50    6.00
  -8  -5   5   34.20    6.60
  -4   8   5  361.36   17.80
  -8  -4   5  341.47   18.20
   8   4   5  303.87   18.30
  -8  -3   5   38.20    6.60
   8   3   5   63.99    9.30
  -3   8   5   43.50    6.90
   8   1   5   96.89   10.10
  -1   8   5   82.09    9.80
  -8  -1   5   83.09    8.50
  -8   0   5  265.87   14.70
   0   8   5  249.48   14.70
   8   0   5  247.98   14.90
  -8   1   5    4.90    3.40
   1   8   5    9.80    4.50
  -2  -8   5  111.59   10.50
   2   8   5  126.89   11.00
  -8   2   5  107.39    9.10
   8  -2   5  114.69    9.50
  -3  -8   5   77.59    9.40
   8  -3   5   76.19    8.20
  -8   3   5   62.89    7.80
  -8   4   5   45.50    6.80
   8  -4   5   47.80    6.60
  -5  -8   5  124.19   11.10
  -8   5   5  117.59   10.30
   8  -5   5  116.99    8.80
   8  -6   5   55.69    6.70
  -8   6   5   59.19    8.30
  -6  -8   5   79.79    9.40
   8  -7   5  176.38   10.00
  -8   7   5  205.18   13.40
  -7  -8   5  185.08   13.70
  -8  -8   5    4.80    4.20
  -8   8   5    3.10    3.70
  -8   9   5   57.19    8.90
   9   8   5   63.29   10.30
  -9  -7   5  188.18   15.40
   9   7   5  170.48   14.90
  -7   9   5  243.48   14.70
  -6   9   5   11.10    4.90
   9   6   5    4.90    5.50
  -9  -6   5    7.20    4.70
   9   5   5   27.30    7.10
  -5   9   5   24.20    5.90
  -9  -5   5   24.60    6.20
   9   4   5   16.70    6.10
  -9  -4   5   21.00    5.50
  -4   9   5   16.80    5.20
  -3   9   5  214.58   14.00
   9   3   5  194.28   14.00
  -9  -3   5  197.78   13.70
  -9  -2   5   70.09    8.50
  -2   9   5   71.49    9.60
   9   2   5   81.59    9.50
  -1   9   5    2.60    4.60
  -9  -1   5    8.70    4.00
   9   1   5   11.70    4.90
  -9   0   5   81.09    8.70
   9   0   5   81.79    9.30
   9  -1   5    3.40    3.90
  -9   1   5    0.10    3.20
   1   9   5    8.90    4.90
   2   9   5  145.89   12.00
   9  -2   5  103.49   10.10
  -9   2   5   93.39    9.30
  -2  -9   5  138.49   11.10
  -4  -9   5  170.78   13.30
   9  -4   5  157.78   10.80
  -9   4   5  151.38   11.40
  -9   5   5    2.50    3.40
   9  -5   5   13.40    4.10
  -5  -9   5    8.50    4.70
  -6  -9   5   72.69    9.90
  -9   6   5   81.89    9.30
   9  -6   5   77.39    7.20
   9  -7   5   -0.80    2.80
  -9   7   5    1.50    3.80
  -7  -9   5    0.90    5.00
  -9   8   5  167.78   12.90
   9   9   5   14.30    6.80
  10   9   5   -1.80    5.10
  10   8   5    2.80    5.40
  10   7   5  109.69   12.30
  -7  10   5  109.59   14.20
  -6  10   5    2.90    4.30
  10   6   5   -3.00    4.70
 -10  -6   5    1.40    4.10
 -10  -5   5  519.25   25.50
  10   5   5  517.25   25.70
  -5  10   5  524.45   24.70
  -4  10   5   10.40    5.00
  10   4   5   13.30    5.70
 -10  -4   5   19.00    5.60
 -10  -3   5  105.69   10.50
  -3  10   5  131.89   12.00
  10   3   5   85.69   10.70
  -2  10   5   20.40    6.30
  10   2   5   18.20    5.80
 -10  -2   5   19.20    5.50
  10   1   5   97.79   10.60
  -1  10   5   90.79   11.00
 -10  -1   5  109.29   10.20
   0  10   5   40.00    7.50
  10   0   5   30.50    6.20
 -10   0   5   30.80    6.50
  -1 -10   5  105.99   10.80
  10  -1   5  104.99    9.90
 -10   1   5  107.39    9.90
   1  10   5  115.29   12.30
  -2 -10   5   13.20    5.00
 -10   2   5    9.70    4.20
  10  -2   5   17.30    4.90
  -3 -10   5   50.49    8.10
  10  -3   5   41.10    6.50
 -10   3   5   48.30    7.60
  -4 -10   5  136.29   12.40
  10  -4   5  104.09    9.10
 -10   4   5   98.69    9.70
  -5 -10   5   20.70    7.20
  10  -5   5   12.80    4.00
 -10   5   5   12.70    4.80
  10  -6   5  293.47   14.20
 -10   6   5  287.37   17.10
  10  -7   5   -2.10    2.70
 -10   7   5   -3.70    3.20
   9  10   5   12.90    6.80
  10  10   5   59.69   10.10
  11  10   5   39.10    9.20
  11   9   5   17.50    6.20
  11   8   5   28.50    7.80
  11   7   5   13.50    6.70
  11   6   5   10.60    5.70
  -5  11   5   15.80    7.60
 -11  -5   5   14.20    6.60
  11   5   5   10.40    6.20
  -4  11   5    7.40    5.30
 -11  -4   5    6.60    4.40
  11   4   5    9.00    5.40
  -3  11   5  111.39   12.70
  11   3   5  112.69   11.30
 -11  -3   5  120.49   11.20
  11   2   5    2.00    4.50
  -2  11   5    4.00    4.50
 -11  -2   5    7.70    4.30
  -1  11   5   37.90    8.30
 -11  -1   5   41.00    7.50
  11   1   5   39.50    7.50
 -11   0   5    7.20    4.40
  11   0   5   14.50    5.40
   0 -11   5    5.80    5.20
   1  11   5   85.39   11.50
  11  -1   5   63.49    9.20
 -11   1   5   76.99    8.90
 -11   2   5    1.10    3.30
  11  -2   5    0.80    3.70
  11  -3   5   72.19    8.40
 -11   3   5   71.19    8.80
 -11   4   5  102.89   10.20
  11  -4   5  112.39    9.20
  11  -5   5    2.40    3.40
 -11   5   5   -1.30    3.40
 -11   6   5   -1.20    3.70
  11  -6   5   -1.80    3.00
  11  -7   5   77.39    7.40
   9  11   5   33.70    9.10
  10  11   5   15.90    7.30
  11  11   5    4.50    5.90
  12  11   5   12.60    6.90
  12  10   5   38.90    8.90
  12   9   5   18.30    7.30
  12   8   5   37.70    8.40
  12   7   5   42.10    8.70
  12   6   5  239.18   16.90
  12   5   5   19.60    6.80
  12   4   5  157.28   13.30
  12   3   5    8.50    5.60
 -12  -2   5    4.60    4.40
  12   2   5    2.10    4.80
  12   1   5  181.58   13.60
 -12  -1   5  172.08   13.60
 -12   0   5   93.49   10.30
  12   0   5   94.39   10.00
  12  -1   5   46.70    7.40
 -12   1   5   45.40    7.60
  12  -2   5   17.40    5.20
 -12   2   5   15.50    5.20
 -12   3   5   35.50    6.90
  12  -3   5   36.30    6.30
  12  -4   5    0.50    3.60
 -12   4   5    2.00    4.60
  12  -5   5  199.58   12.20
  12  -6   5    9.00    4.00
  12  -7   5  198.18   11.40
   9  12   5   23.30    7.80
  10  12   5   52.39   10.00
  11  12   5   44.50    9.80
  12  12   5   20.60    8.00
  13  12   5   -3.30    5.70
  13  11   5   13.40    6.90
  13  10   5    4.30    6.10
  13   9   5   20.00    7.30
  13   8   5   49.40    9.40
  13   7   5   -6.10    4.90
  13   6   5   -1.60    4.90
  13   5   5   26.90    7.50
  13   4   5   51.99    8.90
  13   3   5    0.40    4.60
  13   2   5  138.39   12.70
  13   1   5   11.20    5.60
  13   0   5    6.80    5.10
  13  -1   5   95.39   10.30
  13  -2   5   78.29    9.40
  13  -3   5   47.50    7.20
  13  -4   5    0.40    3.70
  13  -5   5   20.00    5.00
  13  -6   5   91.69    8.50
  13  -7   5   28.30    5.00
   8  13   5    8.50    6.50
   9  13   5   20.50    7.40
  10  13   5   31.10    8.60
  11  13   5    1.80    6.00
  12  13   5    8.00    7.10
  13  13   5   27.10    9.10
  14  13   5   27.40    8.30
  14  12   5   12.70    7.20
  14  11   5   21.70    7.80
  14  10   5    0.80    5.60
  14   9   5    9.70    6.60
  14   8   5   -2.10    5.10
  14   7   5  131.09   13.20
  14   6   5   16.50    6.80
  14   5   5   67.39    9.90
  14   4   5   10.60    5.60
  14   3   5    9.20    5.30
  14   2   5   35.50    7.30
  14   1   5    0.10    4.50
  14   0   5  142.09   12.10
  14  -1   5   -1.10    4.10
  14  -2   5    4.10    4.50
  14  -3   5  104.69    9.90
  14  -4   5  237.68   14.00
  14  -5   5  193.48   12.40
  14  -6   5  178.58   11.40
  14  -7   5    1.90    3.50
   8  14   5    1.30    5.70
   9  14   5   71.59   11.50
  10  14   5   26.50    8.20
  11  14   5   75.59   12.10
  12  14   5    7.90    7.20
  13  14   5   -1.90    6.00
  15  12   5   -3.20    5.30
  15  11   5   25.30    8.10
  15  10   5   43.20    9.10
  15   9   5   32.90    8.30
  15   8   5    2.10    5.40
  15   7   5   -2.10    5.00
  15   6   5   31.80    7.70
  15   5   5    5.30    5.30
  15   4   5   11.00    5.80
  15   3   5   24.40    6.70
  15   2   5   77.39   10.40
  15   1   5    0.60    4.70
  15   0   5   -2.10    4.20
  15  -1   5   17.10    5.60
  15  -2   5  132.89   11.30
  15  -3   5   -0.30    4.10
  15  -4   5   49.00    7.10
  15  -5   5    2.00    3.90
  15  -6   5   38.40    6.10
  15  -7   5    1.90    3.80
   8  15   5   63.09   11.10
   9  15   5    2.80    6.40
  10  15   5    6.90    7.00
  11  15   5   10.00    7.20
  12  15   5    5.20    6.80
  16  10   5   -0.70    5.50
  16   9   5   55.79    9.80
  16   8   5  123.69   13.50
  16   7   5  110.69   12.80
  16   6   5  104.29   12.30
  16   5   5   -7.00    4.70
  16   4   5    0.00    4.60
  16   3   5   39.30    7.60
  16   2   5    4.90    4.90
  16   1   5   28.50    6.80
  16   0   5    9.20    5.20
  16  -1   5    1.00    4.40
  16  -2   5   -0.10    4.10
  16  -3   5   19.90    5.50
  16  -4   5  109.29   10.10
  16  -5   5   30.20    5.90
  16  -6   5   61.19    8.00
  16  -7   5   27.00    7.10
   8  16   5   46.70   10.60
   9  16   5   21.20    8.50
  10  16   5   85.09   13.20
  17   9   5    5.10    6.10
  17   8   5   10.40    6.60
  17   7   5   -0.10    5.30
  17   6   5   49.30    9.40
  17   5   5   25.40    7.30
  17   4   5  110.09   12.10
  17   3   5   -0.40    4.70
  17   2   5   -0.20    4.80
  17   1   5    6.90    5.10
  17   0   5   17.80    5.90
  17  -1   5   26.80    6.20
  17  -2   5   27.90    6.40
  17  -3   5    2.90    4.40
  17  -4   5   62.29    8.80
  17  -5   5    4.50    4.20
  17  -6   5    8.30    4.50
   7  17   5   10.40    7.20
   8  17   5  118.99   14.90
   9  17   5    4.90    6.80
  18   6   5   44.80    8.80
  18   5   5    7.10    5.70
  18   4   5   11.00    6.00
  18   3   5   41.40    8.10
  18   2   5  110.49   11.90
  18   1   5    3.70    4.70
  18   0   5    8.30    5.20
  18  -1   5   18.00    6.00
  18  -2   5   48.60    8.00
  18  -3   5  121.99   11.20
  18  -4   5   26.30    6.00
  18  -5   5   34.90    6.50
  18  -6   5   -2.90    4.00
  19   3   5   10.10    5.60
  19   2   5    1.90    5.00
  19   1   5    3.10    4.90
  19   0   5  109.99   11.30
  19  -1   5    0.50    4.60
  19  -2   5    4.90    4.80
  19  -3   5    4.00    4.50
  -3   4   6   55.59    6.60
  -4  -1   6   87.09    7.10
  -4   3   6   24.50    4.50
  -4   4   6    0.90    3.10
   4  -5   6  190.18   11.60
  -4   5   6  165.88   11.30
  -5  -4   6  183.38   11.70
  -3   5   6    1.90    3.50
  -5  -2   6   33.90    5.40
  -5  -1   6    0.00    2.60
  -5   0   6   27.10    4.70
  -5   1   6   -2.60    2.60
  -5   2   6   93.69    7.90
   5  -3   6   -4.20    4.20
  -5   3   6    3.10    3.20
  -5   4   6   43.80    7.10
   5  -4   6   41.80    6.70
  -5   5   6   10.90    4.90
   5  -5   6    7.30    4.10
  -5  -5   6   10.90    5.00
   5  -6   6    2.50    3.60
   4  -6   6  157.28   12.00
  -4   6   6  149.09   14.60
  -6  -4   6  155.78   17.50
  -6  -3   6  141.39   10.30
   3  -6   6  139.49   11.60
  -3   6   6  138.49   11.30
  -6  -2   6  189.78   11.90
  -2   6   6  189.58   12.40
  -6  -1   6    7.50    3.80
  -1   6   6   11.20    4.90
  -6   0   6  149.09   10.10
  -6   1   6   79.99    7.70
  -6   2   6   43.70    6.60
   6  -2   6   61.09    8.80
   6  -3   6    1.60    4.10
  -6   3   6   -0.20    3.20
   6  -4   6  177.48   11.90
  -6   4   6  176.28   15.00
   6  -5   6   73.09    7.90
   6  -6   6   52.89    8.10
  -2   7   6   -3.20   10.50
  -7  -1   6    0.10    3.60
  -1   7   6    7.50    5.10
   7   1   6   -7.20    4.40
   7   0   6   59.59    9.00
  -7   0   6   60.79    8.80
  -7   1   6    9.30    4.90
   7  -1   6   10.60    5.20
  -7   2   6    5.30    4.80
   7  -2   6    3.00    4.50
   7  -3   6    3.80    4.00
   7  -4   6   39.60    6.40
   7  -5   6    2.00    3.70
   7  -6   6  104.89   10.20
   8   5   6   -5.80    5.00
   8   4   6   16.50    6.80
   8   3   6   98.49   11.70
   8   2   6   31.90    8.00
   8   1   6   90.69   10.50
   8   0   6   13.40    6.00
   8  -1   6   33.90    7.20
   8  -2   6   10.90    5.10
   8  -3   6   89.99    9.50
   8  -4   6  205.08   13.00
   8  -5   6    4.40    4.00
   8  -6   6  107.79   11.40
   9   8   6    0.10    5.80
   9   7   6    2.80    5.80
   9   6   6   53.29   10.00
   9   5   6   -5.50    5.10
   9   4   6   81.79   11.40
   9   3   6   -2.50    5.40
   9   1   6    3.00    5.40
   9  -1   6    5.00    4.90
   9  -2   6   38.90    7.30
   9  -3   6    3.70    4.70
   9  -4   6   69.59    9.10
   9  -5   6    8.90    4.70
   9  -6   6   39.80    7.50
   9   9   6   -4.90    5.90
  10   9   6   32.70    8.70
  10   8   6  225.28   18.30
  10   7   6    0.30    5.30
  10   6   6   40.50    9.00
  10   5   6   13.60    6.80
  10   4   6  207.38   16.00
  10   3   6    5.00    5.70
  10   2   6  540.25   26.70
  10   1   6   23.70    6.90
  10   0   6  106.09   11.40
  10  -1   6    0.30    4.80
  10  -2   6   23.70    6.10
  10  -3   6  107.29   10.60
  10  -4   6  100.79   10.40
  10  -5   6    6.60    4.30
   9  10   6   26.90    8.60
  10  10   6  108.29   13.80
  11  10   6   -3.90    5.80
  11   9   6    0.10    5.90
  11   8   6   28.00    8.50
  11   7   6   16.90    7.40
  11   6   6   83.29   11.80
  11   5   6   23.20    7.70
  11   4   6   12.70    6.50
  11   3   6    2.50    5.50
  11   2   6   13.70    6.70
  11   1   6   10.80    5.70
  11   0   6   55.19    8.90
  11  -1   6    5.20    4.80
  11  -2   6   10.60    5.40
  11  -3   6   -0.10    4.20
  11  -4   6   12.40    5.10
  11  -5   6   -2.60    3.70
   9  11   6    5.10    6.50
  10  11   6   -1.70    6.30
  11  11   6    0.50    5.80
  12  11   6   -2.20    6.30
  12  10   6    1.50    6.00
  12   9   6   24.60    7.90
  12   8   6    0.50    6.60
  12   7   6    7.00    6.60
  12   6   6    1.30    5.60
  12   5   6   15.30    7.00
  12   4   6    7.10    6.00
  12   3   6   53.89    9.70
  12   2   6  201.58   15.80
  12   1   6   -3.40    4.50
  12   0   6   -0.80    4.40
  12  -1   6   20.30    6.10
  12  -2   6  624.34   28.00
  12  -3   6    2.60    4.40
  12  -4   6  211.48   13.80
  12  -5   6   10.70    4.70
   9  12   6   31.10    9.00
  10  12   6   10.30    7.50
  11  12   6    4.90    6.80
  12  12   6    5.80    6.90
  13  11   6   -3.70    5.80
  13  10   6   17.20    8.00
  13   9   6   -0.50    5.70
  13   8   6    2.20    6.10
  13   7   6    2.60    5.90
  13   6   6   -0.90    6.40
  13   5   6    4.20    6.00
  13   4   6   14.00    6.50
  13   3   6   -4.30    5.00
  13   2   6   15.80    6.50
  13   1   6   13.70    6.30
  13   0   6   -1.30    4.80
  13  -1   6   10.20    5.50
  13  -2   6    8.80    5.60
  13  -3   6   17.10    5.60
  13  -4   6   93.19   10.20
  13  -5   6   27.90    5.90
   9  13   6    8.30    7.20
  10  13   6   23.30    8.70
  11  13   6    3.50    6.80
  14  10   6  172.68   16.60
  14   9   6    0.40    5.70
  14   8   6   10.30    7.00
  14   7   6   25.20    7.90
  14   6   6   13.60    7.00
  14   5   6   -3.00    5.50
  14   4   6  118.39   13.40
  14   3   6   34.60    8.50
  14   2   6   65.09    9.80
  14   1   6   15.60    6.30
  14   0   6   -1.30    4.60
  14  -1   6   24.50    6.70
  14  -2   6   53.09    8.20
  14  -3   6   32.90    6.80
  14  -4   6   22.50    6.20
  14  -5   6   -1.10    4.10
   8  14   6  187.98   17.60
   9  14   6    3.50    6.80
  10  14   6    5.90    7.30
  15   8   6   59.69   10.80
  15   7   6   16.50    7.20
  15   6   6   50.09    9.90
  15   5   6    3.10    5.80
  15   4   6    1.70    5.30
  15   3   6    3.50    5.20
  15   2   6    0.50    5.20
  15   1   6   -4.30    4.70
  15   0   6    7.30    5.40
  15  -1   6   -0.90    4.60
  15  -2   6    5.90    5.10
  15  -3   6   10.70    5.30
  15  -4   6   -1.70    3.90
  15  -5   6    5.60    4.50
   8  15   6   31.20    9.40
  16   6   6   25.40    7.90
  16   5   6   50.89    9.70
  16   4   6   68.89   10.50
  16   3   6   -3.90    4.90
  16   2   6   36.10    8.00
  16   1   6   24.20    7.30
  16   0   6  102.59   11.70
  16  -1   6    1.10    4.80
  16  -2   6  144.29   12.60
  16  -3   6   31.80    6.80
  16  -4   6   15.40    5.60
  16  -5   6   -0.70    4.20
  17   3   6    2.60    5.60
  17   2   6   19.20    6.70
  17   1   6   -4.90    4.90
  17   0   6    1.10    5.00
  17  -1   6    6.10    5.20
  17  -2   6   27.30    6.50
  17  -3   6    6.50    5.10
   5  -3   7   53.49    8.50
   5  -4   7    1.50    4.40
   6  -1   7    0.00    5.40
   6  -2   7    2.80    5.00
   6  -3   7    2.70    4.90
   6  -4   7    1.10    4.40
   7   1   7   24.10    7.20
   7   0   7   25.00    7.30
   7  -1   7    0.40    5.00
   7  -2   7   33.80    7.30
   7  -3   7  168.88   13.20
   7  -4   7    3.10    4.20
   8   5   7    2.60    6.00
   8   4   7    1.30    5.90
   8   3   7   29.00    8.60
   8   2   7    7.20    6.00
   8   1   7    3.70    5.70
   8   0   7    7.70    5.70
   8  -1   7    2.20    5.20
   8  -2   7    1.40    5.00
   8  -3   7   25.70    6.60
   8  -4   7   -5.70    4.10
   9   8   7   24.60    8.80
   9   7   7  298.67   21.10
   9   6   7   23.90    8.30
   9   5   7   26.70    8.40
   9   4   7   16.60    7.30
   9   3   7  414.56   24.20
   9   2   7   13.70    6.70
   9   1   7  100.49   12.90
   9   0   7   -0.30    5.20
   9  -1   7    1.60    5.20
   9  -2   7   -6.30    4.80
   9  -3   7    1.60    4.80
   9  -4   7    4.00    4.80
   9   9   7   94.19   13.80
  10   9   7    0.70    7.00
  10   8   7   26.00    9.20
  10   7   7    0.50    6.50
  10   6   7    1.00    6.00
  10   5   7   14.70    8.10
  10   4   7    8.30    7.00
  10   3   7    1.10    6.40
  10   2   7    2.90    6.20
  10   1   7   38.40    8.60
  10   0   7    0.10    5.30
  10  -1   7   -3.00    5.10
  10  -2   7    2.00    5.10
  10  -3   7   13.80    5.70
  10  -4   7    8.50    5.00
   9  10   7   32.20    9.90
  10  10   7    3.40    6.90
  11  10   7   -2.30    6.40
  11   9   7   14.30    8.00
  11   8   7    8.00    7.50
  11   7   7   77.79   12.70
  11   6   7    6.10    6.80
  11   5   7    1.30    6.20
  11   4   7   27.00    8.20
  11   3   7  324.27   20.80
  11   2   7    4.00    5.90
  11   1   7  109.79   13.40
  11   0   7   39.30    8.40
  11  -1   7  140.79   13.30
  11  -2   7   15.60    6.20
  11  -3   7  239.38   16.20
  11  -4   7    0.40    5.40
   9  11   7   60.19   11.80
  10  11   7    5.10    7.50
  12   8   7   -0.80    6.40
  12   7   7   12.70    7.80
  12   6   7    5.00    6.60
  12   5   7    2.80    6.40
  12   4   7    4.00    6.50
  12   3   7    5.00    6.60
  12   2   7    0.90    5.90
  12   1   7    8.40    6.80
  12   0   7    3.60    5.50
  12  -1   7    4.40    5.30
  12  -2   7   -4.40    4.60
  12  -3   7   -1.20    4.50
  13   7   7    0.40    6.60
  13   6   7   10.60    7.10
  13   5   7   29.70    8.90
  13   4   7   -5.50    5.40
  13   3   7   -0.70    5.60
  13   2   7   -1.40    5.30
  13   1   7    4.80    6.00
  13   0   7   17.60    7.00
  13  -1   7  154.38   14.20
  13  -2   7   -1.90    4.70
  13  -3   7  157.18   13.20
  14   5   7    7.10    6.70
  14   4   7    0.10    5.60
  14   3   7   31.00    8.50
  14   2   7    0.20    5.50
  14   1   7   -0.10    5.70
  14   0   7    4.20    5.50
  14  -1   7   12.20    6.30
  14  -2   7   -1.30    4.70
  14  -3   7   -4.60    4.60
   5  -2   8   17.30    7.40
   6   0   8   45.60    9.50
   6  -1   8   13.70    7.10
   6  -2   8    3.50    6.30
   7   2   8   19.70    7.90
   7   1   8   22.60    8.00
   7   0   8    6.90    6.20
   7  -1   8    9.60    6.50
   7  -2   8    5.60    6.50
   8   7   8   17.90    8.30
   8   6   8   24.20    8.90
   8   5   8   23.80    8.40
   8   4   8   25.10    8.70
   8   3   8   62.09   10.80
   8   2   8   11.10    7.30
   8   1   8   27.90    8.60
   8   0   8   -3.30    5.70
   8  -1   8    3.40    5.90
   8  -2   8    4.10    5.80
   9   6   8   46.40   10.80
   9   5   8    1.90    6.40
   9   4   8   12.10    7.30
   9   3   8   -2.80    6.20
   9   2   8   53.89   11.20
   9   1   8   -2.00    6.20
   9   0   8   29.70    8.60
   9  -1   8    1.50    5.80
   9  -2   8    3.00    5.70
  10   5   8    3.30    7.00
  10   4   8   47.20   10.90
  10   3   8   12.50    7.50
  10   2   8  134.39   15.10
  10   1   8   -3.30    5.60
  10   0   8    7.80    6.60
  10  -1   8   45.70    9.30
  10  -2   8   26.60    8.00
  11   2   8    8.80    7.00
  11   1   8   -0.90    5.80
  11   0   8   38.50    9.20
  11  -1   8    5.00    6.20
  11  -2   8    1.60    6.70

_computing_structure_solution     'SHELXT 2014/4 (Sheldrick, 2014)'
;
_shelx_hkl_checksum                85080
_olex2_submission_special_instructions  'No special instructions were received'
_vrf_PLAT029_100
;
PROBLEM: _diffrn_measured_fraction_theta_full value Low
RESPONSE: The experiment was canceled due to technical problems.
;
