# Supplementary material for: Various Approaches to Studying the Phase Transition in an Octamethylcyclotetrasiloxane Crystal: From X-ray Structural Analysis to Metadynamics
Source: Int J Mol Sci. 2022 Aug 13;23(16):9073. doi: 10.3390/ijms23169073 (PMC9408834; doi:10.3390/ijms23169073)
Supplement: Supplementary file 1 [file ijms-23-09073-s001.zip › 1-11_150.cif]

data_150
_audit_creation_date               2021-12-01
_audit_creation_method
;
Olex2 1.5
(compiled 2021.11.18 svn.ra9532c28 for OlexSys, GUI svn.r6429)
;
_shelxl_version_number             2014/6
_audit_contact_author_address      ?
_audit_contact_author_email        ?
_audit_contact_author_name         ''
_audit_contact_author_phone        ?
_publ_contact_author_id_orcid      ?
_publ_section_references
;
Dolomanov, O.V., Bourhis, L.J., Gildea, R.J, Howard, J.A.K. & Puschmann, H.
 (2009), J. Appl. Cryst. 42, 339-341.

Sheldrick, G.M. (2015). Acta Cryst. A71, 3-8.

Sheldrick, G.M. (2015). Acta Cryst. C71, 3-8.
;
_chemical_name_common              ?
_chemical_name_systematic          ?
_chemical_formula_moiety           'C8 H24 O4 Si4'
_chemical_formula_sum              'C8 H24 O4 Si4'
_chemical_formula_weight           296.63
_chemical_melting_point            ?
loop_
  _atom_type_symbol
  _atom_type_description
  _atom_type_scat_dispersion_real
  _atom_type_scat_dispersion_imag
  _atom_type_scat_source
 'C' 'C' 0.0033 0.0016 'International Tables Vol C Tables 4.2.6.8 and 6.1.1.4'
 'H' 'H' 0.0000 0.0000 'International Tables Vol C Tables 4.2.6.8 and 6.1.1.4'
 'O' 'O' 0.0106 0.0060 'International Tables Vol C Tables 4.2.6.8 and 6.1.1.4'
 'Si' 'Si' 0.0817 0.0704 'International Tables Vol C Tables 4.2.6.8 and 6.1.1.4'

_shelx_space_group_comment
;
The symmetry employed for this shelxl refinement is uniquely defined
by the following loop, which should always be used as a source of
symmetry information in preference to the above space-group names.
They are only intended as comments.
;
_space_group_crystal_system        'tetragonal'
_space_group_IT_number             86
_space_group_name_H-M_alt          'P 42/n'
_space_group_name_Hall             '-P 4bc'
loop_
  _space_group_symop_operation_xyz
 'x, y, z'
 '-x+1/2, -y+1/2, z'
 '-y, x+1/2, z+1/2'
 'y+1/2, -x, z+1/2'
 '-x, -y, -z'
 'x-1/2, y-1/2, -z'
 'y, -x-1/2, -z-1/2'
 '-y-1/2, x, -z-1/2'

_cell_length_a                     15.9938(15)
_cell_length_b                     15.9938(15)
_cell_length_c                     6.4099(14)
_cell_angle_alpha                  90
_cell_angle_beta                   90
_cell_angle_gamma                  90
_cell_volume                       1639.7(5)
_cell_formula_units_Z              4
_cell_measurement_reflns_used      3480
_cell_measurement_temperature      150
_cell_measurement_theta_max        30.450
_cell_measurement_theta_min        2.547
_shelx_estimated_absorpt_T_max     0.900
_shelx_estimated_absorpt_T_min     0.840
_exptl_absorpt_coefficient_mu      0.360
_exptl_absorpt_correction_T_max    0.7461
_exptl_absorpt_correction_T_min    0.5418
_exptl_absorpt_correction_type     multi-scan
_exptl_absorpt_process_details
;
SADABS-2014/5 (Bruker,2014/5) was used for absorption correction.
wR2(int) was 0.1587 before and 0.0620 after correction.
The Ratio of minimum to maximum transmission is 0.7262.
The \l/2 correction factor is 0.00150.
;
_exptl_absorpt_special_details     ?
_exptl_crystal_colour              colourless
_exptl_crystal_colour_primary      colourless
_exptl_crystal_density_diffrn      1.202
_exptl_crystal_density_meas        .
_exptl_crystal_density_method      ?
_exptl_crystal_description         irregular
_exptl_crystal_F_000               640
_exptl_crystal_recrystallization_method  'in situ, in 0.3 mm capillary'
_exptl_crystal_size_max            0.5
_exptl_crystal_size_mid            0.3
_exptl_crystal_size_min            0.3
_exptl_transmission_factor_max     ?
_exptl_transmission_factor_min     ?
_diffrn_reflns_av_R_equivalents    0.0444
_diffrn_reflns_av_unetI/netI       0.0576
_diffrn_reflns_Laue_measured_fraction_full  0.989
_diffrn_reflns_Laue_measured_fraction_max  0.990
_diffrn_reflns_limit_h_max         22
_diffrn_reflns_limit_h_min         -16
_diffrn_reflns_limit_k_max         19
_diffrn_reflns_limit_k_min         -20
_diffrn_reflns_limit_l_max         8
_diffrn_reflns_limit_l_min         -9
_diffrn_reflns_number              10212
_diffrn_reflns_point_group_measured_fraction_full  0.989
_diffrn_reflns_point_group_measured_fraction_max  0.990
_diffrn_reflns_theta_full          25.242
_diffrn_reflns_theta_max           30.625
_diffrn_reflns_theta_min           1.801
_diffrn_ambient_temperature        150
_diffrn_detector                   'CCD area detector'
_diffrn_detector_area_resol_mean   8
_diffrn_detector_type              'Bruker SMART CCD 1K area detector'
_diffrn_measured_fraction_theta_full  0.989
_diffrn_measured_fraction_theta_max  0.990
_diffrn_measurement_device         'three-circle diffractometer'
_diffrn_measurement_device_type    'Bruker APEX-II CCD'
_diffrn_measurement_method         '\w and \f scans'
_diffrn_radiation_monochromator    graphite
_diffrn_radiation_probe            x-ray
_diffrn_radiation_type             MoK\a
_diffrn_radiation_wavelength       0.71073
_diffrn_source                     'sealed tube'
_diffrn_source_current             30.0
_diffrn_source_power               1.5
_diffrn_source_target              Mo
_diffrn_source_voltage             50.0
_reflns_Friedel_coverage           0.000
_reflns_Friedel_fraction_full      .
_reflns_Friedel_fraction_max       .
_reflns_number_gt                  1541
_reflns_number_total               2511
_reflns_special_details
;
 Reflections were merged by SHELXL according to the crystal
 class for the calculation of statistics and refinement.
 
 _reflns_Friedel_fraction is defined as the number of unique
 Friedel pairs measured divided by the number that would be
 possible theoretically, ignoring centric projections and
 systematic absences.
;
_reflns_threshold_expression       'I > 2\s(I)'
_computing_cell_refinement         'SAINT v8.34A (Bruker, 2013)'
_computing_data_collection         ?
_computing_data_reduction          'SAINT v8.34A (Bruker, 2013)'
_computing_molecular_graphics      'Olex2 1.5 (Dolomanov et al., 2009)'
_computing_publication_material    'Olex2 1.5 (Dolomanov et al., 2009)'
_computing_structure_refinement    'SHELXL 2014/6 (Sheldrick, 2015)'
_computing_structure_solution      'SHELXT 2014/4 (Sheldrick, 2014)'
_refine_diff_density_max           0.360
_refine_diff_density_min           -0.243
_refine_diff_density_rms           0.065
_refine_ls_extinction_coef         .
_refine_ls_extinction_method       none
_refine_ls_goodness_of_fit_ref     1.034
_refine_ls_hydrogen_treatment      constr
_refine_ls_matrix_type             full
_refine_ls_number_parameters       77
_refine_ls_number_reflns           2511
_refine_ls_number_restraints       0
_refine_ls_R_factor_all            0.0917
_refine_ls_R_factor_gt             0.0472
_refine_ls_restrained_S_all        1.034
_refine_ls_shift/su_max            0.001
_refine_ls_shift/su_mean           0.000
_refine_ls_structure_factor_coef   Fsqd
_refine_ls_weighting_details      
 'w=1/[\s^2^(Fo^2^)+(0.0550P)^2^+0.2905P] where P=(Fo^2^+2Fc^2^)/3'
_refine_ls_weighting_scheme        calc
_refine_ls_wR_factor_gt            0.1120
_refine_ls_wR_factor_ref           0.1295
_refine_special_details            ?
_olex2_refinement_description
;
1.a Idealised Me refined as rotating group:
 C1(H1A,H1B,H1C), C2(H2A,H2B,H2C), C3(H3A,H3B,H3C), C4(H4A,H4B,H4C)
;
_atom_sites_solution_hydrogens     geom
_atom_sites_solution_primary       dual
_atom_sites_solution_secondary     ?
loop_
  _atom_site_label
  _atom_site_type_symbol
  _atom_site_fract_x
  _atom_site_fract_y
  _atom_site_fract_z
  _atom_site_U_iso_or_equiv
  _atom_site_adp_type
  _atom_site_occupancy
  _atom_site_site_symmetry_order
  _atom_site_calc_flag
  _atom_site_refinement_flags_posn
  _atom_site_refinement_flags_adp
  _atom_site_refinement_flags_occupancy
  _atom_site_disorder_assembly
  _atom_site_disorder_group
 Si1 Si 0.43157(3) 0.88539(3) 0.48812(9) 0.02305(17) Uani 1 1 d . . . . .
 Si2 Si 0.61203(3) 0.93490(3) 0.35736(10) 0.02443(18) Uani 1 1 d . . . . .
 O1 O 0.38813(9) 0.97708(8) 0.5144(3) 0.0300(4) Uani 1 1 d . . . . .
 O2 O 0.51818(8) 0.89574(9) 0.3563(3) 0.0315(4) Uani 1 1 d . . . . .
 C1 C 0.35999(12) 0.81874(13) 0.3330(4) 0.0319(5) Uani 1 1 d . . . . .
 H1A H 0.3097 0.8066 0.4149 0.048 Uiso 1 1 calc R U . . .
 H1B H 0.3882 0.7663 0.2974 0.048 Uiso 1 1 calc R U . . .
 H1C H 0.3442 0.8481 0.2047 0.048 Uiso 1 1 calc R U . . .
 C2 C 0.45420(15) 0.84091(14) 0.7491(4) 0.0366(6) Uani 1 1 d . . . . .
 H2A H 0.4928 0.8779 0.8240 0.055 Uiso 1 1 calc R U . . .
 H2B H 0.4798 0.7856 0.7331 0.055 Uiso 1 1 calc R U . . .
 H2C H 0.4020 0.8357 0.8282 0.055 Uiso 1 1 calc R U . . .
 C3 C 0.68491(15) 0.86321(14) 0.4904(5) 0.0440(7) Uani 1 1 d . . . . .
 H3A H 0.7403 0.8892 0.4990 0.066 Uiso 1 1 calc R U . . .
 H3B H 0.6888 0.8108 0.4116 0.066 Uiso 1 1 calc R U . . .
 H3C H 0.6643 0.8515 0.6314 0.066 Uiso 1 1 calc R U . . .
 C4 C 0.64369(15) 0.95213(15) 0.0827(4) 0.0416(6) Uani 1 1 d . . . . .
 H4A H 0.6048 0.9913 0.0164 0.062 Uiso 1 1 calc R U . . .
 H4B H 0.6427 0.8988 0.0075 0.062 Uiso 1 1 calc R U . . .
 H4C H 0.7003 0.9754 0.0788 0.062 Uiso 1 1 calc R U . . .

loop_
  _atom_site_aniso_label
  _atom_site_aniso_U_11
  _atom_site_aniso_U_22
  _atom_site_aniso_U_33
  _atom_site_aniso_U_23
  _atom_site_aniso_U_13
  _atom_site_aniso_U_12
 Si1 0.0194(3) 0.0195(3) 0.0302(4) -0.0045(2) 0.0021(2) -0.0034(2)
 Si2 0.0193(3) 0.0214(3) 0.0325(4) -0.0056(2) 0.0051(2) -0.0011(2)
 O1 0.0278(8) 0.0230(7) 0.0392(11) -0.0089(6) -0.0003(7) 0.0011(6)
 O2 0.0222(7) 0.0319(8) 0.0404(10) -0.0089(7) 0.0079(7) -0.0062(6)
 C1 0.0268(11) 0.0276(11) 0.0413(15) -0.0079(10) -0.0026(10) -0.0060(8)
 C2 0.0417(13) 0.0343(12) 0.0338(15) -0.0015(10) -0.0003(11) 0.0012(10)
 C3 0.0386(14) 0.0361(14) 0.057(2) -0.0137(12) -0.0066(12) 0.0125(11)
 C4 0.0437(14) 0.0442(14) 0.0370(15) -0.0071(12) 0.0148(12) -0.0113(11)

_geom_special_details
;
 All esds (except the esd in the dihedral angle between two l.s. planes)
 are estimated using the full covariance matrix.  The cell esds are taken
 into account individually in the estimation of esds in distances, angles
 and torsion angles; correlations between esds in cell parameters are only
 used when they are defined by crystal symmetry.  An approximate (isotropic)
 treatment of cell esds is used for estimating esds involving l.s. planes.
;
loop_
  _geom_bond_atom_site_label_1
  _geom_bond_atom_site_label_2
  _geom_bond_distance
  _geom_bond_site_symmetry_2
  _geom_bond_publ_flag
 Si1 O1 1.6313(14) . ?
 Si1 O2 1.6311(15) . ?
 Si1 C1 1.853(2) . ?
 Si1 C2 1.853(3) . ?
 Si2 O1 1.6301(15) 5_676 ?
 Si2 O2 1.6264(14) . ?
 Si2 C3 1.844(2) . ?
 Si2 C4 1.853(3) . ?
 O1 Si2 1.6302(15) 5_676 ?
 C1 H1A 0.9800 . ?
 C1 H1B 0.9800 . ?
 C1 H1C 0.9800 . ?
 C2 H2A 0.9800 . ?
 C2 H2B 0.9800 . ?
 C2 H2C 0.9800 . ?
 C3 H3A 0.9800 . ?
 C3 H3B 0.9800 . ?
 C3 H3C 0.9800 . ?
 C4 H4A 0.9800 . ?
 C4 H4B 0.9800 . ?
 C4 H4C 0.9800 . ?

loop_
  _geom_angle_atom_site_label_1
  _geom_angle_atom_site_label_2
  _geom_angle_atom_site_label_3
  _geom_angle
  _geom_angle_site_symmetry_1
  _geom_angle_site_symmetry_3
  _geom_angle_publ_flag
 O1 Si1 C1 108.03(9) . . ?
 O1 Si1 C2 109.56(10) . . ?
 O2 Si1 O1 108.91(8) . . ?
 O2 Si1 C1 107.76(10) . . ?
 O2 Si1 C2 109.91(10) . . ?
 C1 Si1 C2 112.58(11) . . ?
 O1 Si2 C3 107.75(10) 5_676 . ?
 O1 Si2 C4 110.55(10) 5_676 . ?
 O2 Si2 O1 109.46(8) . 5_676 ?
 O2 Si2 C3 110.23(10) . . ?
 O2 Si2 C4 107.79(10) . . ?
 C3 Si2 C4 111.06(12) . . ?
 Si2 O1 Si1 146.01(11) 5_676 . ?
 Si2 O2 Si1 145.16(11) . . ?
 Si1 C1 H1A 109.5 . . ?
 Si1 C1 H1B 109.5 . . ?
 Si1 C1 H1C 109.5 . . ?
 H1A C1 H1B 109.5 . . ?
 H1A C1 H1C 109.5 . . ?
 H1B C1 H1C 109.5 . . ?
 Si1 C2 H2A 109.5 . . ?
 Si1 C2 H2B 109.5 . . ?
 Si1 C2 H2C 109.5 . . ?
 H2A C2 H2B 109.5 . . ?
 H2A C2 H2C 109.5 . . ?
 H2B C2 H2C 109.5 . . ?
 Si2 C3 H3A 109.5 . . ?
 Si2 C3 H3B 109.5 . . ?
 Si2 C3 H3C 109.5 . . ?
 H3A C3 H3B 109.5 . . ?
 H3A C3 H3C 109.5 . . ?
 H3B C3 H3C 109.5 . . ?
 Si2 C4 H4A 109.5 . . ?
 Si2 C4 H4B 109.5 . . ?
 Si2 C4 H4C 109.5 . . ?
 H4A C4 H4B 109.5 . . ?
 H4A C4 H4C 109.5 . . ?
 H4B C4 H4C 109.5 . . ?

loop_
  _geom_torsion_atom_site_label_1
  _geom_torsion_atom_site_label_2
  _geom_torsion_atom_site_label_3
  _geom_torsion_atom_site_label_4
  _geom_torsion
  _geom_torsion_site_symmetry_1
  _geom_torsion_site_symmetry_2
  _geom_torsion_site_symmetry_3
  _geom_torsion_site_symmetry_4
  _geom_torsion_publ_flag
 O1 Si1 O2 Si2 66.0(2) . . . . ?
 O1 Si2 O2 Si1 -33.7(2) 5_676 . . . ?
 O2 Si1 O1 Si2 -79.8(2) . . . 5_676 ?
 C1 Si1 O1 Si2 163.44(18) . . . 5_676 ?
 C1 Si1 O2 Si2 -177.01(17) . . . . ?
 C2 Si1 O1 Si2 40.5(2) . . . 5_676 ?
 C2 Si1 O2 Si2 -54.0(2) . . . . ?
 C3 Si2 O2 Si1 84.7(2) . . . . ?
 C4 Si2 O2 Si1 -153.96(18) . . . . ?

_shelx_res_file
;
TITL 200_a.res in P4(2)/n
REM Old TITL 200 in P4(2)/n
REM SHELXT solution in P4(2)/n
REM R1 0.156, Rweak 0.004, Alpha 0.023, Orientation as input
REM Formula found by SHELXT: C2 O Si
CELL 0.71073 15.9938 15.9938 6.4099 90 90 90
ZERR 4 0.0015 0.0015 0.0014 0 0 0
LATT 1
SYMM 0.5-X,0.5-Y,+Z
SYMM -Y,0.5+X,0.5+Z
SYMM 0.5+Y,-X,0.5+Z
SFAC C H O Si
UNIT 32 96 16 16

L.S. 4
PLAN  5
SIZE 0.3 0.3 0.5
TEMP -123.15
CONF
BOND $H
list 4
fmap 2
acta
MORE -1
OMIT 1 9 0
OMIT 10 14 0
OMIT 4 7 2
OMIT 5 10 1
REM <olex2.extras>
REM <HklSrc "%.\\150.hkl">
REM </olex2.extras>

WGHT    0.055000    0.290500
FVAR       0.44330
SI1   4    0.431565    0.885393    0.488123    11.00000    0.01943    0.01953 =
         0.03020   -0.00455    0.00207   -0.00341
SI2   4    0.612035    0.934895    0.357364    11.00000    0.01931    0.02145 =
         0.03253   -0.00562    0.00508   -0.00106
O1    3    0.388130    0.977077    0.514443    11.00000    0.02778    0.02302 =
         0.03917   -0.00891   -0.00027    0.00109
O2    3    0.518185    0.895739    0.356309    11.00000    0.02216    0.03193 =
         0.04042   -0.00892    0.00788   -0.00618
C1    1    0.359992    0.818744    0.333032    11.00000    0.02679    0.02760 =
         0.04131   -0.00792   -0.00264   -0.00603
AFIX 137
H1A   2    0.309690    0.806637    0.414941    11.00000   -1.50000
H1B   2    0.388196    0.766251    0.297433    11.00000   -1.50000
H1C   2    0.344245    0.848102    0.204716    11.00000   -1.50000
AFIX   0
C2    1    0.454197    0.840912    0.749094    11.00000    0.04166    0.03425 =
         0.03382   -0.00152   -0.00027    0.00116
AFIX 137
H2A   2    0.492753    0.877887    0.823982    11.00000   -1.50000
H2B   2    0.479778    0.785606    0.733060    11.00000   -1.50000
H2C   2    0.402026    0.835724    0.828225    11.00000   -1.50000
AFIX   0
C3    1    0.684910    0.863205    0.490444    11.00000    0.03860    0.03607 =
         0.05720   -0.01370   -0.00659    0.01251
AFIX 137
H3A   2    0.740293    0.889196    0.498970    11.00000   -1.50000
H3B   2    0.688833    0.810846    0.411637    11.00000   -1.50000
H3C   2    0.664330    0.851477    0.631447    11.00000   -1.50000
AFIX   0
C4    1    0.643694    0.952126    0.082659    11.00000    0.04372    0.04416 =
         0.03703   -0.00706    0.01478   -0.01134
AFIX 137
H4A   2    0.604764    0.991288    0.016394    11.00000   -1.50000
H4B   2    0.642721    0.898775    0.007502    11.00000   -1.50000
H4C   2    0.700343    0.975428    0.078781    11.00000   -1.50000
AFIX   0
HKLF 4

REM  200_a.res in P4(2)/n
REM R1 =  0.0472 for    1541 Fo > 4sig(Fo)  and  0.0917 for all    2511 data
REM     77 parameters refined using      0 restraints

END

WGHT      0.0550      0.2905

REM Highest difference peak  0.360,  deepest hole -0.243,  1-sigma level  0.065
Q1    1   0.5358  0.8875  0.4672  11.00000  0.05    0.36
Q2    1   0.6101  0.9396  0.5302  11.00000  0.05    0.34
Q3    1   0.4306  0.8824  0.6288  11.00000  0.05    0.33
Q4    1   0.6633  0.8999  0.4042  11.00000  0.05    0.32
Q5    1   0.6445  0.8941  0.4827  11.00000  0.05    0.32
;
_shelx_res_checksum                55427
_shelx_hkl_file
;
   0   1   0   -4.00    0.20
   0  -1   0   -2.90    0.30
   1   1   0    2.50    0.40
  -1   1   0    3.20    0.50
  -1  -1   0    1.80    0.30
  -1   1   0    1.70    0.30
  -1  -1   0    2.00    0.50
   1  -1   0    3.10    0.30
  -2  -1   0   -7.20    0.90
   2   1   0   -7.10    1.20
   1  -2   0   -6.50    1.10
  -1   2   0   -5.80    1.10
  -2  -1   0   -4.90    1.30
   0  -2   0 3579.14  141.19
  -2   0   0 3560.34  142.49
   0  -2   0 3761.92  139.79
   2   0   0 3623.54  142.79
   2   0   0 3666.83  140.49
   0   2   0 3629.04  141.69
  -2   0   0 3688.93  140.59
   1   2   0   -1.70    0.80
  -1  -2   0   -0.20    0.90
   1   2   0    0.00    0.30
   2   2   0  148.89    7.00
   2  -2   0  149.29    6.70
   2  -2   0  153.18    6.40
  -2  -2   0  148.79    7.10
  -2   2   0  151.88    6.70
   2   2   0  147.89    6.40
   3   2   0   -0.70    0.60
  -3  -2   0   -1.40    0.80
   2  -3   0   -0.40    0.70
   3   2   0   -1.30    0.80
  -2   3   0   -1.40    0.60
   2  -3   0   -1.10    0.60
   3   1   0    2.30    0.80
   1  -3   0    1.80    0.80
  -3  -1   0    1.10    1.00
  -1   3   0    1.00    0.90
   3   1   0    0.30    0.90
  -1   3   0    0.30    0.60
   1  -3   0    0.90    0.90
   0  -3   0   -0.60    0.60
   0   3   0    0.20    0.60
  -3   0   0   -0.20    0.50
   0  -3   0   -0.40    0.60
   0   3   0   -1.30    0.50
   3   0   0    0.30    0.50
   3   0   0   -0.10    0.40
   3  -1   0    0.20    0.50
  -1  -3   0   -0.20    0.70
   3  -1   0   -0.30    0.30
  -1  -3   0   -0.20    0.80
  -3   1   0   -0.30    0.50
   1   3   0   -0.30    0.50
   3  -2   0   -0.40    0.60
   2   3   0   -0.60    0.60
   3  -2   0   -0.70    0.70
   3   3   0    2.40    1.40
   3   3   0    5.20    1.10
  -3  -3   0    4.00    1.80
  -4  -3   0    4.80    1.80
   3  -4   0   -1.10    0.90
   3  -4   0   -0.50    1.00
   4   3   0   -0.60    1.30
   4   3   0   -0.80    0.80
  -3   4   0   -0.70    0.90
   4   2   0 9709.93  373.46
   2  -4   0 9999.00  372.76
   2  -4   0 9584.84  375.56
  -4  -2   0 9694.73  379.16
  -2   4   0 9802.62  376.66
   4   2   0 9567.74  379.26
   1  -4   0   -0.20    1.10
  -1   4   0    1.90    1.50
   1  -4   0    1.20    1.10
  -4  -1   0    0.30    1.30
   0  -4   0 5317.77  201.78
   4   0   0 5301.97  206.88
   0   4   0 5508.95  201.58
   4   0   0 5194.88  202.68
  -4   0   0 5312.97  207.18
   0  -4   0 5116.59  203.68
   0   4   0 5143.69  205.38
   4  -1   0   -1.70    1.10
  -4   1   0   -1.20    1.00
  -2  -4   0  235.18   11.10
   2   4   0  241.28    9.80
   2   4   0  242.18   10.90
  -4   2   0  222.98   10.30
   4  -2   0  212.48   10.40
   4  -2   0  224.58    9.70
  -4   3   0   -1.40    0.80
   3   4   0   -0.90    1.10
  -3  -4   0   -0.30    1.10
   3   4   0   -0.20    0.80
   4  -3   0    0.00    1.00
   4  -3   0   -0.20    0.80
  -4   4   0 1164.48   45.40
   4   4   0 1125.69   46.10
   4  -4   0 1157.38   44.80
   4  -4   0 1146.69   45.40
   4   4   0 1125.39   44.70
  -4  -4   0 1146.59   46.30
   5   4   0   -1.10    1.10
  -4   5   0   -1.50    1.00
   5   4   0   -2.10    1.50
   4  -5   0   -0.20    1.10
  -5  -4   0   -1.80    1.40
   5   3   0    9.40    2.40
  -3   5   0    8.90    1.90
   3  -5   0   10.80    1.90
   5   3   0    9.30    1.60
  -5  -3   0    5.80    2.00
   3  -5   0    6.40    1.80
   5   2   0   -2.90    1.30
   2  -5   0   -2.20    1.20
  -2   5   0   -3.30    1.20
   2  -5   0   -2.60    1.10
  -5  -2   0   -4.30    1.20
   5   2   0   -2.80    0.90
  -1   5   0    1.90    1.70
   5   1   0    5.00    1.40
   5   1   0    3.70    2.00
   1  -5   0    3.20    1.70
   1  -5   0    4.80    1.70
  -5  -1   0    3.20    1.70
   5   0   0    0.50    1.30
   5   0   0    0.30    0.80
   0  -5   0    1.80    1.60
   0  -5   0    1.80    1.40
   0   5   0    0.10    1.40
  -5   0   0    1.20    1.10
  -1  -5   0   15.00    2.60
   5  -1   0   17.20    1.90
   5  -1   0   13.10    2.20
  -5   1   0   13.30    2.10
  -1  -5   0   18.10    2.60
  -1  -5   0   17.80    2.40
  -5   2   0    0.20    0.90
  -2  -5   0    2.30    1.80
  -2  -5   0    1.90    1.70
   5  -2   0    0.20    0.90
   5  -2   0   -0.10    1.10
   3   5   0   56.29    4.50
  -3  -5   0   47.50    4.50
   5  -3   0   49.20    3.40
   5  -3   0   43.10    3.90
  -5   3   0   44.50    3.70
   3   5   0   58.99    3.40
   5  -4   0   -1.20    1.00
   4   5   0    0.30    1.40
   4   5   0   -2.00    0.90
  -4  -5   0    0.30    1.30
  -5   4   0   -0.70    1.10
   5  -4   0   -0.30    1.00
  -5   5   0    7.70    2.00
  -5  -5   0    6.20    2.60
   5  -5   0    6.20    1.70
   5   5   0    7.90    2.40
   5  -5   0    8.20    2.10
   5   5   0    7.70    1.60
  -6  -5   0    0.30    1.60
   5  -6   0    0.00    1.30
   6   5   0    4.90    1.90
   5  -6   0   -1.10    1.50
  -5   6   0   -1.10    1.20
   4  -6   0 1109.79   44.30
  -6  -4   0 1066.69   45.30
  -4   6   0 1084.79   44.40
   6   4   0 1085.89   43.50
   4  -6   0 1148.99   43.80
   6   4   0 1135.09   45.50
   3  -6   0   -1.60    1.20
   6   3   0   -0.60    1.40
   6   3   0   -2.40    0.90
   3  -6   0   -1.00    1.20
  -6  -3   0   -0.90    1.40
  -3   6   0   -1.30    1.10
  -2   6   0 1865.51   73.39
   2  -6   0 1921.11   72.69
  -6  -2   0 1881.11   73.89
   2  -6   0 1870.51   73.19
   6   2   0 1847.22   72.39
   6   2   0 1863.51   73.89
  -1   6   0   -2.40    1.20
  -6  -1   0   -3.30    1.20
   1  -6   0   -2.90    1.20
   6   1   0   -2.40    1.40
   6   1   0   -2.00    0.90
   1  -6   0   -3.20    1.30
  -6   0   0   94.09    5.90
   0  -6   0   85.29    5.40
   6   0   0   94.29    6.00
   0   6   0   87.29    6.00
   6   0   0   98.39    4.90
   0  -6   0   91.09    5.90
  -1  -6   0   -4.70    1.90
  -1  -6   0   -3.80    1.70
   6  -1   0   -2.70    0.90
  -6   1   0   -2.70    1.30
   6  -1   0    1.10    1.60
  -1  -6   0   -4.50    1.60
  -6   2   0    3.00    1.60
  -2  -6   0   -1.30    2.40
   6  -2   0    2.60    1.90
  -2  -6   0    5.90    2.40
  -2  -6   0    7.30    2.60
   6  -2   0    1.00    1.30
  -6   3   0   -2.00    1.10
   3   6   0   -0.40    1.10
  -3  -6   0    1.20    1.90
   6  -3   0   -1.30    1.10
   3   6   0   -1.90    1.20
  -6   4   0  963.50   37.00
   4   6   0  861.91   35.90
  -4  -6   0  844.92   37.70
   6  -4   0  977.80   37.30
   4   6   0  877.71   37.60
   6  -4   0  917.81   36.10
   5   6   0    0.10    1.40
  -6   5   0   -0.60    1.20
   6  -5   0   -0.70    1.30
  -5  -6   0    0.10    1.70
   5   6   0   -3.00    1.20
   6  -5   0   -0.30    1.30
  -6  -6   0  142.39    9.30
   6   6   0  145.29    9.10
  -6   6   0  137.99    8.10
   6   6   0  138.89    7.30
   6  -6   0  141.39    8.20
   6  -6   0  154.38    7.90
  -7  -6   0    0.50    2.00
   6  -7   0   -1.50    1.60
   7   6   0    2.30    1.60
   6  -7   0   -1.70    1.70
   7   6   0   -0.20    1.70
  -6   7   0   -1.60    1.50
  -5   7   0   -1.60    1.40
   5  -7   0   -3.00    1.40
  -7  -5   0   -1.40    1.70
   7   5   0   -1.80    1.30
   7   5   0   -0.20    1.90
   5  -7   0   -0.90    1.80
  -4   7   0   -1.20    1.30
   7   4   0   -0.50    1.70
   4  -7   0    0.20    1.40
   4  -7   0   -1.00    1.80
   7   4   0    0.80    1.20
  -7  -4   0    0.70    1.80
  -3   7   0   16.10    2.90
   3  -7   0   17.40    2.70
   3  -7   0   12.70    2.70
  -7  -3   0   28.40    3.80
   7   3   0   14.60    2.20
   7   3   0   17.70    3.20
   2  -7   0   -0.60    1.70
   2  -7   0    4.70    1.80
   1  -7   0    2.10    1.80
   7   1   0    3.10    1.70
  -1   7   0    2.20    1.80
  -7  -1   0    3.30    1.60
   7   1   0    3.10    1.20
   1  -7   0    3.90    1.90
   7   0   0    2.00    1.60
  -7   0   0    6.20    1.70
   7   0   0    0.90    1.00
  -1  -7   0   36.60    4.30
   7  -1   0   16.80    3.00
  -1  -7   0   24.50    3.30
  -7   1   0   26.90    3.30
  -1  -7   0   32.80    4.30
   7  -1   0   23.70    2.50
  -2  -7   0   -0.40    2.30
   7  -2   0   -0.20    1.00
  -2  -7   0   -1.00    1.90
   7  -2   0   -0.90    1.40
  -2  -7   0   -1.30    1.90
  -7   2   0   -0.80    1.10
   3   7   0    6.20    1.60
   7  -3   0    5.70    1.60
  -3  -7   0    4.90    2.30
  -7   3   0    3.80    1.80
   7  -3   0    4.20    1.90
  -3  -7   0    7.70    3.20
   7  -4   0   -1.10    1.40
  -4  -7   0    2.50    2.30
  -7   4   0    1.70    1.60
   4   7   0    0.20    1.70
  -5  -7   0    4.10    2.30
   7  -5   0    1.90    1.60
  -7   5   0    1.00    1.60
   5   7   0    1.80    1.50
   5   7   0    1.20    2.10
   7  -5   0    1.50    1.80
   7  -6   0   -3.00    1.50
   7  -6   0   -3.70    1.50
  -7   6   0   -2.40    1.40
   6   7   0   -2.00    1.60
  -6  -7   0    0.70    2.20
  -7   7   0   30.70    4.30
   7   7   0   29.20    4.80
   7   7   0   34.10    3.70
   7  -7   0   35.30    4.30
  -7  -7   0   28.30    4.70
   7  -7   0   30.50    4.50
  -8  -7   0    2.20    2.70
   8   7   0   -0.30    1.60
   8   7   0   -0.40    2.10
   7  -8   0   -2.20    2.00
  -7   8   0   -2.40    1.70
   7  -8   0    1.10    2.40
   8   6   0  447.56   21.60
  -8  -6   0  442.36   21.70
   6  -8   0  440.36   20.40
  -6   8   0  441.26   20.50
   6  -8   0  472.45   20.00
   8   6   0  438.56   19.20
   5  -8   0   -3.00    1.90
  -5   8   0   -3.50    1.90
   8   5   0   -1.90    1.50
   8   5   0   -2.70    2.10
   5  -8   0    0.70    2.20
  -8  -5   0   -2.30    1.90
   4  -8   0 1936.21   76.29
  -8  -4   0 1918.51   77.39
   8   4   0 1947.21   77.69
  -4   8   0 1914.41   76.59
   8   4   0 1944.41   75.29
   4  -8   0 1939.11   75.79
   8   3   0   -1.50    1.60
  -3   8   0   -0.80    1.60
  -8  -3   0   -1.60    1.70
   8   3   0    1.20    1.40
   3  -8   0   -2.10    1.50
   3  -8   0   -1.40    1.70
  -2   8   0  963.80   40.50
   8   2   0  980.60   41.00
   2  -8   0 1001.70   40.10
   2  -8   0  976.40   39.50
   8   2   0  968.60   38.90
  -8  -2   0  977.80   40.80
  -8  -1   0    0.40    1.80
   8   1   0   -0.30    1.70
   8   1   0   -0.30    1.00
   1  -8   0   -0.50    1.70
   1  -8   0    0.60    1.80
  -1   8   0   -0.70    1.80
  -8   0   0  103.59    7.00
   0  -8   0  106.29    6.60
   0  -8   0  120.39    7.40
   8   0   0  101.39    5.70
   0   8   0   95.79    7.20
   8   0   0  100.79    7.30
  -8   1   0   -2.40    1.40
   8  -1   0    0.00    1.10
  -1  -8   0   -0.90    1.90
  -1  -8   0    2.00    2.30
   8  -1   0   -0.60    1.60
  -1  -8   0   -2.20    1.90
   8  -2   0  313.87   13.50
  -2  -8   0  293.17   15.30
  -2  -8   0  303.47   15.20
  -2  -8   0  302.97   14.60
   8  -2   0  304.17   15.10
  -8   2   0  318.07   14.70
   8  -3   0   -0.10    1.70
   8  -3   0   -0.90    1.50
  -3  -8   0   -0.30    2.10
   3   8   0    1.90    1.60
  -3  -8   0    3.00    2.60
  -8   3   0   -0.80    1.50
  -4  -8   0  696.43   30.50
  -8   4   0  694.53   29.20
   8  -4   0  668.13   29.60
  -4  -8   0  696.13   30.00
   8  -4   0  691.83   28.30
   4   8   0  691.63   28.00
   5   8   0   -0.80    1.40
  -5  -8   0    2.70    2.60
   8  -5   0    0.20    1.80
   8  -5   0    0.50    1.70
  -8   5   0   -2.20    1.40
   5   8   0   -1.40    2.00
  -6  -8   0    2.20    3.10
   6   8   0    3.30    1.90
   6   8   0    4.50    2.70
   8  -6   0    4.20    2.30
   8  -6   0    2.50    2.30
  -8   6   0    2.30    2.00
   8  -7   0   -1.30    1.90
   7   8   0   -0.70    2.10
   7   8   0   -1.40    1.60
  -8   7   0   -1.50    1.90
  -7  -8   0   -1.10    2.70
   8  -7   0   -1.20    2.00
   8   8   0 1510.95   64.99
   8   8   0 1570.64   62.49
   8  -8   0 1635.84   63.39
   8  -8   0 1588.64   64.19
  -8  -8   0 1615.24   65.89
  -8   8   0 1575.24   64.09
   8  -9   0   -2.20    2.20
   8  -9   0   -5.50    2.80
   9   8   0   -0.40    2.30
   9   8   0    0.40    2.80
  -8   9   0    1.90    2.70
  -9  -8   0    0.10    3.10
   9   7   0   23.80    5.10
  -9  -7   0   26.50    5.50
   9   7   0   21.10    3.60
   7  -9   0   39.80    5.50
  -9  -6   0    1.60    2.90
   6  -9   0   -2.90    1.90
   9   6   0   -4.30    2.20
   6  -9   0   -4.60    2.70
  -6   9   0   -1.90    2.00
   9   6   0    1.80    2.00
   9   5   0   13.40    4.00
   5  -9   0   12.20    3.40
  -5   9   0   13.90    3.50
   9   5   0   11.50    2.50
   5  -9   0   10.90    3.50
  -9  -5   0   14.80    3.60
   4  -9   0   -3.30    1.70
  -4   9   0   -1.60    2.00
   4  -9   0   -3.60    2.30
   9   4   0    0.10    2.10
  -9  -4   0    4.80    2.40
   9   4   0    3.20    1.60
   3  -9   0    6.50    2.50
  -3   9   0    7.70    2.70
   9   3   0    5.30    2.50
  -9  -3   0    3.40    2.40
   9   3   0    8.00    2.10
  -9  -2   0   -0.60    1.70
   2  -9   0   -2.30    2.00
  -2   9   0    1.70    1.90
   9   2   0   -0.70    1.80
   9   2   0    2.00    1.50
   2  -9   0    0.50    2.20
  -1   9   0   26.90    4.40
   9   1   0   36.50    5.10
   1  -9   0   33.40    4.10
  -9  -1   0   29.70    4.40
   9   1   0   31.20    3.30
   1  -9   0   35.70    4.70
   0  -9   0   -3.40    1.90
   0  -9   0   -4.50    2.20
   9   0   0   -0.40    1.40
   0   9   0   -5.30    2.20
   9  -1   0  142.89    7.70
   9  -1   0  147.39    9.40
  -2  -9   0   -0.20    2.90
  -9   2   0    0.50    1.60
  -2  -9   0   -0.20    2.30
   9  -2   0   -0.50    1.70
   9  -2   0   -0.80    1.50
  -3  -9   0    0.90    3.20
   9  -3   0    2.90    2.50
   3   9   0    1.10    2.00
  -3  -9   0   -1.40    3.40
   9  -3   0    4.00    1.90
  -9   3   0    3.60    2.20
   9  -4   0   -1.20    1.90
  -9   4   0   -2.60    1.60
   4   9   0   -0.10    1.80
  -4  -9   0   10.50    3.50
  -4  -9   0    1.40    3.20
   9  -5   0    5.40    2.50
   9  -5   0    6.50    2.60
  -9   5   0    5.30    2.50
   9  -6   0   -1.60    1.90
  -9   6   0   -2.60    1.70
   6   9   0   -1.40    2.20
  -6  -9   0   -0.60    2.80
   9  -6   0   -4.50    1.90
   6   9   0    2.20    1.90
   9  -7   0    4.40    2.80
   7   9   0    5.80    2.20
  -9   7   0   -0.70    2.30
   7   9   0    3.10    3.10
  -7  -9   0    0.40    4.00
   9  -7   0   -1.50    2.50
   9  -8   0   -0.10    2.70
  -9   8   0    0.20    2.40
  -9   9   0    2.20    2.60
   9  -9   0    2.20    2.80
  -9  -9   0    3.40    3.80
   9   9   0    1.80    2.60
   9   9   0    1.20    3.10
   9  -9   0    1.10    3.30
   9 -10   0   -4.10    2.70
  10   9   0    4.40    3.40
  -9  10   0   -0.20    2.80
   9 -10   0   -0.30    3.30
 -10  -9   0   -4.30    3.00
   8 -10   0 1290.07   51.39
  10   8   0 1221.58   53.29
   8 -10   0 1255.87   51.99
  -8  10   0 1244.38   52.09
 -10  -8   0 1241.08   53.59
  10   8   0 1215.18   49.99
  10   7   0   -2.80    2.70
 -10  -7   0   -2.80    2.70
   7 -10   0   -1.20    2.40
  -7  10   0    2.00    2.70
  10   7   0    2.20    2.30
  10   6   0  627.44   26.50
  10   6   0  645.34   29.70
   6 -10   0  634.84   27.70
   6 -10   0  616.64   28.00
  -6  10   0  622.54   28.30
 -10  -6   0  624.94   29.40
  -5  10   0    1.50    2.40
   5 -10   0   -2.90    2.30
  10   5   0   -3.20    2.70
 -10  -5   0   -4.40    2.70
  10   5   0   -1.90    1.70
   5 -10   0    1.10    2.70
 -10  -4   0 2387.06   95.09
   4 -10   0 2421.36   93.09
  10   4   0 2426.06   92.39
  10   4   0 2358.86   95.19
  -4  10   0 2316.77   94.09
   4 -10   0 2320.77   93.69
   3 -10   0   -4.50    2.70
  10   3   0    8.20    3.00
  -3  10   0    3.00    3.00
   3 -10   0   -1.40    2.20
 -10  -3   0    4.80    2.60
  10   3   0    0.20    1.60
   2 -10   0 2803.92  110.39
   2 -10   0 2777.42  109.59
  10   2   0 2811.12  108.89
  -2  10   0 2840.92  111.19
  10   2   0 2773.12  111.49
 -10  -2   0 2884.01  111.39
 -10  -1   0   -1.40    2.20
   1 -10   0   10.00    3.20
  10   1   0   -0.80    2.40
   1 -10   0   -6.20    2.80
  -1  10   0    0.00    2.70
  10   1   0   -0.40    1.60
   0 -10   0   55.19    6.50
 -10   0   0   42.30    5.40
  10   0   0   30.90    5.00
   0 -10   0   33.80    4.80
  10   0   0   33.20    3.80
  -1 -10   0   11.00    3.70
 -10   1   0   -3.50    1.90
  10  -1   0   -1.10    1.60
  -1 -10   0   -7.90    3.30
  10  -1   0   -2.00    2.10
  -1 -10   0    4.00    3.00
  10  -2   0  199.18   12.30
 -10   2   0  209.18   11.90
  -2 -10   0  218.48   12.70
  -2 -10   0  218.78   13.20
  10  -2   0  204.88   10.40
  -2 -10   0  233.18   12.30
   3  10   0    0.90    1.70
  -3 -10   0   -2.80    3.60
  -3 -10   0   -4.60    3.10
  10  -3   0    1.60    2.50
 -10   3   0   -0.60    1.90
  10  -3   0   -3.00    1.80
 -10   4   0  240.48   13.40
  10  -4   0  235.18   14.10
  -4 -10   0  300.67   15.40
   4  10   0  269.87   12.30
  -5 -10   0    2.80    3.00
   5  10   0    2.40    1.90
  -5 -10   0   -1.60    3.10
 -10   5   0   -1.20    2.10
  10  -5   0    0.20    2.10
  10  -5   0   -0.50    2.10
  10  -6   0   56.19    6.90
  -6 -10   0   57.89    8.30
 -10   6   0   51.49    6.30
   6  10   0   48.90    5.30
  10  -6   0   53.29    5.80
  -7 -10   0   -3.80    3.30
  10  -7   0   -3.80    2.30
   7  10   0   -2.30    2.50
   7  10   0    7.60    2.50
 -10   8   0  210.48   12.30
  10  -8   0  206.08   12.90
  10  -8   0  198.48   11.70
   8  10   0  194.38   10.60
  -8 -10   0  202.28   14.30
   8  10   0  198.88   13.40
   9  10   0    1.60    3.60
 -10   9   0    0.30    2.70
  10  -9   0   -1.50    3.00
   9  10   0   -1.70    2.30
  10  -9   0    4.80    3.10
  -9 -10   0   -0.30    3.60
  10  10   0   13.90    4.60
  10  10   0   16.30    3.60
 -10 -10   0   22.30    5.80
  10 -10   0   20.30    5.00
  10 -11   0   -5.20    3.00
  11  10   0    3.80    2.50
  11   9   0   25.50    3.90
   9 -11   0   23.10    5.00
 -11  -9   0   22.80    5.50
  11   8   0   -1.80    2.80
   8 -11   0   -3.00    3.50
  -8  11   0   -2.80    2.50
 -11  -8   0   12.80    4.30
  11   8   0   -3.40    2.40
   8 -11   0   -3.50    2.60
   7 -11   0   -0.30    2.50
  11   7   0    0.10    2.20
  11   7   0   -1.80    2.90
  -7  11   0   -1.00    2.80
   7 -11   0   -7.10    3.40
 -11  -7   0   -4.00    2.70
  -6  11   0    0.40    2.70
   6 -11   0   -1.80    2.40
  11   6   0   -0.10    2.90
  11   6   0   -1.30    2.20
 -11  -6   0    0.00    2.70
   6 -11   0    0.90    3.20
   5 -11   0   35.00    4.90
   5 -11   0   34.70    5.10
  -5  11   0   37.00    5.50
 -11  -5   0   33.30    5.90
  11   5   0   37.00    4.70
  11   5   0   30.10    5.60
  11   4   0    0.10    2.00
  11   4   0   -3.30    2.90
 -11  -4   0   -2.70    2.80
   4 -11   0   -5.70    2.40
 -11  -3   0    6.30    3.50
  11   3   0    1.70    3.50
  -3  11   0    1.00    3.60
   3 -11   0   10.90    4.00
  11   3   0    7.60    2.50
   3 -11   0    0.80    3.30
   2 -11   0    0.90    3.40
  11   2   0    3.00    2.80
 -11  -2   0    3.70    2.90
 -11  -1   0    3.10    2.80
  11   1   0    3.70    3.20
  11   1   0    6.70    2.40
  -1  11   0    3.50    3.00
   1 -11   0    5.70    3.30
   1 -11   0   -2.60    3.40
  11   0   0   -1.80    1.70
   0 -11   0   -2.10    2.80
   0 -11   0   -5.30    2.90
  11   0   0   -3.10    2.60
 -11   0   0   -1.40    2.20
 -11   1   0    3.50    2.40
  -1 -11   0   -1.50    3.00
  -1 -11   0   -3.50    3.50
  -1 -11   0   -2.50    3.20
  11  -1   0   -0.30    1.80
  11  -1   0    1.90    2.80
 -11   2   0   -0.50    2.30
  11  -2   0    2.30    2.20
  11  -2   0    1.80    2.60
   3  11   0   17.70    3.10
  -3 -11   0   16.90    4.90
  11  -3   0   14.10    4.00
  11  -3   0   10.90    3.00
  -3 -11   0    6.00    4.90
 -11   3   0   10.00    3.60
 -11   4   0   -4.00    2.40
  11  -4   0   -4.70    2.20
  11  -4   0   -7.10    3.00
  -4 -11   0    1.40    4.20
  -4 -11   0    4.90    4.90
  11  -5   0   52.59    7.10
 -11   5   0   50.69    6.10
  11  -5   0   40.20    5.40
  11  -6   0   -0.30    2.80
  -6 -11   0   13.50    4.10
  11  -6   0    4.10    2.70
  -6 -11   0   10.60    4.00
 -11   6   0   -3.40    2.20
  -7 -11   0   11.60    5.10
  -7 -11   0   27.90    6.10
  11  -7   0   22.20    5.00
 -11   7   0   16.70    4.20
   7  11   0   20.30    3.50
   8  11   0   -3.00    2.30
  -8 -11   0   -1.20    3.60
 -11   8   0    8.20    3.40
  11  -8   0    1.40    2.90
   8  11   0   -0.90    3.00
  11  -8   0    2.00    3.10
  11  -9   0    7.40    3.50
   9  11   0    8.60    2.80
   9  11   0   11.00    4.40
  -9 -11   0    0.90    3.80
  10  11   0   -1.90    2.20
  11 -10   0   -0.20    3.30
  11  11   0   -0.20    2.20
  11 -11   0   -1.50    3.50
  12  11   0    1.10    2.60
  11 -12   0   -2.20    3.70
  12  10   0   26.80    4.10
  10 -12   0   22.90    5.40
   9 -12   0   -0.40    3.40
  12   9   0   -0.50    2.20
   8 -12   0   -0.50    3.50
  12   8   0    6.10    2.80
  12   7   0    1.60    2.40
 -12  -7   0   -0.10    2.90
   7 -12   0   -2.20    3.50
  -7  12   0    0.40    3.10
  12   7   0   -1.40    3.00
  12   6   0  419.36   22.30
  -6  12   0  391.46   20.70
 -12  -6   0  438.86   22.30
   6 -12   0  403.56   20.40
   6 -12   0  406.66   20.20
  12   6   0  408.26   18.80
   5 -12   0   -1.00    2.60
  -5  12   0    4.70    3.10
   5 -12   0    0.30    3.20
  12   5   0   -2.50    3.30
  12   5   0   -1.30    2.10
 -12  -5   0    0.90    3.10
 -12  -4   0   40.40    6.50
  -4  12   0   36.90    6.00
   4 -12   0   33.90    5.10
  12   4   0   37.00    4.60
   4 -12   0   36.90    5.50
  12   4   0   32.30    6.20
 -12  -3   0   -1.90    2.60
   3 -12   0   -4.20    2.90
   3 -12   0   -1.40    2.80
  -3  12   0   -5.10    2.90
  12   3   0   -2.20    3.00
  12   3   0    0.20    2.10
  12   2   0 1428.06   61.29
   2 -12   0 1429.96   59.89
 -12  -2   0 1496.85   60.99
  -2  12   0 1475.25   61.09
   2 -12   0 1476.15   59.19
  12   2   0 1470.85   58.29
  12   1   0   -1.20    2.10
   1 -12   0   -1.50    3.30
 -12  -1   0   -1.90    2.80
  -1  12   0    0.40    2.80
  12   1   0   -0.10    3.00
   0 -12   0  152.38   10.60
  12   0   0  170.58    9.30
  12   0   0  150.18   11.60
 -12   0   0  163.08   11.00
   0 -12   0  155.48   11.30
  -1 -12   0   -7.00    4.50
  12  -1   0    0.20    3.00
  12  -1   0   -4.40    2.10
  -1 -12   0    2.30    4.00
  -1 -12   0   -1.30    4.00
 -12   1   0   -2.60    2.60
  12  -2   0 2523.05  100.49
  -2 -12   0 2560.34  101.59
 -12   2   0 2673.63  102.49
  12  -2   0 2528.95  103.29
  -2 -12   0 2577.94  102.49
  -2 -12   0 2597.94  103.19
   3  12   0    1.10    2.30
  12  -3   0    1.70    2.50
 -12   3   0   -2.20    2.50
  -3 -12   0   -1.30    3.50
  -3 -12   0    4.20    4.40
  12  -3   0   -3.00    2.70
   4  12   0  314.07   14.70
  12  -4   0  333.37   15.70
 -12   4   0  328.17   16.90
  -4 -12   0  314.87   18.10
  -4 -12   0  314.87   19.40
  12  -4   0  315.77   18.00
   5  12   0    6.20    2.50
  -5 -12   0    2.90    4.20
  -5 -12   0    7.80    4.50
 -12   5   0   -3.10    2.40
  12  -5   0   -4.60    2.40
  12  -5   0   -2.60    3.20
 -12   6   0  600.44   26.70
  -6 -12   0  566.84   28.40
  -6 -12   0  552.24   27.60
   6  12   0  580.44   24.60
  12  -6   0  556.64   27.60
  12  -6   0  586.14   25.70
  12  -7   0    1.40    3.00
   7  12   0    1.70    2.30
  -7 -12   0   -3.90    3.60
  12  -8   0 1126.09   47.60
   8  12   0 1131.09   46.10
  -8 -12   0 1158.48   50.69
  12  -9   0    1.20    3.20
   9  12   0    1.30    2.50
  12 -10   0  105.89    9.70
  10  12   0  119.19    8.00
  11  12   0   -3.40    2.40
  12  12   0   29.20    4.60
  12 -12   0   32.70    6.50
  13  12   0   -2.90    2.60
  12 -13   0    1.50    4.30
  11 -13   0   -2.30    4.10
  13  11   0   -1.40    2.60
  10 -13   0   -0.60    3.80
  13  10   0   -0.60    2.60
  13   9   0   11.00    3.20
   9 -13   0    6.90    4.60
   8 -13   0   -6.30    3.40
  13   8   0   -4.00    2.30
   7 -13   0    3.40    3.80
  13   7   0   17.50    3.40
   6 -13   0   -8.00    3.20
  13   6   0    1.90    2.50
   5 -13   0    4.70    4.00
  -5  13   0   11.80    4.40
 -13  -5   0   16.70    5.50
  13   5   0   11.10    3.00
   5 -13   0   13.30    5.40
  13   4   0   -2.20    2.00
  13   4   0   -0.70    3.40
 -13  -4   0   -2.90    2.60
   4 -13   0   -3.20    3.10
   4 -13   0   -0.90    2.60
  -4  13   0    0.30    3.40
 -13  -3   0   24.00    5.20
  -3  13   0   21.70    5.70
   3 -13   0   24.90    5.00
  13   3   0   24.40    5.20
  13   3   0   22.80    3.90
   3 -13   0   24.40    5.00
  -2  13   0    1.40    3.80
 -13  -2   0    3.50    3.10
   2 -13   0   10.30    4.00
  13   2   0    1.40    2.90
  13   2   0   11.80    2.90
 -13  -1   0    0.90    2.90
  13   1   0    1.40    3.30
  13   1   0   -4.40    2.20
   1 -13   0    9.10    4.00
   1 -13   0    4.80    3.90
  13   0   0    5.50    3.60
  13   0   0   -0.90    2.50
   0 -13   0    4.80    3.40
 -13   0   0    1.50    3.00
   0 -13   0    1.20    3.80
   0 -13   0    1.30    4.40
  -1 -13   0    6.80    3.70
  -1 -13   0    2.40    4.90
  13  -1   0   -2.70    3.20
  13  -1   0    3.50    2.60
 -13   1   0   -3.00    3.10
 -13   2   0   -0.30    2.90
  13  -2   0    2.20    3.50
  13  -3   0   -0.10    3.10
   3  13   0   17.90    3.30
  13  -3   0    3.70    3.80
 -13   3   0    2.80    3.30
  -3 -13   0   20.40    5.70
  -3 -13   0   19.20    5.20
  -4 -13   0    8.70    5.90
 -13   4   0   -1.40    3.50
  -4 -13   0    9.00    4.40
  13  -4   0   -2.30    2.90
   4  13   0   -1.50    2.40
   5  13   0   41.30    4.90
  -5 -13   0   53.89    8.20
  -5 -13   0   64.79   10.10
  13  -5   0   47.00    5.90
  -6 -13   0    3.80    3.70
  13  -6   0    0.30    2.80
   6  13   0    0.90    2.40
  -7 -13   0    7.20    4.40
   7  13   0    7.90    2.90
  13  -8   0    9.60    3.90
   8  13   0   -1.30    2.60
  13  -9   0   22.00    5.10
   9  13   0   21.70    4.00
  10  13   0   -0.80    2.50
  13 -10   0    7.00    4.20
  11  13   0   14.80    3.60
  13 -11   0   23.20    5.70
  13 -12   0    0.20    4.30
  12  13   0    1.10    2.70
  13  13   0   -1.10    2.90
  13 -13   0   -0.70    4.50
  13 -14   0    2.00    5.00
  14  13   0   -1.10    2.90
  12 -14   0   22.10    6.30
  14  12   0   14.60    4.10
  11 -14   0   -3.90    4.20
  14  11   0   -2.90    2.80
  14  10   0  706.23   30.80
  10 -14   0  708.93   33.30
  14   9   0    2.10    2.90
   9 -14   0   -0.70    4.00
   8 -14   0  146.09   11.30
  14   8   0  140.19    9.30
   7 -14   0   -3.70    3.50
  14   7   0    0.20    2.50
  14   6   0  109.09    7.80
   6 -14   0  108.99    9.80
   5 -14   0   -2.50    3.60
  14   5   0    0.50    2.50
  14   4   0  317.77   15.40
   4 -14   0  306.47   16.70
  14   3   0   -1.20    2.30
  -3  14   0   -6.60    3.90
   3 -14   0   -5.70    3.30
   2 -14   0   10.50    4.20
  -2  14   0   10.00    4.40
   2 -14   0    9.50    4.90
  14   2   0    6.60    2.90
  14   1   0    1.40    2.50
   1 -14   0    0.50    3.70
   1 -14   0    7.10    3.90
   0 -14   0   47.50    7.50
   0 -14   0   63.69    8.40
   0 -14   0   58.09    7.20
  14   0   0   45.50    5.40
  14  -1   0   -2.50    2.50
  -1 -14   0    0.80    3.30
  -1 -14   0   -4.60    4.30
  -1 -14   0   -3.40    3.40
  -2 -14   0  518.55   26.30
  -2 -14   0  513.15   25.20
   2  14   0  499.15   21.90
  14  -2   0  515.55   23.20
  -3 -14   0   -0.40    4.00
   3  14   0   -0.70    2.20
  -3 -14   0   -2.80    4.10
  14  -3   0    2.10    2.70
  -4 -14   0  212.88   14.40
   4  14   0  152.18    9.20
   5  14   0   -0.70    2.50
  -5 -14   0   -1.30    4.20
  14  -5   0   -3.50    2.90
   6  14   0  177.58    9.90
  14  -6   0  172.28   11.40
  -6 -14   0  178.58   14.10
  14  -7   0   -3.70    3.00
   7  14   0   -2.50    2.30
   8  14   0  279.57   14.70
  14  -8   0  329.17   17.00
   9  14   0    0.20    2.50
  14  -9   0   -1.10    3.70
  10  14   0   73.09    6.90
  14 -11   0   -1.80    4.10
  11  14   0    1.00    2.70
  12  14   0  464.95   21.30
  14 -12   0  446.16   24.40
  14 -13   0   -0.70    4.70
  13  14   0    1.00    3.10
  14  14   0  401.76   19.60
  14 -14   0  396.16   23.40
  15  14   0   -4.70    3.00
  15  13   0   -3.50    3.10
  15  12   0   -4.90    3.10
  12 -15   0   -7.60    6.80
  11 -15   0   13.00    6.50
  15  11   0   16.00    4.10
  15  10   0   -3.30    2.90
  10 -15   0   -2.10    5.00
  15   9   0    4.10    3.30
   9 -15   0   -2.20    4.70
  15   8   0    0.90    2.70
   8 -15   0   -0.90    4.60
   7 -15   0   23.60    6.20
  15   7   0   29.20    4.80
  15   6   0    1.30    2.90
   6 -15   0   -4.60    4.40
  15   5   0    1.40    2.80
   5 -15   0    6.00    5.20
  15   4   0   -2.10    2.50
  15   3   0   -1.90    2.40
  15   2   0   -2.70    2.40
  15   1   0    1.10    2.60
   0 -15   0   -0.10    4.20
  15   0   0    0.80    2.50
  15  -1   0   23.10    4.20
  -1 -15   0   12.80    4.80
  -2 -15   0   10.70    4.60
  15  -2   0    1.30    2.80
  -3 -15   0    0.70    4.80
  15  -3   0   -3.10    2.80
  15  -4   0   -0.30    3.00
  -4 -15   0   -8.40    4.90
  15  -5   0    4.00    3.50
  15  -7   0   -1.20    3.30
  15  -8   0   -0.40    3.50
  15  -9   0    9.80    4.60
  15 -10   0   -5.20    4.00
  15 -11   0    7.00    4.80
  15 -12   0   -0.60    4.80
  15 -13   0   12.60    6.10
  15 -14   0    2.30    5.30
  16  14   0   38.30    6.30
  16  13   0   -4.30    3.20
  16  12   0   15.30    4.40
  16  11   0   -1.30    3.00
  16  10   0  225.58   13.30
  16   9   0   -4.50    2.90
  16   8   0  110.29    8.80
  16   7   0   -2.40    2.70
  16   6   0  117.69    8.90
  16   5   0   -0.80    2.90
  16   4   0  493.85   22.90
  16   3   0    2.80    2.90
  16   2   0   89.99    7.80
   1 -16   0    1.20    4.50
  16   1   0    0.90    2.60
  16   0   0  334.67   17.50
   0 -16   0  373.06   21.60
  16  -1   0   -1.50    2.90
  -1 -16   0    2.90    4.00
  -2 -16   0  236.88   19.40
  16  -2   0  219.58   13.10
  16  -3   0   -4.80    2.90
  16  -4   0   24.60    5.10
  16  -5   0   -5.20    2.90
  16  -6   0    9.00    4.20
  16  -7   0    0.90    3.70
  16  -8   0   -3.50    3.80
  16  -9   0   -6.50    3.90
  16 -10   0   60.49    8.90
  16 -11   0   -4.00    4.50
  16 -12   0  176.58   14.80
  16 -13   0    3.30    5.10
  16 -14   0   75.29   10.90
  17  14   0   -2.10    6.00
  17  13   0   -0.40    3.70
  17  12   0   -4.70    3.30
  17  11   0    0.30    3.60
  17  10   0   -5.00    3.10
  17   9   0   -0.90    3.20
  17   8   0   -2.20    3.10
  17   7   0   12.30    4.30
  17   6   0   -1.00    3.30
  17   5   0   13.90    4.00
  17   4   0   -0.10    3.00
  17   3   0    3.30    3.40
  17   2   0    2.70    3.30
  17   1   0    2.90    3.40
  17   0   0   -2.60    3.10
  17  -1   0   -3.90    3.30
  17  -2   0   -3.60    3.60
  17  -3   0   13.00    4.50
  17  -4   0   -2.30    3.60
  17  -5   0    3.00    4.30
  17  -6   0   -1.40    3.50
  17  -7   0    7.10    4.30
  17  -8   0    4.90    4.30
  17  -9   0   -6.80    3.90
  17 -10   0   -4.00    4.30
  17 -11   0   16.20    5.80
  17 -12   0    2.10    5.30
  17 -13   0    6.30    6.00
  17 -14   0   -0.90    5.90
  18  13   0   -2.70    4.00
  18  12   0   29.10    5.80
  18  11   0    0.80    3.90
  18  10   0  147.89   11.10
  18   9   0    0.30    3.50
  18   8   0   -1.30    3.40
  18   7   0    0.30    3.50
  18   6   0    6.00    3.80
  18   5   0   -1.70    3.70
  18   4   0    3.80    3.90
  18   3   0   -4.00    3.20
  18   2   0   86.59    8.80
  18   1   0    0.50    3.50
  18   0   0  222.68   13.90
  18  -1   0    2.30    3.60
  18  -2   0  255.07   15.40
  18  -3   0    0.70    4.00
  18  -4   0    4.60    4.40
  18  -5   0    1.80    4.00
  18  -6   0  190.38   13.60
  18  -7   0    1.60    4.70
  18  -8   0  148.99   13.00
  18  -9   0  -10.40    4.60
  18 -10   0   -1.60    5.00
  18 -11   0    4.70    5.70
  18 -12   0   95.79   12.40
  18 -13   0   -1.90    6.10
  18 -14   0    5.50    6.90
  19  12   0    0.80    4.10
  19  11   0    1.00    4.20
  19  10   0    0.20    4.10
  19   9   0   23.60    5.60
  19   8   0   15.50    4.60
  19   7   0    7.70    4.30
  19   6   0   -2.90    3.80
  19   5   0    0.00    3.70
  19   4   0   -0.60    3.70
  19   3   0   -2.60    3.60
  19   2   0   -1.80    3.60
  19   1   0    1.60    3.80
  19   0   0    5.20    4.10
  19  -1   0   -6.50    3.80
  19  -2   0   -7.60    3.50
  19  -3   0    6.30    4.40
  19  -4   0   -0.70    3.90
  19  -5   0    4.80    4.60
  19  -6   0    2.00    4.30
  19  -7   0   -3.30    4.20
  19  -8   0   -5.50    4.60
  19  -9   0   -2.30    5.00
  19 -10   0   -5.20    5.40
  19 -11   0   11.20    6.30
  19 -12   0    1.20    5.80
  20  11   0    0.10    4.40
  20  10   0  378.26   20.80
  20   9   0   -2.20    4.10
  20   8   0   33.10    6.50
  20   7   0   -2.20    4.00
  20   6   0  312.67   17.90
  20   5   0   -1.40    3.90
  20   4   0  181.08   13.20
  20   3   0   -6.00    3.80
  20   2   0   14.70    4.90
  20   1   0   -7.90    3.80
  20   0   0   41.50    7.10
  20  -1   0    7.90    4.60
  20  -2   0   -4.90    4.00
  20  -3   0   -1.10    4.20
  20  -4   0    3.50    4.50
  20  -5   0   -3.50    4.40
  20  -6   0   37.70    7.70
  20  -7   0   -9.00    4.70
  20  -8   0   11.60    6.50
  20  -9   0   -2.80    5.30
  20 -10   0  132.39   14.30
  20 -11   0   14.10    6.70
  21   9   0   10.10    5.40
  21   8   0   -1.60    4.60
  21   7   0   18.60    6.10
  21   6   0   -0.10    4.40
  21   5   0   -1.90    4.40
  21   4   0   -4.40    4.40
  21   3   0    2.80    4.80
  21   2   0    2.70    4.60
  21   1   0   -0.30    4.40
  21   0   0   -0.60    4.30
  21  -1   0    4.20    5.00
  21  -2   0   -3.90    4.50
  21  -3   0   12.50    5.80
  21  -4   0   -0.20    4.70
  21  -5   0    1.50    4.90
  21  -6   0    0.10    5.50
  21  -7   0   19.70    6.70
  21  -8   0    2.20    5.60
  21  -9   0    1.00    5.60
  22   6   0  153.78   12.90
  22   5   0    0.20    4.90
  22   4   0   53.39    8.30
  22   3   0    2.30    5.10
  22   2   0  124.89   12.10
  22   1   0   -1.60    4.90
  22   0   0  260.17   17.50
  22  -1   0    0.40    5.30
  22  -2   0   77.29   10.50
  22  -3   0   -2.30    5.30
  22  -4   0   32.30    7.80
  22  -5   0    4.50    5.80
  22  -6   0  126.99   13.50
   0   0   1   -0.60    1.10
   0   1  -1  673.23   27.10
   0  -1  -1  732.33   27.80
   1   0  -1  691.73   27.00
  -1   0   1  661.23   26.90
   0  -1   1  698.83   27.10
   1   1  -1 5922.91  227.88
   1  -1  -1 5902.61  227.48
   1   1  -1 5892.61  226.38
  -1   1  -1 6034.90  226.58
   1  -1  -1 5953.40  227.88
  -1  -1  -1 5953.00  226.48
  -1   1   1 5983.20  227.18
  -1  -1   1 5624.74  228.28
   1  -1   1 5748.92  226.48
  -1  -1   1 5961.50  225.28
  -2  -1  -1   61.49    4.40
   2   1  -1   61.19    3.10
   1  -2  -1   50.19    3.70
   1  -2  -1   54.89    3.10
   2   1   1   53.29    3.00
  -1   2   1   53.79    3.10
   0  -2  -1   44.30    2.70
   0   2  -1   52.69    2.90
   2   0  -1   48.60    3.00
   2   0  -1   49.00    3.00
   0  -2  -1   43.70    3.70
   0  -2   1   50.89    2.90
  -2   0   1   48.40    3.00
   0   2   1   45.10    2.80
   0  -2   1   48.40    2.60
   1   2  -1  239.48    9.90
   2  -1  -1  242.48   10.60
  -1  -2  -1  265.87   10.40
   2  -1  -1  254.47   10.70
  -1  -2  -1  262.27   11.40
  -1  -2  -1  240.58   10.20
  -1  -2   1  240.48    9.80
  -2   1   1  250.57   10.50
   2  -1   1  240.08   10.20
   1   2   1  238.28   10.30
  -2  -2  -1  265.07   13.00
  -2   2  -1  267.37   11.40
   2   2  -1  326.67   11.50
   2  -2  -1  305.07   12.40
   2   2  -1  273.37   12.20
   2  -2  -1  290.97   12.00
  -2  -2  -1  257.27   11.70
  -2  -2  -1  280.57   11.90
   2  -2   1  267.67   11.40
  -2   2   1  294.87   11.90
   2   2   1  279.17   11.90
   2  -2   1  270.07   11.30
  -2  -2   1  271.07   12.20
  -3  -2  -1 1790.52   71.09
   2  -3  -1 1877.01   69.89
  -3  -2  -1 1825.42   69.99
   2  -3  -1 1815.12   70.29
   3   2  -1 1804.32   70.39
  -2   3  -1 1833.72   69.09
   3   2  -1 1849.91   69.29
  -2   3  -1 1711.33   69.39
   2  -3   1 1733.23   69.39
  -2   3   1 1801.42   69.79
  -3  -2   1 1810.82   70.39
   3   2   1 1766.22   69.89
   2  -3   1 1855.61   68.89
   3   1  -1  674.03   26.40
   1  -3  -1  674.53   26.60
  -1   3  -1  616.74   25.70
  -3  -1  -1  647.44   25.70
   1  -3  -1  668.73   25.80
   3   1   1  644.74   25.90
   1  -3   1  645.84   25.20
  -1   3   1  640.74   25.80
   1  -3   1  636.54   25.70
  -3  -1   1  637.34   26.30
   3   1   1  641.14   25.80
  -3   0  -1 1875.31   72.69
   0  -3  -1 1926.71   72.99
   3   0  -1 1903.41   72.99
   3   0  -1 1831.42   73.39
   0  -3  -1 1931.01   73.89
   3   0   1 1993.00   72.99
  -3   0   1 1872.71   73.39
   3   0   1 1828.22   72.79
   0   3   1 1907.21   73.09
  -2  -3  -1    2.00    2.10
  -2  -3  -1    1.60    1.40
   2   3  -1   -0.60    0.90
  -2  -3  -1    2.80    1.30
  -3   2  -1    1.20    0.90
   2   3  -1    1.10    1.20
   3  -2   1    1.40    0.80
  -2  -3   1    2.00    1.20
   2   3   1    1.20    1.20
   3  -2   1   -0.70    0.90
  -2  -3   1    0.60    0.80
   3   3  -1   36.60    3.70
   3   3  -1   46.80    2.60
   3  -3   1   38.20    2.30
  -3  -3   1   35.70    3.70
  -4  -3  -1   26.90    3.20
   3  -4  -1   30.60    3.20
   4   3  -1   25.30    3.50
   4   3   1   27.50    3.10
   4   3   1   29.30    3.20
   3  -4   1   28.40    2.80
   3  -4   1   26.00    1.80
  -4  -3   1   30.40    3.70
  -4  -2  -1  353.16   15.90
   2  -4  -1  365.86   16.30
   4   2  -1  388.26   15.20
  -2   4  -1  397.86   15.70
  -2   4  -1  363.86   14.70
   2  -4  -1  364.66   15.80
   4   2  -1  368.16   16.40
   4   2   1  360.46   15.70
   2  -4   1  370.36   14.50
  -2   4   1  371.16   15.80
  -4  -2   1  361.86   16.40
   2  -4   1  403.16   15.70
   4   2   1  355.06   15.90
   4   1  -1    4.10    1.80
   1  -4  -1    2.90    1.90
  -4  -1  -1    5.70    1.30
   1  -4  -1    5.10    1.40
  -1   4  -1    3.40    1.50
  -4  -1   1    3.70    1.60
   1  -4   1    0.40    1.60
   4   1   1    6.30    1.40
   4   1   1    6.40    1.50
  -1   4   1    9.30    1.80
  -4   0  -1  131.49    6.60
   0  -4  -1  142.89    7.80
   0  -4  -1  143.89    7.00
   0  -4   1  141.29    7.10
   4   0   1  133.19    6.70
   4   0   1  140.59    6.70
   0   4   1  136.89    7.10
  -1  -4  -1  418.36   18.20
  -1  -4  -1  400.56   17.10
   4  -1  -1  415.76   17.60
  -4   1  -1  415.66   16.70
   4  -1  -1  414.26   17.00
   4  -1   1  417.46   16.70
   1   4   1  388.06   17.30
  -4   1   1  402.76   17.40
   4  -1   1  409.06   16.90
  -1  -4   1  403.26   17.50
  -2  -4  -1  403.96   18.00
   2   4  -1  427.76   18.30
   2   4  -1  453.05   16.70
   4  -2  -1  428.86   18.30
  -2  -4  -1  417.26   18.20
  -2  -4  -1  436.76   19.10
   4  -2  -1  452.75   18.00
  -4   2  -1  424.06   17.40
   4  -2   1  429.26   17.20
  -2  -4   1  428.16   16.70
  -2  -4   1  402.86   18.30
  -4   2   1  431.66   18.10
   4  -2   1  411.16   17.50
   4  -3  -1  576.74   24.30
   3   4  -1  578.84   24.50
  -4   3  -1  620.64   23.70
  -3  -4  -1  553.14   25.40
  -3  -4  -1  603.04   24.50
   3   4   1  616.84   24.50
   4  -3   1  555.84   23.00
  -4   3   1  594.34   24.10
  -3  -4   1  564.84   24.70
   4  -3   1  573.24   23.60
  -4  -4  -1   17.00    2.90
  -4   4  -1   14.50    2.20
   4   4  -1   19.70    1.90
   4   4   1   16.70    2.40
   4   4   1   14.80    2.50
   4  -4   1   12.20    1.90
   4  -4   1   13.70    1.50
   4  -5  -1  107.49    6.40
   4  -5  -1  102.39    6.50
   5   4  -1  103.89    5.10
   5   4  -1  103.99    7.00
  -5  -4  -1  101.19    6.60
  -4   5  -1   97.09    5.90
   5   4   1  107.59    6.60
  -5  -4   1  103.49    6.90
   5   4   1  109.29    6.20
   4  -5   1   97.79    5.80
  -4   5   1  104.79    6.30
   4  -5   1  102.99    4.90
  -3   5  -1 1610.84   64.09
   3  -5  -1 1664.63   64.69
  -5  -3  -1 1648.14   64.79
   5   3  -1 1611.74   65.09
   5   3  -1 1679.13   63.39
   3  -5  -1 1657.33   64.29
   5   3   1 1596.54   64.69
  -5  -3   1 1652.83   65.19
   3  -5   1 1619.54   63.89
   5   3   1 1647.64   64.09
   3  -5   1 1665.63   62.89
  -3   5   1 1630.34   64.39
  -2   5  -1  109.49    6.50
  -5  -2  -1  119.89    6.70
  -2   5  -1  122.59    5.20
   5   2  -1  115.09    7.20
   5   2  -1  131.49    6.10
  -5  -2   1  126.89    7.30
   2  -5   1  117.89    6.60
   5   2   1  125.49    7.00
   5   2   1  124.79    6.60
  -2   5   1  131.29    6.80
   2  -5   1  119.99    5.20
   1  -5  -1 1113.59   42.50
  -1   5  -1  995.50   41.70
   1  -5  -1 1066.39   41.70
  -5  -1  -1 1022.30   41.60
   5   1  -1 1094.99   41.20
   5   1  -1 1061.59   42.40
   5   1   1 1071.89   41.50
  -5  -1   1 1024.50   42.30
   5   1   1 1025.00   41.80
  -1   5   1 1031.10   41.80
   1  -5   1 1028.60   41.60
  -5   0  -1  689.93   27.80
   5   0  -1  675.03   28.70
   5   0  -1  711.53   27.70
   0  -5   1  696.13   28.30
   5   0   1  719.23   27.70
  -5   0   1  682.53   28.50
   5   0   1  649.54   28.00
  -1  -5  -1 1133.29   45.10
   5  -1  -1 1143.29   44.80
  -1  -5  -1 1168.18   46.00
  -5   1  -1 1161.98   44.70
   5  -1  -1 1149.48   45.60
  -5   1   1 1146.19   45.50
   1   5   1 1109.59   45.40
  -1  -5   1 1104.59   45.30
   5  -1   1 1156.98   44.50
   5  -1   1 1100.19   44.90
   5  -2  -1    1.50    1.50
  -2  -5  -1    4.90    2.50
  -2  -5  -1    3.10    1.90
  -2  -5  -1    2.50    1.80
  -5   2  -1    2.90    1.30
   5  -2   1    3.20    1.20
   5  -2   1    2.30    1.20
   3   5  -1   55.49    4.80
   3   5  -1   57.89    3.10
   5  -3  -1   55.49    4.40
   5  -3  -1   53.19    4.60
   3   5   1   74.79    4.80
  -3  -5   1   65.69    5.20
   5  -3   1   65.29    3.50
  -5   3   1   53.29    4.40
   5  -4  -1  517.85   21.90
   4   5  -1  499.35   22.40
  -4  -5  -1  509.45   22.40
  -4  -5  -1  499.85   23.20
   5  -4  -1  523.55   22.20
   4   5  -1  536.15   20.50
  -5   4  -1  513.05   21.40
  -4  -5   1  525.75   22.80
   5  -4   1  529.45   20.60
   4   5   1  514.05   22.30
   5  -4   1  490.15   21.40
  -5   4   1  513.45   21.90
  -5  -5  -1    0.20    1.80
  -5   5  -1    1.50    1.30
   5  -5  -1    0.50    1.80
   5   5  -1    4.50    2.10
   5  -5  -1   -0.30    1.40
   5   5  -1   -1.30    0.90
   5  -5   1    1.10    1.30
  -5   5   1   -1.10    1.20
   5   5   1   -0.70    1.30
   5   5   1    0.30    1.50
  -5  -5   1    0.00    1.70
   5  -5   1   -1.10    0.90
  -6  -5  -1   99.29    7.30
   6   5  -1  108.19    7.70
  -5   6  -1  109.99    6.80
   6   5  -1  120.19    5.80
   5  -6  -1  131.59    7.50
   5  -6  -1  107.19    7.10
   5  -6   1  120.99    5.70
   6   5   1  108.79    6.60
  -5   6   1  108.69    7.10
   6   5   1  102.09    7.20
  -6  -5   1  111.39    7.90
   5  -6   1  103.19    6.60
   6   4  -1  412.56   15.70
  -6  -4  -1  361.36   17.30
   6   4  -1  382.56   17.90
   4  -6  -1  378.46   17.10
  -4   6  -1  370.46   16.60
   4  -6  -1  369.76   16.80
   6   4   1  353.56   16.40
   4  -6   1  376.26   15.30
   6   4   1  370.46   17.40
   4  -6   1  369.86   16.40
  -6  -4   1  375.86   17.80
  -4   6   1  368.46   16.90
   3  -6  -1    2.00    1.60
  -3   6  -1    4.60    1.70
   6   3  -1    1.80    1.30
   6   3  -1    2.90    1.90
  -6  -3  -1    1.60    1.50
   3  -6  -1    1.10    2.20
  -3   6   1    1.90    1.60
   3  -6   1    3.10    1.60
   6   3   1    3.20    1.60
   6   3   1    3.50    1.90
   3  -6   1    3.90    1.10
  -6  -3   1    2.00    1.90
   2  -6  -1   19.60    3.20
   6   2  -1   25.20    3.60
   2  -6  -1   31.50    3.40
  -2   6  -1   29.50    3.50
   6   2  -1   23.70    2.60
   6   2   1   20.80    2.90
   6   2   1   23.10    3.30
   1  -6  -1   18.30    3.20
  -1   6  -1   18.20    2.80
   6   1  -1   21.30    2.60
   6   1  -1   21.40    3.30
   1  -6  -1   20.10    2.80
  -6  -1  -1   20.90    2.80
   6   1   1   20.90    2.60
   6   1   1   21.30    3.10
   1  -6   1   17.60    2.90
  -1   6   1   26.90    3.40
  -6  -1   1   17.20    2.90
   6   0  -1   84.09    6.20
  -6   0  -1   82.89    5.30
   6   0  -1   84.69    5.20
   6   0   1  105.59    6.00
   6   0   1   92.49    5.20
  -6   0   1   78.69    5.70
  -1  -6  -1  177.38    9.30
   6  -1  -1  179.68    8.70
  -1  -6  -1  174.68   10.00
   6  -1  -1  171.68    9.60
  -6   1  -1  171.68    8.70
   6  -1   1  190.08    9.30
  -1  -6   1  162.68    9.40
  -6   1   1  176.08    9.40
   1   6   1  167.38    9.50
  -1  -6   1  214.18    9.80
   6  -1   1  195.58    8.60
  -2  -6  -1   -1.00    2.00
  -2  -6  -1    0.70    1.70
  -6   2  -1   -0.70    1.00
  -2  -6  -1   -0.10    1.60
   6  -2  -1   -0.60    1.30
   6  -2  -1   -0.30    1.20
  -6   2   1   -1.20    1.10
   6  -2   1    0.20    0.90
  -2  -6   1    1.30    2.20
   6  -2   1   -0.60    1.10
  -3  -6  -1   95.79    7.30
  -3  -6  -1   88.19    6.20
  -6   3  -1   96.89    5.50
  -3  -6  -1   89.29    6.70
   6  -3  -1   91.49    6.40
   3   6  -1   85.19    6.20
   6  -3  -1   94.49    5.80
   3   6  -1   92.99    4.30
   6  -3   1   90.49    5.70
  -3  -6   1   88.79    6.70
   6  -3   1   98.39    4.90
  -6   3   1   95.09    6.10
  -4  -6  -1   95.99    6.50
   4   6  -1   81.19    4.10
   4   6  -1   77.79    6.10
  -4  -6  -1   92.39    7.70
  -4  -6  -1   92.19    6.40
   6  -4  -1   65.39    5.60
  -6   4  -1   72.29    5.00
   4   6   1   89.49    6.00
   6  -4   1   75.69    4.30
  -6   4   1   69.89    5.40
   6  -4   1   68.99    5.20
  -4  -6   1   78.19    6.30
   5   6  -1  340.77   16.80
   5   6  -1  378.66   14.60
   6  -5  -1  349.47   16.10
  -5  -6  -1  369.96   17.10
  -6   5  -1  337.67   15.60
   6  -5  -1  347.17   16.40
  -5  -6   1  359.56   17.30
   5   6   1  331.37   15.60
   5   6   1  342.77   16.60
  -6   5   1  355.86   16.20
   6  -5   1  352.66   14.60
   6  -5   1  336.57   15.70
  -6   6  -1   91.39    6.40
   6  -6  -1   95.69    7.00
   6   6  -1  105.89    5.40
   6   6  -1   99.29    7.40
  -6   6   1  105.19    6.90
   6   6   1   99.49    6.40
  -6  -6   1   97.79    8.00
   6  -6   1   98.79    5.50
   6   6   1  109.79    7.30
   6  -6   1   99.39    6.60
   6  -7  -1  217.88   11.60
   6  -7  -1  217.18   11.70
   7   6  -1  211.58    9.90
  -6   7  -1  209.78   11.20
  -7  -6  -1  216.08   12.30
   7   6  -1  219.58   12.50
   6  -7   1  205.98   11.00
  -6   7   1  222.78   11.60
   7   6   1  203.38   10.90
  -7  -6   1  220.28   12.70
   7   6   1  210.38   12.00
   6  -7   1  221.58   10.10
   7   5  -1   10.10    2.00
   5  -7  -1    7.00    3.10
  -7  -5  -1    9.40    2.80
   7   5  -1   14.60    3.40
   5  -7  -1    4.60    2.30
  -5   7  -1    9.20    2.60
   7   5   1    7.60    2.40
   7   5   1    8.30    2.60
  -5   7   1    5.60    2.40
   5  -7   1   10.00    2.00
   5  -7   1    7.80    2.40
  -7  -5   1    7.80    2.90
   7   4  -1  322.47   13.60
   4  -7  -1  311.37   14.90
   4  -7  -1  353.16   15.60
  -4   7  -1  285.27   14.60
  -7  -4  -1  308.17   15.30
   7   4  -1  317.77   16.00
   7   4   1  322.27   15.60
   7   4   1  321.47   14.50
  -4   7   1  294.17   14.80
  -7  -4   1  305.97   15.80
   4  -7   1  326.27   13.40
   4  -7   1  306.77   14.60
  -7  -3  -1   16.60    3.00
   3  -7  -1   17.90    3.10
   7   3  -1   14.90    3.00
  -3   7  -1   15.20    2.90
   3  -7  -1   14.10    3.20
   7   3  -1   19.50    2.50
   7   3   1   14.80    2.90
  -7  -3   1   14.30    3.20
   3  -7   1   15.50    2.00
   7   3   1   16.30    2.60
   3  -7   1   18.10    3.00
  -3   7   1   14.90    2.90
   2  -7  -1 1696.73   65.39
  -2   7  -1 1619.74   64.89
   7   2  -1 1614.14   65.69
   2  -7  -1 1640.64   64.69
   7   2  -1 1690.53   63.79
  -7  -2  -1 1601.64   64.99
  -7  -2   1 1613.64   65.59
   2  -7   1 1644.44   64.59
   7   2   1 1672.33   64.29
   7   2   1 1600.14   65.09
  -2   7   1 1619.94   64.89
   7   1  -1    2.30    1.40
  -7  -1  -1   -1.30    1.40
   1  -7  -1    0.90    1.60
   7   1  -1    8.20    2.30
  -1   7  -1   -0.50    1.50
   1  -7  -1   -3.60    2.00
   1  -7   1   -1.10    1.80
  -7  -1   1    6.20    1.90
  -1   7   1    5.60    2.00
   7   1   1   -0.90    1.20
   7   1   1   -1.30    1.40
   7   0  -1   11.80    2.90
  -7   0  -1   14.40    2.50
   0  -7  -1   13.20    3.50
   7   0  -1   12.20    2.10
  -7   0   1   14.20    3.00
   7   0   1   12.80    2.10
   7   0   1   12.40    2.60
  -7   1  -1  171.98    8.70
  -1  -7  -1  163.88    9.00
   7  -1  -1  175.38    9.60
   7  -1  -1  168.28    8.40
  -1  -7  -1  163.48    9.80
   7  -1   1  163.38    8.90
  -1  -7   1  157.48    9.30
   7  -1   1  167.58    8.00
   1   7   1  163.18    9.50
  -7   1   1  169.98    9.30
  -1  -7   1  148.59    9.20
   7  -2  -1    1.60    1.80
   7  -2  -1    3.10    1.70
  -7   2  -1   -0.50    1.40
   7  -2   1    2.90    1.40
  -7   2   1    1.80    1.80
   7  -3  -1  147.29    9.20
  -3  -7  -1  148.69    9.10
  -3  -7  -1  162.08    9.70
  -3  -7  -1  153.68   10.10
   3   7  -1  159.18    6.80
   7  -3  -1  153.98    8.40
  -7   3  -1  168.48    8.30
  -3  -7   1  146.29    9.60
   7  -3   1  162.48    7.60
  -7   3   1  163.88    8.90
   7  -3   1  152.28    8.60
   7  -4  -1  258.57   13.60
   4   7  -1  254.47   13.70
  -4  -7  -1  301.87   13.90
  -4  -7  -1  295.17   14.30
   4   7  -1  266.37   11.20
  -7   4  -1  259.87   12.60
   7  -4  -1  281.07   13.10
  -4  -7   1  248.78   13.90
   7  -4   1  255.47   12.90
  -7   4   1  265.67   13.20
   7  -4   1  268.67   11.70
  -7   5  -1 1298.37   51.29
   7  -5  -1 1314.97   51.69
   5   7  -1 1267.17   49.80
   5   7  -1 1298.87   52.79
  -5  -7  -1 1279.47   52.69
   7  -5  -1 1319.37   52.39
   7  -5   1 1266.87   51.49
  -5  -7   1 1267.07   52.99
   5   7   1 1254.67   52.29
   7  -5   1 1286.77   50.09
   5   7   1 1224.98   51.09
  -7   5   1 1310.57   51.79
  -7   6  -1    5.60    2.00
   7  -6  -1    3.20    2.10
   7  -6  -1    3.30    2.50
  -6  -7  -1    3.10    2.90
   6   7  -1    4.80    2.30
   7  -6   1    0.40    1.90
  -6  -7   1    7.10    2.70
   6   7   1    1.50    2.40
   7  -6   1    3.50    1.70
   6   7   1    0.70    2.10
  -7   7  -1   97.39    6.90
   7  -7  -1   89.59    7.60
   7   7  -1   92.19    7.90
  -7  -7  -1   93.69    7.80
   7   7  -1  100.79    5.50
   7  -7  -1   95.39    7.40
   7   7   1   92.59    6.70
  -7  -7   1   91.39    8.40
   7  -7   1   93.89    5.90
  -7   7   1   92.59    7.20
   7   7   1   92.69    7.40
   7  -7   1   86.39    6.80
   8   7  -1   80.79    7.70
  -7   8  -1   79.39    6.70
  -8  -7  -1   78.99    7.50
   7  -8  -1   79.29    7.10
   7  -8  -1  104.29    7.90
   8   7  -1   85.79    5.40
   8   7   1   70.99    7.00
   7  -8   1   76.19    6.60
   7  -8   1   77.89    5.80
  -7   8   1   80.89    7.00
   8   7   1   79.79    6.40
  -8  -7   1   82.09    8.00
   8   6  -1   21.90    2.90
  -6   8  -1   20.40    3.70
  -8  -6  -1   24.00    4.50
   8   6  -1   23.90    4.60
   6  -8  -1   21.40    3.90
  -6   8   1   21.40    3.80
   8   6   1   22.00    4.20
   6  -8   1   19.10    3.00
   6  -8   1   22.70    3.60
   8   6   1   18.90    3.50
  -8  -6   1   21.00    4.60
   8   5  -1   61.99    6.50
  -5   8  -1   64.89    5.80
  -8  -5  -1   67.79    6.40
   5  -8  -1   54.69    5.60
   8   5  -1   62.79    4.60
   5  -8  -1   59.79    6.40
   8   5   1   75.99    5.50
   8   5   1   76.99    6.60
  -5   8   1   53.79    5.70
   5  -8   1   59.59    4.80
  -8  -5   1   84.19    7.20
   5  -8   1   64.89    5.60
   8   4  -1  130.29    6.70
  -4   8  -1  114.89    7.80
   4  -8  -1  111.19    7.70
   4  -8  -1  111.69    8.30
  -8  -4  -1  136.19    8.50
   8   4  -1  129.79    8.80
  -8  -4   1  111.99    8.40
   8   4   1  127.19    7.30
   4  -8   1  113.59    7.50
   8   4   1  116.19    8.30
  -4   8   1  116.79    7.90
   4  -8   1  115.39    6.40
   8   3  -1   14.70    2.50
   8   3  -1   15.20    3.40
  -8  -3  -1   11.30    2.90
   3  -8  -1   10.20    2.70
   3  -8  -1   11.10    3.40
   8   3   1   13.80    2.70
   8   3   1   10.40    2.80
  -3   8   1   11.60    2.90
  -8  -2  -1    1.70    1.70
  -2   8  -1    4.10    2.20
   8   2  -1    1.00    2.00
   2  -8  -1    1.30    1.80
   2  -8  -1   -1.00    2.50
   8   2   1   -0.50    1.70
   8   2   1    2.30    1.90
  -8  -2   1    2.00    2.00
   2  -8   1   -2.20    1.50
   2  -8   1    5.10    2.20
  -2   8   1    1.60    2.00
  -8  -1  -1   21.90    3.40
   8   1  -1   22.30    2.90
   1  -8  -1   34.70    4.30
   1  -8  -1   18.80    3.80
   8   1  -1   24.70    4.10
  -8  -1   1   26.50    4.20
  -1   8   1   22.60    3.60
   8   1   1   19.20    2.80
   1  -8   1   24.40    3.80
   8   1   1   24.50    3.80
   8   0  -1  237.28   10.90
   8   0  -1  223.08   12.40
   0  -8  -1  241.08   11.80
   0  -8  -1  223.88   12.40
  -8   0  -1  214.68   11.30
   8   0   1  209.38   11.60
   8   0   1  222.08   10.60
   0   8   1  239.28   12.40
  -8   0   1  226.88   12.00
   0  -8   1  207.68   11.60
   8  -1  -1  129.69    8.70
  -1  -8  -1  122.19    9.00
  -1  -8  -1  131.59    8.30
  -8   1  -1  140.99    7.90
   8  -1  -1  128.09    7.50
  -8   1   1  131.39    8.30
   8  -1   1  136.99    8.20
  -1  -8   1  128.19    8.70
  -1  -8   1  143.79    8.90
   8  -1   1  146.19    7.10
   1   8   1  122.59    8.70
  -2  -8  -1    3.10    3.00
   8  -2  -1    1.90    1.70
  -2  -8  -1    4.60    2.30
  -8   2  -1    1.70    1.70
  -2  -8  -1    4.70    2.40
   8  -2  -1    1.80    2.20
   8  -2   1    3.20    1.40
   8  -2   1    3.80    2.10
  -8   2   1    1.60    1.80
  -2  -8   1    7.10    2.90
  -2  -8   1    2.30    2.40
  -8   3  -1   27.20    3.70
  -3  -8  -1   33.60    5.30
   8  -3  -1   24.80    4.30
  -3  -8  -1   46.70    5.60
   8  -3  -1   28.60    4.00
   3   8  -1   31.50    2.40
  -3  -8  -1   39.50    5.60
   8  -3   1   29.50    3.10
   8  -3   1   35.70    4.50
  -8   3   1   31.60    4.20
  -3  -8   1   35.00    5.40
   8  -4  -1  104.99    7.80
  -8   4  -1  107.49    6.90
   8  -4  -1  116.89    7.40
   8  -4   1  117.09    7.50
  -8   4   1  116.59    7.60
   8  -4   1  110.29    6.10
  -5  -8  -1   31.70    4.90
  -5  -8  -1   26.90    4.80
   8  -5  -1   41.60    5.00
   5   8  -1   38.50    5.40
   8  -5  -1   33.30    4.80
  -8   5  -1   34.10    4.10
   5   8  -1   38.60    3.00
   8  -5   1   38.30    3.50
   8  -5   1   37.40    4.80
  -5  -8   1   30.60    4.90
  -8   5   1   29.90    4.40
   5   8   1   33.00    4.40
  -8   6  -1    6.00    2.40
   6   8  -1   16.90    2.50
   6   8  -1    7.20    3.10
   8  -6  -1   11.30    3.40
   8  -6  -1    6.90    3.00
  -8   6   1    9.00    2.80
   8  -6   1    5.00    2.20
   8  -6   1    6.40    2.80
  -6  -8   1    6.50    3.50
  -8   7  -1  289.77   14.90
   8  -7  -1  288.77   15.30
   8  -7  -1  314.07   16.00
  -7  -8  -1  297.87   16.50
   7   8  -1  290.77   16.10
   7   8  -1  319.77   13.40
   7   8   1  290.57   16.00
  -7  -8   1  307.27   16.90
  -8   7   1  309.57   15.40
   7   8   1  300.57   14.60
   8  -7   1  297.07   15.10
   8  -7   1  315.77   13.90
  -8   8  -1   -0.10    2.60
   8   8  -1    7.30    2.30
   8   8  -1    3.60    3.20
  -8  -8  -1    2.50    3.40
   8  -8  -1    8.90    3.40
   8  -8   1    0.50    2.70
   8   8   1    5.60    3.20
   8   8   1    8.90    3.20
  -8  -8   1    4.60    4.00
  -9  -8  -1   29.40    5.20
   9   8  -1   37.10    4.10
  -8   9  -1   25.80    4.50
   9   8  -1   30.90    5.90
   8  -9  -1   27.80    4.90
   8  -9  -1   27.10    5.50
   9   8   1   24.00    4.70
   9   8   1   29.10    4.80
   8  -9   1   27.00    4.20
  -8   9   1   31.60    5.10
   8  -9   1   27.10    4.50
  -9  -8   1   31.70    5.80
   7  -9  -1 1653.73   65.59
   9   7  -1 1618.34   66.79
  -9  -7  -1 1634.84   66.59
   7  -9  -1 1619.34   65.49
   9   7  -1 1631.34   63.29
  -7   9  -1 1558.34   65.09
   9   7   1 1601.44   64.29
   7  -9   1 1585.44   64.79
   7  -9   1 1646.84   63.69
   9   7   1 1540.65   66.09
  -7   9   1 1597.54   65.39
  -9  -7   1 1627.34   66.99
   9   6  -1    1.60    2.10
  -6   9  -1    7.60    2.80
   6  -9  -1    6.00    2.80
   9   6  -1    4.10    3.20
  -9  -6  -1    4.50    3.00
   6  -9   1    6.20    2.70
   6  -9   1    0.90    2.50
  -9  -6   1    3.20    3.10
   9   6   1   -0.40    2.40
  -6   9   1    7.40    2.90
   9   6   1    2.70    2.90
   5  -9  -1   28.60    4.40
   9   5  -1   26.70    5.00
  -5   9  -1   27.90    4.40
   9   5  -1   27.20    3.60
  -9  -5  -1   34.10    5.10
   5  -9  -1   31.30    5.00
  -5   9   1   28.20    4.60
   9   5   1   31.80    4.20
   9   5   1   26.60    4.60
   5  -9   1   29.60    4.20
  -9  -5   1   28.90    5.00
   5  -9   1   28.70    3.60
   9   4  -1  172.08   11.30
  -9  -4  -1  189.78   11.00
   9   4  -1  171.68    8.80
  -4   9  -1  168.18   10.50
   9   4   1  174.68    9.60
   4  -9   1  174.78    8.80
   9   4   1  176.08   11.00
  -9  -4   1  161.38   11.10
   4  -9   1  162.68    9.90
   3  -9  -1 1834.72   72.79
  -3   9  -1 1785.02   73.09
   9   3  -1 1837.62   74.19
   3  -9  -1 1898.71   73.39
   9   3  -1 1826.42   71.39
  -9  -3  -1 1805.32   73.29
  -3   9   1 1816.02   73.09
   9   3   1 1833.82   71.89
   3  -9   1 1819.42   72.49
  -9  -3   1 1847.72   74.09
   3  -9   1 1813.62   70.89
   9   3   1 1816.22   73.59
   2  -9  -1  367.16   17.70
   2  -9  -1  388.86   18.50
   9   2  -1  393.16   16.80
  -9  -2  -1  395.06   18.20
   9   2  -1  385.56   19.10
  -2   9  -1  370.16   18.20
   2  -9   1  368.76   15.90
   2  -9   1  380.36   18.00
  -9  -2   1  384.96   18.80
  -2   9   1  360.46   18.10
   9   2   1  371.26   18.30
   9   2   1  387.46   17.00
   9   1  -1  719.13   32.00
  -9  -1  -1  732.13   31.10
   1  -9  -1  721.23   30.90
   1  -9  -1  722.23   31.60
   9   1  -1  726.53   29.90
  -9  -1   1  722.63   31.70
   9   1   1  720.63   31.40
   9   1   1  714.53   29.90
   1  -9   1  753.92   31.10
  -1   9   1  729.53   31.60
   9   0  -1   27.60    3.60
   9   0  -1   27.90    4.80
  -9   0  -1   25.70    3.70
   9   0   1   22.90    3.10
   9   0   1   24.40    3.90
   0  -9   1   24.30    4.30
  -9   0   1   22.10    4.00
   9  -1  -1  109.79    8.40
  -1  -9  -1  132.09    8.40
  -9   1  -1  107.29    7.30
  -1  -9  -1  118.89    9.20
   9  -1  -1  100.59    6.80
   9  -1   1  104.39    6.40
  -1  -9   1  135.99    9.00
  -9   1   1  110.59    8.00
   9  -1   1  112.29    7.90
   1   9   1  135.49    9.10
   9  -2  -1  398.66   18.40
  -9   2  -1  410.76   18.70
   9  -2  -1  403.76   19.90
  -9   2   1  442.46   19.80
  -2  -9   1  459.45   20.20
  -2  -9   1  410.86   20.20
   9  -2   1  380.86   19.20
   9  -2   1  407.26   17.70
  -9   3  -1    6.50    2.30
   9  -3  -1    1.90    2.40
   9  -3  -1    6.40    3.00
  -3  -9   1   10.40    4.70
  -9   3   1    4.50    2.30
  -3  -9   1    6.60    3.70
   9  -3   1    7.10    2.10
   9  -3   1    6.30    2.90
   9  -4  -1  171.48   10.10
   9  -4  -1  181.28   11.20
  -9   4  -1  180.08    9.90
  -4  -9  -1  229.78   13.30
   4   9  -1  173.78    8.10
  -4  -9   1  157.38   12.10
   9  -4   1  192.98    9.00
   9  -4   1  174.68   10.40
  -9   4   1  177.28   10.50
  -5  -9  -1   76.79    8.10
  -5  -9  -1   75.79    7.80
  -9   5  -1   78.19    6.20
   9  -5  -1   76.69    6.90
   9  -5  -1   83.39    7.40
  -9   5   1   81.49    6.70
  -5  -9   1   98.79    8.30
   9  -5   1   83.09    6.80
   9  -5   1   77.39    5.40
   5   9   1   91.39    6.50
   9  -6  -1   35.10    5.10
   6   9  -1   48.50    3.80
  -6  -9  -1   36.90    6.00
  -6  -9  -1   27.40    5.50
  -9   6  -1   35.80    4.80
   9  -6  -1   33.60    5.20
   6   9  -1   28.80    5.00
  -9   6   1   37.60    5.20
   9  -6   1   37.60    5.20
   9  -6   1   46.20    4.50
   6   9   1   39.40    5.10
  -9   7  -1    6.80    2.90
   7   9  -1    8.80    2.10
   9  -7  -1    3.00    3.70
   9  -7  -1    2.20    3.40
   7   9  -1    6.10    3.90
   9  -7   1   12.20    2.80
   9  -7   1   -1.00    2.90
   7   9   1    6.90    2.90
  -7  -9   1    7.40    3.80
  -9   7   1    1.20    3.00
  -9   8  -1   81.39    7.00
   9  -8  -1   85.79    8.10
   8   9  -1   68.79    5.30
   9  -8  -1   66.79    8.00
  -8  -9  -1   86.29    9.30
   8   9  -1   70.49    8.30
   9  -8   1   84.29    7.50
  -9   8   1   76.09    7.30
  -8  -9   1   81.29    9.60
   9  -8   1   93.39    6.70
   8   9   1   95.89    8.80
   8   9   1   73.99    7.00
   9   9  -1  458.55   19.20
   9  -9  -1  432.56   21.90
   9   9  -1  426.76   22.50
  -9   9  -1  445.26   21.70
   9  -9  -1  453.45   21.90
  -9  -9  -1  433.66   22.70
   9  -9   1  460.75   20.10
   9   9   1  436.66   20.50
  -9   9   1  433.36   21.50
   9   9   1  437.56   22.50
  -9  -9   1  417.76   23.00
   9  -9   1  446.76   21.40
  10   9  -1   40.50    6.60
   9 -10  -1   52.89    7.10
  10   9  -1   52.39    5.30
   9 -10  -1   43.10    7.10
  -9  10   1   44.10    6.60
   9 -10   1   39.60    5.60
  10   9   1   52.49    6.60
 -10  -9   1   61.59    8.60
 -10  -8  -1   24.10    5.20
  10   8  -1   15.00    3.10
  -8  10  -1   17.80    4.90
   8 -10  -1   22.60    4.50
   8 -10  -1   21.50    5.20
  10   8  -1   18.70    5.00
  -8  10   1   27.20    5.10
  10   8   1   23.80    4.10
 -10  -8   1   23.90    5.60
   8 -10   1   17.90    3.80
  10   8   1   19.10    4.70
   8 -10   1   18.80    4.30
  10   7  -1   24.70    3.50
   7 -10  -1   25.10    5.00
 -10  -7  -1   21.30    4.80
  10   7  -1   25.70    5.40
  -7  10  -1   22.00    4.40
   7 -10  -1   23.40    5.10
  -7  10   1   29.80    5.30
 -10  -7   1   26.50    5.50
   7 -10   1   27.60    4.10
  10   7   1   25.00    5.00
   7 -10   1   23.40    4.40
  10   6  -1   26.70    5.50
   6 -10  -1   32.10    5.40
 -10  -6  -1   18.10    4.40
  -6  10  -1   21.60    4.20
   6 -10   1   17.00    3.70
   6 -10   1   20.00    3.90
 -10  -6   1   20.60    4.90
  -6  10   1   19.60    4.20
  10   6   1   22.90    3.90
  10   6   1   24.90    4.90
   5 -10  -1  397.16   20.70
   5 -10  -1  410.66   20.00
 -10  -5  -1  433.46   21.00
  10   5  -1  413.16   18.30
  10   5  -1  425.16   21.70
  -5  10  -1  418.66   20.30
  10   5   1  402.06   20.90
  10   5   1  441.86   19.20
  -5  10   1  405.86   20.30
   5 -10   1  416.06   19.60
 -10  -5   1  416.66   21.50
   5 -10   1  409.06   18.50
   4 -10  -1    8.50    3.30
  10   4  -1   11.50    3.70
  10   4  -1   13.10    2.70
 -10  -4  -1   10.50    3.50
   4 -10  -1    7.40    4.00
  -4  10  -1   12.50    3.70
 -10  -4   1   10.50    4.00
   4 -10   1    7.30    3.00
  10   4   1    8.20    3.40
  10   4   1    9.50    2.80
  -4  10   1    8.40    3.50
  10   3  -1   28.10    5.10
  -3  10  -1   38.00    5.40
   3 -10  -1   28.30    5.20
  10   3  -1   35.50    4.10
   3 -10  -1   32.70    4.60
 -10  -3  -1   35.00    5.10
  -3  10   1   37.10    5.70
   3 -10   1   28.70    3.80
  10   3   1   35.70    5.30
   3 -10   1   39.50    5.30
  10   3   1   30.10    4.00
 -10  -3   1   32.00    5.20
  10   2  -1   -0.10    2.60
  10   2  -1   -3.20    2.00
   2 -10  -1    0.80    2.20
  -2  10  -1    2.00    2.30
   2 -10  -1    2.70    3.20
 -10  -2  -1    0.50    2.00
 -10  -2   1    0.20    2.30
  10   2   1    0.40    1.90
  10   2   1   -0.70    2.20
   2 -10   1   -0.60    2.50
  -2  10   1    1.30    2.70
   1 -10  -1  295.77   15.10
  10   1  -1  288.07   13.90
   1 -10  -1  300.17   15.90
 -10  -1  -1  295.47   15.10
  10   1  -1  303.87   16.30
  10   1   1  292.27   15.60
 -10  -1   1  305.77   15.90
  10   1   1  281.17   13.80
   1 -10   1  313.07   15.40
  -1  10   1  301.77   15.90
 -10   0  -1   -0.60    1.90
  10   0  -1   -0.80    2.00
  10   0  -1    7.20    2.90
  10   0   1   -1.20    2.30
  10   0   1    1.10    1.80
 -10   0   1   -0.60    2.10
   0 -10   1   -1.40    2.50
  -1 -10  -1  159.28   10.30
  -1 -10  -1  173.18   11.10
 -10   1  -1  166.08    9.70
  10  -1  -1  160.78    9.20
  -1 -10  -1  148.79   11.10
  10  -1  -1  169.78   11.00
  -1 -10   1  159.88   10.80
  -1 -10   1  157.68   11.00
 -10   1   1  164.58   10.40
  10  -1   1  156.68   10.20
  10  -1   1  163.88    8.50
  10  -2  -1   23.60    4.70
 -10   2  -1   20.80    3.50
  -2 -10  -1   25.30    5.00
  10  -2  -1   23.30    3.70
  -2 -10  -1   21.40    5.30
 -10   2   1   20.20    3.90
  10  -2   1   23.60    4.20
  10  -2   1   23.00    3.10
  -2 -10   1   20.90    4.70
  -2 -10   1   21.50    5.20
  10  -3  -1   27.90    4.20
  -3 -10  -1   45.00    6.10
  10  -3  -1   38.40    6.50
  -3 -10  -1   35.60    6.00
  -3 -10  -1   31.90    6.70
 -10   3  -1   36.70    4.60
  10  -3   1   36.50    5.30
 -10   3   1   36.40    5.10
  10  -3   1   30.50    3.90
  -4 -10  -1   64.09    8.40
  10  -4  -1   72.69    7.70
 -10   4  -1   61.19    5.90
  10  -4  -1   77.39    6.50
   4  10  -1   76.29    4.40
  -4 -10  -1   66.59    9.90
  -4 -10  -1   78.99    9.30
  -4 -10   1   78.19    9.20
  10  -4   1   75.49    7.10
  10  -4   1   74.39    5.30
 -10   4   1   68.79    6.70
  -4 -10   1   80.69    8.40
   5  10  -1  155.58    7.50
  -5 -10   1  142.09   11.40
  10  -6  -1   18.70    4.60
 -10   6  -1   19.40    3.80
  -6 -10  -1   16.40    5.10
   6  10   1   18.10    3.90
  10  -6   1   16.90    3.20
  10  -6   1   14.40    3.90
  -6 -10   1   23.20    4.90
  10  -7  -1   14.80    4.20
  -7 -10  -1   19.90    5.50
   7  10  -1   19.90    4.80
 -10   7  -1   20.60    4.00
  10  -7  -1   21.40    4.40
  10  -7   1   24.40    3.60
 -10   7   1   19.80    4.40
   7  10   1   20.50    4.00
  -7 -10   1   14.80    4.70
  10  -7   1   14.10    3.90
  -8 -10  -1    0.30    3.80
  10  -8  -1    6.70    3.10
   8  10  -1    1.00    3.20
 -10   8  -1   -2.40    3.00
   8  10  -1    1.90    2.20
 -10   8   1    5.50    2.90
  10  -8   1   -1.70    2.50
  10  -8   1   -1.70    3.00
  -8 -10   1    6.60    4.10
   8  10   1    7.20    3.30
   8  10   1   11.80    3.50
  10  -9  -1   12.20    4.40
  10  -9  -1   12.10    4.10
   9  10  -1   15.00    2.80
  -9 -10  -1   17.60    7.70
  10  -9   1   18.20    3.60
   9  10   1   12.90    6.50
  -9 -10   1   16.80    5.40
   9  10   1   10.50    3.90
 -10   9   1   15.00    4.10
  10  10  -1    4.90    2.40
  10 -10  -1    7.00    4.10
 -10 -10   1    1.60    3.70
  10  10   1   10.80    3.40
 -10  10   1   15.30    3.80
  10 -10   1    6.30    3.10
  11  10  -1   56.19    5.40
  10 -11  -1   56.99    8.00
 -11 -10   1   63.19    9.10
  11  10   1   64.49    6.80
  10 -11   1   53.09    6.80
  11   9  -1  122.09    7.60
   9 -11  -1  117.99   12.40
   9 -11  -1  112.09   10.40
 -11  -9   1  121.49   11.00
   9 -11   1  118.39    8.80
  11   9   1  117.79    8.60
  -9  11   1  114.29    9.70
   8 -11  -1  128.79    9.80
   8 -11  -1  127.49   10.80
  11   8  -1  121.69   10.70
  11   8  -1  126.79    7.90
   8 -11   1  136.69    8.90
  -8  11   1  123.79    9.90
  11   8   1  123.09    8.80
 -11  -8   1  110.59   10.70
  11   7  -1  277.17   16.90
   7 -11  -1  271.17   16.20
   7 -11  -1  273.07   15.60
  11   7  -1  272.57   13.50
 -11  -7  -1  285.77   18.00
   7 -11   1  272.67   15.40
   7 -11   1  307.07   14.70
  -7  11   1  265.87   15.60
  11   7   1  279.67   14.40
 -11  -7   1  274.07   16.80
  11   7   1  269.27   16.30
   6 -11  -1   11.40    4.40
 -11  -6  -1    9.20    3.90
  -6  11  -1   14.60    4.00
   6 -11  -1   13.40    3.80
  11   6  -1   17.90    4.80
  11   6  -1   16.40    3.20
   6 -11   1    8.90    3.50
 -11  -6   1   19.60    5.20
   6 -11   1   17.20    4.00
  11   6   1   16.00    3.60
  11   6   1   15.80    4.70
  -6  11   1   19.30    4.70
  -5  11  -1   -1.60    3.00
  11   5  -1   -2.20    3.20
 -11  -5  -1   -0.40    2.90
   5 -11  -1   -0.20    2.70
  11   5  -1   -1.90    2.10
   5 -11  -1    0.10    3.70
   5 -11   1   -1.90    2.50
   5 -11   1   -0.20    2.60
  11   5   1    2.90    2.30
 -11  -5   1   -2.00    3.00
  11   5   1    3.70    3.30
  -5  11   1   -0.20    2.70
  11   4  -1   43.00    6.70
  11   4  -1   50.39    4.90
   4 -11  -1   48.10    6.30
 -11  -4  -1   40.90    6.10
   4 -11  -1   48.30    6.80
  -4  11  -1   60.79    7.30
   4 -11   1   55.89    5.30
 -11  -4   1   44.70    7.40
   4 -11   1   43.50    6.10
  11   4   1   45.60    5.20
  11   4   1   38.40    6.00
  -4  11   1   54.39    6.90
 -11  -3  -1 1461.95   61.19
  -3  11  -1 1474.45   61.29
   3 -11  -1 1516.95   61.29
  11   3  -1 1502.35   62.39
  11   3  -1 1527.45   59.29
   3 -11  -1 1517.25   60.79
  11   3   1 1528.35   59.49
 -11  -3   1 1459.15   61.89
  -3  11   1 1466.65   61.39
   3 -11   1 1479.85   58.59
  11   3   1 1483.35   61.79
   3 -11   1 1436.26   60.39
 -11  -2  -1   18.70    4.10
  -2  11  -1   17.80    4.00
  11   2  -1   11.60    4.30
   2 -11  -1    9.50    3.60
   2 -11   1   18.00    3.10
 -11  -2   1    6.50    3.90
  -2  11   1    9.70    4.10
  11   2   1   15.40    4.10
   2 -11   1   11.80    4.40
  11   1  -1  899.21   39.40
   1 -11  -1  870.21   38.50
  11   1  -1  869.91   36.70
 -11  -1  -1  882.61   38.10
   1 -11  -1  861.01   37.80
  -1  11   1  914.31   39.10
  11   1   1  842.02   38.50
 -11  -1   1  912.21   39.00
  11   1   1  902.41   36.50
   1 -11   1  943.51   38.30
  11   0  -1  112.49    7.80
   0 -11  -1  118.69   10.40
  11   0  -1  126.59   10.00
 -11   0  -1  115.09    8.50
  11   0   1  135.39    9.50
 -11   0   1  114.89    9.20
   0 -11   1  105.79    9.70
  11   0   1  119.19    7.40
   0 -11   1  114.69    9.90
 -11   1  -1  320.87   16.40
  11  -1  -1  332.67   18.10
  11  -1  -1  324.27   15.80
  11  -1   1  323.67   15.10
  11  -1   1  326.97   17.30
 -11   1   1  333.57   17.30
  -2 -11  -1  304.77   16.20
  -2 -11  -1  327.37   17.20
  11  -2  -1  305.77   16.80
  -2 -11  -1  305.97   17.20
 -11   2  -1  289.77   15.00
  11  -2  -1  288.87   14.70
 -11   2   1  291.77   15.90
  11  -2   1  299.37   13.80
  -2 -11   1  263.17   16.50
  11  -2   1  287.07   15.90
  -2 -11   1  282.07   17.10
 -11   3  -1 1243.88   50.39
  11  -3  -1 1258.57   52.29
   3  11  -1 1170.18   47.60
  11  -3  -1 1212.88   50.09
  11  -3   1 1219.58   51.39
  11  -3   1 1223.98   49.10
  -3 -11   1 1238.68   52.39
 -11   3   1 1272.97   51.39
  -3 -11   1 1227.98   51.89
  -4 -11  -1   55.29    8.40
  -4 -11  -1   55.79    9.00
 -11   4  -1   39.30    5.20
  11  -4  -1   37.50    5.30
  -4 -11  -1   47.20    7.20
  11  -4   1   37.50    4.90
  11  -4   1   47.40    6.60
  -4 -11   1   56.09    8.20
  11  -5  -1   16.80    4.60
 -11   5  -1   16.10    3.50
  11  -5  -1   16.00    4.00
   5  11  -1   15.70    2.40
 -11   5   1   13.50    4.00
  -5 -11   1   10.30    4.40
  11  -5   1   14.90    3.10
  -5 -11   1    8.00    5.20
  11  -5   1   15.20    4.20
   5  11   1   19.10    3.90
   6  11  -1  109.69    6.00
  11  -6  -1   95.69    8.40
 -11   6  -1  102.49    7.90
  11  -6  -1  110.49   10.00
  -6 -11  -1  112.89   10.30
   6  11   1   94.89    7.90
  11  -6   1   97.19    8.60
 -11   6   1   94.59    8.30
  -6 -11   1  112.09   10.20
  11  -6   1  103.59    7.20
  11  -7  -1  697.93   32.60
  11  -7  -1  738.43   31.70
   7  11  -1  684.93   28.60
  -7 -11  -1  715.43   33.60
 -11   7   1  688.93   31.60
  -7 -11   1  669.43   33.40
  11  -7   1  753.12   30.00
  11  -7   1  695.73   32.30
   7  11   1  682.73   30.30
  11  -8  -1  150.18   11.10
   8  11  -1  146.59    8.40
  -8 -11  -1  194.58   16.80
  11  -8  -1  154.28   11.70
  -8 -11   1  148.59   12.80
  11  -8   1  155.58    9.60
   8  11   1  191.18   10.60
 -11   8   1  157.88   10.90
   9  11  -1  140.49    7.90
  11  -9  -1  135.79   11.20
  11  -9   1  140.69    9.30
 -11   9   1  148.79   10.60
   9  11   1  141.79    9.70
  -9 -11   1  142.99   12.80
  11 -10  -1   30.30    6.20
  10  11  -1   38.40    4.70
 -10 -11   1   28.50    6.30
  10  11   1   30.70    5.00
  11 -10   1   25.00    4.80
  11  11  -1   27.00    3.80
  11 -11  -1   29.20    6.20
  11  11   1   31.00    5.30
  11 -11   1   25.10    4.70
 -11 -11   1   24.00    7.30
  12  11  -1   -0.50    2.60
  11 -12  -1   -4.10    3.90
  11 -12   1   -1.40    3.30
  12  11   1    7.20    3.50
  12  10  -1   29.50    4.20
  10 -12  -1   30.40    6.50
  10 -12   1   26.10    5.40
  12  10   1   30.00    5.10
   9 -12  -1   10.80    5.10
  12   9  -1    7.40    3.10
 -12  -9   1    9.80    4.80
  12   9   1    1.40    3.30
   9 -12   1   25.20    4.60
   8 -12  -1   -3.50    3.60
  12   8  -1   -0.30    2.20
   8 -12   1   -2.20    2.90
 -12  -8   1    1.80    3.30
  12   8   1   -0.30    2.50
  -8  12   1   -0.50    2.70
   7 -12  -1   13.50    4.90
  12   7  -1   13.20    3.40
  12   7  -1   13.10    4.80
   7 -12  -1   16.50    4.20
   7 -12   1   13.50    3.90
  -7  12   1   13.50    4.20
 -12  -7   1   19.10    5.10
  12   7   1   14.80    3.80
  12   6  -1   80.09    9.20
  12   6  -1   74.39    6.60
   6 -12  -1  110.29    8.50
   6 -12  -1  101.29    9.90
   6 -12   1   70.19    7.10
 -12  -6   1   90.99    9.40
  -6  12   1   97.59    8.70
  12   6   1   73.49    6.90
  12   5  -1  121.99    8.50
   5 -12  -1  119.39   10.80
  12   5  -1  148.39   11.80
 -12  -5  -1  155.28   16.20
   5 -12  -1  139.59   10.10
  -5  12  -1  138.99   12.20
  12   5   1  133.59    8.90
   5 -12   1  126.49    8.90
   5 -12   1  132.29    9.80
 -12  -5   1  146.19   11.80
  -5  12   1  136.89   10.50
  12   5   1  139.49   11.30
 -12  -4  -1   24.10    4.80
  12   4  -1   19.10    5.20
   4 -12  -1   18.60    5.40
  12   4  -1   26.00    3.90
   4 -12  -1   22.40    4.90
  -4  12  -1   19.10    4.90
  -4  12   1   19.60    4.80
   4 -12   1   20.30    3.80
  12   4   1   22.10    5.10
 -12  -4   1   27.00    5.00
  12   4   1   25.40    4.10
   4 -12   1   20.80    4.60
  12   3  -1   53.29    5.80
   3 -12  -1   49.20    6.90
  12   3  -1   56.89    7.60
  -3  12  -1   55.89    7.30
   3 -12  -1   52.29    6.50
 -12  -3  -1   50.09    6.50
 -12  -3   1   56.99    7.30
  -3  12   1   52.49    7.20
   3 -12   1   60.89    7.10
  12   3   1   72.99    6.00
   3 -12   1   53.09    5.60
  12   3   1   58.59    7.30
   2 -12  -1    5.40    3.20
 -12  -2  -1    8.00    3.40
  12   2  -1    6.40    3.60
   2 -12  -1    9.70    4.60
  12   2  -1    9.80    3.10
  12   2   1    5.80    2.70
  -2  12   1    2.90    3.80
  12   2   1    6.00    3.30
   2 -12   1    5.50    3.90
 -12  -2   1    6.80    3.70
   1 -12  -1  137.29    9.70
  12   1  -1  110.89   10.10
 -12  -1  -1  118.59    8.90
  12   1  -1  118.89    8.20
  -1  12   1  123.79   10.70
  12   1   1  117.79    9.70
   1 -12   1  131.69    9.90
 -12  -1   1  118.59    9.80
  12   1   1  112.59    7.70
  12   0  -1   31.90    5.70
 -12   0  -1   33.70    5.00
   0 -12  -1   32.70    6.60
  12   0  -1   29.90    4.60
   0  12   1   34.20    6.00
  12   0   1   22.60    4.70
  12   0   1   35.70    4.30
   0 -12   1   34.10    6.00
   0 -12   1   36.40    5.70
 -12   0   1   28.40    5.10
  -1 -12  -1   73.89    9.50
 -12   1  -1   81.49    7.20
  -1 -12  -1   96.89    8.60
  12  -1  -1   79.09    7.10
  12  -1  -1   74.49    8.90
  -1 -12  -1   82.49    9.40
  -1 -12   1   93.19    9.40
  -1 -12   1   81.49    8.60
  12  -1   1   78.39    8.20
 -12   1   1   83.29    8.10
  12  -1   1   81.79    6.20
  -2 -12  -1   -1.90    3.50
 -12   2  -1    1.40    2.40
  -2 -12  -1   -6.80    5.10
  -2 -12  -1    1.70    3.00
  12  -2  -1   -3.30    2.50
  12  -2  -1   -2.60    2.70
  -2 -12   1   -2.90    3.60
  12  -2   1   -1.60    1.90
  12  -2   1   -1.90    2.60
 -12   2   1   -4.00    2.40
  -2 -12   1   -3.70    3.60
  -3 -12  -1   80.39   11.00
  -3 -12  -1   65.89    9.40
  -3 -12  -1   69.69    9.20
  12  -3  -1   68.09    8.10
  12  -3  -1   58.69    6.50
 -12   3  -1   61.79    6.30
  12  -3   1   63.69    5.50
  12  -3   1   62.89    7.30
 -12   3   1   62.49    7.20
  12  -4  -1   12.10    3.70
  12  -4  -1   10.20    4.40
  -4 -12  -1   23.10    6.80
   4  12  -1   11.70    2.00
  -4 -12  -1    4.50    6.00
 -12   4  -1   10.50    3.40
  -4 -12   1   12.10    5.40
  12  -4   1   12.70    3.00
  -4 -12   1   18.20    5.70
  12  -4   1    7.30    4.10
 -12   4   1    8.50    3.60
   5  12  -1  203.98   10.00
  12  -5  -1  216.68   14.40
  12  -5  -1  217.08   13.10
  -5 -12  -1  250.37   16.20
  -5 -12   1  208.38   14.90
  12  -5   1  218.78   14.00
  -5 -12   1  215.18   14.50
  12  -5   1  230.38   11.70
 -12   5   1  224.78   13.40
   5  12   1  221.18   12.30
  12  -6  -1   10.00    4.50
  12  -6  -1   10.30    4.10
   6  12  -1   11.90    2.30
  -6 -12  -1    8.00    4.50
 -12   6   1    8.10    3.80
   6  12   1   12.70    3.80
  12  -6   1   12.30    3.60
  -6 -12   1   16.70    5.10
   7  12  -1   53.39    4.50
  12  -7  -1   58.29    7.20
  12  -7  -1   51.59    7.70
  12  -7   1   53.29    5.90
  -7 -12   1   60.89    8.70
 -12   7   1   54.49    6.80
   7  12   1   48.50    6.10
  12  -8  -1   21.30    5.30
   8  12  -1   18.50    3.00
  12  -8   1   19.60    4.10
  -8 -12   1   22.30    6.10
   8  12   1   24.30    4.80
  12  -9  -1   30.00    6.10
   9  12  -1   43.60    4.60
   9  12   1   35.30    5.80
  12  -9   1   36.20    5.30
  -9 -12   1   49.99    8.50
  10  12  -1    0.30    2.10
  12 -10  -1   -1.20    3.90
  10  12   1    4.50    3.30
  12 -10   1   -0.10    3.20
 -10 -12   1    3.00    4.10
  12 -11  -1   38.30    7.30
  11  12  -1   37.10    4.90
  11  12   1   47.40    6.40
  12 -11   1   40.80    6.10
  12  12  -1   -2.20    2.50
  12 -12  -1    3.90    5.10
  12  12   1    4.70    3.50
  12 -12   1    1.30    3.60
  12 -13  -1    9.50    5.70
  13  12  -1    1.70    2.90
  13  12   1    4.00    3.50
  12 -13   1    1.40    4.00
  11 -13  -1  120.89   12.40
  13  11  -1  129.89    8.70
  13  11   1  121.79    9.50
  11 -13   1  154.08   11.40
  13  10  -1    6.30    3.10
  10 -13  -1    9.90    4.90
  13  10   1    4.10    3.40
  10 -13   1    1.80    3.90
  13   9  -1  210.08   11.30
   9 -13  -1  174.88   14.60
  13   9   1  203.08   12.00
   9 -13   1  209.38   12.70
   8 -13  -1   52.69    7.80
  13   8  -1   54.59    5.90
  13   8   1   53.99    6.50
   8 -13   1   46.10    6.50
  13   7  -1   -0.10    2.90
   7 -13  -1    3.40    4.50
  13   7   1   -2.00    2.90
 -13  -7   1    5.20    3.80
  -7  13   1    4.60    3.90
   7 -13   1    8.90    3.90
   6 -13  -1    9.30    4.90
   6 -13  -1   18.90    4.40
  13   6  -1   15.60    5.30
  13   6  -1   13.50    3.40
 -13  -6   1   14.80    4.80
  -6  13   1    9.20    4.20
   6 -13   1   14.00    3.80
   5 -13  -1   91.49    9.60
   5 -13  -1   93.99    8.70
  13   5  -1   97.09    7.40
  13   5  -1   98.49    9.90
  -5  13   1   99.49    9.30
   5 -13   1  101.09    7.80
  13   5   1  104.09    7.70
 -13  -5   1  100.19    9.70
  13   4  -1  203.88   14.20
   4 -13  -1  192.28   13.50
   4 -13  -1  201.68   12.60
  13   4  -1  205.68   11.30
   4 -13   1  188.68   11.30
 -13  -4   1  205.98   13.90
  13   4   1  201.68   11.30
  -4  13   1  208.58   13.90
  13   3  -1    2.90    3.50
   3 -13  -1   -4.20    3.50
  13   3  -1   -2.20    2.70
   3 -13  -1    1.00    2.80
 -13  -3   1   -0.50    3.20
  13   3   1    4.20    2.80
  -3  13   1    0.50    3.30
  13   2  -1   70.59    6.50
   2 -13  -1   68.39    9.00
   2 -13  -1   66.69    7.60
  13   2  -1   65.49    8.40
   2 -13   1   59.29    8.80
 -13  -2   1   68.39    8.30
  13   2   1   58.99    6.10
  -2  13   1   74.69    8.90
  13   2   1   63.99    9.30
  13   1  -1    9.90    4.90
   1 -13  -1   12.00    5.60
  13   1  -1    8.10    3.30
   1 -13  -1    9.20    4.00
  13   1   1   10.90    3.20
 -13  -1   1   16.00    4.40
   1 -13   1   14.10    4.10
  -1  13   1    9.00    5.10
  13   1   1    6.00    4.00
  -1 -13  -1  798.42   35.80
  13  -1  -1  788.02   33.70
  13  -1  -1  785.72   36.40
  -1 -13  -1  768.22   35.50
  -1 -13   1  749.73   35.30
  -1 -13   1  795.42   35.20
 -13   1   1  819.12   35.60
  13  -1   1  769.92   35.90
  13  -1   1  769.52   32.70
  13  -2  -1   31.40    6.20
  13  -2  -1   33.30    4.90
  13  -2   1   24.60    7.80
  -2 -13   1   28.30    6.50
  13  -2   1   32.30    4.30
 -13   2   1   23.60    5.50
  -2 -13   1   29.90    6.80
  13  -3  -1  869.01   40.00
  -3 -13  -1  849.02   39.50
  -3 -13  -1  949.51   40.20
  13  -3  -1  816.62   37.40
 -13   3   1  916.41   39.00
  -3 -13   1  922.41   40.50
  13  -3   1  864.21   36.40
  -3 -13   1  862.81   39.30
  13  -4  -1   38.80    6.70
  13  -4  -1   28.10    5.30
 -13   4   1   41.50    6.30
  13  -4   1   38.30    5.00
  -5 -13  -1   27.90    7.10
  13  -5  -1   18.90    5.60
  13  -5  -1   14.80    4.10
  -5 -13   1   12.40    4.70
   5  13   1   13.90    3.90
  13  -5   1   22.90    3.90
 -13   5   1   16.80    4.00
  13  -6  -1   -5.40    3.10
  -6 -13   1   -0.10    3.40
 -13   6   1   -1.50    3.40
  13  -6   1   -0.50    2.80
   6  13   1   -0.50    2.70
   7  13  -1  614.64   27.10
  13  -7  -1  622.74   29.20
  13  -7   1  635.94   27.60
   7  13   1  640.44   27.90
  -7 -13   1  614.34   31.20
  13  -8  -1   -1.50    3.70
   8  13   1    5.10    3.50
  -8 -13   1    4.20    4.60
   9  13  -1  326.97   15.60
  13  -9  -1  336.87   19.20
   9  13   1  339.77   17.30
  13  -9   1  351.96   17.60
  -9 -13   1  344.57   21.10
  10  13  -1    5.30    2.50
  13 -10  -1   -0.50    4.20
  13 -10   1    1.90    3.60
  10  13   1    4.00    3.40
  11  13  -1   26.50    4.00
  13 -11  -1   20.50    6.90
  11  13   1   27.70    5.30
  13 -11   1   23.70    5.50
  12  13  -1   60.99    6.10
  13 -12  -1   49.90    8.30
  13 -12   1   53.99    7.30
  12  13   1   61.79    7.30
  13  13  -1  133.09    9.90
  13 -13   1  138.09   11.90
  13  13   1  147.59   10.50
  14  13  -1   59.29    8.30
  13 -14  -1   81.49   11.10
  14  13   1   82.79    8.20
  12 -14  -1    4.70    5.80
  14  12  -1    2.60    3.30
  14  12   1    8.40    4.00
  14  11  -1   30.60    4.90
  11 -14  -1   29.50    7.70
  14  11   1   32.90    5.50
  14  10  -1    4.30    3.20
  10 -14  -1    5.00    5.10
  14  10   1    4.20    3.30
  14   9  -1   13.00    3.60
   9 -14  -1   10.60    5.30
  14   9   1   15.70    4.10
   8 -14  -1   19.00    5.80
  14   8  -1   20.90    4.30
  14   8   1   31.90    4.90
   7 -14  -1   30.90    7.00
  14   7   1   34.40    5.10
   6 -14  -1    1.10    4.40
  14   6  -1    4.60    2.90
  14   6   1    3.80    2.90
  14   5  -1   14.00    3.80
   5 -14  -1   20.90    5.60
  14   5   1   14.70    3.90
  -5  14   1   21.80    5.70
   4 -14  -1    4.50    4.30
  14   4  -1    3.10    3.10
  -4  14   1    9.40    4.40
 -14  -4   1    4.30    3.40
  14   4   1    3.20    2.90
  14   3  -1   11.80    3.80
   3 -14  -1   11.20    5.10
  -3  14   1   12.40    4.90
 -14  -3   1    8.70    4.00
  14   3   1   16.20    3.60
  14   2  -1    2.30    3.50
  14   2  -1   -1.80    2.90
   2 -14  -1    0.40    4.30
  -2  14   1    3.70    4.80
  14   2   1   -0.60    2.60
 -14  -2   1    1.80    3.40
   1 -14  -1    0.90    4.30
  14   1  -1    1.90    3.80
  14   1  -1   -3.90    2.60
  -1  14   1   -1.70    3.70
 -14  -1   1    1.40    3.00
  14   1   1   -0.50    2.30
  14   0  -1    6.70    3.60
  14   0  -1   10.00    4.60
   0 -14  -1    8.70    5.30
   0 -14  -1    2.30    4.80
   0 -14   1    3.60    4.40
 -14   0   1    5.30    4.00
  14   0   1    8.90    3.10
  -1 -14  -1   88.89   10.20
  -1 -14  -1   93.09   10.90
  14  -1  -1   81.19    7.60
  14  -1  -1   91.79   10.40
 -14   1   1   87.99    9.00
  14  -1   1   95.89    7.00
  -1 -14   1   97.69    9.80
  -2 -14  -1    1.10    4.20
  -2 -14  -1   -3.50    5.20
  14  -2  -1    0.80    2.80
 -14   2   1   -2.20    2.80
  -2 -14   1    1.40    4.30
  14  -2   1    3.40    2.60
  14  -3  -1   11.00    3.80
  -3 -14  -1    9.70    6.20
  -3 -14  -1    6.90    5.40
  -3 -14   1   22.10    6.90
 -14   3   1    6.90    4.50
  14  -3   1    9.70    3.10
  14  -4  -1   77.19    8.00
  14  -4   1   68.99    6.70
  -4 -14   1   77.89   11.00
   4  14   1   80.89    7.20
  14  -5  -1  222.68   13.70
  -5 -14   1  224.08   15.70
  14  -5   1  219.68   12.30
   5  14   1  217.18   12.60
  14  -6  -1   45.50    6.90
  14  -6   1   65.19    7.10
   6  14   1   53.49    6.90
   7  14   1   26.10    4.70
  14  -7   1   24.70    4.50
  -7 -14   1   11.40    5.20
  14  -8  -1   -5.40    3.60
  14  -8   1    2.30    3.10
   8  14   1   -0.40    3.40
  -8 -14   1   17.90    5.70
  14  -9  -1   51.19    7.90
  14  -9   1   58.69    7.40
   9  14   1   53.69    7.10
  14 -11  -1   36.20    7.50
  14 -11   1   28.30    5.80
  11  14   1   39.10    6.10
  14 -12  -1   17.00    6.20
  12  14   1   11.20    4.30
  14 -12   1   13.30    5.10
  14 -13  -1    1.10    5.30
  13  14   1    8.60    4.20
  14 -13   1    4.40    4.80
  14 -14  -1    6.00    6.00
  14  14   1    4.10    3.70
  14 -15  -1   36.40    8.70
  15  14   1   33.00    5.90
  13 -15  -1    0.70    5.80
  15  13   1   -2.60    3.30
  12 -15  -1    6.40    5.80
  15  12  -1   -4.40    3.20
  15  12   1    0.20    3.40
  15  11  -1  231.18   13.70
  11 -15  -1  258.97   18.30
  15  11   1  249.78   14.30
  10 -15  -1   30.00    7.60
  15  10  -1   35.00    5.40
  15  10   1   39.70    5.70
  15   9  -1  261.97   14.30
   9 -15  -1  258.17   17.90
  15   9   1  264.07   14.70
   8 -15  -1   -5.90    4.40
  15   8  -1   -3.80    2.90
  15   8   1   -1.40    3.10
  15   7  -1    1.30    2.80
   7 -15  -1   -5.30    4.10
  15   7   1    0.80    3.00
  15   6  -1   33.10    5.10
   6 -15  -1   32.30    6.80
  15   6   1   31.20    4.90
  15   5  -1  194.28   11.80
   5 -15  -1  190.38   14.30
  15   5   1  192.08   11.50
  15   4  -1   35.70    5.30
   4 -15  -1   37.50    7.10
  15   4   1   36.90    5.20
   3 -15  -1  484.65   25.20
  15   3  -1  501.45   23.30
  15   3   1  497.35   22.90
  -3  15   1  522.95   29.30
  15   2  -1   -1.50    2.90
   2 -15  -1    1.80    5.00
  15   2   1   -1.20    2.70
  -2  15   1   -1.30    3.90
   1 -15  -1   18.60    5.90
  15   1  -1   13.80    4.00
  -1  15   1   24.10    6.00
  15   1   1    9.80    3.20
   1 -15   1    9.60    5.00
  15   0  -1  125.29    9.40
   0 -15  -1  127.89   11.60
  15   0   1  125.09    8.70
   0 -15   1  158.28   12.70
  -1 -15  -1   96.49   11.00
  15  -1  -1   92.99    8.30
  15  -1   1   99.49    7.50
  -1 -15   1  110.89   11.50
  -2 -15  -1   79.69   10.60
  15  -2  -1   85.99    8.00
  -2 -15   1   82.59   11.00
  15  -2   1   68.49    6.70
  -3 -15  -1   -5.80    5.60
  15  -3  -1    1.40    3.40
  15  -3   1    5.70    2.90
  -3 -15   1    1.70    6.30
  15  -4  -1    3.30    3.60
   4  15   1    3.80    3.30
  15  -4   1   -0.10    3.00
  -4 -15   1   12.70    5.80
  15  -5  -1   -1.00    3.80
  15  -5   1    3.70    3.20
   5  15   1    6.70    3.50
  -5 -15   1    6.90    4.70
  15  -6  -1   30.10    6.20
  15  -6   1   24.40    4.80
   6  15   1   31.50    5.10
  -6 -15   1   26.30    6.40
  15  -7  -1   64.69    8.40
   7  15   1   68.59    7.20
  15  -7   1   69.69    7.60
  -7 -15   1   56.09   12.10
  15  -8  -1  107.59   11.10
   8  15   1  121.19    9.50
  15  -8   1  137.39   10.10
  15  -9  -1   26.20    6.30
  15  -9   1   20.70    5.20
   9  15   1   20.10    4.80
  15 -10  -1   20.40    6.70
  15 -10   1   25.90    5.60
  10  15   1   26.40    5.60
  15 -11  -1  172.98   14.70
  11  15   1  172.88   11.60
  15 -11   1  169.48   13.10
  15 -12  -1   -7.20    4.80
  15 -12   1    2.10    4.30
  12  15   1    1.70    3.50
  15 -13  -1  400.66   23.90
  13  15   1  384.56   20.00
  15 -13   1  382.86   21.90
  15 -14  -1   -0.70    5.60
  14  15   1    0.60    3.60
  15 -15  -1    9.60    7.00
  15  15   1    3.90    3.90
  16  15   1   -3.60    3.50
  14 -16  -1    1.10    8.10
  16  14   1   -0.90    3.60
  13 -16  -1   13.40    7.10
  16  13   1    4.10    4.00
  16  12  -1   14.00    4.40
  12 -16  -1   17.20    7.30
  16  12   1   21.70    5.30
  11 -16  -1    6.00    6.00
  16  11  -1    5.00    3.90
  16  11   1    5.60    3.90
  10 -16  -1    7.40    6.00
  16  10  -1    2.40    3.60
  16  10   1    3.00    3.50
   9 -16  -1   60.19    9.90
  16   9  -1   63.29    7.40
  16   9   1   71.89    7.60
  16   8  -1   50.19    6.80
   8 -16  -1   39.80    8.30
  16   7  -1  118.49    9.00
   7 -16  -1   95.29   11.60
  16   7   1  108.79    8.80
  16   6  -1   34.10    5.30
   6 -16  -1   11.00    6.30
  16   5  -1    3.80    3.50
   5 -16  -1    9.10    5.60
  16   5   1    5.20    3.30
   4 -16  -1   11.80    5.50
  16   4  -1    8.90    3.90
  16   4   1    9.50    3.50
   3 -16  -1    8.20    5.60
  16   3  -1    7.40    3.80
  16   3   1    8.30    3.30
  16   2  -1   -3.60    3.00
   2 -16  -1   -5.10    4.40
  16   2   1    7.20    3.10
  16   1  -1   39.30    5.90
   1 -16  -1   45.30    7.40
   1 -16   1   36.00    7.40
  16   1   1   39.20    5.30
  16   0  -1    3.00    3.60
   0 -16  -1   30.00    6.70
  16   0   1    2.30    3.20
   0 -16   1    9.00    4.70
  -1 -16  -1    1.00    5.60
  16  -1  -1   -0.50    3.20
  -1 -16   1    1.80    4.40
  16  -1   1   -2.10    2.60
  16  -2  -1    2.00    3.30
  -2 -16  -1    6.70    6.20
  16  -2   1    2.40    3.00
  -2 -16   1   -0.50    4.80
  16  -3  -1   15.60    4.80
  -3 -16   1   42.30    9.60
  16  -3   1   16.00    4.20
  16  -4  -1    3.30    3.90
   4  16   1    7.30    4.20
  16  -4   1    6.60    3.60
  -4 -16   1    2.20    5.10
  16  -5  -1   -0.20    3.80
  -5 -16   1   -0.60    4.40
   5  16   1   -2.00    3.10
  16  -5   1   -4.30    3.10
  16  -6  -1    1.20    4.00
   6  16   1    0.50    2.90
  16  -6   1   -6.60    2.90
  16  -7  -1    1.70    4.00
  16  -7   1    0.30    3.30
   7  16   1   -0.10    3.70
  16  -8  -1   17.50    5.70
   8  16   1   20.90    5.80
  16  -8   1   20.30    5.10
  16  -9  -1   13.90    5.80
  16  -9   1    5.40    4.30
   9  16   1   14.20    5.90
  16 -10  -1   23.30    6.80
  16 -10   1   18.60    5.60
  10  16   1   26.20    8.30
  16 -11  -1    5.80    5.60
  16 -11   1    2.40    4.60
  16 -12  -1   -3.50    5.10
  16 -12   1   -1.50    4.40
  16 -13  -1    3.70    5.80
  16 -13   1    0.90    5.00
  16 -14  -1   23.10    7.90
  16 -15  -1   33.50    8.80
  17  15   1  120.39   11.30
  17  14   1    2.50    4.40
  17  13   1   12.70    5.00
  17  12  -1    9.50    4.50
  17  12   1    9.20    4.60
  17  11  -1   15.80    4.80
  17  11   1    5.40    4.10
  17  10  -1   60.49    7.80
  17  10   1   48.80    6.80
  17   9  -1    4.10    4.00
  17   9   1    1.60    3.60
  17   8  -1    9.90    4.30
  17   8   1   13.60    4.40
  17   7  -1    2.80    3.70
  17   7   1   -1.30    3.30
  17   6  -1   58.99    7.50
  17   6   1   46.50    6.40
  17   5  -1   61.69    7.50
  17   5   1   68.39    7.30
  17   4  -1   46.90    6.60
  17   4   1   61.19    6.90
  17   3  -1   21.20    5.10
  17   3   1   16.30    4.40
  17   2  -1   -3.90    3.30
  17   2   1   -0.90    3.20
   2 -17   1    0.40    4.40
  17   1  -1   71.19    8.20
   1 -17   1   78.39   10.60
  17   0  -1    5.00    3.90
   0 -17   1    0.30    4.50
  17   0   1    0.80    3.10
  17  -1  -1  454.75   23.30
  -1 -17   1  467.05   26.40
  17  -1   1  472.05   22.20
  17  -2  -1    5.30    4.00
  -2 -17   1    4.00    6.30
  17  -2   1    4.70    3.40
  17  -3  -1   94.29    9.90
  17  -3   1  103.19    8.80
  17  -4  -1   -1.50    4.10
  17  -4   1    0.20    3.20
  17  -5  -1   76.39    9.30
  17  -5   1   70.29    8.00
  17  -6  -1    2.70    4.50
  17  -6   1    2.00    3.70
  17  -7  -1   84.69   10.30
  17  -7   1   99.29    9.60
  17  -8  -1   36.00    7.60
  17  -8   1   38.00    6.50
  17  -9  -1   41.00    8.10
  17  -9   1   42.90    7.30
  17 -10  -1    3.40    6.30
  17 -10   1   -2.60    4.30
  17 -11  -1    5.20    6.30
  17 -11   1   11.50    5.30
  17 -12  -1   97.49   12.60
  17 -12   1   97.49   11.50
  17 -13  -1   -3.50    5.50
  17 -13   1    5.60    7.10
  17 -14  -1   20.80    8.10
  17 -15  -1    0.90    6.40
  18  13   1   27.70    6.10
  18  12  -1    5.20    4.60
  18  12   1    2.90    4.40
  18  11  -1    4.00    4.30
  18  11   1   10.50    4.60
  18  10  -1    8.30    4.40
  18  10   1    5.70    4.20
  18   9  -1   -5.30    3.50
  18   9   1    1.20    3.70
  18   8  -1    2.30    4.10
  18   8   1    3.60    3.80
  18   7  -1    2.30    3.90
  18   7   1    2.70    3.70
  18   6  -1   21.30    5.10
  18   6   1   16.40    4.80
  18   5  -1    2.10    3.90
  18   5   1    5.60    4.10
  18   4  -1    0.30    4.00
  18   4   1    2.20    3.70
  18   3  -1    0.90    4.10
  18   3   1    7.10    3.90
  18   1  -1   18.70    5.70
   1 -18   1   19.60    6.20
  18   1   1   18.50    4.70
  18   0  -1   -0.90    3.90
  18   0   1    0.90    3.40
   0 -18   1   -2.10    5.80
  18  -1  -1    5.40    4.30
  18  -1   1    3.40    3.50
  18  -2  -1    7.60    4.60
  18  -2   1    9.40    4.00
  18  -3  -1   89.69    9.90
  18  -3   1   91.29    8.70
  18  -4  -1    7.30    5.00
  18  -4   1   18.10    5.00
  18  -5  -1   57.09    8.80
  18  -5   1   62.29    7.80
  18  -6  -1    8.40    5.30
  18  -6   1    9.10    4.40
  18  -7  -1    8.30    5.40
  18  -7   1    5.30    4.50
  18  -8  -1   -0.80    5.10
  18  -8   1   -3.70    4.10
  18  -9  -1   -1.40    4.90
  18  -9   1   -0.60    4.50
  18 -10  -1   -0.50    5.80
  18 -10   1    3.50    4.90
  18 -11  -1    2.80    6.30
  18 -11   1    1.90    5.30
  18 -12  -1   -0.50    6.20
  18 -12   1    0.30    5.00
  18 -13  -1   -0.70    6.20
  19  12  -1    0.90    4.80
  19  12   1    4.40    4.60
  19  11  -1  156.18   12.30
  19  11   1  138.39   11.70
  19  10  -1   35.20    6.70
  19  10   1   23.30    5.90
  19   9  -1  159.38   12.30
  19   9   1  136.99   11.40
  19   8  -1    0.70    4.30
  19   8   1    0.00    3.90
  19   7  -1    8.30    4.80
  19   7   1    8.60    4.50
  19   6  -1   38.20    6.80
  19   6   1   43.50    6.70
  19   5  -1  102.99   10.60
  19   5   1  104.79   10.00
  19   4  -1   55.49    7.80
  19   4   1   51.29    7.10
  19   3  -1   74.09    9.20
  19   3   1   74.39    8.30
  19   2  -1   14.40    5.40
  19   2   1   10.30    4.50
  19   1  -1   -0.30    4.00
  19   1   1    3.20    3.80
  19   0  -1   55.59    8.40
  19   0   1   89.29    8.50
  19  -1  -1    2.20    4.50
  19  -1   1    4.70    4.00
  19  -2  -1    2.80    4.50
  19  -2   1    0.40    3.50
  19  -3  -1   42.70    7.80
  19  -3   1   50.09    7.10
  19  -4  -1    5.60    5.00
  19  -4   1    0.80    3.90
  19  -5  -1   41.00    7.70
  19  -5   1   39.40    6.90
  19  -6  -1    2.50    5.30
  19  -6   1   28.80    5.80
  19  -7  -1  168.68   14.80
  19  -7   1  175.78   13.60
  19  -8  -1    3.70    5.50
  19  -8   1    8.70    5.20
  19  -9  -1    0.90    6.20
  19  -9   1    2.30    5.00
  19 -10  -1   -0.70    6.10
  19 -10   1    6.60    5.50
  19 -11  -1  173.88   16.60
  19 -11   1  171.38   14.80
  19 -12  -1   11.50    7.30
  19 -12   1   20.20    7.00
  20  10  -1    3.70    5.10
  20  10   1    4.80    4.70
  20   9  -1   36.70    7.50
  20   8  -1    0.80    4.80
  20   8   1    3.00    4.40
  20   7  -1   46.60    7.60
  20   7   1   48.10    7.20
  20   6  -1    1.50    4.60
  20   6   1   -0.50    3.90
  20   5  -1   -0.70    4.40
  20   5   1    0.50    4.00
  20   4  -1    3.40    4.80
  20   4   1   -0.20    3.90
  20   3  -1    3.20    5.00
  20   3   1    3.60    4.40
  20   2  -1    6.00    5.00
  20   2   1    5.80    4.30
  20   1  -1    7.80    5.30
  20   1   1    5.10    4.30
  20   0  -1   -1.70    4.40
  20   0   1    0.90    4.10
  20  -1  -1    8.10    5.20
  20  -1   1   -0.80    4.10
  20  -2  -1   -1.40    4.50
  20  -2   1    3.20    4.10
  20  -3  -1    2.80    4.80
  20  -3   1    2.40    4.20
  20  -4  -1   -1.90    4.80
  20  -4   1   -0.60    4.00
  20  -5  -1   -4.80    5.10
  20  -5   1    5.20    4.90
  20  -6  -1    0.50    5.20
  20  -6   1    2.80    4.80
  20  -7  -1   -1.20    5.50
  20  -7   1    1.60    4.50
  20  -8  -1   -4.00    5.50
  20  -8   1    5.10    5.50
  20  -9  -1   17.50    7.40
  20  -9   1   21.40    6.80
  20 -10  -1    1.90    6.30
  20 -10   1    1.20    5.30
  21   8  -1   17.40    6.50
  21   8   1   -2.60    4.20
  21   7  -1   27.50    7.20
  21   7   1   29.60    6.20
  21   6  -1    5.50    5.10
  21   6   1    2.90    4.40
  21   5  -1  209.18   15.60
  21   5   1  230.18   15.00
  21   4  -1   -2.80    5.10
  21   4   1   -0.10    4.40
  21   3  -1   -1.00    4.70
  21   3   1    2.10    4.40
  21   2  -1    9.50    5.60
  21   2   1   12.50    5.10
  21   1  -1  151.38   13.50
  21   1   1  141.09   11.70
  21   0  -1   41.00    7.80
  21   0   1   41.70    7.10
  21  -1  -1  123.89   12.50
  21  -1   1  136.09   11.60
  21  -2  -1   10.70    6.10
  21  -2   1    6.70    5.20
  21  -3  -1    4.40    5.60
  21  -3   1   -2.20    4.50
  21  -4  -1    8.00    6.20
  21  -4   1   10.30    5.60
  21  -5  -1   17.10    7.00
  21  -5   1   31.40    7.20
  21  -6  -1   31.50    8.10
  21  -6   1   33.70    7.40
  21  -7  -1    0.70    6.10
  21  -7   1    8.60    5.60
  21  -8  -1   -3.40    5.60
  21  -8   1    0.90    5.40
  22   5  -1    8.30    5.90
  22   5   1    5.50    4.90
  22   4  -1   -1.00    5.30
  22   4   1    1.10    4.40
  22   3  -1   41.60    8.50
  22   3   1   51.59    8.00
  22   2  -1    3.40    5.70
  22   2   1    3.50    4.70
  22   1  -1   11.40    6.10
  22   1   1   18.40    5.90
  22   0  -1    3.30    5.60
  22   0   1    3.30    5.00
  22  -1  -1   20.30    7.10
  22  -1   1   18.80    6.30
  22  -2  -1   -1.70    5.80
  22  -2   1   -0.20    5.40
  22  -3  -1   35.40    8.30
  22  -3   1   42.20    8.20
  22  -4  -1    8.60    6.50
  22  -4   1    5.80    5.30
  22  -5  -1    6.90    6.60
  22  -5   1    1.70    5.10
   0   0  -2 2236.28   87.19
   1   0  -2  393.36   18.90
   0  -1  -2  421.06   19.50
   0   1  -2  442.56   19.10
  -1   0  -2  510.35   20.10
   1  -1  -2  144.89    7.80
   1   1  -2  115.49    6.90
  -1   1  -2  108.99    8.10
  -1   1   2  127.79    5.90
   2   1  -2 1022.20   42.10
  -2  -1  -2 1087.69   43.70
   1  -2  -2 1080.89   43.20
  -1   2  -2  974.90   42.30
   2   1  -2 1037.10   41.80
   1  -2  -2 1051.19   41.50
  -2  -1   2 1230.08   42.00
  -1   2   2 1008.90   41.30
   0   2  -2  216.48   11.20
   0  -2  -2  241.88   12.40
   2   0  -2  233.98   11.30
   2   0  -2  234.58   10.50
  -2   0   2  231.18   10.50
   0   2   2  267.27   10.30
   2  -1  -2  921.71   36.90
   2  -1  -2  949.60   37.90
   1   2  -2  903.51   37.10
  -1  -2  -2  943.31   38.80
  -2   1  -2  963.40   38.30
  -1  -2   2  886.41   36.70
  -2   1   2  964.50   36.90
   2  -2  -2   94.99    5.40
   2   2  -2   90.59    5.40
  -2  -2  -2   81.89    7.40
  -2   2  -2   84.99    6.70
   2   2  -2   95.09    5.40
  -2   2   2   98.49    5.20
  -2  -2   2   81.99    5.40
   2  -3  -2  202.78    9.70
   2  -3  -2  211.68   11.00
   3   2  -2  203.28   10.00
   3   2  -2  213.58    9.70
  -3  -2  -2  200.78   11.80
  -3  -2   2  206.68   10.00
  -2   3   2  197.38    9.50
   3   1  -2  881.21   36.70
   1  -3  -2  980.50   36.40
   3   1  -2  916.81   36.80
  -3  -1  -2  929.51   38.60
   1  -3  -2  969.40   38.20
  -1   3  -2  893.51   36.70
  -1   3   2  917.81   36.30
  -3  -1   2  866.51   36.70
   0  -3  -2   67.39    4.20
   3   0  -2   66.69    4.90
   0  -3  -2   70.29    6.20
   3   0  -2   72.59    5.00
   0   3  -2   67.79    4.90
  -3   0  -2   76.89    6.60
  -3   0   2   70.79    4.70
   0   3   2   62.39    4.30
   3  -1  -2   40.20    3.40
  -1  -3  -2   32.10    5.00
   3  -1  -2   34.60    4.20
  -3   1  -2   51.19    5.50
  -1  -3  -2   37.10    3.10
  -3   1   2   35.70    3.30
   1   3   2   43.60    3.70
  -2  -3  -2   75.89    6.90
   2   3  -2   75.09    4.90
   3  -2  -2   76.29    5.10
   2   3  -2   74.59    4.90
  -2  -3  -2   75.09    4.90
  -2  -3  -2   78.59    4.40
  -3   2   2   80.69    4.80
   2   3   2   82.59    4.90
  -2  -3   2   74.19    5.10
  -3  -3  -2 1511.05   61.39
  -3  -3  -2 1469.65   58.99
   3  -3  -2 1563.54   60.39
  -3  -3  -2 1416.56   58.59
   3   3  -2 1573.04   59.69
   3   3  -2 1479.45   58.79
   3  -3  -2 1627.04   59.69
   3   3   2 1402.16   58.79
  -3  -3   2 1448.36   59.59
   3  -3   2 1474.45   58.49
  -3   3   2 1673.83   59.39
   4   3  -2   91.99    5.20
   3  -4  -2   61.29    6.00
   3  -4  -2   72.09    5.20
   4   3  -2   76.69    5.60
  -4  -3   2   79.99    5.90
   4   3   2   73.49    4.90
   3  -4   2   82.99    4.20
  -3   4   2   76.79    5.10
   4   2  -2  239.18   11.30
   2  -4  -2  227.88   11.90
   4   2  -2  233.68   10.60
   2  -4  -2  223.88   10.60
  -4  -2  -2  227.78   12.90
   4   2   2  217.78   10.10
   2  -4   2  215.68    9.90
  -2   4   2  216.08   10.40
   2  -4   2  218.88    9.40
  -4  -2   2  213.78   11.00
   4   1  -2  452.45   19.30
   4   1  -2  441.56   18.90
  -1   4  -2  400.16   18.40
   1  -4  -2  446.36   18.50
  -4  -1  -2  510.15   21.40
   1  -4  -2  433.66   20.30
   1  -4   2  429.36   18.40
  -4  -1   2  425.16   19.00
   0  -4  -2  387.46   16.10
   0  -4  -2  353.46   18.00
   4   0  -2  421.86   17.10
   4   0  -2  406.86   16.90
   0   4  -2  343.27   15.80
   0  -4   2  337.47   16.10
  -4   0   2  401.76   16.90
   0   4   2  371.96   16.20
   4   0   2  402.56   16.50
   0  -4   2  372.66   15.70
   1   4  -2  267.87   11.90
   4  -1  -2  306.47   13.30
   4  -1  -2  273.87   12.90
   4  -1   2  285.17   12.40
  -4   1   2  278.67   12.80
  -1  -4   2  253.67   12.60
   4  -2  -2   32.20    4.00
   2   4  -2   41.80    3.30
  -2  -4  -2   44.80    3.90
  -2  -4  -2   38.60    5.20
  -2  -4  -2   42.60    3.30
   2   4  -2   42.10    3.90
  -4   2   2   34.80    3.50
  -2  -4   2   41.50    3.90
   4  -2   2   42.50    3.30
   2   4   2   35.40    4.00
  -3  -4  -2   58.29    6.80
   3   4  -2   82.49    5.50
   4  -3  -2   64.79    5.60
   3   4  -2   77.99    4.40
   4  -3  -2   60.39    5.10
  -3  -4  -2   58.29    4.70
  -3  -4  -2   76.29    4.60
  -4   3   2   63.49    4.90
  -3  -4   2   63.19    5.20
   4  -3   2   67.29    4.10
   4   4  -2   35.10    3.50
  -4  -4  -2   52.59    6.50
  -4  -4  -2   37.80    3.80
   4   4  -2   46.40    4.40
   4  -4  -2   50.79    4.60
  -4  -4  -2   33.80    3.70
   4  -4   2   34.10    2.70
  -4   4   2   32.90    3.70
   4   4   2   35.90    3.70
   4  -4   2   35.40    3.10
  -4   5  -2  186.98    9.20
   5   4  -2  198.98   10.70
   4  -5  -2  194.38   11.10
   5   4  -2  202.78    9.40
  -5  -4  -2  173.08   12.30
  -5  -4  -2  190.38    9.90
   4  -5  -2  204.98   10.30
  -4   5   2  195.58    9.90
   4  -5   2  190.28    8.30
   4  -5   2  192.88    9.10
  -5  -4   2  192.38   10.70
   5   4   2  187.38    9.80
  -5  -3  -2  188.88    9.40
  -3   5  -2  184.38    9.10
   3  -5  -2  203.78    9.90
   5   3  -2  188.08   10.40
   5   3  -2  216.58    9.60
   3  -5  -2  187.18   11.00
  -5  -3   2  183.78   10.30
   3  -5   2  181.58    9.00
  -3   5   2  196.58    9.70
   5   3   2  188.88    9.60
   3  -5   2  190.88    8.10
   2  -5  -2  113.09    7.70
   5   2  -2   94.49    5.80
   5   2  -2   97.69    6.60
   2  -5  -2  108.39    6.10
   2  -5   2   85.39    4.30
  -5  -2   2   87.69    6.30
   5   2   2   95.79    5.70
   5   2   2   83.19    5.90
  -2   5   2   96.39    5.90
   2  -5   2   90.09    5.50
   1  -5  -2  348.57   17.30
   1  -5  -2  349.77   15.40
   5   1  -2  354.26   15.70
   5   1  -2  376.56   16.50
   5   1   2  351.16   15.20
   1  -5   2  340.67   15.30
   5   1   2  348.27   15.60
  -5  -1   2  353.06   16.10
  -1   5   2  342.97   15.50
   0  -5  -2   16.10    2.50
   0  -5  -2   10.60    3.70
   5   0  -2   15.30    2.70
   5   0  -2   14.60    2.90
   0   5   2   13.00    2.50
   5   0   2   16.20    2.60
  -5   0   2   13.90    2.70
  -1  -5  -2  203.58   11.90
  -1  -5  -2  202.38    9.40
   5  -1  -2  184.88   10.00
   5  -1  -2  183.88   10.00
  -5   1   2  180.38    9.80
   1   5   2  214.78   10.00
   5  -1   2  181.98    9.30
  -1  -5   2  199.78   10.10
   2   5  -2  417.36   17.10
   5  -2  -2  412.66   17.70
   5  -2  -2  377.06   17.40
  -2  -5  -2  366.96   16.50
   2   5  -2  423.56   15.80
  -2  -5  -2  356.66   18.70
  -2  -5  -2  364.96   16.90
   5  -2   2  382.16   16.40
  -5   2   2  400.66   17.20
  -2  -5   2  358.76   17.10
   2   5   2  370.26   17.10
   5  -2   2  371.26   16.10
   3   5  -2  124.09    7.50
   5  -3  -2  120.49    7.60
   5  -3  -2  105.29    7.70
   3   5  -2  135.29    6.30
  -3  -5   2  112.29    7.60
  -5   3   2  147.89    7.60
   5  -3   2  116.19    6.20
   4   5  -2    8.90    1.80
  -4  -5  -2   12.50    2.60
   5  -4  -2    6.40    2.70
   5  -4  -2    8.00    2.50
   4   5  -2   10.50    2.60
  -4  -5  -2   11.60    4.10
  -4  -5  -2   10.80    2.50
  -4  -5   2   11.40    2.90
  -5   4   2   11.70    2.70
   5  -4   2   10.10    1.80
   4   5   2    8.90    2.10
   5  -4   2   10.30    1.70
  -5  -5  -2   98.09    6.50
  -5   5  -2   91.09    5.70
   5  -5  -2   90.19    6.70
  -5  -5  -2   96.09    6.80
  -5  -5  -2  123.79    9.80
   5  -5  -2   84.19    7.40
   5   5  -2  101.59    7.20
   5   5   2   93.69    6.50
  -5  -5   2  105.39    7.40
   5  -5   2   82.09    4.90
   5  -5   2   95.29    5.70
  -5   5   2  104.39    6.70
  -5   6  -2   38.10    3.80
   5  -6  -2   31.50    4.30
  -6  -5  -2   34.40    4.30
   6   5  -2   27.50    3.80
   6   5  -2   39.70    5.00
   5  -6  -2   27.50    5.00
   6   5   2   37.30    4.30
   5  -6   2   34.90    2.60
  -5   6   2   34.10    4.40
  -6  -5   2   40.00    5.30
   5  -6   2   36.30    3.70
   6   5   2   37.00    4.70
   6   4  -2   73.59    4.90
   4  -6  -2   68.79    6.70
  -4   6  -2   58.19    4.80
  -6  -4  -2   54.09    5.20
   6   4  -2   66.19    6.10
   4  -6  -2   64.59    5.40
   4  -6   2   64.49    3.30
   6   4   2   64.09    5.40
   4  -6   2   60.79    4.70
  -6  -4   2   60.79    6.00
   6   4   2   69.29    5.70
  -4   6   2   51.89    5.20
   3  -6  -2  497.95   21.20
  -3   6  -2  466.55   20.60
  -6  -3  -2  462.85   20.80
   6   3  -2  509.55   22.20
   6   3  -2  492.15   20.70
   3  -6  -2  469.65   22.40
   6   3   2  492.95   21.20
   3  -6   2  481.35   19.00
  -3   6   2  494.95   21.20
   6   3   2  474.55   21.20
  -6  -3   2  480.45   22.00
   3  -6   2  492.65   20.50
   6   2  -2  105.09    7.40
   2  -6  -2  113.69    8.40
  -6  -2  -2  107.59    6.30
   2  -6  -2  109.89    6.70
   6   2  -2  119.59    6.80
   2  -6   2  113.89    6.50
   6   2   2  109.59    6.90
  -2   6   2  107.29    6.70
  -6  -2   2  107.69    7.50
   6   2   2  106.29    6.60
   6   1  -2  331.57   15.40
   6   1  -2  316.67   14.30
  -6  -1  -2  307.77   13.60
   1  -6  -2  317.07   14.20
   1  -6  -2  304.47   16.00
   6   1   2  314.37   14.30
   6   1   2  300.87   13.90
   1  -6   2  304.37   14.10
  -1   6   2  304.07   14.30
  -6  -1   2  302.47   14.90
   6   0  -2  176.48    9.70
   6   0  -2  173.58   10.20
   0  -6  -2  213.88   11.80
   6   0   2  173.98    8.90
   0  -6   2  167.18    9.40
  -6   0   2  177.78    9.90
   6   0   2  183.08    9.20
   0   6   2  220.48   10.10
   0  -6   2  161.28    9.50
  -1  -6  -2    1.90    3.30
   6  -1  -2    5.60    2.30
   6  -1  -2    1.90    2.00
  -1  -6  -2    8.10    2.10
  -6   1   2    3.30    1.90
  -1  -6   2    4.50    2.50
   6  -1   2    5.20    1.70
   6  -1   2    3.80    1.80
   1   6   2    8.70    2.30
   6  -2  -2   31.50    4.60
   6  -2  -2   37.50    4.70
  -6   2   2   33.80    4.10
   6  -2   2   32.10    3.50
   6  -2   2   42.40    3.60
  -3  -6  -2  115.99    7.10
   6  -3  -2  113.99    7.90
  -3  -6  -2  122.49    9.70
  -3  -6  -2  106.49    7.70
   6  -3  -2  129.29    8.20
   3   6  -2  129.99    6.00
  -6   3   2  114.39    7.30
   6  -3   2  109.69    6.30
   6  -3   2  116.09    6.50
  -3  -6   2  126.19    7.90
   4   6  -2  232.48   12.10
  -6   4  -2  223.98   10.40
   6  -4  -2  234.48   12.10
   4   6  -2  227.08   10.10
   6  -4  -2  219.58   12.10
  -4  -6  -2  225.78   13.90
  -4  -6  -2  210.58   11.60
  -4  -6  -2  212.48   11.40
   6  -4   2  213.78   10.10
  -4  -6   2  227.18   12.30
   6  -4   2  235.68   10.80
  -6   4   2  221.78   11.50
   6  -5  -2  295.17   14.60
  -5  -6  -2  286.37   14.10
  -6   5  -2  270.67   12.60
  -5  -6  -2  277.07   13.60
   5   6  -2  266.57   12.20
  -5  -6  -2  289.97   16.40
   5   6  -2  265.97   14.10
   6  -5  -2  294.17   14.30
   5   6   2  257.87   13.40
   6  -5   2  267.67   11.80
   6  -5   2  265.07   12.60
  -6   5   2  278.47   13.60
  -5  -6   2  277.67   14.70
  -6  -6  -2   25.20    3.90
  -6   6  -2   24.70    3.40
  -6  -6  -2   20.90    4.10
   6  -6  -2   27.40    4.80
   6   6  -2   26.60    4.80
   6   6  -2   29.10    3.50
  -6  -6   2   25.00    4.50
   6  -6   2   26.70    3.50
   6  -6   2   23.10    2.50
   6   6   2   21.90    3.60
   6   6   2   19.30    3.90
  -6   6   2   20.50    3.50
  -7  -6  -2    9.80    2.80
   6  -7  -2    1.10    3.70
   7   6  -2    5.00    3.20
   6  -7  -2    7.90    3.00
   7   6  -2    5.60    2.30
  -6   7  -2    8.40    2.50
   7   6   2   10.60    2.70
   7   6   2   12.20    3.50
   6  -7   2    4.50    1.60
  -7  -6   2    5.00    3.30
   6  -7   2    4.60    2.30
  -6   7   2    6.60    2.80
   5  -7  -2  889.81   36.90
   7   5  -2  870.41   36.80
   5  -7  -2  859.41   35.80
   7   5  -2  849.91   34.50
  -7  -5  -2  834.92   35.70
  -5   7  -2  816.12   34.90
   5  -7   2  844.62   33.10
  -5   7   2  842.72   35.50
   5  -7   2  840.22   34.70
   7   5   2  813.42   35.40
   7   5   2  836.32   35.70
  -7  -5   2  864.91   36.80
  -7  -4  -2   90.89    6.60
   4  -7  -2   92.99    8.30
   4  -7  -2   90.19    6.90
   7   4  -2  105.39    8.00
  -4   7  -2   83.59    6.30
  -7  -4   2  102.69    7.70
   4  -7   2   97.39    4.50
  -4   7   2   86.39    6.70
   4  -7   2   87.39    6.20
   7   4   2   91.49    6.70
   7   4   2   81.19    6.50
   7   3  -2 1001.50   41.40
   7   3  -2 1023.20   39.70
  -3   7  -2  952.90   39.80
  -7  -3  -2  962.50   39.90
   3  -7  -2 1005.20   40.20
   3  -7  -2  989.50   41.60
   3  -7   2  996.40   39.60
  -7  -3   2  949.01   41.10
  -3   7   2  949.71   40.10
   7   3   2  970.10   40.10
   7   3   2  967.00   40.30
   7   2  -2    7.80    2.70
   2  -7  -2   12.00    2.60
  -7  -2  -2   12.80    2.40
   7   2  -2    7.90    2.40
   7   2   2    9.00    2.40
  -2   7   2   10.60    2.60
   7   2   2    8.00    2.40
  -7  -2   2    9.60    2.80
   1  -7  -2   74.59    5.60
  -7  -1  -2   61.29    4.90
   7   1  -2   77.19    5.80
   1  -7  -2   64.49    7.20
   7   1  -2   74.49    6.60
   1  -7   2   83.89    6.00
  -7  -1   2   71.09    6.00
   7   1   2   63.39    5.40
  -1   7   2   67.79    5.80
   7   1   2   61.69    5.30
   0  -7  -2   -2.30    3.80
  -7   0  -2    0.10    1.50
   7   0  -2    3.10    2.50
   7   0  -2    5.10    2.20
   0  -7  -2    2.20    2.00
  -7   0   2    3.20    2.00
   0   7   2    3.30    2.50
   7   0   2    1.80    1.80
   0  -7   2   11.10    2.90
   7   0   2    4.50    2.10
   7  -1  -2  656.93   28.50
  -1  -7  -2  644.04   29.60
  -1  -7  -2  658.33   27.40
  -7   1  -2  649.43   26.50
   7  -1  -2  645.94   27.80
  -7   1   2  667.73   28.20
  -1  -7   2  635.54   27.70
  -1  -7   2  726.53   28.20
   7  -1   2  629.04   27.00
   7  -1   2  633.94   27.20
   1   7   2  626.74   28.00
  -2  -7  -2   55.39    7.30
  -2  -7  -2   56.59    5.00
   7  -2  -2   49.90    5.40
  -7   2  -2   59.49    4.10
   7  -2  -2   57.39    5.70
  -2  -7  -2   57.69    5.90
   7  -2   2   55.69    4.60
   2   7   2   59.29    6.00
   7  -2   2   56.49    4.70
  -7   2   2   58.99    5.50
  -2  -7   2   66.09    6.50
   7  -3  -2    0.80    2.80
   7  -3  -2   -1.60    2.00
  -3  -7  -2    4.30    3.80
  -7   3  -2   -1.50    1.20
   7  -3   2   -0.20    1.30
  -7   3   2   -1.70    1.60
   7  -3   2   -2.10    1.30
   7  -4  -2   24.80    4.40
   4   7  -2   42.00    5.10
  -4  -7  -2   40.40    6.40
  -4  -7  -2   44.20    5.90
  -7   5  -2   13.10    2.60
   5   7  -2   17.40    3.70
   7  -5  -2   17.40    4.00
   5   7  -2   14.20    2.40
   7  -5  -2   15.70    3.70
  -7   5   2   13.60    3.00
  -5  -7   2   20.70    4.20
   7  -5   2   15.60    3.00
   7  -5   2   16.80    2.30
  -7   6  -2  292.77   14.00
  -6  -7  -2  295.17   15.50
   7  -6  -2  295.67   15.70
   7  -6  -2  302.97   15.50
   7  -6   2  286.47   14.00
   7  -6   2  288.07   12.70
  -7   6   2  318.97   15.10
   6   7   2  288.77   14.90
   6   7   2  277.67   14.70
  -7  -7  -2  214.28   12.90
   7   7  -2  224.08   13.30
   7  -7  -2  229.38   13.60
  -7   7  -2  218.48   11.60
   7  -7  -2  238.28   13.20
   7   7  -2  229.28   11.00
   7  -7   2  222.28   10.20
   7   7   2  218.98   12.30
   7   7   2  216.68   12.60
  -7  -7   2  236.38   13.80
   7  -7   2  220.28   11.70
  -7   7   2  228.78   12.50
  -8  -7  -2  204.88   12.50
   8   7  -2  211.88   10.90
   7  -8  -2  213.38   12.90
  -7   8  -2  194.58   11.60
  -8  -7   2  211.28   13.70
  -7   8   2  211.78   12.50
   8   7   2  200.08   12.10
   7  -8   2  202.98   11.60
   7  -8   2  245.68   10.20
   8   7   2  210.38   12.50
  -6   8  -2   80.59    7.10
  -8  -6  -2  100.49    7.80
   6  -8  -2   99.09    7.90
   6  -8  -2   91.09    9.30
   8   6  -2   89.09    6.50
   8   6  -2   88.99    8.30
   6  -8   2   91.19    6.80
  -6   8   2   89.09    7.50
  -8  -6   2   91.19    8.70
   8   6   2   93.69    7.50
   6  -8   2  100.89    5.50
   8   6   2   95.79    7.60
   8   5  -2   83.69    7.90
   8   5  -2   80.69    6.10
   5  -8  -2   97.49    8.50
   5  -8  -2   89.99    7.10
  -8  -5  -2   81.59    6.90
  -5   8  -2   81.89    6.50
  -5   8   2   85.29    6.90
   8   5   2   78.39    6.70
   8   5   2   82.19    6.90
   5  -8   2   79.29    6.20
   5  -8   2   80.69    4.70
  -8  -5   2   81.99    7.80
   8   4  -2   50.49    5.10
  -4   8  -2   48.10    5.00
   4  -8  -2   41.60    5.30
   4  -8  -2   38.60    6.60
   8   4  -2   48.90    6.30
  -8  -4  -2   48.40    5.10
  -4   8   2   40.70    5.10
   8   4   2   40.00    5.10
   4  -8   2   50.09    3.20
  -8  -4   2   50.09    6.50
   8   4   2   44.90    5.10
   4  -8   2   54.69    5.10
   8   3  -2  550.04   25.30
  -3   8  -2  508.15   23.60
   8   3  -2  559.54   23.40
  -8  -3  -2  535.95   23.80
   3  -8  -2  534.65   25.60
   3  -8  -2  558.64   24.00
   3  -8   2  537.75   23.50
  -8  -3   2  551.54   25.30
  -3   8   2  542.75   24.10
   8   3   2  545.95   23.80
   8   3   2  540.55   24.20
   8   2  -2  217.08   12.50
   2  -8  -2  213.08   11.40
   8   2  -2  216.28   11.20
  -8  -2  -2  215.08   11.00
   2  -8  -2  214.28   13.50
  -8  -2   2  214.58   12.30
   2  -8   2  222.98   11.40
  -2   8   2  206.48   11.70
   8   2   2  212.18   11.40
   8   2   2  213.88   11.20
   8   1  -2  637.04   28.00
   8   1  -2  644.14   26.60
   1  -8  -2  631.94   26.70
   1  -8  -2  640.64   28.80
  -8  -1  -2  615.64   26.10
   8   1   2  621.94   26.30
   8   1   2  594.24   26.60
  -1   8   2  602.64   27.00
   1  -8   2  598.04   26.50
  -8  -1   2  612.64   27.50
   8   0  -2   73.79    7.20
   8   0  -2   78.89    6.10
  -8   0  -2   57.49    4.80
   0  -8  -2   88.09    8.70
   8   0   2   65.79    5.30
   0  -8   2   66.59    6.30
   0  -8   2   59.69    6.90
   8   0   2   57.69    5.40
  -8   0   2   68.39    6.30
   8  -1  -2   37.80    5.10
   8  -1  -2   25.70    4.40
  -8   1  -2   29.70    3.70
   8  -1   2   29.40    3.90
  -1  -8   2   27.80    4.70
   8  -1   2   30.60    4.20
  -8   1   2   36.00    4.80
   8  -2  -2   18.10    3.70
  -2  -8  -2    6.60    4.80
   8  -2  -2   13.20    3.50
  -8   2  -2   16.00    2.60
  -2  -8  -2   17.10    3.30
   8  -2   2   18.70    3.30
  -8   2   2   12.70    3.20
   2   8   2   15.30    3.80
   8  -2   2   17.00    2.70
  -3  -8  -2  113.99    8.60
  -3  -8  -2  122.39    7.90
  -3  -8  -2  102.49   10.20
   8  -3  -2  100.99    8.40
  -8   3  -2  104.39    6.50
   8  -3  -2   98.39    7.90
  -8   3   2  107.79    7.80
   8  -3   2  112.69    7.30
   8  -3   2  109.19    6.40
  -8   4  -2  142.49    8.60
  -4  -8  -2  164.48   12.50
   8  -4  -2  161.08   10.30
   8  -4  -2  176.68   10.80
  -4  -8  -2  180.68   11.10
   4   8  -2  154.78    7.50
  -4  -8  -2  156.88    9.70
  -8   4   2  162.68    9.80
  -4  -8   2  150.78   10.30
   8  -4   2  157.48    8.00
   8  -4   2  157.88    9.10
   5   8  -2    0.10    1.50
   8  -5  -2    1.00    2.50
   8  -5  -2    1.40    3.10
  -8   5  -2   -2.20    1.80
   5   8  -2    0.40    2.50
  -5  -8  -2   -8.50    4.40
  -5  -8  -2   -0.40    2.40
  -5  -8   2    3.90    3.10
   8  -5   2    2.40    1.60
   8  -5   2   -0.70    2.20
  -8   5   2    1.20    2.40
   6   8  -2   46.00    7.30
   8  -6  -2   41.60    6.20
  -8   6  -2   39.40    4.70
   6   8  -2   29.50    3.80
   8  -6   2   33.60    3.70
   8  -6   2   39.00    5.20
  -8   6   2   35.50    4.90
   6   8   2   59.89    6.30
  -6  -8   2   53.09    7.30
  -8   7  -2   36.80    5.00
   8  -7  -2   38.00    6.50
   7   8  -2   51.29    4.80
   8  -7  -2   38.60    5.70
  -7  -8  -2   47.20    6.80
   7   8   2   34.20    5.50
   8  -7   2   32.50    4.90
   8  -7   2   38.40    3.90
  -8   7   2   35.60    5.20
  -7  -8   2   46.90    7.00
   7   8   2   38.90    5.70
   8  -8  -2  208.48   12.70
  -8   8  -2  204.38   11.20
   8   8  -2  184.78   10.20
   8  -8  -2  185.08   13.00
  -8  -8  -2  180.78   12.20
   8   8   2  184.88   12.00
   8  -8   2  195.58    9.80
   8   8   2  189.38   11.60
  -8  -8   2  219.18   13.70
   8  -8   2  220.98   11.50
  -8   8   2  202.08   12.10
   8  -9  -2   16.30    5.60
   9   8  -2   15.90    3.40
   9   8   2   11.50    4.00
   9   8   2    9.30    3.70
  -9  -8   2    8.30    4.30
   8  -9   2    8.70    3.40
   8  -9   2   12.90    2.80
  -8   9   2    7.10    4.00
   7  -9  -2  252.17   14.20
  -9  -7  -2  243.48   14.30
   7  -9  -2  249.08   15.40
   9   7  -2  241.58   12.40
  -7   9  -2  238.68   13.20
  -9  -7   2  242.48   15.10
   7  -9   2  236.38   13.00
   7  -9   2  259.27   11.60
  -7   9   2  258.37   14.10
   9   7   2  249.38   13.50
   9   7   2  233.18   13.90
   9   6  -2  278.47   13.60
  -6   9  -2  260.47   14.20
   6  -9  -2  270.27   14.80
   6  -9  -2  282.87   16.50
   9   6  -2  290.37   18.00
  -9  -6  -2  255.67   14.60
  -9  -6   2  272.97   15.90
   9   6   2  260.17   14.70
   6  -9   2  270.17   13.80
  -6   9   2  268.47   14.70
   6  -9   2  262.47   12.20
   9   6   2  272.27   14.30
   9   5  -2  494.45   19.80
  -5   9  -2  408.96   20.10
   9   5  -2  423.76   21.80
   5  -9  -2  456.75   20.70
  -9  -5  -2  402.66   20.20
  -5   9   2  461.65   20.70
   5  -9   2  406.66   19.50
   5  -9   2  404.76   17.70
   9   5   2  417.76   20.50
   9   5   2  399.16   19.90
  -9  -5   2  420.16   21.60
  -4   9  -2  361.76   17.60
   9   4  -2  388.36   17.10
   9   4  -2  391.46   19.40
  -9  -4  -2  370.66   17.80
   4  -9  -2  348.77   17.70
   4  -9  -2  365.46   19.30
   9   4   2  349.57   17.90
  -4   9   2  349.47   17.90
  -9  -4   2  383.56   19.30
   4  -9   2  358.46   15.10
   4  -9   2  355.66   17.20
   9   4   2  362.46   17.40
   9   3  -2   57.49    5.50
  -9  -3  -2   50.19    5.20
   9   3  -2   47.90    6.30
  -9  -3   2   50.09    6.70
   9   3   2   58.39    5.50
   3  -9   2   44.10    6.10
   9   3   2   48.10    5.50
   2  -9  -2   -3.00    3.60
   2  -9  -2    2.30    2.20
   9   2  -2   10.80    3.30
  -9  -2  -2    4.30    2.20
   9   2   2    9.70    2.80
   9   2   2    4.90    2.60
  -9  -2   2    3.60    2.70
  -2   9   2    1.30    2.60
   9   1  -2  164.48   11.30
   9   1  -2  177.68   10.00
   1  -9  -2  207.68   12.90
  -9  -1  -2  166.88    9.50
   1  -9  -2  176.18   10.10
   9   1   2  167.98    9.60
   9   1   2  165.28   10.00
   1  -9   2  158.98   10.30
  -9  -1   2  172.98   10.80
  -1   9   2  169.78   10.70
   0  -9  -2  195.48   11.30
  -9   0  -2  199.48   10.50
   9   0  -2  203.38   11.30
   0  -9  -2  194.58   13.60
   9   0  -2  206.18   12.50
   0   9   2  204.18   12.00
   0  -9   2  206.58   11.90
   9   0   2  204.68   11.20
  -9   0   2  210.98   11.90
   0  -9   2  204.98   11.80
   9   0   2  185.48   10.40
  -1  -9  -2  652.13   27.80
   9  -1  -2  642.64   28.00
   9  -1  -2  642.14   29.10
  -9   1  -2  635.04   26.90
  -1  -9  -2  624.04   30.00
   9  -1   2  626.44   26.90
  -9   1   2  651.53   28.60
   9  -1   2  628.14   27.70
   1   9   2  650.93   28.80
  -1  -9   2  643.24   28.50
  -1  -9   2  641.54   28.40
  -2  -9  -2   80.29    7.60
   9  -2  -2   57.69    6.40
  -2  -9  -2   76.59    6.50
   9  -2  -2   67.09    6.90
  -9   2  -2   65.99    5.40
  -2  -9  -2   63.39    8.60
   9  -2   2   66.79    6.00
  -2  -9   2   85.59    7.40
   9  -2   2   62.99    5.30
  -2  -9   2   91.69    9.10
  -9   3  -2   41.80    4.40
  -3  -9  -2   49.40    7.10
  -3  -9  -2   40.60    7.00
  -3  -9  -2   44.80    6.10
   9  -3  -2   44.60    6.20
   9  -3  -2   46.70    6.00
   9  -3   2   38.60    5.10
  -9   3   2   43.30    5.40
  -3  -9   2   53.69    7.10
   9  -3   2   48.20    4.40
  -4  -9  -2   34.00    6.40
   9  -4  -2   32.60    5.00
  -9   4  -2   24.60    3.50
  -4  -9  -2   31.80    6.90
   9  -4  -2   25.40    4.90
  -9   4   2   25.60    4.30
   9  -4   2   29.70    4.40
  -4  -9   2   23.80    4.90
   9  -4   2   25.90    3.50
  -5  -9  -2  606.64   27.60
   9  -5  -2  570.94   27.10
   5   9  -2  507.35   24.00
  -9   5  -2  600.34   25.50
   9  -5  -2  601.34   27.90
  -5  -9  -2  603.64   29.80
  -9   5   2  604.74   26.80
   9  -5   2  615.44   26.30
  -5  -9   2  613.84   28.10
   9  -5   2  622.94   24.60
  -6  -9  -2   48.70    6.80
   9  -6  -2   60.29    7.30
  -9   6  -2   44.30    5.30
   9  -6  -2   71.19    8.60
   9  -6   2   49.99    6.30
   9  -6   2   60.19    4.60
   6   9   2   54.39    6.80
  -9   6   2   60.29    6.40
   9  -7  -2  149.88   10.90
  -7  -9  -2  135.09   10.70
   9  -7  -2  143.09   10.40
  -9   7  -2  124.09    8.40
   7   9  -2  108.19    7.30
  -9   7   2  143.29    9.70
  -7  -9   2  137.69   11.60
   9  -7   2  124.99    7.30
   9  -7   2  123.39    9.00
   7   9   2  137.09    9.70
   8   9  -2  329.17   16.10
   9  -8  -2  342.87   19.40
   9  -8  -2  373.66   21.50
  -8  -9  -2  387.56   25.50
  -9   8   2  375.46   18.70
  -8  -9   2  350.36   20.00
   9  -8   2  345.57   17.70
   9  -8   2  353.36   16.00
   8   9   2  402.86   18.60
   8   9   2  349.07   18.40
   9   9  -2    1.50    2.60
   9  -9  -2    6.00    4.30
  -9   9   2    0.60    2.90
  -9  -9   2    1.10    3.40
   9  -9   2    0.80    2.20
   9   9   2    5.60    3.40
   9 -10  -2   -0.40    4.20
  10   9  -2   10.20    3.10
 -10  -9   2    6.80    4.10
  -9  10   2    3.90    3.60
  10   9   2    8.00    3.80
   9 -10   2    5.10    2.70
   8 -10  -2  153.88   12.70
  10   8  -2  155.38    9.60
  10   8   2  153.18   10.50
  -8  10   2  151.08   11.00
   8 -10   2  168.08    9.00
 -10  -8   2  159.68   12.50
   7 -10  -2    6.10    4.90
  10   7  -2    4.90    3.10
   7 -10   2   -0.70    2.60
   7 -10   2    5.70    2.40
 -10  -7   2    5.00    3.90
  10   7   2    3.70    3.40
  10   7   2    3.70    3.10
  -7  10   2    8.80    3.70
   6 -10  -2   45.00    7.40
 -10  -6  -2   43.90    6.20
  10   6  -2   45.30    5.50
  -6  10  -2   46.90    6.10
   6 -10   2   52.69    4.60
  -6  10   2   44.80    6.40
 -10  -6   2   55.69    7.70
  10   6   2   46.10    6.40
  10   6   2   48.10    6.20
   6 -10   2   42.80    5.80
   5 -10  -2   39.40    6.20
   5 -10  -2   27.60    6.30
 -10  -5  -2   28.20    4.90
  10   5  -2   35.50    4.80
  -5  10  -2   31.50    5.10
  10   5  -2   39.40    8.30
   5 -10   2   26.70    4.30
  10   5   2   24.50    4.70
  10   5   2   30.10    5.20
  -5  10   2   35.10    5.60
 -10  -5   2   38.80    6.20
  -4  10  -2  149.79    9.80
   4 -10  -2  147.69    9.90
  10   4  -2  155.18   11.30
  10   4  -2  139.09    9.10
   4 -10  -2  151.98   11.80
 -10  -4  -2  139.89    9.50
  10   4   2  151.88   10.30
   4 -10   2  142.69    9.40
 -10  -4   2  139.99   11.40
  10   4   2  144.59    9.40
  -4  10   2  144.19   10.30
  10   3  -2   27.30    4.30
  10   3  -2   19.10    4.80
   3 -10  -2   40.60    5.80
 -10  -3  -2   25.50    4.40
  10   3   2   25.80    4.20
  10   3   2   21.90    4.40
   3 -10   2   26.70    4.70
 -10  -3   2   24.70    5.20
   2 -10  -2  448.76   21.60
 -10  -2  -2  463.35   21.30
  10   2  -2  470.65   21.30
   2 -10  -2  507.75   24.40
 -10  -2   2  492.05   23.00
  -2  10   2  435.86   22.10
  10   2   2  455.25   21.00
  10   2   2  443.76   21.90
   2 -10   2  482.95   21.70
  10   1  -2    6.10    3.10
  10   1  -2    7.50    3.80
 -10  -1  -2    5.10    2.60
   1 -10  -2   10.40    3.20
  10   1   2   11.20    3.40
  10   1   2    9.40    3.00
   1 -10   2    7.40    3.50
 -10  -1   2    7.70    3.50
  -1  10   2   21.60    4.20
  10   0  -2   68.19    6.50
  10   0  -2   77.19    7.90
 -10   0  -2   56.19    5.60
 -10   0   2   60.19    6.80
  10   0   2   61.29    5.60
  10   0   2   59.09    6.40
   0 -10   2   61.09    7.60
   0 -10   2   53.59    7.10
  10  -1  -2  120.99    9.70
  10  -1  -2   98.69    8.20
 -10   1  -2   98.09    7.00
  10  -1   2   96.69    6.90
 -10   1   2  110.39    8.70
  10  -1   2   96.39    7.90
  -2 -10  -2  145.99   10.80
  -2 -10  -2  111.79   12.00
  10  -2  -2  131.09   10.30
  10  -2  -2  114.59    9.40
 -10   2  -2  143.19    8.40
  -2 -10   2  144.49   12.00
  10  -2   2  141.79    9.30
  10  -2   2  148.79    8.20
 -10   2   2  131.99    9.80
  -2 -10   2  139.29   10.50
 -10   3  -2  587.44   25.40
  10  -3  -2  614.14   28.20
  -3 -10  -2  608.04   29.60
  10  -3  -2  593.54   27.10
  -3 -10  -2  588.94   27.50
 -10   3   2  605.94   27.20
  -3 -10   2  582.74   27.40
  -3 -10   2  594.94   28.10
  10  -3   2  592.14   25.10
  10  -3   2  590.64   26.60
  10  -4  -2   57.79    8.30
 -10   4  -2   65.39    5.90
  -4 -10  -2   82.59    9.70
  10  -4  -2   76.49    7.80
  -4 -10  -2   78.49   10.20
  10  -4   2   71.69    5.30
 -10   4   2   67.89    7.10
  -4 -10   2   74.89    8.50
  10  -4   2   66.69    6.90
 -10   5  -2   43.80    5.20
  -5 -10  -2   54.99    9.10
  10  -5  -2   43.50    6.40
  -5 -10  -2   45.70    6.50
  10  -5  -2   50.19    7.10
  -5 -10   2   30.10    5.70
  10  -5   2   42.40    4.30
 -10   5   2   45.50    6.10
  10  -5   2   37.70    5.50
  10  -6  -2   48.00    6.80
   6  10  -2   27.60    3.30
 -10   6  -2   33.40    4.90
  10  -6  -2   37.20    6.50
  -6 -10  -2   60.09    7.90
 -10   6   2   42.00    6.10
   6  10   2   40.30    6.00
  10  -6   2   32.80    4.10
  10  -6   2   36.00    5.30
  10  -7  -2  286.27   18.40
   7  10  -2  240.18   12.90
  10  -7  -2  271.27   16.50
 -10   7   2  296.47   15.90
   7  10   2  340.87   16.00
  -7 -10   2  290.67   17.50
  10  -7   2  284.87   15.30
  10  -7   2  267.67   13.20
  10  -8  -2    0.00    4.10
   8  10  -2    1.90    2.40
   8  10   2    2.60    3.40
 -10   8   2    3.20    3.10
  10  -8   2   -0.40    2.10
  -8 -10   2    4.80    4.40
  10  -9  -2  199.28   13.80
   9  10  -2  176.78   10.20
 -10   9   2  197.98   12.60
   9  10   2  202.88   12.10
  -9 -10   2  187.08   13.90
  10  -9   2  187.58   10.20
  10  10  -2   10.70    3.10
  10 -10  -2   12.10    5.40
 -10  10   2    8.60    4.10
 -10 -10   2   13.80    4.90
  10  10   2   10.40    4.40
  10 -10   2   11.30    3.20
  10 -11  -2    7.90    5.60
  11  10  -2    5.30    3.40
  10 -11   2    9.40    3.30
 -11 -10   2    8.40    4.50
  11  10   2    7.50    4.10
 -10  11   2   10.40    4.10
   9 -11  -2   -0.50    4.50
  11   9  -2    3.50    3.10
   9 -11   2    1.70    2.60
  11   9   2    5.10    3.30
 -11  -9   2    3.60    3.60
  -9  11   2   -0.10    3.20
  11   8  -2    0.30    3.00
   8 -11  -2    5.20    4.70
 -11  -8   2    0.30    3.50
  11   8   2    2.60    3.30
   8 -11   2    3.10    2.60
  -8  11   2   -0.50    2.80
  11   7  -2   98.89    7.40
   7 -11  -2   64.99    9.30
  -7  11   2   78.09    8.30
 -11  -7   2  100.49    9.90
  11   7   2   86.19    7.70
   7 -11   2   84.69    6.20
  11   6  -2  323.67   16.20
   6 -11  -2  312.97   18.90
   6 -11   2  329.27   14.80
  11   6   2  325.17   16.80
  -6  11   2  329.47   17.60
 -11  -6   2  309.87   18.70
  11   5  -2  173.68   10.30
   5 -11  -2  157.08   13.20
 -11  -5   2  174.08   13.10
  11   5   2  174.18   11.80
  11   5   2  166.38   10.80
  -5  11   2  160.98   11.60
   5 -11   2  149.79   10.50
 -11  -4  -2  428.26   20.70
  -4  11  -2  417.06   20.60
  11   4  -2  416.56   19.70
   4 -11  -2  402.26   22.10
  -4  11   2  412.86   20.90
 -11  -4   2  429.16   22.10
  11   4   2  418.36   21.10
  11   4   2  418.66   19.80
   4 -11   2  406.36   19.90
  11   3  -2  275.47   16.50
  11   3  -2  264.77   14.20
 -11  -3  -2  255.67   14.40
   3 -11  -2  270.17   16.90
 -11  -3   2  275.57   16.00
  11   3   2  263.57   15.10
   3 -11   2  285.17   14.90
  11   3   2  275.87   14.10
  -3  11   2  271.97   15.50
  11   2  -2   44.30    6.70
 -11  -2  -2   55.49    6.00
   2 -11  -2   41.70    7.70
  11   2  -2   47.80    6.10
  -2  11   2   50.39    7.50
 -11  -2   2   49.60    6.90
  11   1  -2    6.70    3.40
  11   1  -2    9.30    4.00
   1 -11  -2    5.30    5.50
 -11  -1   2    5.00    3.30
   1 -11   2   10.40    3.80
  11   1   2   14.70    3.30
  11   1   2   14.40    3.60
  -1  11   2    9.40    3.90
 -11   0  -2  507.45   22.80
  11   0  -2  468.85   23.20
   0 -11  -2  494.85   25.80
  11   0  -2  498.45   25.10
 -11   0   2  512.25   24.60
   0  11   2  533.65   24.90
   0 -11   2  530.45   24.40
  11   0   2  503.55   23.80
  11   0   2  502.45   22.40
   0 -11   2  524.35   23.90
  11  -1  -2   39.70    6.80
 -11   1  -2   36.20    4.80
  11  -1  -2   25.60    5.00
  -1 -11  -2   38.70    7.50
  -1 -11  -2   54.29    7.80
  11  -1   2   30.20    4.20
   1  11   2   38.20    6.10
  11  -1   2   32.20    5.10
 -11   1   2   32.00    5.40
  -1 -11   2   59.69    8.50
  11  -2  -2   49.60    7.10
 -11   2  -2   45.90    5.10
  -2 -11  -2   43.60    8.00
  -2 -11  -2   64.69    8.20
  11  -2  -2   43.20    6.00
  -2 -11   2   54.29    7.30
  11  -2   2   51.39    6.30
  -2 -11   2   48.80    7.90
  11  -2   2   47.30    5.10
 -11   2   2   48.30    6.50
  -4 -11  -2  126.69   12.10
  11  -4  -2  116.89   10.00
  -4 -11  -2  129.99   12.80
  11  -4  -2  124.59   10.80
 -11   4  -2  128.39    8.50
  11  -4   2  122.09    9.50
 -11   4   2  122.49    9.80
  -4 -11   2  158.78   11.30
  -4 -11   2  159.28   11.50
  11  -4   2  134.69    7.90
  -5 -11  -2  475.45   25.10
  11  -5  -2  444.16   23.30
  11  -5  -2  448.66   22.20
  -5 -11  -2  435.76   23.40
  11  -5   2  441.96   19.40
  11  -5   2  430.36   21.60
  -5 -11   2  429.06   22.80
 -11   5   2  445.36   21.80
  11  -6  -2  141.79   11.30
  -6 -11   2  169.88   12.60
 -11   6   2  143.99   10.50
   6  11   2  130.59   10.40
  11  -6   2  146.59    8.40
  11  -6   2  132.89   12.50
  11  -7  -2  354.06   19.50
  -7 -11   2  371.56   20.60
  11  -7   2  364.86   16.50
   7  11   2  340.47   18.40
 -11   7   2  370.56   19.00
   8  11  -2    2.50    2.40
  -8 -11   2    8.30    4.80
  11  -8   2    3.40    2.50
   8  11   2    6.00    3.60
 -11   8   2    4.90    3.20
   9  11  -2   58.19    5.70
  11  -9  -2   43.30    7.50
 -11   9   2   49.50    7.30
  11  -9   2   51.79    5.60
  -9 -11   2   61.89    8.90
   9  11   2   49.70    6.70
  11 -10  -2   15.80    5.80
  10  11  -2   20.60    3.80
 -11  10   2   19.70    4.90
  11 -10   2   19.30    3.80
 -10 -11   2   28.10    6.70
  10  11   2   28.20    5.60
  11  11  -2  196.68   11.20
  11 -11  -2  182.38   14.60
  11 -11   2  172.18   11.10
  11  11   2  166.38   12.10
 -11 -11   2  207.28   15.00
  12  11  -2   38.90    5.30
  11 -12   2   37.00    5.60
 -12 -11   2   32.50    7.80
  12  11   2   31.10    6.00
  12  10  -2   27.90    4.80
  10 -12  -2   38.30    7.70
 -12 -10   2   27.00    6.30
  10 -12   2   26.60    4.90
   9 -12  -2  206.38   15.20
  12   9  -2  202.98   11.80
  12   9   2  198.78   12.50
  -9  12   2  193.28   13.40
 -12  -9   2  203.38   14.70
  12   8  -2    3.40    3.20
   8 -12  -2    1.40    4.70
  -8  12   2   -3.20    3.00
  12   8   2   -0.70    3.10
 -12  -8   2    2.10    3.80
   8 -12   2   -0.70    4.10
   7 -12  -2   21.40    6.10
  12   7  -2   26.30    4.70
  -7  12   2   25.60    5.20
  12   7   2   26.50    5.00
 -12  -7   2   28.20    6.50
  12   6  -2   16.10    4.00
   6 -12  -2   15.70    5.90
  12   6   2   19.70    4.50
  -6  12   2   16.60    5.00
 -12  -6   2   21.80    6.00
   5 -12  -2   50.19    8.00
  12   5  -2   54.89    6.90
  12   5   2   47.30    6.20
  -5  12   2   46.10    6.70
 -12  -5   2   55.59    8.20
   4 -12  -2   -4.20    4.10
  12   4  -2    2.80    3.20
  12   4   2   -3.00    2.80
  -4  12   2    0.30    3.00
 -12  -4   2    2.70    3.40
   3 -12  -2  105.79   11.50
  12   3  -2  108.69    9.10
   3 -12   2  119.09   12.30
  12   3   2  111.29    8.50
 -12  -3   2  112.09   10.10
  12   3   2  117.19    9.90
  -3  12   2  119.19   10.00
  12   2  -2   19.10    5.00
   2 -12   2   31.80    5.50
  12   2   2   34.10    4.70
 -12  -2   2   31.20    5.80
  -2  12   2   32.80    6.00
  12   2   2   33.40    5.40
  12   1  -2  250.27   13.90
  12   1  -2  249.18   18.60
   1 -12  -2  246.18   16.50
  12   1   2  249.38   12.90
  12   1   2  254.07   14.50
   1 -12   2  243.18   14.20
  -1  12   2  233.48   15.50
 -12  -1   2  254.27   15.20
   1 -12   2  232.98   14.50
  12   0  -2   45.80    5.90
  12   0  -2   42.90    7.30
  12   0   2   53.39    6.70
   0 -12   2   45.70    6.70
  12   0   2   62.79    5.90
   0  12   2   68.89    9.50
 -12   0   2   39.80    6.20
   0 -12   2   42.70    6.60
  12  -1  -2  102.99   10.30
  -1 -12  -2   67.79    9.60
  12  -1  -2   70.19    7.80
 -12   1   2   69.39    8.30
   1  12   2   82.89    9.80
  -1 -12   2   92.39    9.50
  12  -1   2   81.29    7.80
  12  -1   2   76.09    6.40
  -2 -12  -2  371.96   23.10
  -2 -12  -2  438.86   22.30
  12  -2  -2  388.56   20.70
  12  -2  -2  405.66   23.70
  12  -2   2  400.66   20.90
  12  -2   2  404.56   19.00
  -2 -12   2  505.35   22.80
 -12   2   2  413.26   21.50
  -2 -12   2  488.35   23.20
  12  -3  -2    3.50    3.80
  12  -3  -2   -4.90    3.70
  -3 -12  -2   -0.90    3.80
  -3 -12   2    6.20    5.00
  12  -3   2   -2.10    2.20
 -12   3   2    0.10    2.90
  12  -3   2   -1.50    2.50
  -3 -12   2   -4.30    5.40
  -4 -12  -2   95.89   11.90
  12  -4  -2   88.29    9.40
  -4 -12   2  124.49   11.00
  12  -4   2   96.09    6.60
 -12   4   2   73.09    8.30
  -5 -12  -2   -2.20    6.20
  12  -5  -2   -5.10    3.60
  12  -5   2    3.60    2.30
 -12   5   2   -2.70    2.60
  -5 -12   2    2.40    3.50
  12  -6  -2  106.69   10.20
  -6 -12   2  110.49   10.80
 -12   6   2  109.89    9.30
   6  12   2  116.29    9.40
  12  -6   2  110.89    7.40
  12  -7  -2   48.80    7.80
  -7 -12   2   57.49    8.70
  12  -7   2   54.49    5.40
   7  12   2   52.99    7.20
 -12   7   2   50.59    7.10
  12  -8  -2  214.48   14.20
  -8 -12   2  205.38   14.90
  12  -8   2  183.88   10.50
 -12   8   2  171.78   12.30
   8  12   2  174.58   12.00
  12  -9  -2   80.29    9.90
  -9 -12   2   86.59   10.50
 -12   9   2   87.99   11.10
   9  12   2   84.09    8.30
  12  -9   2   76.39    7.00
  12 -10  -2    7.70    5.30
  12 -10   2    9.20    3.20
  10  12   2    9.60    4.30
 -10 -12   2   -3.40    4.00
  12 -11  -2    2.50    5.40
  11  12   2   11.50    4.70
  12 -11   2    5.00    3.70
 -11 -12   2    5.50    4.70
  12 -12  -2   -4.60    4.90
  12  12   2    0.60    3.50
  12 -12   2   -2.10    3.10
  12 -13  -2   95.89   12.50
  13  12   2  103.59    9.90
  13  11  -2   -1.00    3.50
  11 -13  -2    3.00    5.60
  13  11   2    0.50    3.50
  13  10  -2    2.00    3.40
  10 -13  -2   -0.10    5.10
  13  10   2   -4.60    3.50
   9 -13  -2    8.70    5.90
  13   9  -2   13.70    4.10
  13   9   2    2.40    3.50
 -13  -9   2    6.10    4.30
  13   8  -2    9.80    3.90
   8 -13  -2    0.10    5.20
  13   8   2   12.10    4.30
 -13  -8   2    5.70    4.30
  -8  13   2    8.70    4.50
  13   7  -2  286.67   14.90
   7 -13  -2  251.17   17.50
  -7  13   2  267.57   16.50
  13   7   2  275.97   15.20
 -13  -7   2  273.47   17.80
   6 -13  -2    4.70    5.80
  13   6   2   10.00    3.90
 -13  -6   2   13.30    5.00
  -6  13   2   13.70    4.80
   5 -13  -2  279.77   18.00
  13   5  -2  277.17   15.10
  13   5   2  285.57   15.20
  -5  13   2  270.27   16.50
 -13  -5   2  305.57   17.80
   4 -13  -2   -1.10    4.60
  13   4  -2    3.70    3.40
  -4  13   2    4.80    3.50
  13   4   2    2.20    2.90
 -13  -4   2    1.70    3.10
  13   3  -2    1.60    3.40
   3 -13  -2   -5.40    4.30
 -13  -3   2    0.00    2.90
  13   3   2   -2.30    2.60
  -3  13   2    3.40    3.70
   2 -13  -2   -1.30    4.50
  13   2  -2   -4.90    2.80
 -13  -2   2   -2.00    2.70
  -2  13   2    0.00    3.60
  13   2   2   -2.60    2.40
  13   1  -2  190.28   12.30
   1 -13  -2  211.78   15.10
 -13  -1   2  198.98   13.50
  13   1   2  195.98   11.40
   1 -13   2  191.98   13.20
  -1  13   2  213.88   14.50
  13   0  -2  108.49    9.40
   0 -13  -2  117.49   12.30
  13   0   2  113.49    8.00
 -13   0   2  114.99   10.00
   0  13   2  120.29   11.40
   0 -13   2  124.69   10.50
  13  -1  -2  188.98   12.50
  -1 -13  -2  198.28   15.00
 -13   1   2  201.68   13.40
  13  -1   2  210.28   11.20
  -1 -13   2  203.98   14.30
  -2 -13  -2   39.80    7.60
  13  -2  -2   12.70    4.30
  -2 -13   2   15.90    6.50
  13  -2   2   15.70    3.50
 -13   2   2    9.80    4.30
  13  -3  -2   22.70    5.00
  -3 -13  -2   28.80    7.80
  13  -3   2   24.30    3.90
 -13   3   2   19.60    4.70
  -3 -13   2   36.40    7.70
  13  -4  -2  273.57   16.00
  -4 -13  -2  278.37   19.00
  -4 -13   2  259.87   17.20
 -13   4   2  282.67   16.00
  13  -4   2  272.87   13.60
  -5 -13  -2  106.79   13.40
  13  -5  -2  103.29   10.00
  13  -5   2  108.69    7.60
  -5 -13   2  120.29   11.10
 -13   5   2  111.99    9.70
  13  -6  -2  353.86   20.40
  13  -6   2  381.86   17.70
  -6 -13   2  422.36   22.10
 -13   6   2  373.86   19.90
   6  13   2  362.16   19.20
  13  -7  -2   12.00    5.30
   7  13   2   10.20    4.50
 -13   7   2    5.70    3.60
  -7 -13   2    8.70    5.30
  13  -7   2   10.60    3.10
  13  -8  -2   -1.30    4.30
  -8 -13   2    6.90    4.30
   8  13   2    3.50    3.70
  13  -8   2    0.00    2.60
  13  -9  -2   42.50    7.50
  13  -9   2   47.10    6.00
   9  13   2   44.50    6.40
  -9 -13   2   40.80    8.60
  13 -10  -2  158.18   13.80
  10  13   2  189.08   12.60
 -10 -13   2  164.68   14.40
  13 -10   2  176.98   11.00
  13 -11  -2   18.50    6.50
  13 -11   2   22.60    4.80
  11  13   2   29.10    6.00
  13 -12  -2    7.70    6.00
  13 -12   2    6.90    4.20
  12  13   2    8.30    4.30
  13 -13  -2    3.80    6.10
  13  13   2   10.90    4.60
  13 -14  -2   41.20    9.20
  14  13   2   38.40    6.90
  12 -14  -2   -3.20    5.70
  14  12   2    0.10    3.70
  14  11  -2    0.60    3.90
  11 -14  -2    1.40    5.50
  14  11   2    1.50    3.90
  10 -14  -2   72.59   10.70
  14  10  -2   63.49    7.90
  14  10   2   59.89    8.20
   9 -14  -2   -2.50    5.40
  14   9  -2    0.40    3.40
  14   9   2   -4.40    3.60
  14   8  -2   32.30    5.50
   8 -14  -2   35.80    8.20
  14   8   2   30.50    5.60
   7 -14  -2    2.80    5.40
  14   7  -2    1.40    3.20
 -14  -7   2    7.20    4.60
  14   7   2    1.60    3.50
   6 -14  -2    6.70    5.50
 -14  -6   2    7.80    4.20
  14   6   2   20.90    4.40
  -6  14   2    6.10    4.20
  14   5  -2   54.19    7.00
   5 -14  -2   46.30    8.20
  -5  14   2   51.19    7.60
  14   5   2   44.80    6.20
 -14  -5   2   46.70    7.50
   4 -14  -2   92.19   11.00
  14   4  -2   98.49    8.50
 -14  -4   2   91.39    9.90
  14   4   2  101.09    8.30
  -4  14   2   91.79   10.20
   3 -14  -2  161.98   14.10
  14   3  -2  170.38   11.60
 -14  -3   2  158.18   12.80
  14   3   2  178.48   10.80
  -3  14   2  169.28   12.90
   2 -14  -2   42.80    8.30
  14   2  -2   48.40    6.30
  -2  14   2   47.80    8.20
 -14  -2   2   35.60    6.50
  14   2   2   44.10    5.60
  14   1  -2   10.00    4.10
   1 -14  -2   10.80    5.80
   1 -14   2   11.20    4.80
  14   1   2    8.90    3.10
  -1  14   2   10.00    5.10
 -14  -1   2    3.40    4.00
   0 -14  -2    0.00    4.90
  14   0  -2   -0.30    3.10
   0 -14   2   -4.20    3.00
  14   0   2    2.50    2.50
   0  14   2    4.10    3.90
 -14   0   2   -0.70    3.20
  -1 -14  -2  129.69   12.50
  14  -1  -2  121.89   10.10
  -1 -14   2  125.89   12.20
  14  -1   2  131.99    8.50
 -14   1   2  126.19   11.00
  14  -2  -2    1.10    3.50
  -2 -14  -2    2.30    6.10
 -14   2   2   -0.90    3.20
  14  -2   2    1.50    2.40
  -2 -14   2    4.30    5.40
  -3 -14  -2  189.98   16.10
  14  -3  -2  223.28   13.70
 -14   3   2  183.98   13.10
  14  -3   2  190.28   11.00
  14  -4  -2    1.10    4.10
  -4 -14  -2   37.10    8.90
  -4 -14   2    1.10    3.90
  14  -4   2    0.90    2.70
  -5 -14  -2    1.10    6.50
  14  -5  -2   14.80    4.80
 -14   5   2    2.00    3.70
  -5 -14   2    1.20    3.50
  14  -5   2   -3.50    2.80
  14  -6  -2   37.60    7.10
  14  -6   2   40.50    5.20
   6  14   2   60.19    7.40
  -6 -14   2   28.50    6.40
  14  -7  -2   76.79    9.60
  14  -7   2   68.09    6.60
  -7 -14   2   61.99   10.10
   7  14   2   64.69    7.80
  14  -8  -2   37.60    7.20
  -8 -14   2   41.80    8.00
   8  14   2   39.50    6.90
  14  -8   2   44.60    5.60
  14  -9  -2    7.10    5.60
   9  14   2   10.00    4.40
  -9 -14   2   17.10    6.10
  14  -9   2   13.90    3.90
  14 -10  -2    9.10    5.80
  10  14   2   17.20    5.30
  14 -10   2   16.30    4.40
  14 -11  -2   36.60    8.00
  14 -11   2   36.50    6.00
  11  14   2   39.90    6.80
  14 -12  -2   93.19   12.20
  14 -12   2   93.49   10.80
  12  14   2   88.39    9.30
  14 -13  -2   68.89   10.80
  13  14   2   68.19    9.00
  14 -14  -2   21.00    8.00
  14  14   2   25.20    6.10
  14 -15  -2    3.00    6.40
  15  14   2   -2.60    4.10
  13 -15  -2   35.20    9.00
  15  13   2   39.10    6.90
  12 -15  -2   34.30    8.80
  15  12   2   36.40    6.50
  11 -15  -2   44.90    9.50
  15  11  -2   47.90    7.20
  15  11   2   62.19    7.80
  15  10  -2    8.10    4.40
  10 -15  -2    7.60    6.30
  15  10   2    8.60    4.40
   9 -15  -2    2.20    6.40
  15   9  -2    3.70    4.20
  15   9   2    2.90    3.80
  15   8  -2  158.38   11.70
   8 -15  -2  164.38   14.90
  15   8   2  168.48   11.50
   7 -15  -2   52.39    9.30
  15   7  -2   59.19    7.70
   6 -15  -2  108.19   12.70
  15   6  -2  110.49    9.50
  15   6   2  107.49    9.00
   5 -15  -2   -6.70    5.10
  15   5  -2    0.20    3.40
  -5  15   2   -3.00    3.70
  15   5   2   -3.40    2.80
   4 -15  -2    1.70    5.20
  15   4  -2   -3.70    3.10
  -4  15   2    0.60    3.90
  15   4   2    8.20    3.40
   3 -15  -2   -5.60    4.70
  15   3  -2   -3.70    3.30
  15   3   2    2.20    2.80
  -3  15   2   -1.40    3.60
   2 -15  -2   90.39   11.20
  15   2  -2  100.69    9.10
  15   2   2   89.59    7.60
  -2  15   2   81.29   10.70
   2 -15   2   70.49   10.00
 -15  -2   2   87.99   10.30
  15   1  -2   49.70    7.00
   1 -15  -2   55.39    9.20
 -15  -1   2   53.69    8.20
  15   1   2   43.30    5.70
  -1  15   2   56.89    8.60
   1 -15   2   76.39   10.20
   0 -15  -2    5.40    6.00
  15   0  -2    8.30    4.10
  15   0   2   12.40    3.50
   0 -15   2    5.60    5.40
 -15   0   2    9.40    4.90
  15  -1  -2   62.29    8.10
 -15   1   2   61.29   12.30
  15  -1   2   51.99    6.30
  -1 -15   2   78.69   11.20
  15  -2  -2    9.00    4.40
  -2 -15  -2    6.00    6.90
  15  -2   2    9.10    3.20
  -3 -15  -2  131.59   13.30
  15  -3  -2  110.79   10.20
  -3 -15   2  122.29   13.50
  15  -3   2  102.19    8.00
  15  -4  -2   24.50    6.00
  -4 -15  -2   24.30    8.10
  15  -4   2   26.20    4.40
  -4 -15   2   22.40    7.00
  15  -5  -2  649.14   31.20
  15  -5   2  662.73   28.40
  -5 -15   2  615.04   32.10
  15  -6  -2   43.90    7.50
  15  -6   2   39.70    5.30
  -6 -15   2   33.40    7.10
   6  15   2   41.80    6.90
  15  -7  -2   49.40    8.10
  -7 -15   2   68.09   10.00
  15  -7   2   39.70    5.60
   7  15   2   43.40    7.00
  15  -8  -2    5.30    5.40
   8  15   2   10.20    4.50
  15  -8   2    7.60    3.80
  -8 -15   2    8.30    5.00
  15  -9  -2  141.19   13.80
   9  15   2  160.58   11.90
  15  -9   2  162.98   11.00
  15 -10  -2   59.49   10.10
  10  15   2   68.79    9.20
  15 -10   2   69.89    7.90
  15 -11  -2   26.80    7.70
  15 -11   2   25.10    5.40
  11  15   2   30.00    6.40
  15 -12  -2   16.00    7.50
  12  15   2   13.80    5.30
  15 -13  -2   -3.50    5.90
  13  15   2   -0.60    4.10
  15 -14  -2   23.80    8.70
  14  15   2   26.10    6.30
  15 -15  -2   18.80    8.60
  15  15   2   -2.30    4.10
  15 -16  -2   50.09   11.30
  16  15   2   58.59    8.20
  14 -16  -2    1.60    6.70
  16  14   2    0.50    4.30
  13 -16  -2   -0.70    6.60
  16  13   2    2.60    4.10
  12 -16  -2    2.90    6.60
  16  12   2    1.80    3.70
  11 -16  -2   32.00    9.50
  16  11  -2   39.60    6.60
  16  11   2   49.90    7.10
  16  10  -2   17.70    5.20
  10 -16  -2   11.60    6.90
  16  10   2   12.50    4.80
  16   9  -2   64.59    8.70
   9 -16  -2   48.10    9.90
  16   9   2   59.29    8.10
   8 -16  -2    8.30    7.00
  16   8  -2   12.20    4.90
  16   8   2   19.10    4.90
   7 -16  -2   -4.90    5.50
  16   7  -2   -1.30    4.00
  16   7   2   24.90    5.00
   6 -16  -2   13.60    6.50
  16   6  -2    2.30    4.00
  16   6   2   -0.80    3.20
  16   5  -2   22.40    5.60
   5 -16  -2   26.90    7.80
  16   5   2   23.40    4.90
  16   4  -2   17.20    5.10
   4 -16  -2    4.90    6.40
  16   4   2   15.10    4.20
   3 -16  -2    9.00    6.30
  16   3  -2    6.30    4.60
  16   3   2   15.40    4.30
   2 -16  -2   -4.00    5.10
  16   2  -2   -0.60    3.50
  -2  16   2   -0.70    4.70
   2 -16   2    5.40    4.60
  16   2   2    3.40    3.20
   1 -16  -2   43.40    8.80
  16   1  -2   34.70    6.40
  16   1   2   41.50    5.70
   1 -16   2   36.70    7.30
  -1  16   2   42.90    8.10
  16   0  -2   75.39    9.20
   0 -16  -2   93.99   12.00
  16   0   2   89.29    7.60
   0 -16   2  102.99   12.50
  -1 -16  -2   85.39   11.80
  16  -1  -2   87.29    9.40
  16  -1   2   89.79    7.60
  -1 -16   2   91.59   12.50
  -2 -16  -2   89.19   12.50
  16  -2  -2   85.79    9.80
  -2 -16   2  129.29   15.80
  16  -2   2   99.29    8.00
  16  -3  -2   42.80    7.30
  -3 -16  -2   51.09   10.50
  16  -3   2   47.00    6.20
  16  -4  -2    0.80    4.70
  -4 -16  -2   11.80    7.60
  16  -4   2   17.80    4.00
  16  -5  -2    1.50    5.20
  -5 -16   2    4.50    4.50
  16  -5   2   -0.70    3.10
   5  16   2    3.20    4.20
  16  -6  -2   16.30    5.80
  16  -6   2   13.00    4.00
   6  16   2   23.60    5.50
  -6 -16   2    9.90    5.10
  16  -7  -2  142.99   13.50
   7  16   2  137.79   11.00
  16  -7   2  130.09   10.00
  16  -8  -2   26.80    7.30
   8  16   2   27.90    5.90
  16  -8   2   17.70    4.70
  16  -9  -2   74.69   10.60
   9  16   2   74.19    8.90
  16  -9   2   58.59    7.70
  16 -10  -2   27.50    8.00
  10  16   2   43.50    7.40
  16 -10   2   34.40    6.20
  16 -11  -2   13.50    7.30
  11  16   2   16.90    5.60
  16 -11   2   14.20    5.20
  16 -12  -2    4.50    6.60
  12  16   2   11.20    5.50
  16 -13  -2   26.50    8.50
  13  16   2   19.80    6.00
  16 -14  -2    1.70    6.80
  16 -15  -2   -8.00    5.80
  15  16   2   -3.40    4.10
  17  14   2    7.00    4.70
  13 -17  -2   55.09   11.70
  17  13   2   51.69    7.60
  12 -17  -2    7.70    7.20
  17  12   2    9.80    4.50
  11 -17  -2   23.80    8.70
  17  11  -2   24.50    6.00
  17  11   2   30.00    6.10
  17  10  -2    6.50    4.60
  10 -17  -2   -1.70    6.30
  17  10   2    4.00    4.00
  17   9  -2   36.90    7.00
   9 -17  -2   39.10    9.40
  17   9   2   44.10    6.90
   8 -17  -2   24.90    7.60
  17   8  -2   18.00    5.40
  17   8   2   16.50    4.90
  17   7  -2  290.57   17.20
   7 -17  -2  269.97   20.30
  17   7   2  297.97   16.50
   6 -17  -2    4.70    6.90
  17   6  -2    5.20    4.50
  17   6   2    1.00    3.70
  17   5  -2   19.40    5.40
   5 -17  -2   15.50    7.20
  17   5   2   17.30    4.70
   4 -17  -2   -2.10    6.10
  17   4  -2    4.30    4.40
  17   4   2    4.20    3.60
   3 -17  -2   96.69   13.20
  17   3  -2  105.89   10.10
   3 -17   2  112.99   12.10
  17   3   2  116.79    9.10
   2 -17  -2   26.30    8.10
  17   2  -2   29.50    6.20
  17   2   2   24.20    5.00
   2 -17   2   23.30    6.80
  17   1  -2   11.20    4.90
   1 -17  -2    6.10    6.60
  17   1   2    5.90    3.40
   1 -17   2    4.50    4.50
  17   0  -2   39.90    7.10
   0 -17  -2   48.10    9.90
   0 -17   2   42.10    8.80
  17   0   2   47.70    6.30
  17  -2  -2   14.20    6.40
  -2 -17  -2   42.80    9.70
  17  -2   2   29.30    5.00
  -2 -17   2   55.69   10.60
  -3 -17  -2   10.20    8.10
  17  -3  -2    6.90    5.10
  -3 -17   2    1.10    5.40
  17  -3   2    6.70    3.50
  17  -4  -2  156.68   13.20
  -4 -17  -2  139.49   15.60
  -4 -17   2  154.28   15.50
  17  -4   2  160.38   10.80
  17  -5  -2   29.90    7.20
  -5 -17   2   29.20    7.40
   5  17   2   24.60    6.00
  17  -5   2   26.90    5.20
  17  -6  -2    5.40    5.40
  -6 -17   2    9.00    7.20
   6  17   2    9.10    4.60
  17  -6   2   11.80    4.30
  17  -7  -2   11.90    6.00
   7  17   2   23.40    5.30
  17  -7   2    4.60    3.80
  17  -8  -2    9.20    6.00
  17  -8   2   13.40    4.40
   8  17   2    6.60    4.30
  17  -9  -2  125.29   13.90
   9  17   2  147.69   11.90
  17  -9   2  126.39   10.90
  17 -10  -2   -2.30    5.50
  17 -10   2    1.60    4.20
  10  17   2   -2.70    4.30
  17 -11  -2   22.60    8.20
  17 -11   2   29.40    6.50
  11  17   2   32.10    7.00
  17 -12  -2    1.50    6.30
  12  17   2    3.70    6.10
  17 -13  -2   34.20    9.20
  17 -14  -2    9.10    7.80
  18  13   2    7.20    4.80
  18  12   2    3.00    4.40
  18  11  -2   52.39    9.40
  18  11   2   51.89    7.80
  18  10  -2   25.50    6.40
  18  10   2   27.70    6.00
  18   9  -2   19.20    6.00
  18   9   2   27.10    5.80
  18   8  -2   15.70    5.40
  18   8   2    2.10    4.00
  18   7  -2   11.20    5.10
  18   7   2    6.60    4.50
  18   6  -2   13.30    5.50
  18   6   2   12.60    4.70
  18   5  -2  148.49   12.10
  18   5   2  141.59   10.90
  18   4  -2   17.80    5.70
  18   4   2   18.00    4.80
  18   3  -2   61.19    8.60
  18   3   2   69.69    7.70
  18   2  -2   -2.20    4.40
  18   2   2   -1.20    3.30
  18   1  -2   25.30    6.50
  18   1   2   36.40    5.50
  18   0  -2   -4.30    4.30
   0 -18   2   -4.40    6.30
  18   0   2    0.20    3.20
  18  -1  -2   25.60    6.60
  18  -1   2   33.10    5.40
  -1 -18   2   45.80   12.00
  18  -2  -2   34.50    7.30
  -2 -18   2   54.29   11.90
  18  -2   2   31.80    5.50
  18  -3  -2   -1.20    4.80
  18  -3   2    4.90    3.80
  -3 -18   2   17.40    6.90
  18  -4  -2  -11.70    4.90
  18  -4   2   -1.20    3.50
  -4 -18   2    7.30    5.50
  18  -5  -2    7.80    5.60
  18  -5   2    1.00    3.80
  18  -6  -2   44.00    8.60
  18  -6   2   61.69    8.20
  18  -7  -2    9.50    6.30
  18  -7   2   14.40    4.90
  18  -8  -2   10.20    7.00
  18  -8   2   25.80    5.90
  18  -9  -2    2.20    5.90
  18  -9   2   -0.20    4.10
  18 -10  -2    5.00    6.50
  18 -10   2    2.40    5.00
  18 -11  -2   76.79   12.00
  18 -11   2   82.99   10.50
  18 -12  -2   30.50    8.70
  18 -13  -2   49.00   10.70
  19  11   2   -3.30    4.20
  19  10  -2    1.00    5.00
  19  10   2    8.50    4.90
  19   9  -2   14.00    5.90
  19   9   2   13.40    5.40
  19   8  -2   72.29    9.40
  19   8   2   76.89    9.20
  19   7  -2   22.60    6.20
  19   7   2   18.90    5.40
  19   6  -2   11.50    5.30
  19   6   2    8.30    4.70
  19   5  -2    6.90    5.00
  19   5   2    0.60    4.10
  19   4  -2   11.70    5.70
  19   4   2   11.40    4.60
  19   3  -2   75.09   10.30
  19   3   2   94.19    8.90
  19   2  -2    5.40    5.30
  19   2   2    3.10    3.90
  19   1  -2   87.79   11.40
  19   1   2   92.99    8.90
  19   0  -2    1.70    4.80
  19   0   2    0.30    3.60
  19  -1  -2   44.20    8.20
  19  -1   2   41.30    6.40
  19  -2  -2    6.60    5.80
  19  -2   2    6.40    4.00
  19  -3  -2  150.88   13.80
  19  -3   2  170.38   11.80
  19  -4  -2   57.59    9.40
  19  -4   2   56.09    7.50
  19  -5  -2   24.50    7.50
  19  -5   2   19.60    5.40
  19  -6  -2    0.30    5.60
  19  -6   2    3.90    4.40
  19  -7  -2    5.60    5.80
  19  -7   2    2.40    4.50
  19  -8   2   72.99    9.60
  19  -9  -2   -3.50    5.80
  19  -9   2    1.70    4.40
  19 -10  -2    1.50    6.40
  19 -10   2   16.10    5.70
  19 -11  -2   16.60    7.00
  19 -11   2    4.50    5.20
  20  10  -2   47.20    8.40
  20  10   2   55.69    8.10
  20   9  -2   -2.20    4.60
  20   9   2    0.40    4.40
  20   8  -2    0.30    5.70
  20   8   2    9.90    5.00
  20   7  -2   17.30    6.20
  20   7   2   14.30    5.30
  20   6  -2   20.60    6.50
  20   6   2   22.20    5.90
  20   5  -2   12.70    6.10
  20   5   2   15.40    5.20
  20   4  -2   21.30    6.90
  20   4   2   31.60    6.10
  20   3  -2    5.40    5.30
  20   3   2   -2.60    3.80
  20   2  -2    7.80    5.60
  20   2   2    7.10    4.40
  20   1  -2   86.09   11.00
  20   1   2   79.89    8.80
  20   0  -2   54.49    8.90
  20   0   2   50.49    7.20
  20  -1  -2  102.79   12.10
  20  -1   2  100.79    9.90
  20  -2  -2   15.20    6.10
  20  -2   2    1.30    3.80
  20  -3  -2    1.10    5.50
  20  -3   2   -1.90    3.70
  20  -4  -2    5.70    6.00
  20  -4   2    5.80    4.40
  20  -5  -2   34.20    8.50
  20  -5   2   40.20    7.10
  20  -6  -2    1.00    5.90
  20  -6   2   -5.20    3.80
  20  -7  -2   17.30    7.70
  20  -7   2   23.20    6.10
  20  -8  -2    1.00    6.40
  20  -8   2   -0.60    4.10
  20  -9  -2   -9.70    5.60
  20  -9   2    3.30    5.00
  20 -10  -2   15.60    7.90
  20 -10   2   14.30    6.10
  21   7  -2    8.10    5.90
  21   7   2   10.30    5.20
  21   6  -2   11.10    6.30
  21   6   2   10.80    5.10
  21   5  -2   -7.20    5.00
  21   5   2    1.60    4.40
  21   4  -2   12.70    6.80
  21   4   2   18.80    5.70
  21   3  -2    0.10    5.60
  21   3   2    2.00    4.30
  21   2  -2   41.00    8.60
  21   2   2   40.90    7.20
  21   1  -2   21.80    7.10
  21   1   2   17.80    5.50
  21   0  -2   -0.30    5.50
  21   0   2   -1.80    4.50
  21  -1  -2   21.50    7.20
  21  -1   2   23.50    6.00
  21  -2  -2   31.70    8.30
  21  -2   2   34.40    7.00
  21  -3  -2   67.99   10.80
  21  -3   2   80.49   10.00
  21  -4  -2   16.00    7.40
  21  -4   2    5.60    5.00
  21  -5  -2    5.50    6.50
  21  -5   2   -1.40    4.30
  21  -6  -2   19.60    7.70
  21  -7  -2   27.70    8.90
  21  -7   2   30.90    7.10
  22   4  -2    4.60    6.10
  22   4   2    1.80    4.90
  22   3  -2    7.80    6.40
  22   3   2    4.80    4.70
  22   2  -2    1.00    5.70
  22   2   2    9.20    5.10
  22   1  -2    3.90    6.00
  22   1   2    4.60    4.70
  22   0  -2   49.20    9.70
  22   0   2   56.09    8.20
  22  -1  -2   13.20    7.10
  22  -1   2   14.70    5.40
  22  -2  -2   13.30    7.10
  22  -2   2   10.10    5.30
  22  -3  -2    5.20    6.60
  22  -3   2   -2.20    4.50
  22  -4  -2   26.40    8.40
  22  -4   2   23.50    6.50
   0   0  -3   -4.50    2.70
  -1   0  -3  467.15   23.60
   1   0  -3  503.85   23.30
   0   1  -3  583.14   23.70
   2   1  -3  334.67   16.20
  -2  -1  -3  336.27   18.00
   1  -2  -3  345.57   17.30
  -1   2  -3  350.16   16.80
  -2  -1   3  322.87   14.60
   0   2  -3   -2.20    2.60
  -2   0  -3   -2.00    3.40
  -2   0   3    4.20    1.40
   1   2  -3   94.79    7.20
  -2   1  -3   76.69    8.00
  -1  -2  -3  111.49    9.00
  -2   1   3   78.49    5.00
  -2  -2  -3 1182.28   49.40
   2  -2  -3 1181.68   46.30
   2   2  -3 1163.58   47.40
   2  -2  -3 1186.78   48.60
  -2   2  -3 1130.09   48.20
  -2  -2   3 1134.99   46.30
  -2   2   3 1210.18   46.20
   3   2  -3  365.36   17.20
  -2   3  -3  374.26   18.20
   2  -3  -3  387.56   18.90
   3   2  -3  401.06   16.80
  -3  -2  -3  351.66   19.60
   2  -3  -3  378.76   16.60
  -3  -2   3  360.16   16.60
  -2   3   3  377.86   16.30
   0   3  -3  286.87   14.60
   0  -3  -3  293.37   16.20
  -3   0  -3  353.66   16.80
   3   0  -3  315.07   15.00
   0   3   3  279.27   12.90
  -3   0   3  272.07   13.30
   3  -1  -3    4.10    2.90
  -1  -3  -3    3.50    4.00
   1   3  -3    9.50    3.00
  -3   1  -3    4.10    4.10
   3  -1  -3    3.00    1.80
  -3   1   3    0.10    1.80
   3  -2  -3   13.60    2.60
  -2  -3  -3   14.90    4.90
   2   3  -3   17.80    3.20
  -3   2  -3   21.70    4.50
  -2  -3   3   11.30    2.70
  -3   2   3   12.60    2.50
   3  -3  -3    9.30    2.50
   3  -3  -3   13.30    3.70
   3   3  -3   14.80    2.90
   4   3  -3  109.39    7.50
   4   3  -3  126.89    7.70
  -4  -3  -3  116.59   10.70
  -4  -3   3   99.59    7.40
   3  -4   3  121.79    6.40
   2  -4  -3 2138.79   81.49
   4   2  -3 2073.89   81.89
   2  -4  -3 2016.90   83.79
   4   2  -3 2042.50   82.09
  -4  -2  -3 2051.09   84.59
  -2   4  -3 2037.30   82.19
  -2   4   3 2046.00   81.19
  -4  -2   3 2275.67   82.19
   1  -4  -3  118.19    6.90
   1  -4  -3   86.79    9.50
  -1   4  -3  105.19    8.30
   4   1  -3  138.79    8.30
   4   1  -3  121.09    7.50
  -4  -1   3  121.69    7.40
  -1   4   3  103.69    6.70
   0  -4  -3   96.09    5.70
   4   0  -3  105.09    7.50
   4   0  -3  102.49    6.80
   0   4   3   82.09    6.00
  -4   1  -3   30.10    5.60
   4  -1  -3   33.50    4.40
   4  -1  -3   44.60    5.80
  -4   1   3   27.80    3.80
   4  -2  -3 1812.22   72.59
  -2  -4  -3 1879.81   75.59
   2   4  -3 1856.41   72.39
   4  -2  -3 1808.32   73.79
   2   4  -3 1829.52   71.69
  -2  -4   3 1878.51   72.39
   2   4   3 1824.22   71.89
  -4   2   3 1842.22   72.29
   4  -3  -3  115.39    7.70
  -3  -4  -3   89.69    9.90
   3   4  -3  119.79    7.50
   4  -3  -3  104.09    8.60
  -3  -4   3  148.99    8.00
   4  -3   3  107.29    6.60
   4  -4  -3  187.78   11.80
   4   4  -3  184.98   10.10
   4  -4  -3  199.28   10.60
  -4  -4  -3  194.88   13.40
   4   4  -3  179.68   10.20
  -4  -4   3  176.18   10.50
  -4   4   3  195.48    9.90
   4  -4   3  184.58    9.00
   5   4  -3    0.30    1.90
  -5  -4  -3   -0.30    4.40
   4  -5  -3   -3.20    3.00
   4  -5  -3    1.50    2.10
   5   4  -3   -0.90    2.00
  -5  -4   3    0.80    2.00
   4  -5   3   -1.10    1.30
   5   4   3   -1.10    1.20
  -4   5   3    1.50    1.90
   5   3  -3    9.50    2.70
  -5  -3  -3   11.00    5.10
   3  -5  -3    4.30    2.30
   3  -5  -3   14.00    4.20
  -5  -3   3   12.30    2.90
  -3   5   3    4.80    2.00
   3  -5   3    7.40    1.80
   5   2  -3   58.19    5.70
   2  -5  -3   56.09    7.20
   5   2  -3   51.29    5.50
  -5  -2  -3   45.70    7.90
   2  -5  -3   70.79    5.10
  -5  -2   3   58.39    5.60
   2  -5   3   46.50    3.70
  -2   5   3   56.69    4.80
   1  -5  -3   11.20    4.30
  -5  -1  -3    1.90    4.40
   5   1  -3    4.70    2.10
  -1   5  -3   -2.30    2.70
   5   1  -3    2.90    2.80
  -1   5   3    5.70    2.00
  -5  -1   3    3.10    2.20
   5   0  -3   81.69    6.90
   0   5  -3   91.09    6.70
   5   0  -3   67.59    7.10
   0  -5  -3  104.69    5.80
  -5   0   3   81.59    6.30
   0  -5   3  112.79    6.80
  -1  -5  -3    4.00    1.60
   1   5  -3   -0.40    2.50
  -1  -5  -3    4.90    2.20
  -1  -5  -3   -1.10    4.30
   5  -1  -3    4.90    2.40
  -5   1   3    2.60    2.10
  -1  -5   3   -1.30    2.00
   5  -1   3    5.70    2.40
   1   5   3    5.20    2.20
  -2  -5  -3   81.19    4.90
   2   5  -3   64.19    5.30
   5  -2  -3   56.19    6.60
   5  -2  -3   72.19    5.90
  -2  -5  -3   74.49    5.40
  -2  -5  -3   75.69    8.80
  -2  -5   3   59.99    5.80
  -5   2   3   65.79    5.50
   5  -2   3   72.79    5.40
   2   5   3   72.09    5.80
  -3  -5  -3    7.70    3.90
   3   5  -3    4.40    2.10
  -3  -5  -3    9.60    2.20
   5  -3  -3    2.40    3.20
  -3  -5   3    0.90    2.40
   5  -4  -3   98.29    9.10
  -4  -5  -3  125.29    7.30
   4   5  -3  146.59    8.30
  -4  -5  -3  103.69   10.60
   5  -4  -3  117.19    8.10
  -4  -5  -3  111.39    7.20
   5  -4   3  106.19    6.60
  -5   4   3  118.59    7.50
  -4  -5   3  148.89    8.70
  -5  -5  -3    7.70    2.40
   5   5  -3    8.50    2.90
  -5  -5  -3    5.30    5.40
   5  -5  -3    4.70    2.90
   5  -5  -3    0.70    3.40
  -5  -5   3   12.70    3.40
  -5   5   3    6.30    2.70
   5  -5   3    8.60    2.00
  -6  -5  -3    7.30    2.30
  -6  -5  -3   12.70    5.80
   5  -6  -3    5.10    4.10
   6   5  -3   10.30    3.10
   5  -6   3    4.30    2.00
  -5   6   3    3.90    2.40
  -6  -5   3    1.90    2.90
   6   5   3    4.90    2.20
   5  -6   3    5.00    1.70
   6   4  -3 1087.19   45.00
  -6  -4  -3 1078.99   48.60
   4  -6  -3 1102.09   47.30
  -4   6   3 1196.38   45.20
   4  -6   3 1090.99   43.00
   6   4   3 1055.69   44.50
  -6  -4   3 1097.69   45.90
   6   3  -3  120.79    8.50
   3  -6  -3  126.29    8.00
   3  -6  -3  100.39   10.20
   6   3  -3  119.49    8.20
  -6  -3  -3  112.19   11.30
  -3   6   3  115.09    7.60
  -6  -3   3  120.49    8.40
   3  -6   3  117.99    5.80
   6   2  -3   21.80    3.80
   2  -6  -3   25.20    3.50
   2  -6  -3   16.50    5.00
   6   2  -3   22.60    4.20
  -6  -2   3   24.20    4.00
   2  -6   3   23.80    3.40
  -2   6   3   21.40    3.50
   6   2   3   20.80    4.00
   2  -6   3   18.80    2.30
   6   1  -3   20.00    3.70
   1  -6  -3   13.00    4.90
   1  -6  -3   19.30    3.00
   1  -6   3   16.50    3.10
  -6  -1   3   17.90    3.30
   1  -6   3   15.80    3.00
   6   1   3   16.10    3.50
  -1   6   3   18.70    3.10
   0  -6  -3  424.96   17.90
   0   6  -3  381.46   17.50
   6   0  -3  417.46   19.10
   0  -6  -3  387.46   21.10
   6   0  -3  398.96   19.30
  -6   0   3  417.26   18.80
   0  -6   3  407.26   18.00
   0   6   3  407.96   18.40
   6   0   3  400.36   18.40
   0  -6   3  405.76   18.20
  -1  -6  -3  122.19   10.90
  -1  -6  -3  129.39    7.20
   6  -1  -3  133.79    8.60
  -1  -6  -3  124.19    7.90
   6  -1  -3  116.39    8.80
   1   6   3  124.19    8.00
   6  -1   3  123.69    7.70
  -6   1   3  123.79    8.00
  -1  -6   3  116.49    7.90
  -2  -6  -3    0.80    1.70
   6  -2  -3   -0.30    1.90
  -2  -6  -3    2.70    4.20
  -2  -6  -3    0.60    2.00
   6  -2  -3    0.10    2.90
   6  -2   3    1.60    1.90
  -6   2   3   -0.50    1.80
   2   6   3    2.40    2.40
  -2  -6   3    8.00    2.60
  -3  -6  -3    1.80    2.20
   6  -3  -3   -0.50    3.10
   6  -3  -3   -0.70    2.00
   3   6  -3   -1.40    1.60
  -3  -6  -3   -4.70    3.70
  -3  -6   3   -1.70    2.10
  -6   3   3   -1.60    1.60
   6  -3   3    1.00    1.80
  -4  -6  -3   38.40    7.50
  -4  -6  -3   49.30    5.10
   6  -4  -3   36.40    5.40
   6  -4  -3   46.60    6.70
   4   6  -3   42.20    4.60
   6  -4   3   44.00    4.40
  -6   4   3   37.40    4.90
  -4  -6   3   55.79    6.20
   6  -5  -3    6.00    4.50
  -5  -6  -3   -0.70    5.90
  -5  -6  -3   11.00    3.00
   6  -5   3    3.30    2.10
  -5  -6   3   11.00    3.30
  -6   5   3    4.70    2.50
  -6  -6  -3  594.74   26.80
   6   6  -3  603.34   26.40
   6  -6  -3  600.04   29.00
  -6  -6  -3  629.14   31.50
   6  -6   3  611.64   25.00
  -6   6   3  638.14   27.20
  -6  -6   3  649.74   28.40
   6  -6   3  599.84   25.60
   7   6  -3    4.00    3.00
   6  -7  -3    8.20    4.90
  -7  -6  -3    3.90    2.40
   6  -7   3    1.20    2.10
  -7  -6   3    5.40    3.30
  -6   7   3    4.90    3.00
   7   6   3    6.00    3.70
   7   6   3    3.60    2.50
   6  -7   3    3.60    1.60
  -7  -5  -3    3.70    2.30
   5  -7  -3   -1.90    4.40
   7   5  -3    8.50    3.30
   7   5   3    4.00    2.40
   5  -7   3    2.00    2.20
  -7  -5   3    1.70    3.20
  -5   7   3    3.10    2.70
   5  -7   3    6.10    1.60
   7   5   3    4.80    3.50
   4  -7  -3  148.69   11.60
  -7  -4  -3  116.39    7.40
   4  -7   3  123.69    7.20
   7   4   3  117.89    8.90
  -7  -4   3  122.49    9.20
   4  -7   3  119.49    5.70
   7   4   3  107.69    7.60
   3  -7  -3   33.20    6.50
   3  -7   3   38.60    4.50
   3  -7   3   36.60    2.60
   7   3   3   36.80    4.50
  -3   7   3   35.20    4.80
   7   3   3   36.20    5.00
   7   2  -3  129.29    9.10
   2  -7  -3  125.19   11.10
   2  -7   3  132.09    7.90
  -2   7   3  120.59    8.50
   7   2   3  142.29    8.00
  -7  -2   3  136.39    9.00
   7   2   3  122.39    8.60
   7   1  -3    7.60    2.80
   7   1  -3   14.70    3.80
   1  -7  -3    8.20    4.90
  -1   7   3    7.50    3.10
   1  -7   3   13.30    3.20
   7   1   3   10.80    3.30
   1  -7   3   15.00    3.20
   0  -7  -3   81.59   10.10
   7   0  -3   66.39    6.70
   7   0  -3   50.49    6.30
   0   7   3   69.29    6.50
   7   0   3   61.89    6.10
  -7   0   3   68.89    6.10
   7  -1  -3   -6.60    2.90
  -1  -7  -3    2.80    2.70
   7  -1  -3    1.30    2.70
  -1  -7  -3   -2.90    4.80
  -7   1   3    1.70    2.20
   1   7   3    3.30    2.70
  -1  -7   3    4.70    2.80
   7  -2  -3    0.20    2.30
  -2  -7  -3   -0.90    2.60
   7  -2  -3    2.80    3.40
  -2  -7  -3   -1.60    4.60
   7  -2   3    4.40    2.60
   2   7   3   -1.40    3.00
  -2  -7   3    0.10    2.30
  -7   2   3    0.50    2.10
   7  -3  -3    7.10    3.70
  -3  -7  -3    2.40    3.00
  -3  -7  -3   -4.60    4.30
   3   7  -3    2.40    2.00
   7  -3   3    3.20    2.20
  -3  -7   3    2.30    2.70
  -7   3   3    4.10    2.30
   7  -4  -3   19.00    5.00
   7  -4   3   18.00    3.20
  -4  -7   3   21.80    4.30
  -7   4   3   16.70    3.80
  -5  -7  -3    3.90    2.60
   7  -5  -3   -2.80    4.70
  -5  -7  -3   -3.00    5.40
   5   7  -3    2.10    2.50
   7  -5   3   -2.60    1.90
   7  -5   3    0.50    1.90
  -7   5   3   -2.10    2.40
  -6  -7  -3   12.30    6.70
  -6  -7  -3   20.30    4.00
   7  -6  -3    8.60    5.00
   6   7  -3    2.50    3.40
   7  -6   3    8.80    2.60
   7  -6   3    8.70    2.10
  -7   6   3    5.80    3.10
  -6  -7   3    8.40    3.70
  -7  -7  -3    4.70    2.80
   7   7  -3    3.00    2.70
   7  -7   3   -0.40    1.70
   7   7   3   -1.00    3.50
  -7  -7   3   -3.10    3.00
   7  -8  -3   31.50    6.90
   8   7  -3   26.70    4.70
   7  -8   3   21.00    4.00
   8   7   3   26.60    5.40
   8   7   3   29.20    4.90
   7  -8   3   28.50    3.40
  -7   8   3   46.80    6.00
  -8  -6  -3 1032.90   42.90
   6  -8  -3 1026.10   45.50
   8   6  -3  965.70   42.60
   8   6   3 1022.70   43.10
   8   6   3 1046.50   43.60
  -8  -6   3 1011.80   44.40
   6  -8   3 1036.10   42.00
  -6   8   3 1069.89   43.50
   6  -8   3 1037.10   40.30
  -8  -5  -3  168.78    9.70
   8   5  -3  168.28   10.50
   5  -8  -3  142.09   12.80
  -5   8   3  177.28   10.60
   5  -8   3  155.68    9.30
   8   5   3  149.39    9.60
   8   5   3  154.58   10.50
  -8  -5   3  156.98   11.40
   5  -8   3  162.48    7.30
  -8  -4  -3 1438.36   59.29
   8   4  -3 1453.25   60.19
   4  -8  -3 1528.05   62.89
   8   4   3 1406.76   59.69
  -8  -4   3 1535.75   61.59
   4  -8   3 1512.55   59.09
   8   4   3 1456.05   60.29
  -4   8   3 1571.14   60.39
   4  -8   3 1467.25   56.99
   8   3  -3   14.70    4.10
   3  -8  -3    9.60    5.30
   3  -8   3   11.10    3.10
   8   3   3    6.70    2.70
  -3   8   3    7.80    3.20
   8   3   3    5.50    3.30
   2  -8  -3    2.90    5.10
   8   2  -3    6.50    3.70
   8   2   3   12.90    3.60
   2  -8   3    5.20    2.90
   8   2   3    9.90    2.90
  -2   8   3   11.30    3.40
  -8  -2   3   10.30    3.50
   1  -8  -3   37.50    7.30
   8   1  -3   40.50    5.90
  -1   8   3   49.10    6.30
   1  -8   3   33.30    5.20
   8   1   3   42.10    5.30
   1  -8   3   38.20    5.30
  -8  -1   3   50.19    6.10
   0  -8  -3 2056.59   82.49
   8   0  -3 1990.00   80.09
  -8   0   3 1989.30   79.99
   8   0   3 1944.71   78.89
   0  -8   3 2122.79   79.29
   0  -8   3 1981.70   78.99
   0   8   3 1994.10   79.59
   8   0   3 1899.11   78.29
  -1  -8  -3   27.20    4.80
  -1  -8  -3    9.70    6.10
   8  -1  -3   17.20    4.70
   8  -1   3   36.00    4.80
  -8   1   3   20.80    4.00
   1   8   3   21.00    4.50
   8  -2  -3  261.67   15.20
  -2  -8  -3  271.77   17.50
  -2  -8  -3  279.87   14.60
  -2  -8   3  258.27   14.50
   2   8   3  270.47   15.10
  -8   2   3  277.07   14.50
   8  -2   3  285.37   13.40
  -3  -8  -3   -2.00    3.00
  -3  -8  -3   -3.20    4.70
   8  -3  -3   -7.10    3.50
  -3  -8   3    3.90    3.00
  -8   3   3   -2.20    2.20
   8  -3   3    5.40    2.40
  -4  -8  -3  492.75   23.60
  -4  -8  -3  493.55   27.00
   4   8  -3  454.25   21.10
   8  -4  -3  573.34   25.30
   8  -4   3  506.15   21.80
  -4  -8   3  468.55   24.20
  -8   4   3  509.55   23.50
   8  -4   3  587.44   22.60
  -5  -8  -3   24.30    7.50
   5   8  -3   32.50    3.90
  -5  -8  -3   24.60    4.70
   8  -5  -3   38.00    6.20
   8  -5   3   39.30    5.00
  -5  -8   3   29.90    5.60
   8  -5   3   41.10    4.10
  -8   5   3   25.60    4.50
  -6  -8  -3   63.19   10.60
  -6  -8  -3   68.29    7.40
   8  -6  -3   56.39    7.90
  -8   6   3   60.09    6.60
   8  -6   3   59.39    5.90
  -6  -8   3   59.79    8.00
   7   8  -3   26.30    4.70
   8  -7  -3   36.00    7.20
  -7  -8   3   36.10    6.00
   8  -7   3   27.30    4.40
  -8   7   3   39.10    5.70
   8  -7   3   45.10    3.80
   8   8  -3   21.70    4.40
  -8   8   3   24.90    4.70
   8  -8   3   29.50    4.20
   8  -8   3   30.40    3.60
  -8  -8   3   28.00    5.50
   8   8   3   26.70    5.20
   9   8  -3   -2.20    2.60
   8  -9  -3    9.30    5.30
  -8   9   3    5.60    3.30
   8  -9   3    6.20    2.00
   9   8   3    6.20    3.80
  -9  -8   3    5.40    3.70
   7  -9  -3   11.70    5.30
   9   7  -3    4.30    3.30
   7  -9   3    5.30    3.00
  -9  -7   3    6.50    3.90
   9   7   3    2.90    3.90
  -7   9   3    8.00    3.50
   7  -9   3    9.40    2.10
   6  -9  -3   -2.10    4.60
   9   6  -3    3.30    3.90
   6  -9   3    5.60    2.70
   6  -9   3   -3.80    1.80
   9   6   3   -3.60    3.40
   9   6   3    6.00    2.80
  -6   9   3    1.60    2.90
  -9  -5  -3    9.50    2.80
   9   5  -3   14.90    4.20
   5  -9   3    5.80    2.70
   9   5   3    6.20    2.90
  -9  -5   3    5.90    3.80
  -5   9   3    9.70    3.40
   9   5   3    3.90    3.60
   5  -9   3    4.70    1.50
   4  -9  -3   20.00    6.30
   9   4  -3   10.70    3.90
  -9  -4  -3   10.00    2.60
   4  -9   3    2.70    2.70
  -9  -4   3    8.90    4.00
   9   4   3    8.20    2.80
   9   4   3    5.10    3.40
   3  -9  -3   15.20    5.90
   9   3  -3   11.60    4.10
   3  -9   3    2.70    3.10
  -9  -3   3    5.50    3.50
  -3   9   3    2.50    3.50
   9   3   3    5.10    3.00
   9   3   3    5.70    2.70
   9   2  -3    2.60    3.30
   2  -9  -3   11.00    5.50
  -9  -2   3    4.60    3.00
  -2   9   3    0.60    3.50
   9   2   3    2.60    2.60
   2  -9   3    1.00    2.80
   9   2   3    2.20    2.80
   1  -9  -3   10.40    6.10
   9   1  -3   19.40    4.60
   9   1   3   10.90    3.40
   1  -9   3   14.00    4.00
  -1   9   3   17.50    4.30
  -9  -1   3   17.60    3.90
   9   1   3   21.50    4.20
   1  -9   3   12.50    4.30
   0  -9  -3   13.40    6.40
   9   0  -3   10.00    4.60
  -9   0   3   11.60    3.70
   9   0   3    4.10    2.80
   0   9   3   17.00    3.90
   0  -9   3   10.50    4.20
   9   0   3   13.30    3.30
   0  -9   3    6.10    4.00
  -1  -9  -3   14.50    4.10
  -1  -9  -3   15.20    6.00
  -9   1   3    5.40    3.10
   1   9   3   11.60    4.20
   9  -1   3    4.10    2.80
   9  -1   3    2.40    3.10
  -2  -9  -3   67.39    9.90
   9  -2  -3   55.89    7.60
  -2  -9  -3   75.99    8.00
  -2  -9   3   79.19    8.50
   9  -2   3   69.09    6.10
   2   9   3   67.59    8.30
  -9   2   3   67.79    7.00
   9  -2   3   72.09    6.30
   9  -3  -3   12.90    4.80
  -3  -9  -3   13.50    4.30
  -3  -9  -3   15.80    6.40
  -3  -9   3   10.30    4.00
   9  -3   3   11.90    2.90
  -9   3   3   12.70    3.70
   9  -3   3   13.60    3.20
   9  -4  -3   34.50    6.10
  -9   4   3   27.20    4.60
   9  -4   3   32.40    4.30
  -4  -9   3   31.60    5.60
   9  -4   3   28.40    4.20
  -5  -9  -3   -5.10    5.20
   9  -5  -3   -5.00    3.90
  -5  -9  -3    0.40    2.80
  -9   5   3   -0.50    2.60
   9  -5   3   -0.80    2.20
   9  -5   3   -0.90    1.90
   9  -6  -3   40.20    7.10
   6   9  -3   44.90    5.10
  -6  -9  -3   37.50    9.10
  -9   6   3   29.60    5.30
  -6  -9   3   50.59    7.60
   9  -6   3   40.50    4.20
   9  -6   3   32.10    5.10
   9  -7  -3   -0.70    4.10
   7   9  -3    4.80    2.40
  -7  -9   3    2.70    3.40
  -9   7   3   -1.20    2.70
   9  -7   3    0.10    1.70
   9  -7   3    0.20    2.60
   8   9  -3   57.69    6.10
   9  -8  -3   83.19    9.90
  -8  -9   3   62.09    8.60
   9  -8   3   62.19    4.80
   8   9   3   58.39    7.40
  -9   8   3   65.09    7.10
   9   9  -3   -4.20    2.20
   9  -9  -3   -3.80    4.20
  -9  -9   3    0.40    3.20
  -9   9   3    2.50    2.70
   9  -9   3   -1.80    1.60
   9   9   3   -2.70    3.10
   9 -10  -3   28.10    7.00
 -10  -9   3   24.50    5.80
   9 -10   3   35.40    4.10
  10   9   3   28.70    5.50
   8 -10  -3   -3.70    4.80
  10   8  -3   -0.20    3.30
  10   8   3   -1.10    3.00
 -10  -8   3    4.40    3.70
   8 -10   3    2.80    2.00
  -8  10   3    0.00    3.00
   7 -10  -3   13.90    5.90
  10   7  -3    5.80    3.60
  10   7   3    8.30    3.80
  -7  10   3   10.50    3.80
   7 -10   3    9.30    2.30
 -10  -7   3   11.20    4.10
  10   6  -3   47.90    6.20
   6 -10  -3   54.19    8.60
  -6  10   3   50.59    6.80
 -10  -6   3   49.40    7.50
  10   6   3   43.50    6.40
   6 -10   3   44.90    4.20
   5 -10  -3  172.08   13.70
  10   5  -3  143.09   10.90
  10   5   3  148.79   11.00
  10   5   3  151.88   10.60
   5 -10   3  166.78   10.20
 -10  -5   3  178.48   12.60
  -5  10   3  176.18   11.30
   4 -10  -3    3.10    5.70
  10   4  -3   -6.60    3.10
 -10  -4   3    0.30    3.20
  10   4   3   -0.70    3.00
  -4  10   3    3.10    3.10
  10   4   3    1.00    2.40
   4 -10   3    0.70    2.40
 -10  -3  -3    2.30    2.10
  10   3  -3   -6.90    3.20
   3 -10  -3   23.40    5.90
  -3  10   3    6.00    3.30
   3 -10   3   -2.00    2.70
  10   3   3   -4.20    2.60
 -10  -3   3    0.60    2.90
  10   3   3    3.10    2.60
  10   2  -3  106.79    9.40
 -10  -2  -3  104.59    7.00
   2 -10  -3  138.09   12.30
  10   2   3   97.19    8.00
 -10  -2   3  113.09    9.20
  -2  10   3  123.09    9.70
  10   2   3  105.99    8.10
   2 -10   3   75.69    8.20
  10   1  -3  171.18   12.00
 -10  -1   3  181.48   11.60
   1 -10   3  141.99   11.30
   1 -10   3  153.98   11.00
  10   1   3  171.58   10.40
  10   1   3  188.48   11.00
   0 -10  -3  176.08   14.80
  10   0  -3  132.19   11.00
  10   0   3  132.29    9.30
 -10   0   3  158.18   10.70
   0  10   3  154.38   11.10
  10   0   3  143.29    9.40
  -1 -10  -3   34.70    8.00
  -1 -10  -3   28.90    5.70
  10  -1  -3   26.60    5.80
 -10   1   3   32.00    5.30
  10  -1   3   39.40    5.30
  -1 -10   3   20.40    5.50
  10  -1   3   49.80    5.90
   1  10   3   24.70    5.80
  -1 -10   3   39.70    8.30
  10  -2  -3    5.20    4.50
  -2 -10  -3   15.00    6.30
  -2 -10  -3   12.90    4.60
  10  -2   3   11.00    3.30
  10  -2   3   12.80    3.30
  -2 -10   3   18.00    5.10
   2  10   3   10.50    4.50
  -2 -10   3   13.50    4.40
 -10   2   3   13.50    4.00
  -3 -10  -3   10.20    4.80
  10  -3  -3    6.20    4.40
  -3 -10  -3    2.90    5.70
  10  -3   3    8.80    2.80
  10  -3   3    3.80    2.80
 -10   3   3    3.20    3.00
  -3 -10   3    1.00    3.60
  10  -4  -3  717.93   32.90
  -4 -10  -3  717.03   35.30
  10  -4   3  702.63   29.50
  -4 -10   3  658.73   32.10
  10  -4   3  698.33   30.50
 -10   4   3  735.23   31.80
  10  -5  -3   12.50    5.20
  -5 -10  -3   10.90    7.00
  10  -5   3   14.20    2.90
 -10   5   3    8.00    3.60
  -5 -10   3    5.00    4.30
  10  -5   3   10.90    3.60
  10  -6  -3 1107.69   49.60
  -6 -10  -3 1178.88   52.39
 -10   6   3 1150.88   48.30
  -6 -10   3 1129.59   49.60
  10  -6   3 1124.19   45.50
  10  -6   3 1152.78   47.30
  10  -8  -3   87.19   10.30
   8  10   3   97.79    9.00
  -8 -10   3  102.69   10.30
  10  -8   3   94.59    6.20
 -10   8   3   95.09    8.60
  10  -9  -3   -5.00    4.30
   9  10  -3   -0.30    2.60
 -10   9   3    0.00    3.10
  -9 -10   3    3.70    3.90
   9  10   3    1.50    3.60
  10  -9   3    2.40    2.00
  10 -10  -3   88.09   11.90
  10 -10   3  102.89    6.80
 -10 -10   3   81.39   10.10
 -10  10   3  109.19    9.50
  10  10   3  108.89    9.50
  10 -11  -3   -4.70    4.90
  11  10  -3   -3.20    3.20
 -10  11   3    3.00    3.30
 -11 -10   3   -1.80    3.60
  11  10   3    7.10    4.30
  11   9  -3   -3.60    3.30
   9 -11  -3    2.70    5.50
  11   9   3    3.80    4.00
 -11  -9   3    3.10    3.80
  -9  11   3    1.50    3.50
  11   8  -3   -2.10    3.20
   8 -11  -3   14.40    5.90
  -8  11   3   -0.70    3.20
  11   8   3    1.80    3.70
 -11  -8   3    2.00    3.90
   7 -11  -3    9.90    5.70
  11   7  -3    4.00    3.90
  11   7   3   12.60    4.50
 -11  -7   3    9.00    4.50
  -7  11   3    5.80    3.70
   6 -11  -3    3.60    4.90
  11   6  -3    4.60    3.70
  11   6   3    1.40    3.50
 -11  -6   3    1.20    3.60
  -6  11   3    0.40    2.80
   5 -11  -3    9.50    6.20
  11   5  -3   39.30    6.00
 -11  -5   3   35.20    6.50
  11   5   3   25.10    5.30
  -5  11   3   22.90    5.00
   4 -11  -3   -8.70    5.30
  11   4  -3   -1.10    3.90
  11   4   3    1.80    3.30
 -11  -4   3    5.00    3.60
  -4  11   3    3.60    3.60
  11   3  -3   -2.90    3.40
   3 -11  -3   -2.70    5.10
  11   3   3    1.80    2.60
  11   3   3    0.70    3.10
 -11  -3   3   -1.80    2.70
  -3  11   3    3.40    3.30
  11   2  -3    0.10    3.80
   2 -11  -3    3.60    5.40
   2 -11   3    5.40    3.70
   2 -11   3    4.70    3.40
 -11  -2   3    4.80    3.40
  -2  11   3    4.30    3.70
  11   2   3    6.00    3.30
  11   2   3    3.50    2.80
  11   1  -3   -7.80    3.60
   1 -11  -3   -0.30    5.70
  11   1   3   -0.10    2.50
 -11  -1   3    3.50    3.00
   1 -11   3   -2.90    2.90
  -1  11   3   -2.20    3.00
  11   1   3    2.00    3.00
   1 -11   3   -5.70    2.90
  11   0  -3   18.00    5.10
 -11   0   3   21.60    5.00
  11   0   3   21.30    4.20
   0 -11   3   30.00    5.70
   0 -11   3   27.20    5.10
  11   0   3   22.40    4.20
   0  11   3   33.80    6.10
  -1 -11  -3   17.00    7.10
  11  -1  -3    8.80    4.50
  -1 -11   3   17.90    5.30
   1  11   3   26.80    5.70
  11  -1   3   12.70    3.70
 -11   1   3   13.60    4.60
  11  -1   3   19.60    4.00
  -1 -11   3   24.70    7.40
  11  -2  -3    4.80    4.90
  -2 -11  -3   13.90    6.40
  -2 -11   3   26.70    5.90
  11  -2   3   16.20    3.80
 -11   2   3   14.30    4.40
  11  -2   3   13.90    3.60
  11  -3  -3    3.30    5.20
  -3 -11  -3   15.10    6.90
 -11   3   3   13.60    4.20
  11  -3   3   14.50    4.10
  11  -3   3   17.70    3.50
  -3 -11   3   17.50    5.20
  -4 -11  -3   -1.80    6.10
  11  -4  -3    1.00    4.40
 -11   4   3   -3.20    2.60
  -4 -11   3   -1.80    3.10
  11  -4   3    0.90    2.60
  11  -4   3    0.20    2.20
  11  -5  -3    2.40    4.20
 -11   5   3   -3.20    2.60
  -5 -11   3    6.20    4.00
  11  -5   3    4.10    2.40
  11  -6  -3   31.50    6.80
  -6 -11  -3   44.30    9.80
  11  -6   3   31.10    4.30
  -6 -11   3   28.10    5.90
 -11   6   3   29.40    5.20
  11  -7  -3   20.50    6.30
  -7 -11   3   24.90    6.50
   7  11   3   14.70    5.10
 -11   7   3   17.70    4.70
  11  -7   3   15.30    3.10
  11  -8  -3   32.30    7.00
  -8 -11   3   32.50    6.50
 -11   8   3   48.10    6.90
  11  -8   3   32.80    4.30
   8  11   3   32.80    6.10
  11  -9  -3    9.90    5.70
   9  11   3    7.50    4.10
  -9 -11   3    3.50    4.10
  11  -9   3   -0.80    2.20
 -11   9   3   -0.20    3.00
  11 -10  -3    2.30    4.80
 -10 -11   3    4.30    4.10
 -11  10   3    0.10    3.30
  10  11   3   -0.40    3.80
  11 -10   3    1.20    2.40
  11 -11  -3   -1.20    4.90
 -11 -11   3   -1.50    3.50
 -11  11   3   -2.50    3.70
  11  11   3    2.50    3.90
  11 -12  -3   12.50    6.90
 -12 -11   3   16.40    5.50
  12  11   3    6.10    5.00
  10 -12  -3  206.38   16.60
 -12 -10   3  190.18   14.80
  12  10   3  159.68   12.50
 -10  12   3  174.78   13.40
  12   9  -3   26.00    5.60
   9 -12  -3   32.30    8.20
 -12  -9   3   26.40    6.60
  -9  12   3   35.70    6.50
  12   8  -3  103.09    9.70
   8 -12  -3  100.79   12.00
  -8  12   3  103.19    9.80
 -12  -8   3   93.99   10.80
  12   8   3  114.69    9.70
  12   7  -3   27.90    5.80
   7 -12  -3   31.90    8.10
 -12  -7   3   33.90    7.10
  12   7   3   32.60    5.80
  -7  12   3   37.40    6.40
  12   6  -3  798.22   36.70
   6 -12  -3  822.02   39.80
  -6  12   3  842.02   37.60
 -12  -6   3  864.91   39.00
  12   6   3  804.22   36.40
  12   5  -3   35.50    6.30
   5 -12  -3   30.10    7.40
  -5  12   3   35.90    6.30
 -12  -5   3   36.30    6.50
  12   4  -3  259.27   16.00
   4 -12  -3  254.37   18.30
  -4  12   3  304.07   16.70
 -12  -4   3  289.77   17.10
  12   4   3  281.97   15.50
  -3  12   3   10.10    4.00
  12   2  -3   13.50    4.90
   2 -12  -3    4.30    6.50
  -2  12   3   19.70    5.30
  12   2   3   18.20    4.10
 -12  -2   3   13.10    4.20
   2 -12   3   26.00    5.20
   1 -12  -3   62.89    9.90
  12   1  -3   61.49    8.00
  12   1   3   71.09    6.90
 -12  -1   3   69.39    7.90
  -1  12   3   72.39    8.80
   1 -12   3   58.19    8.00
  12   0  -3  279.97   16.70
   0 -12  -3  308.37   19.50
 -12   0   3  291.77   16.80
  12   0   3  284.67   14.90
   0 -12   3  277.77   16.60
   0  12   3  294.97   17.40
  -1 -12  -3    5.30    6.10
  12  -1  -3    6.00    4.30
  -1 -12   3   22.70    7.30
 -12   1   3    6.10    3.70
  12  -1   3   16.40    3.30
   1  12   3   14.10    5.00
  12  -2  -3   20.10    5.80
  -2 -12  -3   21.40    7.70
  12  -2   3   22.10    4.00
 -12   2   3   19.60    5.10
  -2 -12   3   34.50    6.70
  -3 -12  -3   26.90    8.60
  12  -3  -3   51.49    7.80
  12  -3   3   44.70    5.40
 -12   3   3   41.40    6.20
  -3 -12   3   40.50    6.60
  -4 -12  -3    1.60    7.20
  12  -4  -3    4.10    4.60
  -4 -12   3   11.60    4.40
 -12   4   3    6.60    3.50
  12  -4   3    7.70    2.90
  12  -5  -3   50.99    8.10
  -5 -12  -3   71.89   12.10
 -12   5   3   45.40    6.90
  -5 -12   3   64.19    9.10
  12  -5   3   61.09    5.50
  12  -6  -3  188.78   14.60
  -6 -12  -3  194.28   17.10
  -6 -12   3  199.18   14.50
 -12   6   3  204.28   13.10
  12  -6   3  203.88   10.60
  12  -7  -3   12.30    5.40
  -7 -12   3    5.70    4.90
  12  -7   3   16.80    3.10
 -12   7   3    7.60    3.70
  12  -8  -3    5.20    5.10
  12  -8   3    1.60    2.40
 -12   8   3    2.10    3.30
  -8 -12   3   11.00    4.80
   8  12   3   -0.50    4.10
  12  -9  -3   10.70    5.60
  12  -9   3    7.90    2.80
   9  12   3   10.50    4.90
 -12   9   3    5.60    3.90
  -9 -12   3   13.60    5.60
  12 -10  -3  280.87   19.60
 -10 -12   3  288.57   19.30
  10  12   3  297.47   17.30
  12 -10   3  297.67   14.60
  12 -11  -3   13.30    6.90
  11  12   3   14.40    5.30
 -11 -12   3   11.60    5.30
  12 -12  -3   30.10    8.40
 -12 -12   3   31.50    7.10
  12  12   3   37.10    6.80
  12 -13  -3    5.20    6.20
  13  12   3    3.60    4.50
  11 -13  -3   -3.80    5.90
  13  11   3    2.40    4.10
  10 -13  -3   14.80    7.30
  13  10  -3    7.20    4.80
 -13 -10   3   30.50    7.50
  13  10   3   20.10    5.70
   9 -13  -3    9.70    6.30
  13   9  -3   10.10    4.60
  -9  13   3    8.90    4.50
 -13  -9   3    9.80    5.00
  13   9   3    4.80    4.20
  13   8  -3   11.90    5.30
   8 -13  -3   11.70    7.00
 -13  -8   3   20.10    6.50
  13   8   3   18.20    5.30
  -8  13   3   14.60    5.30
   7 -13  -3    0.60    5.50
  13   7  -3    5.40    4.40
  -7  13   3    6.60    4.20
 -13  -7   3    3.30    4.40
  13   7   3    7.30    4.10
   6 -13  -3    4.60    5.80
  13   6  -3   11.80    4.70
  13   6   3    3.40    3.50
 -13  -6   3    2.80    3.80
  -6  13   3   10.80    4.50
   5 -13  -3    4.40    5.80
  13   5  -3    8.30    4.30
 -13  -5   3    3.10    3.80
  -5  13   3    3.80    3.70
  13   5   3    2.70    3.70
   4 -13  -3   -0.10    5.50
  13   4  -3    6.80    4.60
 -13  -4   3    1.80    3.80
  -4  13   3   12.40    4.80
  13   4   3    6.70    3.60
  13   3  -3   16.60    5.20
   3 -13  -3    9.50    6.40
  -3  13   3   15.40    5.00
  13   3   3   15.40    4.10
 -13  -3   3    8.50    4.40
   2 -13  -3   10.90    6.80
  13   2  -3   10.40    5.20
 -13  -2   3   18.60    5.10
   2 -13   3   18.00    5.10
  -2  13   3   17.10    5.10
  13   2   3   17.30    4.20
   1 -13  -3    4.60    6.00
  13   1  -3    1.30    4.10
  -1  13   3   -1.50    3.80
   1 -13   3    0.00    3.40
  13   1   3    5.30    3.10
 -13  -1   3    3.10    3.30
   0 -13  -3    1.90    5.40
  13   0  -3   -0.90    4.00
 -13   0   3    1.80    3.50
  13   0   3    2.70    2.80
   0 -13   3    2.30    4.90
   0  13   3    1.10    4.70
  13  -1  -3    1.20    4.20
  -1 -13  -3    7.00    5.80
  13  -1   3    1.70    2.60
  -1 -13   3   -3.60    5.80
   1  13   3    9.30    4.20
 -13   1   3   -2.70    2.80
  13  -2  -3   -3.70    4.30
  -2 -13  -3   11.80    6.60
  13  -2   3    3.00    2.80
 -13   2   3    3.90    3.40
  13  -3  -3   -6.40    4.70
  -3 -13  -3    2.30    6.60
  13  -3   3   12.90    3.40
  -3 -13   3   10.40    4.40
 -13   3   3   -1.70    2.70
  13  -4  -3    4.10    4.80
  -4 -13  -3    3.40    6.70
 -13   4   3    0.10    2.80
  -4 -13   3    8.10    3.80
  13  -4   3    0.70    2.50
  -5 -13  -3    9.90    7.90
  13  -5  -3    0.20    4.40
  -5 -13   3   -1.50    3.10
 -13   5   3   -0.30    2.80
  13  -5   3   -2.20    2.40
  13  -6  -3   -4.10    4.60
  -6 -13  -3  -11.40    6.90
  13  -6   3    1.80    2.50
 -13   6   3   -2.10    3.00
  13  -7  -3   16.80    6.10
   7  13   3   -3.40    4.00
  -7 -13   3    3.20    4.40
  13  -7   3    0.60    2.50
 -13   7   3   -2.70    3.00
  13  -8  -3    0.00    4.80
  13  -8   3    3.10    2.50
  -8 -13   3    1.40    4.90
 -13   8   3   -6.00    2.70
   8  13   3   -3.40    3.80
  13  -9  -3   -0.20    4.90
   9  13   3    0.60    4.10
  -9 -13   3    0.30    4.10
  13  -9   3    3.70    2.80
  13 -10  -3   22.60    7.50
  13 -10   3   21.80    4.20
  10  13   3   25.50    6.40
 -10 -13   3   29.60    7.40
  13 -11  -3    6.30    6.30
 -11 -13   3   13.40    6.00
  11  13   3   17.30    5.80
  13 -12  -3   25.30    8.30
  12  13   3   31.00    6.60
  13 -13  -3    6.30    7.10
  13  13   3    4.20    4.80
  13 -14  -3   -3.10    6.20
  14  13   3   -1.70    4.10
  12 -14  -3   44.10   10.70
  14  12   3   67.39    9.10
  11 -14  -3   11.20    7.00
  14  11   3    9.40    5.00
  10 -14  -3   -4.70    5.50
  14   9  -3    8.20    5.00
   9 -14  -3    4.90    6.20
  14   9   3    1.30    4.30
  14   8  -3    1.20    4.00
   8 -14  -3  -10.50    5.30
 -14  -8   3    0.90    4.70
  14   8   3    0.50    3.80
  14   7  -3   44.40    7.10
   7 -14  -3   29.80    8.30
  14   7   3   43.40    6.80
  -7  14   3   38.30    7.60
 -14  -7   3   40.90    7.70
  14   6  -3  253.77   16.20
   6 -14  -3  262.47   19.10
  -6  14   3  278.77   17.40
 -14  -6   3  264.17   17.70
  14   6   3  261.17   15.50
  14   5  -3    4.50    4.40
   5 -14  -3   -2.70    5.30
  14   5   3    4.50    3.70
 -14  -5   3    7.10    4.50
  -5  14   3    7.50    4.30
  14   4  -3   26.90    6.00
   4 -14  -3   15.00    7.20
 -14  -4   3   28.60    6.50
  -4  14   3   25.30    6.00
  14   4   3   23.90    5.30
  14   3  -3   48.20    7.60
   3 -14  -3   46.20    9.60
  -3  14   3   48.10    7.40
   3 -14   3   49.60    7.30
  14   3   3   57.59    7.20
 -14  -3   3   49.20    7.60
   2 -14  -3  153.98   14.90
  14   2  -3  158.68   12.30
   2 -14   3  151.98   12.50
 -14  -2   3  167.78   12.80
  14   2   3  160.18   10.90
  -2  14   3  154.98   13.00
  14   1  -3    0.90    4.40
   1 -14  -3   -7.90    5.00
   1 -14   3   -1.10    4.10
 -14  -1   3    1.80    3.20
  14   1   3   -0.10    3.00
  -1  14   3   -1.00    4.70
  14   0  -3  239.88   16.00
   0 -14  -3  268.07   19.10
 -14   0   3  265.57   16.20
  14   0   3  221.68   13.40
   0 -14   3  250.77   17.20
   0  14   3  269.97   17.70
  14  -1  -3    1.00    4.60
  -1 -14  -3   25.60    7.60
 -14   1   3    6.60    3.90
  -1 -14   3   18.80    7.60
  14  -1   3    0.10    3.00
  -2 -14  -3   10.50    7.50
  14  -2  -3   14.40    5.40
  -2 -14   3   31.40    6.60
  14  -2   3    9.30    3.40
 -14   2   3   13.70    4.40
  14  -3  -3    6.80    5.00
  -3 -14  -3   14.20    8.00
 -14   3   3    6.20    3.90
  -3 -14   3    9.70    5.30
  14  -3   3    6.20    3.10
  -4 -14  -3  469.15   28.00
  14  -4  -3  459.45   25.10
 -14   4   3  463.45   23.90
  -4 -14   3  450.45   24.80
  14  -4   3  478.45   21.30
  14  -5  -3   14.90    5.90
  -5 -14  -3   -7.80    7.50
  14  -5   3    6.60    3.00
  -5 -14   3    6.70    4.40
 -14   5   3    2.00    3.60
  -6 -14  -3  500.95   30.20
  14  -6  -3  506.95   27.40
  -6 -14   3  519.45   27.90
 -14   6   3  519.95   26.00
  14  -6   3  513.25   23.00
  14  -7  -3    1.20    4.90
   7  14   3   -0.50    4.10
  14  -7   3    1.50    2.70
  -7 -14   3    3.20    4.10
  14  -8  -3   -0.40    4.80
  14  -8   3   -2.80    2.40
   8  14   3    2.30    3.90
  -8 -14   3    3.20    5.70
  14  -9  -3    9.50    6.00
  14  -9   3    3.00    3.00
   9  14   3    2.50    4.20
  -9 -14   3    2.60    4.80
  14 -10  -3   22.50    7.90
 -10 -14   3   19.70    6.30
  14 -10   3   24.80    4.80
  10  14   3   28.50    6.50
  14 -11  -3   10.50    7.30
  11  14   3   19.20    5.90
  14 -12  -3   -6.20    5.40
  12  14   3    1.80    4.30
  14 -13  -3   -6.90    5.80
  13  14   3   -3.80    4.00
  14 -14  -3    4.80    7.10
  14  14   3    2.00    4.60
  14 -15  -3    5.30    8.50
  15  14   3    9.80    5.80
  13 -15  -3    0.60    7.00
  15  13   3   -2.40    4.10
  12 -15  -3    9.30    7.10
  15  12   3    0.60    4.40
  11 -15  -3   -2.30    6.00
  15  11   3    4.40    4.40
  10 -15  -3    4.40    6.30
  15  10  -3    1.30    6.20
  15  10   3    3.50    4.30
  15   9  -3    5.20    5.10
   9 -15  -3    4.70    6.70
  15   9   3   10.20    4.80
   8 -15  -3    4.30    6.30
  15   8  -3   -2.30    4.10
  15   8   3    2.10    4.40
   7 -15  -3   22.80    8.00
  15   7  -3   12.70    5.30
  15   7   3   17.20    5.20
   6 -15  -3   -4.30    6.00
  15   6  -3    1.30    4.30
 -15  -6   3    2.40    5.30
  15   6   3    5.10    4.20
  -6  15   3    4.60    4.50
  15   5  -3    2.40    4.30
   5 -15  -3    1.00    5.70
  15   5   3    3.20    3.80
 -15  -5   3    3.40    3.90
  -5  15   3    2.60    4.00
   4 -15  -3    4.30    6.50
  15   4  -3   -4.40    4.50
  15   4   3   -0.80    3.40
 -15  -4   3    5.50    4.10
  -4  15   3   -5.70    3.60
   3 -15  -3    0.40    5.80
  15   3  -3   -1.30    4.60
  15   3   3    2.30    3.60
 -15  -3   3    2.20    4.00
  -3  15   3    3.40    4.40
  15   2  -3   -2.10    4.10
   2 -15  -3   -1.20    5.90
   2 -15   3   -1.40    3.70
 -15  -2   3   -4.90    2.90
  -2  15   3   -1.50    4.40
  15   2   3   -0.40    3.10
  15   1  -3    4.10    4.60
   1 -15  -3   -4.50    5.20
   1 -15   3   -4.90    3.90
  -1  15   3   -1.90    4.70
  15   1   3   -1.10    2.90
 -15  -1   3   -0.60    3.80
   0 -15  -3   15.20    7.20
  15   0  -3   10.80    5.80
 -15   0   3   14.80    5.40
   0  15   3   13.10    5.70
   0 -15   3   19.70    7.20
  15   0   3   13.80    4.00
  15  -1  -3    7.60    6.00
  -1 -15  -3   35.80    8.60
 -15   1   3   17.80    5.60
  15  -1   3   10.70    3.80
  15  -2  -3   22.90    6.40
  -2 -15   3   27.00    8.20
  15  -2   3   15.40    4.00
 -15   2   3   13.50    5.10
  -3 -15  -3   19.20    8.50
  15  -4  -3    2.00    5.40
  -4 -15  -3    5.50    7.50
  -4 -15   3    2.80    4.00
  15  -4   3    2.20    3.00
  -5 -15  -3    2.10    7.70
  15  -5  -3   -2.10    4.80
  15  -5   3    1.80    3.10
  -5 -15   3   -1.00    3.80
  15  -6  -3    8.90    5.70
  -6 -15   3    5.80    4.90
  15  -6   3    5.50    3.20
  15  -8  -3   13.80    6.30
   8  15   3    6.60    4.70
  15  -8   3    5.20    3.20
  -8 -15   3    8.80    6.80
  15  -9  -3    5.00    6.80
   9  15   3   19.80    5.80
  15  -9   3   14.70    4.10
  15 -10  -3   -2.20    5.90
  10  15   3   11.80    5.30
  15 -10   3   12.10    4.10
  15 -11  -3   -4.70    6.00
  11  15   3    4.30    5.10
  15 -12  -3   -4.80    5.40
  12  15   3   -2.80    4.30
  15 -13  -3   -3.90    6.00
  13  15   3   -6.10    4.00
  15 -14  -3    4.20    7.60
  14  15   3    9.80    5.60
  15 -15  -3    2.40    6.90
  15  15   3    2.50    4.90
  14 -16  -3   56.89   12.30
  16  14   3   53.69    8.70
  13 -16  -3    4.40    7.60
  16  13   3    2.90    4.80
  12 -16  -3  157.68   18.10
  16  12   3  192.38   14.00
  11 -16  -3    7.30    7.60
  16  11   3    8.80    4.90
  10 -16  -3    8.40    7.40
  16  10   3   13.80    5.10
  16   9  -3   10.00    5.50
   9 -16  -3   22.70    7.70
  16   9   3    5.20    4.80
   8 -16  -3  303.97   22.10
  16   8  -3  286.37   18.50
  16   8   3  300.27   17.70
   7 -16  -3    9.10    7.10
  16   7  -3    9.70    5.40
  16   7   3    8.30    4.60
  16   6  -3  190.58   14.50
   6 -16  -3  193.28   17.60
  16   6   3  200.08   13.40
   5 -16  -3   -4.30    6.10
  16   5  -3    4.40    4.70
  16   5   3   -0.60    3.50
   4 -16  -3   36.50    9.70
  16   4  -3   35.40    7.40
  16   4   3   35.80    6.00
  -4  16   3   34.50    7.50
  16   3  -3   16.10    5.90
   3 -16  -3    4.80    7.00
  -3  16   3   19.10    7.00
  16   3   3    5.90    3.80
   2 -16  -3   -6.40    5.70
  16   2  -3   -4.70    4.20
  -2  16   3   -1.80    4.60
  16   2   3   -1.60    3.20
   1 -16  -3   -1.50    6.20
  16   1  -3    0.90    4.70
  16   1   3   -0.50    3.00
  -1  16   3    3.40    5.00
   0 -16  -3   59.49   10.90
  16   0  -3   74.79    9.80
   0 -16   3   94.19   13.50
  16   0   3   66.59    7.20
  -1 -16  -3    5.60    7.50
  16  -1  -3    8.60    5.40
  16  -1   3    9.40    3.70
  -1 -16   3    6.90    7.40
  16  -2  -3   10.70    5.70
  -2 -16  -3    3.70    7.30
  -2 -16   3    9.10    6.20
  16  -2   3   12.70    4.00
  16  -3  -3   11.90    5.80
  -3 -16  -3    5.40    7.90
  16  -3   3   10.40    3.70
  -3 -16   3    0.50    4.60
  -4 -16  -3  400.86   26.00
  16  -4  -3  395.76   23.30
  -4 -16   3  387.96   24.30
  16  -4   3  397.26   19.30
  16  -5  -3   11.60    6.50
  -5 -16  -3   15.90    9.00
  16  -5   3    4.30    3.40
  16  -6  -3  247.08   18.00
   6  16   3  259.67   16.30
  16  -6   3  253.07   14.00
  16  -7  -3   -1.60    5.60
   7  16   3    1.60    4.50
  16  -7   3    0.50    3.10
  16  -8  -3   72.49   11.10
  16  -8   3   84.09    7.90
   8  16   3   91.49   10.70
  16  -9  -3    2.00    6.50
   9  16   3    2.10    4.80
  16  -9   3    2.70    3.70
  16 -10  -3  233.18   19.80
  16 -10   3  248.58   14.80
  10  16   3  273.17   17.00
  16 -11  -3    2.00    6.30
  11  16   3    1.90    5.10
  16 -12  -3    4.90    6.90
  16 -13  -3   -2.10    6.40
  13  16   3   -0.90    4.60
  16 -14  -3   40.90   10.40
  14  16   3   56.99    8.70
  13 -17  -3   -7.30    6.90
  17  13   3   -1.80    4.40
  12 -17  -3    2.60    8.00
  17  12   3   10.30    5.40
  11 -17  -3   10.90    8.00
  17  11   3    3.30    4.70
  10 -17  -3   18.10    8.50
  17  10   3   20.20    5.90
  17   9  -3    9.10    5.80
   9 -17  -3    4.00    7.20
  17   9   3    3.10    4.60
   8 -17  -3   15.90    8.30
  17   8  -3   15.50    6.20
  17   8   3    9.70    5.00
   7 -17  -3    2.50    7.20
  17   7  -3   47.60    7.60
  17   7   3    5.80    4.40
   6 -17  -3    0.70    6.90
  17   6  -3   -1.60    4.90
  17   6   3    2.20    4.20
   5 -17  -3   38.70    9.10
  17   5  -3   11.50    5.80
  17   5   3   11.60    4.80
   4 -17  -3   18.30    8.00
  17   4  -3    9.90    5.90
  17   4   3   13.90    4.70
  17   3  -3    4.60    5.10
   3 -17  -3   -0.90    6.50
  17   3   3   -2.50    3.10
  17   2  -3    3.00    4.90
   2 -17  -3   -8.20    5.90
  17   2   3    9.60    4.20
  -2  17   3    6.10    6.70
   1 -17  -3  -10.10    6.10
  17   1  -3   -5.50    4.60
  17   1   3   -1.90    3.20
  -1  17   3    2.70    4.80
  17   0  -3   -6.10    4.70
   0 -17  -3   -3.20    6.80
  17   0   3    4.90    3.40
  17  -1  -3   -1.40    5.00
  -1 -17  -3   -0.60    7.40
  17  -1   3    5.30    3.60
  -2 -17  -3   -6.60    7.30
  17  -2  -3   10.50    5.90
  17  -2   3    2.80    3.50
  17  -4  -3   -4.70    5.30
  -4 -17  -3   -3.20    8.30
  17  -4   3   -7.50    3.10
  -5 -17  -3   -9.10    7.50
  17  -5  -3   -1.50    5.70
  17  -5   3    0.60    3.50
  17  -6  -3    9.20    6.60
  17  -6   3    3.50    3.70
   6  17   3    7.40    5.10
  17  -7  -3   11.00    7.00
   7  17   3   14.20    5.80
  17  -7   3    7.40    4.00
  17  -8  -3    6.30    6.10
   8  17   3    0.20    4.50
  17  -8   3   -0.50    3.30
  17  -9  -3   -0.90    6.30
  17  -9   3    3.20    3.80
   9  17   3    4.30    4.90
  17 -10  -3    6.40    6.90
  17 -10   3   10.00    4.60
  10  17   3    9.60    5.50
  17 -11  -3    3.50    6.80
  11  17   3   -2.00    5.50
  17 -12  -3    7.90    7.50
  12  17   3    9.90    5.70
  17 -13  -3   16.00    8.60
  13  17   3   20.00    6.30
  12 -18  -3   60.29   12.80
  18  12   3   66.69    9.10
  11 -18  -3    0.20    7.60
  18  11   3   -0.90    4.10
  10 -18  -3   28.00    9.90
  18  10   3   14.60    5.80
   9 -18  -3   10.30    8.20
  18   9  -3    5.80    6.00
  18   9   3   12.30    5.20
  18   8  -3  277.77   18.20
   8 -18  -3  248.98   21.20
  18   8   3  244.08   16.20
  18   7  -3    8.80    5.80
   7 -18  -3    7.20    7.70
  18   7   3    0.30    4.20
   6 -18  -3  191.88   18.80
  18   6  -3  198.18   15.60
  18   6   3  201.28   13.70
  18   5  -3   11.00    6.10
   5 -18  -3   16.30    8.30
  18   5   3    6.80    4.60
   4 -18  -3   62.29   11.50
  18   4  -3   53.49    9.40
  18   4   3   88.19    9.20
   3 -18  -3   -4.60    6.20
  18   3  -3   -1.10    4.90
  18   3   3    4.80    3.90
   2 -18  -3  223.38   19.30
  18   2  -3  222.38   16.90
  18   2   3  230.48   14.20
  18   1  -3   -0.80    4.90
   1 -18  -3    2.30    6.80
  18   1   3    3.10    3.70
   0 -18  -3   -5.80    7.00
  18   0  -3   -4.30    4.90
  18   0   3   -0.90    3.30
  18  -1  -3   -7.80    4.50
  -1 -18  -3   23.90    8.80
  18  -1   3    5.80    3.50
  18  -2  -3   46.30    9.00
  -2 -18  -3   42.70   11.00
  18  -2   3   31.40    5.70
  18  -3  -3   -2.60    5.70
  -3 -18  -3    5.10    9.20
  18  -3   3    1.40    3.60
  -4 -18  -3   16.60    9.80
  18  -4  -3   35.20    8.50
  18  -4   3   21.60    4.90
  18  -5  -3    0.20    5.70
  18  -5   3    1.60    3.70
  18  -6  -3    0.90    5.80
   6  18   3    5.70    4.90
  18  -6   3   -0.20    3.50
  18  -7  -3   -0.20    5.80
  18  -7   3    0.80    3.70
   7  18   3   -1.70    4.50
  18  -8  -3   15.70    7.50
   8  18   3    6.40    5.10
  18  -8   3    5.10    4.00
  18  -9  -3    0.10    6.50
   9  18   3   18.70    6.30
  18  -9   3    5.90    4.40
  18 -10  -3   73.59   12.50
  18 -10   3   87.59   14.20
  10  18   3  105.09   11.60
  18 -11  -3    4.00    7.30
  11  18   3    4.50    5.50
  18 -12  -3   12.30    7.60
  12  18   3    0.30    5.30
  19  10   3    7.70    5.00
  19   9  -3   14.30    6.60
  19   9   3    7.20    4.90
  19   8  -3    9.60    5.80
  19   8   3    4.70    4.80
  19   7  -3    2.10    5.60
  19   7   3   -4.70    3.90
  19   6  -3   11.80    6.30
   6 -19  -3   18.90   12.20
  19   6   3   15.70    5.30
   5 -19  -3   19.30   10.30
  19   5  -3   10.90    6.40
  19   5   3   11.20    5.10
  19   4  -3   16.10    6.60
   4 -19  -3   14.80    9.50
  19   4   3    6.50    4.50
   3 -19  -3    3.00    7.90
  19   3  -3   -3.40    5.20
  19   3   3   -2.20    3.80
  19   2  -3    0.20    5.40
   2 -19  -3    5.00    8.00
  19   2   3    3.00    4.00
  19   1  -3   11.80    6.20
   1 -19  -3    9.90    8.60
  19   1   3   10.90    4.40
   0 -19  -3    8.00    8.80
  19   0  -3   12.30    6.90
  19   0   3   16.60    4.80
  19  -1  -3    2.80    6.00
  -1 -19  -3    6.20    9.10
  19  -1   3    0.10    3.50
  -2 -19  -3   17.30    9.70
  19  -2  -3    4.10    6.50
  19  -2   3    8.70    4.40
  -3 -19  -3   -1.30    9.20
  19  -3  -3    1.70    6.10
  19  -3   3    2.30    3.80
  -4 -19  -3    1.10    9.80
  19  -4  -3    2.30    6.50
  19  -4   3    1.80    3.90
  19  -5  -3   -7.50    5.60
  19  -5   3   -8.10    3.60
  19  -6  -3   -0.10    6.00
  19  -6   3    1.20    3.80
  19  -7  -3   -0.10    6.00
  19  -7   3    5.50    4.20
  19  -8  -3    3.20    6.80
  19  -8   3    3.70    4.30
  19  -9  -3   -1.10    6.20
  19  -9   3    1.30    4.00
  19 -10  -3    8.00    7.70
  20   8  -3    2.90    5.70
  20   8   3    4.60    4.90
  20   7  -3    8.40    6.40
  20   7   3   10.00    5.30
  20   6  -3   -0.30    5.80
  20   6   3   -2.20    4.10
  20   5  -3    2.00    6.00
  20   5   3    5.00    4.60
  20   4  -3   29.70    8.80
  20   4   3   27.10    6.20
  20   3  -3    7.30    6.20
  20   3   3    5.70    4.50
  20   2  -3  206.98   17.60
  20   2   3  217.78   14.20
  20   1  -3    1.80    6.30
  20   1   3   -6.10    3.70
  20   0  -3    1.30    6.00
  20   0   3   -2.40    3.90
  20  -1  -3    6.70    6.20
  20  -1   3   -0.10    4.30
  20  -2  -3  320.97   22.10
  20  -2   3  293.97   17.30
  20  -3  -3    6.10    6.40
  20  -3   3    8.70    4.60
  20  -4  -3  127.29   15.00
  20  -4   3  145.89   11.40
  20  -5  -3   -0.70    6.30
  20  -5   3    1.90    4.10
  20  -6  -3    8.10    6.90
  20  -6   3    2.00    4.20
  20  -7  -3   12.00    7.90
  20  -7   3    0.20    4.00
  20  -8  -3   37.00    9.70
  20  -8   3   20.70    6.00
  21   5  -3   -4.90    5.70
  21   5   3   -3.20    4.10
  21   4  -3   -0.90    5.90
  21   4   3   -0.80    4.00
  21   3  -3    0.40    6.10
  21   3   3   -6.30    3.80
  21   2  -3    1.90    6.30
  21   2   3    7.40    4.70
  21   1  -3    3.90    7.20
  21   1   3    9.10    5.00
  21   0  -3    8.90    7.20
  21   0   3   15.50    5.50
  21  -1  -3    8.10    7.00
  21  -1   3   13.70    5.30
  21  -2  -3    9.10    7.20
  21  -2   3    9.50    4.70
  21  -3  -3    6.50    6.40
  21  -3   3   -1.00    4.20
  21  -4  -3   -3.20    6.60
  21  -4   3    2.80    4.40
  21  -5  -3    6.60    7.30
  21  -5   3    5.20    4.60
   0   0  -4   69.09    8.30
   0  -1  -4   -0.70    3.90
  -1   0  -4    7.10    4.50
   0   1  -4   -1.90    3.60
   1   0  -4   -1.70    3.10
  -1  -1  -4  112.69   10.00
   1   1  -4   66.79    8.10
   1  -1  -4   85.49    8.90
  -1   1  -4   90.19   10.00
   1  -2  -4  197.18   13.40
   2   1  -4  172.08   11.80
  -2  -1  -4  196.58   14.10
  -1   2  -4  162.28   12.80
  -2   0  -4   -3.50    4.50
  -1  -2  -4   38.60    7.40
   2  -1  -4   36.20    6.40
  -2   1  -4   42.10    7.60
  -2   2  -4    8.30    5.50
   2  -2  -4   21.20    5.30
  -2   3  -4    5.70    5.00
  -3  -1  -4  276.47   17.80
   3   1  -4  252.27   14.80
   1  -3  -4  236.28   15.90
  -1   3  -4  281.37   15.60
  -3  -1   4  246.48   12.30
   3   0  -4    4.60    4.10
   0  -3  -4    1.10    5.40
   0   3  -4    4.60    4.30
  -3   0  -4   -1.20    5.20
  -3   0   4    2.90    1.90
   1   3  -4 1066.19   46.30
   3  -1  -4 1082.29   47.30
  -1  -3  -4 1167.88   49.00
  -3   1  -4 1146.59   48.40
  -3   1   4 1077.89   44.30
   3  -2  -4   21.50    5.40
   2   3  -4   25.80    5.00
  -2  -3  -4   15.70    6.00
  -3   2  -4   22.30    6.00
  -3   2   4   11.50    3.10
  -3   3  -4 1474.15   62.29
   3  -3  -4 1505.45   62.99
   3   3  -4 1501.15   61.19
  -3  -3  -4 1491.95   64.09
  -3   3   4 1546.95   59.49
  -3  -3   4 1490.95   59.89
   3  -4  -4   34.00    6.80
  -3   4  -4   43.70    6.90
  -4  -3  -4   32.80    7.90
   4   3  -4   52.39    6.80
  -3   4   4   45.40    4.70
  -4  -3   4   52.99    6.30
  -4  -2  -4   29.90    7.50
   4   2  -4   18.20    4.70
  -4  -2   4   44.30    5.10
  -2   4   4   32.40    4.60
  -4  -1  -4  101.39   11.90
  -1   4  -4   87.39    9.40
   1  -4  -4  107.89   11.00
   4   1  -4  107.09    9.20
  -1   4   4  112.29    6.90
  -4  -1   4  103.89    7.30
   4   0  -4    7.60    4.10
   0  -4  -4   16.40    6.50
  -4   0  -4    5.80    5.30
   1   4  -4   37.20    6.00
  -4   1  -4   33.00    7.20
  -1  -4  -4   28.50    7.40
  -4   1   4   30.10    4.40
  -4   2  -4   20.80    5.50
   2   4  -4    4.90    3.70
   4  -2  -4    0.70    4.00
  -2  -4  -4    0.30    5.20
  -4   2   4    1.00    2.20
   4  -3  -4   15.30    5.60
   3   4  -4    1.50    4.30
  -4   3  -4   14.00    6.00
  -3  -4   4   18.50    3.30
  -4   3   4   16.10    3.10
   4   4  -4    0.10    3.30
   4  -4  -4   -5.00    4.10
  -4  -4  -4   -2.00    4.90
  -4  -4   4    3.00    2.30
  -4   4   4   -2.30    2.10
   4  -4   4   -0.60    2.30
   4  -5  -4  118.49   11.50
  -5  -4  -4   65.59   10.00
   5   4  -4   78.79    7.70
  -4   5   4   81.79    6.60
  -5  -4   4   80.09    7.20
   4  -5   4   76.69    5.80
  -5  -3  -4   23.60    7.60
   3  -5  -4   22.70    6.90
   3  -5   4   33.60    4.10
  -3   5   4   27.90    4.00
   5   2  -4   14.10    4.40
   2  -5  -4    8.80    5.50
  -5  -2  -4   18.40    7.20
  -2   5   4   18.30    3.30
  -5  -2   4   17.60    3.60
  -5  -1  -4  325.47   21.30
   1  -5  -4  380.06   21.00
   5   1  -4  363.86   18.80
  -1   5  -4  341.47   18.20
  -1   5   4  367.86   16.80
  -5  -1   4  394.66   17.40
   0  -5  -4   39.90    8.50
  -5   0  -4   34.50    7.60
   5   0  -4   30.50    5.80
   0   5  -4   36.00    5.90
   0   5   4   29.30    4.00
  -5   0   4   37.20    4.80
  -5   1  -4  218.38   15.30
   5  -1  -4  192.48   13.00
   1   5  -4  202.68   12.10
  -5   1   4  193.48   10.80
   2   5  -4  124.09    9.10
  -2  -5  -4  123.09   12.50
   5  -2  -4  106.89   10.60
  -5   2   4  129.29    8.20
  -2  -5   4  120.29    8.50
   5  -2   4  135.29    8.40
   2   5   4  148.79    8.70
  -3  -5  -4   53.99    9.30
   5  -3  -4   74.99    9.50
   3   5  -4   61.89    6.80
  -5   3   4   53.49    5.60
  -3  -5   4   69.49    6.50
   5  -3   4   59.39    5.60
  -4  -5  -4   37.30    7.80
   5  -4  -4   17.10    5.50
   4   5  -4   24.80    4.60
  -4  -5   4   20.20    4.00
   5  -4   4   22.30    3.70
  -5   4   4   18.70    3.60
   5   5  -4  633.64   26.30
  -5  -5  -4  554.64   30.10
   5  -5  -4  531.35   28.20
   5  -5   4  552.54   24.00
  -5   5   4  568.24   25.20
   5  -6  -4   10.40    5.40
   6   5  -4   11.50    3.70
  -6  -5  -4    7.20    7.20
   5  -6   4    7.40    2.30
  -6  -5   4    6.70    3.30
  -5   6   4    8.60    3.20
  -6  -4  -4    4.60    6.80
   4  -6  -4    6.40    5.50
   6   4  -4   21.80    4.70
  -6  -4   4    4.40    3.80
  -4   6   4    4.80    2.80
   4  -6   4    8.50    2.40
   3  -6  -4  275.67   18.00
   6   3  -4  284.87   15.80
  -6  -3  -4  271.67   19.10
   3  -6   4  276.37   12.80
  -6  -3   4  295.17   15.30
  -3   6   4  292.47   14.40
   6   2  -4    3.40    3.90
   2  -6  -4   -2.00    5.00
  -6  -2   4    5.10    2.70
   6   1  -4    1.40    3.70
   1  -6  -4   -7.50    4.40
  -1   6  -4   -6.50    3.50
  -6  -1  -4    7.00    6.20
  -1   6   4    0.10    2.40
  -6  -1   4    1.80    2.30
   6   0  -4    0.00    3.50
   0  -6  -4   -2.10    5.70
   0   6  -4    3.30    3.80
   0   6   4    3.30    2.90
   6   0   4   -3.50    3.40
  -6   0   4    1.20    2.40
  -1  -6  -4  157.98   13.70
   6  -1  -4  135.49   11.30
   1   6  -4  144.59   10.20
   6  -1   4  139.29    9.30
   1   6   4  159.78    9.70
  -1  -6   4  164.78    9.40
  -6   1   4  152.18    9.40
   6  -2  -4    7.80    4.40
  -2  -6  -4    0.20    5.20
   2   6  -4    9.60    3.50
   2   6   4    4.30    2.90
  -6   2   4    1.90    2.30
   6  -2   4   -0.40    2.50
  -2  -6   4    1.40    2.70
   6  -3  -4    0.50    3.90
  -3  -6  -4   21.20    6.70
   3   6  -4   -6.20    3.20
   6  -3   4   -2.40    2.50
  -3  -6   4    9.40    3.00
  -6   3   4    2.20    2.60
   6  -4  -4    9.50    5.00
   4   6  -4    3.10    3.20
  -4  -6  -4   11.40    6.40
  -6   4   4   -1.00    2.40
   6  -4   4   -1.90    2.40
  -4  -6   4    7.30    3.40
   6  -5  -4   81.49   10.50
  -5  -6  -4   78.49   11.20
   5   6  -4   58.69    7.20
   6  -5   4   74.09    5.90
  -5  -6   4   82.39    7.80
  -6   5   4   85.99    7.20
   6  -6  -4   -1.30    4.90
   6   6  -4   11.30    3.60
  -6  -6  -4    0.60    6.60
   6  -6   4    2.20    2.10
  -6  -6   4    2.60    3.10
  -6   6   4    1.20    2.50
   6  -7  -4    0.30    5.90
  -7  -6  -4   18.90    8.10
  -6   7   4   10.30    3.30
  -7  -6   4   19.70    4.30
   6  -7   4    6.00    2.30
   7   5  -4 1343.77   55.09
  -7  -5  -4 1260.07   59.19
   5  -7  -4 1319.77   57.89
  -7  -5   4 1350.16   55.49
   5  -7   4 1325.67   51.99
  -5   7   4 1351.26   54.39
   7   4  -4   76.19    8.00
   4  -7  -4   51.99    8.30
  -7  -4  -4   43.50    9.90
   4  -7   4   50.29    4.30
  -4   7   4   49.10    6.40
   3  -7  -4  580.44   29.40
   7   3  -4  575.84   26.90
  -7  -3   4  588.84   26.50
  -3   7   4  565.14   25.40
   3  -7   4  558.44   23.10
   7   3   4  545.35   26.00
   7   2  -4   28.50    5.80
   7   2   4   16.40    4.70
  -7  -2   4   13.50    3.90
   2  -7   4   17.10    2.80
   1  -7  -4  591.44   30.80
   7   1  -4  603.84   28.50
   7   1   4  598.84   27.30
  -1   7   4  604.24   26.80
  -7  -1   4  626.84   27.40
   7   0  -4   81.69    9.10
   0   7  -4   78.89    7.90
   7   0   4   87.29    7.70
   0  -7   4   78.19    7.50
   0  -7   4   90.39    7.30
  -7   0   4   86.09    7.40
  -1  -7  -4  651.03   28.60
   1   7  -4  637.34   28.50
   7  -1  -4  645.14   31.00
  -1  -7  -4  674.63   33.70
   1   7   4  691.43   29.40
  -1  -7   4  652.73   28.90
  -7   1   4  691.83   29.50
   7  -1   4  681.83   29.10
  -2  -7  -4    7.90    3.00
  -2  -7  -4    5.90    6.30
   7  -2  -4    3.40    4.90
   2   7   4   11.00    3.80
  -2  -7   4    8.50    3.30
   7  -2   4    5.00    2.90
  -3  -7  -4   -5.30    5.50
   7  -3  -4    4.40    4.70
   3   7  -4    6.90    3.20
  -7   3   4    3.70    2.80
   7  -3   4    7.70    3.10
  -3  -7   4    3.00    3.50
  -4  -7  -4   81.69   11.50
   4   7  -4   92.79    7.80
   7  -4  -4   90.99   10.40
   7  -4   4   91.39    6.50
  -7   4   4   76.19    7.20
  -4  -7   4  105.59    8.50
   5   7  -4    5.10    3.20
   7  -5  -4   10.20    5.00
  -5  -7   4    3.30    3.20
   7  -5   4    2.30    2.30
  -7   5   4    3.90    2.80
  -6  -7  -4   65.39   11.70
   6   7  -4   82.79    7.30
   7  -6  -4   53.89    8.70
  -7   6   4   68.19    6.90
   7  -6   4   58.09    5.30
   7  -7  -4   91.69   11.10
   7   7  -4   97.09    8.80
  -7  -7  -4  106.59   13.60
  -7   7   4  105.79    8.40
   7  -7   4  102.69    6.20
  -7  -7   4  109.39    9.50
   7  -8  -4    7.60    5.60
   8   7  -4   17.90    4.30
   7  -8   4    8.60    2.30
   8   7   4   10.00    4.70
   7  -8   4    7.90    2.80
  -8  -7   4   11.90    4.30
  -7   8   4   10.40    3.80
   8   6  -4    5.30    3.40
   6  -8  -4    2.80    5.40
   6  -8   4   -0.30    1.70
   8   6   4    0.30    3.90
  -6   8   4   12.60    3.20
  -8  -6   4    6.50    3.40
   5  -8  -4   12.40    6.60
   5  -8   4    8.90    2.60
   5  -8   4   10.60    2.00
  -5   8   4    7.60    3.30
   8   5   4    9.40    4.50
  -8  -5   4   11.00    4.60
   8   5   4   12.60    3.00
   4  -8  -4   13.50    6.20
   8   4  -4   24.20    5.20
  -4   8   4   22.10    4.40
   4  -8   4   15.40    2.10
   8   4   4   15.80    4.80
   8   4   4   14.90    3.10
  -8  -4   4   18.20    4.80
   8   3  -4   97.99    9.50
   3  -8  -4  110.69   11.80
   8   3   4   89.19    8.40
   3  -8   4   91.29    4.90
  -3   8   4   90.99    8.30
   3  -8   4   87.09    7.10
   3  -8   4   86.69    7.00
  -8  -3   4  102.09    8.70
   8   2  -4    3.70    4.00
   2  -8  -4    1.90    5.40
  -8  -2   4    4.70    3.10
   2  -8   4    3.50    3.20
  -2   8   4   -5.10    3.20
   2  -8   4    2.80    2.70
   8   2   4    0.00    3.40
   8   1  -4   33.80    6.20
   1  -8  -4   33.50    8.70
   1  -8   4   52.69    7.50
   1  -8   4   39.20    5.20
   8   1   4   59.89    7.20
  -1   8   4   40.60    6.00
   0  -8  -4   -8.30    6.20
   8   0  -4    7.20    4.20
   0   8   4    4.30    3.20
  -8   0   4    5.50    2.90
   8   0   4    6.30    3.80
  -1  -8  -4  113.99    9.20
  -1  -8  -4   97.69   13.30
   8  -1   4  140.79    9.20
  -8   1   4  100.29    8.50
  -1  -8   4  118.79    8.90
  -1  -8   4  111.39    8.80
   1   8   4  110.09    9.30
   8  -2  -4    0.60    4.40
  -2  -8  -4    2.30    6.00
  -2  -8  -4    6.10    3.40
   2   8   4   -2.60    3.40
  -2  -8   4    6.50    3.20
   3   8  -4   36.20    4.70
  -3  -8  -4   25.20    8.00
  -8   3   4   31.10    4.90
  -3  -8   4   34.60    5.30
   8  -4  -4   -1.40    4.40
  -4  -8  -4    9.20    6.80
  -8   4   4    0.50    2.60
  -4  -8   4    4.00    3.20
  -5  -8  -4   20.00    7.70
   8  -5  -4    7.20    5.40
  -5  -8   4   20.50    4.60
   8  -5   4   15.40    3.20
  -8   5   4   12.00    4.00
   6   8  -4   -2.50    2.70
  -6  -8  -4   -6.90    6.60
   8  -6  -4    2.40    4.40
  -6  -8   4    3.10    3.40
  -8   6   4   -1.40    2.70
  -7  -8  -4   -0.60    6.70
   8  -7  -4    0.20    4.60
   7   8  -4    8.80    3.40
  -8   7   4    1.90    2.90
   8  -7   4    6.80    2.20
  -7  -8   4    7.20    3.90
   8   8  -4    7.90    3.40
   8  -8  -4    0.70    5.00
   8   8   4   -1.30    3.90
   8  -8   4   -0.60    1.80
  -8   8   4    2.60    2.90
  -8  -8   4   -0.80    3.00
   9   8  -4    3.70    3.10
  -9  -8   4    1.10    3.10
  -8   9   4   14.90    3.90
   8  -9   4    0.10    2.00
   9   8   4   -2.70    3.60
   7  -9  -4   26.70    7.60
   9   7  -4   36.10    5.60
  -9  -7   4   27.70    5.90
  -7   9   4   25.90    5.20
   9   7   4   22.70    5.50
  -6   9   4   60.39    7.10
   5  -9  -4  419.76   24.50
   9   5  -4  397.96   21.40
  -5   9   4  449.56   21.20
   9   5   4  410.66   20.90
   5  -9   4  436.26   19.40
  -9  -5   4  454.55   22.70
   9   5   4  407.46   21.50
   4  -9  -4   23.80    7.70
   9   4   4   30.80    5.80
  -4   9   4   31.60    5.50
   9   4   4   29.60    4.30
  -9  -4   4   35.50    6.30
   4  -9   4   47.40    5.20
   3  -9  -4  115.99   12.90
   9   3  -4  141.29   11.20
  -3   9   4  132.59    9.80
   3  -9   4  125.49    8.60
   3  -9   4  122.09    8.90
   9   3   4  132.09    9.90
  -9  -3   4  130.49   10.20
   9   2  -4   -0.70    4.20
   2  -9  -4   -1.70    5.60
   2  -9   4    1.10    2.70
  -9  -2   4    1.40    3.00
   2  -9   4   -0.80    3.40
   9   2   4    3.10    3.30
  -2   9   4    5.30    3.70
   9   1  -4  385.66   20.60
   1  -9   4  353.46   18.80
   1  -9   4  353.26   18.00
   9   1   4  369.26   18.50
  -9  -1   4  397.76   19.40
   9   0  -4    0.60    4.40
   0  -9  -4   -6.50    6.40
   0  -9   4    1.00    3.80
  -9   0   4    6.30    3.40
   9   0   4    4.20    3.40
   0   9   4    4.20    3.60
  -1  -9  -4  493.95   27.70
   9  -1  -4  461.35   24.80
  -9   1   4  489.65   23.50
  -1  -9   4  493.55   22.90
   1   9   4  500.85   23.90
  -1  -9   4  501.45   23.30
   9  -1   4  485.95   22.60
  -2  -9  -4   47.30    9.70
   9  -2  -4   44.20    7.70
   2   9   4   63.89    7.80
   9  -2   4   48.60    6.20
  -9   2   4   43.80    6.30
  -2  -9   4   46.40    6.80
   9  -3  -4  181.28   14.50
  -3  -9  -4  216.98   17.10
   9  -3   4  200.88   11.20
  -9   3   4  199.28   12.30
  -4  -9  -4  123.39   13.80
   9  -4  -4   77.89   10.50
  -9   4   4   61.39    7.30
   9  -4   4   76.29    6.50
  -4  -9   4   74.29    8.70
   9  -5  -4  747.23   36.10
  -5  -9  -4  751.72   38.50
  -9   5   4  759.32   33.70
  -5  -9   4  773.62   34.60
   9  -5   4  765.12   31.80
   9  -6  -4   23.30    6.40
  -6  -9  -4   18.00    8.50
  -6  -9   4   18.70    5.00
   9  -6   4   28.50    3.70
  -9   6   4   19.10    4.30
   9  -7  -4  151.38   13.60
  -7  -9  -4  157.88   16.60
  -7  -9   4  158.28   12.20
   9  -7   4  161.88    8.60
  -9   7   4  159.18   11.00
   9  -8  -4    6.70    5.10
  -9   8   4   -1.00    2.90
  -8  -9   4    1.60    3.20
   8   9   4   -3.60    3.80
   9  -8   4    3.20    2.00
   9  -9  -4    2.00    5.20
   9   9   4    2.20    4.30
  -9   9   4    1.20    3.10
  -9  -9   4    1.60    3.50
   9  -9   4    8.00    2.50
   9 -10  -4   11.50    6.70
  -9  10   4   12.60    4.70
  10   9   4   17.80    5.40
 -10  -9   4   11.80    4.80
   8 -10  -4    0.60    5.50
  10   8  -4    3.00    3.10
  10   8   4   -4.20    3.70
 -10  -8   4   -0.20    3.50
  -8  10   4   -1.00    3.00
   7 -10  -4    5.10    5.50
  10   7  -4   10.30    4.10
  10   7   4   10.60    4.70
  -7  10   4    9.10    4.00
 -10  -7   4   10.10    4.70
  10   6  -4   20.60    5.50
   6 -10  -4   16.80    6.60
  -6  10   4   19.70    4.90
 -10  -6   4   24.90    5.90
  10   6   4   26.00    5.60
  10   5  -4   12.30    4.90
   5 -10  -4    7.30    6.00
  10   5   4   13.80    4.90
  -5  10   4   15.00    4.20
 -10  -5   4   19.80    4.60
   4 -10  -4   -4.20    4.90
  10   4  -4   -0.20    3.80
 -10  -4   4   -0.20    3.00
  -4  10   4    1.90    2.90
  10   4   4    0.30    3.30
  10   3  -4   -3.70    3.70
   3 -10  -4   -0.80    5.00
  10   3   4   -3.10    2.80
   3 -10   4   -3.90    2.70
  10   3   4   -0.50    2.30
 -10  -3   4    0.20    3.00
  -3  10   4    2.40    3.10
  -2  10   4    8.10    3.50
   1 -10  -4   33.60    8.50
  10   1  -4   30.70    6.70
   1 -10   4   41.10    7.20
 -10  -1   4   26.70    5.00
  -1  10   4   25.40    5.50
  10   1   4   26.10    5.10
  10   0  -4    7.60    4.60
   0 -10  -4    7.60    6.60
  10   0   4    0.20    3.50
   0 -10   4    2.70    4.50
 -10   0   4    3.50    3.30
   0  10   4   13.10    3.90
  -1 -10  -4   14.10    6.70
  10  -1  -4   -7.40    4.30
  10  -1   4   -6.30    2.80
 -10   1   4   -0.10    2.80
   1  10   4   -0.60    4.00
  10  -2  -4    0.10    4.60
  -2 -10  -4   -5.20    5.40
  10  -2   4   -0.50    2.60
  -2 -10   4   -0.80    3.10
 -10   2   4   -1.40    2.80
   2  10   4   -2.90    3.90
  -3 -10  -4   63.19   10.30
  10  -3  -4   61.79    8.80
 -10   3   4   56.49    6.90
  -3 -10   4   61.79    8.20
  10  -3   4   64.39    6.30
  10  -4  -4    1.50    4.50
  -4 -10  -4   18.80    7.70
  -4 -10   4    7.00    3.70
  10  -4   4    5.00    2.70
 -10   4   4    2.10    3.10
  10  -5  -4   -2.40    5.00
  -5 -10  -4    4.20    6.90
  10  -5   4    1.60    2.40
  -5 -10   4   10.60    4.40
 -10   5   4    2.20    2.80
  -6 -10  -4   -7.90    6.80
  10  -6  -4   -5.00    4.50
  10  -6   4    3.50    2.40
 -10   6   4   -0.50    2.70
  -6 -10   4    0.70    3.50
  -7 -10  -4   37.60    9.50
  10  -7  -4   27.10    7.40
  10  -7   4   38.60    4.40
 -10   7   4   28.20    5.60
  -7 -10   4   35.00    6.70
  10  -8  -4   15.70    6.70
  -8 -10   4   17.50    5.20
   8  10   4   12.40    5.30
  10  -8   4   14.30    2.90
 -10   8   4   15.20    4.40
  10  -9  -4   -3.00    4.90
 -10   9   4   -0.10    3.00
  -9 -10   4    3.40    3.50
   9  10   4   -3.80    4.10
  10  -9   4    1.20    2.20
  10 -10  -4    5.70    6.00
 -10 -10   4    5.50    4.20
 -10  10   4   -0.70    3.40
  10  10   4    6.50    4.80
  10 -11  -4   -2.40    5.60
 -10  11   4   -1.40    3.20
 -11 -10   4    3.50    4.20
  11  10   4    3.60    4.50
   9 -11  -4   41.30    9.00
 -11  -9   4   50.29    8.30
  11   9   4   51.29    7.70
  -9  11   4   35.50    6.60
  11   8  -4    1.10    3.80
   8 -11  -4    5.60    6.40
 -11  -8   4    7.90    5.00
  11   8   4    3.80    4.50
  -8  11   4    7.90    4.40
   7 -11  -4  153.48   15.30
 -11  -7   4  166.58   13.70
  -7  11   4  150.48   11.70
  11   7   4  152.78   11.80
  11   6  -4   38.50    7.10
   6 -11  -4   45.90    9.30
 -11  -6   4   51.79    8.10
  -6  11   4   61.99    7.80
  11   6   4   50.49    7.10
  11   5  -4  130.69   12.10
   5 -11  -4  146.49   14.60
  -5  11   4  157.48   11.80
  11   5   4  166.28   11.70
 -11  -5   4  166.38   12.40
   4 -11  -4   25.40    7.60
  11   4  -4   22.70    6.30
  11   4   4   25.20    5.40
  -4  11   4   34.30    6.40
 -11  -4   4   30.40    5.70
   3 -11  -4    2.20    6.10
  11   3  -4   14.50    5.80
  -3  11   4   15.50    4.90
   3 -11   4   20.70    4.90
 -11  -3   4   16.60    4.50
  11   3   4   16.50    4.50
   2 -11  -4   30.30    8.60
  11   2  -4   30.20    6.80
   2 -11   4   28.00    5.80
  -2  11   4   34.20    6.00
 -11  -2   4   30.80    5.50
  11   2   4   29.00    5.50
   1 -11  -4    9.60    6.10
  11   1  -4    6.70    5.00
   1 -11   4    6.70    5.00
  11   1   4    3.20    3.30
 -11  -1   4    4.80    3.20
  -1  11   4   10.40    4.20
  11   0  -4   23.90    6.30
   0 -11  -4   31.50    7.90
   0 -11   4   29.50    7.30
   0  11   4   23.00    5.50
 -11   0   4   25.90    5.30
  11   0   4   18.80    4.40
  11  -1  -4   -0.50    4.20
  -1 -11  -4    1.50    5.60
  11  -1   4   -1.30    2.80
  -1 -11   4   -1.70    3.60
 -11   1   4    1.20    2.80
   1  11   4    3.40    4.00
  -2 -11  -4   -1.20    5.80
  11  -2  -4    2.80    4.60
  11  -2   4    0.70    2.80
 -11   2   4    3.40    3.20
  -2 -11   4    7.80    3.80
  11  -3  -4   35.80    7.30
  -3 -11  -4   47.50    9.90
  -3 -11   4   35.20    6.30
  11  -3   4   34.90    4.90
 -11   3   4   33.60    5.80
  11  -4  -4    0.00    5.00
  -4 -11  -4   28.10    8.30
  11  -4   4   -1.40    2.30
 -11   4   4   -2.60    2.70
  -4 -11   4   -0.70    3.60
  -5 -11  -4  409.36   25.60
  11  -5  -4  371.66   22.60
  -5 -11   4  376.96   21.60
  11  -5   4  416.46   18.50
 -11   5   4  415.76   20.80
  11  -6  -4   11.50    5.90
  -6 -11  -4    5.10    7.60
  -6 -11   4    6.60    4.20
 -11   6   4    8.80    3.60
  11  -6   4   10.30    3.00
  11  -7  -4  127.39   13.60
  -7 -11  -4  139.29   16.80
  -7 -11   4  167.38   13.10
  11  -7   4  145.99    8.70
 -11   7   4  147.59   11.20
  11  -8  -4   48.30    9.30
 -11   8   4   49.10    7.20
   8  11   4   67.29    8.90
  11  -8   4   49.50    5.10
  -8 -11   4   58.89    8.80
  11  -9  -4   66.59   10.60
 -11   9   4   74.29    8.60
  11  -9   4   79.89    6.40
   9  11   4   75.29    9.40
  -9 -11   4   85.99   10.10
  11 -10  -4    5.60    6.10
 -11  10   4    7.90    4.00
  10  11   4    2.00    4.80
 -10 -11   4   11.00    5.00
  11 -11  -4  210.68   18.10
  11  11   4  216.28   15.30
 -11  11   4  234.18   15.70
  11 -12  -4   11.90    7.10
  12  11   4   12.90    5.40
  10 -12  -4   -7.90    5.30
  12  10   4   13.30    5.90
 -10  12   4   -0.90    3.70
   9 -12  -4    9.50    7.00
  -9  12   4   13.90    4.80
 -12  -9   4   20.90    6.50
  12   8  -4   -4.80    3.40
   8 -12  -4    0.80    6.10
  -8  12   4    7.60    4.20
  12   8   4   29.40    6.30
 -12  -8   4    4.00    4.90
   7 -12  -4    0.40    6.10
  12   7  -4   -5.80    3.90
  12   7   4   12.70    5.10
 -12  -7   4    4.10    4.80
  -7  12   4   -0.20    3.60
  12   6  -4   17.10    5.30
   6 -12  -4   10.50    6.50
  -6  12   4    7.20    4.50
  12   6   4    9.60    4.90
 -12  -6   4    8.00    4.40
  12   5  -4   20.50    6.80
   5 -12  -4   29.80    8.50
  -5  12   4   44.90    7.10
 -12  -5   4   33.60    6.50
  12   4  -4    3.80    4.90
   4 -12  -4    5.70    6.30
   4 -12   4    5.20    3.80
  12   4   4   18.00    4.50
 -12  -4   4    6.00    3.70
   3 -12  -4   -5.60    5.30
  12   3  -4   -4.30    4.20
  -3  12   4   -1.80    3.30
   3 -12   4    4.90    3.50
 -12  -3   4    0.10    3.10
  12   3   4    5.10    3.20
   2 -12  -4   -5.10    5.70
  12   2  -4   -4.90    3.70
  -2  12   4   -0.50    3.60
   2 -12   4   -2.90    3.10
 -12  -2   4   -1.20    2.90
  12   2   4   -1.10    3.30
   1 -12  -4    1.70    6.10
  12   1  -4   -3.90    4.00
  12   1   4    2.20    3.30
  -1  12   4   -3.50    3.50
 -12  -1   4    0.80    3.00
   1 -12   4   -4.10    3.90
   0 -12  -4    8.90    6.80
  12   0  -4   -0.80    4.40
   0 -12   4   -0.60    4.70
 -12   0   4    1.20    3.20
   0  12   4    0.60    4.00
  12   0   4    2.50    3.20
  12  -1  -4   -2.30    4.30
  -1 -12   4   13.70    4.80
  12  -2  -4   -8.80    4.10
  -2 -12  -4    2.80    6.50
  12  -2   4   -5.80    2.50
 -12   2   4   -2.30    2.60
  -2 -12   4    6.80    3.50
  -3 -12  -4    1.40    6.80
  12  -3  -4   -5.90    4.10
 -12   3   4    0.10    2.90
  12  -3   4   -1.20    2.60
  -3 -12   4    0.80    3.40
  -4 -12  -4   -0.20    7.20
  12  -4  -4   -4.10    4.50
  12  -4   4    0.30    2.60
  -4 -12   4   -2.90    3.50
 -12   4   4   -1.10    2.90
  12  -5  -4    1.60    5.10
  -5 -12  -4  -11.50    6.90
  12  -5   4    0.80    2.60
  -5 -12   4    5.10    4.20
 -12   5   4    2.90    3.30
  12  -6  -4   -2.50    4.80
  -6 -12  -4    0.10    7.60
 -12   6   4   -1.10    2.90
  12  -6   4   -1.60    2.30
  -6 -12   4    2.80    4.70
  12  -7  -4   26.60    7.30
  -7 -12  -4   -5.00    7.60
 -12   7   4    7.50    3.60
  -7 -12   4    1.30    3.90
  12  -7   4    1.10    2.40
  12  -8  -4    9.90    6.00
 -12   8   4    5.40    3.50
  -8 -12   4    1.20    4.00
  12  -8   4    1.90    2.40
   8  12   4    2.50    4.90
  12  -9  -4    1.00    5.70
   9  12   4   -1.00    4.60
 -12   9   4    6.60    4.10
  12  -9   4    3.40    2.90
  12 -10  -4   -2.60    5.80
 -12  10   4   -4.90    2.90
  10  12   4    0.00    4.90
  12 -11  -4   -0.90    6.30
  11  12   4    9.90    5.10
  12 -12  -4    4.50    6.70
  12  12   4   13.20    5.80
  12 -13  -4   -2.40    6.50
  13  12   4    2.40    4.70
  11 -13  -4   17.60    7.70
  13  11   4   13.50    5.90
  10 -13  -4   -2.00    6.50
  13  10   4    4.40    4.70
   9 -13  -4   27.90    9.20
  -9  13   4   28.10    6.30
  13   9   4   19.50    6.30
  13   8  -4   -2.30    4.10
   8 -13  -4    5.00    6.80
 -13  -8   4    6.60    5.40
  13   8   4    4.40    4.50
  -8  13   4    4.40    4.10
   7 -13  -4  294.77   21.60
 -13  -7   4  302.57   19.40
  -7  13   4  323.27   19.20
  13   7   4  315.97   18.10
  13   6  -4    0.40    4.30
   6 -13  -4   -2.00    6.00
  13   6   4    3.80    4.20
 -13  -6   4    0.20    3.90
  -6  13   4    3.70    4.30
   5 -13  -4  492.75   28.90
  13   5  -4  455.65   25.80
  -5  13   4  516.75   25.70
 -13  -5   4  497.45   26.00
  13   5   4  472.15   24.30
  13   4  -4   25.10    7.00
   4 -13  -4    1.50    6.60
  13   4   4    7.30    4.10
  -4  13   4    8.40    4.60
 -13  -4   4    4.00    3.80
  13   3  -4   -0.80    4.60
   3 -13  -4   -1.90    6.10
 -13  -3   4    1.30    3.30
  -3  13   4    3.60    4.10
   3 -13   4   -1.40    3.80
  13   3   4    3.20    3.80
   2 -13  -4   -3.80    5.60
  13   2  -4   -1.60    4.40
 -13  -2   4    1.40    3.20
  -2  13   4    1.80    4.00
   2 -13   4    3.80    4.00
  13   2   4    0.60    3.70
  13   1  -4  185.28   14.80
   1 -13  -4  214.08   17.70
 -13  -1   4  200.38   13.90
  13   1   4  188.98   12.40
   1 -13   4  192.98   14.30
  -1  13   4  198.48   14.50
  13   0  -4   -3.30    5.10
   0 -13  -4   11.30    7.10
  13   0   4   -0.10    3.50
   0 -13   4   12.40    6.60
   0  13   4    9.80    5.30
 -13   0   4    6.20    3.90
  -1 -13  -4   68.19   11.70
  13  -1  -4   67.39   10.00
 -13   1   4   93.19    9.10
   1  13   4   77.49   10.80
  13  -1   4   69.69    7.50
  -1 -13   4   83.39   10.40
  -2 -13  -4    3.40    6.70
  13  -2  -4    0.50    5.20
  -2 -13   4    4.70    4.50
  13  -2   4    4.60    3.40
 -13   2   4    7.20    3.70
  13  -3  -4   12.60    6.20
  -3 -13  -4   17.20    8.70
 -13   3   4   20.40    5.10
  13  -3   4   24.60    4.60
  -3 -13   4   21.40    5.30
  13  -4  -4   51.89    9.40
  -4 -13  -4   43.10   11.40
 -13   4   4   49.40    7.30
  13  -4   4   62.59    6.50
  -4 -13   4   72.59    9.80
  13  -5  -4   94.19   11.80
  -5 -13  -4   79.59   14.00
  -5 -13   4  109.19   11.10
 -13   5   4   96.29    9.30
  13  -5   4   86.19    7.30
  13  -6  -4   31.70    7.70
  -6 -13  -4   27.70   10.30
  13  -6   4   26.70    4.30
 -13   6   4   31.30    5.90
  -6 -13   4   38.50    8.30
  13  -7  -4   18.00    7.30
  -7 -13  -4   21.90    9.90
  13  -7   4   22.90    4.00
 -13   7   4   32.10    6.20
  13  -8  -4   20.90    7.40
 -13   8   4    1.30    3.60
   8  13   4    6.10    5.10
  13  -8   4    1.70    2.70
  13  -9  -4    4.50    6.10
   9  13   4    9.80    5.30
  13  -9   4    7.80    3.30
 -13   9   4    7.10    4.50
  13 -10  -4    6.20    6.60
  10  13   4    4.90    5.00
  13 -11  -4    0.70    6.20
  11  13   4    9.30    5.30
  13 -12  -4    7.60    7.80
  12  13   4   18.90    5.90
  13 -13  -4    1.70    6.90
  13  13   4    5.40    5.40
  13 -14  -4   -3.20    7.10
  14  13   4   -1.00    4.50
  12 -14  -4    1.50    7.10
  14  12   4    3.30    4.70
  11 -14  -4   12.90    8.00
  14  11   4   14.10    5.70
  10 -14  -4    4.50    7.20
  14  10   4   -3.80    4.30
   9 -14  -4    2.30    6.70
  14   9   4    3.20    4.90
  14   8  -4    1.40    4.80
   8 -14  -4    7.00    7.10
  14   8   4    4.90    4.80
  -8  14   4   16.10    5.90
  14   7  -4   18.70    6.40
   7 -14  -4   36.50    9.80
  14   7   4   34.10    7.00
  -7  14   4   35.00    7.20
 -14  -7   4   31.40    7.30
   6 -14  -4    6.50    6.90
  14   6  -4   18.50    6.30
  -6  14   4    4.40    4.70
  14   6   4    4.10    4.60
 -14  -6   4    2.80    3.90
   5 -14  -4    0.10    6.60
  14   5  -4   -4.20    4.20
 -14  -5   4   -2.90    3.40
  -5  14   4    2.90    3.90
  14   5   4   -2.10    3.70
  14   4  -4    1.30    5.10
   4 -14  -4   -2.60    6.10
  14   4   4    6.50    4.10
 -14  -4   4    1.20    3.70
  -4  14   4   -2.70    3.70
  14   3  -4   21.50    6.60
   3 -14  -4   20.20    8.90
  14   3   4   27.20    5.60
  -3  14   4   22.40    6.30
 -14  -3   4   24.90    6.20
   2 -14  -4  -10.70    5.90
  14   2  -4   -6.20    4.70
  -2  14   4    0.80    4.30
 -14  -2   4   -0.70    3.20
  14   2   4    2.50    3.70
  14   1  -4    4.20    5.50
   1 -14  -4   -3.10    6.50
  -1  14   4    5.40    5.50
 -14  -1   4    5.40    4.20
  14   1   4    2.30    3.40
   0 -14  -4    3.70    6.50
  14   0  -4   -5.70    5.30
   0  14   4    1.30    4.90
 -14   0   4   -1.70    3.40
  14   0   4   -1.70    3.30
  -1 -14  -4    6.00    6.90
  14  -1  -4    5.50    6.20
  14  -1   4    3.10    3.50
 -14   1   4    6.20    3.90
  14  -2  -4   -4.00    5.30
 -14   2   4    0.40    3.10
  14  -2   4    1.30    3.30
  14  -3  -4    6.90    6.30
  -3 -14  -4    7.80    8.30
  14  -3   4    7.70    3.70
 -14   3   4    9.50    4.00
  -4 -14  -4   11.80    8.70
  14  -4  -4    3.70    5.70
 -14   4   4    3.90    3.90
  14  -4   4    0.60    3.10
  -5 -14  -4   10.70    8.90
  14  -5  -4    8.00    6.40
  14  -5   4    9.80    3.40
 -14   5   4    9.30    4.10
  -6 -14  -4    2.80    8.60
  14  -6  -4   -1.10    5.50
  14  -6   4    2.00    2.80
 -14   6   4    2.10    3.60
  14  -7  -4    5.60    6.20
  14  -7   4   10.70    3.40
 -14   7   4   11.60    4.80
  14  -8  -4    1.10    6.10
   8  14   4    7.00    5.20
  14  -8   4    6.00    3.10
  14  -9  -4   -1.90    5.90
   9  14   4    5.10    4.90
  14  -9   4    5.90    4.90
  14 -10  -4   -4.20    5.90
  10  14   4   -0.40    4.50
  14 -11  -4   -1.80    6.00
  11  14   4    2.70    4.80
  14 -12  -4   -3.60    6.20
  12  14   4    5.90    5.30
  14 -13  -4   -3.40    7.10
  13  14   4   -5.00    5.00
  14 -14  -4   -5.00    6.60
  14  14   4   -0.80    4.70
  14 -15  -4    0.60    7.60
  15  14   4   -0.10    4.90
  13 -15  -4   71.49   13.40
  15  13   4   69.99    9.90
  12 -15  -4   11.90    9.00
  15  12   4   18.10    6.30
  11 -15  -4   96.39   14.60
  15  11   4  115.89   11.40
  10 -15  -4   -0.60    6.70
  15  10   4    0.30    4.30
   9 -15  -4   14.50    7.90
  15   9   4    6.70    5.00
  15   8  -4   21.80    7.10
   8 -15  -4   40.40   10.10
  15   8   4   26.50    6.50
  15   7  -4   20.10    6.90
   7 -15  -4   27.20    9.30
  15   7   4   37.10    7.00
   6 -15  -4    4.80    7.10
  15   6  -4    4.40    5.60
  15   6   4   10.50    4.90
 -15  -6   4   10.30    5.80
  15   5  -4   27.00    7.40
   5 -15  -4   26.60    9.00
  -5  15   4   23.90    7.50
  15   5   4   31.00    6.50
 -15  -5   4   26.10    6.60
  15   4  -4   -0.20    5.10
   4 -15  -4    0.40    6.40
 -15  -4   4   -1.90    3.40
  -4  15   4    1.80    4.20
  15   4   4   -0.10    3.80
   3 -15  -4   -4.10    6.10
  15   3  -4    1.00    5.30
 -15  -3   4    2.50    3.80
  -3  15   4   -2.30    4.00
  15   3   4    1.80    4.00
   2 -15  -4   -5.90    5.90
  15   2  -4    2.60    5.90
 -15  -2   4   -1.50    3.10
  -2  15   4   -0.40    5.10
  15   2   4    4.60    3.90
  15   1  -4  155.48   14.60
   1 -15  -4  165.98   17.00
  -1  15   4  159.38   15.40
 -15  -1   4  167.68   13.30
  15   1   4  151.38   11.30
  15   0  -4    6.10    6.10
   0 -15  -4   17.30    8.20
   0  15   4    3.10    5.50
  15   0   4   -1.50    3.30
 -15   0   4    2.60    3.70
  15  -1  -4   46.90    9.00
  -1 -15  -4   34.70    9.90
 -15   1   4   58.49    8.50
  15  -1   4   51.39    6.70
  15  -2  -4   -7.50    5.10
  -2 -15  -4    1.00    7.60
  15  -2   4   -3.50    3.20
 -15   2   4    2.70    3.80
  15  -3  -4  108.59   12.90
  -3 -15  -4  114.89   15.60
  15  -3   4  111.09    9.10
 -15   3   4  115.29   10.70
  15  -4  -4   22.00    7.70
  -4 -15  -4   23.80    9.80
  15  -4   4   31.00    5.10
 -15   4   4   23.80    5.90
  15  -5  -4  500.45   28.90
  -5 -15  -4  486.55   31.60
 -15   5   4  513.85   30.50
  15  -5   4  529.15   23.50
  15  -6  -4   -3.70    5.50
  -6 -15  -4   -3.30    8.40
  15  -6   4    2.70    3.10
  15  -7  -4   47.80   10.40
  15  -7   4   47.80    6.20
   7  15   4   68.69    9.40
  15  -8  -4   21.90    8.20
  15  -8   4   20.40    4.30
   8  15   4   21.70    6.60
  15  -9  -4  123.89   15.40
   9  15   4  129.79   12.40
  15 -10  -4    5.40    6.90
  10  15   4    7.90    5.30
  15 -11  -4   26.30    9.50
  11  15   4   46.20    8.70
  15 -12  -4   -4.70    6.70
  12  15   4   -0.10    5.40
  15 -13  -4   12.40    8.00
  13  15   4    8.80    5.90
  15 -14  -4    5.00    7.90
  14  15   4   -3.10    4.70
  13 -16  -4   -1.00    7.20
  16  13   4   -1.20    4.90
  12 -16  -4   -2.60    7.80
  16  12   4    0.10    4.80
  11 -16  -4    7.80    7.80
  16  11   4   11.30    5.70
  10 -16  -4   -0.90    7.10
  16  10   4   -0.50    4.50
   9 -16  -4    2.10    7.60
  16   9   4    5.20    4.80
   8 -16  -4    9.00    7.80
  16   8  -4    0.00    5.10
  16   8   4    4.60    4.80
   7 -16  -4   27.30    9.20
  16   7  -4   15.30    7.50
  16   7   4   20.70    6.30
  16   6  -4   -7.20    5.50
   6 -16  -4    8.40    8.00
  16   6   4    2.10    4.40
   5 -16  -4   10.30    8.10
  16   5  -4   15.30    6.80
  16   5   4    6.30    4.80
  16   4  -4   -1.00    5.30
   4 -16  -4   -3.70    6.60
  16   4   4    0.00    3.80
   3 -16  -4   23.30    8.90
  16   3  -4   20.60    7.20
 -16  -3   4   26.00    9.40
  16   3   4   15.60    5.30
  16   2  -4   -1.40    5.60
   2 -16  -4   -5.90    6.30
  16   2   4   -1.90    3.60
 -16  -2   4   -2.10    4.40
  16   1  -4   -0.40    6.20
   1 -16  -4   -4.00    6.70
  16   1   4    7.30    4.00
 -16  -1   4    4.90    5.10
   0 -16  -4   -8.30    6.40
  16   0  -4    4.60    6.40
  16   0   4   -0.90    3.50
 -16   0   4    2.50    5.30
  16  -1  -4   -8.00    5.30
  -1 -16  -4    6.30    7.50
  16  -1   4   -0.80    3.20
  -2 -16  -4    5.70    8.20
  16  -2  -4    1.90    5.80
  16  -2   4    6.30    4.10
  16  -3  -4    6.70    6.20
  -3 -16  -4   -0.20    7.90
  16  -3   4   -1.50    3.30
  16  -4  -4   -1.00    5.60
  -4 -16  -4   -2.10    7.80
  16  -4   4    4.10    3.60
  -5 -16  -4    3.90    8.70
  16  -5  -4    1.00    6.00
  16  -5   4    3.50    3.60
  16  -6  -4   -0.50    6.00
  -6 -16  -4   44.10   11.20
  16  -7  -4    0.90    6.10
  16  -7   4   -0.90    3.30
   7  16   4    9.60    5.70
  16  -8  -4    6.20    6.60
   8  16   4    6.80    5.60
  16  -8   4    6.40    3.60
  16  -9  -4    9.40    7.70
   9  16   4   12.40    6.20
  16 -10  -4   -6.70    5.70
  10  16   4   -1.00    5.30
  16 -11  -4   -1.50    6.60
  11  16   4    1.50    5.40
  16 -12  -4   -2.40    6.60
  12  16   4   -2.40    5.10
  16 -13  -4   10.00    8.30
  13  16   4    6.40    5.90
  11 -17  -4   55.89   12.50
  17  11   4   55.99    8.90
  10 -17  -4    5.40    8.60
  17  10   4    3.10    5.10
   9 -17  -4   87.19   14.50
  17   9   4   85.39   10.60
  17   8  -4   29.80    8.60
   8 -17  -4   21.40    9.30
  17   8   4   37.00    7.60
  17   7  -4  402.16   25.70
   7 -17  -4  461.35   29.70
  17   7   4  461.45   24.00
  17   6  -4    0.70    5.90
   6 -17  -4    2.20    7.80
  17   6   4    9.20    4.90
  17   5  -4   13.70    7.30
   5 -17  -4   18.90    8.80
  17   5   4   22.50    5.90
  17   4  -4   16.20    7.20
   4 -17  -4   10.50    8.60
  17   4   4   16.80    5.40
  17   3  -4   84.09   11.90
   3 -17  -4   83.49   13.70
  17   3   4   74.99    8.90
   2 -17  -4   -0.10    8.00
  17   2  -4    4.60    6.00
  17   2   4    8.10    4.50
  17   1  -4   -4.90    5.50
   1 -17  -4   -3.50    7.40
  17   1   4   -3.50    3.30
   0 -17  -4   -1.90    7.60
  17   0  -4   -6.10    5.40
  17   0   4    3.00    3.60
  17  -1  -4   -1.70    5.80
  -1 -17  -4    1.00    8.30
  17  -1   4    0.60    3.60
  17  -2  -4   12.50    7.50
  -2 -17  -4   11.00    9.40
  17  -2   4    5.80    3.90
  17  -3  -4   16.00    7.60
  -3 -17  -4   23.40   10.40
  17  -3   4   22.90    5.00
  17  -4  -4    3.90    6.70
  -4 -17  -4   14.20   10.00
  17  -4   4   11.80    4.30
  17  -5  -4   47.40    9.70
  -5 -17  -4   28.90   10.90
  17  -5   4   33.10    5.60
  17  -6  -4   -2.90    6.20
  17  -6   4    0.00    3.30
  17  -7  -4   -7.70    5.30
   7  17   4   -2.80    4.40
  17  -7   4    2.20    3.50
  17  -8  -4    0.90    7.00
   8  17   4   -0.20    5.50
  17  -8   4    1.10    3.60
  17  -9  -4   87.69   13.70
   9  17   4  117.89   12.60
  17 -10  -4    2.20    6.90
  10  17   4    6.10    5.70
  17 -11  -4   50.99   11.60
  11  17   4   64.09   10.00
  10 -18  -4    5.20    8.80
  18  10   4    8.50    5.70
   9 -18  -4    4.40    8.90
  18   9   4    5.50    5.20
   8 -18  -4    3.60    7.70
  18   8   4    4.00    4.90
   7 -18  -4    3.00    8.00
  18   7  -4    9.30    6.80
  18   7   4    3.70    4.90
  18   6  -4   -2.80    6.10
   6 -18  -4    2.40    8.20
  18   6   4    1.30    4.70
   5 -18  -4   11.30    9.00
  18   5  -4   19.70    7.80
  18   5   4   19.80    5.70
  18   4  -4    7.40    6.70
   4 -18  -4    6.90    8.10
  18   4   4   10.50    4.80
  18   3  -4    1.90    6.30
   3 -18  -4    5.70    8.40
  18   3   4   -1.00    4.10
   2 -18  -4   -8.50    7.50
  18   2  -4    0.80    5.90
  18   2   4    2.00    3.90
  18   1  -4   12.80    7.50
   1 -18  -4   12.30    9.40
  18   1   4   11.40    4.70
   0 -18  -4   -6.50    7.50
  18   0  -4   -1.30    5.80
  18   0   4    2.70    3.70
  -1 -18  -4    0.20    8.90
  18  -1  -4    0.50    6.20
  18  -1   4    3.30    3.90
  18  -2  -4    5.60    6.30
  -2 -18  -4   -6.00    8.70
  18  -2   4    3.10    4.00
  18  -3  -4   10.60    7.50
  -3 -18  -4   14.60   10.30
  18  -3   4   19.40    4.90
  18  -4  -4   -4.70    7.10
  -4 -18  -4   -9.90    9.30
  18  -4   4   -2.50    3.70
  18  -5  -4   -4.40    6.30
  -5 -18  -4   21.60   10.80
  18  -5   4    6.30    4.10
  18  -6  -4   -0.20    6.40
  18  -6   4   -0.80    3.50
   6  18   4    0.80    5.20
  18  -7  -4    3.90    7.30
   7  18   4   39.50    7.50
  18  -7   4    5.90    3.80
  18  -8  -4   -0.20    6.90
  18  -8   4    2.10    3.80
   8  18   4   -0.10    5.20
  18  -9  -4    7.80    7.70
   9  18   4    4.50    5.90
  18 -10  -4    3.20    7.10
  10  18   4    1.90    5.40
   8 -19  -4   -0.40    8.20
  19   8   4    0.50    4.50
  19   7  -4   75.59   12.00
   7 -19  -4   67.29   13.90
  19   7   4   91.59   10.60
  19   6  -4    1.40    6.10
   6 -19  -4   -5.90    7.20
  19   6   4    4.20    4.70
   5 -19  -4   -2.10    7.60
  19   5  -4   -3.30    6.10
  19   5   4   16.90    5.50
  19   4  -4   11.70    7.80
   4 -19  -4   17.50    9.50
  19   4   4   19.60    5.80
  19   3  -4  173.98   18.20
   3 -19  -4  198.28   20.50
  19   3   4  211.38   14.30
   2 -19  -4   29.60   10.30
  19   2  -4   14.90    7.90
  19   2   4   16.00    5.30
  19   1  -4  117.09   15.10
   1 -19  -4  130.49   17.80
  19   1   4  119.79   10.90
   0 -19  -4    7.40    9.40
  19   0  -4    0.70    6.60
  19   0   4    5.90    4.40
  -1 -19  -4   45.80   12.40
  19  -1  -4   28.90    9.30
  19  -1   4   33.70    6.10
  19  -2  -4   32.10    9.20
  -2 -19  -4   30.00   11.40
  19  -2   4   21.10    5.50
  19  -3  -4  120.49   16.20
  -3 -19  -4  152.98   20.40
  19  -3   4  155.38   11.30
  19  -4  -4    3.20    6.50
  -4 -19  -4   -5.50    9.40
  19  -4   4    9.10    4.50
  -5 -19  -4   15.50   11.20
  19  -5  -4   27.40    9.20
  19  -5   4   29.90    5.70
  19  -6  -4    4.90    7.60
   6  19   4    2.70    5.40
  19  -6   4    2.30    3.80
  19  -7  -4   -1.60    6.40
  19  -7   4    1.50    3.80
   7  19   4   -1.20    5.10
  19  -8  -4   -1.60    7.20
   8  19   4    7.20    5.90
  19  -8   4   -0.50    4.00
   5 -20  -4    8.60   12.20
  20   5  -4    6.90    7.40
  20   5   4    6.20    5.10
   4 -20  -4    7.40   10.50
  20   4  -4    0.30    6.80
  20   4   4   -2.60    4.40
   3 -20  -4    5.30    9.90
  20   3  -4    1.40    6.90
  20   3   4    2.10    4.40
   2 -20  -4    0.60    9.20
  20   2  -4   -8.00    6.40
  20   2   4   -2.10    4.30
  20   1  -4    0.70    7.00
   1 -20  -4    0.60   10.20
  20   1   4    4.50    4.40
   0 -20  -4    4.50   10.40
  20   0  -4    5.60    7.10
  20   0   4    9.70    4.90
  -1 -20  -4    4.40   10.20
  20  -1  -4    2.30    6.90
  20  -1   4    1.00    4.10
  20  -2  -4    4.80    7.40
  -2 -20  -4    8.00   10.40
  20  -2   4    7.00    4.60
  -3 -20  -4    0.80   11.20
  20  -3  -4   -2.30    6.70
  20  -3   4    0.40    3.90
  -4 -20  -4   11.00   13.40
  20  -4  -4   -0.60    6.60
  20  -4   4   -5.80    3.60
  20  -5  -4   -3.20    6.60
  20  -5   4    1.20    4.20
   0   0  -5    3.60    5.60
   1   0  -5   65.49    9.80
  -1   0  -5   64.29   10.30
   0   1  -5   72.79   10.00
   0  -1  -5   94.09   11.90
  -1   1  -5  205.08   16.10
   1   1  -5  215.98   15.70
   1  -1  -5  243.68   16.80
  -1  -1  -5  245.58   17.10
   2   1  -5   58.89    8.50
  -1   2  -5   67.79   10.00
  -2   1  -5   28.70    8.30
  -1  -2  -5   33.20    8.30
   2  -1  -5   20.90    6.40
   2   2  -5  226.18   14.90
  -2  -2  -5  227.78   17.40
  -2   2  -5  204.68   16.30
   2  -2  -5  212.78   15.90
   3   2  -5  103.29   10.30
   2  -3  -5   92.59   11.50
  -3  -2  -5   94.49   12.50
  -2   3  -5  101.39   11.70
   1  -3  -5   76.49   10.70
   3   1  -5   61.89    8.50
  -3  -1  -5   67.79   11.00
   0   3  -5  210.98   14.90
   3   0  -5  174.98   14.00
   0  -3  -5  191.58   15.90
  -3   0  -5  209.98   17.10
   1   3  -5   -2.60    4.40
   3  -1  -5   -3.10    4.20
  -3   1  -5   -5.40    6.40
  -2  -3  -5   31.10    8.40
   2   3  -5   36.50    7.10
  -3   2  -5   30.90    8.40
   3  -2  -5   37.00    7.40
  -3   2   5   40.20    4.50
  -3   3  -5    4.30    5.60
   3  -3  -5    3.60    5.70
   3   3  -5    6.40    4.60
  -3  -3  -5   11.20    6.70
  -3   3   5    7.70    2.60
   4   3  -5   95.99   10.10
  -4  -3  -5  135.19   14.00
  -3   4  -5   83.19   11.10
   3  -4  -5  145.39   13.50
  -4  -3   5   98.19    7.60
   4   2  -5  136.99   12.00
  -4  -2  -5  160.38   15.20
  -2   4  -5  138.69   12.90
   2  -4  -5  136.79   13.90
  -2   4   5  149.49    8.70
  -4  -2   5  155.68    9.10
  -1   4  -5   19.60    6.70
   4   1  -5   21.00    5.80
  -4  -1  -5   23.60    8.30
  -4  -1   5   26.60    4.00
  -4   0  -5    3.70    6.30
   4   0  -5    2.00    4.40
   0   4  -5   -0.80    5.20
   0  -4  -5   -6.20    6.10
  -4   0   5   -1.20    2.00
   4  -1  -5   11.80    5.30
  -4   1  -5    2.30    6.20
  -1  -4  -5    0.20    6.30
  -4   1   5    6.60    2.40
   2   4  -5  222.68   14.60
   4  -2  -5  213.58   15.80
  -4   2  -5  215.98   16.60
  -2  -4  -5  208.08   17.50
  -4   2   5  219.98   11.40
  -3  -4  -5   38.70    8.90
   4  -3  -5   29.40    7.60
   3   4  -5   27.50    6.30
  -4   3  -5   34.50    7.90
  -4   3   5   34.40    4.90
   4   4  -5   35.50    6.50
  -4  -4  -5   59.19   10.50
   4  -4  -5   42.60    8.40
  -4  -4   5   49.40    6.60
  -4   4   5   37.00    5.20
  -5  -4  -5   66.09   11.10
   4  -5  -5   95.69   11.70
   4  -5   5   77.49    6.40
  -5  -4   5   85.19    8.20
  -4   5   5   73.39    6.80
   3  -5  -5  108.09   12.70
  -5  -3  -5  124.09   14.20
  -3   5  -5  140.09   12.00
   5   3  -5  148.09   11.70
  -5  -3   5  130.99    8.90
  -3   5   5  116.09    8.30
   2  -5  -5   34.00    8.20
  -5  -2  -5   37.30    9.20
   5   2  -5   39.80    7.00
  -2   5  -5   40.70    7.60
  -2   5   5   39.60    5.40
  -5  -2   5   44.00    5.40
  -1   5  -5  100.59   11.40
   1  -5  -5  102.89   13.40
  -5  -1  -5  126.99   14.10
   5   1  -5  112.69   10.80
  -1   5   5  122.59    8.20
  -5  -1   5  109.19    7.90
  -5   0  -5   91.49   12.40
   0  -5  -5   80.79   11.80
   0   5  -5   93.69   10.20
   5   0  -5   60.79    9.10
  -5   0   5   70.29    6.30
  -5   1  -5    4.10    6.30
  -2  -5  -5   44.20    9.50
   2   5  -5   50.49    7.50
  -5   2  -5   41.40    8.80
   5  -2  -5   46.10    8.30
  -5   2   5   45.30    5.40
   3   5  -5   20.80    5.30
   5  -3  -5   26.70    6.60
  -3  -5  -5   11.60    7.00
  -3  -5   5   22.10    3.90
   5  -3   5   18.60    4.30
  -5   3   5   21.40    3.90
   4   5  -5   85.19    8.70
  -4  -5  -5   61.59   11.00
   5  -4  -5  116.59   12.00
  -5   4   5   76.89    7.00
  -4  -5   5   93.39    7.60
   5  -4   5   68.19    6.50
   5   5  -5    6.00    4.40
  -5  -5  -5    0.80    6.60
   5  -5  -5   -4.00    5.00
  -5  -5   5    1.50    3.40
   5  -5   5   -1.80    2.50
  -5   5   5   -1.90    2.20
   5  -6  -5  200.18   16.30
  -6  -5  -5  189.68   17.80
   6   5  -5  209.98   13.70
  -5   6   5  208.08   12.00
   5  -6   5  203.48   10.80
  -6  -5   5  218.38   13.50
   6   4  -5  206.88   14.00
  -6  -4  -5  211.68   18.00
   4  -6   5  190.18   10.50
  -4   6   5  204.78   11.80
  -6  -4   5  207.68   12.50
  -6  -3  -5  164.68   16.00
   6   3  -5  155.18   12.60
   3  -6  -5  145.89   14.60
  -6  -3   5  166.88   10.50
   3  -6   5  155.88    9.00
  -3   6   5  165.78   10.30
  -6  -2  -5    0.50    7.10
  -2   6  -5    1.50    4.80
   2  -6  -5    5.60    6.00
   6   2  -5    4.70    4.70
  -2   6   5    5.50    3.30
  -6  -2   5    7.30    2.90
   6   1  -5    5.80    5.00
   1  -6  -5   -0.20    7.00
  -6  -1  -5   11.20    7.30
  -1   6  -5    7.60    5.10
  -6  -1   5    7.60    2.90
  -1   6   5   10.60    3.50
   6   0  -5   41.80    7.60
   0  -6  -5   39.20    9.90
  -6   0  -5   37.90    9.50
   0   6   5   51.79    6.60
  -6   0   5   45.90    5.60
   6  -1  -5  160.18   13.30
   1   6  -5  173.08   12.10
  -1  -6  -5  137.59   14.90
  -6   1   5  158.78    9.80
   6  -1   5  144.39   10.40
  -2  -6  -5    0.20    6.50
   2   6  -5    6.40    4.40
   6  -2  -5    4.60    5.00
   6  -2   5    3.30    3.30
  -6   2   5    0.90    2.40
   6  -3  -5   46.20    8.50
  -3  -6  -5   33.80    8.50
   3   6  -5   42.00    6.40
   6  -3   5   34.10    5.20
  -3  -6   5   41.00    5.80
  -6   3   5   38.30    5.30
   4   6  -5   -0.10    3.50
   6  -4  -5    2.20    4.90
  -4  -6  -5   -4.80    6.20
   6  -4   5    2.50    2.60
  -6   4   5   -2.80    2.20
  -4  -6   5   -4.10    2.50
   5   6  -5   10.00    4.40
  -5  -6  -5   17.90    7.90
   6  -5  -5   12.40    6.20
   6  -5   5   11.80    3.10
  -6   5   5   13.10    3.70
  -5  -6   5   18.30    4.10
   6   6  -5   98.59    9.30
   6  -6  -5   94.09   12.00
  -6  -6  -5   79.99   12.70
  -6  -6   5   97.79    8.90
   6  -6   5   88.79    6.70
  -6   6   5   87.29    8.00
   7   6  -5   36.90    6.60
  -7  -6  -5   26.30    9.10
   6  -7  -5   13.20    6.90
   6  -7   5   16.90    3.30
  -6   7   5   20.80    4.30
  -7  -6   5   29.50    5.90
  -7  -5  -5    9.80    7.60
   7   5  -5    7.40    4.20
   5  -7  -5    6.00    5.70
  -7  -5   5    1.90    3.60
  -5   7   5    1.50    2.80
   5  -7   5   -0.30    2.20
   4  -7  -5   85.79   11.60
  -7  -4  -5   81.19   12.80
   7   4  -5  120.09   10.70
   4  -7   5   82.09    6.00
  -4   7   5   77.89    7.70
  -7  -4   5  112.59    8.90
  -7  -3  -5   -9.60    6.70
   7   3  -5   -4.00    3.50
   3  -7  -5   -4.30    5.20
   3  -7   5   -3.20    2.10
  -3   7   5   -3.00    2.80
  -7  -3   5    1.70    2.80
   7   2  -5  218.08   15.00
   2  -7  -5  192.98   16.80
  -2   7   5  202.38   12.60
   2  -7   5  221.18   10.60
  -7  -2   5  230.48   12.80
  -1   7  -5   -4.40    4.80
   7   1  -5    6.70    4.70
   1  -7  -5   -2.20    6.50
   7   1   5   -1.90    3.60
  -1   7   5    4.90    3.30
  -7  -1   5    2.50    2.50
   7   0  -5   40.60    7.70
   0   7   5   64.39    7.30
   1   7  -5   29.70    7.20
  -1  -7  -5    7.20    6.50
   7  -1  -5   -2.80    4.70
  -7   1   5    1.40    2.30
   7  -1   5    1.40    3.40
  -2  -7  -5  117.99   14.40
   7  -2  -5  127.39   12.70
  -7   2   5  125.29    8.90
  -2  -7   5  126.19    9.20
   7  -2   5  122.39    9.40
   2   7   5  136.29   10.10
  -3  -7  -5   32.70    9.00
   7  -3  -5   37.50    7.70
  -7   3   5   36.40    5.10
   7  -3   5   36.70    5.20
   4   7  -5   10.50    4.40
   7  -4  -5    3.10    5.20
  -4  -7  -5    2.90    7.00
  -7   4   5   -1.00    2.30
   7  -4   5   -1.70    2.60
   5   7  -5   69.59    8.10
   7  -5  -5   61.59    9.90
  -5  -7  -5   77.39   12.40
  -7   5   5   67.19    7.20
  -5  -7   5   84.49    7.90
   7  -5   5   68.09    6.30
   7  -6  -5   68.09   10.50
   6   7  -5   64.19    8.20
  -6  -7  -5   74.29   12.60
  -7   6   5   72.99    7.20
   7  -6   5   65.19    5.90
  -6  -7   5   61.59    7.80
  -7  -7  -5    9.80    8.10
   7  -7  -5   34.70    8.30
   7   7  -5   19.10    5.30
  -7   7   5   17.30    4.30
  -7  -7   5   18.00    4.90
   7  -7   5   19.30    3.30
   7  -8  -5    2.80    6.10
   8   7  -5    7.00    4.20
  -8  -7   5    9.20    4.70
  -7   8   5    6.00    3.40
   6  -8  -5  165.48   15.70
   8   6  -5  193.28   13.30
  -6   8   5  177.68   12.00
  -8  -6   5  185.38   13.60
   8   5  -5   26.40    5.60
   5  -8  -5   20.10    7.40
  -8  -5   5   23.60    5.60
   8   5   5   42.00    6.60
  -5   8   5   23.50    4.80
   4  -8  -5  244.38   19.20
   8   4  -5  275.57   17.30
  -4   8   5  306.27   15.70
   8   4   5  260.57   16.10
  -8  -4   5  274.17   15.80
   8   3  -5   22.30    6.10
   3  -8  -5   19.80    7.30
  -8  -3   5   24.70    5.10
   8   3   5   44.50    6.90
  -3   8   5   24.10    4.80
   8   2  -5    4.10    4.60
   8   2   5   -0.60    4.00
  -8  -2   5    2.70    2.80
   1  -8  -5   64.59   11.30
   8   1  -5   66.39    9.10
  -1   8   5   57.49    7.90
  -8  -1   5   65.79    7.00
   8   1   5   65.39    8.00
   8   0  -5  204.88   15.10
   0  -8  -5  195.08   17.40
  -8   0   5  207.98   12.60
   8   0   5  206.58   12.90
   0   8   5  224.28   13.20
  -1  -8  -5    2.40    6.90
   8  -1  -5    0.40    5.10
   1   8   5    9.30    4.00
  -8   1   5    7.20    3.20
  -2  -8  -5   78.09   11.90
   8  -2  -5   66.79    9.80
  -2  -8   5   80.59    8.00
   8  -2   5   74.29    7.40
  -8   2   5   74.29    7.20
   2   8   5   90.09    8.80
  -3  -8  -5   36.70    9.40
   8  -3  -5   43.60    8.20
  -3  -8   5   59.59    7.30
   8  -3   5   58.79    6.70
  -8   3   5   43.50    6.30
  -4  -8  -5   64.79   11.20
   8  -4  -5   26.40    7.40
   8  -4   5   46.30    5.60
  -8   4   5   41.50    6.10
  -4  -8   5   45.20    6.40
  -5  -8  -5  101.09   14.00
   8  -5  -5  103.99   12.50
  -8   5   5   97.69    8.60
  -5  -8   5   98.39    9.20
   8  -5   5   84.69    7.20
  -6  -8  -5   44.40   11.30
   8  -6  -5   47.00    8.90
  -6  -8   5   61.99    7.70
   8  -6   5   46.20    5.40
  -8   6   5   45.40    6.60
   8  -7  -5  111.89   13.70
  -7  -8  -5  119.99   16.20
   8  -7   5  126.99    7.90
  -8   7   5  134.39   10.20
  -7  -8   5  137.09   10.90
  -8  -8  -5    6.20    8.10
   8  -8  -5   11.60    6.80
  -8   8   5    1.90    3.10
  -8  -8   5    5.10    3.80
   8  -9  -5   36.80    9.50
   9   8   5   34.80    7.40
  -8   9   5   35.30    6.20
   9   7  -5  115.59   11.10
   7  -9  -5  128.59   14.90
  -7   9   5  150.38   10.80
  -9  -7   5  125.89   12.30
   9   7   5   90.89   10.70
   9   6  -5    9.20    4.50
   6  -9  -5    1.70    6.00
  -9  -6   5    4.90    4.20
   9   6   5    1.40    4.40
  -6   9   5    8.50    3.70
   9   5  -5   34.50    6.60
   5  -9  -5   18.50    7.60
  -9  -5   5   22.00    5.30
  -5   9   5   27.30    5.40
   9   5   5   28.40    6.30
   4  -9  -5    5.50    6.70
   9   4  -5   19.10    5.70
  -4   9   5   14.90    4.30
   9   4   5   17.50    5.30
  -9  -4   5   15.00    4.50
   3  -9  -5  107.99   14.00
  -9  -3   5  126.49   10.20
   9   3   5  121.19   10.40
  -3   9   5  128.49   10.10
   2  -9  -5   51.99   10.70
   9   2  -5   51.59    9.00
  -9  -2   5   52.59    7.00
   9   2   5   57.19    7.40
  -2   9   5   62.89    8.10
   1  -9  -5   -3.30    6.50
   9   1  -5    3.10    4.60
   9   1   5    6.70    4.10
  -9  -1   5    4.40    3.20
  -1   9   5    2.20    3.80
   9   0  -5   52.29    8.80
   9   0   5   57.19    7.20
  -9   0   5   49.30    6.70
   0  -9   5   49.20    6.90
   9  -1  -5    0.00    4.80
  -1  -9  -5    1.50    6.50
   1   9   5    4.10    3.90
   9  -1   5    1.40    3.60
  -9   1   5   -0.50    2.60
  -1  -9   5    2.20    3.30
  -2  -9  -5   72.99   12.20
   9  -2  -5   71.99   10.20
   2   9   5  109.19    9.90
   9  -2   5   75.49    7.90
  -9   2   5   73.49    7.60
  -2  -9   5  103.19    8.90
   9  -3  -5   -4.70    4.90
  -3  -9  -5   12.10    7.60
  -9   3   5   -0.20    3.00
   9  -3   5    5.90    3.40
  -4  -9  -5   98.69   14.10
   9  -4  -5   90.79   12.20
  -4  -9   5  110.49    9.90
  -9   4   5   87.49    8.30
   9  -4   5  109.89    8.20
  -5  -9  -5   -0.70    7.10
   9  -5  -5   -2.00    5.10
   9  -5   5   10.00    3.30
  -9   5   5   -1.30    2.70
  -5  -9   5    5.50    3.40
   9  -6  -5   41.30    8.90
  -6  -9  -5   74.69   12.90
  -6  -9   5   39.90    6.40
   9  -6   5   41.00    5.20
  -9   6   5   40.80    6.20
   9  -7  -5    5.20    6.30
  -7  -9  -5    2.10    7.80
   9  -7   5    5.50    2.80
  -9   7   5    3.40    3.50
  -7  -9   5    5.00    4.00
  -8  -9  -5   92.39   14.60
   9  -8  -5  100.99   13.60
  -9   8   5  106.69    9.60
   9  -9  -5   25.10    8.10
   9   9   5   14.40    6.50
   9 -10  -5   -9.00    5.70
  10   9   5   -0.60    4.50
   8 -10  -5   -1.60    5.70
  10   8   5   -1.90    4.30
  10   7  -5   88.39   10.20
   7 -10  -5   69.19   11.90
  -7  10   5   77.09    9.50
  10   7   5   77.79    9.90
   6 -10  -5   -2.10    6.10
  10   6  -5    6.00    4.10
  -6  10   5    5.20    3.80
 -10  -6   5    0.80    4.20
  10   6   5    1.30    4.80
  10   5  -5  332.47   20.30
   5 -10  -5  328.47   23.10
  10   5   5  318.77   19.20
 -10  -5   5  345.67   19.30
  -5  10   5  360.86   18.80
  10   4  -5    9.60    5.40
   4 -10  -5    1.70    6.50
  10   4   5    2.90    4.40
  -4  10   5   10.60    4.20
 -10  -4   5   14.60    4.40
  10   3  -5   74.39    9.90
   3 -10  -5   66.69   11.00
 -10  -3   5   67.69    7.90
  10   3   5   60.09    8.50
  -3  10   5   77.99    9.00
   2 -10  -5   16.30    8.30
  10   2  -5    8.00    5.60
  10   2   5   15.70    5.10
  -2  10   5   13.50    5.30
 -10  -2   5   13.00    4.10
   2 -10   5   17.70    5.50
  10   1  -5   63.39    9.70
   1 -10  -5   65.19   11.90
 -10  -1   5   77.69    8.00
  10   1   5   69.99    8.50
   1 -10   5   51.79    7.50
  -1  10   5   59.99    8.90
  10   0  -5   23.50    7.20
   0 -10  -5   18.30    8.30
  10   0   5   23.90    5.40
 -10   0   5   28.40    5.40
   0  10   5   28.80    5.90
  -1 -10  -5   47.00   10.40
  10  -1  -5   53.99    9.50
 -10   1   5   61.09    7.40
   1  10   5   71.39    9.50
  -1 -10   5   65.39    8.20
  10  -1   5   67.29    7.70
  -2 -10  -5   11.40    7.40
  10  -2  -5    0.00    5.40
  10  -2   5    8.30    3.70
 -10   2   5    6.80    3.50
  -2 -10   5    7.50    3.90
  10  -3  -5   29.30    8.20
  -3 -10  -5   30.50    9.40
 -10   3   5   36.90    5.80
  10  -3   5   32.10    5.30
  -3 -10   5   34.50    6.20
  10  -4  -5   73.79   11.10
  -4 -10  -5   75.89   13.00
  -4 -10   5   97.99    9.50
  10  -4   5   89.19    7.80
 -10   4   5   86.29    8.30
  10  -5  -5   16.70    7.10
  -5 -10  -5   15.60    9.10
  -5 -10   5   11.60    4.90
  10  -5   5   11.10    3.50
 -10   5   5   12.00    4.20
  -6 -10  -5  212.28   20.00
  10  -6  -5  198.18   17.10
  10  -6   5  199.28   11.40
 -10   6   5  230.48   14.00
  -7 -10  -5    5.90    8.20
  10  -7  -5   -3.30    5.90
  10  -7   5   -3.50    2.30
 -10   7   5   -2.00    2.90
  10  -8  -5   11.20    7.20
 -10   8   5   15.60    6.10
  10  -9  -5    4.70    6.60
   9  10   5    1.40    5.30
  10 -10  -5   47.80   10.40
  10  10   5   51.09    8.70
  10 -11  -5   21.30    8.40
  11  10   5   22.90    7.20
   9 -11  -5   -1.20    6.40
  11   9   5    9.60    5.40
   8 -11  -5   12.40    7.50
  11   8   5   18.20    6.40
  11   7  -5   15.00    5.60
   7 -11  -5    3.40    6.70
  11   7   5    7.30    5.60
  11   6  -5   15.40    5.30
   6 -11  -5    7.90    6.70
  11   6   5    3.00    4.70
  11   5  -5   10.80    5.50
   5 -11  -5   -1.10    6.30
  -5  11   5    3.60    4.40
  11   5   5    0.70    4.70
 -11  -5   5    6.60    3.90
   4 -11  -5   -4.30    6.30
  11   4  -5    3.40    5.50
  11   4   5    5.30    4.60
 -11  -4   5    4.20    3.70
  -4  11   5    3.90    4.10
   3 -11  -5   85.39   13.60
  11   3  -5   77.59   10.90
 -11  -3   5   90.99    9.10
  -3  11   5   76.19    9.50
  11   3   5   81.09    9.10
  11   2  -5    1.70    5.10
   2 -11  -5   -5.40    6.20
  11   2   5    1.20    3.90
 -11  -2   5    0.10    2.90
  -2  11   5    0.20    3.60
  11   1  -5   21.00    6.80
   1 -11  -5   12.90    7.90
  -1  11   5    9.10    5.50
 -11  -1   5   19.00    4.80
  11   1   5   22.70    5.80
   1 -11   5   23.90    7.20
   0 -11  -5   18.50    7.60
  11   0  -5    5.80    5.70
   0 -11   5    9.50    4.80
 -11   0   5    8.10    3.70
  11   0   5    6.70    4.30
  -1 -11  -5   57.79   10.90
  11  -1  -5   42.50    8.90
 -11   1   5   52.09    7.20
   1  11   5   68.49    9.50
  11  -1   5   42.60    6.80
  -1 -11   5   39.80    7.90
  -2 -11  -5    9.20    7.70
  -3 -11  -5   54.09   11.70
  11  -3  -5   45.70    9.20
  11  -3   5   44.20    6.20
 -11   3   5   52.49    7.30
  11  -4  -5   76.79   11.50
  -4 -11  -5   53.49   12.40
 -11   4   5   70.19    8.10
  11  -4   5   73.49    7.10
  11  -5  -5    2.70    6.20
  11  -6  -5   -5.10    5.30
  -6 -11  -5   -3.10    7.70
 -11   6   5   -3.90    2.80
  11  -6   5   -1.40    2.70
  11  -7  -5   37.10    9.30
  -7 -11  -5   60.29   11.90
  11  -7   5   38.60    5.30
  11  -8  -5   57.39   10.80
  11  -9  -5   16.40    7.50
   9  11   5   15.10    6.70
  11 -10  -5    9.70    7.40
  10  11   5    5.00    5.60
  11 -11  -5   -3.30    6.20
  11  11   5    5.10    5.50
  11 -12  -5   11.90    7.90
  12  11   5   10.30    6.30
  10 -12  -5   21.90    9.20
  12  10   5   31.20    7.40
   9 -12  -5   10.60    8.10
  12   9   5   20.90    6.90
   8 -12  -5    6.70    7.40
  12   8   5   23.20    6.50
  12   7  -5   20.80    6.60
   7 -12  -5   18.00    8.60
  12   7   5   31.80    6.90
  12   6  -5  148.09   14.20
   6 -12  -5  188.38   18.20
  12   6   5  198.38   14.10
   5 -12  -5    6.20    7.10
  12   5  -5   12.10    6.20
  12   5   5   18.00    5.80
   4 -12  -5  110.49   14.80
  12   4  -5   85.29   11.70
  12   4   5  101.69   10.30
  12   3  -5    8.50    6.10
   3 -12  -5    0.00    6.50
  12   3   5    4.70    4.70
  12   2  -5    3.00    5.40
   2 -12  -5    1.80    7.10
  12   2   5    3.30    4.40
 -12  -2   5    4.10    3.40
  12   1  -5  118.59   13.50
   1 -12  -5  115.39   15.80
  12   1   5  113.89   10.50
 -12  -1   5  121.99   10.60
   0 -12  -5   72.99   12.70
  12   0  -5   60.19   10.10
 -12   0   5   79.69    8.70
  12   0   5   63.29    8.00
  -1 -12  -5   24.80    9.00
  12  -1  -5   25.90    8.00
 -12   1   5   36.50    6.30
  12  -1   5   31.70    5.80
  12  -2  -5   14.60    7.20
  -2 -12  -5   13.00    8.00
 -12   2   5    7.10    3.90
  12  -2   5    9.60    4.20
  12  -3  -5   25.10    7.70
  -3 -12  -5   21.60    9.50
 -12   3   5   24.40    5.30
  12  -3   5   32.70    5.50
  -4 -12  -5   -5.50    7.30
  12  -4  -5  -11.00    4.90
 -12   4   5   -0.90    3.10
  12  -4   5    0.20    3.00
  12  -5  -5  104.49   13.60
  -5 -12  -5  101.69   15.30
  12  -5   5  117.79    8.80
 -12   5   5  126.89   14.40
  -6 -12  -5   -2.20    8.90
  12  -6  -5   20.00    7.80
  12  -6   5    4.60    3.30
  -7 -12  -5  179.68   19.20
  12  -7  -5  120.79   15.20
  12  -7   5  123.39    8.50
  12  -8  -5    6.40    6.60
  12  -9  -5    1.00    6.50
   9  12   5   20.60    6.60
  12 -10  -5   32.80    9.80
  10  12   5   37.60    8.00
  12 -11  -5   26.80    9.30
  11  12   5   27.10    7.50
  12 -12  -5   12.30    8.20
  12  12   5   10.50    6.50
  12 -13  -5   -2.00    7.50
  13  12   5    0.90    5.60
  11 -13  -5    6.10    8.20
  13  11   5    5.00    6.00
  10 -13  -5    4.90    7.60
  13  10   5    8.40    5.50
   9 -13  -5   50.99   11.20
  13   9   5    9.40    5.70
   8 -13  -5   24.20    9.40
  13   8   5   32.80    7.40
  13   7  -5   -6.50    4.30
   7 -13  -5   -7.50    6.50
  13   7   5    4.00    5.10
  13   6  -5    0.90    4.70
   6 -13  -5   -5.20    6.40
  13   6   5   -2.80    4.60
   5 -13  -5    2.50    8.30
  13   5  -5   19.30    7.00
  13   5   5   16.60    6.00
   4 -13  -5   34.20   10.20
  13   4  -5   24.30    7.80
  13   4   5   39.20    7.40
   3 -13  -5    0.30    7.50
  13   3  -5    1.70    5.40
  13   3   5    1.20    4.00
  13   2  -5   70.69   11.10
   2 -13  -5   48.40   11.40
  13   2   5   83.29    9.60
  13   1  -5   13.00    6.60
   1 -13  -5   15.60    8.20
  13   1   5    7.50    4.70
  13   0  -5    0.90    5.80
   0 -13  -5   15.60    8.70
  13   0   5    1.20    4.10
  13  -1  -5   43.00    9.50
  -1 -13  -5   63.59   12.00
  13  -1   5   66.09    8.10
  13  -2  -5   40.10    9.20
  -2 -13  -5   41.00   10.70
  13  -2   5   50.19    6.70
  13  -3  -5   28.50    8.30
  -3 -13  -5   35.40   10.80
  13  -3   5   33.10    5.70
  13  -4  -5    3.50    6.30
  -4 -13  -5  -13.70    8.10
  13  -4   5   -2.20    3.00
  -5 -13  -5   -0.10   10.10
  13  -5  -5    9.80    7.20
  13  -5   5   16.40    4.10
  13  -6  -5   45.40    9.70
  -6 -13  -5   41.00   12.30
  13  -6   5   49.90    6.20
  -7 -13  -5   10.20    9.80
  13  -7  -5    9.50    7.00
  13  -7   5   20.20    4.00
  13  -8  -5    7.10    6.70
   8  13   5    6.30    5.70
  13  -9  -5   -2.30    6.30
   9  13   5    8.60    6.00
  13 -10  -5    9.70    7.80
  10  13   5   18.70    6.90
  13 -11  -5   -9.30    6.00
  11  13   5    3.70    5.70
  13 -12  -5    5.80    8.40
  12  13   5    3.70    5.80
  13 -13  -5   14.50    8.90
  13  13   5   13.00    6.80
  13 -14  -5   19.80    9.70
  14  13   5   22.10    7.40
  12 -14  -5   14.10    9.40
  14  12   5   19.90    7.40
  11 -14  -5   18.50    9.50
  14  11   5   12.60    6.20
  10 -14  -5   -3.90    7.50
  14  10   5    3.30    5.20
   9 -14  -5   16.30    8.70
  14   9   5    8.10    5.80
   8 -14  -5   -4.70    6.90
  14   8   5   -2.30    4.60
   7 -14  -5   68.79   12.90
  14   7   5   74.59    9.90
  14   6  -5    1.30    5.50
   6 -14  -5    1.90    7.20
  14   6   5   10.80    5.50
   5 -14  -5   32.80   10.20
  14   5  -5   24.10    7.60
  14   5   5   40.30    7.40
   4 -14  -5   10.70    8.30
  14   4  -5   14.70    7.00
  14   4   5    4.10    4.80
  14   3  -5    3.40    5.60
   3 -14  -5   -1.60    7.10
  14   3   5    8.10    4.60
  14   2  -5   26.30    8.20
   2 -14  -5   24.60    9.50
  14   2   5   26.40    6.10
   1 -14  -5   -5.10    6.30
  14   1  -5   -5.20    5.80
  14   1   5   -1.10    4.10
  14   0  -5   95.49   13.60
   0 -14  -5  104.09   15.30
  14   0   5  131.79   10.60
  -1 -14  -5   -1.50    7.10
  14  -1  -5   -7.10    5.40
  14  -1   5    1.60    3.90
  -2 -14  -5   19.40    9.70
  14  -2  -5    3.20    6.30
  14  -2   5    1.00    3.80
  -3 -14  -5   65.59   13.10
  14  -3  -5   63.19   11.10
  14  -3   5   65.69    7.80
  14  -4  -5  153.98   16.10
  -4 -14  -5  172.08   19.80
  14  -4   5  174.28   11.20
  14  -5  -5  126.19   15.00
  -5 -14  -5  105.99   16.60
  14  -5   5  131.69    9.40
  14  -6  -5  115.39   15.10
  -6 -14  -5  103.29   16.20
  14  -6   5  114.79    8.80
  -7 -14  -5    7.90   10.20
  14  -7  -5    1.30    6.70
  14  -7   5    1.90    3.10
  14  -8  -5   -2.60    5.90
   8  14   5    7.10    5.40
  14  -9  -5   33.70    9.80
   9  14   5   57.09    9.80
  14 -10  -5    9.70    8.20
  10  14   5   10.30    6.30
  14 -11  -5   35.80   10.90
  11  14   5   64.49   10.40
  14 -12  -5    0.40    7.50
  12  14   5    8.70    6.70
  14 -13  -5    0.50    7.80
  13  14   5    5.00    5.90
  12 -15  -5    3.40    7.60
  15  12   5    5.20    5.80
  11 -15  -5   10.30    8.60
  15  11   5   12.50    6.20
  10 -15  -5   25.20   10.20
  15  10   5   24.70    6.90
   9 -15  -5    7.60    8.80
  15   9   5   17.30    6.50
   8 -15  -5    3.90    7.80
  15   8   5    1.30    4.70
   7 -15  -5   -3.90    7.40
  15   7   5    0.00    4.70
   6 -15  -5   19.00    9.20
  15   6   5   19.10    6.10
  15   5  -5   -4.30    5.30
   5 -15  -5    6.30    7.90
  15   5   5    5.40    4.70
   4 -15  -5   19.10    9.20
  15   4  -5    4.20    6.50
  15   4   5    9.00    4.90
  15   3  -5   16.20    7.70
   3 -15  -5   12.40    8.80
  15   3   5   15.50    5.50
   2 -15  -5   36.60   10.90
  15   2  -5   40.20    9.50
  15   2   5   60.39    8.10
   1 -15  -5   -8.80    6.90
  15   1  -5   -4.10    5.80
  15   1   5    1.80    4.30
  15   0  -5   -1.50    5.90
   0 -15  -5   -5.10    7.20
  15   0   5   -2.60    3.70
  15  -1  -5   12.70    7.50
  -1 -15  -5   -5.70    7.20
  15  -1   5    6.40    4.30
  -2 -15  -5   54.89   12.70
  15  -2  -5   75.99   11.80
  15  -2   5   81.69    8.60
  -3 -15  -5   -0.30    8.20
  15  -3  -5   -4.10    6.00
  15  -3   5    0.70    3.70
  -4 -15  -5   34.30   10.90
  15  -4  -5   41.60   10.00
  15  -4   5   34.90    5.80
  15  -5  -5    7.90    7.10
  -5 -15  -5   -2.30    8.30
  15  -5   5    2.90    3.40
  -6 -15  -5   27.90   11.20
  15  -6  -5   20.70    8.90
  15  -6   5   28.10    4.90
  -7 -15  -5    9.00    9.70
  15  -7  -5   -4.40    6.70
  15  -7   5    0.90    3.20
  15  -8  -5   28.90    9.40
   8  15   5   32.10    8.00
  15  -9  -5    3.90    7.70
   9  15   5    3.20    5.90
  15 -10  -5    7.40    7.70
  10  15   5    1.10    5.70
  15 -11  -5   -1.80    7.30
  11  15   5    4.20    5.80
  15 -12  -5    6.90    8.40
  12  15   5    3.40    6.10
  10 -16  -5   -6.70    7.20
  16  10   5   -1.00    5.00
   9 -16  -5   28.70   10.20
  16   9   5   39.40    8.10
   8 -16  -5   73.29   14.30
  16   8   5   86.69   10.80
   7 -16  -5   55.49   12.60
  16   7   5   59.39    9.10
   6 -16  -5   61.09   12.90
  16   6  -5   36.60    9.90
  16   6   5   78.09   10.00
  16   5  -5   -9.40    5.10
   5 -16  -5   -0.50    7.60
  16   5   5   -3.80    4.20
  16   4  -5   -4.50    5.90
   4 -16  -5   -4.50    7.20
  16   4   5   -2.60    4.20
  16   3  -5   21.90    8.20
   3 -16  -5   15.40    8.90
  16   3   5   24.50    6.10
   2 -16  -5    1.30    7.70
  16   2  -5    1.70    6.40
  16   2   5   -1.10    4.10
  16   1  -5   11.60    8.10
   1 -16  -5   18.00    9.70
  16   1   5   22.80    5.70
  16   0  -5    9.80    7.10
   0 -16  -5    1.30    7.70
  16   0   5    4.00    4.30
  -1 -16  -5   18.20    9.20
  16  -1  -5    2.20    6.50
  16  -1   5    0.20    3.70
  16  -2  -5    0.90    6.30
  -2 -16  -5    5.00    9.10
  16  -2   5    0.30    3.70
  16  -3  -5    6.50    7.10
  -3 -16  -5   10.30    9.60
  16  -3   5    8.80    4.30
  16  -4  -5   62.39   11.60
  -4 -16  -5   63.99   14.40
  16  -4   5   66.79    7.70
  -5 -16  -5   14.10   10.30
  16  -5  -5    6.80    7.60
  16  -5   5   14.90    4.30
  -6 -16  -5   27.30   11.00
  16  -6  -5   15.90    8.90
  16  -6   5   30.00    5.30
  16  -7  -5    6.60    7.80
  16  -7   5   15.50    4.90
  16  -8  -5   17.80    9.20
   8  16   5   31.70    8.30
  16  -9  -5    8.10    8.10
   9  16   5   27.70    8.00
  16 -10  -5   59.89   12.50
  10  16   5   62.09   10.40
   8 -17  -5    8.50    8.50
  17   8   5    1.60    5.30
   7 -17  -5   -9.20    6.70
  17   7   5    0.70    4.90
   6 -17  -5   33.70   11.40
  17   6  -5   20.10    8.70
  17   6   5   32.00    7.20
   5 -17  -5   -9.80    7.90
  17   5  -5    4.10    7.20
  17   5   5   14.30    5.80
  17   4  -5   41.80   10.50
   4 -17  -5   46.00   12.30
  17   4   5   48.10    8.00
  17   3  -5    0.50    6.80
   3 -17  -5   -2.00    7.60
  17   3   5    3.70    4.60
  17   2  -5   -0.40    6.40
   2 -17  -5   -2.50    7.60
  17   2   5   -3.20    3.90
   1 -17  -5    2.00    8.00
  17   1  -5    0.10    6.70
  17   1   5    4.40    4.30
   0 -17  -5    0.80    8.20
  17   0  -5    7.10    7.60
  17   0   5    9.80    4.70
  -1 -17  -5   23.00   11.10
  17  -1  -5   25.40    9.50
  17  -1   5   22.80    5.50
  17  -2  -5   15.40    8.40
  -2 -17  -5   10.10   10.00
  17  -2   5   21.30    5.20
  -3 -17  -5   14.00    9.40
  17  -3  -5    8.60    7.20
  17  -3   5    0.90    3.90
  -4 -17  -5   25.40   11.50
  17  -4  -5   35.50   10.40
  17  -4   5   29.30    5.70
  -5 -17  -5   26.40   11.40
  17  -5  -5   -3.40    7.00
  17  -5   5    3.60    3.70
  -6 -17  -5   27.70   11.80
  17  -6  -5   -8.40    6.40
  17  -6   5    8.70    4.00
  17  -7  -5   -1.50    7.20
   7  17   5    5.00    5.90
  17  -8  -5   53.39   12.10
   8  17   5   63.69   10.50
   9  17   5    6.50    6.40
   6 -18  -5   28.20   10.90
  18   6  -5   24.00    9.10
  18   6   5   34.30    7.50
   5 -18  -5   -0.20    8.20
  18   5  -5    3.60    7.10
  18   5   5    6.00    5.20
  18   4  -5    6.20    7.50
   4 -18  -5   15.30    9.10
  18   4   5   12.60    5.80
  18   3  -5   25.00    9.40
   3 -18  -5   39.80   11.80
  18   3   5   34.90    6.90
   2 -18  -5   64.49   13.40
  18   2  -5   68.29   12.80
  18   2   5   83.99    9.90
   1 -18  -5    7.30    8.60
  18   1  -5    3.80    7.60
  18   1   5    8.20    4.70
  18   0  -5    0.40    7.20
   0 -18  -5   -1.80    8.80
  18   0   5    5.10    4.50
  18  -1  -5    8.90    8.30
  -1 -18  -5   54.19   13.10
  18  -1   5   12.20    5.30
  18  -2  -5   34.70   10.40
  -2 -18  -5   34.50   12.00
  18  -2   5   31.30    6.20
  -3 -18  -5   61.69   14.10
  18  -3  -5   78.09   13.30
  18  -3   5   71.29    8.60
  -4 -18  -5   11.90   10.90
  18  -4  -5   15.90    8.80
  18  -4   5   20.40    4.90
  18  -5  -5   22.70    9.80
  -5 -18  -5   28.00   12.20
  18  -5   5   19.30    4.90
  18  -6  -5    7.20    7.70
  -6 -18  -5   -1.60    9.90
  18  -6   5   -3.40    3.20
  19   2  -5    5.00    7.50
   2 -19  -5    7.20    9.00
  19   2   5    2.10    4.50
   1 -19  -5   -4.00    8.50
  19   1  -5    2.90    7.40
  19   1   5    3.80    4.70
   0 -19  -5   43.80   13.00
  19   0  -5   64.39   12.50
  19   0   5   49.70    7.60
  -1 -19  -5   -1.00    9.30
  19  -1  -5   -2.30    7.00
  19  -1   5   -0.40    4.10
  -2 -19  -5    4.20    9.70
  19  -2  -5   -0.20    7.40
  19  -2   5    1.40    4.20
   0   0  -6  700.83   35.50
   0   1  -6   15.00    7.00
  -1   0  -6   14.90    7.40
   0  -1  -6   24.20    7.50
   1  -1  -6    5.80    5.90
  -1  -1  -6    5.10    6.60
   1   1  -6    7.40    6.10
  -1   1  -6   15.40    7.00
   2   1  -6  136.69   12.90
  -2  -1  -6  109.99   14.10
   1  -2  -6   93.19   13.00
  -1   2  -6   98.29   13.50
   0  -2  -6  135.69   14.30
  -2   0  -6   82.49   12.80
   0   2  -6  115.49   13.60
   2   0  -6   87.79   12.00
   2  -1  -6   33.30    8.20
  -2   1  -6   17.80    8.40
  -1  -2  -6   38.20    9.30
  -2  -2  -6   24.40    8.50
   2   2  -6   37.00    8.20
  -2   2  -6   31.80    9.50
   2  -2  -6   35.50    8.20
  -2   3  -6   15.40    7.40
   2  -3  -6   12.30    7.50
  -3  -2  -6   12.10    8.00
   3   2  -6    5.60    5.30
  -1   3  -6   24.20    7.30
   1  -3  -6   -3.30    5.90
   3   1  -6    7.50    5.40
  -3  -1  -6   10.20    7.60
   3   0  -6    7.10    5.60
   0   3  -6    6.50    6.90
  -3   0  -6    7.60    8.50
   0  -3  -6    3.60    6.90
  -1  -3  -6    3.80    6.80
   1   3  -6   12.20    6.60
  -3   1  -6   25.50    8.60
   3  -1  -6    6.50    5.80
  -3   2  -6    1.80    6.80
  -2  -3  -6   27.10    8.50
   2   3  -6    2.20    5.40
   3  -2  -6   -7.60    4.80
   3  -3  -6   16.70    7.10
  -3  -3  -6   12.00    7.80
   3  -4  -6   31.70    8.80
  -3   4  -6   13.80    7.50
  -4  -3  -6   25.10    9.00
   4   3  -6   22.70    6.60
  -3   4   6   29.80    4.30
  -4  -2  -6   98.09   14.00
   4   2  -6   77.79   10.60
  -2   4  -6   82.69   11.60
   2  -4  -6  100.99   13.60
  -4  -1  -6   61.59   11.20
   4   1  -6   61.69    9.50
  -1   4  -6   60.99   10.60
   1  -4  -6   66.29   11.20
   0   4  -6  148.39   14.40
   4   0  -6  147.19   13.80
  -4   0  -6  126.59   16.00
   0  -4  -6  162.78   16.20
   4  -1  -6   70.99   10.70
  -4   1  -6   90.69   13.20
   1   4  -6   95.19   12.00
  -1  -4  -6   87.09   12.90
  -4   1   6   71.59    6.20
   2   4  -6    1.60    5.70
  -4   2  -6   -8.50    6.60
  -2  -4  -6   -8.00    6.20
   4  -2  -6   -2.00    5.40
  -4   2   6   -4.80    2.10
  -3  -4  -6    6.80    7.50
   4  -3  -6   18.00    6.80
   3   4  -6   17.90    6.00
  -4   3  -6   10.40    7.10
  -4   3   6   14.40    3.40
   4   4  -6   -1.00    4.80
   4  -4  -6   -2.40    5.90
  -4  -4  -6    7.30    7.40
  -4   4  -6   -8.10    6.00
  -4   4   6   -2.40    2.30
  -5  -4  -6  108.59   15.30
   5   4  -6  160.48   13.20
   4  -5  -6  153.58   15.20
  -4   5   6  123.19    9.30
   4  -5   6  144.29    9.60
  -5  -4   6  146.59    9.80
  -3   5  -6    4.70    6.10
   5   3  -6    9.40    5.50
  -5  -3  -6    2.20    7.40
   3  -5  -6    6.90    6.60
  -5  -3   6    8.70    3.00
  -3   5   6    2.40    3.10
  -5  -2  -6   18.10    8.50
   5   2  -6   26.70    7.10
  -2   5  -6   17.60    7.00
   2  -5  -6    8.30    7.50
  -5  -2   6   23.10    4.00
  -2   5   6   34.70    5.20
   1  -5  -6   -6.70    6.40
  -5  -1  -6    1.40    7.20
   5   1  -6   -1.60    4.60
  -1   5  -6   -4.90    5.40
  -5  -1   6   -0.60    2.10
   0  -5  -6   20.60    8.70
   0   5  -6   20.20    7.40
   5   0  -6   17.80    6.70
  -5   0  -6   13.80    8.50
  -5   0   6   22.50    3.90
   1   5  -6    0.50    5.90
   5  -1  -6   -3.60    4.60
  -1  -5  -6   -8.70    6.10
  -5   1  -6    3.30    7.10
  -5   1   6   -1.60    2.20
  -5   2  -6   58.49   11.30
   2   5  -6   83.59   10.60
   5  -2  -6   63.39   10.30
  -2  -5  -6   68.69   12.30
  -5   2   6   64.09    6.20
  -3  -5  -6    2.10    6.90
   5  -3  -6   13.90    6.50
   3   5  -6   10.70    5.50
  -5   3   6    3.80    3.00
   5  -4  -6   45.30    9.30
   4   5  -6   40.40    7.40
  -4  -5  -6   29.40    9.60
   5  -4   6   30.60    5.30
  -5   4   6   28.70    4.80
   5   5  -6    8.40    5.40
  -5  -5  -6    7.20    7.80
   5  -5  -6   17.50    7.30
  -5  -5   6   11.10    3.40
   5  -5   6    4.50    3.60
  -5   5   6    7.90    3.20
   6   5  -6   11.00    5.20
   5  -6  -6  -11.90    6.10
  -6  -5  -6    3.80    7.80
   5  -6   6    1.10    3.00
   4  -6  -6  110.19   14.20
  -6  -4  -6  111.99   15.70
   6   4  -6  110.89   11.80
   4  -6   6  109.59    8.80
  -4   6   6  107.19    9.60
  -6  -4   6  121.29   10.60
   6   3  -6   91.59   11.20
  -6  -3  -6   96.29   14.60
   3  -6  -6   80.89   12.50
  -6  -3   6   97.39    7.90
   3  -6   6   89.49    8.00
  -3   6   6   96.09    8.90
   2  -6  -6  135.09   15.10
  -6  -2  -6  122.79   16.00
   6   2  -6  127.79   12.70
  -2   6   6  127.79    9.60
  -6  -2   6  129.69    9.10
   6   1  -6    3.80    5.20
  -6  -1  -6   -4.30    7.40
   1  -6  -6    3.60    6.90
  -1   6   6    6.50    3.70
  -6  -1   6    7.00    2.90
   0  -6  -6   96.59   13.70
   6   0  -6  114.29   12.90
  -6   0  -6   94.69   14.40
  -6   0   6  108.79    8.10
   6  -1  -6   57.89    9.50
  -1  -6  -6   44.60   10.70
  -6   1   6   49.20    5.90
  -2  -6  -6   22.00    8.80
   6  -2  -6   16.80    7.10
  -6   2   6   21.10    4.20
   6  -2   6   24.50    5.30
   6  -3  -6   -2.50    5.20
  -3  -6  -6   13.60    7.90
   6  -3   6   -1.20    3.40
  -6   3   6   -1.10    2.50
   6  -4  -6  125.99   14.80
  -4  -6  -6  138.89   17.10
  -6   4   6  135.69   10.30
   6  -4   6  129.39    9.50
  -5  -6  -6   48.00   11.20
   6  -5  -6   61.09   10.70
   6  -5   6   50.69    6.40
  -6  -6  -6   29.90   10.70
   6  -6  -6   32.80    8.90
   6  -6   6   25.70    4.80
   6  -7  -6   19.70    8.00
  -7  -6  -6   16.00    9.80
  -7  -5  -6   56.19   11.80
   7   5  -6   30.10    7.60
   5  -7  -6   32.70    8.90
   4  -7  -6   22.60    7.50
   7   4  -6   13.10    6.10
  -7  -4  -6   -0.10    8.30
   3  -7  -6   11.40    7.70
  -7  -3  -6   -2.60    8.40
   7   3  -6    7.70    6.00
  -7  -2  -6    9.00    8.40
   7   2  -6    7.80    5.70
   2  -7  -6    8.50    7.70
  -2   7   6    0.70    5.20
  -7  -2   6   12.30    4.40
   7   1  -6    1.10    5.80
   1  -7  -6   -4.40    7.00
  -7  -1   6    3.10    2.70
   7   1   6   -0.20    4.20
  -1   7   6    6.90    4.00
   7   0  -6   56.09    9.70
   0  -7  -6   65.19   11.70
  -7   0   6   48.90    6.40
   7   0   6   45.30    7.20
  -1  -7  -6   -1.20    7.40
   7  -1  -6    9.10    6.30
   7  -1   6   11.50    4.60
  -7   1   6    8.50    3.40
  -2  -7  -6   -4.20    7.10
   7  -2  -6    8.40    6.40
   7  -2   6    5.80    3.90
  -7   2   6    4.80    3.30
   7  -3  -6    2.90    6.20
  -3  -7  -6    0.10    7.40
   7  -3   6   -0.30    3.30
  -7   3   6   -0.80    3.10
  -4  -7  -6   31.80   10.40
   7  -4  -6   23.90    8.20
   7  -4   6   21.70    4.60
  -5  -7  -6    4.20    7.60
   7  -5  -6   12.20    7.10
   7  -5   6   -1.30    2.80
  -6  -7  -6   56.29   12.20
   7  -6  -6   76.49   12.00
   7  -6   6   70.69    7.50
   7  -7  -6    1.00    6.30
  -7  -7  -6   22.30   10.00
   7  -8  -6   31.80    9.50
  -8  -7  -6   39.10   12.00
   6  -8  -6   80.89   13.10
   8   5  -6    4.90    4.90
   5  -8  -6   -6.30    5.90
   4  -8  -6   -3.70    6.50
   8   4  -6    1.10    5.60
   8   4   6    9.20    5.30
   3  -8  -6   83.09   13.50
   8   3  -6   73.39   10.60
   8   3   6   75.29    9.40
   8   2  -6   11.60    6.50
   2  -8  -6   18.00    8.70
   8   2   6    4.40    5.10
   8   1  -6   58.39   10.00
   1  -8  -6   50.09   10.80
   8   1   6   53.19    7.70
   8   0  -6    3.20    5.70
   0  -8  -6    6.10    7.50
   8   0   6    7.70    4.70
   8  -1  -6   29.30    8.00
  -1  -8  -6   17.60    8.50
   8  -1   6   20.80    5.60
   8  -2  -6    9.20    7.00
  -2  -8  -6    5.00    8.00
   8  -2   6   10.70    4.60
  -3  -8  -6   48.90   11.60
   8  -3  -6   51.19   10.10
   8  -3   6   58.89    7.40
   8  -4  -6  122.39   14.70
  -4  -8  -6  143.39   17.30
   8  -4   6  145.29   10.20
  -5  -8  -6    7.30    8.00
   8  -5  -6    1.00    6.20
   8  -5   6    3.00    3.20
  -6  -8  -6   54.49   12.80
   8  -6  -6   61.19   11.20
   8  -6   6   63.49    7.70
   8  -7  -6   30.30    9.30
  -7  -8  -6   20.80   10.60
   8  -8  -6  131.49   16.40
  -8  -8  -6  149.99   19.50
   8  -9  -6   -0.50    7.20
   9   8   6    2.30    5.60
   7  -9  -6    1.10    7.10
   9   7   6    0.20    4.90
   6  -9  -6   36.70    9.50
   9   6   6   39.60    8.00
   5  -9  -6   -6.00    6.30
   9   5  -6    7.50    5.50
   9   5   6   -4.40    4.60
   9   4  -6   77.09   10.80
   4  -9  -6   58.09   11.90
   9   4   6   72.39    9.60
   3  -9  -6    6.70    7.40
   9   3  -6   -0.50    5.30
   9   3   6   -1.00    4.70
   9   2  -6   25.10    7.80
   2  -9  -6   19.60    8.60
   9   1  -6    3.50    5.70
   1  -9  -6    8.70    8.00
   9   1   6    6.40    5.00
   0  -9  -6    4.10    7.60
   9   0  -6    3.20    5.80
   9  -1  -6    4.30    6.20
  -1  -9  -6    8.60    7.90
   9  -1   6    7.80    4.70
   9  -2  -6   16.10    7.30
  -2  -9  -6   30.90    9.90
   9  -2   6   27.90    5.70
   9  -3  -6    6.10    6.30
  -3  -9  -6   -1.50    7.40
   9  -3   6    3.70    4.00
  -4  -9  -6   46.90   11.80
   9  -4  -6   49.80   10.50
   9  -4   6   54.59    7.40
   9  -5  -6   19.20    8.30
  -5  -9  -6   18.50    9.70
   9  -5   6   15.30    4.40
  -6  -9  -6   30.40   10.90
   9  -6  -6   35.70    9.70
   9  -6   6   29.50    5.40
  -7  -9  -6   36.10   11.50
   9  -7  -6    9.10    7.70
   9  -8  -6    0.80    6.80
  -8  -9  -6  -10.20    8.90
   9  -9  -6    0.60    7.20
   9   9   6    0.30    5.20
   9 -10  -6   32.60   10.00
  10   9   6   19.90    7.00
   8 -10  -6  108.99   15.90
  10   8   6  150.08   13.90
   7 -10  -6   -2.60    7.00
  10   7   6   -0.20    5.20
   6 -10  -6   24.50    9.20
  10   6   6   25.80    7.10
   5 -10  -6    3.40    7.20
  10   5  -6   23.30    7.00
  10   5   6    2.00    5.00
   4 -10  -6  116.29   16.10
  10   4  -6  188.18   16.10
  10   4   6  152.88   12.90
  10   3  -6    4.40    5.70
   3 -10  -6    2.50    7.50
  10   3   6    1.90    4.80
   2 -10  -6  296.87   23.40
  10   2  -6  313.57   21.50
  10   2   6  313.77   18.60
   1 -10  -6   22.70    9.20
  10   1  -6    8.30    6.80
  10   1   6    6.90    5.10
   0 -10  -6   50.39   11.60
  10   0  -6   49.80   10.60
  10   0   6   52.89    7.80
  10  -1  -6   -7.70    5.20
  -1 -10  -6    8.10    8.60
  10  -1   6    2.60    4.30
  10  -2  -6    9.90    7.60
  -2 -10  -6   10.30    8.80
  10  -2   6   17.90    5.20
  10  -3  -6   33.00    9.30
  10  -3   6   65.79    8.00
  -4 -10  -6   41.00   11.50
  10  -4  -6   37.40    9.60
  10  -4   6   46.80    6.60
  10  -5  -6   -0.40    6.70
  -5 -10  -6   30.80   10.80
  10  -5   6    3.20    3.60
  -6 -10  -6  -10.10    8.20
  10  -6  -6    6.70    7.00
  10  -6   6    5.60    4.80
  -7 -10  -6   22.20   10.60
  10  -7  -6   20.40    8.70
  10  -8  -6    3.20    7.30
  -8 -10  -6    5.30    9.70
  10  -9  -6   11.10    8.00
   9  10   6   18.20    7.30
  10 -10  -6   34.20   10.60
  10  10   6   52.59    9.80
  10 -11  -6   -4.20    6.70
  11  10   6    1.00    5.80
   9 -11  -6    2.20    7.40
  11   9   6    1.60    5.80
   8 -11  -6   19.30    9.40
  11   8   6   28.60    7.80
   7 -11  -6   11.70    8.30
  11   7   6   15.50    6.60
   6 -11  -6   41.60   10.60
  11   6   6   50.09    8.80
   5 -11  -6   15.00    7.90
  11   5  -6   36.60    8.60
  11   5   6   15.60    6.30
   4 -11  -6    2.80    7.10
  11   4  -6    8.80    6.30
  11   4   6   13.70    6.10
   3 -11  -6   -6.30    6.70
  11   3  -6    0.30    5.80
  11   3   6    2.20    4.90
   2 -11  -6   15.40    8.60
  11   2  -6   11.10    7.00
  11   2   6    5.10    5.40
  11   1  -6    0.40    6.40
   1 -11  -6    2.90    7.60
  11   1   6   12.60    5.50
  11   0  -6   38.30    9.90
   0 -11  -6   36.20   11.00
  11   0   6   33.10    6.70
  11  -1  -6   -1.20    6.00
  11  -1   6    2.60    4.40
  -2 -11  -6   22.40    9.70
  11  -2  -6    0.80    6.90
  11  -2   6    9.80    4.70
  11  -3  -6   -0.50    6.40
  -3 -11  -6   22.10    9.80
  11  -3   6   -0.20    3.80
  -4 -11  -6   26.50   10.60
  11  -4  -6    3.90    6.60
  11  -4   6    7.50    4.00
  -5 -11  -6   -6.90    9.00
  11  -5  -6   -1.10    6.10
  11  -5   6   -1.30    3.40
  11  -6  -6   25.30    9.00
  -6 -11  -6   25.10   11.50
  -7 -11  -6   -4.00    8.90
  11  -7  -6   -3.30    6.40
  -8 -11  -6   34.20   12.00
  11  -8  -6   15.60    8.20
  11  -9  -6   12.70    8.00
   9  11   6    9.70    6.50
  11 -10  -6    0.00    7.70
  10  11   6    7.70    6.30
  11 -11  -6    0.70    7.50
  11  11   6   -4.70    5.40
  11 -12  -6   -0.90    7.60
  12  11   6    2.20    5.90
  10 -12  -6   33.80   10.20
  12  10   6   -1.90    5.60
   9 -12  -6    7.80    8.70
  12   9   6   16.20    6.60
   8 -12  -6    1.00    7.60
  12   8   6   -4.30    5.40
   7 -12  -6   -2.10    7.30
  12   7   6    7.40    5.90
   6 -12  -6    0.30    7.30
  12   6   6    6.30    5.40
  12   5  -6    9.00    6.10
   5 -12  -6    4.50    7.70
  12   5   6   11.90    5.90
   4 -12  -6    5.70    8.00
  12   4  -6    8.80    6.30
  12   4   6   14.30    6.00
   3 -12  -6   22.20    9.60
  12   3  -6   40.40    9.60
  12   3   6   28.90    7.10
   2 -12  -6  122.49   16.60
  12   2  -6  115.39   14.80
  12   2   6  122.69   11.50
  12   1  -6    2.50    6.50
   1 -12  -6    9.90    8.50
  12   1   6    1.80    4.70
   0 -12  -6   -3.50    6.90
  12   0  -6    2.50    6.30
  12   0   6    2.30    4.50
  -1 -12  -6    1.10    7.40
  12  -1  -6   14.70    8.00
  12  -1   6   16.40    5.30
  12  -2  -6  334.27   24.20
  -2 -12  -6  322.37   25.60
  12  -2   6  346.07   18.60
  12  -3  -6    2.00    6.50
  -3 -12  -6   42.10   11.40
  12  -4  -6   95.39   14.20
  -4 -12  -6  151.08   19.90
  12  -4   6  118.29    9.60
  -5 -12  -6   -6.70    8.60
  12  -5  -6    6.20    7.30
  12  -5   6    8.90    4.10
  -6 -12  -6   29.90   12.10
  12  -6  -6   47.40   10.90
  -7 -12  -6    4.60    9.80
  12  -7  -6    1.90    6.80
  12  -8  -6  102.89   14.90
  12  -9  -6    5.40    7.60
   9  12   6   14.10    6.90
  12 -10  -6    7.50    8.60
  10  12   6    2.00    5.90
  12 -11  -6    5.90    8.80
  11  12   6    1.00    5.90
  12 -12  -6   -8.40    7.30
  12  12   6    1.40    6.10
  11 -13  -6   -0.80    7.60
  13  11   6    3.80    5.90
  10 -13  -6    8.50    8.00
  13  10   6   13.90    6.90
   9 -13  -6   -4.30    7.40
  13   9   6    1.30    5.70
   8 -13  -6   -8.90    6.90
  13   8   6    2.40    5.50
   7 -13  -6   -8.90    7.50
  13   7   6   -1.90    5.10
   6 -13  -6   -7.70    6.40
  13   6   6   -2.90    5.70
  13   5  -6    3.20    5.60
   5 -13  -6   -3.70    7.00
  13   5   6    2.10    5.20
   4 -13  -6   13.80    8.60
  13   4  -6   12.00    7.10
  13   4   6   11.90    6.00
  13   3  -6    4.80    6.20
   3 -13  -6    0.50    7.20
  13   3   6   -1.90    4.70
   2 -13  -6    7.50    7.90
  13   2  -6   16.40    8.20
  13   2   6    5.30    5.30
  13   1  -6   16.70    8.00
   1 -13  -6    7.10    8.10
  13   1   6    5.20    5.20
   0 -13  -6    5.70    8.30
  13   0  -6    2.60    6.60
  13   0   6    5.10    4.80
  13  -1  -6   -5.40    6.30
  -1 -13  -6    8.10    8.80
  13  -1   6    3.40    4.30
  -2 -13  -6   15.80    9.70
  13  -2  -6    6.00    7.60
  13  -2   6    6.90    4.60
  -3 -13  -6   13.30    9.50
  13  -3  -6   14.80    8.10
  13  -3   6   19.20    5.20
  13  -4  -6   63.59   12.10
  -4 -13  -6   59.69   13.40
  13  -4   6   69.39    8.20
  13  -5  -6   29.10    9.40
  -5 -13  -6   23.20   11.20
  13  -5   6   22.80    5.00
  -6 -13  -6   36.40   12.60
  13  -6  -6   45.00   11.10
  13  -7  -6    7.30    8.40
  -7 -13  -6   22.70   11.50
  13  -8  -6   -6.50    6.80
  13  -9  -6    0.60    7.10
   9  13   6    8.30    6.40
  13 -10  -6   16.80    9.00
  10  13   6   18.20    7.60
  13 -11  -6   -6.70    6.70
  11  13   6    5.30    6.20
  10 -14  -6   91.29   15.70
  14  10   6  103.29   12.80
   9 -14  -6    7.50    7.90
  14   9   6    3.80    5.70
   8 -14  -6    8.10    8.70
  14   8   6    1.10    5.80
   7 -14  -6    8.90    8.80
  14   7   6   12.10    6.10
   6 -14  -6    6.30    8.10
  14   6   6    9.30    6.00
  14   5  -6    4.30    6.00
   5 -14  -6   -4.30    7.70
  14   5   6   -2.60    4.80
   4 -14  -6   33.40   11.30
  14   4  -6   35.50    9.60
  14   4   6   59.99    8.90
  14   3  -6    9.50    7.40
   3 -14  -6   19.00   10.20
  14   3   6   24.10    6.90
   2 -14  -6   18.30    9.30
  14   2  -6   12.80    8.00
  14   2   6   28.40    6.90
  14   1  -6    2.50    7.00
   1 -14  -6    4.00    8.60
  14   1   6    4.00    4.60
   0 -14  -6   -3.60    7.90
  14   0  -6   -2.20    6.50
  14   0   6    0.70    4.30
  -1 -14  -6    8.90    9.10
  14  -1  -6   15.70    8.20
  14  -1   6   23.80    5.80
  14  -2  -6   25.40    9.30
  -2 -14  -6   17.60   10.40
  14  -2   6   37.00    6.60
  14  -3  -6   28.00    9.50
  -3 -14  -6   47.20   12.90
  14  -3   6   21.20    5.40
  -4 -14  -6   11.00   10.00
  14  -4  -6   18.40    8.60
  14  -4   6    8.90    4.60
  14  -5  -6    1.60    7.60
  -5 -14  -6    3.10    9.80
  14  -5   6    0.00    3.70
  -6 -14  -6   21.90   11.40
  14  -6  -6   25.10    9.80
  -7 -14  -6   25.80   12.10
  14  -7  -6   24.90    9.80
  14  -8  -6   62.09   12.90
   8  14   6  110.29   12.80
  14  -9  -6    2.30    7.90
   9  14   6    7.30    6.60
  14 -10  -6    0.90    7.60
  10  14   6    8.70    6.70
   8 -15  -6   27.40   11.00
  15   8   6   27.50    7.70
   7 -15  -6   13.20    9.70
  15   7   6   16.20    6.40
   6 -15  -6   10.60    9.90
  15   6   6   22.00    6.80
   5 -15  -6   -3.20    8.20
  15   5  -6    0.00    8.10
  15   5   6    5.00    5.20
  15   4  -6   -2.10    6.60
   4 -15  -6    1.40    8.10
  15   4   6    3.90    5.00
  15   3  -6   -3.10    6.60
   3 -15  -6    4.60    8.50
  15   3   6    2.50    4.70
  15   2  -6    0.90    6.60
   2 -15  -6   -3.80    7.10
  15   2   6    3.80    4.70
  15   1  -6   -1.70    6.50
   1 -15  -6   -2.20    7.80
  15   1   6   -0.70    4.30
  15   0  -6    4.50    7.60
   0 -15  -6   10.80    9.80
  15   0   6    3.50    4.50
  -1 -15  -6    0.20    8.20
  15  -1  -6   -5.00    6.40
  15  -1   6   -5.30    3.90
  -2 -15  -6    8.30    9.40
  15  -2  -6    3.30    7.10
  15  -2   6    6.40    4.60
  -3 -15  -6   22.10   10.70
  15  -3  -6   30.40    9.70
  15  -3   6   13.10    4.80
  15  -4  -6    5.90    8.00
  -4 -15  -6   -6.00    8.90
  15  -4   6   -2.60    3.30
  15  -5  -6    8.00    8.30
  -5 -15  -6    3.30   10.50
  15  -5   6    7.00    4.10
  15  -6  -6    0.90    7.70
  -6 -15  -6   37.00   12.70
  15  -7  -6    1.90    7.90
  -7 -15  -6   -7.20    9.90
  15  -8  -6    8.70    8.60
   8  15   6   17.20    7.20
   6 -16  -6   18.60   10.10
  16   6   6   14.60    6.40
   5 -16  -6   25.10   11.00
  16   5   6   19.70    6.40
  16   4  -6   15.30    8.50
   4 -16  -6   40.50   11.80
  16   4   6   50.59    8.30
   3 -16  -6   -2.00    7.80
  16   3  -6   -2.90    6.90
  16   3   6   14.60    5.90
   2 -16  -6   13.30    9.80
  16   2  -6    9.60    8.00
  16   2   6   16.80    6.00
   1 -16  -6    6.50    9.10
  16   1  -6    3.30    7.80
  16   1   6   17.10    6.00
   0 -16  -6   45.40   12.80
  16   0  -6   36.80   11.00
  16   0   6   69.79    9.20
  16  -1  -6    0.00    7.40
  -1 -16  -6    5.40    9.60
  16  -1   6   -0.70    4.30
  16  -2  -6   57.49   12.90
  -2 -16  -6   54.79   14.10
  16  -2   6   65.69    8.90
  -3 -16  -6    6.60   10.30
  16  -3  -6   25.70   10.00
  16  -3   6   22.70    5.50
  -4 -16  -6    6.70    9.90
  16  -4  -6    5.50    7.90
  16  -4   6    6.40    4.40
  16  -5  -6   -1.50    7.10
  -5 -16  -6   -1.10   10.00
  16  -5   6   -2.20    3.60
  -6 -16  -6   -5.30    9.30
  16  -6  -6   -8.00    7.00
   3 -17  -6    9.90    9.30
  17   3  -6   -0.50    7.30
  17   3   6   -3.80    4.60
   2 -17  -6   21.40   10.10
  17   2  -6   19.90    9.30
  17   2   6   12.20    5.80
  17   1  -6   -3.90    7.00
   1 -17  -6   12.60    9.90
  17   1   6    1.90    4.70
   0 -17  -6    3.50    9.10
  17   0  -6    6.00    8.40
  17   0   6    0.20    4.30
  -1 -17  -6    4.50    9.90
  17  -1  -6    3.40    8.00
  17  -1   6    1.20    4.30
  17  -2  -6   22.50   10.30
  -2 -17  -6   18.60   11.20
  17  -2   6   14.20    5.10
  17  -3  -6   14.10    9.20
  -3 -17  -6   11.70   10.40
  17  -3   6    7.50    4.40
   0   0  -7    4.50    7.70
   0   1  -7   13.80    8.20
  -1   0  -7   32.20    9.80
   1   0  -7   12.20    8.40
  -1   1  -7  353.76   25.20
  -1  -1  -7  388.66   26.20
   1  -1  -7  379.16   25.10
   2   1  -7   53.79   10.60
  -1   2  -7   78.29   12.80
  -2  -1  -7   73.29   12.80
   0  -2  -7    9.30    7.70
   0   2  -7   36.00    9.20
  -2   0  -7    1.50    8.50
   2   0  -7   19.80    7.80
  -1  -2  -7   19.40    9.10
  -2   1  -7   -4.80    8.40
   1   2  -7   19.90    8.10
   2  -1  -7   11.90    7.20
  -2   2  -7   15.40    8.30
   2  -2  -7   13.50    7.20
   2   2  -7    1.50    6.70
  -2  -2  -7    1.80    7.60
   2  -3  -7   18.90    8.00
   3   2  -7   23.60    8.00
  -2   3  -7   36.30    9.60
  -3  -2  -7   30.70   10.50
   1  -3  -7   42.60   10.00
  -3  -1  -7   42.80   11.60
   3   1  -7   44.00    9.70
  -1   3  -7   39.30   10.40
  -3   0  -7    0.60    8.50
   3   0  -7   11.40    7.00
   0  -3  -7    5.60    7.50
   3  -1  -7    6.30    6.40
  -1  -3  -7    3.80    7.50
  -3   1  -7   -4.00    8.10
   1   3  -7   14.40    7.60
   2   3  -7   24.00    7.90
  -3   2  -7   -4.20    7.70
  -2  -3  -7    1.70    7.70
   3  -2  -7   -0.40    5.90
  -3  -3  -7   23.30   10.00
   3  -3  -7   16.20    7.70
  -3   3  -7   22.00    9.20
   3   3  -7   17.50    7.50
  -4  -3  -7   17.00    9.40
   3  -4  -7   21.00    8.50
   4   3  -7   17.00    7.00
  -3   4  -7    3.90    7.70
  -2   4  -7    3.30    7.40
   2  -4  -7    4.90    6.80
  -4  -2  -7    8.40    8.40
   4   2  -7    2.30    5.70
   1  -4  -7   15.90    7.70
   4   1  -7   -2.00    6.30
  -1   4  -7   12.20    7.60
  -4  -1  -7    3.10    8.40
   0   4  -7    7.00    7.60
   4   0  -7    4.80    6.80
   0  -4  -7    4.90    7.10
  -4   0  -7    3.10    8.60
   4  -1  -7   -0.50    6.20
  -4   1  -7   -5.70    7.70
  -1  -4  -7   -2.20    7.20
   1   4  -7    5.40    7.40
   2   4  -7    0.20    6.60
  -4   2  -7   -2.50    8.20
   4  -2  -7    5.60    7.30
  -2  -4  -7   -4.70    7.20
   3   4  -7   46.40    9.10
  -4   3  -7   31.30   10.60
   4  -3  -7   35.40    9.70
  -3  -4  -7   28.70   10.70
   4   4  -7   10.80    6.40
  -4  -4  -7   -4.60    8.40
   4  -4  -7   37.90   10.30
  -5  -4  -7   31.00   10.70
   4  -5  -7   25.80    8.90
   5   4  -7   31.60    7.90
   5   3  -7  191.08   17.00
  -5  -3  -7  203.58   21.00
   3  -5  -7  215.78   19.40
   2  -5  -7    5.30    7.20
  -5  -2  -7    7.40    8.80
   5   2  -7   13.80    7.20
   5   1  -7  280.07   21.10
   1  -5  -7  284.27   22.80
  -5  -1  -7  259.07   23.10
   0  -5  -7   39.10   10.90
   5   0  -7   35.70    9.00
  -5   0  -7   46.10   11.90
  -5   1  -7   26.50   10.40
   5  -1  -7   20.70    8.30
  -5   2  -7    3.60    9.30
   5  -2  -7    7.40    7.00
  -2  -5  -7    1.20    8.50
  -3  -5  -7   25.30   10.50
   5  -3  -7   38.00    9.60
   5  -3   7   35.00    6.60
   5  -4  -7    8.70    7.20
  -4  -5  -7   -7.70    7.90
   5  -4   7   -2.90    3.60
  -5  -5  -7    8.20    9.20
   5  -5  -7    4.90    6.70
  -6  -5  -7   -9.70    7.80
   5  -6  -7    3.40    7.20
   4  -6  -7   -4.10    6.60
  -6  -4  -7    0.60    8.80
   6   4  -7    2.20    5.90
   6   3  -7    1.90    6.00
  -6  -3  -7    3.90    9.10
   3  -6  -7   10.70    7.70
  -6  -2  -7   -2.30    8.20
   6   2  -7   11.20    7.10
   2  -6  -7   13.90    8.10
   6   1  -7    4.60    6.50
  -6  -1  -7   -3.30    8.20
   6   0  -7    2.00    6.00
  -6   0  -7   -8.10    9.20
   0  -6  -7   -1.30    7.40
   6  -1  -7    9.50    7.30
  -1  -6  -7   -1.90    7.70
   6  -1   7    2.50    4.70
  -2  -6  -7   -6.90    6.80
   6  -2  -7    8.20    6.50
   6  -2   7    1.20    4.20
  -3  -6  -7   -0.50    8.40
   6  -3  -7   -2.20    6.50
   6  -3   7   -0.30    4.20
  -4  -6  -7   -2.40    8.50
   6  -4  -7   -5.40    5.80
   6  -4   7   -0.20    3.60
  -5  -6  -7   10.40    9.20
   6  -5  -7   -2.10    6.50
   6  -6  -7    8.80    7.30
  -6  -6  -7    4.80    9.40
   6  -7  -7    6.00    7.60
  -7  -6  -7   12.00   10.40
  -7  -5  -7   -7.30    8.00
   5  -7  -7    4.20    6.90
  -7  -4  -7   -2.30    8.10
   7   4  -7   -7.20    5.60
   4  -7  -7   -3.00    7.40
   7   3  -7    8.60    6.60
  -7  -3  -7    2.80    9.40
   3  -7  -7    0.00    7.60
   7   2  -7    5.80    6.50
   2  -7  -7   -4.40    6.80
   7   1  -7   31.70    8.70
   1  -7  -7   14.60    9.00
   7   1   7   22.90    6.50
   0  -7  -7    4.10    8.10
   7   0  -7   17.20    8.10
   7   0   7   10.20    5.50
  -1  -7  -7    1.70    7.70
   7  -1  -7    1.50    6.00
   7  -1   7   -0.70    4.30
   7  -2  -7   21.60    8.80
  -2  -7  -7   17.20    9.80
   7  -2   7   20.30    5.80
  -3  -7  -7   95.29   15.80
   7  -3  -7   87.09   13.80
   7  -3   7  119.69   10.20
   7  -4  -7    1.10    7.20
  -4  -7  -7   -9.20    7.80
   7  -4   7   -0.60    3.60
  -5  -7  -7   92.59   15.70
   7  -5  -7  118.79   15.90
   7  -6  -7   25.90    9.40
  -6  -7  -7   12.10    9.80
  -7  -7  -7   32.00   11.90
   7  -7  -7   24.10    8.60
   7  -8  -7    9.30    8.10
   6  -8  -7    6.50    7.70
   5  -8  -7    1.00    7.20
   8   5   7    1.30    5.30
   8   4  -7   10.50    7.50
   4  -8  -7   -3.10    6.90
   8   4   7    0.40    5.30
   3  -8  -7   15.90    8.80
   8   3  -7   11.00    7.20
   8   3   7   16.60    6.60
   2  -8  -7   -1.10    7.80
   8   2  -7    6.80    6.60
   8   2   7    7.70    5.60
   1  -8  -7   -1.80    7.30
   8   1  -7    7.90    6.80
   8   1   7    1.00    4.70
   0  -8  -7    3.30    8.10
   8   0  -7    0.50    6.00
   8   0   7    5.60    5.10
   8  -1  -7    1.80    6.30
  -1  -8  -7    8.60    8.80
   8  -1   7   -1.80    4.50
   8  -2  -7    2.20    6.50
  -2  -8  -7   -9.50    7.50
   8  -2   7   -0.40    4.10
   8  -3  -7   14.50    8.00
  -3  -8  -7   10.30    9.60
   8  -3   7   15.60    5.20
  -4  -8  -7   -5.60    8.40
   8  -4  -7    1.20    7.10
   8  -4   7   -0.60    3.70
  -5  -8  -7   19.30   11.00
   8  -5  -7   17.40    9.10
  -6  -8  -7   -3.50    8.70
   8  -6  -7   -0.10    6.80
   8  -7  -7   -1.20    6.90
  -7  -8  -7    7.40    9.70
   8  -8  -7    5.90    8.00
   8  -9  -7    7.20    8.40
   9   8   7   22.30    7.70
   7  -9  -7  121.99   17.70
   9   7   7  174.08   14.90
   6  -9  -7    6.00    7.80
   9   6   7   13.90    6.40
   5  -9  -7   15.20    8.80
   9   5   7   16.90    6.70
   4  -9  -7    3.90    7.60
   9   4  -7   12.70   10.80
   9   4   7    9.60    5.80
   9   3  -7  230.58   19.20
   3  -9  -7  184.08   20.20
   9   3   7  215.08   16.10
   9   2  -7    9.80    7.60
   2  -9  -7    3.80    8.00
   9   2   7    2.10    5.00
   1  -9  -7   36.50   11.10
   9   1  -7   43.30   10.40
   9   1   7   51.09    8.30
   9   0  -7   -4.70    5.60
   0  -9  -7    1.20    7.70
   9   0   7    2.30    4.90
  -1  -9  -7    6.90    8.10
   9  -1  -7    4.70    6.90
   9  -1   7    3.50    4.80
  -2  -9  -7   25.70   10.40
   9  -2  -7    2.30    7.00
   9  -2   7   -3.50    4.20
  -3  -9  -7   10.90    9.60
   9  -3  -7   -7.90    6.70
   9  -3   7    0.30    4.00
   9  -4  -7   12.20    8.10
  -4  -9  -7   -6.90    8.60
   9  -4   7    1.00    3.90
  -5  -9  -7   11.20   10.50
   9  -5  -7    7.80    7.60
   9  -6  -7    0.60    7.10
  -6  -9  -7   17.30   11.00
  -7  -9  -7    4.50   10.40
   9  -7  -7    1.90    7.80
  -8  -9  -7    3.10   10.20
   9  -8  -7    1.80    7.70
   9  -9  -7   56.49   12.80
   9   9   7   65.69   10.80
   9 -10  -7   -4.90    7.20
  10   9   7   -3.10    6.00
   8 -10  -7    2.30    7.50
  10   8   7    2.40    6.00
   7 -10  -7    0.40    7.60
  10   7   7    1.10    6.00
   6 -10  -7  -10.70    6.50
  10   6   7   -3.20    5.00
   5 -10  -7    0.90    8.00
  10   5   7    6.80    6.20
   4 -10  -7    1.10    7.70
  10   4   7    7.40    6.10
   3 -10  -7   10.40    8.40
  10   3  -7   12.60    7.50
  10   3   7    4.40    5.80
   2 -10  -7    9.20    8.60
  10   2  -7    6.70    7.10
  10   2   7    1.60    5.40
   1 -10  -7   11.90    8.70
  10   1  -7   12.10    7.50
  10   1   7   18.90    6.30
   0 -10  -7    1.20    8.20
  10   0  -7    2.50    6.70
  10   0   7    4.20    4.90
  10  -1  -7    4.20    7.40
  -1 -10  -7   11.80    9.20
  10  -1   7    0.30    4.50
  -2 -10  -7   12.60    9.60
  10  -2  -7   -3.60    6.70
  10  -2   7   12.50    5.20
  -3 -10  -7   11.00    9.90
  10  -3  -7   -0.20    7.30
  10  -3   7    4.40    4.50
  -4 -10  -7   29.70   11.30
  10  -4  -7   -4.30    7.30
  10  -4   7    6.60    4.50
  10  -5  -7   -6.10    6.40
  -5 -10  -7   -4.20    9.80
  10  -6  -7    6.50    7.80
  -6 -10  -7   20.00   11.10
  -7 -10  -7   18.70   11.00
  10  -7  -7    3.60    7.50
  10  -8  -7   -4.20    7.00
  10  -9  -7   15.70    9.40
   9  10   7   19.20    7.90
  10 -10  -7   -4.20    7.60
  10  10   7   -0.60    5.80
   9 -11  -7    4.00    7.90
  11   9   7    7.40    6.70
   8 -11  -7    8.90    8.80
  11   8   7    1.90    6.20
   7 -11  -7   27.50   10.40
  11   7   7   39.10    8.80
   6 -11  -7    2.00    7.70
  11   6   7   -1.60    5.90
   5 -11  -7   -0.80    7.30
  11   5   7   -0.50    5.50
   4 -11  -7   19.40    9.60
  11   4   7   20.10    6.90
  11   3  -7  177.58   18.30
   3 -11  -7  191.58   20.30
  11   3   7  216.28   15.50
  11   2  -7    0.90    6.60
   2 -11  -7    1.70    7.60
  11   2   7    3.00    5.20
   1 -11  -7   51.69   12.70
  11   1  -7   54.79   11.70
  11   1   7   67.99    9.70
   0 -11  -7    8.60    8.60
  11   0  -7    7.60    8.10
  11   0   7   18.90    6.40
  11  -1  -7   72.59   13.50
  -1 -11  -7   88.49   15.20
  11  -1   7   95.89   10.30
  -2 -11  -7   59.69   12.60
  11  -2  -7    8.70    8.30
  11  -2   7   11.40    5.40
  11  -3  -7  154.68   18.70
  -3 -11  -7  138.49   19.30
  11  -3   7  151.88   12.00
  11  -4  -7   -3.70    7.70
  -4 -11  -7    5.60   10.20
  11  -4   7   -0.70    4.20
  -5 -11  -7   -1.80    9.80
  11  -5  -7    4.50    7.60
  -6 -11  -7   12.20   10.70
  11  -6  -7    1.90    8.00
  -7 -11  -7   60.99   13.90
  11  -7  -7   45.90   11.60
  11  -8  -7    7.90    8.50
  11  -9  -7   22.90   10.10
   9  11   7   24.20    8.40
   8 -12  -7   -2.00    7.20
  12   8   7    1.80    6.20
   7 -12  -7    1.60    7.70
  12   7   7    3.10    6.30
   6 -12  -7   -0.10    8.20
  12   6   7   -1.10    5.20
   5 -12  -7    6.70    8.20
  12   5   7    1.10    5.50
   4 -12  -7    7.60    8.20
  12   4   7    0.30    5.50
   3 -12  -7    2.30    8.00
  12   3  -7    8.50    7.30
  12   3   7    3.30    5.90
  12   2  -7   11.00    7.80
   2 -12  -7    9.30    8.40
  12   2   7    0.50    5.20
  12   1  -7   13.20    7.90
   1 -12  -7   -2.90    7.90
  12   1   7    1.80    5.40
   0 -12  -7   -4.00    7.40
  12   0  -7    4.80    7.70
  12   0   7    2.50    4.80
  12  -1  -7    5.90    7.30
  -1 -12  -7    3.30    8.80
  12  -1   7    2.70    4.70
  -2 -12  -7   -2.00    8.30
  12  -2  -7    9.30    8.00
  12  -2   7    4.50    4.60
  12  -3  -7    1.10    7.70
  -3 -12  -7   -2.90    8.70
  12  -3   7    5.30    4.50
  12  -4  -7   10.60    8.80
  -4 -12  -7    5.50    9.70
  12  -4   7    5.50    5.90
  -5 -12  -7    4.00    9.60
  12  -5  -7   14.60    8.80
  12  -6  -7   11.40    8.70
  -6 -12  -7   10.10   10.60
  12  -7  -7    8.80    8.80
  -7 -12  -7   -2.60    9.40
  12  -8  -7    0.50    7.60
   7 -13  -7    0.30    7.70
  13   7   7   -4.20    5.80
   6 -13  -7   -2.40    7.10
  13   6   7    0.60    5.70
   5 -13  -7   11.90    9.70
  13   5   7   24.10    7.60
   4 -13  -7   -0.90    7.70
  13   4   7    0.40    5.50
   3 -13  -7  -10.10    6.90
  13   3  -7    5.90    7.00
  13   3   7    0.40    5.40
   2 -13  -7  -12.30    7.30
  13   2  -7  -10.40    5.90
  13   2   7   -6.40    4.60
   1 -13  -7   -4.30    8.70
  13   1  -7   -0.10    6.90
  13   1   7    9.00    5.70
  13   0  -7    9.70    8.40
   0 -13  -7    4.30    9.40
  13   0   7   17.80    6.30
  13  -1  -7   75.99   14.60
  -1 -13  -7   61.99   14.60
  13  -1   7   92.19   10.40
  13  -2  -7   10.50    8.70
  -2 -13  -7   -3.80    9.60
  13  -2   7    2.80    4.50
  -3 -13  -7   88.09   16.60
  13  -3  -7   82.39   15.10
  13  -3   7   95.79    9.70
  -4 -13  -7   -2.20    9.50
  13  -4  -7   11.20    8.60
  -5 -13  -7    1.10   10.20
  13  -5  -7    2.90    8.20
  -6 -13  -7    9.30   10.60
  13  -6  -7    5.90    8.40
  13  -7  -7   85.79   15.40
  -7 -13  -7   80.99   17.00
   4 -14  -7  -10.70    7.20
  14   4   7    5.60    5.70
  14   3  -7   15.70    8.00
   3 -14  -7    8.50    9.00
  14   3   7   13.30    6.20
  14   2  -7    5.60    7.70
   2 -14  -7   -3.80    8.10
  14   2   7   -4.90    4.50
  14   1  -7    3.80    7.30
   1 -14  -7    6.60    9.50
  14   1   7   -2.70    4.80
   0 -14  -7   -9.60    7.50
  14   0  -7    2.60    8.00
  14   0   7    1.80    4.50
  -1 -14  -7    3.40    9.60
  14  -1  -7   10.50    8.80
  14  -1   7    0.80    4.60
  -2 -14  -7    0.40    9.40
  14  -2  -7    2.40    7.50
  14  -2   7   -0.80    4.30
  -3 -14  -7   -4.50    9.30
  14  -3  -7    5.80    8.10
  14  -3   7   -2.50    4.10
  14  -4  -7   15.20    9.00
  -4 -14  -7    4.80   10.70
   0   0  -8  227.68   21.40
  -1   0  -8   41.90   11.30
   0  -1  -8   21.70   10.10
   1   0  -8   30.40    9.80
   0   1  -8    7.80    9.20
   1   1  -8    7.00    8.40
  -1   1  -8    2.30    8.50
  -1  -1  -8   10.60    9.10
   1  -1  -8   12.00    8.20
   2   1  -8   74.89   13.20
  -1   2  -8   78.79   14.30
  -2  -1  -8   66.79   13.40
   1  -2  -8   70.69   13.30
   2   0  -8   39.20   10.70
   0  -2  -8   38.70   11.00
   0   2  -8   40.10   11.80
  -2   0  -8   29.80   11.20
   2  -1  -8   35.50   10.90
  -2   1  -8   35.40   11.50
   1   2  -8   49.20   12.00
  -1  -2  -8   34.40   11.30
  -2  -2  -8   -5.90    8.00
  -2   2  -8   16.70    9.80
   2   2  -8    1.20    8.00
   2  -2  -8    6.50    7.90
   2  -3  -8   15.10    9.10
  -3  -2  -8    7.80    9.50
   3   2  -8   15.80    8.40
   3   1  -8    5.30    7.50
  -3  -1  -8   12.60    9.40
   1  -3  -8   11.10    8.30
   3   0  -8   31.10    9.70
   0  -3  -8   20.30    9.90
  -3   0  -8   21.70   10.50
  -3   1  -8    9.50   10.00
  -1  -3  -8    6.60    9.00
   3  -1  -8   17.90    8.50
  -2  -3  -8   11.10    9.70
  -3   2  -8   -3.70    8.70
   3  -2  -8   22.30    9.30
   3  -3  -8   11.10    8.30
  -3  -3  -8    5.50    9.60
  -4  -3  -8   22.10   10.90
   3  -4  -8   25.80    9.80
  -4  -2  -8   68.09   14.60
   2  -4  -8   70.99   13.70
   4   2  -8   75.89   12.90
  -4  -1  -8   14.50   10.10
   4   1  -8   19.50    9.00
   1  -4  -8   10.00    8.40
   4   0  -8   42.80   10.30
  -4   0  -8   24.80   11.50
   0  -4  -8   31.50   11.10
  -1  -4  -8   11.60    9.50
   4  -1  -8    8.50    7.70
  -4   1  -8    1.70    9.50
  -4   2  -8  -10.80    8.40
  -2  -4  -8    8.60    9.20
   4  -2  -8    8.60    7.60
   4  -3  -8    7.90    8.00
  -3  -4  -8    5.20    8.90
  -4  -4  -8   -3.00    8.10
   4  -4  -8   10.10    8.20
  -5  -4  -8    8.70    9.70
   4  -5  -8    4.30    8.20
   3  -5  -8   -6.30    6.90
  -5  -3  -8   11.50    9.80
  -5  -2  -8    7.40   10.00
   5   2  -8   -2.30    7.00
   2  -5  -8   10.10    8.70
   1  -5  -8   15.40    9.20
  -5  -1  -8    7.60    9.70
   5   1  -8    6.10    7.50
   0  -5  -8    6.00    9.20
   5   0  -8   15.50    7.80
  -5   0  -8    3.60    9.70
  -5   1  -8    3.80    9.80
  -1  -5  -8   -7.00    8.00
   5  -1  -8    6.40    7.80
   5  -2  -8   12.50    7.80
  -2  -5  -8   10.70   10.00
   5  -2   8    6.90    5.50
  -3  -5  -8    3.80    9.70
   5  -3  -8    4.10    8.10
  -4  -5  -8    9.40    9.60
   5  -4  -8   10.10    8.50
  -5  -5  -8   17.00   11.00
   5  -5  -8   17.40    9.30
   5  -6  -8    7.00    7.60
  -6  -5  -8   12.90   11.30
  -6  -4  -8   -9.70    8.40
   4  -6  -8    6.30    8.00
  -6  -3  -8    4.90    9.70
   3  -6  -8    9.30    9.00
   6   2  -8   28.70    9.70
  -6  -2  -8   27.10   11.90
   2  -6  -8   33.90   11.60
   1  -6  -8    5.10    8.70
   6   1  -8   20.10    8.40
  -6  -1  -8   18.20   11.20
   6   0  -8   25.00    9.00
   0  -6  -8   15.20   10.30
   6   0   8   26.20    7.20
   6  -1  -8   15.80    8.70
  -1  -6  -8   22.30   11.10
   6  -1   8    8.80    5.80
  -2  -6  -8   14.50   10.50
   6  -2  -8   16.70    9.00
   6  -2   8   10.90    5.90
  -3  -6  -8   21.20   11.10
   6  -3  -8   17.60    9.10
  -4  -6  -8   33.30   11.80
   6  -4  -8   47.20   11.70
   6  -5  -8   -1.70    7.20
  -5  -6  -8    6.50    9.40
  -6  -6  -8   -4.60    8.70
   6  -6  -8    3.30    7.60
   6  -7  -8   18.00    8.90
  -7  -6  -8    7.20   10.40
  -7  -5  -8  -14.50    9.20
   5  -7  -8    3.10    8.10
   4  -7  -8   10.80    8.30
  -7  -4  -8   -2.60    9.00
   3  -7  -8    5.10    7.90
   2  -7  -8   18.80    9.30
   7   2  -8   12.70    7.90
   7   2   8    8.20    6.00
   1  -7  -8    4.10    8.50
   7   1  -8   11.30    7.60
   7   1   8   10.30    5.90
   7   0  -8    1.10    6.90
   0  -7  -8    4.60    8.60
   7   0   8   -0.70    5.00
   7  -1  -8    7.50    7.80
  -1  -7  -8   -3.90    8.20
   7  -1   8    0.50    5.10
   7  -2  -8   10.50    8.10
  -2  -7  -8    3.90    9.20
   7  -2   8    5.90    5.50
  -3  -7  -8   -0.80    8.70
   7  -3  -8   -4.00    6.60
   7  -4  -8   -1.50    7.30
  -4  -7  -8    4.10    9.30
   7  -5  -8    2.10    7.70
  -5  -7  -8   -2.20    9.90
   7  -6  -8    6.60    8.30
  -6  -7  -8   14.60   11.20
   7  -7  -8   -8.80    6.70
  -7  -7  -8   13.40   10.90
   7  -8  -8    6.40    8.20
   8   7   8    4.40    6.30
   6  -8  -8   20.40    9.90
   8   6   8   16.90    6.90
   5  -8  -8    6.20    8.40
   8   5   8    5.90    5.80
   4  -8  -8   -0.60    7.40
   8   4   8   10.80    6.50
   3  -8  -8   29.90   10.40
   8   3   8   25.90    7.30
   2  -8  -8    4.90    8.00
   8   2  -8   19.60    9.10
   8   2   8   16.30    6.50
   8   1  -8   25.00    9.20
   1  -8  -8   14.50    9.20
   8   1   8   24.00    6.90
   8   0  -8    5.50    7.40
   0  -8  -8    7.00    8.60
   8   0   8   -1.10    4.90
  -1  -8  -8    5.10    9.00
   8  -1  -8    3.70    7.20
   8  -1   8    3.30    5.00
   8  -2  -8    9.20    8.50
  -2  -8  -8    6.20    9.50
   8  -2   8    2.90    4.90
   8  -3  -8   -2.10    7.80
  -3  -8  -8    2.00    9.00
  -4  -8  -8   -2.10    9.60
   8  -4  -8   15.20    9.40
   8  -5  -8   -1.10    7.30
  -5  -8  -8   -1.80    9.60
  -6  -8  -8   -5.40    9.60
   8  -6  -8   -5.00    6.50
  -7  -8  -8   12.50   11.20
   8  -7  -8    3.90    8.10
   6  -9  -8   21.90   10.70
   9   6   8   12.70    6.90
   5  -9  -8  -12.60    6.80
   9   5   8   -2.20    5.40
   4  -9  -8    2.10    8.20
   9   4   8    3.60    5.90
   3  -9  -8    2.50    8.10
   9   3   8    0.50    5.30
   9   2  -8   25.60   10.70
   2  -9  -8   30.50   11.10
   9   2   8   33.20    8.20
   9   1  -8    6.70    7.80
   1  -9  -8   11.10    9.20
   9   1   8    3.40    5.70
   9   0  -8    3.70    7.60
   0  -9  -8   16.30    9.90
   9   0   8   14.30    6.30
   9  -1  -8   -2.40    7.00
  -1  -9  -8    8.80    9.50
   9  -1   8    1.70    5.10
  -2  -9  -8   18.40   10.50
   9  -2  -8   11.40    8.80
   9  -2   8    7.30    5.00
   9  -3  -8    3.20    7.90
  -3  -9  -8   -1.00    9.10
   9  -4  -8    3.50    8.40
  -4  -9  -8   10.40   10.30
   9  -5  -8    4.00    8.00
  -5  -9  -8    6.30   10.60
  -6  -9  -8    6.10   10.70
   9  -6  -8    0.30    7.80
   5 -10  -8   -1.00    8.10
  10   5   8   -1.10    5.90
   4 -10  -8   18.20   10.40
  10   4   8   29.50    8.10
   3 -10  -8   -3.70    7.50
  10   3   8    3.20    6.00
   2 -10  -8   64.69   14.60
  10   2   8   89.09   11.40
   1 -10  -8    1.40    8.30
  10   1  -8    1.50    7.20
  10   1   8    3.60    5.40
  10   0  -8    7.70    8.00
   0 -10  -8    4.10    8.90
  10   0   8    2.50    5.20
  10  -1  -8   14.80    9.00
  -1 -10  -8   18.50   10.90
  10  -1   8   20.60    6.40
  -2 -10  -8   26.40   11.80
  10  -2  -8   11.60    8.70
  10  -2   8   24.30    6.70
  10  -3  -8   27.70   10.60
  -3 -10  -8   28.00   12.20
  10  -4  -8    3.30    8.60
  -4 -10  -8    6.70   10.30
  10  -5  -8    6.90    8.40
  -5 -10  -8   24.60   12.00
   2 -11  -8    3.40    8.80
  11   2   8    3.40    5.90
   1 -11  -8   -2.10    8.20
  11   1  -8    2.20    7.30
  11   1   8   -1.90    5.20
   0 -11  -8   17.20   10.60
  11   0  -8   26.90   10.10
  11   0   8   21.90    7.00
  11  -1  -8   -2.30    7.10
  -1 -11  -8    8.30    9.80
  11  -1   8   -2.30    5.00
  11  -2  -8    2.50    8.20
  -2 -11  -8   -1.90    9.20
  11  -2   8   -0.70    5.30
   0   0  -9   -1.90    8.80
   1   0  -9   10.10   10.20
  -1   0  -9   -0.60    8.60
   0  -1  -9    3.20    9.30
  -1  -1  -9    7.10    9.60
   1  -1  -9   20.00   11.40
   1  -2  -9    4.40    9.00
  -2  -1  -9    5.30    9.40
  -2   0  -9    4.50    9.70
   0  -2  -9   -6.10    8.30
   2   0  -9   -4.40    8.30
   2  -1  -9   11.20    9.70
  -1  -2  -9   11.50    9.80
   2  -2  -9    6.60    8.70
  -2  -2  -9    7.30    9.50
   2  -3  -9   19.90   10.10
  -3  -2  -9    9.10   10.50
   1  -3  -9   -1.80    8.80
  -3  -1  -9   -2.00    9.50
  -3   0  -9   16.80   10.80
   3   0  -9   30.70   11.20
   0  -3  -9   21.10   11.20
  -1  -3  -9    0.50    9.50
   3  -1  -9    4.00    8.90
  -2  -3  -9    7.90   10.10
   3  -2  -9   -2.50    7.90
  -3  -3  -9   -6.80    8.90
   3  -3  -9    4.60    8.60
   2  -4  -9   28.60   10.90
   1  -4  -9    7.70    9.70
  -4  -1  -9    5.90   10.50
   0  -4  -9    4.20    9.30
   4   0  -9    8.00    9.00
  -4   0  -9    2.40    9.80
  -1  -4  -9   12.30   10.30
   4  -1  -9   11.50    9.00
  -2  -4  -9   20.30   11.50
   4  -2  -9   28.50   10.70

_computing_structure_solution     'SHELXT 2014/4 (Sheldrick, 2014)'
;
_shelx_hkl_checksum                94523
_olex2_submission_special_instructions  'No special instructions were received'
