# Supplementary material for: Various Approaches to Studying the Phase Transition in an Octamethylcyclotetrasiloxane Crystal: From X-ray Structural Analysis to Metadynamics
Source: Int J Mol Sci. 2022 Aug 13;23(16):9073. doi: 10.3390/ijms23169073 (PMC9408834; doi:10.3390/ijms23169073)
Supplement: Supplementary file 1 [file ijms-23-09073-s001.zip › 1-11_200.cif]

data_200
_audit_creation_date               2021-12-01
_audit_creation_method
;
Olex2 1.5
(compiled 2021.11.18 svn.ra9532c28 for OlexSys, GUI svn.r6429)
;
_shelxl_version_number             2014/6
_audit_contact_author_address      ?
_audit_contact_author_email        ?
_audit_contact_author_name         ''
_audit_contact_author_phone        ?
_publ_contact_author_id_orcid      ?
_publ_section_references
;
Dolomanov, O.V., Bourhis, L.J., Gildea, R.J, Howard, J.A.K. & Puschmann, H.
 (2009), J. Appl. Cryst. 42, 339-341.

Sheldrick, G.M. (2015). Acta Cryst. A71, 3-8.

Sheldrick, G.M. (2015). Acta Cryst. C71, 3-8.
;
_chemical_name_common              ?
_chemical_name_systematic          ?
_chemical_formula_moiety           'C8 H24 O4 Si4'
_chemical_formula_sum              'C8 H24 O4 Si4'
_chemical_formula_weight           296.63
_chemical_melting_point            ?
loop_
  _atom_type_symbol
  _atom_type_description
  _atom_type_scat_dispersion_real
  _atom_type_scat_dispersion_imag
  _atom_type_scat_source
 'C' 'C' 0.0033 0.0016 'International Tables Vol C Tables 4.2.6.8 and 6.1.1.4'
 'H' 'H' 0.0000 0.0000 'International Tables Vol C Tables 4.2.6.8 and 6.1.1.4'
 'O' 'O' 0.0106 0.0060 'International Tables Vol C Tables 4.2.6.8 and 6.1.1.4'
 'Si' 'Si' 0.0817 0.0704 'International Tables Vol C Tables 4.2.6.8 and 6.1.1.4'

_shelx_space_group_comment
;
The symmetry employed for this shelxl refinement is uniquely defined
by the following loop, which should always be used as a source of
symmetry information in preference to the above space-group names.
They are only intended as comments.
;
_space_group_crystal_system        'tetragonal'
_space_group_IT_number             86
_space_group_name_H-M_alt          'P 42/n'
_space_group_name_Hall             '-P 4bc'
loop_
  _space_group_symop_operation_xyz
 'x, y, z'
 '-x+1/2, -y+1/2, z'
 '-y, x+1/2, z+1/2'
 'y+1/2, -x, z+1/2'
 '-x, -y, -z'
 'x-1/2, y-1/2, -z'
 'y, -x-1/2, -z-1/2'
 '-y-1/2, x, -z-1/2'

_cell_length_a                     16.0373(19)
_cell_length_b                     16.0373(19)
_cell_length_c                     6.4481(17)
_cell_angle_alpha                  90
_cell_angle_beta                   90
_cell_angle_gamma                  90
_cell_volume                       1658.4(6)
_cell_formula_units_Z              4
_cell_measurement_reflns_used      3052
_cell_measurement_temperature      200
_cell_measurement_theta_max        30.351
_cell_measurement_theta_min        2.540
_shelx_estimated_absorpt_T_max     0.901
_shelx_estimated_absorpt_T_min     0.842
_exptl_absorpt_coefficient_mu      0.356
_exptl_absorpt_correction_T_max    0.7461
_exptl_absorpt_correction_T_min    0.5623
_exptl_absorpt_correction_type     multi-scan
_exptl_absorpt_process_details
;
SADABS-2014/5 (Bruker,2014/5) was used for absorption correction.
wR2(int) was 0.1587 before and 0.0656 after correction.
The Ratio of minimum to maximum transmission is 0.7537.
The \l/2 correction factor is 0.00150.
;
_exptl_absorpt_special_details     ?
_exptl_crystal_colour              colourless
_exptl_crystal_colour_primary      colourless
_exptl_crystal_density_diffrn      1.188
_exptl_crystal_density_meas        .
_exptl_crystal_density_method      ?
_exptl_crystal_description         irregular
_exptl_crystal_F_000               640
_exptl_crystal_preparation         ?
_exptl_crystal_recrystallization_method  'in situ, 0.3 mm capillary'
_exptl_crystal_size_max            0.5
_exptl_crystal_size_mid            0.3
_exptl_crystal_size_min            0.3
_exptl_transmission_factor_max     ?
_exptl_transmission_factor_min     ?
_diffrn_reflns_av_R_equivalents    0.0522
_diffrn_reflns_av_unetI/netI       0.0722
_diffrn_reflns_Laue_measured_fraction_full  0.985
_diffrn_reflns_Laue_measured_fraction_max  0.988
_diffrn_reflns_limit_h_max         22
_diffrn_reflns_limit_h_min         -16
_diffrn_reflns_limit_k_max         19
_diffrn_reflns_limit_k_min         -20
_diffrn_reflns_limit_l_max         8
_diffrn_reflns_limit_l_min         -9
_diffrn_reflns_number              10231
_diffrn_reflns_point_group_measured_fraction_full  0.985
_diffrn_reflns_point_group_measured_fraction_max  0.988
_diffrn_reflns_theta_full          25.242
_diffrn_reflns_theta_max           30.598
_diffrn_reflns_theta_min           1.796
_diffrn_ambient_temperature        200
_diffrn_detector                   'CCD area detector'
_diffrn_detector_area_resol_mean   8
_diffrn_detector_type              'Bruker SMART CCD 1K area detector'
_diffrn_measured_fraction_theta_full  0.985
_diffrn_measured_fraction_theta_max  0.988
_diffrn_measurement_device         'three-circle diffractometer'
_diffrn_measurement_device_type    'Bruker APEX-II CCD'
_diffrn_measurement_method         '\w and \f scans'
_diffrn_radiation_monochromator    graphite
_diffrn_radiation_probe            x-ray
_diffrn_radiation_type             MoK\a
_diffrn_radiation_wavelength       0.71073
_diffrn_source                     'sealed tube'
_diffrn_source_current             30.0
_diffrn_source_power               1.5
_diffrn_source_target              Mo
_diffrn_source_voltage             50.0
_reflns_Friedel_coverage           0.000
_reflns_Friedel_fraction_full      .
_reflns_Friedel_fraction_max       .
_reflns_number_gt                  1381
_reflns_number_total               2530
_reflns_special_details
;
 Reflections were merged by SHELXL according to the crystal
 class for the calculation of statistics and refinement.
 
 _reflns_Friedel_fraction is defined as the number of unique
 Friedel pairs measured divided by the number that would be
 possible theoretically, ignoring centric projections and
 systematic absences.
;
_reflns_threshold_expression       'I > 2\s(I)'
_computing_cell_refinement         'SAINT v8.34A (Bruker, 2013)'
_computing_data_collection         ?
_computing_data_reduction          'SAINT v8.34A (Bruker, 2013)'
_computing_molecular_graphics      'Olex2 1.5 (Dolomanov et al., 2009)'
_computing_publication_material    'Olex2 1.5 (Dolomanov et al., 2009)'
_computing_structure_refinement    'SHELXL 2014/6 (Sheldrick, 2015)'
_computing_structure_solution      'SHELXT 2014/4 (Sheldrick, 2014)'
_refine_diff_density_max           0.439
_refine_diff_density_min           -0.221
_refine_diff_density_rms           0.070
_refine_ls_extinction_coef         .
_refine_ls_extinction_method       none
_refine_ls_goodness_of_fit_ref     1.032
_refine_ls_hydrogen_treatment      constr
_refine_ls_matrix_type             full
_refine_ls_number_parameters       77
_refine_ls_number_reflns           2530
_refine_ls_number_restraints       0
_refine_ls_R_factor_all            0.1177
_refine_ls_R_factor_gt             0.0572
_refine_ls_restrained_S_all        1.032
_refine_ls_shift/su_max            0.001
_refine_ls_shift/su_mean           0.000
_refine_ls_structure_factor_coef   Fsqd
_refine_ls_weighting_details      
 'w=1/[\s^2^(Fo^2^)+(0.0622P)^2^+0.4935P] where P=(Fo^2^+2Fc^2^)/3'
_refine_ls_weighting_scheme        calc
_refine_ls_wR_factor_gt            0.1334
_refine_ls_wR_factor_ref           0.1553
_refine_special_details            ?
_olex2_refinement_description
;
1.a Idealised Me refined as rotating group:
 C1(H1A,H1B,H1C), C2(H2A,H2B,H2C), C3(H3A,H3B,H3C), C4(H4A,H4B,H4C)
;
_atom_sites_solution_hydrogens     geom
_atom_sites_solution_primary       dual
_atom_sites_solution_secondary     ?
loop_
  _atom_site_label
  _atom_site_type_symbol
  _atom_site_fract_x
  _atom_site_fract_y
  _atom_site_fract_z
  _atom_site_U_iso_or_equiv
  _atom_site_adp_type
  _atom_site_occupancy
  _atom_site_site_symmetry_order
  _atom_site_calc_flag
  _atom_site_refinement_flags_posn
  _atom_site_refinement_flags_adp
  _atom_site_refinement_flags_occupancy
  _atom_site_disorder_assembly
  _atom_site_disorder_group
 Si1 Si 0.43209(4) 0.88523(4) 0.48904(12) 0.0291(2) Uani 1 1 d . . . . .
 Si2 Si 0.61177(4) 0.93556(4) 0.35915(13) 0.0311(2) Uani 1 1 d . . . . .
 O1 O 0.38847(11) 0.97607(10) 0.5160(3) 0.0378(5) Uani 1 1 d . . . . .
 O2 O 0.51868(10) 0.89611(11) 0.3596(3) 0.0407(5) Uani 1 1 d . . . . .
 C1 C 0.36169(16) 0.81902(16) 0.3326(5) 0.0402(7) Uani 1 1 d . . . . .
 H1A H 0.3113 0.8065 0.4128 0.060 Uiso 1 1 calc R U . . .
 H1B H 0.3902 0.7669 0.2969 0.060 Uiso 1 1 calc R U . . .
 H1C H 0.3463 0.8486 0.2053 0.060 Uiso 1 1 calc R U . . .
 C2 C 0.45386(19) 0.84003(18) 0.7474(5) 0.0480(8) Uani 1 1 d . . . . .
 H2A H 0.4920 0.8767 0.8235 0.072 Uiso 1 1 calc R U . . .
 H2B H 0.4796 0.7850 0.7307 0.072 Uiso 1 1 calc R U . . .
 H2C H 0.4016 0.8344 0.8248 0.072 Uiso 1 1 calc R U . . .
 C3 C 0.68515(19) 0.86524(18) 0.4907(6) 0.0567(10) Uani 1 1 d . . . . .
 H3A H 0.7403 0.8915 0.4969 0.085 Uiso 1 1 calc R U . . .
 H3B H 0.6889 0.8127 0.4137 0.085 Uiso 1 1 calc R U . . .
 H3C H 0.6653 0.8541 0.6318 0.085 Uiso 1 1 calc R U . . .
 C4 C 0.6425(2) 0.9519(2) 0.0858(5) 0.0540(9) Uani 1 1 d . . . . .
 H4A H 0.6023 0.9891 0.0184 0.081 Uiso 1 1 calc R U . . .
 H4B H 0.6433 0.8982 0.0133 0.081 Uiso 1 1 calc R U . . .
 H4C H 0.6982 0.9770 0.0806 0.081 Uiso 1 1 calc R U . . .

loop_
  _atom_site_aniso_label
  _atom_site_aniso_U_11
  _atom_site_aniso_U_22
  _atom_site_aniso_U_33
  _atom_site_aniso_U_23
  _atom_site_aniso_U_13
  _atom_site_aniso_U_12
 Si1 0.0249(4) 0.0243(4) 0.0379(5) -0.0059(3) 0.0032(3) -0.0049(3)
 Si2 0.0245(4) 0.0270(4) 0.0419(5) -0.0082(3) 0.0069(3) -0.0016(3)
 O1 0.0353(10) 0.0297(10) 0.0485(14) -0.0113(8) 0.0004(9) 0.0012(7)
 O2 0.0288(9) 0.0403(10) 0.0528(14) -0.0132(10) 0.0115(9) -0.0084(8)
 C1 0.0340(14) 0.0365(14) 0.050(2) -0.0086(14) -0.0052(13) -0.0069(11)
 C2 0.0571(18) 0.0449(17) 0.042(2) 0.0002(15) -0.0022(15) 0.0006(14)
 C3 0.0507(19) 0.0466(18) 0.073(3) -0.0193(16) -0.0113(17) 0.0169(15)
 C4 0.059(2) 0.059(2) 0.044(2) -0.0122(16) 0.0202(17) -0.0163(16)

_geom_special_details
;
 All esds (except the esd in the dihedral angle between two l.s. planes)
 are estimated using the full covariance matrix.  The cell esds are taken
 into account individually in the estimation of esds in distances, angles
 and torsion angles; correlations between esds in cell parameters are only
 used when they are defined by crystal symmetry.  An approximate (isotropic)
 treatment of cell esds is used for estimating esds involving l.s. planes.
;
loop_
  _geom_bond_atom_site_label_1
  _geom_bond_atom_site_label_2
  _geom_bond_distance
  _geom_bond_site_symmetry_2
  _geom_bond_publ_flag
 Si1 O1 1.6253(18) . ?
 Si1 O2 1.6297(19) . ?
 Si1 C1 1.849(3) . ?
 Si1 C2 1.850(3) . ?
 Si2 O1 1.6299(18) 5_676 ?
 Si2 O2 1.6214(17) . ?
 Si2 C3 1.838(3) . ?
 Si2 C4 1.849(3) . ?
 O1 Si2 1.6299(18) 5_676 ?
 C1 H1A 0.9800 . ?
 C1 H1B 0.9800 . ?
 C1 H1C 0.9800 . ?
 C2 H2A 0.9800 . ?
 C2 H2B 0.9800 . ?
 C2 H2C 0.9800 . ?
 C3 H3A 0.9800 . ?
 C3 H3B 0.9800 . ?
 C3 H3C 0.9800 . ?
 C4 H4A 0.9800 . ?
 C4 H4B 0.9800 . ?
 C4 H4C 0.9800 . ?

loop_
  _geom_angle_atom_site_label_1
  _geom_angle_atom_site_label_2
  _geom_angle_atom_site_label_3
  _geom_angle
  _geom_angle_site_symmetry_1
  _geom_angle_site_symmetry_3
  _geom_angle_publ_flag
 O1 Si1 O2 109.00(10) . . ?
 O1 Si1 C1 108.07(11) . . ?
 O1 Si1 C2 109.64(12) . . ?
 O2 Si1 C1 107.60(13) . . ?
 O2 Si1 C2 110.03(13) . . ?
 C1 Si1 C2 112.41(14) . . ?
 O1 Si2 C3 107.89(13) 5_676 . ?
 O1 Si2 C4 110.39(13) 5_676 . ?
 O2 Si2 O1 109.65(10) . 5_676 ?
 O2 Si2 C3 110.45(13) . . ?
 O2 Si2 C4 107.60(14) . . ?
 C3 Si2 C4 110.88(16) . . ?
 Si1 O1 Si2 146.42(13) . 5_676 ?
 Si2 O2 Si1 145.81(14) . . ?
 Si1 C1 H1A 109.5 . . ?
 Si1 C1 H1B 109.5 . . ?
 Si1 C1 H1C 109.5 . . ?
 H1A C1 H1B 109.5 . . ?
 H1A C1 H1C 109.5 . . ?
 H1B C1 H1C 109.5 . . ?
 Si1 C2 H2A 109.5 . . ?
 Si1 C2 H2B 109.5 . . ?
 Si1 C2 H2C 109.5 . . ?
 H2A C2 H2B 109.5 . . ?
 H2A C2 H2C 109.5 . . ?
 H2B C2 H2C 109.5 . . ?
 Si2 C3 H3A 109.5 . . ?
 Si2 C3 H3B 109.5 . . ?
 Si2 C3 H3C 109.5 . . ?
 H3A C3 H3B 109.5 . . ?
 H3A C3 H3C 109.5 . . ?
 H3B C3 H3C 109.5 . . ?
 Si2 C4 H4A 109.5 . . ?
 Si2 C4 H4B 109.5 . . ?
 Si2 C4 H4C 109.5 . . ?
 H4A C4 H4B 109.5 . . ?
 H4A C4 H4C 109.5 . . ?
 H4B C4 H4C 109.5 . . ?

loop_
  _geom_torsion_atom_site_label_1
  _geom_torsion_atom_site_label_2
  _geom_torsion_atom_site_label_3
  _geom_torsion_atom_site_label_4
  _geom_torsion
  _geom_torsion_site_symmetry_1
  _geom_torsion_site_symmetry_2
  _geom_torsion_site_symmetry_3
  _geom_torsion_site_symmetry_4
  _geom_torsion_publ_flag
 O1 Si1 O2 Si2 65.2(3) . . . . ?
 O1 Si2 O2 Si1 -33.7(3) 5_676 . . . ?
 O2 Si1 O1 Si2 -77.9(3) . . . 5_676 ?
 C1 Si1 O1 Si2 165.4(2) . . . 5_676 ?
 C1 Si1 O2 Si2 -177.8(2) . . . . ?
 C2 Si1 O1 Si2 42.6(3) . . . 5_676 ?
 C2 Si1 O2 Si2 -55.0(3) . . . . ?
 C3 Si2 O2 Si1 85.1(3) . . . . ?
 C4 Si2 O2 Si1 -153.8(2) . . . . ?

_shelx_res_file
;
TITL 200_a.res in P4(2)/n
REM Old TITL 200 in P4(2)/n
REM SHELXT solution in P4(2)/n
REM R1 0.156, Rweak 0.004, Alpha 0.023, Orientation as input
REM Formula found by SHELXT: C2 O Si
CELL 0.71073 16.0373 16.0373 6.4481 90 90 90
ZERR 4 0.0019 0.0019 0.0017 0 0 0
LATT 1
SYMM 0.5-X,0.5-Y,+Z
SYMM -Y,0.5+X,0.5+Z
SYMM 0.5+Y,-X,0.5+Z
SFAC C H O Si
UNIT 32 96 16 16

L.S. 4
PLAN  5
SIZE 0.3 0.3 0.5
TEMP -73.15
CONF
BOND $H
list 4
fmap 2
acta
MORE -1
OMIT 4 14 0
REM <olex2.extras>
REM <HklSrc "%.\\200.hkl">
REM </olex2.extras>

WGHT    0.062200    0.493500
FVAR       0.45288
SI1   4    0.432091    0.885232    0.489043    11.00000    0.02495    0.02434 =
         0.03790   -0.00586    0.00321   -0.00491
SI2   4    0.611771    0.935564    0.359154    11.00000    0.02451    0.02701 =
         0.04191   -0.00818    0.00692   -0.00157
O1    3    0.388470    0.976068    0.515993    11.00000    0.03529    0.02973 =
         0.04848   -0.01128    0.00038    0.00122
O2    3    0.518684    0.896106    0.359569    11.00000    0.02880    0.04033 =
         0.05283   -0.01324    0.01149   -0.00842
C1    1    0.361686    0.819016    0.332645    11.00000    0.03401    0.03654 =
         0.05006   -0.00861   -0.00523   -0.00688
AFIX 137
H1A   2    0.311310    0.806490    0.412833    11.00000   -1.50000
H1B   2    0.390169    0.766892    0.296946    11.00000   -1.50000
H1C   2    0.346268    0.848573    0.205271    11.00000   -1.50000
AFIX   0
C2    1    0.453855    0.840031    0.747368    11.00000    0.05708    0.04490 =
         0.04205    0.00021   -0.00216    0.00064
AFIX 137
H2A   2    0.491953    0.876720    0.823485    11.00000   -1.50000
H2B   2    0.479569    0.785005    0.730669    11.00000   -1.50000
H2C   2    0.401575    0.834422    0.824804    11.00000   -1.50000
AFIX   0
C3    1    0.685149    0.865238    0.490723    11.00000    0.05073    0.04659 =
         0.07275   -0.01928   -0.01134    0.01692
AFIX 137
H3A   2    0.740294    0.891450    0.496876    11.00000   -1.50000
H3B   2    0.688940    0.812702    0.413672    11.00000   -1.50000
H3C   2    0.665349    0.854055    0.631791    11.00000   -1.50000
AFIX   0
C4    1    0.642510    0.951899    0.085757    11.00000    0.05943    0.05865 =
         0.04393   -0.01224    0.02015   -0.01632
AFIX 137
H4A   2    0.602333    0.989146    0.018440    11.00000   -1.50000
H4B   2    0.643313    0.898184    0.013322    11.00000   -1.50000
H4C   2    0.698175    0.977023    0.080618    11.00000   -1.50000
AFIX   0
HKLF 4

REM  200_a.res in P4(2)/n
REM R1 =  0.0572 for    1381 Fo > 4sig(Fo)  and  0.1177 for all    2530 data
REM     77 parameters refined using      0 restraints

END

WGHT      0.0623      0.4964

REM Highest difference peak  0.439,  deepest hole -0.221,  1-sigma level  0.070
Q1    1   0.5268  0.8904  0.4887  11.00000  0.05    0.44
Q2    1   0.4440  0.8865  0.3370  11.00000  0.05    0.34
Q3    1   0.5703  0.8991  0.3697  11.00000  0.05    0.33
Q4    1   0.6586  0.8998  0.3772  11.00000  0.05    0.32
Q5    1   0.6232  0.9402  0.2108  11.00000  0.05    0.32
;
_shelx_res_checksum                17366
_shelx_hkl_file
;
   0   1   0   -3.80    0.30
   1   0   0   -2.60    0.30
   0  -1   0   -3.50    0.30
  -1   1   0    2.60    0.40
  -1   1   0    3.50    0.50
   1  -1   0    4.40    0.50
  -1  -1   0    3.10    0.50
  -1  -1   0    2.10    0.50
   2   1   0   -9.10    1.10
  -2  -1   0   -5.70    1.30
   1  -2   0   -9.30    0.90
  -2  -1   0   -7.10    1.10
  -2   0   0 3955.30  193.48
   0  -2   0 4028.10  191.68
   0   2   0 4025.50  193.18
  -2   0   0 4395.36  193.58
   2   0   0 3961.80  193.98
   2   0   0 3892.31  192.18
   0  -2   0 3906.61  192.88
   1   2   0    0.00    0.40
  -1  -2   0   -0.60    1.00
   1   2   0    1.10    1.00
   2  -2   0  150.38    7.90
  -2  -2   0  150.18    8.30
  -2   2   0  153.78    8.00
   2  -2   0  149.99    7.70
   2   2   0  147.79    7.80
   2   2   0  151.98    8.30
   2  -3   0   -0.30    0.90
  -2   3   0   -0.90    0.70
   2  -3   0   -0.60    0.70
   3   2   0   -0.50    0.70
   3   2   0   -0.70    0.90
  -3  -2   0   -0.10    1.00
   1  -3   0    2.70    0.90
   3   1   0    0.90    0.90
  -1   3   0    1.10    0.90
  -3  -1   0    1.40    1.00
  -1   3   0    0.90    0.70
   1  -3   0    1.40    0.90
   3   1   0    2.00    0.80
   0  -3   0   -1.70    0.70
   3   0   0    0.10    0.50
   0   3   0   -1.60    0.60
   0   3   0   -0.30    0.60
   0  -3   0    0.30    0.70
   3   0   0   -0.50    0.40
  -3   0   0    0.20    0.60
   1   3   0   -0.50    0.60
  -1  -3   0    0.70    0.80
  -3   1   0    0.20    0.60
   3  -1   0   -0.10    0.50
   3  -1   0    0.10    0.60
  -1  -3   0   -0.30    0.90
   3  -2   0   -0.40    0.80
  -3   4   0   -1.70    0.90
  -4  -3   0    4.80    1.80
   3  -4   0   -0.60    1.30
   3  -4   0   -0.30    1.10
   4   3   0   -2.00    1.10
   4   3   0   -0.60    1.00
  -4  -2   0 9922.81  475.55
   4   2   0 9966.60  474.85
  -2   4   0 9999.00  473.05
   2  -4   0 9796.42  472.35
   2  -4   0 9869.41  470.65
   4   2   0 9759.02  471.15
  -4  -1   0    0.10    1.40
  -1   4   0    2.10    1.50
   1  -4   0    0.70    1.30
   0  -4   0 5474.75  260.77
  -4   0   0 5527.45  265.17
   4   0   0 5317.27  262.07
   0   4   0 5285.57  263.87
   4   0   0 5579.34  264.77
   0   4   0 5862.21  261.17
   0  -4   0 5358.96  261.27
   4  -1   0   -1.90    1.20
  -4   1   0   -1.80    1.10
  -2  -4   0  279.97   15.30
   2   4   0  282.97   15.10
   4  -2   0  260.07   14.80
  -4   2   0  265.07   14.70
   2   4   0  278.37   14.30
   4  -2   0  328.47   14.40
   4  -3   0   -1.20    1.10
   3   4   0    0.00    1.00
   3   4   0   -1.20    1.10
  -4   3   0   -0.70    1.00
  -3  -4   0    0.00    1.20
   4  -3   0    0.10    1.10
   4  -4   0 1183.28   56.09
   4  -4   0 1156.58   56.39
   4   4   0 1120.89   55.99
  -4  -4   0 1147.29   57.09
  -4   4   0 1199.88   56.49
   4   4   0 1153.78   56.99
  -5  -4   0   -2.70    1.50
  -4   5   0   -1.50    1.10
   5   4   0   -0.60    1.30
   4  -5   0   -0.30    1.30
   5   4   0   -2.30    1.50
   3  -5   0   11.00    2.20
  -5  -3   0    7.40    2.10
   3  -5   0    6.00    1.80
   5   3   0    9.70    1.80
  -3   5   0   10.50    2.00
   5   3   0   10.70    2.70
  -5  -2   0   -4.20    1.30
  -2   5   0   -2.60    1.20
   2  -5   0   -2.30    1.20
   5   2   0   -1.20    1.10
   5   2   0   -2.80    1.50
   2  -5   0   -4.10    1.30
  -1   5   0    8.00    2.10
   1  -5   0    4.80    1.90
   5   1   0    7.70    2.40
   1  -5   0    9.00    2.10
   5   1   0    7.00    1.60
  -5  -1   0    6.10    2.00
   5   0   0    2.00    1.00
   0   5   0    0.70    1.50
   0  -5   0    1.10    1.60
   5   0   0    0.70    1.40
  -5   0   0    2.50    1.30
   0  -5   0    2.00    1.60
  -1  -5   0   28.50    3.70
   5  -1   0   21.30    2.50
   5  -1   0   23.50    3.10
  -1  -5   0   29.70    3.30
  -5   1   0   23.50    2.80
  -1  -5   0   19.90    2.90
   5  -2   0   -0.50    1.20
  -2  -5   0    1.90    2.10
   5  -2   0   -0.40    1.20
  -5   2   0    0.50    1.10
   5  -3   0   56.99    4.70
   5  -3   0   53.89    4.40
   3   5   0   76.19    5.40
  -3  -5   0   65.89    5.40
  -5   3   0   60.09    4.60
  -4  -5   0    0.40    1.40
   5  -4   0   -1.10    1.20
   4   5   0    0.10    1.40
  -5   4   0   -0.50    1.10
   5  -4   0   -0.50    1.30
   5   5   0    6.80    2.30
  -5  -5   0   12.10    3.20
   5  -5   0    9.50    2.20
   5   5   0   11.10    2.10
   5  -5   0   11.60    2.50
  -5   5   0   11.30    2.30
   5  -6   0   -2.20    1.80
  -5   6   0   -1.40    1.20
   5  -6   0   -1.00    1.30
  -6  -5   0    1.00    1.80
   6   5   0    6.90    2.20
   6   5   0    6.00    1.70
   6   4   0 1135.49   56.09
   4  -6   0 1140.79   54.89
  -6  -4   0 1121.69   56.09
   6   4   0 1088.39   54.59
   4  -6   0 1139.59   55.19
  -4   6   0 1141.59   55.29
   3  -6   0   -1.90    1.40
  -3   6   0   -1.90    1.20
   6   3   0   -0.70    1.20
   3  -6   0    0.70    1.40
   6   3   0   -0.20    1.50
  -6  -3   0   -0.80    1.40
   2  -6   0 1795.42   85.89
  -2   6   0 1748.23   85.99
   6   2   0 1807.32   86.49
   6   2   0 1768.02   85.29
  -6  -2   0 1785.02   86.49
   2  -6   0 1779.12   85.49
  -6  -1   0   -3.70    1.20
   1  -6   0   -3.10    1.70
   6   1   0   -1.80    1.50
   1  -6   0   -3.80    1.20
  -1   6   0   -2.20    1.30
   6   1   0   -0.80    1.20
   0  -6   0  124.39    8.40
   0  -6   0  143.19    8.50
   0   6   0  138.79    8.70
   6   0   0  145.39    8.90
  -6   0   0  143.29    8.70
   6   0   0  137.09    7.70
  -1  -6   0   -3.10    2.00
   6  -1   0   -2.70    1.10
  -6   1   0   -3.90    1.30
  -1  -6   0   -5.90    1.90
   6  -1   0    2.20    1.80
  -1  -6   0   -5.70    1.60
  -2  -6   0   -2.90    3.00
  -2  -6   0    9.00    3.10
   6  -2   0   -0.80    1.60
   6  -2   0    2.90    1.90
  -2  -6   0    2.90    2.30
  -6   2   0    1.20    1.50
  -3  -6   0   -0.60    1.90
   6  -3   0   -0.90    1.30
   3   6   0    0.20    1.60
  -6   3   0   -1.50    1.30
   3   6   0   -0.50    1.20
   6  -4   0  941.91   43.50
  -6   4   0  942.71   43.30
   4   6   0  824.22   42.50
  -4  -6   0  826.12   43.90
   6  -4   0  868.41   42.70
   4   6   0  828.42   43.70
  -6   5   0    0.30    1.30
   6  -5   0   -0.80    1.60
  -5  -6   0    1.10    2.10
   5   6   0    0.70    1.80
   6  -5   0   -0.70    1.40
   5   6   0   -1.10    1.50
   6  -6   0  115.39    7.90
   6   6   0  109.79    8.50
  -6   6   0  112.69    7.80
   6   6   0  114.79    7.40
   6  -6   0  134.49    8.00
  -6  -6   0  114.59    8.90
  -7  -6   0    0.10    2.10
   7   6   0    2.30    1.70
   6  -7   0   -2.80    1.90
   7   6   0   -0.20    2.00
  -6   7   0   -2.30    1.50
   6  -7   0   -3.10    1.50
   5  -7   0   -1.90    2.10
  -7  -5   0   -1.60    1.70
   5  -7   0   -2.00    1.70
   7   5   0    0.20    1.60
   7   5   0   -0.30    2.00
  -5   7   0   -1.30    1.50
   4  -7   0    1.60    1.70
  -4   7   0    0.40    1.60
   7   4   0   -1.40    1.70
   4  -7   0   -3.30    2.00
   7   4   0    0.20    1.40
  -7  -4   0    0.10    1.80
   3  -7   0    9.70    2.70
   7   3   0   14.80    2.40
   7   3   0   17.90    3.30
   3  -7   0   19.40    3.00
  -3   7   0   17.50    3.10
  -7  -3   0   20.60    3.30
   2  -7   0   -1.80    2.10
   2  -7   0    4.10    1.80
   7   2   0   -3.10    1.20
   7   2   0   -1.30    1.50
  -7  -2   0   -2.00    1.40
   1  -7   0    3.20    2.00
  -7  -1   0    0.40    1.50
   7   1   0    3.20    1.40
   7   1   0    1.00    1.70
   1  -7   0    0.50    1.60
  -1   7   0   -0.20    1.60
   7   0   0    0.00    1.50
  -7   0   0    7.20    1.90
   7   0   0    2.10    1.30
  -7   1   0   24.20    3.30
   7  -1   0   17.00    3.10
   7  -1   0   21.60    2.90
  -1  -7   0   27.00    3.80
  -1  -7   0   28.00    4.20
   7  -2   0   -0.70    1.30
  -2  -7   0    0.10    2.20
   7  -2   0   -0.60    1.60
  -7   2   0    0.00    1.30
  -2  -7   0   -1.10    2.80
  -2  -7   0   -1.30    2.00
   3   7   0    4.10    1.70
   7  -3   0    2.60    2.00
   7  -3   0    3.90    1.80
  -3  -7   0    3.30    2.90
  -7   3   0    1.50    1.70
  -3  -7   0    5.20    2.60
   5   7   0    0.90    2.10
  -7   5   0    1.30    1.60
   7  -5   0    1.00    1.80
   5   7   0    3.40    1.90
   7  -5   0    0.70    1.90
  -5  -7   0    3.10    2.40
  -6  -7   0   -0.60    2.40
   7  -6   0   -2.50    1.80
   6   7   0   -4.30    1.60
   7  -6   0   -2.80    1.90
   6   7   0   -1.30    1.80
  -7   6   0   -1.50    1.60
   7   7   0   34.10    4.60
  -7  -7   0   32.70    5.20
   7   7   0   37.70    5.50
  -7   7   0   31.90    4.40
   7  -7   0   40.10    5.10
   7  -7   0   28.10    4.30
   7  -8   0   -0.40    2.30
   7  -8   0    2.60    2.90
   8   7   0   -0.50    2.00
  -7   8   0   -1.50    1.90
   8   7   0    0.30    2.30
  -8  -7   0   -1.90    2.60
   8   6   0  344.77   19.10
   6  -8   0  353.06   19.90
  -8  -6   0  365.46   21.10
  -6   8   0  354.56   19.90
   8   6   0  366.16   21.00
   6  -8   0  389.86   20.00
  -8  -5   0   -0.60    2.30
  -5   8   0   -4.50    1.90
   8   5   0   -2.90    1.80
   5  -8   0   -3.60    1.90
   8   5   0    0.20    2.50
   4  -8   0 1797.02   86.99
   4  -8   0 1848.22   87.39
   8   4   0 1757.72   86.59
  -4   8   0 1816.22   87.59
  -8  -4   0 1780.72   88.29
   8   4   0 1782.82   88.39
   8   3   0   -0.90    1.90
   3  -8   0   -1.10    1.60
   8   3   0    0.50    1.60
   3  -8   0   -0.90    2.10
  -3   8   0   -1.00    1.70
  -8  -3   0   -0.40    1.80
   2  -8   0  910.91   44.90
   8   2   0  900.61   45.60
   8   2   0  903.41   44.10
  -8  -2   0  910.21   45.50
  -2   8   0  860.91   45.10
   2  -8   0  905.71   44.60
   8   1   0    0.40    1.90
  -8  -1   0   -2.00    1.70
   1  -8   0   -1.70    2.00
   8   1   0   -0.70    1.30
  -1   8   0    0.10    1.90
   1  -8   0   -0.10    1.60
   8   0   0   99.69    7.60
   0   8   0   95.29    7.40
   0  -8   0   93.59    7.20
   8   0   0   89.49    6.10
   0  -8   0  105.29    7.50
  -8   0   0   89.09    7.10
   8  -1   0   -1.70    1.50
  -1  -8   0   -0.90    2.10
  -8   1   0   -0.80    1.60
   8  -1   0   -0.70    1.20
  -1  -8   0   -1.00    2.00
  -1  -8   0   -0.40    2.60
  -2  -8   0  257.57   16.10
  -2  -8   0  271.17   16.10
   8  -2   0  283.27   14.80
  -8   2   0  296.07   15.60
   8  -2   0  280.67   16.00
  -2  -8   0  258.67   15.80
  -8   3   0   -0.30    1.60
   8  -3   0    0.60    2.00
   8  -3   0   -1.40    1.80
   3   8   0   -0.70    1.70
  -3  -8   0    4.90    2.90
  -3  -8   0   -0.30    2.30
   4   8   0  808.32   39.20
  -8   4   0  795.82   39.90
  -4  -8   0  813.32   41.10
   8  -4   0  790.72   40.40
   8  -4   0  761.12   39.30
  -5  -8   0   -1.40    2.20
   8  -5   0    1.00    2.20
   5   8   0   -2.30    1.80
  -8   5   0   -0.90    1.40
   8  -5   0   -2.70    1.90
   5   8   0   -2.10    1.90
   8  -6   0    5.20    2.70
   8  -6   0    7.20    2.90
   6   8   0    1.50    2.20
  -6  -8   0    6.00    3.80
   6   8   0    7.00    3.10
  -8   6   0    7.90    2.40
   8  -7   0   -3.90    2.20
   7   8   0   -2.20    2.10
  -8   7   0   -2.70    1.80
   8  -7   0    0.20    2.50
  -7  -8   0   -2.60    2.90
   7   8   0   -1.40    2.00
   8   8   0 1527.75   75.69
   8  -8   0 1617.24   76.59
  -8  -8   0 1555.34   78.19
   8   8   0 1483.05   77.59
   8  -8   0 1567.24   76.99
  -8   8   0 1594.74   76.89
  -9  -8   0   -1.40    3.30
  -8   9   0   -0.80    2.70
   8  -9   0   -2.30    2.60
   8  -9   0   -7.10    3.50
   9   8   0   -4.80    2.70
   9   8   0   -0.40    2.80
  -9  -7   0   29.50    5.70
   7  -9   0   41.10    5.80
   9   7   0   22.20    4.90
   9   7   0   24.50    4.10
   9   6   0    3.60    2.50
  -6   9   0   -2.30    2.20
   9   6   0   -1.60    2.70
  -9  -6   0   -0.30    3.00
   6  -9   0   -8.00    2.90
   6  -9   0   -2.80    2.10
   5  -9   0   15.70    3.50
   9   5   0   18.40    3.30
  -9  -5   0   16.50    4.00
  -5   9   0   17.60    4.00
   9   5   0   15.00    4.40
   5  -9   0   16.50    4.20
   9   4   0   -0.80    2.30
  -9  -4   0    7.00    2.70
   9   4   0    5.10    2.20
   4  -9   0   -1.80    1.90
   4  -9   0   -5.90    2.70
  -4   9   0   -2.50    2.10
  -9  -3   0    7.00    2.90
  -3   9   0    9.50    3.00
   9   3   0    9.70    2.40
   3  -9   0    5.40    2.40
   9   3   0   10.10    3.10
   9   2   0   -0.10    1.70
  -2   9   0    3.30    2.20
  -9  -2   0   -0.20    1.80
   9   2   0   -1.80    2.00
   2  -9   0   -2.40    2.40
   2  -9   0   -1.30    2.10
   1  -9   0   29.90    4.50
  -1   9   0   29.30    4.60
   9   1   0   37.50    4.00
   9   1   0   40.20    5.60
  -9  -1   0   39.40    5.00
   1  -9   0   38.00    4.70
   0  -9   0   -2.10    2.60
   9   0   0   -0.90    1.60
  -9   0   0    6.70    2.10
   0  -9   0   -5.80    2.20
   9  -2   0   -1.30    1.80
  -2  -9   0   -1.80    2.20
  -2  -9   0   -2.40    2.50
   9  -2   0    0.00    2.10
  -2  -9   0   -2.60    3.50
  -9   2   0    0.30    1.80
   9  -3   0    5.40    2.80
  -9   3   0    3.90    2.20
   9  -3   0    5.20    2.20
   3   9   0    1.80    2.20
  -3  -9   0    2.30    4.10
  -3  -9   0    1.80    3.60
  -4  -9   0    3.40    3.50
  -9   4   0   -2.50    1.70
   9  -4   0   -3.60    1.80
  -9   5   0    6.30    2.70
  -5  -9   0   15.70    3.90
   5   9   0   13.10    3.00
   9  -5   0   11.60    3.20
   6   9   0    0.70    2.10
  -9   6   0   -1.70    2.00
   9  -6   0   -4.90    2.20
  -6  -9   0   -2.00    2.90
   6   9   0   -2.80    2.20
   9  -6   0    1.90    2.70
   7   9   0    6.90    2.90
  -9   7   0   -0.20    2.50
   9  -7   0    2.40    3.30
   9  -7   0    2.90    3.00
  -7  -9   0    2.90    4.70
   7   9   0    4.90    3.40
   9  -8   0    2.20    3.10
   9  -8   0   12.70    4.10
  -9   8   0    3.50    2.80
  -9  -9   0    3.50    3.90
   9   9   0   -1.00    3.10
   9  -9   0    2.60    3.30
  -9   9   0    2.40    2.70
   9   9   0    4.70    3.20
   9  -9   0   -0.20    3.90
  10   9   0    5.60    3.60
  -9  10   0   -0.60    2.90
   9 -10   0   -2.70    4.00
 -10  -9   0   -0.80    3.60
   8 -10   0 1139.19   58.39
  10   8   0 1124.39   59.49
   8 -10   0 1198.08   58.39
  -8  10   0 1166.18   58.49
  10   8   0 1145.79   57.19
 -10  -8   0 1164.68   59.89
  -7  10   0    0.90    2.90
  10   7   0   -0.10    2.60
  10   7   0   -1.00    3.00
 -10  -7   0   -1.30    3.10
   7 -10   0   -1.40    2.40
  10   6   0  483.95   25.90
   6 -10   0  511.15   27.10
  -6  10   0  494.05   27.10
  10   6   0  508.85   28.30
 -10  -6   0  493.35   28.10
   6 -10   0  485.35   26.90
   5 -10   0   -4.60    2.30
  10   5   0   -5.80    2.90
 -10  -5   0   -5.30    2.80
   5 -10   0    0.30    3.30
  10   5   0    1.40    2.30
  -5  10   0   -1.40    2.50
  10   4   0 2268.67  113.29
   4 -10   0 2302.37  112.09
 -10  -4   0 2344.67  113.39
  10   4   0 2367.56  111.29
   4 -10   0 2338.57  111.79
  -4  10   0 2230.88  112.29
  -3  10   0    1.50    2.70
 -10  -3   0    5.90    2.80
  10   3   0    7.10    3.20
   3 -10   0   -0.70    2.30
   3 -10   0   -3.90    3.30
  10   3   0    3.50    2.30
   2 -10   0 2588.64  127.29
  -2  10   0 2672.33  128.29
 -10  -2   0 2706.43  128.59
  10   2   0 2630.44  126.69
  10   2   0 2603.74  128.69
   2 -10   0 2643.14  127.69
   1 -10   0    7.40    3.00
 -10  -1   0   -3.60    2.30
  10   1   0    0.10    2.60
  10   1   0   -0.50    1.90
   1 -10   0   -4.60    3.10
  -1  10   0    1.60    3.10
 -10   0   0   44.20    5.70
  10   0   0   25.60    4.90
   0 -10   0   36.10    5.40
   0 -10   0   34.80    5.20
  10   0   0   31.00    4.30
  10  -1   0   -1.30    2.00
  -1 -10   0    0.80    2.70
 -10   1   0   -3.50    2.00
  -1 -10   0    9.50    3.90
  10  -1   0   -1.80    2.30
  -1 -10   0   -5.20    3.90
  10  -2   0  184.98   11.60
  -2 -10   0  203.98   13.50
  -2 -10   0  204.28   14.00
 -10   2   0  188.98   12.50
  10  -2   0  179.38   13.00
  -2 -10   0  236.28   13.90
  10  -3   0    1.50    2.70
  -3 -10   0   -5.70    3.60
  10  -3   0    0.30    2.50
   3  10   0   -0.20    2.20
 -10   3   0    1.20    2.10
  -3 -10   0   -4.70    4.00
   4  10   0  251.47   13.90
  10  -4   0  186.88   14.80
  -4 -10   0  277.97   17.20
  -4 -10   0  268.37   16.30
  10  -5   0    3.40    2.80
   5  10   0    6.40    2.50
  -5 -10   0    1.50    3.20
  10  -5   0   -1.60    2.50
  -5 -10   0   -1.00    3.80
 -10   5   0   -2.10    2.20
  -6 -10   0   55.79    7.90
  10  -6   0   50.99    6.70
 -10   6   0   47.50    6.40
   6  10   0   59.19    6.50
  10  -6   0   48.00    6.70
  -7 -10   0   -6.30    4.00
   7  10   0   -1.60    3.00
   7  10   0   10.90    3.20
  10  -7   0    0.30    3.10
   8  10   0  125.89   11.20
  10  -8   0  123.09   10.40
  -8 -10   0  115.49   11.70
  10  -8   0  109.29    9.80
 -10   8   0  107.29    9.20
   8  10   0  107.79    8.80
  10  -9   0   -5.20    3.70
  -9 -10   0   -2.70    3.70
   9  10   0    0.00    3.00
 -10   9   0    1.20    2.70
  10  -9   0    4.10    3.30
   9  10   0   -1.80    3.30
  10  10   0   21.90    5.40
  10 -10   0   23.40    5.70
 -10 -10   0   28.90    6.30
  10  10   0   29.70    4.80
  10 -11   0   -3.60    3.90
  11  10   0    4.60    3.10
 -11  -9   0   20.20    5.40
  11   9   0   18.50    4.00
  11   9   0   22.90    7.50
   9 -11   0   23.60    5.70
  11   8   0   -3.90    2.80
  11   8   0   -4.10    2.80
 -11  -8   0   10.60    4.10
   8 -11   0   -5.80    4.10
  -8  11   0   -1.70    2.80
   8 -11   0   -2.90    2.80
  -7  11   0    6.80    3.60
   7 -11   0   -5.50    4.00
   7 -11   0    2.60    3.00
 -11  -7   0    0.90    3.60
  11   7   0    1.60    2.80
  11   7   0   -1.10    3.00
 -11  -6   0    0.00    2.90
  11   6   0    0.40    3.20
   6 -11   0   -1.60    2.60
  11   6   0   -2.70    2.60
   6 -11   0   -4.50    3.70
  -6  11   0    1.80    2.90
   5 -11   0   35.60    5.20
 -11  -5   0   34.70    6.00
   5 -11   0   34.70    5.70
  -5  11   0   34.50    5.40
  11   5   0   38.50    6.20
  11   5   0   41.40    5.70
  11   4   0    2.70    2.60
 -11  -4   0   -4.50    2.90
  11   4   0   -1.40    3.40
   4 -11   0   -2.30    2.70
 -11  -3   0    7.70    3.80
  11   3   0    2.00    3.50
  -3  11   0   -3.00    3.50
  11   3   0    4.00    2.60
   3 -11   0   -3.70    2.90
   3 -11   0    7.50    4.30
  11   2   0    0.90    3.00
 -11  -2   0    1.40    2.90
  11   2   0   12.00    2.90
   2 -11   0    3.90    4.00
  11   1   0    9.50    4.00
 -11  -1   0    6.50    3.40
  -1  11   0    5.80    3.40
  11   1   0    9.20    2.80
   1 -11   0    8.80    3.50
   1 -11   0   -1.90    4.50
   0 -11   0   -8.10    3.70
  11   0   0   -4.80    2.80
   0 -11   0   -2.40    2.70
  11   0   0   -2.60    2.10
 -11   0   0   -1.70    2.30
  -1 -11   0   -4.10    3.20
  -1 -11   0   -4.50    3.00
  11  -1   0   -1.20    2.70
  -1 -11   0  -10.40    4.30
  11  -1   0    2.40    2.50
 -11   1   0   -0.50    2.20
 -11   2   0   -0.40    2.50
  11  -2   0    0.80    2.80
  11  -2   0    0.80    2.40
  11  -3   0    6.70    3.20
  11  -3   0   16.00    4.40
   3  11   0   15.10    3.40
 -11   3   0    5.20    3.30
  -3 -11   0   10.10    4.60
  -3 -11   0    6.00    5.40
  -4 -11   0   12.30    5.50
  11  -4   0   -5.60    2.70
   4  11   0   -9.00    3.20
 -11   4   0   -5.30    2.50
  -4 -11   0   -2.60    5.10
  11  -5   0   46.50    5.90
 -11   5   0   47.50    6.40
  11  -5   0   65.79    8.00
  11  -6   0    1.00    3.10
  11  -6   0   -4.50    2.70
  -6 -11   0   10.40    4.50
 -11   6   0   -4.20    2.40
  -7 -11   0   22.30    5.80
   7  11   0   19.90    4.10
  11  -7   0   23.90    5.40
 -11   7   0   18.20    4.30
   8  11   0   -2.00    3.10
 -11   8   0    2.40    2.80
  -8 -11   0   -1.40    4.60
   8  11   0   -2.40    3.10
  11  -8   0   -0.80    3.40
  11  -8   0    1.60    3.40
  11  -9   0    5.60    4.20
  -9 -11   0    4.20    4.10
   9  11   0    7.20    4.20
  11 -10   0   -1.80    3.70
  10  11   0   -2.30    2.80
  11 -11   0   -3.20    4.20
  11  11   0   -0.10    2.90
  12  11   0   -2.80    2.80
  11 -12   0    0.90    4.80
  10 -12   0   21.70    6.20
  12  10   0   26.80    4.80
   9 -12   0   -0.90    4.20
  12   9   0    1.00    3.00
  12   8   0    7.90    3.30
   8 -12   0   -7.20    4.10
   7 -12   0   -7.50    3.90
  -7  12   0   -0.80    2.70
  12   7   0   -1.50    3.20
 -12  -7   0    1.60    3.30
  12   7   0    1.80    2.90
   6 -12   0  310.47   19.90
  12   6   0  320.67   21.00
  -6  12   0  318.57   19.70
  12   6   0  331.57   18.60
 -12  -6   0  342.97   21.10
   6 -12   0  341.97   19.70
  12   5   0   -1.00    2.60
   5 -12   0   -0.80    3.90
   5 -12   0   -2.40    2.50
  12   5   0   -2.50    3.40
  -5  12   0    3.70    3.20
 -12  -5   0   -3.00    3.00
   4 -12   0   62.19    7.10
  12   4   0   61.69    8.30
   4 -12   0   70.39    8.30
  12   4   0   69.99    6.70
 -12  -4   0   66.49    8.30
  -4  12   0   60.49    8.00
  -3  12   0   -4.70    3.30
   3 -12   0   -3.10    2.80
  12   3   0   -4.60    3.00
 -12  -3   0   -2.20    2.90
   3 -12   0    1.80    3.70
  12   3   0   -4.70    2.40
  -2  12   0 1305.77   65.99
   2 -12   0 1264.27   64.69
  12   2   0 1324.37   66.59
  12   2   0 1326.97   64.09
 -12  -2   0 1331.97   66.19
   2 -12   0 1272.97   65.09
  12   1   0    1.70    3.40
  -1  12   0    0.60    3.00
 -12  -1   0    0.70    3.20
   1 -12   0  -10.40    4.20
  12   1   0   -1.20    2.50
   1 -12   0   -2.10    3.30
  12   0   0  170.08   13.60
   0 -12   0  169.98   13.00
 -12   0   0  183.68   13.00
   0 -12   0  208.68   13.70
  12   0   0  184.08   11.70
  -1 -12   0  -11.50    5.40
  -1 -12   0   -0.90    4.20
 -12   1   0   -4.40    2.60
  12  -1   0   -1.90    2.90
  -1 -12   0    0.50    3.80
  12  -1   0   -0.60    3.40
  12  -2   0 2296.57  114.09
  -2 -12   0 2287.97  114.89
 -12   2   0 2440.26  115.39
  12  -2   0 2347.57  116.19
  -2 -12   0 2364.16  115.39
  -2 -12   0 2430.96  116.29
  12  -3   0   -0.20    3.00
  -3 -12   0    5.10    4.70
   3  12   0    8.00    3.10
 -12   3   0   -1.80    2.70
  12  -3   0   -4.30    3.00
  -3 -12   0    4.00    4.20
   4  12   0  310.07   17.10
  12  -4   0  298.97   19.20
 -12   4   0  307.07   18.10
  12  -4   0  292.37   17.40
  -4 -12   0  295.37   19.60
  -4 -12   0  295.27   21.20
  -5 -12   0   10.20    5.40
  -5 -12   0    3.40    4.40
   5  12   0    5.80    3.20
  -6 -12   0  541.15   31.60
  12  -6   0  528.35   30.70
 -12   6   0  561.14   29.80
   6  12   0  548.25   28.40
  12  -6   0  559.34   29.50
  -6 -12   0  536.45   31.00
  -7 -12   0   -6.10    4.00
   7  12   0    1.10    2.90
  12  -7   0    1.70    3.80
  -8 -12   0  986.80   52.79
   8  12   0  976.90   49.20
  12  -8   0  987.00   50.49
   9  12   0   -2.60    2.90
  12  -9   0    2.50    3.90
  10  12   0   78.09    7.80
  12 -10   0   70.69    9.60
  12 -11   0   -9.30    4.60
  11  12   0   -5.10    2.90
  12  12   0    8.30    3.90
  12 -12   0   10.80    5.80
  13  12   0   -1.90    3.40
  12 -13   0    4.00    5.50
  13  11   0   -0.80    3.20
  11 -13   0    3.00    5.40
  10 -13   0   -0.10    4.60
  13  10   0   -3.00    3.10
   9 -13   0    2.80    5.00
  13   9   0   11.30    3.70
  13   8   0   -6.40    2.80
   8 -13   0   -7.60    4.40
   7 -13   0    0.40    4.40
  13   7   0   17.00    3.80
   6 -13   0   -2.60    4.40
  13   6   0   -0.80    2.60
  13   5   0   14.00    6.70
  -5  13   0   14.80    4.70
  13   5   0   13.40    3.60
   5 -13   0    3.90    4.50
 -13  -5   0    9.00    4.30
   5 -13   0   14.30    4.20
  13   4   0   -4.30    3.20
   4 -13   0   -0.60    2.80
   4 -13   0   -6.70    3.40
  13   4   0   -1.50    2.60
  -4  13   0    0.60    3.40
 -13  -4   0   -4.50    2.60
   3 -13   0   14.90    4.20
  -3  13   0   20.90    5.70
  13   3   0   18.50    4.10
  13   3   0   21.00    5.20
   3 -13   0   21.60    5.40
 -13  -3   0   24.00    5.30
  -2  13   0    2.70    3.80
   2 -13   0   10.20    4.20
   2 -13   0   11.50    3.50
  13   2   0   15.10    3.50
 -13  -2   0    5.50    3.50
  13   2   0    4.50    3.60
 -13  -1   0    0.70    3.20
  13   1   0    4.20    3.70
   1 -13   0   19.50    5.10
  13   1   0   -3.70    2.90
   1 -13   0    3.40    3.60
   0 -13   0    1.00    3.90
   0 -13   0    0.10    5.20
   0 -13   0    7.40    3.80
  13   0   0    3.10    3.30
  13   0   0    3.80    3.70
 -13   0   0    2.00    3.30
  13  -1   0    2.80    3.10
  -1 -13   0   11.60    4.70
  -1 -13   0   -0.70    5.30
  13  -1   0   -1.10    3.60
 -13   1   0   -3.80    3.30
  -1 -13   0    5.70    3.90
  -2 -13   0   19.30    4.60
  13  -2   0   12.40    3.60
  -2 -13   0   12.90    5.00
 -13   3   0    5.00    3.60
  -3 -13   0   16.30    6.10
  13  -3   0   -2.10    3.60
  13  -3   0    3.40    3.90
 -13   4   0   -2.50    3.00
  -4 -13   0    9.20    4.90
  -4 -13   0    9.10    6.60
   4  13   0    3.90    3.60
  13  -4   0   10.80    3.70
  13  -4   0   -2.00    3.30
  -5 -13   0   59.89    9.90
  -5 -13   0   60.79    9.30
   5  13   0   46.60    6.60
  13  -5   0   57.49    7.00
   6  13   0    2.20    3.20
  -6 -13   0    1.00    4.20
  13  -6   0   -1.40    3.40
  -7 -13   0    4.70    4.40
   7  13   0   17.10    4.00
   8  13   0    2.50    3.40
  13  -8   0    3.90    4.20
   9  13   0   18.60    4.60
  13  -9   0   15.30    5.60
  10  13   0    2.10    3.30
  13 -10   0    7.60    5.00
  13 -11   0   12.60    5.80
  11  13   0   13.80    4.20
  13 -12   0    3.50    5.70
  12  13   0    0.00    3.40
  13 -13   0    4.80    6.00
  13  13   0   -1.50    3.60
  14  13   0    0.50    3.80
  13 -14   0    5.70    6.50
  14  12   0   32.70    5.90
  12 -14   0   35.00    8.10
  14  11   0    1.40    3.80
  11 -14   0   -1.10    5.70
  10 -14   0  539.55   31.80
  14  10   0  534.65   29.00
   9 -14   0   -1.20    4.90
  14   9   0    2.10    3.10
   8 -14   0  116.39   12.10
  14   8   0  113.09    9.50
   7 -14   0    0.50    4.70
  14   7   0   -1.30    2.90
   6 -14   0   95.39   10.50
  14   6   0   89.19    8.40
   5 -14   0   -3.30    4.30
  14   5   0    0.70    2.90
   4 -14   0  276.27   17.40
  14   4   0  268.97   16.30
  -3  14   0   -0.60    4.40
   3 -14   0    1.20    4.00
  14   3   0    1.30    2.80
   2 -14   0    4.20    4.70
   2 -14   0    2.40    3.40
  14   2   0    6.80    3.20
  -2  14   0    3.50    3.80
   1 -14   0   -0.10    3.40
   1 -14   0    0.70    4.70
  14   1   0   -1.10    2.80
   0 -14   0   58.59    9.00
  14   0   0   51.59    6.90
   0 -14   0   60.59    8.00
   0 -14   0   71.59    8.60
  -1 -14   0   -0.30    3.70
  -1 -14   0   -0.10    3.40
  -1 -14   0   -7.30    5.00
  14  -1   0   -2.00    3.00
  14  -2   0  499.65   27.10
  -2 -14   0  488.55   28.30
  -2 -14   0  506.55   29.70
  -3 -14   0   -1.20    4.60
  14  -3   0    2.30    3.40
  -3 -14   0   -2.30    4.30
   3  14   0    4.00    3.10
   4  14   0  184.58   12.10
  -4 -14   0  205.78   15.50
  -5 -14   0   -4.40    4.80
  14  -5   0   -4.10    3.50
   5  14   0   -1.20    3.40
   6  14   0  189.08   12.00
  14  -6   0  180.28   13.40
  -6 -14   0  172.38   15.50
  14  -7   0   -4.90    3.80
   7  14   0    4.20    3.60
   8  14   0  276.57   18.10
  14  -8   0  378.56   21.10
   9  14   0    3.30    3.50
  14  -9   0   -1.40    4.50
  10  14   0   60.49    7.20
  14 -10   0   14.50    6.20
  14 -11   0   -2.60    5.00
  11  14   0    1.90    3.40
  12  14   0  325.97   19.10
  14 -12   0  310.17   22.30
  13  14   0   -1.00    3.60
  14 -13   0    3.00    5.90
  14 -14   0  274.47   21.70
  14  14   0  260.47   17.00
  15  14   0   -5.20    3.60
  15  13   0   -1.50    4.00
  12 -15   0   -0.80    8.90
  15  12   0   -6.00    3.60
  11 -15   0   15.30    7.90
  15  11   0    9.60    4.40
  10 -15   0    5.20    6.20
  15  10   0   -2.70    3.40
  15   9   0    2.20    3.60
   9 -15   0    3.20    5.90
  15   8   0    1.50    3.30
   8 -15   0   -3.80    5.00
  15   7   0   22.60    5.00
   7 -15   0   21.40    6.60
  15   6   0   -0.80    3.30
   6 -15   0   -4.90    5.20
  15   5   0    0.30    3.30
   5 -15   0    0.90    5.80
  15   4   0   -0.90    3.00
  15   3   0   -3.10    2.80
  15   2   0   -1.70    3.00
  15   1   0   -1.60    3.10
   0 -15   0   -6.70    3.50
  15   0   0    0.00    3.00
  15  -1   0    9.20    3.80
  -1 -15   0    6.50    4.20
  15  -2   0    2.50    3.50
  -2 -15   0    8.70    5.10
  -3 -15   0    0.30    5.40
  15  -4   0    0.00    3.70
  -4 -15   0   -8.90    5.70
  15  -5   0    2.20    4.20
  15  -7   0   -3.00    4.20
  15  -8   0    1.60    4.60
  15  -9   0   15.00    6.10
  15 -10   0   -9.90    4.60
  15 -11   0    5.60    6.00
  15 -12   0   -8.80    5.30
  15 -13   0    4.60    6.70
  15 -14   0    4.40    7.20
  16  14   0   20.70    5.70
  16  13   0   -3.60    3.80
  16  12   0   12.20    4.90
  16  11   0   -3.30    3.60
  16  10   0  169.78   13.00
  16   9   0   -2.30    3.50
  16   8   0   61.49    8.10
  16   7   0   -3.70    3.30
  16   6   0  104.79    9.70
  16   5   0   -1.00    3.40
  16   4   0  420.46   23.80
  16   3   0    3.30    3.50
  16   2   0   66.59    8.40
   1 -16   0    2.60    4.50
  16   1   0    1.00    3.30
   0 -16   0  337.17   22.20
  16   0   0  299.47   18.90
  -1 -16   0    4.30    4.20
  16  -1   0   -3.20    3.50
  16  -2   0  166.88   12.90
  -2 -16   0  182.18   17.20
  16  -3   0   -5.60    3.70
  16  -4   0   23.80    5.70
  16  -5   0   -2.70    4.10
  16  -6   0   13.90    5.30
  16  -7   0    0.60    4.60
  16  -8   0    0.40    4.90
  16  -9   0   -5.90    4.90
  16 -10   0   61.89    9.90
  16 -11   0   -0.70    6.00
  16 -12   0  165.28   16.70
  16 -13   0    5.10    6.90
  16 -14   0   62.69   11.50
  17  14   0   -3.20    6.90
  17  13   0   -2.60    4.20
  17  12   0   -1.80    4.10
  17  11   0   -3.80    3.90
  17  10   0   -0.40    4.10
  17   9   0   -1.40    3.80
  17   8   0   -6.40    3.40
  17   7   0   13.00    4.70
  17   6   0    3.60    3.80
  17   5   0    7.20    4.30
  17   4   0    5.60    4.10
  17   3   0   -0.20    3.70
  17   2   0   -0.60    3.90
  17   1   0    6.90    4.40
  17   0   0   -2.70    3.70
  17  -1   0   -3.20    4.30
  17  -2   0   -4.50    4.30
  17  -3   0    8.50    4.90
  17  -4   0   -4.90    4.20
  17  -5   0    1.60    4.90
  17  -6   0    0.50    4.90
  17  -7   0    0.90    5.10
  17  -8   0    6.40    5.70
  17  -9   0   -0.80    5.80
  17 -10   0   -1.10    5.80
  17 -11   0   15.60    7.00
  17 -12   0   -2.00    6.30
  17 -13   0    6.10    7.50
  17 -14   0    0.30    7.60
  18  13   0   -3.90    4.40
  18  12   0   27.50    6.30
  18  11   0    2.70    4.60
  18  10   0  113.49   11.30
  18   9   0    0.90    4.10
  18   8   0    0.40    4.10
  18   7   0   -5.80    3.60
  18   6   0    2.20    4.30
  18   5   0   -1.60    4.50
  18   4   0    1.70    4.50
  18   3   0   -4.80    3.90
  18   2   0   62.59    8.40
  18   1   0   -0.50    4.20
  18   0   0  196.28   15.10
  18  -1   0    6.50    5.00
  18  -2   0  202.38   15.80
  18  -3   0    0.80    4.80
  18  -4   0   -0.50    4.80
  18  -5   0   -1.70    4.80
  18  -6   0  166.08   14.90
  18  -7   0    1.40    5.80
  18  -8   0  107.29   13.70
  18  -9   0  -15.00    6.00
  18 -10   0    7.30    6.90
  18 -11   0   -4.50    6.40
  18 -12   0   53.09   11.40
  18 -13   0    9.40    8.50
  18 -14   0    1.50    7.70
  19  12   0    3.40    5.10
  19  11   0    4.50    5.10
  19  10   0    0.60    4.90
  19   9   0   17.20    5.90
  19   8   0   17.40    5.50
  19   7   0    3.60    4.80
  19   6   0   -3.40    4.60
  19   5   0   -1.20    4.60
  19   4   0   -2.30    4.70
  19   3   0    1.40    4.90
  19   2   0    0.30    4.80
  19   1   0    5.20    5.20
  19   0   0    1.30    5.00
  19  -1   0   -8.00    4.90
  19  -2   0   -1.90    4.90
  19  -3   0    3.50    5.20
  19  -4   0   -5.40    4.70
  19  -5   0    0.20    5.30
  19  -6   0    4.30    5.80
  19  -7   0   -1.30    5.90
  19  -8   0  -13.30    6.10
  19  -9   0   -8.50    6.10
  19 -10   0   -1.20    7.00
  19 -11   0    7.70    8.00
  19 -12   0    9.20    8.10
  20  11   0    4.60    5.40
  20  10   0  270.37   19.30
  20   9   0    2.10    5.40
  20   8   0   10.60    5.90
  20   7   0   -3.10    4.80
  20   6   0  216.08   16.80
  20   5   0   -1.40    4.90
  20   4   0  144.09   14.00
  20   3   0   -5.60    5.00
  20   2   0    9.30    5.80
  20   1   0   -6.70    4.90
  20   0   0   34.00    7.70
  20  -1   0    2.80    5.30
  20  -2   0   -1.70    5.60
  20  -3   0    0.20    5.40
  20  -4   0    8.10    6.20
  20  -5   0   -3.40    5.70
  20  -6   0   45.40    9.50
  20  -7   0   -0.20    7.00
  20  -8   0   12.00    7.70
  20  -9   0    4.20    7.60
  20 -10   0   97.09   13.80
  20 -11   0   19.50    8.70
  21   9   0   14.60    6.60
  21   8   0    1.00    5.70
  21   7   0   12.60    6.50
  21   6   0   -2.10    5.30
  21   5   0   -1.30    5.80
  21   4   0   -3.20    5.70
  21   3   0    5.40    6.50
  21   2   0   -2.80    5.70
  21   1   0    7.10    6.30
  21   0   0    0.20    5.60
  21  -1   0    2.90    6.00
  21  -2   0   -1.90    6.10
  21  -3   0   11.90    7.10
  21  -4   0   -3.00    6.00
  21  -5   0   -2.80    6.30
  21  -6   0    0.70    7.10
  21  -7   0   13.50    8.00
  21  -8   0    9.60    8.00
  21  -9   0    1.60    7.50
  22   6   0  132.29   15.00
  22   5   0   -5.40    5.90
  22   4   0   45.40    9.40
  22   3   0    4.20    6.80
  22   2   0   92.39   12.20
  22   1   0   -6.60    5.50
  22   0   0  216.38   18.60
  22  -1   0    5.60    6.90
  22  -2   0   52.79   10.30
  22  -3   0   -6.60    6.90
  22  -4   0   20.50    8.50
  22  -5   0   10.60    7.70
  22  -6   0   71.79   12.30
   0   0   1   -1.80    1.60
   1   0  -1  722.23   35.10
   0  -1  -1  745.73   34.90
   0   1  -1  700.83   35.30
   0  -1  -1  808.32   35.90
   0  -1   1  705.13   35.20
   0   1   1  732.33   34.90
  -1   0   1  692.83   35.10
   1  -1  -1 6362.66  301.37
   1   1  -1 6259.47  300.37
   1  -1  -1 6320.77  302.37
   1   1  -1 6307.67  301.17
  -1   1  -1 6454.65  300.67
  -1  -1  -1 6331.67  301.07
   1  -1   1 6122.49  300.67
  -1  -1   1 6147.98  301.77
  -1   1   1 6467.35  301.37
   1  -2  -1   45.60    4.10
   2   1  -1   55.39    3.50
   1  -2  -1   53.49    3.30
  -2  -1  -1   59.59    4.90
  -1   2   1   49.50    3.30
   2   1   1   49.20    3.20
   0  -2  -1   53.79    4.40
   2   0  -1   48.20    3.40
   2   0  -1   53.79    3.60
   0  -2  -1   45.60    3.00
   0   2   1   42.60    3.10
  -2   0   1   48.60    3.40
   0  -2   1   51.59    3.10
  -1  -2  -1  301.77   14.20
   2  -1  -1  280.07   14.40
  -1  -2  -1  273.67   14.00
  -1  -2  -1  303.07   15.20
   1   2  -1  266.27   13.80
   2  -1  -1  281.87   14.30
  -1  -2   1  277.97   13.70
  -2   1   1  297.87   14.30
   1   2   1  272.57   14.10
   2  -1   1  269.97   14.10
   2   2  -1  278.47   14.50
   2  -2  -1  320.67   14.80
  -2  -2  -1  256.57   15.30
  -2  -2  -1  272.67   14.20
  -2  -2  -1  258.77   14.10
   2  -2  -1  296.77   14.30
  -2   2  -1  271.57   13.80
   2  -2   1  273.07   13.80
  -2   2   1  301.97   14.30
   2   2   1  277.17   14.20
  -2  -2   1  269.47   14.50
  -2   3  -1 1772.22   89.69
  -2   3  -1 1825.42   89.89
   3   2  -1 2005.00   89.89
   3   2  -1 1856.61   90.59
  -3  -2  -1 1917.01   90.29
  -3  -2  -1 1875.61   91.39
   2  -3  -1 1895.11   90.19
   2  -3  -1 1866.61   90.59
  -3  -2   1 1907.11   90.69
   2  -3   1 1856.51   89.89
  -2   3   1 1934.81   90.19
   3   2   1 1896.61   90.29
   2  -3   1 1900.01   89.49
   3   1  -1  733.03   34.90
   1  -3  -1  728.53   35.20
  -3  -1  -1  703.13   34.40
  -1   3  -1  664.63   34.30
   1  -3  -1  737.93   34.50
   3   1   1  717.73   34.60
   1  -3   1  688.83   34.30
  -3  -1   1  709.73   34.90
  -1   3   1  702.23   34.50
   3   1   1  697.63   34.50
   0  -3  -1 1993.60   94.39
   0  -3  -1 1949.80   95.19
   3   0  -1 1987.80   94.49
  -3   0  -1 1973.40   94.19
   3   0  -1 1943.51   94.79
   3   0   1 2077.39   94.49
   3   0   1 1913.61   94.29
  -3   0   1 1944.61   94.69
   0   3   1 2017.60   94.49
   3  -1   1   16.80    2.00
  -2  -3  -1    1.40    2.50
  -3   2  -1    2.50    1.00
  -2  -3  -1    3.50    1.60
  -2  -3  -1    3.10    1.40
   2   3  -1    1.80    1.30
   3  -2   1   -0.10    1.00
   2   3   1    3.10    1.40
  -2  -3   1    3.50    1.30
   3  -3  -1   54.39    4.20
   3   3  -1   42.30    3.40
   3  -3  -1   64.39    4.80
  -3   3   1   57.19    4.10
   4   3  -1   26.30    3.70
   3  -4  -1   33.00    3.40
  -4  -3  -1   27.90    3.40
  -4  -3   1   27.40    3.90
   3  -4   1   25.60    2.90
   4   3   1   27.90    3.30
   3  -4   1   31.30    2.20
   4   3   1   29.60    3.50
  -2   4  -1  383.56   18.10
   2  -4  -1  343.67   18.80
  -4  -2  -1  339.07   18.30
   4   2  -1  367.76   17.90
   4   2  -1  352.16   18.80
   2  -4  -1  346.77   18.20
  -2   4  -1  362.66   17.40
  -4  -2   1  351.16   18.80
   2  -4   1  382.76   18.10
  -2   4   1  353.66   18.20
   2  -4   1  361.46   17.20
   4   2   1  340.97   18.40
   4   2   1  340.37   18.30
  -4  -1  -1    4.40    1.40
   1  -4  -1    5.10    1.40
   4   1  -1    1.40    1.70
  -1   4  -1    2.60    1.50
   1  -4  -1    5.20    2.40
  -4  -1   1    1.80    1.50
  -1   4   1    7.00    1.70
   4   1   1    7.90    1.70
   4   1   1    6.00    1.70
   1  -4   1    2.00    1.70
  -4   0  -1  153.08    8.50
   0  -4  -1  152.98    9.90
   0  -4  -1  158.98    8.70
   0   4   1  150.48    8.90
   4   0   1  157.48    8.80
   0  -4   1  168.28    9.00
   4   0   1  155.68    8.70
  -1  -4  -1  408.76   21.50
   4  -1  -1  421.66   20.50
  -4   1  -1  407.96   20.00
  -1  -4  -1  390.36   20.40
   4  -1  -1  403.26   20.80
   1   4   1  385.46   20.50
   4  -1   1  408.96   20.20
   4  -1   1  405.66   20.10
  -1  -4   1  394.96   20.70
  -4   1   1  409.46   20.70
  -2  -4  -1  442.16   22.60
  -2  -4  -1  432.26   22.70
  -4   2  -1  441.86   22.00
   4  -2  -1  490.35   22.80
  -2  -4  -1  432.76   23.50
   2   4  -1  434.26   22.70
   2   4  -1  458.05   21.50
   4  -2  -1  445.16   22.80
  -4   2   1  459.25   22.60
   4  -2   1  425.06   22.10
  -2  -4   1  448.66   21.60
  -2  -4   1  425.86   22.80
   4  -2   1  447.56   21.90
   3   4  -1  517.85   27.30
  -3  -4  -1  494.05   28.30
  -4   3  -1  574.54   26.70
  -3  -4  -1  565.94   27.40
   4  -3  -1  546.95   27.20
  -3  -4   1  513.95   27.50
  -4   3   1  557.34   27.10
   4  -3   1  523.65   26.70
   3   4   1  582.34   27.40
   4  -3   1  510.25   26.20
  -4  -4  -1    7.80    2.30
  -4   4  -1   11.30    1.90
   4   4  -1   14.90    2.10
   4  -4   1    9.40    1.80
   4   4   1   10.90    2.40
   4   4   1    7.70    2.10
   4  -4   1   10.00    1.50
  -4   5  -1  102.99    6.60
   5   4  -1  100.19    6.10
  -5  -4  -1  101.39    7.20
   4  -5  -1  105.99    6.90
   4  -5  -1  100.19    7.30
   5   4  -1  108.99    7.60
   5   4   1  110.89    7.20
  -5  -4   1  101.69    7.50
   4  -5   1  101.49    5.80
  -4   5   1  106.29    6.90
   5   4   1  101.29    7.20
   4  -5   1  101.19    6.60
  -5  -3  -1 1634.84   78.59
   3  -5  -1 1621.54   78.59
  -3   5  -1 1610.44   77.99
   5   3  -1 1587.24   78.89
   5   3  -1 1640.84   77.59
   3  -5  -1 1639.74   78.19
   3  -5   1 1619.54   77.09
   3  -5   1 1596.74   77.89
  -3   5   1 1638.84   78.19
   5   3   1 1630.54   78.19
   5   3   1 1604.44   78.59
  -5  -3   1 1601.34   78.89
   5   2  -1  101.49    7.40
   2  -5  -1  130.39    7.00
  -5  -2  -1  108.49    7.00
  -2   5  -1  106.49    5.70
  -2   5  -1   95.89    6.70
   5   2  -1  114.39    6.60
  -2   5   1  116.49    6.90
  -5  -2   1  114.39    7.50
   5   2   1  101.09    7.10
   5   2   1  108.09    7.00
   2  -5   1   97.39    6.80
  -1   5  -1 1057.59   53.59
   5   1  -1 1160.68   53.39
   5   1  -1 1127.79   54.29
   1  -5  -1 1149.48   54.39
  -5  -1  -1 1119.09   53.69
   1  -5  -1 1109.19   53.59
   5   1   1 1079.29   53.79
  -1   5   1 1054.59   53.69
   1  -5   1 1080.99   53.49
  -5  -1   1 1084.29   54.19
   5   1   1 1103.19   53.59
   5   0  -1  738.93   35.00
  -5   0  -1  713.83   35.00
   5   0  -1  713.13   35.70
   0  -5   1  703.83   35.30
   5   0   1  700.33   34.90
   5   0   1  708.23   35.20
  -5   0   1  705.03   35.60
  -1  -5  -1 1116.89   55.19
  -5   1  -1 1151.88   54.79
   5  -1  -1 1137.09   55.09
  -1  -5  -1 1157.68   56.09
   5  -1  -1 1160.08   55.69
   1   5   1 1095.79   55.29
   5  -1   1 1122.09   54.79
   5  -1   1 1132.79   55.09
  -5   1   1 1153.28   55.49
  -1  -5   1 1112.69   55.39
  -2  -5  -1    4.00    3.00
  -2  -5  -1    4.90    2.00
   5  -2  -1    2.70    2.10
  -5   2  -1    0.80    1.30
  -2  -5  -1    3.90    2.10
   5  -2   1    3.20    1.40
   5  -2   1    3.30    1.40
   3   5  -1   51.59    3.30
   5  -3  -1   57.69    5.30
   3   5  -1   46.80    4.90
   5  -3  -1   46.60    4.60
  -3  -5   1   61.89    5.20
  -5   3   1   51.49    4.60
   5  -3   1   58.79    3.70
   5  -4  -1  527.65   25.70
   5  -4  -1  506.15   25.70
   4   5  -1  501.35   24.30
  -4  -5  -1  479.45   25.80
   4   5  -1  476.55   25.80
  -5   4  -1  503.95   25.00
  -4  -5   1  508.95   26.30
   5  -4   1  492.55   24.40
  -5   4   1  508.25   25.50
   5  -4   1  484.65   25.10
   4   5   1  488.15   25.80
   5  -5  -1   -1.70    1.60
   5  -5  -1   -1.80    2.10
   5   5  -1   -0.20    1.20
  -5   5  -1    1.20    1.30
  -5  -5  -1   -0.60    1.80
   5   5  -1    5.10    2.40
   5  -5   1    3.40    1.50
   5   5   1   -1.40    1.80
  -5   5   1   -0.80    1.30
  -5  -5   1    1.70    1.90
   5  -5   1   -0.80    1.10
   5   5   1    0.40    1.60
   5  -6  -1  130.79    8.60
  -6  -5  -1  107.09    8.20
  -5   6  -1  114.89    7.50
   6   5  -1  106.19    8.40
   6   5  -1  118.19    6.80
   5  -6  -1  109.09    7.80
  -6  -5   1  112.49    8.60
   5  -6   1  105.29    7.40
   5  -6   1  115.29    6.70
  -5   6   1  110.09    7.80
   6   5   1  111.49    8.10
   6   5   1  110.59    7.60
   4  -6  -1  348.07   19.00
  -4   6  -1  342.37   18.80
   4  -6  -1  359.76   19.50
  -6  -4  -1  349.87   19.50
   6   4  -1  362.36   20.00
   6   4   1  356.86   19.60
   6   4   1  365.86   19.00
   4  -6   1  366.46   18.00
   4  -6   1  353.56   18.80
  -4   6   1  364.56   19.10
  -6  -4   1  374.16   20.00
   3  -6  -1    1.10    1.60
  -6  -3  -1    0.10    1.60
   6   3  -1   -0.20    1.80
  -3   6  -1    2.50    1.60
   6   3  -1    0.30    1.50
  -3   6   1    0.00    1.50
   3  -6   1    1.30    1.10
   6   3   1    0.40    1.70
  -6  -3   1    0.00    1.80
   3  -6   1    2.80    1.60
   6   3   1    1.20    1.80
  -6  -2  -1   33.80    3.80
   2  -6  -1   20.40    3.90
   2  -6  -1   31.30    3.60
  -2   6  -1   29.00    3.70
   6   2  -1   39.70    4.30
  -6  -2   1   43.30    4.40
  -6  -1  -1   18.50    2.80
   6   1  -1   25.70    3.20
   1  -6  -1   19.70    3.70
   6   1  -1   21.00    3.40
   1  -6  -1   24.60    3.30
  -1   6  -1   17.50    2.80
  -1   6   1   26.70    3.50
   1  -6   1   18.20    3.00
  -6  -1   1   17.80    3.00
   6   1   1   20.00    2.90
   6   1   1   21.20    3.20
  -6   1  -1  194.38   10.80
   6  -1  -1  183.48   11.50
  -1  -6  -1  187.98   12.30
   6  -1  -1  197.58   11.00
  -1  -6  -1  190.68   11.20
   6  -1   1  208.28   11.30
  -6   1   1  195.38   11.40
   6  -1   1  218.18   10.80
   1   6   1  180.18   11.40
  -1  -6   1  181.48   11.40
  -6   2  -1   -0.20    1.10
  -2  -6  -1    0.50    1.80
  -2  -6  -1   -1.60    2.50
   6  -2  -1    0.30    1.60
  -2  -6  -1   -0.60    1.50
   6  -2  -1   -1.30    1.40
   6  -2   1    0.10    1.40
   6  -2   1   -0.80    1.10
  -6   2   1   -1.10    1.30
  -2  -6   1   -0.10    2.30
   3   6  -1   98.99    5.60
  -3  -6  -1   94.49    7.20
   3   6  -1   93.89    7.10
   6  -3  -1  104.69    7.10
  -3  -6  -1  101.59    7.80
  -3  -6  -1  110.19    8.80
  -6   3  -1  100.49    6.50
   6  -3  -1  106.89    7.40
  -3  -6   1  103.79    7.70
  -6   3   1  100.09    7.10
   6  -3   1  104.39    6.10
   6  -3   1  103.69    6.80
  -6   4  -1   75.09    5.50
  -4  -6  -1   98.59    7.20
  -4  -6  -1   94.09    6.80
   4   6  -1   82.19    4.90
  -4  -6  -1   87.19    8.90
   4   6  -1   73.19    6.40
   6  -4  -1   67.09    6.20
   4   6   1   92.99    6.50
  -6   4   1   69.79    6.00
   6  -4   1   79.39    5.00
   6  -4   1   70.19    5.70
  -4  -6   1   78.39    6.60
  -5  -6  -1  345.07   19.00
   5   6  -1  354.66   17.10
   6  -5  -1  323.47   18.50
   5   6  -1  322.67   18.80
   6  -5  -1  331.17   18.50
  -6   5  -1  333.57   17.80
   6  -5   1  330.87   18.00
   5   6   1  348.57   18.90
  -5  -6   1  354.66   19.40
   6  -5   1  327.27   17.20
  -6   5   1  344.47   18.40
   5   6   1  336.37   18.20
   6   6  -1   96.49    6.10
  -6   6  -1   93.59    7.00
   6  -6  -1   97.99    7.60
   6   6  -1   96.79    7.90
  -6   6   1  100.29    7.30
  -6  -6   1   96.69    8.40
   6  -6   1   92.99    7.00
   6   6   1  113.09    7.90
   6   6   1  101.19    7.40
   6  -6   1   99.39    6.40
   6  -7  -1  189.98   12.20
  -6   7  -1  185.48   11.30
   7   6  -1  184.58   10.40
   7   6  -1  185.18   12.30
  -7  -6  -1  183.28   12.20
   6  -7  -1  187.08   11.60
   7   6   1  175.48   11.40
   6  -7   1  186.08   10.60
   7   6   1  177.68   12.00
  -7  -6   1  182.08   12.50
   6  -7   1  186.88   11.30
  -6   7   1  180.18   11.40
   7   5  -1    8.20    3.00
   5  -7  -1   -0.50    3.10
   5  -7  -1    0.80    2.10
  -5   7  -1    3.00    2.20
   7   5  -1    5.10    1.80
  -7  -5  -1    5.50    2.50
   5  -7   1    6.60    2.10
  -5   7   1    1.90    2.20
   7   5   1    4.20    2.40
  -7  -5   1    2.70    2.50
   7   5   1    4.60    2.50
   5  -7   1    2.60    2.10
  -7  -4  -1  311.47   18.00
   7   4  -1  330.17   16.70
  -4   7  -1  306.27   17.40
   7   4  -1  314.57   18.40
   4  -7  -1  372.76   18.60
   4  -7  -1  313.97   17.50
   4  -7   1  314.97   17.30
   4  -7   1  332.77   16.50
  -7  -4   1  310.17   18.40
  -4   7   1  297.37   17.40
   7   4   1  316.27   17.30
   7   4   1  324.37   18.10
   3  -7  -1   10.00    3.20
  -7  -3  -1   11.70    2.60
   7   3  -1   13.60    2.30
   7   3  -1   10.50    2.90
  -3   7  -1   11.60    2.70
   3  -7  -1   10.30    2.40
  -3   7   1   11.60    2.80
   7   3   1   12.40    2.60
   3  -7   1    6.60    1.90
   7   3   1   12.60    2.80
   3  -7   1   10.40    2.50
  -7  -3   1   12.10    3.10
  -2   7  -1 1572.04   77.79
   7   2  -1 1580.44   78.49
  -7  -2  -1 1591.64   77.99
   2  -7  -1 1567.34   77.59
   7   2  -1 1655.33   77.09
   2  -7  -1 1659.33   78.39
   7   2   1 1573.54   77.39
   2  -7   1 1609.04   77.59
  -7  -2   1 1603.74   78.49
  -2   7   1 1594.64   77.89
   7   2   1 1584.04   78.09
  -7  -1  -1   -0.30    1.60
  -1   7  -1    0.00    1.60
   7   1  -1    2.20    1.70
   7   1  -1    6.70    2.40
   1  -7  -1    0.60    1.50
   1  -7  -1   -0.40    2.70
  -1   7   1    2.70    1.90
   7   1   1   -1.20    1.60
  -7  -1   1    4.20    1.90
   7   1   1   -0.30    1.50
   1  -7   1   -1.90    1.80
   7   0  -1   10.00    2.80
   7   0  -1   10.60    2.40
   0  -7  -1   13.60    2.50
  -7   0  -1   11.90    2.40
   0  -7  -1   13.50    3.70
  -7   0   1    9.50    2.70
   0   7   1   11.00    2.60
   7   0   1   10.10    2.60
   7   0   1    9.00    2.10
   7  -1  -1  179.78   10.40
  -1  -7  -1  180.38   10.70
  -7   1  -1  179.58   10.40
  -1  -7  -1  159.58   11.70
   7  -1  -1  175.88   11.10
  -1  -7   1  163.18   10.90
  -1  -7   1  168.98   11.00
   1   7   1  180.98   11.10
  -7   1   1  175.28   10.90
   7  -1   1  180.28   10.70
   7  -1   1  183.38   10.00
   3   7  -1  172.88    8.50
   7  -3  -1  161.68   10.50
   7  -3  -1  151.78   10.00
  -3  -7  -1  147.79   11.70
  -7   3  -1  165.78    9.50
  -3  -7  -1  155.68   10.50
  -3  -7  -1  162.38   11.00
   7  -3   1  154.28    9.90
  -7   3   1  163.78   10.10
  -3  -7   1  149.59   10.80
   7  -3   1  176.78    9.20
   4   7  -1  278.17   14.10
   7  -4  -1  262.37   15.90
   7  -4  -1  282.77   15.80
  -4  -7  -1  303.07   16.60
  -7   4  -1  267.37   15.10
  -4  -7  -1  320.47   16.30
   4   7  -1  261.17   16.10
  -7   4   1  273.07   15.60
  -4  -7   1  266.37   16.30
   7  -4   1  263.47   15.50
   7  -4   1  275.47   14.50
   5   7  -1 1210.38   60.29
  -5  -7  -1 1192.38   60.29
  -7   5  -1 1223.48   59.19
   7  -5  -1 1216.68   59.69
   7  -5  -1 1235.48   60.09
   5   7  -1 1206.48   58.19
  -7   5   1 1233.18   59.69
   5   7   1 1174.88   59.99
   7  -5   1 1211.38   58.49
   7  -5   1 1207.58   59.49
  -5  -7   1 1202.18   60.69
   5   7   1 1181.08   59.29
  -7   6  -1    5.90    2.20
   6   7  -1    6.50    2.60
   7  -6  -1    0.00    2.10
  -6  -7  -1    2.00    2.80
   7  -6  -1    6.40    3.00
   6   7  -1    9.90    2.00
  -6  -7   1    7.70    3.00
   7  -6   1   -0.20    2.10
   6   7   1    0.80    2.40
   6   7   1    4.10    2.80
   7  -6   1    3.40    2.00
  -7  -7  -1  103.59    8.70
   7  -7  -1   98.79    9.00
  -7   7  -1   88.89    7.30
   7   7  -1   97.79    6.60
   7  -7  -1   99.49    8.20
   7   7  -1   95.09    8.40
   7   7   1   97.49    8.10
   7  -7   1  100.69    7.60
  -7   7   1   97.99    7.80
  -7  -7   1   97.89    9.00
   7   7   1   93.59    7.80
   7  -7   1   91.39    7.00
   7  -8  -1  105.29    9.30
   7  -8  -1   79.49    7.60
   8   7  -1   81.79    6.20
  -8  -7  -1   78.49    7.90
  -7   8  -1   77.09    7.10
   8   7  -1   87.19    8.20
   8   7   1   79.19    7.70
   8   7   1   79.09    7.40
   7  -8   1   78.19    6.90
   7  -8   1   80.19    7.10
  -8  -7   1   74.59    8.20
  -7   8   1   75.99    7.20
  -8  -6  -1   21.70    4.20
   8   6  -1   15.50    2.90
  -6   8  -1   17.70    3.50
   8   6  -1   12.70    3.90
   6  -8  -1   22.90    4.20
  -6   8   1   16.10    3.50
   6  -8   1   15.80    3.30
   8   6   1   16.20    3.70
   8   6   1   21.90    4.50
   6  -8   1   21.80    3.60
  -8  -6   1   15.20    4.10
   8   5  -1   45.90    6.10
  -5   8  -1   43.80    5.30
  -8  -5  -1   51.19    6.00
   5  -8  -1   43.10    5.40
   5  -8  -1   57.79    7.10
   8   5  -1   52.59    4.90
   5  -8   1   38.50    5.20
  -8  -5   1   63.49    6.80
   5  -8   1   49.60    5.30
   8   5   1   61.59    5.70
   8   5   1   63.59    6.40
  -5   8   1   43.60    5.40
   8   4  -1  111.99    8.90
  -4   8  -1  106.19    8.10
  -8  -4  -1  119.79    8.70
   4  -8  -1  104.39    8.00
   4  -8  -1   96.19    9.10
   8   4  -1  127.29    7.50
   8   4   1  120.39    8.20
   4  -8   1  112.79    7.30
  -8  -4   1  115.19    9.00
   4  -8   1  110.09    7.90
  -4   8   1  101.79    8.20
   8   4   1  114.69    8.70
   3  -8  -1    5.30    3.70
   3  -8  -1    9.30    2.70
  -8  -3  -1   11.30    3.00
   8   3  -1   12.80    2.80
   8   3  -1   11.90    3.10
   8   3   1   11.00    3.00
  -3   8   1   11.20    2.90
   8   3   1   11.30    2.80
  -8  -3   1   16.10    3.50
   2  -8  -1    2.30    1.70
  -2   8  -1    2.60    2.20
  -8  -2  -1    3.80    2.00
   2  -8  -1   -3.50    3.00
   8   2  -1    0.90    2.20
   8   2   1    2.70    2.00
   2  -8   1    3.20    2.10
   8   2   1   -1.00    2.20
  -2   8   1    3.00    2.00
  -8  -2   1   -0.70    1.90
   1  -8  -1   16.70    3.00
   8   1  -1   12.30    3.30
   8   1  -1   17.00    3.00
   1  -8  -1   18.00    4.30
  -8  -1  -1   15.50    3.00
  -8  -1   1   15.90    3.40
   8   1   1   20.10    3.10
   1  -8   1   12.10    3.10
   8   1   1   16.10    3.30
  -1   8   1   14.90    3.20
   8   0  -1  224.58   12.40
   8   0  -1  218.98   13.60
   0  -8  -1  230.78   12.90
  -8   0  -1  210.78   12.60
   0  -8  -1  201.68   14.00
   8   0   1  204.68   12.90
   0   8   1  230.08   13.40
   0  -8   1  200.78   12.90
   8   0   1  215.78   12.20
  -8   0   1  221.78   13.30
  -1  -8  -1   95.59    9.50
  -1  -8  -1  121.09    8.30
   8  -1  -1  103.19    7.70
   8  -1  -1  106.59    8.40
  -8   1  -1  118.49    7.80
  -8   1   1  108.39    8.10
  -1  -8   1  113.69    8.80
   8  -1   1  120.79    7.30
  -1  -8   1  125.49    8.90
   8  -1   1  115.59    8.10
   1   8   1  106.49    8.60
  -2  -8  -1    5.70    3.70
  -2  -8  -1    4.40    2.40
  -8   2  -1    1.00    1.80
  -2  -8  -1    6.40    2.80
   8  -2  -1    0.90    2.20
   8  -2  -1    2.10    2.10
   8  -2   1    4.60    2.30
  -2  -8   1    4.70    3.20
   8  -2   1    3.80    1.70
  -8   2   1    2.70    2.10
  -2  -8   1    3.20    2.70
   8  -3  -1   19.80    4.10
  -3  -8  -1   35.70    5.90
   8  -3  -1   21.50    3.80
  -3  -8  -1   24.80    4.30
  -8   3  -1   23.50    3.40
   3   8  -1   23.70    2.70
  -3  -8  -1   31.20    4.70
   8  -3   1   24.40    3.90
  -8   3   1   20.40    3.60
   8  -3   1   24.60    3.30
  -3  -8   1   31.10    5.20
   5   8  -1   40.60    5.60
   8  -5  -1   53.79    6.20
  -5  -8  -1   40.80    6.00
   5   8  -1   39.60    3.90
   8  -5  -1   42.40    5.70
  -8   5  -1   36.60    4.50
  -5  -8  -1   32.30    5.30
  -5  -8   1   44.50    6.00
   8  -5   1   33.70    4.10
  -8   5   1   34.10    4.90
   8  -5   1   43.40    5.40
   5   8   1   36.90    5.20
   8  -6  -1   10.60    3.90
   6   8  -1   18.40    3.00
  -8   6  -1    5.60    2.50
   6   8  -1    8.10    3.30
   8  -6  -1    5.20    3.00
   8  -6   1    4.40    2.80
  -6  -8   1   11.60    4.30
  -8   6   1    7.90    2.80
   8  -6   1    7.90    2.60
   8  -7  -1  264.37   16.70
  -7  -8  -1  286.07   17.70
   8  -7  -1  271.57   17.10
   7   8  -1  257.97   17.00
   7   8  -1  290.87   15.00
  -8   7  -1  263.97   15.90
  -7  -8   1  284.77   17.90
   7   8   1  299.97   16.40
   7   8   1  276.67   17.10
   8  -7   1  274.97   16.30
   8  -7   1  276.87   15.40
  -8   7   1  286.27   16.50
   8  -8  -1    7.10    3.50
   8   8  -1    2.00    2.60
   8   8  -1    6.20    3.40
  -8  -8  -1    2.70    3.40
  -8   8  -1    0.80    2.90
   8   8   1    4.10    3.20
   8  -8   1    1.60    3.00
  -8  -8   1   -0.20    3.50
   8  -9  -1   30.30    5.30
  -8   9  -1   24.90    4.40
   9   8  -1   17.60    4.80
  -9  -8  -1   21.90    4.90
   8  -9  -1   24.20    5.90
   8  -9   1   22.00    4.50
  -8   9   1   27.50    4.80
   8  -9   1   22.80    4.60
  -9  -8   1   24.50    5.70
   9   8   1   23.20    4.80
   9   8   1   24.20    5.00
   9   7  -1 1427.16   70.29
   9   7  -1 1423.76   72.89
   7  -9  -1 1461.15   71.89
   7  -9  -1 1464.55   72.29
  -7   9  -1 1405.06   71.49
  -9  -7  -1 1462.95   72.79
   9   7   1 1414.26   72.49
   7  -9   1 1504.85   70.69
  -7   9   1 1452.15   71.79
   7  -9   1 1470.15   71.49
   9   7   1 1374.86   70.99
  -9  -7   1 1488.15   73.19
   9   6  -1    6.50    3.50
   9   6  -1    4.90    2.60
   6  -9  -1    6.70    2.90
  -6   9  -1    7.90    2.80
  -9  -6  -1    3.50    3.00
  -9  -6   1    6.10    3.70
   9   6   1    3.00    3.10
  -6   9   1    5.20    2.90
   9   6   1    2.20    3.20
   6  -9   1    6.40    2.90
   6  -9   1    0.10    3.00
   9   5  -1   44.00    4.90
   5  -9  -1   49.10    6.80
   9   5  -1   46.70    6.60
  -5   9  -1   44.30    5.40
   5  -9  -1   43.80    5.60
  -9  -5  -1   45.80    5.90
  -5   9   1   46.90    5.90
   5  -9   1   48.40    5.40
   5  -9   1   44.00    5.30
   9   5   1   41.70    5.80
   9   5   1   51.69    6.30
  -9  -5   1   38.90    5.90
  -4   9  -1  146.09   10.70
  -9  -4  -1  174.38   11.30
   9   4  -1  148.59   11.50
   9   4  -1  157.78    9.80
   9   4   1  169.48   11.40
   4  -9   1  149.69   10.30
  -9  -4   1  156.88   11.60
   4  -9   1  161.98    9.60
   9   4   1  149.39   10.40
   9   3  -1 1748.13   86.09
   3  -9  -1 1776.12   85.59
   3  -9  -1 1752.82   84.89
  -9  -3  -1 1735.43   85.39
   9   3  -1 1750.72   83.99
  -3   9  -1 1732.73   85.09
   3  -9   1 1689.13   83.49
   9   3   1 1739.33   85.59
  -9  -3   1 1761.02   85.99
   3  -9   1 1720.33   84.69
   9   3   1 1728.23   84.39
  -3   9   1 1725.33   85.19
   9   2  -1  386.46   20.00
   2  -9  -1  369.46   21.50
  -2   9  -1  370.16   20.90
   2  -9  -1  376.86   20.60
  -9  -2  -1  380.66   21.00
   9   2  -1  366.66   21.70
  -2   9   1  360.46   20.90
   9   2   1  368.46   21.20
   2  -9   1  393.66   20.90
  -9  -2   1  396.06   21.70
   9   2   1  384.36   20.20
   9   1  -1  695.53   34.70
   1  -9  -1  676.23   36.10
   9   1  -1  679.43   36.20
  -9  -1  -1  701.23   35.50
   1  -9  -1  689.93   35.30
   9   1   1  679.03   35.70
  -9  -1   1  683.43   36.00
   9   1   1  670.13   34.60
   1  -9   1  722.53   35.40
  -1   9   1  697.93   35.80
   9   0  -1   25.20    3.70
  -9   0  -1   20.40    3.60
   9   0  -1   36.60    5.70
   9   0   1   28.30    4.50
  -9   0   1   22.60    4.20
   0  -9   1   28.00    4.60
   9   0   1   25.70    3.50
   9  -1  -1   94.29    8.20
  -9   1  -1   92.89    7.30
  -1  -9  -1  112.79    8.20
   9  -1  -1   84.99    7.20
  -1  -9  -1  115.79   10.00
  -9   1   1   89.99    7.80
   1   9   1  110.29    8.70
  -1  -9   1  121.39    9.10
   9  -1   1   84.19    6.80
   9  -1   1   95.59    7.80
   9  -2  -1  381.76   23.10
  -9   2  -1  395.76   22.10
   9  -2  -1  389.16   22.10
   9  -2   1  411.16   21.60
   9  -2   1  403.56   22.80
  -2  -9   1  415.56   23.70
  -9   2   1  437.46   23.10
  -2  -9   1  517.25   23.80
   9  -3  -1   -1.30    2.80
  -9   3  -1   10.20    2.60
   9  -3  -1    8.20    3.30
   9  -3   1    4.80    2.40
  -9   3   1    6.60    2.60
  -3  -9   1    4.90    4.00
   9  -3   1    5.40    3.00
  -3  -9   1    9.80    5.30
   9  -4  -1  149.09   10.80
   9  -4  -1  156.98   11.40
  -9   4  -1  158.68   10.20
   4   9  -1  162.28    8.90
   9  -4   1  182.38    9.80
  -4  -9   1  129.69   12.60
  -9   4   1  172.48   10.90
   9  -4   1  156.68   10.80
  -5  -9  -1   91.89    9.30
   9  -5  -1   78.09    8.20
  -5  -9  -1   88.89    8.70
  -9   5  -1   91.79    7.00
   9  -5  -1   84.39    8.10
  -5  -9   1   99.29    9.00
   9  -5   1   84.69    6.60
   9  -5   1   93.49    7.70
   5   9   1   91.69    7.80
  -9   5   1   96.49    7.70
  -6  -9  -1   27.90    6.50
  -9   6  -1   32.20    4.60
   6   9  -1   26.90    5.20
   9  -6  -1   25.90    5.70
   9  -6  -1   26.30    4.80
   6   9  -1   45.70    4.60
  -6  -9  -1   37.60    6.40
  -6  -9   1   48.40    7.10
   9  -6   1   46.30    5.30
  -9   6   1   30.90    5.00
   6   9   1   34.40    5.50
   9  -6   1   25.60    4.70
   6   9   1   29.80    5.30
  -9   7  -1    1.60    2.50
   7   9  -1    7.30    2.20
   7   9  -1   -2.90    3.10
   9  -7  -1   -4.30    3.90
   9  -7  -1   -3.70    3.10
  -7  -9   1    6.30    4.00
   7   9   1   13.90    3.50
   9  -7   1   -1.10    3.00
  -9   7   1   -3.00    2.60
   9  -7   1    5.40    2.70
   7   9   1    1.90    3.20
   8   9  -1   58.19    6.00
  -9   8  -1   62.89    6.60
   9  -8  -1   59.19    8.20
   9  -8  -1   67.99    7.90
  -8  -9  -1   84.69    9.60
   8   9  -1   69.39    8.80
   9  -8   1   66.69    7.40
   8   9   1   68.69    8.40
  -9   8   1   66.89    7.20
   8   9   1   63.19    7.90
  -8  -9   1   74.39    9.80
   9  -9  -1  451.35   26.00
   9   9  -1  463.45   23.30
  -9  -9  -1  452.75   26.20
   9   9  -1  403.46   25.60
  -9   9  -1  448.06   24.70
   9  -9  -1  449.66   25.50
  -9  -9   1  427.16   26.50
   9  -9   1  468.45   24.30
  -9   9   1  434.06   24.90
   9  -9   1  462.05   25.10
   9   9   1  442.16   24.50
   9   9   1  433.46   25.90
   9 -10  -1   23.70    6.90
  10   9  -1   34.00    6.20
  10   9  -1   36.60    5.00
   9 -10  -1   50.09    6.70
   9 -10   1   21.40    5.50
 -10  -9   1   48.30    7.50
  10   9   1   41.50    6.40
  -9  10   1   41.40    6.10
  10   8  -1   15.00    4.80
  -8  10  -1   16.60    4.40
  10   8  -1   15.50    3.50
 -10  -8  -1   15.20    4.80
   8 -10  -1   17.90    4.60
   8 -10  -1   19.10    5.80
  10   8   1   19.40    5.00
  -8  10   1   20.70    4.90
  10   8   1   23.90    4.50
   8 -10   1   14.40    4.10
   8 -10   1   15.50    4.20
 -10  -8   1   15.70    5.10
  -7  10  -1   33.50    5.20
 -10  -7  -1   33.70    6.00
  10   7  -1   32.40    4.40
   7 -10  -1   29.90    5.10
   7 -10  -1   33.40    6.50
  10   7  -1   36.50    6.70
   7 -10   1   37.00    5.00
  -7  10   1   36.40    5.80
   7 -10   1   26.90    4.80
 -10  -7   1   30.20    5.80
  10   7   1   35.80    6.10
   6 -10  -1   30.30    5.00
 -10  -6  -1   21.20    4.80
   6 -10  -1   31.30    6.10
  -6  10  -1   23.40    4.40
  10   6  -1   21.80    5.20
  10   6   1   31.80    4.90
  -6  10   1   48.00    6.40
  10   6   1   24.40    5.10
 -10  -6   1   31.30    6.10
   6 -10   1   25.90    4.50
   6 -10   1   24.70    4.40
  10   5  -1  375.16   22.70
  -5  10  -1  365.46   21.40
   5 -10  -1  359.46   22.50
  10   5  -1  368.36   20.20
 -10  -5  -1  384.96   22.20
   5 -10  -1  382.16   21.40
  10   5   1  438.56   21.40
 -10  -5   1  365.86   22.60
  10   5   1  373.86   22.30
   5 -10   1  361.56   20.40
   5 -10   1  377.96   21.10
  -5  10   1  388.76   21.80
   4 -10  -1   11.40    4.90
  10   4  -1   16.20    4.40
  10   4  -1   17.80    3.30
   4 -10  -1    9.30    3.30
 -10  -4  -1   13.90    3.90
  -4  10  -1   15.00    3.90
  10   4   1   10.50    3.90
   4 -10   1   10.10    3.30
  -4  10   1    9.50    3.80
 -10  -4   1   22.30    5.20
  10   4   1   10.80    3.20
   3 -10  -1   25.90    5.50
  10   3  -1   15.60    4.40
  -3  10  -1   22.50    4.30
   3 -10  -1   20.90    3.80
  10   3  -1   22.60    3.60
 -10  -3  -1   23.80    4.40
  10   3   1   20.50    4.20
   3 -10   1   23.50    3.90
  10   3   1   17.80    3.60
 -10  -3   1   21.00    4.70
  -3  10   1   27.90    4.90
   2 -10  -1   -3.20    3.50
   2 -10  -1    0.00    2.10
  10   2  -1   -0.50    2.90
 -10  -2  -1   -0.90    2.00
  -2  10  -1    0.20    2.20
 -10  -2   1    1.70    2.60
  10   2   1   -0.80    2.50
  -2  10   1   -0.60    2.80
   2 -10   1    1.00    2.90
  10   2   1   -3.40    2.10
   1 -10  -1  266.37   15.80
  10   1  -1  278.77   17.00
 -10  -1  -1  266.87   15.90
  10   1  -1  260.77   15.10
   1 -10  -1  270.57   17.10
  10   1   1  257.67   15.10
   1 -10   1  266.77   15.90
  10   1   1  263.87   16.30
 -10  -1   1  277.27   16.70
  -1  10   1  274.67   16.60
 -10   0  -1    0.00    2.20
  10   0  -1    8.30    3.20
  10   0  -1   -2.20    2.40
   0 -10  -1   14.00    4.90
 -10   0   1    0.70    2.40
   0 -10   1   -1.60    2.40
  10   0   1    0.60    2.10
  10   0   1   -2.50    2.40
  -1 -10  -1  153.98   11.40
  10  -1  -1  143.59    9.70
  -1 -10  -1  119.99   12.10
 -10   1  -1  147.79    9.80
  10  -1  -1  150.98   11.00
  -1 -10  -1  140.89   10.50
  10  -1   1  141.49    9.00
  -1 -10   1  130.49   11.20
 -10   1   1  147.19   10.50
  10  -1   1  134.79   10.30
  -1 -10   1  139.39   10.80
 -10   2  -1   20.70    3.50
  -2 -10  -1   24.60    5.10
  10  -2  -1   20.60    4.00
  -2 -10  -1   26.50    6.20
  10  -2  -1   12.80    3.80
 -10   2   1   13.10    3.50
  -2 -10   1   23.20    5.60
  -2 -10   1   18.00    5.00
  10  -2   1   22.50    3.40
  10  -2   1   22.70    4.30
 -10   3  -1   28.80    4.10
  -3 -10  -1   42.60    6.80
  -3 -10  -1   34.00    5.70
  10  -3  -1   22.70    5.20
  10  -3  -1   25.10    4.50
  -3 -10  -1   27.10    7.00
  10  -3   1   28.30    4.80
  -3 -10   1   42.10    6.10
 -10   3   1   33.00    5.10
  10  -3   1   27.40    3.70
  -4 -10  -1   87.89   10.80
  -4 -10  -1   72.39    9.20
  10  -4  -1   77.29    7.70
 -10   4  -1   69.89    6.50
  10  -4  -1   74.39    8.10
   4  10  -1   76.39    5.50
  -4 -10  -1   80.29    9.70
  -4 -10   1   76.29   10.00
  10  -4   1   79.79    7.80
  10  -4   1   72.49    6.30
  -4 -10   1   92.79    9.70
 -10   4   1   58.29    6.90
   5  10  -1  164.48    9.60
  10  -5   1  193.48   10.80
  -5 -10   1  129.19   12.80
  10  -6  -1   14.80    4.40
 -10   6  -1   12.20    3.40
  -6 -10  -1   15.80    5.50
  10  -6   1   16.50    3.60
   6  10   1   10.40    4.60
  -6 -10   1   22.00    5.00
  10  -6   1   14.80    4.20
  10  -7  -1   24.60    5.30
  10  -7  -1   24.70    5.70
  -7 -10  -1   22.30    6.30
   7  10  -1   22.40    4.90
 -10   7  -1   23.00    4.20
   7  10   1   28.50    5.20
 -10   7   1   27.30    5.00
  10  -7   1   30.70    4.50
  -7 -10   1   32.20    6.60
  10  -7   1   29.50    5.30
  10  -9  -1   12.50    4.40
   9  10  -1   14.10    3.30
  10  -9  -1   17.80    5.60
  -9 -10  -1   17.20    5.60
  -9 -10   1   15.30    5.60
  10  -9   1   23.50    4.50
   9  10   1   19.70    5.10
 -10   9   1   15.70    4.10
   9  10   1   18.40    5.70
  10 -10  -1    5.40    4.90
  10  10  -1    6.90    3.10
  10  10   1    7.00    4.00
  10 -10   1    4.00    3.70
 -10 -10   1    5.00    4.20
 -10  10   1   12.00    3.60
  11  10  -1   52.99    6.30
  10 -11  -1   50.39    8.60
  10 -11   1   57.79    7.90
 -11 -10   1   58.29    8.80
  11  10   1   62.59    8.10
   9 -11  -1   91.19   11.40
   9 -11  -1  102.69   10.90
  11   9  -1  104.89    8.10
  11   9   1   96.99    9.50
  -9  11   1   87.89    9.20
 -11  -9   1   99.09   10.60
   9 -11   1  100.99    9.20
  11   8  -1   85.49    7.50
  11   8  -1   85.19    9.50
   8 -11  -1   81.49   11.20
   8 -11  -1   91.89    8.80
   8 -11   1  101.79    8.80
  11   8   1   81.69    8.70
  -8  11   1   84.19    8.80
 -11  -8   1   91.29   10.00
  11   7  -1  265.07   15.80
   7 -11  -1  258.37   18.80
  11   7  -1  279.07   18.60
 -11  -7  -1  276.67   18.30
   7 -11  -1  281.97   17.40
 -11  -7   1  281.87   18.60
   7 -11   1  276.37   17.20
   7 -11   1  298.37   16.90
  -7  11   1  282.87   17.60
  11   7   1  282.77   18.30
  11   7   1  271.87   16.90
  11   6  -1   13.70    4.50
  11   6  -1   14.40    3.50
   6 -11  -1   10.10    5.10
   6 -11  -1    8.30    3.40
  -6  11  -1   11.30    3.80
 -11  -6  -1   11.80    4.20
   6 -11   1   10.30    3.60
   6 -11   1   12.80    4.00
 -11  -6   1   11.60    4.60
  11   6   1   10.20    4.20
  -6  11   1   11.50    4.20
  11   6   1    9.30    3.80
 -11  -5  -1   -2.80    2.80
   5 -11  -1    2.30    4.70
   5 -11  -1    0.10    2.90
  11   5  -1   -2.20    3.40
  11   5  -1    1.00    2.80
  -5  11  -1   -4.10    2.80
 -11  -5   1   -3.00    3.40
  11   5   1    1.60    2.80
   5 -11   1    0.30    3.10
   5 -11   1   -3.10    2.50
  11   5   1    1.90    3.40
  -5  11   1   -1.30    2.80
 -11  -4  -1   35.30    5.70
  -4  11  -1   37.60    5.80
  11   4  -1   32.80    6.50
   4 -11  -1   33.80    5.20
   4 -11  -1   34.80    6.60
  11   4   1   32.30    4.80
   4 -11   1   51.89    5.90
 -11  -4   1   28.00    6.20
  11   4   1   30.70    5.70
   4 -11   1   33.50    5.10
  -4  11   1   51.99    7.10
   3 -11  -1 1420.26   71.49
  11   3  -1 1409.36   72.09
 -11  -3  -1 1377.56   71.19
   3 -11  -1 1427.66   70.69
  11   3  -1 1452.45   69.79
  -3  11  -1 1416.36   71.09
 -11  -3   1 1463.95   72.09
  -3  11   1 1360.76   71.09
  11   3   1 1499.15   70.09
   3 -11   1 1413.16   70.59
  11   3   1 1427.56   71.69
 -11  -2  -1   13.40    4.00
  11   2  -1   19.70    3.80
  11   2  -1   12.20    4.40
  -2  11  -1   15.60    4.10
   2 -11  -1   11.10    4.00
  11   2   1   16.70    4.40
   2 -11   1    8.70    4.20
 -11  -2   1    7.60    4.10
  -2  11   1   10.80    4.20
  11   1  -1  723.93   37.80
   1 -11  -1  718.63   39.40
  11   1  -1  741.03   39.70
   1 -11  -1  679.03   38.20
 -11  -1  -1  741.43   38.70
  11   1   1  736.23   39.20
 -11  -1   1  786.12   39.70
   1 -11   1  790.22   38.80
  11   1   1  757.52   37.70
  -1  11   1  763.02   39.50
  11   0  -1   88.79    8.30
  11   0  -1  109.89    9.90
 -11   0  -1   92.39    8.20
   0 -11  -1  122.59   11.80
  11   0   1   99.39    7.80
 -11   0   1   98.79    9.10
   0 -11   1   92.29    9.70
   0 -11   1   93.39    9.60
  11   0   1  101.29    9.20
  11  -1  -1  318.77   19.10
 -11   1  -1  322.47   19.30
  11  -1  -1  314.47   20.60
  11  -1   1  324.57   20.20
  -1 -11   1  392.06   20.70
  -1 -11   1  397.46   21.20
 -11   1   1  343.07   20.20
  11  -1   1  320.67   18.40
  -2 -11  -1  316.27   19.80
  11  -2  -1  278.47   18.00
  -2 -11  -1  297.87   18.60
  -2 -11  -1  284.47   17.60
  11  -2  -1  269.27   16.60
 -11   2  -1  277.77   16.60
  -2 -11   1  271.37   19.00
 -11   2   1  293.47   17.50
  -2 -11   1  247.78   18.20
  11  -2   1  281.27   17.50
  11  -2   1  297.37   16.00
 -11   3  -1 1099.39   55.69
  11  -3  -1 1103.69   57.19
  11  -3  -1 1104.29   55.99
  -3 -11   1 1146.79   57.89
  11  -3   1 1102.49   54.89
  11  -3   1 1099.79   56.69
 -11   3   1 1144.99   56.59
  -3 -11   1 1130.59   57.19
  -4 -11  -1   66.89   10.70
  11  -4  -1   48.50    6.60
  -4 -11  -1   67.29    9.70
 -11   4  -1   42.50    5.80
  -4 -11  -1   56.09    8.10
  11  -4   1   51.59    7.30
  -4 -11   1   53.29    7.70
  11  -4   1   49.00    6.20
 -11   5  -1    7.10    2.90
  11  -5  -1   13.00    4.30
   5  11  -1    9.00    2.50
  11  -5  -1   13.30    4.50
  -5 -11   1    8.00    4.70
   5  11   1   12.10    4.30
  -5 -11   1    1.50    5.20
 -11   5   1    6.00    3.30
  11  -5   1    9.10    3.90
  11  -5   1   10.40    3.40
   6  11  -1  113.99    7.10
  -6 -11  -1   91.39   10.50
 -11   6  -1   92.39    8.10
  11  -6  -1   91.89    9.60
  11  -6  -1   97.39    9.80
  11  -6   1   89.99    9.00
  11  -6   1   90.19    8.10
  -6 -11   1  119.39   10.90
   6  11   1   90.29    9.30
 -11   6   1   90.69    8.70
  11  -7  -1  616.64   34.50
  -7 -11  -1  606.14   35.40
  11  -7  -1  627.74   34.20
   7  11  -1  615.84   31.50
   7  11   1  641.14   33.10
 -11   7   1  621.74   33.70
  -7 -11   1  598.84   35.70
  11  -7   1  637.14   34.20
  11  -7   1  673.13   32.80
   8  11  -1  149.49    9.90
  11  -8  -1  144.59   12.20
  -8 -11  -1  189.18   16.30
  11  -8  -1  155.78   13.10
  11  -8   1  147.39   11.00
  -8 -11   1  168.88   14.30
 -11   8   1  149.99   11.50
   9  11  -1  121.59    8.40
  11  -9  -1  117.99   11.80
 -11   9   1  111.59    9.80
   9  11   1  122.09   10.20
  11  -9   1  106.29    9.70
  -9 -11   1   96.69   11.80
  10  11  -1   31.10    4.30
  11 -10  -1   24.60    6.70
 -10 -11   1   29.20    7.10
  11 -10   1   17.30    5.10
  10  11   1   32.00    5.90
  11 -11  -1    9.70    5.90
  11  11  -1   13.10    3.50
 -11 -11   1   13.30    5.40
  11  11   1   15.80    5.20
  11 -11   1   14.10    4.70
  11 -12  -1    1.10    5.40
  12  11  -1   -1.30    3.00
  12  11   1   -0.30    3.80
  11 -12   1   -1.80    4.00
  12  10  -1   27.40    4.40
  10 -12  -1   19.50    6.70
  12  10   1   26.00    5.50
  10 -12   1   24.50    5.70
  12   9  -1    4.80    3.20
   9 -12  -1    0.90    5.30
  12   9   1   -1.50    3.90
   9 -12   1   12.30    4.60
 -12  -9   1    4.90    4.20
  12   8  -1   -0.80    2.60
   8 -12  -1   -0.50    4.80
 -12  -8   1    1.10    3.50
  -8  12   1    1.20    3.10
  12   8   1    3.00    3.40
   8 -12   1   -2.00    3.60
  12   7  -1   11.30    3.60
   7 -12  -1   10.10    3.90
   7 -12  -1   15.80    5.90
  12   7  -1   10.70    4.80
  12   7   1   17.30    4.30
 -12  -7   1   25.50    5.80
  -7  12   1   12.80    4.30
   6 -12  -1   81.89   11.00
  12   6  -1   64.29    7.10
  12   6  -1   62.39    8.70
 -12  -6   1   72.19    9.30
   6 -12   1   58.49    7.70
  -6  12   1   94.49    8.70
  12   6   1   71.89    7.90
   5 -12  -1  129.69   10.30
 -12  -5  -1  139.59   12.60
   5 -12  -1   92.19   12.20
  -5  12  -1  134.59   11.20
  12   5  -1  127.89   11.50
  12   5  -1  122.49    9.80
  12   5   1  124.79   11.30
  -5  12   1  135.49   10.90
   5 -12   1   97.99    9.70
   5 -12   1  121.99    9.90
  12   5   1  117.49   10.00
 -12  -5   1  135.29   12.00
  12   4  -1   27.30    4.40
   4 -12  -1   18.30    6.10
  12   4  -1   16.90    5.10
   4 -12  -1   16.60    4.30
  -4  12  -1   11.00    4.60
 -12  -4  -1   22.00    4.70
  12   4   1   18.70    4.10
   4 -12   1   19.50    4.00
  12   4   1   20.10    5.00
  -4  12   1   17.80    4.90
   4 -12   1   19.10    4.50
 -12  -4   1   27.90    5.10
  -3  12  -1   33.20    5.70
  12   3  -1   45.10    6.10
  12   3  -1   36.90    6.70
   3 -12  -1   37.10    5.60
 -12  -3  -1   34.60    5.80
   3 -12  -1   36.30    6.60
   3 -12   1   36.00    5.80
 -12  -3   1   26.10    5.40
  12   3   1   54.69    6.20
  12   3   1   29.50    5.70
  -3  12   1   26.40    5.70
  12   2  -1    9.40    3.60
   2 -12  -1    9.60    5.10
   2 -12  -1    4.40    3.20
  12   2  -1   11.00    4.20
 -12  -2  -1   11.50    3.80
   2 -12   1   13.20    4.30
  12   2   1    5.90    3.70
 -12  -2   1   10.20    4.10
  -2  12   1   11.50    5.00
  12   2   1    8.80    3.30
   1 -12  -1  144.19   10.70
  12   1  -1  132.09   11.60
  12   1  -1  127.89   10.10
 -12  -1  -1  133.79   10.30
   1 -12   1  149.49   11.00
  -1  12   1  138.59   11.90
  12   1   1  127.89   11.00
  12   1   1  126.29    9.60
 -12  -1   1  126.29   11.00
  12   0  -1   36.30    6.30
 -12   0  -1   38.30    5.50
  12   0  -1   30.70    5.30
   0 -12  -1   44.90    8.30
   0 -12   1   38.40    6.10
   0 -12   1   44.20    7.00
  12   0   1   30.90    5.70
   0  12   1   34.70    6.10
  12   0   1   30.10    4.50
 -12   0   1   30.90    5.40
  12  -1  -1   66.69    9.30
 -12   1  -1   69.29    7.20
  12  -1  -1   74.89    7.90
  -1 -12  -1   71.99    9.70
  -1 -12  -1   77.99    8.40
  -1 -12  -1   74.29   10.20
  -1 -12   1   75.69    8.90
  12  -1   1   71.89    8.40
  12  -1   1   77.89    6.90
 -12   1   1   70.79    8.10
  -1 -12   1   78.49    9.40
  -2 -12  -1   -1.80    3.20
  12  -2  -1   -5.00    3.00
 -12   2  -1   -1.10    2.30
  12  -2  -1   -4.50    2.80
  -2 -12  -1    1.10    3.80
  -2 -12  -1  -14.40    5.90
  -2 -12   1    4.90    4.30
  12  -2   1   -0.70    3.10
 -12   2   1   -2.30    2.70
  12  -2   1    0.60    2.60
  -2 -12   1    5.50    4.90
  -3 -12  -1   51.49    9.70
  -3 -12  -1   59.99    8.60
  12  -3  -1   44.70    6.80
  -3 -12  -1   57.09    8.50
  12  -3  -1   51.99    7.30
 -12   3  -1   48.20    6.10
  12  -3   1   64.89    6.30
  12  -3   1   54.99    7.40
 -12   3   1   52.69    7.20
 -12   4  -1    5.40    3.10
  12  -4  -1    5.20    3.90
  -4 -12  -1   14.10    7.00
   4  12  -1    7.60    2.20
  12  -4  -1    0.60    3.70
  -4 -12  -1    2.50    6.70
  12  -4   1    9.60    3.50
  12  -4   1    3.60    3.90
 -12   4   1    7.20    3.50
  -4 -12   1    9.30    5.70
  -4 -12   1    8.40    5.50
  -5 -12  -1  206.58   16.10
  12  -5  -1  160.68   13.70
   5  12  -1  171.38   10.30
  12  -5  -1  182.88   13.40
  -5 -12   1  178.88   15.10
   5  12   1  189.78   12.80
  12  -5   1  172.48   13.40
  -5 -12   1  167.88   14.50
  12  -5   1  189.98   11.80
 -12   5   1  176.68   12.80
  12  -6  -1    2.80    4.30
  12  -6  -1    7.30    4.40
   6  12  -1   14.80    2.90
  -6 -12  -1   13.40    5.20
 -12   6   1    7.70    4.00
  -6 -12   1   13.50    5.00
   6  12   1    9.40    4.80
  12  -6   1    3.60    3.60
  12  -7  -1   39.20    6.60
  12  -7  -1   47.00    7.50
   7  12  -1   45.50    5.20
  -7 -12   1   51.19    9.00
 -12   7   1   39.40    6.00
  12  -7   1   38.40    5.70
   7  12   1   50.89    6.80
  12  -8  -1   20.10    5.90
   8  12  -1   17.60    3.40
  -8 -12   1   22.90    6.70
 -12   8   1   18.60    5.80
  12  -8   1   18.30    4.60
   8  12   1   23.60    5.60
   9  12  -1   39.00    5.30
  12  -9  -1   20.90    6.50
  -9 -12   1   32.20    7.40
  12  -9   1   19.10    4.90
   9  12   1   26.90    6.00
  10  12  -1    2.00    2.80
  12 -10  -1    0.60    5.10
  12 -10   1    4.30    4.40
 -10 -12   1    2.40    4.30
  10  12   1    7.90    4.40
  11  12  -1   21.20    4.10
  12 -11  -1   21.20    6.80
  11  12   1   23.00    6.00
  12 -11   1   32.40    6.10
  12  12  -1   -4.70    2.70
  12 -12  -1   -1.30    5.60
  12 -12   1   -1.30    4.20
  12  12   1    0.40    4.20
  12 -13  -1    7.10    7.00
  13  12  -1   -2.00    3.40
  13  12   1    2.20    4.50
  12 -13   1   -2.00    4.90
  13  11  -1  105.09    9.40
  11 -13  -1  114.79   14.30
  11 -13   1  135.99   12.10
  13  11   1  100.59   10.50
  13  10  -1   15.10    3.90
  10 -13  -1   12.10    6.40
  13  10   1    6.50    4.40
  10 -13   1    2.10    4.60
   9 -13  -1  135.59   15.00
  13   9  -1  166.88   11.30
   9 -13   1  167.18   13.40
  13   9   1  168.18   12.30
  13   8  -1   40.50    5.40
   8 -13  -1   43.10    8.10
  13   8   1   44.90    6.30
   8 -13   1   31.50    6.60
  13   7  -1   -3.60    3.10
   7 -13  -1   -1.30    5.20
 -13  -7   1    1.70    3.80
  13   7   1   -5.00    3.50
   7 -13   1   12.40    4.60
  -7  13   1    0.50    3.40
  13   6  -1   12.90    3.80
  13   6  -1   12.80    5.10
   6 -13  -1    5.90    5.60
   6 -13  -1   18.20    4.50
  -6  13   1   12.00    4.40
 -13  -6   1   15.20    5.20
   6 -13   1   13.40    4.40
   5 -13  -1   84.99   10.30
  13   5  -1   88.79    8.10
   5 -13  -1   91.39    8.70
  13   5  -1   91.49   10.00
  -5  13   1   83.19    9.10
   5 -13   1   86.39    8.40
 -13  -5   1   89.59    9.60
  13   5   1   70.39    8.00
  13   4  -1  168.78   11.30
  13   4  -1  155.58   13.20
   4 -13  -1  166.18   11.90
   4 -13  -1  141.99   13.40
 -13  -4   1  164.18   13.00
  13   4   1  158.28   11.20
  -4  13   1  160.68   12.80
  13   3  -1    0.90    3.40
   3 -13  -1    6.40    5.20
   3 -13  -1    9.50    3.70
  13   3  -1    5.90    3.90
 -13  -3   1    6.20    4.20
  13   3   1    8.00    3.40
  -3  13   1    4.70    3.80
   2 -13  -1   66.69    8.90
   2 -13  -1   59.49    7.50
  13   2  -1   58.29    7.40
  13   2  -1   53.69    7.90
   2 -13   1   69.89    8.60
 -13  -2   1   58.79    8.40
  13   2   1   53.99    8.20
  -2  13   1   68.39    9.10
  13   2   1   50.39    6.30
  13   1  -1    8.60    3.80
   1 -13  -1    2.40    3.50
   1 -13  -1    0.90    6.10
  13   1  -1    2.70    4.10
 -13  -1   1    8.50    4.10
   1 -13   1   12.40    4.10
  13   1   1    5.00    3.20
  13   1   1    1.90    3.80
  -1  13   1    1.00    4.60
  -1 -13  -1  779.52   40.30
  -1 -13  -1  786.72   42.10
  13  -1  -1  721.63   38.30
  -1 -13  -1  712.63   40.30
  13  -1  -1  731.83   40.30
  -1 -13   1  697.53   39.50
  13  -1   1  711.13   39.70
  -1 -13   1  721.43   39.10
 -13   1   1  775.02   39.80
  13  -1   1  736.23   37.60
  13  -2  -1   29.60    6.40
  13  -2  -1   22.80    5.00
  13  -2   1   22.30    4.20
  13  -2   1   24.10    6.20
 -13   2   1   26.00    5.70
  -2 -13   1   28.40    7.60
  -2 -13   1   19.30    6.10
  -3 -13  -1  778.92   41.90
  13  -3  -1  752.32   41.60
  13  -3  -1  729.83   40.10
  -3 -13  -1  884.61   42.70
  13  -3   1  747.33   39.10
 -13   3   1  778.62   40.80
  -3 -13   1  706.03   40.90
  -3 -13   1  783.62   42.50
  -4 -13  -1   45.30    9.40
  -5 -13  -1   28.20    7.40
  13  -5  -1   25.30    5.50
  13  -5  -1   13.30    4.70
 -13   5   1   18.20    4.40
  -5 -13   1   22.70    6.60
  13  -5   1   28.10    4.60
   5  13   1   17.80    5.20
  13  -6  -1   -6.00    3.90
  13  -6   1   -6.30    3.00
   6  13   1   -1.70    3.90
 -13   6   1    0.90    3.50
  -6 -13   1   -3.10    3.60
  13  -7  -1  580.84   33.00
   7  13  -1  610.94   31.00
   7  13   1  594.04   31.60
  -7 -13   1  572.64   34.30
  13  -7   1  586.64   31.50
  13  -8  -1   -2.70    4.70
   8  13  -1   16.80    3.30
  -8 -13   1    4.90    5.60
   8  13   1   10.50    4.90
  13  -9  -1  281.77   20.00
   9  13  -1  268.87   16.10
  13  -9   1  289.17   18.10
   9  13   1  297.27   18.10
  -9 -13   1  294.77   21.10
  10  13  -1   -0.20    2.90
  13 -10  -1   -3.10    5.00
  10  13   1   -2.70    4.00
  13 -10   1    0.60    4.20
  13 -11  -1   13.60    7.10
  11  13  -1   20.40    4.10
  13 -11   1   22.00    6.10
  11  13   1   22.40    6.20
  12  13  -1   36.40    5.40
  13 -12  -1   41.90    8.90
  13 -12   1   45.60    7.70
  12  13   1   47.30    7.20
  13  13  -1   81.59    9.30
  13 -13   1   81.29   11.40
  13  13   1   93.79   10.50
  13 -14  -1   56.19   10.90
  14  13  -1   54.59    8.20
  14  13   1   67.39    8.50
  12 -14  -1    0.90    6.80
  14  12  -1   -1.20    3.70
  14  12   1    6.40    4.70
  11 -14  -1    8.30    7.50
  14  11  -1   15.20    4.50
  14  11   1   20.70    5.70
  14  10  -1    5.70    3.80
  10 -14  -1    7.30    6.30
  14  10   1    5.30    4.20
  14   9  -1   12.90    4.10
   9 -14  -1   12.60    6.50
  14   9   1   12.80    4.50
   8 -14  -1    8.70    6.00
  14   8  -1   18.30    4.50
  14   8   1   20.40    4.80
   7 -14  -1   26.20    7.40
  14   7   1   30.60    5.50
   6 -14  -1    1.90    5.20
  14   6  -1    7.10    3.50
  14   6   1    5.80    3.50
  14   5  -1   14.80    4.30
   5 -14  -1   16.00    6.00
  14   5   1   10.70    4.20
  -5  14   1   15.80    5.40
  14   4  -1    0.40    3.40
   4 -14  -1    0.20    4.70
  14   4   1    2.80    3.50
  -4  14   1    7.40    4.30
 -14  -4   1    4.60    3.60
  14   3  -1    9.70    4.30
  14   3  -1   12.40    5.30
   3 -14  -1    4.40    5.40
  14   3   1   13.80    3.90
 -14  -3   1   11.30    4.40
  -3  14   1   13.30    5.10
  14   2  -1   -2.70    3.30
   2 -14  -1    3.90    4.90
  14   2  -1    4.10    4.00
  -2  14   1    0.30    4.40
 -14  -2   1    1.10    3.60
  14   2   1    0.70    3.10
  14   1  -1   -5.70    3.10
   1 -14  -1    3.90    5.50
  14   1  -1   -3.40    3.30
 -14  -1   1   -2.60    2.90
  -1  14   1   -5.30    3.60
  14   1   1   -4.70    2.70
  14   0  -1    7.90    4.40
   0 -14  -1    5.40    6.20
   0 -14  -1    7.60    5.00
  14   0  -1    6.90    4.10
 -14   0   1    6.60    4.10
  14   0   1    5.30    3.30
   0 -14   1    7.30    4.60
  -1 -14  -1   70.59   10.20
  -1 -14  -1   66.09    9.90
  14  -1  -1   67.19    8.10
  14  -1  -1   57.59    8.50
  14  -1   1   72.49    7.20
 -14   1   1   56.99    8.20
  -1 -14   1   74.59    9.30
  -2 -14  -1    2.50    4.80
  14  -2  -1    2.00    5.40
  14  -2  -1    2.30    3.50
  -2 -14  -1   -1.60    6.20
  -2 -14   1   -1.40    4.60
  14  -2   1    0.00    2.80
 -14   2   1   -1.50    2.80
  -3 -14  -1   19.10    7.60
  14  -3  -1   18.70    4.90
  -3 -14  -1   19.10    6.70
 -14   3   1   11.80    4.60
  14  -3   1   16.20    4.10
  -3 -14   1   27.90    8.20
  14  -4  -1   72.29    8.80
  14  -4   1   62.29    7.40
  -4 -14   1   74.79   10.50
  14  -5  -1  204.68   14.80
  14  -5   1  195.18   13.40
   5  14   1  206.78   14.10
  -5 -14   1  194.78   16.60
   6  14   1   59.29    8.40
  14  -6   1   74.39    8.70
  -6 -14   1   77.79   10.90
  -7 -14   1   14.40    6.00
  14  -7   1   27.80    5.30
   7  14   1   21.40    5.30
  14  -8  -1   -6.60    4.50
   8  14   1    2.00    4.80
  14  -8   1    1.40    3.90
  -8 -14   1   13.80    6.20
  14  -9  -1   44.10    8.40
  14  -9   1   43.30    6.90
   9  14   1   37.90    7.10
  14 -11  -1   22.70    7.80
  11  14   1   35.20    7.00
  14 -11   1   30.50    6.80
  14 -12  -1   14.90    7.20
  14 -12   1    4.70    5.20
  12  14   1    8.50    5.10
  14 -13  -1    5.30    7.30
  13  14   1    9.10    5.40
  14 -13   1    2.20    5.60
  14 -14  -1    5.10    7.40
  14  14   1    0.90    4.50
  14 -15  -1   18.80    8.90
  15  14   1   17.90    5.70
  13 -15  -1   -7.90    6.70
  15  13   1   -1.70    4.50
  15  12  -1   -4.20    3.70
  12 -15  -1   -6.60    6.40
  15  12   1   -0.50    4.10
  15  11  -1  183.08   13.70
  11 -15  -1  220.28   18.90
  15  11   1  189.08   14.20
  10 -15  -1   19.30    7.90
  15  10  -1   19.80    5.10
  15  10   1   29.10    6.00
  15   9  -1  211.08   14.40
   9 -15  -1  202.98   18.10
  15   9   1  208.78   14.70
   8 -15  -1    1.30    5.90
  15   8  -1    4.20    4.00
  15   8   1   -1.30    3.70
  15   7  -1    1.60    3.40
   7 -15  -1   -3.40    5.10
  15   7   1   -2.50    3.50
  15   6  -1   17.60    4.80
   6 -15  -1   15.10    6.40
  15   6   1   15.50    4.70
  15   5  -1  171.68   12.50
   5 -15  -1  155.88   14.80
  15   5   1  180.38   12.40
   4 -15  -1   28.20    7.30
  15   4  -1   37.60    6.00
  15   4   1   44.30    6.10
  15   3  -1  402.16   22.80
   3 -15  -1  377.06   24.40
  -3  15   1  412.56   26.00
  15   3   1  388.16   22.30
   2 -15  -1   -7.80    5.40
  15   2  -1   -3.50    3.60
  -2  15   1   -4.80    4.00
  15   2   1   -2.40    3.10
   1 -15  -1   13.00    6.30
  15   1  -1    5.90    3.90
  -1  15   1   15.00    5.20
  15   1   1    7.10    3.40
   1 -15   1   -3.30    3.80
   0 -15  -1   89.29   12.70
  15   0  -1  105.19    9.90
   0 -15   1  116.09   12.00
  15   0   1  110.89    9.20
  15  -1  -1   61.09    8.20
  -1 -15  -1   68.59   10.40
  15  -1   1   73.39    7.50
  -1 -15   1   84.99   11.40
  15  -2  -1   69.09    8.40
  -2 -15  -1   73.59   10.70
  15  -2   1   55.29    7.40
  -2 -15   1   64.99   10.20
  15  -3  -1   -4.80    3.80
  -3 -15  -1    6.40    7.20
  15  -3   1    7.10    3.90
  -3 -15   1    2.70    7.10
  15  -4  -1   -0.50    4.10
   4  15   1    9.30    4.70
  15  -4   1    4.30    3.90
  -4 -15   1   10.60    6.00
  15  -5  -1   -4.70    4.30
   5  15   1   13.90    5.30
  15  -5   1   -0.70    3.70
  -5 -15   1    4.10    4.80
  15  -6  -1   25.30    6.80
   6  15   1   37.00    6.40
  15  -6   1   24.80    5.50
  -6 -15   1   36.40    8.00
  15  -7  -1   58.19    9.20
   7  15   1   60.79    7.80
  15  -7   1   55.49    7.50
  -7 -15   1   43.00    9.40
   8  15   1   99.49   10.80
  15  -8   1  113.29   11.00
  15  -9  -1   11.00    6.30
   9  15   1   17.90    5.70
  15  -9   1   16.90    5.70
  15 -10  -1   14.00    7.10
  15 -10   1   14.00    5.90
  10  15   1   22.40    6.20
  15 -11  -1  125.99   15.10
  15 -11   1  139.49   13.60
  11  15   1  128.39   11.80
  15 -12  -1   -4.60    6.50
  15 -12   1    4.00    5.60
  12  15   1    1.60    4.90
  15 -13  -1  283.27   23.10
  15 -13   1  308.27   21.50
  13  15   1  289.77   19.10
  15 -14  -1    1.70    7.40
  14  15   1   -1.30    4.60
  15 -15  -1    0.40    7.90
  15  15   1   -0.10    4.50
  16  15   1   -1.30    4.80
  14 -16  -1   -4.50    8.50
  16  14   1   -2.10    4.50
  13 -16  -1    6.00    7.40
  16  13   1    5.10    4.90
  16  12  -1   14.10    5.20
  12 -16  -1   15.10    8.50
  16  12   1   10.10    5.10
  16  11  -1    0.00    4.30
  11 -16  -1    5.70    7.30
  16  11   1    1.90    4.30
  16  10  -1    0.60    4.30
  10 -16  -1   -0.60    6.90
  16  10   1    4.90    4.50
   9 -16  -1   42.30    9.60
  16   9  -1   50.99    7.00
  16   9   1   49.99    7.20
   8 -16  -1   23.80    8.40
  16   8  -1   37.60    6.20
  16   8   1   41.10    6.40
  16   7  -1   88.39    9.30
   7 -16  -1   66.29   10.60
  16   7   1   77.79    9.40
   6 -16  -1   17.90    7.00
  16   6  -1   18.90    5.00
   5 -16  -1    0.20    5.50
  16   5  -1    2.80    4.00
  16   5   1    6.00    3.80
   4 -16  -1    9.50    6.00
  16   4  -1   10.40    4.40
  16   4   1    2.20    3.50
  16   3  -1   16.70    5.10
   3 -16  -1   17.00    7.30
  16   3   1   12.50    4.20
   2 -16  -1   -6.10    5.80
  16   2  -1   -2.10    3.90
  16   2   1   10.30    3.90
   1 -16  -1   47.70    9.00
  16   1  -1   24.00    5.80
   1 -16   1   24.40    6.30
  16   1   1   35.20    5.60
  16   0  -1   -3.50    3.70
   0 -16  -1   23.90    7.90
  16   0   1    1.90    3.80
   0 -16   1    1.00    3.70
  -1 -16  -1   -9.20    6.20
  16  -1  -1    0.80    3.90
  16  -1   1   -0.80    3.60
  -1 -16   1    1.90    5.20
  16  -2  -1    0.70    4.00
  -2 -16  -1    2.80    6.90
  -2 -16   1    1.40    5.50
  16  -2   1    1.90    3.60
  16  -3  -1   12.60    5.30
  -3 -16   1   13.50    8.40
  16  -3   1    6.40    4.10
  16  -4  -1   10.80    5.10
   4  16   1   11.80    5.60
  -4 -16   1   12.30    6.60
  16  -4   1    7.00    4.40
  16  -5  -1    1.90    4.70
  16  -5   1   -4.10    3.90
  -5 -16   1   -0.10    4.90
   5  16   1    0.40    5.00
  16  -6  -1    0.50    5.30
   6  16   1    3.60    4.60
  16  -6   1   -0.20    4.20
  16  -7  -1    0.30    5.30
  16  -7   1   -1.60    4.10
   7  16   1   -2.60    5.00
  16  -8  -1   16.90    6.70
  16  -8   1   19.40    5.90
   8  16   1   27.10    7.40
  16  -9  -1   16.30    7.10
  16  -9   1    3.00    5.10
   9  16   1   17.30    7.20
  16 -10  -1   11.80    7.50
  16 -10   1   13.60    6.40
  10  16   1   23.20   10.20
  16 -11  -1   -0.40    6.40
  16 -11   1    7.30    6.10
  16 -12  -1   -4.50    6.70
  16 -12   1   -7.40    5.30
  16 -13  -1    1.20    7.00
  16 -13   1    0.40    5.90
  16 -14  -1   17.40    8.70
  16 -15  -1   29.20   10.40
  17  15   1   76.59   10.20
  17  14   1   -2.30    5.00
  17  13   1    3.70    5.10
  17  12  -1    8.70    5.20
  17  12   1   14.00    5.50
  17  11  -1    9.70    5.10
  17  11   1    9.50    5.00
  17  10  -1   31.50    6.40
  17  10   1   28.00    6.20
  17   9  -1    2.80    4.70
  17   9   1    2.10    4.30
  17   8  -1    8.40    4.70
  17   8   1    9.40    4.80
  17   7  -1    4.20    4.40
  17   7   1    2.90    4.20
  17   6  -1   34.50    6.50
  17   6   1   27.80    6.00
  17   5  -1   48.10    7.30
  17   5   1   49.50    7.00
  17   4  -1   32.60    6.80
  17   4   1   45.40    6.50
  17   3  -1   26.60    6.00
  17   3   1   19.80    5.30
  17   2  -1   -2.10    4.20
  17   2   1   -1.30    3.90
   2 -17   1    1.00    4.50
  17   1  -1   63.19    8.50
   1 -17   1   56.59    9.40
  17   0  -1    3.30    4.60
  17   0   1    0.70    4.00
   0 -17   1    1.30    4.50
  17  -1  -1  373.66   23.60
  17  -1   1  402.16   22.90
  -1 -17   1  377.66   26.30
  17  -2  -1    7.20    5.10
  17  -2   1    7.20    4.30
  -2 -17   1   11.00    7.00
  17  -3  -1   75.19   10.30
  -3 -17   1  134.09   16.80
  17  -3   1   71.99    9.60
  17  -4  -1   -4.90    4.80
  17  -4   1   -3.10    4.00
  17  -5  -1   54.39    9.10
  17  -5   1   72.09    8.90
  17  -6  -1    9.10    6.30
  17  -6   1    7.80    4.90
  17  -7  -1   76.99   10.90
  17  -7   1   90.59   10.80
  17  -8  -1   24.10    8.20
  17  -8   1   36.30    7.20
  17  -9  -1   38.30    9.20
  17  -9   1   30.70    7.70
  17 -10  -1    0.60    7.70
  17 -10   1   -5.60    5.40
  17 -11  -1    4.70    7.80
  17 -11   1   14.40    6.80
  17 -12  -1   58.79   11.70
  17 -12   1   61.99   10.50
  17 -13  -1    0.80    8.00
  17 -13   1    2.80    7.70
  17 -14  -1   22.50    9.80
  17 -15  -1   -4.80    8.10
  18  14   1   -2.30    4.80
  18  13   1   16.40    6.00
  18  12  -1   -2.10    4.90
  18  12   1   -1.80    4.80
  18  11  -1    4.40    5.00
  18  11   1    2.50    4.70
  18  10  -1    9.20    5.20
  18  10   1    8.40    5.00
  18   9  -1   -1.60    4.60
  18   9   1    0.70    4.20
  18   8  -1    0.40    4.50
  18   8   1    7.40    4.90
  18   7  -1   -0.30    4.50
  18   7   1    1.10    4.30
  18   6  -1   10.30    5.40
  18   6   1    9.70    5.00
  18   5  -1    3.80    5.00
  18   5   1    3.30    4.60
  18   4  -1   -2.70    4.70
  18   4   1    1.50    4.30
  18   3  -1    2.20    5.20
  18   3   1    5.50    4.50
  18   2  -1   10.20    5.60
  18   2   1   10.00    4.70
   2 -18   1   31.40    6.70
  18   1  -1   12.60    6.10
   1 -18   1   12.60    5.50
  18   1   1   20.80    5.50
  18   0  -1   -0.20    4.80
  18   0   1    1.30    4.30
   0 -18   1   -0.90    5.70
  18  -1  -1    3.30    5.10
  18  -1   1    2.70    4.50
  18  -2  -1   10.20    5.80
  18  -2   1    8.50    5.00
  18  -3  -1   82.69   11.50
  18  -3   1   69.39    9.00
  18  -4  -1    7.40    6.50
  18  -4   1    8.10    5.30
  18  -5  -1   43.20    8.90
  18  -5   1   41.50    7.60
  18  -6  -1    8.90    6.50
  18  -6   1    8.00    5.40
  18  -7  -1    5.50    6.10
  18  -7   1    2.40    5.30
  18  -8  -1    1.00    6.40
  18  -8   1    2.40    5.80
  18  -9  -1    5.40    7.10
  18  -9   1   -1.70    5.70
  18 -10  -1    1.10    7.70
  18 -10   1   -6.10    5.50
  18 -11  -1    1.70    7.70
  18 -11   1    0.20    6.50
  18 -12  -1    0.00    7.80
  18 -12   1    6.60    7.00
  18 -13  -1    0.60    8.10
  18 -14  -1   10.40    9.20
  19  12  -1    4.80    6.00
  19  12   1    9.50    5.70
  19  11  -1  126.39   13.50
  19  11   1  128.19   12.70
  19  10  -1   23.20    6.90
  19  10   1   12.00    5.70
  19   9  -1   89.89   12.00
  19   9   1   88.89   10.80
  19   8  -1    4.40    5.40
  19   8   1    0.10    4.60
  19   7  -1    5.90    5.50
  19   7   1   10.80    5.20
  19   6  -1   34.10    7.30
  19   6   1   34.40    6.90
  19   5  -1   76.49   10.30
  19   5   1   74.99   10.30
  19   4  -1   35.40    7.70
  19   4   1   47.70    7.50
  19   3  -1   46.80    8.40
  19   3   1   40.00    7.20
  19   2  -1   12.10    6.10
  19   2   1    9.70    5.10
  19   1  -1   -0.50    5.50
  19   1   1    2.30    4.70
  19   0  -1   44.60    8.60
  19   0   1   64.89    8.50
  19  -1  -1   14.50    6.10
  19  -1   1    8.10    5.10
  19  -2  -1    2.80    5.60
  19  -2   1   -0.20    4.50
  19  -3  -1   29.40    7.90
  19  -3   1   36.40    7.40
  19  -4  -1    5.60    6.00
  19  -4   1    2.50    5.10
  19  -5  -1   35.80    8.50
  19  -5   1   39.70    7.70
  19  -6  -1    1.90    6.80
  19  -6   1   28.50    6.80
  19  -7  -1  137.89   16.00
  19  -7   1  123.49   14.10
  19  -8  -1   -0.70    6.80
  19  -8   1   -0.90    5.70
  19  -9  -1    2.50    7.60
  19  -9   1    1.70    6.20
  19 -10  -1    2.00    7.70
  19 -10   1    3.60    6.70
  19 -11  -1  113.19   15.70
  19 -11   1  125.59   15.50
  19 -12  -1    9.20    8.90
  19 -12   1   15.30    8.00
  20  11  -1    0.10    5.70
  20  10  -1   -2.00    5.70
  20  10   1    0.10    5.10
  20   9  -1   28.30    8.10
  20   8  -1    2.50    6.20
  20   8   1    5.90    5.40
  20   7  -1   18.80    7.20
  20   7   1   23.90    6.50
  20   6  -1    3.70    5.80
  20   6   1    2.30    4.80
  20   5  -1    7.40    6.10
  20   5   1    0.90    4.90
  20   4  -1    6.90    5.80
  20   4   1    5.00    5.30
  20   3  -1    0.00    5.70
  20   3   1    2.20    5.10
  20   2  -1   -4.90    5.50
  20   2   1   -1.90    4.90
  20   1  -1    3.30    6.00
  20   1   1    4.40    5.30
  20   0  -1   -2.60    5.30
  20   0   1    0.00    5.20
  20  -1  -1    1.70    5.60
  20  -1   1   -1.60    5.40
  20  -2  -1    4.90    6.30
  20  -2   1   -2.60    5.00
  20  -3  -1    1.00    6.10
  20  -3   1    3.10    5.50
  20  -4  -1   -1.90    6.20
  20  -4   1    3.50    5.60
  20  -5  -1    0.40    6.70
  20  -5   1   -2.10    5.40
  20  -6  -1    0.00    6.80
  20  -6   1    1.90    5.90
  20  -7  -1    2.70    7.30
  20  -7   1    9.10    6.80
  20  -8  -1  -12.10    7.20
  20  -8   1    2.60    6.70
  20  -9  -1   13.40    8.70
  20  -9   1    9.40    7.30
  20 -10  -1   -6.10    7.60
  20 -10   1    3.50    7.30
  20 -11  -1    7.00    8.00
  20 -11   1   10.20    7.60
  21   8  -1    6.70    7.00
  21   8   1    0.30    5.10
  21   7  -1   34.10    8.40
  21   7   1   31.70    7.30
  21   6  -1    5.60    6.50
  21   6   1    6.20    5.50
  21   5  -1  156.08   16.10
  21   5   1  168.98   14.90
  21   4  -1   -4.80    6.00
  21   4   1   -6.00    5.00
  21   3  -1   -4.50    5.90
  21   3   1   13.60    6.20
  21   2  -1   15.90    7.30
  21   2   1    6.50    6.10
  21   1  -1  110.09   14.20
  21   1   1  114.99   13.20
  21   0  -1   43.80    9.20
  21   0   1   36.60    8.20
  21  -1  -1  104.79   14.10
  21  -1   1   87.09   11.60
  21  -2  -1    9.20    7.20
  21  -2   1    7.60    6.50
  21  -3  -1    7.20    7.60
  21  -3   1   -1.00    6.00
  21  -4  -1    3.40    7.30
  21  -4   1    9.20    6.60
  21  -5  -1   25.00    9.00
  21  -5   1   17.10    7.40
  21  -6  -1   23.50    8.90
  21  -6   1   21.30    7.70
  21  -7  -1   -4.00    7.60
  21  -7   1    6.50    6.80
  21  -8  -1   -2.30    8.20
  21  -8   1    1.80    6.90
  22   6  -1    5.80    6.90
  22   6   1    1.70    5.70
  22   5  -1    6.50    7.00
  22   5   1    5.70    5.70
  22   4  -1   -6.20    6.40
  22   4   1    6.80    6.30
  22   3  -1   29.90    9.00
  22   3   1   31.90    8.00
  22   2  -1   -6.20    6.30
  22   2   1    0.70    6.00
  22   1  -1    6.60    7.10
  22   1   1    9.40    6.70
  22   0  -1    4.90    7.20
  22   0   1    3.20    6.30
  22  -1  -1   15.60    8.40
  22  -1   1   13.30    7.30
  22  -2  -1   -1.40    7.30
  22  -2   1   -6.30    6.30
  22  -3  -1   22.20    9.10
  22  -3   1   20.60    7.70
  22  -4  -1   -2.50    7.60
  22  -4   1    2.50    6.70
  22  -5  -1   17.00    8.80
  22  -5   1    6.60    6.50
  22  -6  -1    1.90    7.70
  22  -6   1   -3.50    6.60
   0   0  -2 2378.06  114.49
   1   0  -2  356.06   21.70
   0   1  -2  498.55   22.40
   0  -1  -2  406.66   22.50
   1  -1  -2  158.58    9.50
   1   1  -2  121.89    8.60
  -1   1   2  135.59    7.50
   1  -2  -2 1039.80   50.39
   2   1  -2 1039.90   51.09
  -1   2  -2  959.10   51.19
   1  -2  -2 1111.29   52.09
  -2  -1  -2 1084.99   52.39
   2   1  -2 1031.60   50.69
  -1   2   2 1058.59   50.39
   0   2  -2  240.68   15.40
   2   0  -2  286.57   15.60
   2   0  -2  284.07   14.70
   0   2   2  328.67   14.50
  -2   0   2  278.47   14.70
   2  -1  -2  969.50   45.20
  -1  -2  -2  909.21   45.90
   2  -1  -2  879.01   44.10
   1   2  -2  876.41   44.50
  -2   1  -2  899.51   45.30
  -1  -2   2  872.11   44.00
  -2   1   2  955.60   44.20
  -2   2  -2   93.89    8.10
  -2  -2  -2   89.09    9.40
   2   2  -2   99.89    6.80
   2  -2  -2  108.69    6.50
   2   2  -2   94.79    6.30
  -2  -2   2   92.49    6.40
  -2   2   2  107.69    6.20
   2  -3  -2  203.08   11.20
  -3  -2  -2  181.78   13.50
   2  -3  -2  219.78   12.80
   3   2  -2  215.18   11.40
   3   2  -2  202.68   11.50
  -3  -2   2  200.88   11.40
  -2   3   2  192.48   11.00
  -1   3  -2  781.92   40.60
   3   1  -2  800.82   40.70
  -3  -1  -2  832.12   42.20
   3   1  -2  792.82   40.60
   1  -3  -2  877.71   40.30
   1  -3  -2  914.71   42.20
  -3  -1   2  781.02   40.60
  -1   3   2  834.82   40.20
   3   0  -2   68.09    5.70
   0  -3  -2   72.19    7.60
   0   3  -2   50.39    5.50
   0  -3  -2   50.79    4.10
   3   0  -2   52.69    4.90
  -3   0   2   57.69    4.60
   0   3   2   57.29    4.20
   3  -1  -2   26.50    3.80
   3  -1  -2   34.50    3.40
  -1  -3  -2   25.70    5.40
  -3   1  -2   53.79    6.80
  -1  -3  -2   29.60    2.90
  -3   1   2   29.50    3.30
   1   3   2   37.70    3.60
   2   3  -2   90.49    6.00
  -2  -3  -2   90.29    5.40
  -2  -3  -2   69.59    8.60
   2   3  -2   81.59    6.40
   3  -2  -2   96.99    6.30
   2   3   2   95.29    5.90
  -3   2   2   96.29    6.00
  -2  -3   2   88.59    6.20
   3  -3  -2 1503.65   72.09
   3   3  -2 1399.96   70.79
  -3  -3  -2 1408.96   72.79
   3  -3  -2 1581.94   71.29
  -3  -3  -2 1400.46   70.49
   3   3  -2 1505.65   71.39
  -3   3   2 1638.14   71.19
  -3  -3   2 1457.25   71.49
   3  -3   2 1417.46   70.49
   3   3   2 1391.76   70.79
   3  -4  -2   54.19    6.40
   4   3  -2   68.19    5.70
   3  -4  -2   63.59    5.30
  -4  -3  -2   84.39    5.20
   4   3   2   73.59    5.20
  -4  -3   2   67.39    5.90
  -3   4   2   65.59    5.20
   2  -4  -2  233.18   13.00
  -4  -2  -2  257.17   16.00
   2  -4  -2  229.48   14.60
   4   2  -2  246.38   13.30
   4   2  -2  256.57   13.70
   2  -4   2  230.68   12.20
  -4  -2   2  237.68   13.50
   4   2   2  238.18   12.70
   2  -4   2  235.28   12.50
  -2   4   2  230.88   12.90
   1  -4  -2  476.55   24.90
   4   1  -2  462.55   23.50
   4   1  -2  470.25   23.60
   1  -4  -2  470.15   22.90
  -1   4  -2  409.46   22.90
  -4  -1   2  447.06   23.40
   1  -4   2  447.56   22.80
   4   0  -2  448.66   21.50
   4   0  -2  443.46   21.50
   0  -4  -2  397.86   20.50
   0  -4  -2  381.26   22.60
   0   4   2  389.66   20.70
   0  -4   2  352.96   20.70
   4   0   2  405.86   21.10
  -4   0   2  443.86   21.40
   4  -1  -2  324.97   16.40
   4  -1  -2  280.57   15.70
   1   4  -2  281.37   15.10
   4  -1   2  292.87   15.60
  -1  -4   2  274.47   15.50
  -4   1   2  302.67   15.80
  -2  -4  -2   51.59    6.50
   2   4  -2   47.60    4.50
  -2  -4  -2   53.39    4.00
   4  -2  -2   39.40    4.90
   2   4  -2   52.79    4.50
  -2  -4  -2   62.49    4.60
  -2  -4   2   61.69    4.80
  -4   2   2   48.90    4.50
   2   4   2   42.80    4.60
   4  -2   2   54.29    4.30
   3   4  -2   85.19    5.50
  -3  -4  -2   58.59    5.20
  -3  -4  -2   71.09    5.10
   3   4  -2   87.19    5.90
   4  -3  -2   63.39    6.50
   4  -3  -2   72.69    6.00
  -3  -4  -2   68.99    8.50
  -4   3   2   67.19    5.50
   4  -3   2   71.59    4.90
  -3  -4   2   68.59    5.80
   4   4  -2   44.40    4.60
   4   4  -2   51.89    4.90
  -4  -4  -2   53.79    7.50
  -4  -4  -2   46.60    4.40
  -4  -4  -2   47.20    4.30
   4  -4  -2   51.59    4.80
   4   4   2   43.60    4.40
  -4   4   2   43.20    4.30
   4  -4   2   42.00    3.60
   4  -4   2   39.10    3.70
   4  -5  -2  183.28   12.10
   4  -5  -2  182.98   10.60
  -5  -4  -2  166.68   10.30
  -4   5  -2  167.38    9.60
  -5  -4  -2  160.78   13.50
   5   4  -2  163.48   10.10
   5   4  -2  180.18   11.00
   4  -5   2  163.28    9.00
   5   4   2  165.48   10.30
  -5  -4   2  174.78   11.00
  -4   5   2  175.38   10.20
   4  -5   2  166.58    9.50
   3  -5  -2  200.98   11.50
   3  -5  -2  197.68   13.10
  -3   5  -2  192.88   10.90
   5   3  -2  204.88   12.10
  -5  -3  -2  199.68   11.30
   3  -5   2  197.38   10.20
   3  -5   2  198.08   10.90
  -3   5   2  199.38   11.40
   5   3   2  206.68   11.50
  -5  -3   2  193.48   12.00
   5   2  -2   82.49    6.70
   5   2  -2   90.69    6.60
  -5  -2  -2   82.79    5.60
   2  -5  -2   97.09    6.20
  -2   5   2   86.89    6.10
  -5  -2   2   86.69    6.70
   5   2   2   84.09    5.90
   5   2   2   80.79    6.50
   2  -5   2   84.39    5.80
   5   1  -2  308.27   16.40
   1  -5  -2  288.57   17.70
   5   1  -2  321.97   16.70
   1  -5  -2  290.87   15.60
  -1   5   2  285.97   15.80
   5   1   2  298.37   15.50
   5   1   2  291.57   16.10
   1  -5   2  276.07   15.50
  -5  -1   2  297.67   16.40
   0  -5  -2   18.70    4.70
   0  -5  -2   13.40    2.30
   5   0  -2   16.00    3.30
   5   0  -2   15.10    3.20
   5   0   2   11.60    2.00
   0   5   2   16.00    2.80
  -5   0   2   13.10    2.80
   5   0   2   16.70    2.90
  -1  -5  -2  232.08   12.20
  -1  -5  -2  229.68   15.00
   5  -1  -2  216.78   12.80
   5  -1  -2  214.48   13.00
   1   5   2  223.98   12.50
   5  -1   2  210.58   12.30
  -5   1   2  214.28   12.60
  -1  -5   2  235.58   12.90
   5  -2  -2  420.96   20.30
   5  -2  -2  376.86   20.30
  -2  -5  -2  350.36   21.60
   2   5  -2  429.66   19.90
  -2  -5  -2  356.66   19.20
  -2  -5  -2  352.16   19.60
  -5   2   2  384.96   19.80
   5  -2   2  364.66   18.90
   2   5   2  351.06   19.60
   5  -2   2  363.16   19.20
  -2  -5   2  352.56   19.80
   5  -3  -2  119.49    8.40
   3   5  -2  135.99    7.40
   5  -3  -2   98.69    8.80
   3   5  -2  115.49    8.10
   5  -3   2  111.49    7.40
  -3  -5   2  117.69    8.60
  -5   3   2  145.69    8.30
   5  -4  -2   11.50    3.00
  -5   4  -2   15.00    2.20
   4   5  -2   16.00    2.60
   5  -4  -2   13.10    3.60
  -4  -5  -2   17.60    3.00
   4   5  -2   14.10    2.90
  -4  -5  -2   12.40    4.80
  -4  -5  -2   14.30    2.80
  -4  -5   2   14.20    3.10
   4   5   2    8.50    2.20
   5  -4   2   13.10    2.10
  -5   4   2   12.40    2.80
   5  -4   2   16.40    2.30
  -5  -5  -2  138.69   12.10
  -5   5  -2   96.29    6.50
  -5  -5  -2   98.29    7.60
   5  -5  -2   87.49    8.70
  -5  -5  -2  105.49    7.40
   5  -5  -2  100.49    7.50
   5   5  -2  103.29    7.80
   5   5   2  104.99    7.40
   5  -5   2   84.49    6.10
  -5  -5   2  115.59    8.30
   5  -5   2   96.19    6.50
  -5   5   2  105.59    7.40
  -6  -5  -2   22.60    3.80
   5  -6  -2   32.40    4.60
   5  -6  -2   22.90    5.50
   6   5  -2   31.80    4.70
   6   5  -2   25.00    3.70
  -5   6  -2   30.90    3.60
   6   5   2   26.20    3.90
  -6  -5   2   28.90    4.70
   5  -6   2   23.60    2.70
   5  -6   2   25.80    3.60
  -5   6   2   25.50    3.80
   6   5   2   25.10    4.40
  -6  -4  -2   50.39    5.30
   6   4  -2   59.29    6.10
   4  -6  -2   57.99    5.50
  -4   6  -2   51.39    4.90
   6   4  -2   66.29    5.40
  -6  -4   2   57.69    6.20
   6   4   2   62.69    6.10
   6   4   2   56.19    5.50
   4  -6   2   53.49    4.80
  -4   6   2   57.49    5.50
   4  -6   2   59.69    3.70
  -6  -3  -2  474.05   24.90
   3  -6  -2  486.45   25.00
   3  -6  -2  484.55   26.70
  -3   6  -2  461.85   24.60
   6   3  -2  500.35   25.90
   6   3  -2  489.75   25.00
   6   3   2  482.65   25.40
   3  -6   2  475.55   23.40
  -3   6   2  484.05   25.10
  -6  -3   2  478.25   25.80
   6   3   2  489.55   25.20
   3  -6   2  493.65   24.60
   2  -6  -2  118.99    7.70
   2  -6  -2   99.89   10.00
   6   2  -2  122.89    8.10
   6   2  -2  125.29    8.60
  -6  -2  -2  119.99    7.40
   6   2   2  115.99    8.30
   2  -6   2  121.39    7.60
  -6  -2   2  119.09    8.60
  -2   6   2  110.09    7.70
   6   2   2  118.99    7.80
   6   1  -2  289.67   15.90
   1  -6  -2  260.47   16.80
   1  -6  -2  261.77   14.70
  -6  -1  -2  269.17   14.40
   6   1  -2  271.67   15.30
   6   1   2  262.37   14.70
  -1   6   2  271.17   15.00
   1  -6   2  257.97   14.70
  -6  -1   2  266.67   15.50
   6   1   2  313.67   15.50
   6   0  -2  209.48   12.70
   0  -6  -2  245.38   11.90
   6   0  -2  193.58   12.50
   0  -6   2  188.28   11.90
   6   0   2  202.88   12.00
   0  -6   2  187.58   12.00
   6   0   2  195.18   11.50
   0   6   2  236.28   12.30
  -6   0   2  207.38   12.40
   6  -1  -2    3.60    2.20
   6  -1  -2    6.30    2.80
  -1  -6  -2    8.80    2.20
  -1  -6  -2    3.80    4.20
   1   6   2    9.10    2.40
  -6   1   2    2.80    2.00
   6  -1   2    7.00    1.90
  -1  -6   2    5.00    2.80
   6  -1   2    4.50    2.20
   6  -2  -2   33.80    5.10
   6  -2  -2   33.00    4.70
   6  -2   2   41.50    3.90
   6  -2   2   30.60    4.40
  -6   2   2   32.30    4.20
  -6   3  -2  122.69    7.10
  -3  -6  -2  112.39    7.80
  -3  -6  -2  108.39   11.00
   6  -3  -2  109.09    8.70
  -3  -6  -2  114.79    8.60
   6  -3  -2  127.99    9.40
   3   6  -2  129.19    7.20
  -3  -6   2  132.79    8.80
   6  -3   2  109.99    7.60
  -6   3   2  125.49    8.30
   6  -3   2  124.09    7.60
  -4  -6  -2  206.78   13.10
  -6   4  -2  225.68   12.10
   6  -4  -2  204.58   13.80
   4   6  -2  230.38   12.10
  -4  -6  -2  232.28   16.20
  -4  -6  -2  221.38   13.00
   4   6  -2  220.88   13.40
   6  -4  -2  232.08   13.70
  -4  -6   2  226.78   13.90
  -6   4   2  232.68   13.10
   6  -4   2  229.28   12.40
   6  -4   2  213.68   12.10
  -6   5  -2  264.07   14.30
   5   6  -2  251.17   15.50
  -5  -6  -2  274.17   15.20
   6  -5  -2  281.67   16.50
  -5  -6  -2  274.97   15.60
   5   6  -2  266.57   14.20
   6  -5  -2  276.07   15.70
  -5  -6  -2  264.57   18.40
  -5  -6   2  257.17   16.10
   6  -5   2  257.37   14.40
   5   6   2  250.57   15.00
   6  -5   2  255.97   13.80
  -6   5   2  267.97   15.20
   6   6  -2   26.00    3.50
  -6   6  -2   24.50    3.50
   6  -6  -2   29.00    5.30
   6  -6  -2   43.70    5.40
   6   6  -2   22.70    4.50
  -6  -6  -2   23.40    4.30
  -6  -6  -2   24.30    4.30
   6   6   2   23.30    4.50
  -6  -6   2   24.10    4.60
  -6   6   2   20.80    3.80
   6  -6   2   24.80    2.80
   6   6   2   26.80    4.20
   6  -6   2   23.30    3.40
  -6   7  -2    6.70    2.60
   7   6  -2    3.40    3.10
   6  -7  -2   -0.70    4.40
   6  -7  -2    5.30    2.80
   7   6  -2    3.30    2.50
  -7  -6  -2    6.50    2.60
   6  -7   2    2.30    2.30
   7   6   2    9.70    3.60
   6  -7   2    3.20    1.80
   7   6   2   14.30    3.30
  -7  -6   2    1.30    3.20
  -6   7   2    6.10    2.80
   7   5  -2  797.72   39.40
  -5   7  -2  757.92   39.50
  -7  -5  -2  767.12   40.20
   7   5  -2  813.82   41.10
   5  -7  -2  802.22   40.20
   5  -7  -2  845.12   41.70
   5  -7   2  807.92   39.50
  -7  -5   2  801.52   41.10
   5  -7   2  770.52   38.20
   7   5   2  760.02   40.20
  -5   7   2  782.82   40.00
   7   5   2  767.72   40.20
   4  -7  -2   76.59    9.40
   4  -7  -2   80.99    7.00
  -7  -4  -2   80.59    6.70
   7   4  -2   89.49    7.90
  -4   7  -2   77.49    6.50
   7   4   2   77.19    6.90
  -7  -4   2  103.09    8.20
   4  -7   2   87.09    5.00
   4  -7   2   80.89    6.30
  -4   7   2   89.19    7.10
   7   4   2   79.99    7.50
   7   3  -2  864.51   43.70
  -7  -3  -2  831.62   42.60
   7   3  -2  901.41   42.60
   3  -7  -2  863.01   44.30
   3  -7  -2  861.51   42.70
  -3   7  -2  822.82   42.30
   7   3   2  817.92   42.80
  -3   7   2  840.72   42.70
   7   3   2  837.82   42.90
  -7  -3   2  861.31   43.70
   3  -7   2  869.51   42.30
   7   2  -2    5.30    3.00
   7   2  -2    8.90    3.00
  -7  -2  -2   12.80    2.50
   2  -7  -2   10.30    2.50
   2  -7  -2   13.20    4.50
  -2   7   2    8.20    2.50
   7   2   2    6.60    2.60
   7   2   2    6.70    2.40
  -7  -2   2    6.90    2.70
   7   1  -2   76.29    7.10
   1  -7  -2   79.49    6.40
   7   1  -2   90.49    7.70
   1  -7  -2   86.09    9.20
  -7  -1  -2   80.99    6.10
   1  -7   2  102.99    7.00
   7   1   2   74.29    6.80
  -7  -1   2   90.69    7.20
   7   1   2   78.19    6.40
  -1   7   2   81.09    6.80
   7   0  -2    5.00    2.80
   0  -7  -2    5.70    2.30
  -7   0  -2    1.40    1.70
   0  -7  -2   -2.20    4.80
   7   0  -2    7.10    2.80
   7   0   2    1.90    2.10
   0  -7   2   12.30    3.00
   0  -7   2    7.00    2.40
  -7   0   2    5.30    2.40
   7   0   2    2.40    2.10
   0   7   2    2.70    2.40
  -7   1  -2  579.74   29.00
  -1  -7  -2  565.34   32.00
  -1  -7  -2  568.84   29.60
   7  -1  -2  570.74   30.50
   7  -1  -2  561.14   30.40
   7  -1   2  565.64   29.50
  -7   1   2  562.84   30.20
   7  -1   2  616.54   29.80
  -1  -7   2  595.54   30.00
   1   7   2  558.34   30.10
  -1  -7   2  656.53   30.50
  -2  -7  -2   75.19    8.90
   7  -2  -2   55.39    7.00
  -2  -7  -2   66.49    6.40
   7  -2  -2   59.69    6.10
  -2  -7  -2   62.69    5.70
  -7   2  -2   61.59    4.70
  -7   2   2   61.89    6.00
   2   7   2   55.39    6.30
  -2  -7   2   77.39    7.20
   7  -2   2   69.29    5.80
   7  -2   2   65.29    5.50
  -7   3  -2   -1.70    1.30
   7  -3  -2   -2.50    2.10
   7  -3  -2   -4.20    3.30
  -3  -7  -2    9.70    3.00
  -3  -7  -2   11.50    5.10
   7  -3   2    0.50    1.70
   7  -3   2   -1.50    1.60
  -7   3   2   -2.20    1.70
  -4  -7  -2   42.40    7.30
   4   7  -2   37.70    5.30
  -4  -7  -2   49.70    6.10
   7  -4  -2   24.20    5.10
   5   7  -2   10.20    3.10
   7  -5  -2    7.70    3.50
   7  -5  -2    7.90    3.90
  -7   5  -2    6.10    2.30
  -5  -7  -2   14.30    3.30
   5   7  -2    7.40    2.40
   7  -5   2    9.70    2.10
  -5  -7   2   12.20    3.90
   7  -5   2    6.80    2.60
  -7   5   2    6.00    2.70
   7  -6  -2  282.37   16.70
   7  -6  -2  288.07   17.70
  -6  -7  -2  291.97   17.00
  -7   6  -2  277.67   15.50
   7  -6   2  268.47   14.70
   6   7   2  268.07   16.60
   7  -6   2  277.77   15.70
  -7   6   2  301.67   16.50
   6   7   2  259.27   16.30
   7   7  -2  188.48   13.00
  -7  -7  -2  186.38   12.80
  -7   7  -2  188.88   11.70
   7  -7  -2  194.18   12.80
   7  -7  -2  188.18   14.00
   7   7  -2  185.78   11.40
   7   7   2  183.58   12.70
   7  -7   2  185.48   10.60
  -7   7   2  192.88   12.30
   7  -7   2  184.78   11.70
  -7  -7   2  202.08   13.70
   7   7   2  188.38   12.60
   8   7  -2  207.68   12.20
   8   7  -2  189.38   15.80
  -8  -7  -2  190.98   13.20
   7  -8  -2  189.58   13.30
  -7   8  -2  186.48   12.30
   7  -8   2  218.48   11.30
   7  -8   2  179.08   12.10
  -8  -7   2  196.78   14.20
  -7   8   2  187.28   12.80
   8   7   2  187.58   13.10
   8   7   2  182.38   13.30
   8   6  -2   84.09    7.30
   6  -8  -2   85.49    8.10
   6  -8  -2   81.89   10.50
   8   6  -2   80.89    8.30
  -6   8  -2   72.89    7.20
  -8  -6  -2   84.89    7.80
   8   6   2   77.29    8.20
   8   6   2   85.19    7.70
   6  -8   2   86.89    7.10
  -8  -6   2   86.69    8.90
   6  -8   2   92.99    6.10
  -6   8   2   77.19    7.50
   8   5  -2   77.79    7.90
   8   5  -2   77.29    6.70
   5  -8  -2   70.99    6.70
  -5   8  -2   68.19    6.40
  -8  -5  -2   71.59    6.80
  -8  -5   2   67.39    7.70
   5  -8   2   66.49    6.10
   5  -8   2   70.49    5.00
  -5   8   2   72.79    6.80
   8   5   2   69.19    7.30
   8   5   2   71.49    7.00
   4  -8  -2   50.69    5.90
   4  -8  -2   56.09    8.60
   8   4  -2   70.39    6.40
   8   4  -2   52.09    6.90
  -4   8  -2   56.89    5.70
  -8  -4  -2   57.49    5.90
   4  -8   2   64.39    5.70
  -4   8   2   49.20    5.80
  -8  -4   2   62.49    7.40
   8   4   2   48.70    5.90
   8   4   2   59.29    6.40
   4  -8   2   59.29    4.20
  -8  -3  -2  513.15   27.50
   8   3  -2  527.05   28.80
   8   3  -2  554.84   27.60
  -3   8  -2  505.15   27.40
   3  -8  -2  531.45   27.60
   3  -8  -2  549.35   29.90
   8   3   2  547.15   28.00
  -3   8   2  529.45   27.90
  -8  -3   2  528.15   28.90
   8   3   2  504.05   27.60
   3  -8   2  520.55   27.30
   8   2  -2  230.38   14.40
  -8  -2  -2  219.68   13.00
   2  -8  -2  199.98   15.70
   2  -8  -2  222.38   13.30
   8   2  -2  227.88   13.50
  -8  -2   2  230.18   14.40
   2  -8   2  229.58   13.30
  -2   8   2  215.28   13.60
   8   2   2  237.88   13.60
   8   2   2  228.58   13.60
   8   1  -2  588.64   31.60
  -8  -1  -2  612.34   30.20
   1  -8  -2  578.94   32.60
   1  -8  -2  607.84   30.50
   8   1  -2  613.04   30.80
   1  -8   2  572.84   30.40
   8   1   2  587.64   30.60
  -8  -1   2  588.14   31.30
   8   1   2  595.04   30.40
  -1   8   2  574.14   30.80
   8   0  -2   85.19    7.80
   8   0  -2   74.79    7.00
  -8   0  -2   60.29    5.30
   0  -8  -2   96.79   10.90
   8   0   2   62.69    5.90
  -8   0   2   70.59    6.80
   8   0   2   58.79    6.20
   0  -8   2   59.29    7.10
   0  -8   2   70.49    7.00
   8  -1  -2   28.70    4.90
  -8   1  -2   27.40    3.80
   8  -1  -2   31.50    4.70
   8  -1   2   23.90    3.90
  -1  -8   2   23.50    4.60
  -8   1   2   24.30    4.20
   8  -1   2   27.40    3.90
  -1  -8   2   35.80    5.70
   8  -2  -2   19.20    4.10
  -2  -8  -2    5.20    5.80
   8  -2  -2   27.40    4.80
  -2  -8  -2   20.20    4.10
  -8   2  -2   14.30    2.60
   8  -2   2   19.00    3.20
   2   8   2   16.60    4.00
   8  -2   2   20.40    3.60
  -8   2   2   11.70    3.30
  -3  -8  -2   90.79    8.40
   8  -3  -2   75.19    7.80
  -8   3  -2   91.09    6.30
  -3  -8  -2   82.29   11.50
   8  -3  -2   72.49    8.30
  -3  -8  -2  110.39    7.80
  -8   3   2   85.09    7.40
   8  -3   2   86.39    7.10
   8  -3   2   83.09    6.40
   8  -4  -2  167.58   11.90
   8  -4  -2  151.08   12.40
  -4  -8  -2  188.88   15.50
  -8   4  -2  152.78   10.10
  -4  -8  -2  165.88   11.10
  -4  -8  -2  204.48   12.70
  -8   4   2  175.18   11.30
  -4  -8   2  167.68   11.80
   8  -4   2  164.58   10.70
   8  -4   2  162.08    9.90
  -5  -8  -2    0.70    2.70
   5   8  -2    0.80    1.90
   5   8  -2    1.70    2.80
   8  -5  -2    2.90    4.10
   8  -5  -2   -0.40    2.50
  -8   5  -2   -4.00    1.70
  -5  -8  -2   -8.60    6.00
  -8   5   2    0.90    2.50
   8  -5   2    1.60    1.80
  -5  -8   2    1.50    3.30
   8  -5   2   -3.20    2.20
   6   8  -2   26.30    3.70
   6   8  -2   35.00    6.00
   8  -6  -2   32.20    5.50
  -8   6  -2   30.60    4.30
   8  -6   2   33.40    4.60
  -6  -8   2   40.30    6.80
  -8   6   2   34.70    5.00
   8  -6   2   30.30    3.70
  -8   7  -2   27.10    4.50
   8  -7  -2   38.60    5.80
   8  -7  -2   17.80    6.50
   7   8  -2   32.00    4.20
  -7  -8  -2   34.10    6.10
   8  -7   2   30.20    3.70
   7   8   2   33.30    5.90
  -7  -8   2   28.10    5.70
   7   8   2   32.00    5.40
   8  -7   2   24.20    4.60
  -8   7   2   23.20    4.60
   8  -8  -2  196.68   15.70
  -8  -8  -2  192.68   14.10
   8  -8  -2  201.78   14.20
  -8   8  -2  217.38   13.20
   8   8  -2  198.98   12.60
  -8   8   2  210.38   13.70
   8   8   2  195.98   14.00
   8   8   2  199.18   14.10
  -8  -8   2  219.38   15.20
   8  -8   2  219.58   12.20
   8  -8   2  234.38   13.40
   9   8  -2   14.50    3.80
   8  -9  -2    3.90    6.10
   8  -9  -2    3.10    5.90
  -9  -8  -2    6.50    4.30
  -8   9   2    1.80    3.60
  -9  -8   2    4.70    4.00
   9   8   2    7.60    3.70
   9   8   2   11.30    4.40
   8  -9   2    8.70    3.10
   8  -9   2    2.80    3.20
   7  -9  -2  198.48   16.00
   9   7  -2  203.98   12.80
  -7   9  -2  194.38   12.90
  -9  -7  -2  194.98   13.80
   7  -9  -2  201.58   13.80
   7  -9   2  197.08   12.80
   9   7   2  217.98   14.00
   7  -9   2  207.68   11.90
  -9  -7   2  201.38   14.80
  -7   9   2  211.08   13.70
   9   7   2  208.88   14.00
   9   6  -2  261.37   17.50
   6  -9  -2  261.17   18.30
   9   6  -2  255.87   15.40
  -6   9  -2  252.67   15.50
   6  -9  -2  258.27   16.00
  -9  -6  -2  252.27   16.00
   6  -9   2  247.58   14.10
   9   6   2  253.57   16.00
  -9  -6   2  270.37   17.30
  -6   9   2  257.47   16.00
   9   6   2  263.87   16.30
   6  -9   2  265.87   15.30
  -5   9  -2  338.47   19.90
  -9  -5  -2  332.27   20.10
   9   5  -2  345.47   21.30
   9   5  -2  411.76   20.10
   5  -9  -2  392.66   20.40
  -9  -5   2  334.77   21.20
   9   5   2  330.07   20.10
   5  -9   2  323.17   19.40
   5  -9   2  327.17   18.10
  -5   9   2  409.46   20.60
   9   5   2  335.97   20.30
  -4   9  -2  301.37   17.60
   9   4  -2  330.77   17.60
   4  -9  -2  294.27   17.70
   9   4  -2  298.47   18.80
  -9  -4  -2  312.97   17.90
   4  -9  -2  301.87   19.90
   4  -9   2  300.47   17.30
  -9  -4   2  318.87   19.20
   9   4   2  301.77   18.10
   9   4   2  304.67   17.80
  -4   9   2  308.27   18.00
   9   3  -2   44.70    6.40
  -9  -3  -2   43.80    5.30
   9   3  -2   51.19    6.00
  -9  -3   2   44.40    6.40
   9   3   2   45.00    5.90
   9   3   2   40.90    5.60
   3  -9   2   43.40    5.40
   9   2  -2    9.20    3.30
   2  -9  -2   -0.90    1.90
  -9  -2  -2    2.50    2.20
   2  -9  -2   -2.70    3.90
   9   2  -2   11.50    3.80
   9   2   2    9.10    3.30
  -9  -2   2    1.10    2.70
   9   2   2    5.60    2.60
  -2   9   2    0.00    2.70
   9   1  -2  180.98   13.10
   9   1  -2  182.98   12.20
  -9  -1  -2  195.38   11.50
   1  -9  -2  212.58   12.10
  -9  -1   2  176.48   12.50
   1  -9   2  173.68   12.00
  -1   9   2  192.68   12.60
   9   1   2  180.18   12.00
   9   1   2  191.78   12.00
   9   0  -2  169.68   12.20
   9   0  -2  189.58   13.00
  -9   0  -2  187.08   11.10
   0  -9  -2  172.28   11.60
   0  -9  -2  176.88   15.00
   0   9   2  181.08   12.40
   0  -9   2  185.18   12.40
   0  -9   2  191.48   12.20
   9   0   2  168.78   11.40
  -9   0   2  191.58   12.40
   9   0   2  180.78   11.60
   9  -1  -2  592.54   31.90
  -1  -9  -2  600.34   33.60
   9  -1  -2  594.84   31.30
  -9   1  -2  575.84   30.00
  -1  -9  -2  590.64   30.80
   9  -1   2  571.84   30.80
  -1  -9   2  616.64   31.70
   1   9   2  582.94   31.60
  -9   1   2  605.44   31.60
  -1  -9   2  602.34   31.40
   9  -1   2  577.44   30.30
   9  -2  -2   60.99    6.90
  -2  -9  -2   68.69    6.60
  -2  -9  -2   55.59    8.60
  -9   2  -2   59.99    5.40
  -2  -9  -2   67.39    7.80
   9  -2  -2   55.49    6.80
   9  -2   2   56.49    6.20
   9  -2   2   53.29    5.80
  -2  -9   2   81.79    9.50
   9  -3  -2   56.19    7.10
  -3  -9  -2   63.99    7.50
   9  -3  -2   47.20    6.40
  -3  -9  -2   56.49    8.90
  -3  -9  -2   46.90    6.60
  -9   3  -2   43.50    4.80
   9  -3   2   46.30    5.80
  -3  -9   2   57.89    8.20
  -9   3   2   41.50    5.70
   9  -3   2   41.80    5.10
   9  -4  -2   27.10    5.30
  -9   4  -2   21.40    3.50
  -4  -9  -2   31.60    6.10
   9  -4  -2   36.70    6.00
  -4  -9  -2   31.10    7.80
  -9   4   2   23.90    4.40
   9  -4   2   23.20    4.30
   9  -4   2   27.90    3.70
  -4  -9   2   26.70    5.30
  -5  -9  -2  508.25   28.20
  -5  -9  -2  485.85   30.80
   9  -5  -2  500.55   28.60
  -9   5  -2  516.55   26.40
   5   9  -2  439.16   25.30
   9  -5  -2  510.55   28.30
   9  -5   2  559.94   26.00
  -9   5   2  505.75   27.50
  -5  -9   2  517.35   28.60
   9  -5   2  522.65   27.10
   9  -6  -2   61.89    7.90
  -6  -9  -2   56.19    7.80
  -9   6  -2   48.60    5.80
   9  -6  -2   81.59   10.50
   9  -6   2   58.79    5.50
  -9   6   2   56.89    6.70
   9  -6   2   55.19    6.50
   7   9  -2   79.69    7.40
   9  -7  -2  109.09    9.70
  -9   7  -2   97.99    7.90
  -7  -9  -2  117.79   10.50
  -9   7   2  109.09    9.00
  -7  -9   2  106.59   11.10
   9  -7   2   95.39    8.50
   9  -7   2   97.69    7.30
   7   9   2   94.89    9.60
   8   9  -2  289.87   17.70
   9  -8  -2  310.67   21.10
  -8  -9  -2  342.77   21.30
   9  -8  -2  306.27   20.90
  -9   8   2  344.47   19.60
   9  -8   2  328.27   17.60
   8   9   2  386.26   20.20
  -8  -9   2  303.07   20.60
   9  -8   2  309.07   18.70
   8   9   2  313.87   19.40
   9  -9  -2    6.00    4.90
   9   9  -2    3.90    3.10
  -9  -9   2    1.30    3.80
  -9   9   2    2.30    3.30
   9   9   2    2.50    3.90
   9  -9   2    2.20    2.80
   9 -10  -2    5.70    5.80
  10   9  -2    7.90    3.50
  -9  10   2    4.40    3.80
 -10  -9   2    6.30    4.30
   9 -10   2    5.10    3.10
  10   8  -2  156.28   11.30
   8 -10  -2  149.59   14.70
   8 -10   2  181.78   10.70
  -8  10   2  153.38   11.90
  10   8   2  155.58   12.30
 -10  -8   2  142.79   13.00
  10   7  -2    0.80    3.30
   7 -10  -2   10.50    6.20
  -7  10   2    6.10    3.60
   7 -10   2    3.20    2.70
   7 -10   2   -4.40    2.60
  10   7   2    0.00    3.00
  10   7   2    9.30    4.30
 -10  -7   2    0.20    3.70
   6 -10  -2   44.50    9.30
  -6  10  -2   44.40    6.10
 -10  -6  -2   40.80    5.90
   6 -10  -2   47.60    8.40
  10   6  -2   47.90    6.40
   6 -10   2   45.80    5.40
 -10  -6   2   49.60    7.50
  10   6   2   37.40    5.90
  -6  10   2   51.29    6.80
   6 -10   2   45.70    5.80
  10   6   2   43.20    6.40
  10   5  -2   30.70    6.70
  10   5  -2   29.90    5.00
   5 -10  -2   28.50    4.70
  -5  10  -2   26.10    4.80
 -10  -5  -2   25.30    4.70
   5 -10  -2   26.30    7.00
   5 -10   2   27.30    4.40
  10   5   2   23.20    4.90
  10   5   2   21.60    4.80
  -5  10   2   26.10    5.20
 -10  -5   2   26.40    5.90
   4 -10  -2  154.78   14.90
 -10  -4  -2  159.38   11.20
  10   4  -2  154.18   12.40
  10   4  -2  161.68   11.40
  -4  10  -2  159.88   11.20
   4 -10  -2  161.38   11.30
  10   4   2  168.28   11.80
  -4  10   2  155.88   11.70
 -10  -4   2  163.98   13.20
   4 -10   2  156.58   10.80
  10   4   2  158.18   11.50
  10   3  -2   29.30    5.00
 -10  -3  -2   28.00    4.60
   3 -10  -2   45.60    6.00
  10   3  -2   21.20    5.20
  10   3   2   32.80    5.20
 -10  -3   2   26.70    5.60
  10   3   2   29.40    4.90
   3 -10   2   29.50    5.10
  10   2  -2  479.25   25.90
   2 -10  -2  490.95   28.50
   2 -10  -2  446.06   25.60
 -10  -2  -2  470.65   25.60
  10   2  -2  550.64   27.70
  -2  10   2  456.95   26.20
  10   2   2  473.15   26.20
  10   2   2  444.76   25.40
   2 -10   2  480.15   25.80
 -10  -2   2  493.65   27.10
  10   1  -2    6.50    3.70
  10   1  -2   10.70    4.10
   1 -10  -2   16.10    3.50
 -10  -1  -2    8.20    2.80
   1 -10   2   10.60    3.80
  10   1   2   10.60    3.60
 -10  -1   2    9.40    3.90
  10   1   2   10.50    3.70
  10   0  -2   53.29    6.60
  10   0  -2   62.29    7.80
 -10   0  -2   51.29    5.60
 -10   0   2   52.09    6.80
   0 -10   2   72.29    7.70
  10   0   2   51.39    6.40
  10   0   2   49.90    6.20
   0 -10   2   49.99    6.60
  10  -1  -2   92.59    9.30
 -10   1  -2  100.29    7.50
  10  -1  -2  105.39   10.00
  10  -1   2   99.09    8.50
 -10   1   2   98.59    8.90
  10  -1   2   91.99    7.90
  10  -2  -2  112.59   11.20
  -2 -10  -2  115.29   14.50
  10  -2  -2  132.49   11.20
  -2 -10  -2  147.29   11.80
 -10   2  -2  147.59    9.50
 -10   2   2  138.09   10.90
  -2 -10   2  163.18   12.10
  10  -2   2  146.69   10.50
  -2 -10   2  166.08   13.50
  10  -2   2  151.68    9.80
  -3 -10  -2  542.65   30.60
  -3 -10  -2  561.64   33.30
 -10   3  -2  553.34   28.70
  10  -3  -2  548.35   30.70
  10  -3  -2  566.64   30.90
  -3 -10   2  544.65   31.00
  -3 -10   2  542.25   30.50
 -10   3   2  556.04   30.10
  10  -3   2  564.14   28.60
  10  -3   2  575.04   29.80
 -10   4  -2   61.79    6.00
  -4 -10  -2   64.19   11.00
  -4 -10  -2   84.19   10.60
  10  -4  -2   61.39    8.00
  10  -4  -2   64.69    8.60
  10  -4   2   53.99    7.10
  -4 -10   2   67.19    9.20
  10  -4   2   63.09    6.10
 -10   4   2   54.79    7.00
  -5 -10  -2   49.70   10.20
  10  -5  -2   41.00    7.10
  -5 -10  -2   36.60    6.30
 -10   5  -2   43.00    5.30
  10  -5  -2   32.80    5.90
  10  -5   2   38.70    5.40
  -5 -10   2   32.60    6.20
  10  -5   2   36.20    5.10
 -10   5   2   37.10    5.30
  10  -6  -2   34.80    6.00
 -10   6  -2   32.20    4.80
  10  -6  -2   52.29    7.90
  -6 -10  -2   43.10    6.90
   6  10  -2   23.90    3.70
  10  -6   2   31.10    4.20
 -10   6   2   40.40    6.20
  10  -6   2   31.70    5.20
  -6 -10   2   54.99    7.80
  10  -7  -2  260.07   17.30
  10  -7  -2  250.27   18.00
   7  10  -2  212.08   13.70
 -10   7   2  258.47   16.00
  10  -7   2  235.68   14.00
  -7 -10   2  254.27   17.80
  10  -7   2  247.88   15.60
   8  10  -2   -1.00    2.60
  10  -8  -2    2.60    5.10
 -10   8   2   -0.40    2.70
   8  10   2   -1.90    4.10
  -8 -10   2    3.40    3.90
  10  -8   2   -2.80    2.60
  10  -9  -2  167.08   14.90
   9  10  -2  158.38   11.10
 -10   9   2  178.78   12.80
   9  10   2  185.48   13.30
  10  -9   2  164.58   11.20
  -9 -10   2  174.08   14.10
  10  10  -2   12.20    3.60
  10 -10  -2    5.40    5.60
  10 -10   2    7.50    3.50
 -10 -10   2    7.60    4.50
  10  10   2    9.50    4.80
 -10  10   2    6.30    3.80
  10 -11  -2    4.10    6.40
  11  10  -2    3.50    3.80
  10 -11   2    9.50    3.90
 -10  11   2    7.40    4.10
  11  10   2    7.30    4.60
 -11 -10   2    8.00    4.70
  11   9  -2    6.70    3.80
   9 -11  -2   -2.20    5.30
   9 -11   2    0.30    3.20
  -9  11   2   -1.10    3.20
 -11  -9   2    3.40    3.80
  11   9   2    5.60    3.90
  11   8  -2   -2.30    3.40
   8 -11  -2    5.00    5.70
 -11  -8   2    2.00    3.90
   8 -11   2    4.00    3.00
  -8  11   2    1.60    3.20
  11   8   2   10.20    4.10
   7 -11  -2   58.09   10.00
  11   7  -2   96.29    8.60
   7 -11   2   75.09    7.00
  11   7   2   90.69    9.10
 -11  -7   2   95.09   10.30
  -7  11   2   73.89    8.60
   6 -11  -2  291.77   21.50
  11   6  -2  310.47   18.40
   6 -11   2  303.57   17.00
  11   6   2  309.87   18.90
  -6  11   2  313.97   19.10
 -11  -6   2  321.17   20.60
  11   5  -2  145.19   10.80
   5 -11  -2   96.79   13.80
  11   5   2  138.39   11.20
   5 -11   2  125.09   10.00
 -11  -5   2  128.09   12.50
  11   5   2  138.29   11.20
  -5  11   2  122.79   11.00
  -4  11  -2  347.97   20.30
 -11  -4  -2  348.27   20.30
   4 -11  -2  336.17   22.60
  11   4  -2  366.96   20.20
 -11  -4   2  350.06   21.70
  11   4   2  342.47   20.10
  -4  11   2  365.26   20.90
  11   4   2  344.27   20.80
   4 -11   2  321.17   19.70
   3 -11  -2  200.98   16.10
 -11  -3  -2  199.78   13.10
  11   3  -2  189.58   14.30
  11   3  -2  197.38   13.30
 -11  -3   2  196.58   14.20
  11   3   2  191.88   13.60
  -3  11   2  195.78   13.80
  11   3   2  196.38   13.10
   3 -11   2  201.48   13.30
  11   2  -2   61.69    8.20
  11   2  -2   58.69    7.60
 -11  -2  -2   65.49    6.70
   2 -11  -2   62.99    9.50
 -11  -2   2   57.99    7.80
  -2  11   2   67.89    8.30
  11   1  -2    4.90    3.80
  11   1  -2   11.60    4.20
   1 -11  -2   -1.20    6.50
 -11  -1  -2   12.50    3.10
  -1  11   2    7.60    4.10
   1 -11   2   14.50    4.20
  11   1   2   10.50    3.60
 -11  -1   2    7.80    3.80
  11   1   2   16.10    3.70
 -11   0  -2  448.06   24.60
   0 -11  -2  439.66   28.20
  11   0  -2  457.95   26.70
  11   0  -2  412.26   25.50
   0 -11   2  469.55   26.00
   0 -11   2  506.45   25.80
 -11   0   2  472.65   26.30
   0  11   2  497.15   26.50
  11   0   2  431.46   25.40
  11   0   2  465.85   24.80
 -11   1  -2   17.50    3.40
  -1 -11  -2   27.90    6.00
  -1 -11  -2   24.90    7.70
  11  -1  -2   11.70    4.80
  11  -1  -2   22.80    5.30
  11  -1   2   21.30    4.20
  11  -1   2   21.70    4.40
  -1 -11   2   23.70    5.00
 -11   1   2   26.30    5.10
   1  11   2   21.90    5.30
  -1 -11   2   33.50    6.50
  11  -2  -2   32.50    6.20
  -2 -11  -2   51.19    7.20
 -11   2  -2   35.40    4.60
  -2 -11  -2   35.00    8.70
  11  -2  -2   37.90    6.10
  11  -2   2   37.30    4.80
 -11   2   2   37.10    5.70
  -2 -11   2   43.20    7.20
  -2 -11   2   39.70    7.80
  11  -2   2   38.40    5.60
  11  -4  -2  108.19   10.50
  11  -4  -2   98.59   11.10
  -4 -11  -2   99.89   12.60
  -4 -11  -2  108.89   15.00
 -11   4  -2  114.29    8.60
  -4 -11   2  140.29   12.00
  11  -4   2  113.39   10.00
 -11   4   2  120.59   10.10
  11  -4   2  124.89    8.70
  -5 -11  -2  383.46   24.50
  11  -5  -2  383.56   24.00
  11  -5  -2  371.86   23.80
  -5 -11  -2  489.25   27.80
  -5 -11   2  378.46   24.00
 -11   5   2  404.46   23.00
  11  -5   2  402.36   21.20
  11  -5   2  384.06   22.90
  11  -6  -2  134.09   12.60
  11  -6   2  101.39   10.20
   6  11   2   97.89   10.90
  -6 -11   2  135.59   12.60
  11  -6   2  112.19    8.40
 -11   6   2  108.69    9.90
  11  -7  -2  288.87   19.80
  -7 -11   2  299.17   19.90
 -11   7   2  282.67   17.80
   7  11   2  281.07   18.40
  11  -7   2  278.47   16.20
   8  11  -2    2.60    2.80
 -11   8   2   10.30    3.80
  11  -8   2    3.80    3.10
   8  11   2   17.00    5.40
  -8 -11   2    9.60    5.20
  11  -9  -2   34.10    7.90
   9  11  -2   45.10    6.30
   9  11   2   39.70    6.90
  11  -9   2   42.60    5.60
 -11   9   2   33.90    6.00
  -9 -11   2   39.70    7.50
  10  11  -2   12.30    3.80
  11 -10  -2    9.00    6.30
 -11  10   2   11.90    4.30
  10  11   2   17.20    5.60
 -10 -11   2   13.30    5.10
  11 -10   2   12.30    4.00
  11 -11  -2  140.89   15.40
  11  11  -2  179.88   12.10
  11 -11   2  147.79   12.10
  11  11   2  170.98   13.30
 -11 -11   2  170.68   14.70
  11 -12  -2   48.90    9.40
  12  11  -2   32.10    5.60
 -12 -11   2   33.40    7.50
  12  11   2   33.80    6.90
  11 -12   2   29.60    5.80
  12  10  -2   33.40    5.70
  10 -12  -2   43.10    9.20
  10 -12   2   26.20    5.40
 -12 -10   2   26.10    6.40
  12   9  -2  162.38   12.30
   9 -12  -2  169.98   16.20
  12   9   2  182.58   13.60
  -9  12   2  164.98   13.20
 -12  -9   2  170.58   14.40
  12   8  -2    2.90    3.90
   8 -12  -2   -0.30    5.80
  -8  12   2   -1.50    3.20
  12   8   2    1.20    4.00
   8 -12   2    1.60    4.80
 -12  -8   2    0.70    3.70
  12   7  -2   25.30    5.20
   7 -12  -2   21.00    7.50
  12   7   2   28.30    5.60
 -12  -7   2   17.60    5.40
  -7  12   2   25.50    5.30
  12   6  -2   20.30    4.80
   6 -12  -2   16.20    7.10
 -12  -6   2   16.20    5.70
  12   6   2   12.10    4.80
  -6  12   2   23.50    5.50
  12   5  -2   38.50    6.20
   5 -12  -2   44.30    8.40
  12   5   2   36.40    6.40
 -12  -5   2   51.09    7.70
  -5  12   2   39.30    6.20
   4 -12  -2   -2.50    5.30
  12   4  -2    2.10    3.70
  -4  12   2   -0.10    3.10
  12   4   2   -1.10    3.70
 -12  -4   2   -0.10    3.60
  12   3  -2   97.69    9.70
   3 -12  -2   96.99   12.30
   3 -12   2  100.89   10.30
  -3  12   2   94.29    9.60
  12   3   2   93.49    9.40
  12   3   2   89.79    9.00
 -12  -3   2   90.99   10.00
  12   2  -2   16.00    5.60
  12   2   2   32.60    5.10
  12   2   2   33.60    5.90
   2 -12   2   27.80    5.30
 -12  -2   2   23.70    5.70
  -2  12   2   29.40    5.80
   1 -12  -2  188.78   16.90
  12   1  -2  192.48   16.30
  12   1  -2  199.98   13.80
  -1  12   2  185.38   14.90
 -12  -1   2  211.98   14.60
  12   1   2  203.18   12.90
   1 -12   2  193.28   13.50
  12   1   2  205.18   13.90
   1 -12   2  181.98   13.90
  12   0  -2   51.29    7.20
   0 -12  -2   80.29   10.80
  12   0  -2   54.49    7.90
  12   0   2   61.79    7.60
   0  12   2   67.69    8.70
   0 -12   2   49.60    7.10
 -12   0   2   46.00    7.00
   0 -12   2   49.60    7.30
  12   0   2   70.29    7.10
  -1 -12  -2   77.09   11.40
  12  -1  -2   78.19    9.80
  12  -1  -2   71.59    8.60
 -12   1   2   55.79    8.30
  12  -1   2   69.39    8.00
  12  -1   2   69.59    7.20
   1  12   2   64.69    8.70
  -1 -12   2   89.69    9.90
  -2 -12  -2  423.36   24.20
  -2 -12  -2  371.06   26.30
  12  -2  -2  368.56   24.10
  12  -2  -2  369.96   23.20
  12  -2   2  380.86   22.90
 -12   2   2  388.56   23.30
  12  -2   2  388.66   21.60
  -2 -12   2  468.25   24.30
  12  -3  -2    0.80    4.50
  12  -3  -2    3.00    4.70
  -3 -12  -2    2.00    4.60
  -3 -12   2    3.70    6.10
  -3 -12   2    8.70    6.10
  12  -3   2    3.40    3.00
 -12   3   2    2.00    3.40
  12  -3   2    0.30    3.40
  12  -4  -2   84.49   10.30
  -4 -12  -2   78.19   12.40
 -12   4   2   67.69    8.40
  12  -4   2   76.99    7.30
  -4 -12   2  101.19   11.50
  12  -5  -2   -5.30    4.90
  -5 -12  -2    0.10    7.60
 -12   5   2   -2.30    2.80
  12  -5   2    3.50    2.90
  -5 -12   2   -2.50    3.50
  12  -6  -2  125.99   12.50
  12  -6   2  112.59    8.90
   6  12   2  118.69   11.20
  -6 -12   2  112.09   11.80
 -12   6   2  115.59   10.10
  12  -7  -2   56.69    9.10
  -7 -12   2   83.99   11.60
  12  -7   2   62.39    6.80
 -12   7   2   51.39    7.40
   7  12   2   59.29    8.20
  12  -8  -2  198.88   16.20
  12  -8   2  178.28   12.00
   8  12   2  183.88   14.10
 -12   8   2  159.08   12.90
  -8 -12   2  191.58   15.80
  12  -9  -2   73.09   10.60
  -9 -12   2   80.49   10.60
   9  12   2   94.29    9.80
 -12   9   2   82.49    9.90
  12  -9   2   76.79    8.20
  12 -10  -2   -2.00    5.80
  10  12   2   18.60    5.60
  12 -10   2    6.90    3.80
 -10 -12   2    1.80    4.60
  12 -11  -2   -1.20    6.50
  12 -11   2    0.60    4.30
  11  12   2    8.20    5.30
 -11 -12   2    7.40    5.10
  12 -12  -2   -3.50    6.50
  12  12   2   -1.30    4.50
  12 -12   2    2.20    4.20
  12 -13  -2   70.49   12.30
  13  12   2   87.59   10.80
  11 -13  -2    7.60    6.80
  13  11  -2    2.10    4.40
  13  11   2    4.70    5.40
  13  10  -2    5.80    4.10
  10 -13  -2   -0.20    6.30
  13  10   2    1.10    4.90
  13   9  -2    6.20    4.50
   9 -13  -2    0.00    6.60
 -13  -9   2    6.50    4.50
  13   9   2    2.20    4.90
  13   8  -2    5.60    4.20
   8 -13  -2    4.00    6.60
 -13  -8   2    8.10    4.60
  -8  13   2   11.20    4.70
  13   8   2   13.30    5.00
  13   7  -2  280.97   16.50
   7 -13  -2  232.48   19.20
  -7  13   2  238.48   16.90
 -13  -7   2  229.68   18.00
  13   7   2  237.28   16.40
  13   6  -2   23.50    5.00
   6 -13  -2   -3.60    6.10
  -6  13   2    5.80    4.10
  13   6   2    8.60    4.40
 -13  -6   2   11.00    5.20
  13   5  -2  204.78   14.40
   5 -13  -2  182.28   16.90
  13   5   2  205.48   14.30
  -5  13   2  204.38   14.80
 -13  -5   2  231.28   16.10
   4 -13  -2    2.60    5.60
  13   4  -2    4.10    4.00
  -4  13   2    2.60    3.30
 -13  -4   2    4.30    3.90
  13   4   2    3.60    3.50
   3 -13  -2   -7.90    5.00
  13   3  -2   -1.20    3.80
  13   3   2   -2.00    3.30
 -13  -3   2    0.10    3.20
  -3  13   2    1.20    3.70
  13   2  -2    1.80    3.90
   2 -13  -2    5.60    6.10
  -2  13   2   -0.90    3.70
 -13  -2   2    2.80    3.60
  13   2   2   -2.70    3.00
   1 -13  -2  191.28   16.50
  13   1  -2  163.18   12.90
  13   1   2  171.78   12.00
  -1  13   2  165.78   13.90
 -13  -1   2  162.58   13.20
   1 -13   2  164.08   13.20
   0 -13  -2  121.39   14.30
  13   0  -2  102.29   10.50
   0  13   2  126.79   12.00
  13   0   2  114.99    9.20
   0 -13   2  105.99   10.50
 -13   0   2  111.59   10.60
  13  -1  -2  145.09   12.80
  -1 -13  -2  178.38   16.70
 -13   1   2  160.88   12.80
  -1 -13   2  165.88   14.20
  13  -1   2  166.88   11.30
  -2 -13  -2   29.60    8.40
  13  -2  -2    7.80    4.60
  -2 -13   2   11.60    6.30
  13  -2   2   10.70    3.60
 -13   2   2    8.00    4.10
  -3 -13  -2   21.70    8.70
  13  -3  -2   25.20    6.10
  -3 -13   2   39.00    8.60
 -13   3   2   22.40    5.00
  13  -3   2   28.20    4.60
  -4 -13  -2  252.27   20.10
  13  -4  -2  238.18   17.20
  -4 -13   2  219.18   17.70
  13  -4   2  236.08   14.30
 -13   4   2  231.58   15.80
  13  -5  -2   71.59    9.80
  -5 -13  -2   81.49   13.00
 -13   5   2   58.69    8.00
  13  -5   2   81.39    7.60
  -5 -13   2   74.39   10.20
  13  -6  -2  297.67   21.10
 -13   6   2  306.27   19.60
   6  13   2  319.07   20.20
  -6 -13   2  345.47   21.80
  13  -6   2  313.97   18.20
  13  -7  -2    4.30    5.70
  -7 -13   2    7.10    6.40
  13  -7   2    6.00    3.30
   7  13   2    8.10    5.00
 -13   7   2    4.10    3.60
  13  -8  -2   -9.30    4.90
  -8 -13   2    2.10    4.80
   8  13   2    6.80    5.20
  13  -8   2    0.60    3.20
  13  -9  -2   31.00    8.30
  13  -9   2   39.40    5.90
   9  13   2   51.49    7.70
  -9 -13   2   39.70    8.30
  13 -10  -2  127.69   15.10
 -10 -13   2  118.19   13.40
  10  13   2  146.79   12.90
  13 -10   2  137.79   11.30
  13 -11  -2   16.60    7.70
  11  13   2   27.10    6.70
  13 -11   2   22.10    5.60
  13 -12  -2    3.00    6.90
  12  13   2   16.50    5.80
  13 -12   2    7.10    5.10
  13 -13  -2    4.40    7.80
  13  13   2   13.00    6.10
  13 -14  -2   29.60   10.10
  14  13   2   42.40    8.30
  12 -14  -2   -8.40    7.00
  14  12   2   -2.80    5.20
  14  11  -2    6.50    5.00
  11 -14  -2    4.00    7.10
  14  11   2   -0.90    5.10
  10 -14  -2   65.09   11.70
  14  10  -2   61.69    8.10
  14  10   2   70.79    9.50
  14   9  -2   -0.20    4.20
   9 -14  -2   -6.60    6.50
  14   9   2    1.00    5.00
  14   8  -2   31.50    6.10
   8 -14  -2   21.80    7.80
  14   8   2   25.60    6.20
  14   7  -2    3.30    4.30
   7 -14  -2    3.70    6.60
  14   7   2    2.70    4.20
 -14  -7   2    3.70    4.80
   6 -14  -2   13.00    6.90
  14   6  -2   30.70    5.70
  14   6   2   23.00    5.30
  -6  14   2   11.90    5.10
 -14  -6   2   10.00    4.80
  14   5  -2   59.49    7.70
   5 -14  -2   57.79    9.50
 -14  -5   2   57.39    8.60
  -5  14   2   47.60    7.70
  14   5   2   56.49    7.40
   4 -14  -2   90.29   11.70
  14   4  -2   88.09    9.90
  14   4   2   88.39    9.30
  -4  14   2   89.09   10.30
 -14  -4   2   88.99   10.30
   3 -14  -2  126.39   14.30
  14   3  -2  130.39   11.60
  14   3   2  143.89   11.00
 -14  -3   2  130.39   12.30
  -3  14   2  135.79   12.30
   2 -14  -2   38.70    8.60
  14   2  -2   37.40    6.60
 -14  -2   2   29.00    6.30
  14   2   2   35.60    5.60
  -2  14   2   36.00    7.40
  14   1  -2    7.80    4.50
   1 -14  -2    8.00    6.80
  -1  14   2    5.10    4.90
 -14  -1   2    3.60    4.00
   1 -14   2    0.90    3.80
  14   1   2    9.70    3.60
  14   0  -2   -0.10    3.90
   0 -14  -2   -1.20    6.00
   0 -14   2    0.10    3.50
   0  14   2    0.70    3.90
 -14   0   2   -2.10    3.10
  14   0   2    0.90    3.00
  -1 -14  -2  117.29   14.50
  14  -1  -2   93.99   10.50
  -1 -14   2   91.29   12.00
 -14   1   2  111.09   10.60
  14  -1   2  101.99    8.70
  14  -2  -2    3.90    4.60
  -2 -14  -2    8.60    7.30
  -2 -14   2    5.20    6.40
 -14   2   2    1.10    3.40
  14  -2   2    3.20    3.00
  -3 -14  -2  161.18   17.10
  14  -3  -2  206.78   14.60
  14  -3   2  147.09   11.40
 -14   3   2  154.88   12.70
  14  -4  -2   -7.70    5.00
 -14   4   2   -0.50    3.20
  -4 -14   2    6.60    5.50
  14  -4   2   -1.30    3.10
  14  -5  -2   14.40    5.90
  -5 -14  -2   26.10    9.10
  -5 -14   2    5.30    4.40
 -14   5   2    2.00    3.50
  14  -5   2   -4.20    3.40
  14  -6  -2   38.10    8.10
  14  -6   2   40.70    5.80
  -6 -14   2   37.70    7.50
  14  -7  -2   47.80    9.00
  -7 -14   2   53.39   10.20
   7  14   2   63.39    9.40
  14  -7   2   55.19    7.50
  14  -8  -2   43.30    8.90
   8  14   2   40.20    8.30
  -8 -14   2   48.90    9.10
  14  -8   2   37.30    6.10
  14  -9  -2    8.20    6.60
  14  -9   2    9.50    4.10
   9  14   2    4.70    4.90
  -9 -14   2   12.30    6.20
  14 -10  -2    6.90    6.70
  14 -10   2   14.00    4.90
  10  14   2   19.00    6.70
  14 -11  -2   27.10    8.90
  11  14   2   35.40    7.50
  14 -11   2   29.80    6.40
  14 -12  -2   76.19   12.30
  14 -12   2   74.39   10.80
  12  14   2   93.49   11.40
  14 -13  -2   70.89   12.70
  13  14   2   71.09   10.40
  14 -14  -2   25.50    9.70
  14  14   2   30.40    8.10
  14 -15  -2    6.90    8.50
  15  14   2   -6.10    5.50
  13 -15  -2   22.80    9.90
  15  13   2   36.10    8.00
  12 -15  -2   26.90    9.80
  15  12   2   35.30    7.70
  11 -15  -2   44.10   10.80
  15  11  -2   40.10    7.70
  15  11   2   51.99    8.40
  10 -15  -2   13.80    8.30
  15  10  -2    9.80    5.30
  15  10   2    8.50    5.50
   9 -15  -2    6.60    7.80
  15   9  -2    8.30    5.40
  15   9   2   10.20    5.60
   8 -15  -2  128.89   16.10
  15   8  -2  131.69   12.20
  15   8   2  130.49   12.30
   7 -15  -2   28.30    8.80
  15   7  -2   31.90    6.60
  15   6  -2   86.19   10.20
   6 -15  -2   69.59   11.30
  15   6   2   82.39    9.50
   5 -15  -2  -13.80    6.10
  15   5  -2    1.70    4.40
  -5  15   2   -1.80    4.00
  15   5   2   -2.50    3.80
   4 -15  -2  -13.10    5.60
  15   4  -2   -3.10    4.20
  -4  15   2   -3.70    4.10
  15   4   2    2.40    3.60
   3 -15  -2  -11.40    5.30
  15   3  -2   -1.90    4.30
  15   3   2    2.10    3.40
  -3  15   2    0.80    4.40
 -15  -3   2   -1.30    4.50
   2 -15  -2   63.79   11.30
  15   2  -2   70.29    9.90
  15   2   2   70.79    8.20
  -2  15   2   84.29   11.30
 -15  -2   2   72.79    9.50
   2 -15   2   67.59    9.70
  15   1  -2   42.90    7.40
   1 -15  -2   48.90   10.00
 -15  -1   2   56.29    8.60
  15   1   2   47.00    6.60
   1 -15   2   42.90    7.50
  -1  15   2   42.40    7.80
  15   0  -2    5.30    4.60
   0 -15  -2   -0.40    7.50
  15   0   2    3.10    3.30
 -15   0   2    3.60    4.00
   0 -15   2    0.20    5.30
  15  -1  -2   42.00    7.40
  -1 -15   2   50.79    9.10
  15  -1   2   38.40    5.90
 -15   1   2   49.20    9.20
  15  -2  -2    6.60    5.20
  -2 -15  -2    6.50    7.90
  -2 -15   2   31.60    9.40
  15  -2   2    4.60    3.50
  -3 -15  -2  118.29   15.70
  15  -3  -2   93.29   11.50
  15  -3   2  100.69    9.20
  -3 -15   2   97.29   13.50
  -4 -15  -2   26.20    9.10
  15  -4  -2   31.50    7.30
  -4 -15   2   30.60    8.60
  15  -4   2   30.30    5.30
  15  -5  -2  506.35   30.00
  -5 -15   2  463.75   30.00
  15  -5   2  498.45   26.90
  15  -6  -2   39.70    8.30
  15  -6   2   28.70    5.60
  -6 -15   2   34.50    7.40
   6  15   2   43.70    7.80
  15  -7  -2   42.10    8.80
  15  -7   2   23.70    5.40
   7  15   2   28.80    7.90
  -7 -15   2   36.90    8.70
  15  -8  -2    3.60    6.50
  15  -8   2    8.30    4.40
   8  15   2    5.40    5.50
  -8 -15   2    5.30    5.60
  15  -9  -2   94.19   13.10
   9  15   2  104.59   11.90
  15  -9   2  132.99   11.10
  15 -10  -2   50.99   11.00
  10  15   2   61.59    9.90
  15 -10   2   59.09    8.20
  15 -11  -2   18.70    8.70
  15 -11   2   23.10    6.20
  11  15   2   14.90    6.20
  15 -12  -2    2.70    8.00
  12  15   2    8.80    6.40
  15 -13  -2   -7.70    7.20
  13  15   2   16.40    7.30
  15 -14  -2   17.90    9.60
  14  15   2   22.70    7.70
  15 -15  -2   -0.50    8.80
  15  15   2   -1.70    5.80
  15 -16  -2   33.40   11.90
  16  15   2   40.70    8.10
  14 -16  -2    7.30    9.10
  16  14   2   -2.50    5.30
  13 -16  -2   -0.50    7.90
  16  13   2    1.30    5.10
  12 -16  -2   -4.80    7.40
  16  12   2    4.80    5.00
  16  11  -2   31.90    7.20
  11 -16  -2   35.50   10.60
  16  11   2   39.00    7.20
  16  10  -2   12.60    5.70
  10 -16  -2   10.80    8.00
  16  10   2    4.70    4.90
   9 -16  -2   35.50   10.30
  16   9  -2   44.10    7.80
  16   9   2   51.29    7.90
   8 -16  -2    5.00    8.00
  16   8  -2   14.00    5.70
  16   8   2   14.10    5.30
   7 -16  -2   -6.20    6.60
  16   7  -2   -4.40    4.80
  16   7   2   24.80    5.80
  16   6  -2    1.40    4.60
   6 -16  -2    9.90    6.90
  16   6   2    2.40    4.10
  16   5  -2   25.90    6.30
   5 -16  -2   14.10    7.50
  16   5   2   11.90    4.80
   4 -16  -2    6.40    7.80
  16   4  -2   16.20    5.90
  16   4   2   15.90    4.80
  16   3  -2    3.50    5.10
   3 -16  -2   -0.60    6.10
  16   3   2    6.60    4.30
  16   2  -2   -2.80    4.40
   2 -16  -2   -2.20    6.50
   2 -16   2   -5.00    3.70
  16   2   2    3.00    3.80
  -2  16   2   -1.60    5.00
  16   1  -2   34.10    7.10
   1 -16  -2   42.50    9.70
  16   1   2   32.90    5.80
   1 -16   2   28.40    6.70
  -1  16   2   37.90    7.90
   0 -16  -2   77.19   12.90
  16   0  -2   71.69    9.90
   0 -16   2  108.69   13.20
  16   0   2   79.09    8.70
  -1 -16  -2   80.19   12.70
  16  -1  -2   82.79   11.00
  16  -1   2   76.59    8.70
  -1 -16   2   92.69   12.80
  -2 -16  -2   85.29   13.20
  16  -2  -2   79.89   10.50
  -2 -16   2  114.69   16.00
  16  -2   2   91.59    9.20
  16  -3  -2   41.30    8.30
  -3 -16  -2   37.60    9.90
  -3 -16   2   51.89    9.80
  16  -3   2   40.80    6.30
  16  -4  -2   -3.80    5.50
  -4 -16  -2   -3.00    7.70
  16  -4   2   17.00    4.70
  -4 -16   2   -2.00    5.40
  16  -5  -2   -2.10    6.20
  16  -5   2    1.10    4.10
  -5 -16   2    2.50    4.90
   5  16   2    4.60    5.40
  16  -6  -2   14.20    7.10
  16  -6   2   13.70    4.80
  -6 -16   2   16.40    6.20
   6  16   2   31.20    7.00
  16  -7  -2  121.19   14.90
   7  16   2  126.29   12.90
  -7 -16   2  167.98   16.10
  16  -7   2  102.29   11.20
  16  -8  -2   23.40    8.50
  16  -8   2   27.80    6.00
   8  16   2   36.40    7.40
  16  -9  -2   42.10   10.00
  16  -9   2   40.80    7.20
   9  16   2   59.19    8.80
  16 -10  -2   35.30   10.10
  16 -10   2   31.00    6.80
  10  16   2   32.30    8.10
  16 -11  -2   -2.80    7.80
  11  16   2   25.00    7.00
  16 -11   2    5.00    5.60
  16 -12  -2    9.00    8.10
  12  16   2    8.50    7.00
  16 -13  -2    9.70    8.80
  13  16   2    8.10    7.00
  16 -14  -2   -3.40    8.10
  14  16   2   -6.10    6.00
  16 -15  -2   -4.90    8.20
  15  16   2   -3.90    5.80
  14 -17  -2   59.99   13.40
  13 -17  -2   29.80   11.60
  17  13   2   35.40    7.80
  12 -17  -2    7.00    9.00
  17  12   2    9.50    5.80
  11 -17  -2   26.00   10.00
  17  11  -2   24.70    6.90
  17  11   2   20.40    6.40
  17  10  -2    6.50    5.70
  10 -17  -2    1.70    7.60
  17  10   2    0.20    4.70
   9 -17  -2   37.00   10.60
  17   9  -2   40.00    8.00
  17   9   2   33.20    7.10
   8 -17  -2   22.40    8.50
  17   8  -2   24.00    6.70
  17   8   2   17.10    5.80
   7 -17  -2  204.18   19.60
  17   7  -2  214.08   16.80
  17   7   2  212.58   15.90
  17   6  -2    6.10    5.10
   6 -17  -2   -2.90    7.10
  17   6   2    2.90    4.70
   5 -17  -2    0.70    7.30
  17   5  -2    8.30    5.70
  17   5   2    7.10    4.70
   4 -17  -2   -7.20    6.40
  17   4  -2    2.40    5.20
  17   4   2    3.90    4.20
   3 -17  -2   75.99   12.50
  17   3  -2   78.19   10.20
  17   3   2   67.89    9.00
   3 -17   2   68.79    9.90
  17   2  -2   22.80    6.70
   2 -17  -2   31.70    9.60
  17   2   2   23.00    5.50
   2 -17   2   22.90    7.10
  17   1  -2    0.90    5.20
   1 -17  -2    6.40    8.20
  17   1   2    1.30    4.00
   1 -17   2    1.80    4.20
  17   0  -2   34.40    7.70
   0 -17  -2   30.40   10.30
  17   0   2   34.10    6.00
   0 -17   2   27.40    8.50
  17  -1  -2    4.80    5.70
  -1 -17   2    0.60    6.50
  17  -1   2    7.60    4.30
  -2 -17  -2   21.20    9.60
  17  -2  -2   25.70    7.90
  -2 -17   2   49.20   10.60
  17  -2   2   23.80    5.60
  17  -3  -2    8.00    6.40
  -3 -17  -2    4.90    8.80
  17  -3   2    6.80    4.40
  -3 -17   2    3.40    6.20
  17  -4  -2  105.79   13.60
  17  -4   2  119.99   11.00
  -4 -17   2  137.39   16.60
  17  -5  -2   26.90    8.30
  17  -5   2   26.90    5.90
   5  17   2   30.70    7.50
  -5 -17   2   27.30    7.80
  17  -6  -2    9.20    7.40
   6  17   2   15.30    6.70
  -6 -17   2    7.30    6.40
  17  -6   2    8.10    4.80
  17  -7  -2   20.30    7.90
  17  -7   2    8.40    5.00
   7  17   2   27.10    7.10
  17  -8  -2    9.60    7.50
  17  -8   2    5.60    4.80
   8  17   2    6.10    5.70
  17  -9  -2   83.59   13.10
  17  -9   2   94.79   11.40
   9  17   2  106.59   13.00
  17 -10  -2    3.30    7.30
  17 -10   2   -1.90    5.00
  10  17   2   -0.30    6.10
  17 -11  -2   17.20    9.30
  17 -11   2   23.50    7.20
  11  17   2   18.50    7.00
  17 -12  -2    2.30    7.80
  12  17   2    5.70    8.70
  17 -13  -2   14.60    9.60
  17 -14  -2    5.20    9.00
  18  13   2    4.20    5.60
  18  12   2    1.20    5.20
  18  11  -2   43.50    9.80
  18  11   2   39.40    7.70
  18  10  -2   27.20    7.30
  18  10   2   23.00    6.60
  18   9  -2   16.50    6.70
  18   9   2   20.40    6.20
  18   8  -2   17.30    6.20
  18   8   2   -3.70    4.60
  18   7  -2    9.10    6.10
  18   7   2    3.90    5.10
  18   6  -2   23.30    6.90
  18   6   2   16.50    5.80
  18   5  -2  106.59   12.90
  18   5   2  119.99   12.00
  18   4  -2   12.50    6.10
  18   4   2   18.40    5.60
  18   3  -2   47.40    8.60
  18   3   2   50.19    7.50
  18   2  -2   -5.10    5.10
  18   2   2   -0.60    3.90
  18   1  -2   17.50    7.20
  18   1   2   29.10    6.00
  18   0  -2    3.50    6.10
  18   0   2    0.20    4.00
   0 -18   2   -5.00    6.40
  18  -1  -2   17.40    7.60
  -1 -18  -2   29.90   15.50
  -1 -18   2   17.60    9.60
  18  -1   2   17.30    5.20
  18  -2  -2   25.70    7.90
  -2 -18   2   43.30   11.30
  18  -2   2   25.90    6.00
  18  -3  -2   -4.40    6.20
  -3 -18   2   18.40    7.50
  18  -3   2    4.60    4.50
  18  -4  -2  -11.60    6.40
  -4 -18   2    8.50    6.60
  18  -4   2    4.00    4.90
  18  -5  -2    3.50    6.40
  18  -5   2   -4.50    4.60
  18  -6  -2   44.10   10.00
  18  -6   2   40.80    7.40
  18  -7  -2    5.30    7.20
  18  -7   2   14.80    6.00
  18  -8  -2    8.60    8.60
  18  -8   2   18.80    6.40
  18  -9  -2   -7.20    6.90
  18  -9   2   -0.80    4.90
  18 -10  -2   -0.90    7.80
  18 -10   2    3.20    6.00
  18 -11  -2   46.30   11.70
  18 -11   2   56.09    9.90
  18 -12  -2   34.00   10.90
  18 -13  -2   34.60   11.40
  19  11   2   -0.20    5.20
  19  10  -2    5.40    6.30
  19  10   2    6.40    5.40
  19   9  -2    9.50    6.60
  19   9   2    8.00    5.80
  19   8  -2   47.50    8.90
  19   8   2   47.70    8.20
  19   7  -2   21.70    7.40
  19   7   2   22.20    6.50
  19   6  -2   11.90    6.50
  19   6   2    7.90    5.50
  19   5  -2    1.70    5.50
  19   5   2    2.10    5.30
  19   4  -2   -3.50    6.00
  19   4   2    4.50    4.80
  19   3  -2   80.59   11.30
  19   3   2   77.09   10.50
  19   2  -2    2.40    6.10
  19   2   2   -1.50    4.40
  19   1  -2   57.49   10.30
  19   1   2   63.19    8.50
  19   0  -2   -1.10    6.10
  19   0   2   12.00    5.10
  19  -1  -2   39.40    9.00
  19  -1   2   26.80    6.20
  19  -2  -2    9.60    7.50
  19  -2   2    7.90    5.10
  19  -3  -2   94.59   13.10
  19  -3   2  101.49   11.10
  19  -4  -2   63.39   10.90
  19  -4   2   51.29    8.20
  19  -5  -2    8.20    7.50
  19  -5   2   22.20    6.30
  19  -6  -2   -2.90    6.50
  19  -6   2    2.10    5.20
  19  -7  -2    7.00    7.60
  19  -7   2    3.00    5.50
  19  -8  -2   17.00    9.50
  19  -8   2   23.50    6.90
  19  -9  -2   -8.10    7.50
  19  -9   2   -6.80    5.20
  19 -10  -2    5.40    8.50
  19 -10   2    6.60    6.50
  19 -11  -2    8.30    9.00
  19 -11   2    2.80    6.40
  20  10  -2   45.70    9.20
  20  10   2   32.60    7.30
  20   9  -2   -0.90    6.20
  20   9   2   -1.20    4.90
  20   8  -2    0.40    6.90
  20   8   2    2.00    5.30
  20   7  -2   12.60    7.20
  20   7   2   12.30    5.70
  20   6  -2   15.40    7.40
  20   6   2    9.20    5.70
  20   5  -2   17.70    7.30
  20   5   2   11.10    5.80
  20   4  -2   17.60    7.60
  20   4   2   17.50    6.10
  20   3  -2   -0.80    6.20
  20   3   2   -6.00    4.50
  20   2  -2   10.50    7.30
  20   2   2    8.10    5.60
  20   1  -2   65.69   11.00
  20   1   2   64.49    8.90
  20   0  -2   37.20    9.30
  20   0   2   44.70    7.80
  20  -1  -2   59.79   11.00
  20  -1   2   79.39   10.90
  20  -2  -2   12.60    7.60
  20  -2   2    4.20    5.10
  20  -3  -2    0.70    7.10
  20  -3   2   -0.40    4.90
  20  -4  -2    9.70    7.70
  20  -4   2    2.10    5.30
  20  -5  -2   25.20    9.30
  20  -5   2   14.00    6.60
  20  -6  -2    0.70    7.80
  20  -6   2    0.70    5.30
  20  -7  -2   14.90    9.40
  20  -7   2   20.40    7.00
  20  -8  -2   -4.00    7.50
  20  -8   2   10.00    6.20
  20  -9  -2   -7.00    8.00
  20  -9   2    0.00    5.90
  20 -10  -2    8.20    8.90
  20 -10   2   11.00    7.00
  21   7  -2    2.60    7.20
  21   7   2   -0.20    5.40
  21   6  -2    7.20    7.30
  21   6   2    7.60    5.90
  21   5  -2   -5.30    6.70
  21   5   2   -4.50    4.80
  21   4  -2   18.90    8.40
  21   4   2   15.20    6.40
  21   3  -2    3.80    7.20
  21   3   2    1.20    5.20
  21   2  -2   31.90    9.60
  21   2   2   28.70    7.10
  21   1  -2   14.90    8.00
  21   1   2   14.60    6.40
  21   0  -2    5.10    7.10
  21   0   2   -4.70    5.30
  21  -1  -2   19.00    9.00
  21  -1   2   19.00    6.90
  21  -2  -2   27.00    9.40
  21  -2   2   21.40    7.40
  21  -3  -2   47.10   10.90
  21  -3   2   49.90    9.00
  21  -4  -2   12.00    8.60
  21  -4   2    8.20    6.30
  21  -5  -2   -3.00    7.90
  21  -5   2   -3.60    5.40
  21  -6  -2   16.20    9.40
  21  -6   2    6.90    6.00
  21  -7  -2   15.20    9.80
  21  -7   2   21.60    7.30
  22   4  -2    7.80    7.80
  22   4   2    4.10    6.30
  22   3  -2    6.50    8.20
  22   3   2    4.50    5.70
  22   2  -2    9.00    8.30
  22   2   2    6.60    6.10
  22   1  -2    2.60    7.90
  22   1   2    0.70    5.70
  22   0  -2   40.80   10.70
  22   0   2   41.40    8.70
  22  -1  -2   15.20    9.00
  22  -1   2   11.60    6.80
  22  -2  -2    0.00    8.00
  22  -2   2    8.10    6.50
  22  -3  -2   -4.20    7.50
  22  -3   2    3.60    6.30
  22  -4  -2   19.70    9.30
  22  -4   2   21.20    7.50
   0   0  -3   -1.90    3.80
  -1   0  -3  486.85   27.60
   1   0  -3  515.15   27.20
  -2  -1  -3  374.16   21.10
  -1   2  -3  334.47   19.50
   2   1  -3  305.17   18.80
   1  -2  -3  319.77   19.80
  -1   2   3  329.97   16.90
  -2   0  -3    6.20    4.60
   0   2  -3    4.40    3.80
  -2   0   3    5.30    1.60
  -2   1  -3   79.69   10.00
   1   2  -3  121.29    9.20
  -1  -2  -3  133.29   12.00
  -2   1   3  101.69    6.60
   2  -2  -3 1069.59   52.19
   2  -2  -3 1066.89   54.39
   2   2  -3 1103.19   53.39
  -2   2  -3 1031.40   53.79
  -2  -2  -3 1061.49   54.89
  -2  -2   3 1053.69   52.29
  -2   2   3 1110.59   52.09
  -3  -2  -3  394.46   23.70
   2  -3  -3  385.86   20.50
   2  -3  -3  395.76   23.10
   3   2  -3  390.46   21.40
   3   2  -3  417.26   20.60
  -2   3  -3  393.86   22.00
  -2   3   3  383.76   20.20
  -3  -2   3  373.66   20.60
   0  -3  -3  320.37   20.80
   3   0  -3  365.16   17.90
   3   0  -3  330.47   19.20
  -3   0   3  320.77   17.60
   0   3   3  328.27   17.10
   3  -1  -3    8.80    3.90
  -3   1  -3    4.80    4.80
   1   3  -3   13.40    3.70
  -1  -3  -3   11.10    5.40
   3  -1  -3    4.70    2.30
  -3   1   3   -0.60    2.00
  -2  -3  -3   22.40    6.30
   2   3  -3   23.30    4.00
  -3   2   3   17.70    2.90
  -2  -3   3   12.30    3.00
   3  -3  -3   26.10    5.40
   3   3  -3   20.70    3.70
  -3  -3  -3   35.00    6.90
   4   3  -3  124.49    9.00
   4   3  -3   93.89    7.70
  -4  -3  -3  122.69   12.50
  -4  -3   3   91.59    7.80
   4   2  -3 1826.22   93.09
   2  -4  -3 1916.01   92.39
   2  -4  -3 1848.12   94.59
  -2   4  -3 2011.50   93.29
   4   2  -3 1924.31   92.79
  -4  -2  -3 1804.42   94.99
  -2   4   3 1864.11   92.29
  -4  -2   3 2125.39   93.19
   1  -4  -3   76.09   10.30
  -1   4  -3   71.29    8.70
   4   1  -3   93.59    7.20
   1  -4  -3   94.99    6.60
  -1   4   3   83.79    6.40
  -4  -1   3   95.09    7.00
   0  -4  -3  109.49    6.30
   0   4  -3   72.49    8.10
   0  -4  -3   78.39   10.30
   0   4   3   84.39    6.50
   4  -1  -3   26.60    4.10
  -4   1  -3   32.80    6.50
   4  -1  -3   31.20    5.10
  -1  -4  -3   36.60    7.90
   1   4   3   41.20    4.80
  -4   1   3   21.20    3.30
   4  -2  -3 1699.63   86.99
  -2  -4  -3 1788.92   88.59
   4  -2  -3 1728.23   85.89
   2   4  -3 1757.82   85.89
  -4   2   3 1816.02   85.69
   2   4   3 1761.12   85.29
  -2  -4   3 1836.52   85.89
   4  -3  -3   89.09    7.60
   3   4  -3  108.19    7.90
  -3  -4  -3   93.19   10.70
   4  -3  -3   93.29    9.30
   4  -3   3   85.59    6.90
   4   4  -3  203.18   12.80
   4  -4  -3  210.78   14.60
   4   4  -3  188.38   12.20
  -4  -4  -3  212.38   16.10
   4  -4  -3  216.78   12.90
   4  -4   3  211.28   11.70
  -4   4   3  201.78   12.00
  -4  -4   3  202.28   12.80
   5   4  -3    2.10    3.10
   5   4  -3    2.50    2.40
   4  -5  -3   -1.30    4.60
  -5  -4  -3   -0.40    5.30
   4  -5  -3    0.50    2.20
   5   4   3    1.30    1.80
   4  -5   3    0.90    1.70
  -5  -4   3    2.90    2.40
  -4   5   3   -0.20    1.90
   3  -5  -3   12.70    5.20
   5   3  -3    7.30    2.60
  -5  -3  -3    6.90    6.30
   3  -5  -3    3.60    2.20
   3  -5   3    2.40    1.80
   5   3   3    3.80    2.00
  -5  -3   3    9.90    3.00
  -3   5   3    5.40    2.10
   5   2  -3   60.29    6.10
  -5  -2  -3   54.29    9.50
   5   2  -3   67.89    7.40
   2  -5  -3   59.09    8.20
   2  -5   3   49.80    4.80
  -5  -2   3   68.09    6.40
  -2   5   3   57.29    5.20
   5   1  -3   11.20    2.80
  -5  -1  -3   21.60    6.40
  -1   5  -3    4.90    3.50
   5   1  -3    6.30    3.60
   1  -5  -3   19.70    5.50
  -5  -1   3    7.20    2.80
  -1   5   3   10.90    2.40
   0  -5  -3   81.29    5.60
   5   0  -3   58.09    6.70
   0   5  -3   92.79    7.80
   5   0  -3   55.39    7.90
  -5   0   3   65.29    6.20
   0  -5   3   89.89    6.60
  -1  -5  -3    4.40    2.30
  -1  -5  -3   -3.90    6.00
  -1  -5  -3    6.70    1.90
   1   5  -3   -3.80    3.10
   5  -1  -3    7.70    2.70
  -1  -5   3    1.70    2.40
  -5   1   3    1.10    2.10
   1   5   3    3.20    2.30
   5  -1   3    9.40    2.90
  -2  -5  -3   55.49    9.20
   5  -2  -3   56.89    5.70
   5  -2  -3   63.79    7.60
  -2  -5  -3   60.69    5.30
  -2  -5  -3   66.19    4.70
   2   5  -3   55.39    5.90
  -5   2   3   56.29    5.50
   2   5   3   64.09    5.90
   5  -2   3   57.59    5.80
  -2  -5   3   46.30    5.90
   5  -3  -3   -1.30    3.90
   5  -3  -3    4.20    2.60
   3   5  -3    3.20    2.40
  -3  -5  -3    9.80    1.90
  -3  -5  -3    9.90    5.10
   3   5  -3    4.60    2.60
  -3  -5   3    0.10    2.70
  -5   3   3    3.10    2.20
  -4  -5  -3  134.29    8.30
   5  -4  -3  117.99   11.10
  -4  -5  -3  111.19   12.70
  -4  -5  -3  115.09    8.20
   4   5  -3  132.49    8.80
   5  -4  -3  107.49    9.00
  -4  -5   3  151.18    9.70
   5  -4   3  114.49    8.00
  -5   4   3  122.69    8.50
  -5  -5  -3    1.80    6.10
   5   5  -3    8.20    3.50
   5  -5  -3    9.10    4.00
   5  -5  -3    1.10    4.50
  -5  -5  -3    7.90    2.60
  -5   5   3    7.60    2.80
  -5  -5   3   13.20    3.70
   5  -5   3   12.20    2.60
  -6  -5  -3    6.00    2.30
  -6  -5  -3   11.30    7.10
   5  -6  -3    5.70    5.30
   6   5  -3    9.20    3.60
  -5   6   3    2.20    2.40
   5  -6   3    1.50    2.00
   6   5   3    3.60    2.40
  -6  -5   3   -0.70    2.80
   5  -6   3    2.50    1.90
   6   4  -3  941.41   49.00
   4  -6  -3  985.00   51.09
  -6  -4  -3  944.91   52.09
   4  -6  -3 1043.10   50.09
  -6  -4   3  944.81   49.50
   6   4   3  956.10   48.40
  -4   6   3 1043.80   48.90
   4  -6   3  945.11   47.20
   6   3  -3   95.59    8.20
  -6  -3  -3  108.29   13.70
   3  -6  -3   98.19    7.80
   6   3  -3  113.59    9.30
   3  -6  -3  107.39   11.80
   6   3   3   94.49    7.00
  -6  -3   3  101.59    8.60
  -3   6   3   92.89    7.40
   3  -6   3  101.79    6.10
   2  -6  -3   23.80    6.20
   2  -6  -3   28.60    3.80
   6   2  -3   29.30    4.50
   6   2  -3   20.20    4.80
  -6  -2   3   24.80    4.40
  -2   6   3   24.20    3.60
   2  -6   3   23.00    3.60
   6   2   3   22.20    4.30
   1  -6  -3   10.80    5.70
   1  -6  -3   20.00    3.20
   6   1  -3   19.30    4.20
   6   1   3   15.40    3.90
   1  -6   3   15.70    3.10
   1  -6   3   17.00    3.20
  -1   6   3   17.10    3.10
  -6  -1   3   15.90    3.30
   6   0  -3  340.77   18.60
   6   0  -3  322.67   19.10
   0  -6  -3  327.17   21.90
   0  -6  -3  326.87   17.40
  -6   0   3  335.57   18.30
   0  -6   3  337.67   17.60
   0  -6   3  312.27   17.90
   6   0   3  298.87   18.10
   0   6   3  328.47   17.90
  -1  -6  -3  127.19    8.80
   6  -1  -3  101.09   10.20
   6  -1  -3  138.49    9.50
  -1  -6  -3   99.79   13.10
  -1  -6  -3  133.89    8.00
   6  -1   3  121.79    8.90
  -1  -6   3  117.09    8.80
   1   6   3  130.39    8.70
  -6   1   3  119.29    8.70
  -2  -6  -3    1.60    5.50
  -2  -6  -3    1.30    2.20
  -2  -6  -3    2.20    1.70
   6  -2  -3    3.40    2.40
   6  -2  -3   -2.10    3.40
  -2  -6   3   12.20    3.00
   6  -2   3    2.40    2.30
   2   6   3    1.80    2.50
  -6   2   3   -1.10    1.80
  -3  -6  -3    0.80    2.00
   3   6  -3   -1.10    2.10
  -3  -6  -3   -2.20    4.80
   6  -3  -3   -3.20    3.50
   6  -3  -3   -0.10    2.30
   6  -3   3    2.20    2.20
  -6   3   3   -0.80    2.00
  -3  -6   3   -0.80    2.60
  -4  -6  -3   43.40    5.30
  -4  -6  -3   39.00    8.40
   6  -4  -3   43.90    7.60
   6  -4  -3   44.90    6.30
   4   6  -3   33.50    5.10
  -6   4   3   39.90    5.10
  -4  -6   3   59.99    6.80
   6  -6  -3  536.95   32.10
  -6  -6  -3  560.94   30.00
   6   6  -3  566.64   30.00
  -6  -6  -3  559.94   34.70
   6  -6   3  567.34   28.90
  -6   6   3  603.14   30.30
  -6  -6   3  598.34   31.40
   6  -6   3  578.04   28.60
  -7  -6  -3    3.10    2.50
   7   6  -3    0.40    3.30
   6  -7  -3    6.20    5.90
  -7  -6   3    1.00    3.20
   6  -7   3    3.80    1.90
  -6   7   3    0.40    2.90
   6  -7   3    0.30    2.20
   7   6   3    4.30    4.00
   7   6   3    4.90    2.90
   5  -7  -3   -6.80    5.80
   7   5  -3   -0.10    3.40
  -7  -5  -3    4.60    2.60
  -5   7   3    4.70    2.80
   7   5   3    6.90    3.80
   5  -7   3    5.20    1.90
  -7  -5   3   10.10    4.20
   7   5   3    9.70    3.20
   5  -7   3    3.80    2.50
   4  -7  -3  132.09   13.70
   7   4  -3  158.08   10.60
   7   4   3  112.09    8.70
  -7  -4   3  116.29   10.00
   4  -7   3  118.59    7.00
   4  -7   3  125.29    8.10
   7   4   3  116.99   10.10
  -3   7   3   37.60    5.00
   7   3   3   40.30    5.00
   3  -7   3   47.20    5.00
   7   3   3   37.40    5.50
   2  -7  -3  140.19   13.60
   7   2  -3  155.98   11.60
   7   2  -3  133.49   11.10
   7   2   3  132.29   10.20
  -2   7   3  138.39    9.90
  -7  -2   3  141.19   10.20
   2  -7   3  136.19    9.10
   1  -7  -3   12.50    6.40
   7   1  -3   12.00    3.40
   7   1  -3   17.10    4.80
  -1   7   3    9.20    3.20
   1  -7   3   11.20    3.10
   7   1   3    8.00    3.40
  -7  -1   3   19.00    3.60
   1  -7   3   10.90    3.10
   7   0  -3   70.29    8.20
   7   0  -3   75.19    7.50
   0  -7  -3  103.59   13.10
   7   0   3   63.49    7.60
  -7   0   3   72.79    6.80
   0   7   3   73.89    7.20
   7  -1  -3   -6.40    3.70
   7  -1  -3    0.40    2.80
  -1  -7  -3    2.90    2.80
  -1  -7  -3   -6.50    6.20
  -1  -7   3    1.20    2.70
  -7   1   3   -0.50    2.30
   1   7   3    4.00    3.00
   7  -1   3    8.50    3.00
  -2  -7  -3    0.20    2.70
  -2  -7  -3   -8.60    5.50
   7  -2  -3    0.20    2.40
   7  -2  -3    6.10    4.40
  -2  -7   3    0.10    2.60
   7  -2   3    4.90    3.20
   2   7   3   -5.70    3.00
  -7   2   3    0.90    2.20
   7  -3  -3   10.00    4.70
  -3  -7  -3   -1.00    5.70
   7  -3  -3    6.70    3.70
  -3  -7  -3    6.90    3.30
  -3  -7   3    5.40    3.40
   7  -3   3    7.40    3.00
  -7   3   3    9.30    2.80
  -5  -7  -3    3.80    2.90
  -5  -7  -3    3.60    6.80
   5   7  -3    4.80    3.30
   7  -5  -3  -14.50    5.40
  -7   5   3   -2.60    2.50
   7  -5   3    0.10    2.20
  -6  -7  -3   10.50    3.40
   7  -6  -3   -2.50    5.40
  -6  -7  -3   12.90    8.50
   6   7  -3   -7.60    3.80
  -7   6   3   -0.80    2.80
   7  -6   3    4.50    2.30
   7  -6   3    2.40    2.40
  -6  -7   3    2.90    3.60
   7  -7  -3   25.30    6.90
  -7  -7  -3    4.40    2.90
   7   7  -3    2.80    3.30
  -7  -7   3    0.20    3.50
   7  -7   3   -4.50    2.50
   7   7   3    0.30    3.90
   7  -7   3    3.10    2.10
   7  -8  -3   37.10    7.90
  -7   8  -3   24.90    4.50
   8   7  -3   34.00    5.50
  -7   8   3   34.90    5.50
   7  -8   3   26.50    4.60
   8   7   3   22.80    5.80
   8   7   3   27.00    4.90
   7  -8   3   29.80    3.40
  -6   8  -3  898.31   46.30
   8   6  -3  860.71   47.10
   6  -8  -3  970.80   49.99
  -8  -6  -3  922.71   47.10
   8   6   3  942.31   47.50
  -8  -6   3  933.61   48.60
  -6   8   3  967.20   47.50
   6  -8   3  946.01   45.10
   6  -8   3  937.61   46.40
   8   6   3  914.51   47.80
  -8  -5  -3  157.48   10.60
   5  -8  -3  181.08   16.10
   8   5  -3  159.18   12.00
   8   5   3  156.78   12.00
  -5   8   3  170.18   11.50
   5  -8   3  160.78    8.80
   8   5   3  151.68   11.00
   5  -8   3  161.78   10.50
  -8  -5   3  152.48   12.50
  -8  -4  -3 1279.87   64.89
   4  -8  -3 1455.95   68.79
   8   4  -3 1263.77   65.89
   4  -8   3 1300.57   63.09
   8   4   3 1257.67   65.29
   4  -8   3 1330.87   64.69
   8   4   3 1300.87   65.99
  -8  -4   3 1346.67   66.89
  -4   8   3 1374.26   65.69
   3  -8  -3    9.80    6.10
   8   3  -3    9.40    4.30
   8   3   3    3.00    2.50
   3  -8   3    4.30    3.00
   8   3   3    0.00    3.30
  -3   8   3    6.20    3.30
   8   2  -3    3.80    4.00
   2  -8  -3   -2.50    5.20
   8   2   3    2.70    2.70
   2  -8   3   -5.30    2.60
  -2   8   3    0.00    2.70
   8   2   3   10.00    3.70
  -8  -2   3    2.00    2.90
   8   1  -3   36.40    6.50
   1  -8  -3   47.30    8.60
  -1   8   3   35.90    5.40
  -8  -1   3   48.50    6.40
   8   1   3   39.10    4.90
   8   1   3   35.10    5.10
   1  -8   3   31.70    5.20
   1  -8   3   39.70    5.70
   0  -8  -3 1938.51   94.19
   8   0  -3 1844.72   91.79
   8   0   3 1782.42   90.69
   0  -8   3 1889.81   90.79
   0  -8   3 1885.91   90.59
   0   8   3 1869.41   91.09
  -8   0   3 1818.02   91.39
  -1  -8  -3   15.00    7.70
   8  -1  -3   17.70    5.80
  -1  -8  -3   22.00    4.30
  -8   1   3   15.30    3.80
   8  -1   3   13.40    3.30
   8  -1   3   18.20    3.90
   1   8   3   11.80    4.10
  -2  -8  -3  239.78   19.40
  -2  -8  -3  246.88   15.60
   8  -2  -3  236.18   16.90
   2   8   3  243.08   16.00
  -8   2   3  260.37   15.50
  -2  -8   3  245.88   15.70
   8  -2   3  275.37   14.90
   8  -3  -3   -5.10    4.60
  -3  -8  -3   -3.80    5.80
  -3  -8  -3   -1.00    3.30
  -3  -8   3    2.20    3.10
  -8   3   3   -1.30    2.50
   8  -3   3    6.30    2.90
  -4  -8  -3  371.16   21.80
  -4  -8  -3  374.56   25.90
  -8   4   3  392.76   21.70
   8  -4   3  404.46   20.60
  -4  -8   3  368.96   22.80
   5   8  -3   37.20    4.80
   8  -5  -3   35.70    6.80
  -5  -8  -3   31.70    9.30
  -5  -8  -3   27.80    5.00
  -8   5   3   23.40    4.60
   8  -5   3   45.40    5.10
  -5  -8   3   29.30    5.90
   8  -5   3   26.00    4.30
   8  -6  -3   44.50    8.10
  -6  -8  -3   46.40   11.60
  -6  -8  -3   59.29    7.40
   8  -6   3   40.10    5.10
  -6  -8   3   46.30    7.20
  -8   6   3   44.10    5.90
   7   8  -3   29.80    5.40
   8  -7  -3   42.50    8.50
  -8   7   3   48.50    6.60
   8  -7   3   35.50    5.10
  -7  -8   3   40.30    6.80
   8  -7   3   50.19    4.90
   8   8  -3   19.80    4.80
   8  -8   3   28.90    3.60
   8   8   3   28.70    6.10
  -8  -8   3   34.40    6.10
  -8   8   3   26.40    5.00
   8  -8   3   31.00    4.50
   8  -9  -3    2.10    5.90
   9   8  -3    5.60    3.60
   8  -9   3    5.70    2.40
  -9  -8   3    6.90    4.30
   9   8   3    3.20    4.40
  -8   9   3    2.90    3.20
   7  -9  -3   18.90    7.10
   9   7  -3    3.50    4.00
   7  -9   3   12.30    2.60
   9   7   3    8.60    4.80
  -9  -7   3   11.90    4.60
   7  -9   3    7.50    3.20
   9   7   3    2.40    4.60
  -7   9   3   10.30    3.90
   6  -9  -3   11.10    6.80
   9   6  -3   -1.70    4.40
  -6   9  -3   10.80    3.50
   9   6   3    1.50    4.60
  -9  -6   3   17.60    4.70
   6  -9   3    9.80    3.20
   9   6   3    8.30    3.50
  -6   9   3    3.20    3.20
   5  -9  -3   23.30    7.00
  -9  -5  -3    5.80    2.80
   9   5  -3   11.00    4.60
  -9  -5   3    6.20    4.10
  -5   9   3    6.50    3.30
   5  -9   3    7.40    2.80
   9   5   3    2.50    2.70
   9   5   3   -0.50    4.10
  -9  -4  -3   11.70    3.00
   4  -9  -3   25.20    7.30
   9   4  -3   11.10    4.80
   9   4   3    2.70    3.70
  -4   9   3   17.30    3.90
  -9  -4   3   11.00    4.60
   4  -9   3    7.00    3.10
   9   4   3    8.70    3.20
   3  -9  -3   20.50    7.10
  -9  -3  -3   14.90    3.20
   9   3  -3   16.50    5.20
   3  -9   3    9.20    3.70
  -9  -3   3    9.80    4.20
   9   3   3   13.70    4.20
   9   3   3   14.10    3.60
  -3   9   3   15.20    4.40
   9   2  -3    3.60    4.20
   2  -9  -3   19.20    6.70
  -2   9   3    7.00    4.10
  -9  -2   3   10.90    3.70
   9   2   3   10.60    3.90
   9   2   3    4.80    2.90
   2  -9   3   -0.70    3.00
   1  -9  -3   30.60    8.80
   9   1  -3   21.80    5.70
  -1   9   3   21.90    4.80
   1  -9   3   16.40    4.60
   9   1   3   21.90    4.60
   1  -9   3   23.10    4.90
   9   1   3   19.00    4.00
  -9  -1   3   22.90    4.50
   9   0  -3    1.50    5.20
   9   0   3    8.90    3.60
   9   0   3    3.30    2.90
  -9   0   3    5.40    3.30
   0  -9   3    3.10    3.80
   0   9   3   15.30    3.90
   0  -9   3    6.20    4.10
  -1  -9  -3   18.00    4.20
   9  -1  -3  -11.70    5.50
  -1  -9  -3   28.80    8.00
   9  -1   3    6.00    3.10
  -9   1   3   11.30    3.90
   9  -1   3   -1.60    3.50
  -2  -9  -3   78.19    8.40
  -2  -9  -3   64.49   11.20
   9  -2  -3   59.19    9.50
   9  -2   3   78.39    7.50
   9  -2   3   71.89    6.90
   2   9   3   69.09    8.70
  -9   2   3   66.89    7.40
  -2  -9   3   79.29    9.20
  -3  -9  -3   13.00    4.60
   9  -3  -3   10.70    5.80
  -3  -9  -3   13.60    7.30
  -9   3   3   18.50    4.20
  -3  -9   3    9.80    4.10
   9  -3   3   14.60    3.60
   9  -3   3   16.40    3.60
  -5  -9  -3    7.10    7.00
  -5  -9  -3    2.60    3.30
   9  -5  -3  -10.10    4.90
   9  -5   3   -2.00    2.40
   9  -5   3   -1.50    2.50
   6   9  -3   53.59    6.90
  -6  -9  -3   37.50   10.80
   9  -6  -3   28.00    7.60
   9  -6   3   39.70    5.00
  -6  -9   3   54.39    8.50
   9  -6   3   36.90    5.30
  -9   6   3   35.00    5.70
   7   9  -3    7.00    3.00
   9  -7  -3   -5.50    5.10
  -9   7   3   -1.00    2.90
   9  -7   3   -3.10    2.10
   9  -7   3    0.10    2.60
  -7  -9   3    0.90    3.40
   9  -8  -3   80.79   11.00
   8   9  -3   61.59    6.90
   9  -8   3   50.29    5.30
  -9   8   3   60.69    7.30
  -8  -9   3   51.49    7.90
   8   9   3   56.49    8.10
   9  -9  -3   -8.30    5.40
   9   9  -3   -4.50    2.70
   9   9   3   -1.90    3.90
  -9  -9   3   -4.10    2.90
   9  -9   3   -0.40    2.10
  -9   9   3    2.40    3.00
   9 -10  -3   26.00    8.00
 -10  -9   3   17.00    5.50
  -9  10   3   39.20    6.00
  10   9   3   17.40    5.70
   8 -10  -3   -6.10    5.70
  10   8  -3    1.10    4.00
   8 -10   3    2.60    2.40
 -10  -8   3    3.10    3.90
  -8  10   3    0.90    3.10
  10   8   3    8.60    4.30
   7 -10  -3   11.00    7.00
  10   7  -3    5.70    4.20
  10   7   3    9.30    4.60
 -10  -7   3   11.20    4.70
   7 -10   3   12.20    2.70
  -7  10   3   15.00    4.30
   6 -10  -3   40.30    8.90
  10   6  -3   39.70    6.60
  10   6   3   44.40    6.90
  -6  10   3   35.10    6.00
 -10  -6   3   30.30    6.40
  10   5  -3  127.89   12.30
   5 -10  -3  161.98   16.20
  10   5   3  148.49   12.40
 -10  -5   3  164.88   13.30
  -5  10   3  161.08   11.80
  10   5   3  145.59   11.40
   5 -10   3  159.88   10.70
  10   4  -3   -4.40    4.00
   4 -10  -3    2.00    6.70
   4 -10   3    1.70    2.60
  10   4   3   -2.50    3.50
  10   4   3    3.10    2.80
  -4  10   3    1.70    3.20
 -10  -4   3    0.30    3.50
  10   3  -3   -9.90    4.20
   3 -10  -3   22.60    6.80
 -10  -3  -3   -1.40    1.90
  10   3   3    0.40    2.60
   3 -10   3   -4.70    2.70
  -3  10   3    4.40    3.40
 -10  -3   3   -2.60    3.00
  10   3   3   -3.20    3.30
  10   2  -3   84.89   10.20
 -10  -2  -3   92.99    7.00
 -10  -2   3   89.09    8.90
  10   2   3   86.69    8.40
  -2  10   3  104.29    9.50
  10   2   3   85.59    8.20
   2 -10   3   69.39    8.30
  10   1  -3  155.08   13.60
  10   1   3  173.18   12.00
   1 -10   3  163.28   12.10
 -10  -1   3  176.78   12.50
   1 -10   3  143.89   12.10
  10   1   3  173.28   11.60
  10   0  -3  135.19   13.60
   0 -10  -3  195.98   18.10
  10   0   3  155.28   11.10
   0  10   3  161.38   12.50
 -10   0   3  179.18   12.30
  10   0   3  150.58   11.50
  -1 -10  -3   37.80    6.30
  10  -1  -3   38.50    7.20
  -1 -10  -3   42.60    9.90
  10  -1   3   31.00    4.80
 -10   1   3   35.50    5.60
   1  10   3   37.30    7.00
  -1 -10   3   29.00    6.30
  10  -1   3   33.80    5.30
  -1 -10   3   40.40    8.20
  10  -2  -3    6.20    5.90
  -2 -10  -3   17.70    7.90
  -2 -10  -3   13.00    4.70
  10  -2   3   11.20    3.70
 -10   2   3   13.30    4.10
  -2 -10   3   17.90    4.90
  10  -2   3   10.30    3.40
   2  10   3   11.70    4.80
  -2 -10   3   12.70    4.90
  -3 -10  -3    7.70    4.70
  10  -3  -3    6.90    5.50
  -3 -10  -3   16.20    7.40
  10  -3   3    8.80    3.50
 -10   3   3    7.20    3.60
  -3 -10   3    7.60    4.50
  10  -3   3    5.10    3.10
  10  -4  -3  622.74   35.70
  -4 -10  -3  626.44   37.70
 -10   4   3  667.13   34.10
  10  -4   3  624.14   33.00
  10  -4   3  624.54   32.30
  -4 -10   3  615.24   34.60
  -5 -10  -3   24.30    8.80
  10  -5  -3    4.90    5.80
  -5 -10   3   13.00    6.20
  10  -5   3   16.80    3.50
  10  -5   3   10.40    3.80
 -10   5   3    6.00    3.60
  10  -6  -3  891.31   51.69
  -6 -10  -3 1110.49   55.19
 -10   6   3  989.70   50.29
  10  -6   3  962.10   48.30
  10  -6   3  955.60   49.40
  -6 -10   3  965.70   51.49
   8  10  -3   59.89    7.70
  10  -8  -3   77.19   11.00
  -8 -10   3   86.69   10.10
  10  -8   3   79.09    6.50
 -10   8   3   86.49    8.50
   8  10   3   73.39   10.10
   9  10  -3   -4.60    2.60
  10  -9  -3   -0.10    6.20
 -10   9   3   -3.40    3.00
  -9 -10   3    0.80    3.60
   9  10   3   -1.80    4.40
  10  -9   3    3.10    2.50
  10 -10  -3   73.89   12.00
  10  10   3   98.29   10.80
 -10 -10   3   59.79    9.30
  10 -10   3   85.69    7.10
 -10  10   3   76.19    8.60
  10 -11  -3   -1.20    6.20
  11  10  -3   -4.50    4.00
 -10  11   3    5.70    3.80
 -11 -10   3    5.40    4.50
  11  10   3   -1.10    4.50
  11   9  -3   -8.40    4.00
   9 -11  -3   -9.60    6.00
  11   9   3    7.00    5.00
 -11  -9   3    4.00    4.30
  -9  11   3    3.20    3.70
  11   8  -3   -3.10    4.00
   8 -11  -3   16.00    7.50
 -11  -8   3    1.70    4.20
  11   8   3    3.00    4.30
  -8  11   3    0.90    3.50
  11   7  -3    5.00    4.80
   7 -11  -3    0.20    6.70
 -11  -7   3    5.20    4.60
  -7  11   3    7.50    4.10
  11   7   3   11.70    4.80
   6 -11  -3   10.90    6.40
  11   6  -3   -1.60    4.10
 -11  -6   3    2.80    4.20
  -6  11   3    2.30    3.30
  11   6   3    2.80    4.10
  11   5  -3   31.90    6.30
   5 -11  -3   11.10    7.40
  11   5   3   11.90    5.10
 -11  -5   3   31.10    6.50
  -5  11   3   16.10    4.70
  11   4  -3   -0.50    4.90
   4 -11  -3  -10.80    6.10
  11   4   3    3.40    3.80
 -11  -4   3   12.50    4.60
  -4  11   3    2.30    3.50
  11   3  -3   -4.10    4.10
   3 -11  -3   -4.60    6.00
 -11  -3   3    1.00    3.20
   3 -11   3   -2.20    3.30
  -3  11   3    1.60    3.30
  11   3   3    0.60    2.70
  11   3   3   -1.30    3.30
   2 -11  -3    8.30    7.10
  11   2  -3   -3.10    5.10
   2 -11   3    5.30    3.60
  11   2   3    6.20    3.90
  -2  11   3    4.00    3.90
   2 -11   3    7.30    3.80
 -11  -2   3    5.20    3.80
  11   2   3    4.70    3.40
   1 -11  -3    0.80    7.20
  11   1  -3  -10.10    4.70
   1 -11   3   -1.20    3.10
  -1  11   3   -0.10    3.50
  11   1   3   -1.90    3.30
  11   1   3    0.70    2.70
 -11  -1   3    5.70    3.40
   1 -11   3    3.20    3.50
  11   0  -3   19.50    6.30
   0 -11  -3   57.49   10.00
  11   0   3   25.80    4.80
 -11   0   3   22.50    5.30
   0  11   3   30.90    6.30
  11   0   3   24.00    5.00
   0 -11   3   31.40    5.50
   0 -11   3   33.90    6.40
  11  -1  -3   21.00    6.30
  -1 -11  -3   19.80    8.40
  11  -1   3   17.20    4.70
  11  -1   3   18.70    4.30
 -11   1   3   23.10    5.40
  -1 -11   3   19.70    5.30
  -1 -11   3   30.00    8.00
   1  11   3   30.20    6.20
  11  -2  -3   10.20    6.90
  -2 -11  -3   22.30    8.30
 -11   2   3   16.90    4.80
  11  -2   3   16.70    4.20
  11  -2   3   24.30    4.70
  -2 -11   3   33.00    6.40
  -3 -11  -3    9.50    7.90
  11  -3  -3    8.20    6.70
  11  -3   3   19.90    4.10
 -11   3   3   15.50    4.40
  11  -3   3   16.80    4.20
  -3 -11   3   21.70    5.90
  -4 -11  -3   -2.80    7.60
  11  -4  -3   -1.00    5.90
  -4 -11   3   -0.60    3.60
 -11   4   3   -0.90    2.90
  11  -4   3    1.30    2.80
  11  -4   3   -1.60    2.90
  11  -5  -3   10.90    5.90
  -5 -11   3    7.20    4.70
 -11   5   3    1.50    3.20
  11  -5   3    2.80    3.00
  -6 -11  -3   52.19   11.00
  11  -6  -3   31.60    7.80
 -11   6   3   27.00    5.30
  11  -6   3   30.40    4.40
  -6 -11   3   27.90    6.30
  11  -7  -3   18.40    7.10
 -11   7   3   19.70    5.10
  -7 -11   3   25.30    7.10
  11  -7   3   13.70    3.50
  11  -8  -3   39.80    8.60
  11  -8   3   34.70    4.70
 -11   8   3   45.40    7.00
   8  11   3   35.60    7.20
  -8 -11   3   38.10    7.40
  11  -9  -3    2.20    6.40
  -9 -11   3    1.00    4.30
 -11   9   3    1.40    3.20
   9  11   3    3.30    5.20
  11  -9   3    0.60    2.90
  11 -10  -3   10.10    6.90
 -11  10   3    0.20    3.50
  11 -10   3    3.30    3.00
 -10 -11   3    3.30    4.50
  10  11   3    2.80    4.90
  11 -11  -3   -0.30    6.70
 -11  11   3   -2.30    3.50
 -11 -11   3    2.70    4.60
  11  11   3    9.20    5.50
  11 -12  -3    6.10    7.70
 -12 -11   3    9.60    5.20
  12  11   3   12.10    6.50
  10 -12  -3  152.58   17.10
  12  10   3  122.99   13.00
 -12 -10   3  134.79   13.40
 -10  12   3  126.49   11.80
  12   9  -3   17.10    5.90
   9 -12  -3   20.10    8.60
  -9  12   3   25.00    5.70
 -12  -9   3   20.90    6.50
   8 -12  -3  109.59   15.00
  12   8  -3  100.99   11.30
  -8  12   3  105.69   10.40
 -12  -8   3   93.49   11.70
  12   8   3  113.49   11.10
   7 -12  -3   18.10    8.40
  12   7  -3   23.40    6.00
  -7  12   3   31.70    6.20
  12   7   3   20.60    5.50
 -12  -7   3   23.70    6.70
  12   6  -3  608.04   34.90
   6 -12  -3  611.24   37.60
  12   6   3  616.44   34.30
 -12  -6   3  680.03   36.50
  -6  12   3  643.04   35.00
  12   5  -3   18.90    6.40
   5 -12  -3   14.80    7.60
  12   5   3   38.90    6.10
 -12  -5   3   32.40    6.50
  -5  12   3   33.90    6.10
   4 -12  -3  195.48   17.80
  12   4  -3  195.28   15.70
  -4  12   3  221.28   15.30
 -12  -4   3  221.98   15.80
  12   4   3  218.08   14.90
   3 -12  -3    2.50    6.90
  -3  12   3    2.70    3.60
 -12  -3   3    4.00    3.70
  12   2  -3   10.40    5.30
   2 -12  -3    5.00    7.50
   2 -12   3   23.10    5.10
 -12  -2   3   12.90    4.40
  -2  12   3   16.80    5.20
  12   2   3   14.70    4.40
  12   1  -3   66.19    9.40
   1 -12  -3   58.69   11.00
 -12  -1   3   57.39    7.90
  12   1   3   62.79    7.70
  -1  12   3   63.29    8.60
   1 -12   3   55.29    7.90
   0 -12  -3  252.57   20.80
  12   0  -3  221.58   17.10
 -12   0   3  248.98   16.50
   0  12   3  228.28   16.90
   0 -12   3  231.68   16.60
  12   0   3  251.67   15.20
  12  -1  -3    7.60    5.70
  -1 -12  -3    6.50    7.70
  12  -1   3   15.90    3.70
  -1 -12   3   20.10    7.40
   1  12   3   12.00    5.40
 -12   1   3    7.90    4.00
  12  -2  -3   20.00    6.70
  -2 -12  -3    9.90    8.70
  -2 -12   3   23.90    6.00
  12  -2   3   13.90    3.90
 -12   2   3   14.40    4.60
  -3 -12  -3   32.70   10.70
  12  -3  -3   38.10    8.00
  -3 -12   3   42.30    7.20
  12  -3   3   37.80    5.30
 -12   3   3   30.90    5.60
  -4 -12  -3    6.70    9.30
  12  -4  -3   12.30    6.60
  12  -4   3   13.50    3.90
  -4 -12   3   15.40    5.10
 -12   4   3   13.30    4.40
  -5 -12  -3   79.89   13.40
  12  -5  -3   62.89   10.20
  12  -5   3   66.59    6.90
 -12   5   3   61.09    7.80
  -5 -12   3   71.09   10.10
  -6 -12  -3  197.78   21.00
  12  -6  -3  191.28   17.00
  12  -6   3  200.68   12.60
 -12   6   3  195.68   14.20
  -6 -12   3  211.18   16.60
  12  -7  -3    1.70    5.90
  -7 -12   3   10.50    5.60
  12  -7   3   19.60    3.60
  12  -8  -3    1.40    6.00
  12  -8   3    0.00    3.00
  -8 -12   3    8.00    4.60
   8  12   3   -3.80    4.80
 -12   8   3   -0.60    3.20
  12  -9  -3    7.50    6.80
  12  -9   3    7.80    3.30
   9  12   3   16.60    6.50
 -12   9   3    4.40    3.90
  -9 -12   3    9.00    5.40
  12 -10  -3  241.68   20.50
  10  12   3  254.57   18.00
 -10 -12   3  241.88   19.00
  12 -10   3  244.08   15.10
 -12  10   3  249.78   20.30
  12 -11  -3   10.60    7.90
 -11 -12   3   11.60    5.30
  11  12   3   25.70    6.70
  12 -12  -3   36.80   10.10
 -12 -12   3   29.90    7.20
  12  12   3   33.30    7.60
  12 -13  -3   -1.50    7.40
  13  12   3   -0.80    5.00
  11 -13  -3   -5.10    7.70
 -13 -11   3    7.00    7.10
  13  11   3    3.30    5.20
  13  10  -3   16.80    6.30
  10 -13  -3   11.00    8.70
  13  10   3   17.10    6.20
 -13 -10   3   21.80    6.80
  13   9  -3    6.30    5.40
   9 -13  -3    7.60    7.90
  -9  13   3   14.60    5.00
  13   9   3   11.80    5.80
 -13  -9   3   12.90    5.80
  13   8  -3   -2.00    5.70
   8 -13  -3   10.20    8.50
  -8  13   3   16.60    5.70
 -13  -8   3   16.10    6.60
  13   8   3   22.50    6.30
  13   7  -3    6.30    5.40
   7 -13  -3    0.30    6.90
  13   7   3    4.60    4.80
  -7  13   3    5.50    4.30
 -13  -7   3    2.10    4.70
  13   6  -3   23.70    6.10
   6 -13  -3    3.00    6.80
 -13  -6   3    4.60    4.50
  -6  13   3    3.10    3.70
  13   6   3    4.00    4.30
   5 -13  -3    6.20    6.80
  13   5  -3   11.70    5.50
  13   5   3    9.00    4.70
 -13  -5   3   11.40    4.90
  -5  13   3    7.20    4.50
  13   4  -3   12.90    5.80
   4 -13  -3    3.00    7.00
  -4  13   3   17.20    5.30
  13   4   3    9.30    4.40
 -13  -4   3    9.90    4.70
   3 -13  -3   17.20    7.90
  13   3  -3   15.60    5.90
 -13  -3   3    9.50    4.80
  13   3   3   18.80    5.10
  -3  13   3   10.70    4.80
   2 -13  -3   22.70    8.50
  13   2  -3   12.00    6.20
  -2  13   3   19.70    5.60
   2 -13   3    8.40    4.30
  13   2   3   20.30    5.00
 -13  -2   3   14.20    4.90
  13   1  -3    4.90    5.40
   1 -13  -3    5.20    7.40
   1 -13   3    3.70    3.80
  -1  13   3    0.60    4.50
  13   1   3    7.60    3.60
 -13  -1   3    3.60    3.60
  13   0  -3   -3.50    4.70
   0 -13  -3   14.90    7.80
   0 -13   3    2.30    4.50
  13   0   3    2.50    3.40
   0  13   3    1.20    4.70
 -13   0   3    0.10    3.40
  13  -1  -3    0.50    5.20
  -1 -13  -3   12.50    7.40
   1  13   3   13.70    4.90
  -1 -13   3   -4.40    5.90
 -13   1   3   -0.20    3.40
  13  -1   3    2.00    3.30
  -2 -13  -3   16.70    8.20
  13  -2  -3   -5.90    5.30
  13  -2   3    2.80    3.30
 -13   2   3    3.00    3.50
  -3 -13  -3    8.70    8.40
  13  -3   3   13.30    3.90
  -3 -13   3   11.00    5.20
  13  -4  -3   -0.40    5.90
  -4 -13  -3   11.70    8.60
 -13   4   3    1.20    3.00
  13  -4   3    3.20    3.20
  -4 -13   3    9.90    4.60
  -5 -13  -3   13.10    9.20
  13  -5  -3    2.20    5.90
  13  -5   3   -2.90    3.10
 -13   5   3    1.70    3.30
  -5 -13   3   -2.40    3.50
  -6 -13  -3    2.80    8.90
  13  -6  -3  -13.80    5.50
  13  -6   3   -4.00    2.80
 -13   6   3   -2.00    3.10
  13  -7  -3   21.00    7.50
  13  -7   3    1.60    3.10
  -7 -13   3    2.90    5.00
   7  13   3   -0.80    5.20
 -13   7   3    2.40    3.60
  13  -8  -3   -1.80    5.90
  13  -8   3   -2.00    2.80
 -13   8   3   -2.60    3.30
   8  13   3    0.50    5.30
  -8 -13   3   -3.30    4.90
  13  -9  -3   -2.60    6.50
  13  -9   3    1.20    3.20
   9  13   3    5.70    5.60
  -9 -13   3    3.50    4.80
  13 -10  -3   15.50    8.30
  13 -10   3   13.00    4.30
  10  13   3   24.80    7.40
 -10 -13   3   11.20    5.90
  13 -11  -3   13.80    8.80
  11  13   3   10.80    6.30
 -11 -13   3   13.10    5.90
  13 -12  -3   17.50    9.30
  12  13   3   28.20    7.50
  13 -13  -3    5.90    8.40
  13  13   3    6.80    5.90
  13 -14  -3   -7.20    7.80
  14  13   3   -0.40    5.70
  12 -14  -3   26.90   10.90
  14  12   3   40.80    8.70
  11 -14  -3    2.30    8.30
  14  11   3    6.70    6.00
  14  10  -3   -9.80    5.60
  10 -14  -3   -2.00    7.30
  14  10   3  -13.70    5.10
  14   9  -3    0.30    5.40
   9 -14  -3    0.30    7.50
  14   9   3    1.50    5.40
 -14  -9   3    4.40    7.20
   8 -14  -3   -6.40    7.20
  14   8  -3    0.80    5.10
 -14  -8   3   -2.00    4.80
  14   8   3    6.50    5.30
  -8  14   3    4.20    5.20
  14   7  -3   30.10    7.40
   7 -14  -3   29.30    9.50
  14   7   3   37.90    7.10
  -7  14   3   33.10    7.40
 -14  -7   3   24.90    6.70
  14   6  -3  211.08   16.50
   6 -14  -3  214.38   19.30
  -6  14   3  220.48   16.50
  14   6   3  199.98   15.70
 -14  -6   3  209.68   16.80
   5 -14  -3   -5.00    6.30
  14   5  -3    7.70    5.60
  14   5   3    3.00    4.50
 -14  -5   3    0.20    3.90
  -5  14   3    5.80    4.10
   4 -14  -3    8.60    7.60
  14   4  -3    9.00    5.80
  -4  14   3   14.20    5.00
  14   4   3    6.10    5.00
 -14  -4   3    8.40    4.60
  14   3  -3   41.00    8.10
   3 -14  -3   30.80    9.80
  -3  14   3   37.70    7.30
  14   3   3   36.90    6.60
   3 -14   3   40.50    7.10
 -14  -3   3   37.10    7.10
   2 -14  -3  138.29   16.30
  14   2  -3  139.29   13.70
  -2  14   3  142.29   13.50
 -14  -2   3  144.69   12.80
  14   2   3  151.08   11.80
   2 -14   3  135.49   12.70
   1 -14  -3   -5.00    6.90
  14   1  -3    2.70    5.70
  -1  14   3    0.40    5.00
   1 -14   3   -6.60    4.20
 -14  -1   3    2.40    3.70
  14   1   3   -0.40    3.50
  14   0  -3  216.08   17.40
   0 -14  -3  218.78   20.30
   0 -14   3  215.28   17.00
   0  14   3  211.98   17.30
 -14   0   3  214.18   15.90
  14   0   3  208.28   14.30
  14  -1  -3    0.60    5.70
  -1 -14   3   15.00    7.50
  14  -1   3   -4.00    3.20
 -14   1   3    3.10    3.40
  -2 -14  -3   16.30    9.40
  14  -2  -3    5.60    6.00
 -14   2   3    9.40    4.10
  14  -2   3    7.40    4.00
  -2 -14   3   17.80    5.80
  -3 -14  -3    2.50    8.50
  14  -3  -3    8.90    6.40
 -14   3   3    4.00    3.80
  -3 -14   3   12.80    6.30
  14  -3   3    5.10    3.70
  14  -4  -3  360.96   24.80
  -4 -14  -3  357.46   28.10
 -14   4   3  364.56   22.90
  14  -4   3  385.66   21.30
  -4 -14   3  383.76   24.30
  -5 -14  -3    0.70   10.10
  14  -5  -3    5.50    6.50
 -14   5   3    5.40    3.80
  14  -5   3    5.00    3.60
  -5 -14   3    2.50    4.20
  -6 -14  -3  305.57   26.90
  14  -6  -3  329.77   24.10
 -14   6   3  343.17   21.40
  -6 -14   3  351.56   24.10
  14  -6   3  341.47   19.40
  14  -7  -3    6.90    6.90
  14  -7   3    0.60    3.20
  -7 -14   3    9.10    5.30
   7  14   3    5.20    5.80
  14  -8  -3    0.70    6.20
  -8 -14   3    1.10    6.00
  14  -8   3   -1.60    3.20
   8  14   3    4.60    5.70
  14  -9  -3    2.30    7.00
  -9 -14   3    3.00    4.80
   9  14   3    7.00    6.40
  14  -9   3    9.10    4.10
  14 -10  -3   10.00    8.10
  10  14   3   11.80    6.30
 -10 -14   3    7.00    5.40
  14 -10   3   11.70    4.60
  14 -11  -3    7.30    8.50
  11  14   3    8.70    6.20
  14 -12  -3   -4.80    7.70
  12  14   3   -1.00    5.80
  14 -13  -3  -11.90    7.40
  13  14   3   -2.10    5.20
  14 -14  -3    7.80    9.50
  14  14   3   -1.60    6.10
  14 -15  -3    8.40   10.30
  15  14   3    3.50    7.30
  13 -15  -3    4.40    9.10
  15  13   3   -2.70    6.00
  12 -15  -3   -5.00    7.90
  15  12   3   -2.20    5.90
  11 -15  -3   -4.70    7.50
  15  11   3    6.30    6.00
  15  10  -3   -5.90    6.20
  10 -15  -3    8.00    8.40
  15  10   3    4.00    5.70
   9 -15  -3   -4.80    7.40
  15   9  -3   -0.20    5.80
  15   9   3    5.40    5.40
  15   8  -3   -2.30    5.30
   8 -15  -3   -6.30    7.00
  15   8   3    2.80    5.50
   7 -15  -3   17.50    8.70
  15   7  -3   13.40    6.60
  15   7   3   17.10    6.30
  15   6  -3    2.70    5.70
   6 -15  -3   -1.30    6.90
  15   6   3    0.70    4.70
 -15  -6   3    0.20    4.80
  -6  15   3    5.90    4.70
   5 -15  -3    3.20    7.10
  15   5  -3   -1.00    5.00
  15   5   3    0.90    4.40
  -5  15   3    1.30    3.90
 -15  -5   3    3.10    4.10
   4 -15  -3    1.70    7.20
  15   4  -3   -7.80    5.80
 -15  -4   3    3.90    4.30
  -4  15   3   -2.70    4.20
  15   4   3   -2.20    4.20
  15   3  -3   -3.20    5.50
   3 -15  -3   -2.10    7.40
  15   3   3    0.40    4.10
  -3  15   3    6.20    4.80
 -15  -3   3   -0.40    4.10
   3 -15   3   23.90    5.50
   2 -15  -3   -5.00    7.70
  15   2  -3    0.40    5.40
   2 -15   3   -0.60    3.70
 -15  -2   3   -0.80    3.50
  -2  15   3   -0.20    4.50
  15   2   3   -4.10    3.40
  15   1  -3    0.30    5.40
   1 -15  -3   -5.20    7.20
  -1  15   3    1.30    5.20
   1 -15   3    0.90    4.90
 -15  -1   3   -5.00    3.40
  15   1   3    1.20    3.90
  15   0  -3   26.80    8.10
   0 -15  -3    9.80    8.50
 -15   0   3   14.00    5.30
   0 -15   3   13.90    6.60
   0  15   3   17.30    6.40
  15   0   3   17.90    4.80
  -1 -15  -3   42.70   10.90
 -15   1   3   20.60    5.40
  -1 -15   3   47.40    9.50
  15  -1   3    8.40    4.40
  15  -2  -3   26.10    8.10
 -15   2   3   13.90    5.40
  15  -2   3   22.90    5.20
  -2 -15   3   22.10    7.70
  -3 -15  -3   24.00    9.90
  15  -3  -3   14.30    7.40
 -15   3   3   12.00    4.80
  15  -3   3   10.20    4.60
  15  -4  -3    6.80    6.90
  -4 -15  -3   14.90    9.30
  15  -4   3    1.70    3.80
  -4 -15   3    4.70    4.70
  15  -5  -3    5.50    6.70
  -5 -15  -3   -2.10    8.70
  -5 -15   3    0.60    4.40
  15  -5   3   -2.70    3.50
  15  -6  -3    6.60    6.90
  -6 -15   3    7.30    5.90
  15  -6   3    2.60    3.70
  15  -8  -3   17.30    7.90
   8  15   3    3.90    6.70
  15  -8   3    8.70    4.20
  -8 -15   3    1.70    6.90
  15  -9  -3    8.80    8.10
  -9 -15   3    7.50    6.80
   9  15   3   19.50    7.50
  15  -9   3   15.40    4.80
  15 -10  -3    4.00    8.20
  10  15   3    8.70    6.20
  15 -10   3    7.80    4.50
  15 -11  -3    5.30    8.70
  11  15   3    6.90    6.70
  15 -12  -3   -6.40    7.80
  12  15   3   -5.70    5.70
  15 -13  -3    1.30    8.60
  13  15   3   -3.80    5.60
  15 -14  -3   -3.60    8.50
  14  15   3   10.80    7.20
  15 -15  -3    8.50   10.20
  15  15   3   -0.80    6.90
  14 -16  -3   39.00   12.90
  16  14   3   44.90    9.40
  13 -16  -3    6.80    9.70
  16  13   3    4.10    6.40
  12 -16  -3  101.29   17.10
  16  12   3  129.59   14.00
  11 -16  -3    8.20    9.50
  16  11   3    2.70    5.80
  10 -16  -3   -0.20    8.40
  16  10   3    8.10    6.10
   9 -16  -3   12.50    8.40
  16   9  -3    5.50    6.30
  16   9   3   13.30    6.40
   8 -16  -3  230.98   22.00
  16   8  -3  202.18   18.50
  16   8   3  258.17   18.00
   7 -16  -3    0.60    7.40
  16   7  -3    7.40    6.30
  16   7   3    9.10    5.50
   6 -16  -3  104.39   15.10
  16   6  -3  110.69   13.70
  16   6   3  113.79   12.10
   5 -16  -3   -1.90    7.90
  16   5  -3   -1.10    5.90
  16   5   3    0.40    4.50
  16   4  -3   13.90    6.80
   4 -16  -3   16.80    9.40
  16   4   3   21.80    5.70
  -4  16   3   20.80    6.40
   3 -16  -3    0.50    8.60
  16   3  -3    5.60    6.20
  16   3   3    5.00    4.70
  -3  16   3    7.60    6.10
  16   2  -3   -1.80    5.30
   2 -16  -3    2.20    8.00
  16   2   3   -1.60    3.90
  -2  16   3    2.60    5.00
  16   1  -3   -3.40    5.50
   1 -16  -3    0.70    8.00
  16   1   3    1.80    4.00
   1 -16   3   -2.90    5.70
  -1  16   3    0.90    5.10
   0 -16  -3   49.30   11.80
  16   0  -3   60.89   10.20
   0 -16   3   50.59   10.20
  16   0   3   52.29    7.30
  16  -1  -3    3.20    6.10
  -1 -16  -3   17.90    9.60
  16  -1   3    5.60    4.20
  -1 -16   3    8.20    8.50
  16  -2  -3    8.10    6.80
  -2 -16  -3   13.10    9.50
  -2 -16   3   14.40    6.60
  16  -2   3   12.60    4.70
  -3 -16  -3    1.20    8.80
  16  -3  -3   11.00    6.80
  16  -3   3    8.80    4.40
  -3 -16   3    3.30    6.40
  16  -4  -3  342.97   24.50
  -4 -16  -3  334.47   26.90
  16  -4   3  327.37   19.90
  -4 -16   3  310.87   23.30
  16  -5  -3    5.60    6.90
  -5 -16  -3   21.20   10.00
  16  -5   3    8.20    4.30
  -5 -16   3    9.10    5.60
  16  -6  -3  192.78   18.70
   6  16   3  204.88   16.80
  16  -6   3  183.08   13.80
  16  -7  -3    7.20    7.40
   7  16   3    2.00    5.80
  16  -7   3   -1.00    3.90
  16  -8  -3   77.99   13.30
  16  -8   3   80.09    9.60
  16  -9  -3   -8.10    7.30
  16  -9   3    2.40    4.30
   9  16   3   -0.50    6.80
  16 -10  -3  153.68   19.70
  10  16   3  177.48   16.40
  16 -10   3  172.38   13.90
  16 -11  -3   -1.70    7.60
  11  16   3    2.10    6.40
  16 -12  -3   -0.30    8.40
  12  16   3   46.90    8.60
  16 -13  -3    2.30    8.80
  13  16   3   -3.10    5.80
  16 -14  -3   37.00   12.20
  14  16   3   32.50    9.00
  13 -17  -3   -6.20    8.90
  17  13   3    6.90    6.60
  12 -17  -3   -5.00    9.00
  17  12   3    3.90    6.40
  11 -17  -3    8.00    9.70
  17  11   3   13.40    6.90
  10 -17  -3   16.10   10.10
  17  10   3   17.90    7.30
  17   9  -3    4.30    6.50
   9 -17  -3   11.70    9.00
  17   9   3    6.70    6.10
   8 -17  -3    5.50    8.40
  17   8  -3   14.80    7.30
  17   8   3    8.30    6.10
   7 -17  -3   -3.90    8.30
  17   7   3   10.10    5.70
   6 -17  -3   -4.30    8.00
  17   6  -3    2.30    6.60
  17   6   3   -2.10    4.80
  17   5  -3   19.90    7.90
   5 -17  -3   34.50   10.10
  17   5   3   14.40    5.70
  17   4  -3    5.20    6.60
   4 -17  -3    6.60    8.60
  17   4   3   17.20    5.60
   3 -17  -3  -11.90    8.00
  17   3  -3    4.70    6.40
  17   3   3   -2.30    4.00
   2 -17  -3   -6.50    8.40
  17   2  -3    8.70    6.50
  -2  17   3    4.60    6.00
  17   2   3    3.60    4.40
   1 -17  -3  -14.70    7.50
  17   1  -3   -7.20    6.00
  -1  17   3    2.40    5.00
  17   1   3   -3.80    4.00
   0 -17  -3   -2.90    8.80
  17   0  -3   -1.10    6.80
  17   0   3    1.70    4.00
  -1 -17  -3   -4.90    9.10
  17  -1  -3   -2.40    6.20
  17  -1   3   -0.70    4.10
  -2 -17  -3   -9.70    8.70
  17  -2  -3   12.70    7.70
  17  -2   3    5.60    4.40
  17  -3  -3   12.30    7.50
  17  -3   3   14.80    4.90
  -4 -17  -3   -0.50   10.00
  17  -4  -3    3.40    7.10
  17  -4   3   -5.30    4.20
  17  -5  -3   -8.00    6.90
  -5 -17  -3   -0.20    9.80
  17  -5   3   -0.50    4.30
  17  -6  -3   -0.70    7.40
  17  -6   3    4.50    4.50
   6  17   3    6.20    7.00
  17  -7  -3   14.00    8.70
   7  17   3   18.80    7.20
  17  -7   3   10.00    5.00
  17  -8  -3   -3.90    7.30
  17  -8   3   -1.00    4.50
   8  17   3    5.60    6.90
  17  -9  -3    3.50    8.10
   9  17   3    5.90    6.70
  17  -9   3    2.10    4.70
  17 -10  -3   -7.30    7.50
  10  17   3   -1.80    6.10
  17 -10   3    5.70    5.50
  17 -11  -3    4.90    8.70
  11  17   3    1.80    6.90
  17 -12  -3    8.40    9.50
  12  17   3   10.90    7.10
  17 -13  -3   13.90    9.80
  13  17   3    9.40    7.40
  12 -18  -3   23.80   11.70
  18  12   3   30.70    8.10
  11 -18  -3    2.10    9.30
  18  11   3    2.80    5.70
  10 -18  -3    7.20    9.30
  18  10   3    5.50    6.10
  18   9  -3   11.90    7.50
   9 -18  -3   15.20   10.00
  18   9   3   11.20    6.40
   8 -18  -3  190.08   21.20
  18   8  -3  183.18   18.10
  18   8   3  195.98   16.10
   7 -18  -3    3.70    8.90
  18   7  -3    8.00    7.00
  18   7   3    2.60    5.40
  18   6  -3  134.09   15.50
   6 -18  -3  116.69   16.90
  18   6   3  136.69   13.50
   5 -18  -3    8.80    9.10
  18   5  -3    7.20    6.80
  18   5   3   11.50    5.90
   4 -18  -3   65.39   13.50
  18   4  -3   51.79   10.40
  18   4   3   80.19   10.50
   3 -18  -3    7.60    8.70
  18   3  -3    6.20    6.70
  18   3   3    7.20    5.00
   2 -18  -3  131.89   19.00
  18   2  -3  147.09   16.30
  18   2   3  169.48   13.50
   1 -18  -3   13.70    9.70
  18   1  -3   -2.80    6.40
  18   1   3    4.20    4.50
  18   0  -3   -1.20    6.60
   0 -18  -3   -6.30    8.80
  18   0   3    0.70    4.20
  -1 -18  -3   24.30    9.90
  18  -1  -3   -0.10    6.90
  18  -1   3    6.50    4.30
  -2 -18  -3   36.40   11.40
  18  -2  -3   20.00    8.50
  18  -2   3   24.20    6.20
  18  -3  -3   -6.20    7.10
  -3 -18  -3    4.10    9.40
  18  -3   3    4.40    4.40
  -4 -18  -3   17.10   11.60
  18  -4  -3   22.50    8.90
  18  -4   3    9.40    5.20
  18  -5  -3   -5.90    7.20
  18  -5   3    3.20    4.70
  18  -6  -3   -0.50    7.40
  18  -6   3   -0.90    4.40
   6  18   3   -4.00    6.40
  18  -7  -3    1.50    7.60
  18  -7   3    1.40    4.70
   7  18   3   -4.70    6.40
  18  -8  -3   15.10    9.10
  18  -8   3   11.10    5.60
   8  18   3   22.90    8.20
  18  -9  -3    0.90    8.50
   9  18   3   22.50    7.50
  18  -9   3    8.20    5.70
  18 -10  -3   48.50   12.60
  18 -10   3   57.49   12.40
  10  18   3   74.59   11.70
  18 -11  -3   -4.10    8.10
  11  18   3    1.60    6.70
  18 -12  -3    0.60    8.60
  12  18   3    2.90    6.80
  19  10   3    0.20    5.60
  19   9  -3    9.40    7.70
  19   9   3    8.80    6.10
  19   8  -3   12.20    7.70
  19   8   3    3.90    5.60
  19   7  -3   -0.40    6.90
  19   7   3   -3.90    4.90
   6 -19  -3   20.50   14.40
  19   6  -3   -2.20    7.10
  19   6   3    3.00    5.70
  19   5  -3   15.20    8.30
   5 -19  -3   26.30   14.10
  19   5   3   12.80    6.30
   4 -19  -3    1.80   10.10
  19   4  -3    7.90    7.60
  19   4   3    9.60    5.60
  19   3  -3   -3.90    6.40
   3 -19  -3    6.20    9.90
  19   3   3   -0.90    4.70
   2 -19  -3   -4.30    9.10
  19   2  -3    6.70    7.30
  19   2   3    3.00    4.90
   1 -19  -3   13.40   10.70
  19   1  -3   14.20    8.20
  19   1   3   12.40    5.20
  19   0  -3    7.70    7.80
   0 -19  -3   15.10   10.80
  19   0   3   10.30    5.20
  -1 -19  -3    9.60   10.60
  19  -1  -3   -0.20    7.20
  19  -1   3    0.40    4.60
  -2 -19  -3    5.90   10.10
  19  -2  -3    7.50    8.00
  19  -2   3    5.70    5.00
  -3 -19  -3    5.80   11.20
  19  -3  -3    7.80    8.20
  19  -3   3   -3.20    4.50
  -4 -19  -3    3.20   11.30
  19  -4  -3   -2.80    8.00
  19  -4   3   -0.40    4.80
  19  -5  -3   -6.40    7.30
  19  -5   3   -9.70    4.60
  19  -6  -3   -0.50    7.60
  19  -6   3   -0.50    4.80
  19  -7  -3  -10.10    7.10
  19  -7   3    8.00    5.40
  19  -8  -3    7.00    9.10
  19  -8   3    1.60    5.10
  19  -9  -3    3.80    8.50
  19  -9   3   -0.50    5.00
  19 -10  -3    8.50    8.90
  20   8  -3   -4.50    6.90
  20   8   3    4.20    5.80
  20   7  -3   13.80    8.20
  20   7   3    3.10    5.80
  20   6  -3    1.80    7.80
  20   6   3   -3.40    5.00
  20   5  -3   -6.30    7.10
  20   5   3    1.00    5.10
  20   4  -3   16.90    9.10
  20   4   3   22.70    6.80
  20   3  -3   15.90    8.40
  20   3   3    6.00    5.60
  20   2  -3  147.99   17.60
  20   2   3  145.39   13.80
  20   1  -3   -2.10    7.70
  20   1   3   -8.20    4.80
  20   0  -3    2.30    7.50
  20   0   3   -1.10    4.90
  20  -1  -3    1.50    7.70
  20  -1   3    6.00    5.40
  20  -2  -3  219.38   21.40
  20  -2   3  220.68   16.70
  20  -3  -3    7.40    8.60
  20  -3   3    5.40    5.50
  20  -4  -3   98.79   15.30
  20  -4   3  102.69   11.90
  20  -5  -3    1.60    8.00
  20  -5   3   -5.40    4.80
  20  -6  -3   -3.60    7.70
  20  -6   3   -3.90    5.10
  20  -7  -3   -8.70    7.80
  20  -7   3   -2.10    5.00
  20  -8  -3   21.20   10.10
  20  -8   3   16.20    6.60
  21   5  -3   -8.20    6.90
  21   5   3   -3.60    5.00
  21   4  -3   -2.30    7.30
  21   4   3   -5.20    4.90
  21   3  -3   15.80    8.10
  21   3   3    0.30    5.30
  21   2  -3   -0.50    7.80
  21   2   3    2.70    5.50
  21   1  -3   12.80    8.50
  21   1   3    6.80    6.30
  21   0  -3   13.10    9.10
  21   0   3   13.90    6.30
  21  -1  -3    2.90    8.60
  21  -1   3   10.70    6.10
  21  -2  -3   10.00    9.20
  21  -2   3    6.10    5.60
  21  -3  -3    5.50    8.90
  21  -3   3   -1.20    5.20
  21  -4  -3   11.80    9.80
  21  -4   3    2.00    5.60
  21  -5  -3    5.50    8.80
  21  -5   3    1.40    5.50
   0   0  -4   66.39    9.20
   1   0  -4   -4.90    4.10
  -1   0  -4   14.60    6.20
   0  -1  -4    0.50    5.50
   0   1  -4    0.50    4.80
   1   1  -4   71.19   10.00
   1  -1  -4   95.99   11.00
  -1   1  -4   99.19   11.90
  -1   2  -4  121.69   13.50
  -2  -1  -4  159.98   14.90
   1  -2  -4  183.48   14.60
   2   1  -4  129.79   12.30
   0  -2  -4   -6.10    6.10
  -2   1  -4   31.30    7.60
   2  -1  -4   26.00    6.40
  -1  -2  -4   20.40    7.40
  -3  -2  -4    4.50    6.50
  -2   3  -4    9.80    6.20
  -1   3  -4  281.77   17.90
  -3  -1  -4  300.67   19.90
   3   1  -4  213.48   16.60
   1  -3  -4  211.98   18.10
  -3  -1   4  221.88   13.50
   3   0  -4    1.50    5.00
  -3   0  -4   -2.80    6.30
   0  -3  -4    0.50    7.00
   0   3  -4    9.60    5.90
  -3   0   4    2.10    2.10
   1   3  -4 1039.60   55.09
   3  -1  -4 1054.79   55.89
  -1  -3  -4 1149.78   57.59
  -3   1  -4 1110.09   56.59
  -3   1   4 1066.99   53.09
   3  -2  -4   22.50    6.30
   2   3  -4   16.40    5.10
  -3   2  -4    8.10    6.20
  -2  -3  -4   19.60    7.40
  -3  -3  -4 1369.66   71.39
   3  -3  -4 1404.36   70.69
   3   3  -4 1352.46   68.89
  -3   3  -4 1333.57   69.69
  -3   3   4 1413.36   67.29
  -3  -3   4 1402.26   67.69
  -3   4  -4   24.80    6.80
  -4  -3  -4   14.40    7.80
   3  -4  -4   22.60    7.20
   4   3  -4   32.80    6.10
  -4  -3   4   31.40    5.10
  -3   4   4   22.50    3.60
  -4  -2  -4   26.40    8.20
  -2   4  -4    3.70    5.90
   4   2  -4   19.30    5.40
  -4  -2   4   18.90    3.60
  -2   4   4   19.70    3.40
  -1   4  -4   95.39   10.50
   1  -4  -4   95.99   13.40
  -4  -1  -4   83.79   12.30
   4   1  -4  111.29   11.10
  -4  -1   4   82.59    7.50
  -1   4   4   97.09    7.20
  -4   0  -4    6.30    6.30
   4   0  -4    7.90    5.00
   0  -4  -4   14.00    8.40
  -4   0   4    2.90    2.60
   1   4  -4   28.00    6.20
  -1  -4  -4   17.20    8.30
  -4   1  -4   25.50    7.80
   4  -1  -4   30.00    6.50
  -4   1   4   20.60    3.60
  -2  -4  -4   -9.20    5.50
   4  -2  -4   -0.20    5.20
   2   4  -4    9.30    4.70
  -4   2   4    1.80    2.40
   4  -3  -4   12.10    6.80
  -4  -4  -4  -10.30    5.90
   4  -4  -4   -7.30    5.40
   4   4  -4    0.50    4.20
  -4  -4   4    4.20    2.80
  -4   4   4   -4.70    2.10
   4  -4   4   -3.00    2.90
  -5  -4  -4   66.69   11.20
   5   4  -4   69.59    9.20
   4  -5   4   53.39    6.20
  -5  -4   4   61.49    7.20
  -4   5   4   58.29    6.20
   5   3  -4   45.70    6.40
   3  -5  -4   11.10    7.10
  -5  -3  -4   19.30    8.10
  -3   5   4   25.40    4.00
   3  -5   4   23.70    4.10
   5   2  -4    7.00    4.70
  -5  -2  -4    8.30    7.40
   2  -5  -4   11.00    6.30
  -2   5   4   11.90    3.10
  -5  -2   4   10.80    3.50
   1  -5  -4  312.67   22.50
  -1   5  -4  279.17   19.10
  -5  -1  -4  282.77   22.60
   5   1  -4  349.57   20.20
  -1   5   4  310.07   17.50
  -5  -1   4  350.16   18.10
   0   5  -4   33.20    6.70
  -5   0  -4   37.60    8.90
   5   0  -4   27.80    6.40
   0  -5  -4   25.60    9.30
   0   5   4   26.00    4.00
  -5   0   4   25.60    4.10
   5  -1  -4  183.78   15.30
  -5   1  -4  208.48   17.20
   1   5  -4  178.88   13.90
  -5   1   4  205.08   12.10
  -2  -5  -4  105.69   13.90
   5  -2  -4  108.79   12.10
   2   5  -4  119.59   10.00
   5  -2   4  106.89    8.90
  -2  -5   4  100.69    9.00
   2   5   4  132.29    8.80
  -5   2   4  102.09    8.20
   5  -3  -4   67.29    9.90
  -3  -5  -4   54.99   10.50
   3   5  -4   60.69    8.40
  -3  -5   4   62.59    7.20
  -5   3   4   60.29    6.20
   5  -3   4   62.19    7.00
   4   5  -4   17.40    4.90
   5  -4  -4    9.20    6.60
  -4  -5   4   18.80    4.20
  -5   4   4   15.70    3.50
   5  -5  -4  461.85   30.90
   5   5  -4  623.24   29.20
  -5  -5  -4  490.35   32.70
   5  -5   4  475.35   26.50
  -5   5   4  525.45   27.50
  -6  -5  -4   13.90    9.00
   5  -6  -4   15.80    7.10
   5  -6   4    8.40    2.80
  -5   6   4    7.80    3.30
  -6  -5   4    3.40    3.50
  -6  -4  -4   -1.00    8.50
   4  -6  -4    3.60    6.30
   6   4  -4   25.20    5.60
   4  -6   4    7.60    2.80
  -4   6   4    3.60    3.00
  -6  -4   4    7.60    4.40
   6   3  -4  224.08   15.70
  -6  -3  -4  194.08   19.70
   3  -6  -4  198.58   18.10
   3  -6   4  200.98   12.10
  -6  -3   4  223.18   14.30
  -3   6   4  206.08   13.10
   1  -6  -4   -4.50    7.10
  -1   6  -4   -3.30    4.30
  -6  -1  -4    9.10    7.60
   6   1  -4   -9.90    4.40
  -6  -1   4   -1.70    2.40
  -1   6   4    0.20    2.60
   0   6  -4    5.40    4.30
   6   0  -4   -2.80    4.30
   0  -6  -4   -6.80    7.60
  -6   0   4    3.00    2.80
   6   0   4   -8.40    3.60
   0   6   4   -2.00    2.80
  -1  -6  -4  129.49   14.90
  -1  -6  -4  112.99    8.70
   6  -1  -4   94.29   12.10
   1   6  -4  134.29   11.30
  -6   1   4  123.59    9.10
  -1  -6   4  141.49    9.60
   1   6   4  124.59    9.30
   6  -1   4  106.49    9.80
   2   6  -4    6.80    4.10
  -2  -6  -4   -5.10    6.60
   6  -2  -4   10.20    5.50
   2   6   4    4.00    3.40
  -6   2   4    1.00    2.40
  -2  -6   4    2.40    3.30
   6  -2   4    3.60    3.30
   6  -3  -4    2.90    5.20
   3   6  -4   -5.40    4.20
  -3  -6  -4   24.50    8.20
   6  -3   4    6.10    3.40
  -3  -6   4   10.00    3.50
  -6   3   4   -1.00    2.50
   4   6  -4   -3.80    3.70
  -4  -6  -4   16.30    8.00
   6  -4  -4   18.50    6.80
  -4  -6   4    8.00    3.70
   6  -4   4   -1.20    3.00
   5   6  -4   69.79    8.20
  -5  -6  -4   73.89   12.30
  -6   5   4   76.89    7.50
   6  -5   4   62.59    6.90
  -5  -6   4   69.59    8.40
  -6  -6  -4   -2.80    7.80
   6  -6  -4   -8.50    6.60
  -6  -6   4    4.40    3.70
  -6   6   4    1.30    2.80
   6  -6   4    2.50    2.70
  -7  -6  -4   21.40    9.70
   6  -7  -4   15.10    7.50
  -6   7   4   16.00    4.10
  -7  -6   4   22.50    4.90
   6  -7   4    7.90    2.90
   5  -7  -4 1228.08   64.89
   7   5  -4 1272.17   62.39
  -7  -5  -4 1190.48   65.99
  -5   7   4 1229.88   61.29
  -7  -5   4 1227.38   62.39
   5  -7   4 1206.98   59.49
  -7  -4  -4   68.79   12.90
   7   4  -4   68.59    8.90
   4  -7  -4   54.09    9.60
  -4   7   4   59.19    7.20
   4  -7   4   52.69    5.60
   3  -7  -4  460.55   29.40
   7   3  -4  498.15   27.60
  -7  -3   4  490.35   26.50
   3  -7   4  455.35   23.50
  -3   7   4  469.45   25.40
   7   3   4  426.56   26.00
   7   2  -4   26.10    6.40
   2  -7   4   23.10    3.40
   7   2   4   13.60    5.20
  -7  -2   4   21.60    4.60
   7   1  -4  560.54   32.60
   1  -7  -4  548.45   35.10
   7   1   4  519.35   30.90
   1  -7   4  669.03   30.00
  -1   7   4  566.64   30.50
  -7  -1   4  584.64   30.90
   0   7  -4   70.79    7.90
   7   0  -4   79.79   11.10
   7   0   4   76.99    8.80
  -7   0   4   88.39    7.90
   0  -7   4   88.49    7.90
   0  -7   4   74.19    8.10
   1   7  -4  581.34   30.50
  -1  -7  -4  571.04   35.80
  -1  -7  -4  553.04   30.30
   7  -1  -4  547.45   33.20
   7  -1   4  615.34   31.10
  -1  -7   4  594.04   30.90
  -7   1   4  600.84   31.10
   1   7   4  589.84   31.00
  -2  -7  -4    8.10    3.10
  -2  -7  -4   -7.30    6.50
   7  -2  -4   -1.90    5.80
  -2  -7   4    9.70    3.80
  -7   2   4   -4.00    2.40
   7  -2   4    4.40    3.40
   2   7   4    4.10    3.60
  -3  -7  -4    6.00    3.20
  -3  -7  -4   -6.30    7.10
   3   7  -4   10.40    4.20
   7  -3  -4    4.20    5.80
  -7   3   4    3.90    2.90
   7  -3   4    5.60    3.50
  -3  -7   4   -0.20    3.80
   7  -4  -4   89.39   12.20
  -4  -7  -4   67.79   11.90
   4   7  -4   66.19    7.60
  -4  -7   4   67.59    8.50
   7  -4   4   69.89    7.00
  -7   4   4   55.69    6.90
   7  -5  -4    4.90    6.00
   5   7  -4    6.50    3.90
   7  -5   4    3.20    2.90
  -5  -7   4    1.00    3.60
  -7   5   4    1.20    2.80
   7  -6  -4   56.89   10.50
  -6  -7  -4   44.30   11.80
   7  -6   4   50.19    5.40
  -7   6   4   50.89    6.80
   7  -7  -4   99.79   14.00
   7   7  -4   94.49   10.60
  -7  -7  -4  103.29   15.00
   7  -7   4   94.59    7.10
  -7   7   4   96.69    8.90
  -7  -7   4  111.69   10.40
   7  -8  -4    9.60    7.30
   8   7  -4   10.50    4.60
   8   7   4    0.50    4.40
  -8  -7   4    5.10    4.10
  -7   8   4    3.20    3.30
   7  -8   4    1.40    2.40
   7  -8   4    2.70    2.70
   8   6  -4   10.90    4.70
   6  -8  -4    7.60    7.10
  -6   8   4    5.20    3.00
   8   6   4   -5.10    4.10
  -8  -6   4    2.30    3.60
   6  -8   4   -3.10    2.20
   5  -8  -4   10.40    7.90
   5  -8   4   19.10    2.70
  -8  -5   4   11.80    5.20
   8   5   4   14.40    3.40
  -5   8   4   13.60    4.00
   8   5   4   19.70    5.40
   8   4  -4   15.90    5.80
   4  -8  -4    6.60    7.30
   8   4   4   12.80    4.80
   4  -8   4   13.20    2.40
  -4   8   4   16.40    4.10
  -8  -4   4    9.50    4.70
   3  -8  -4   95.99   13.40
   8   3  -4  106.59   11.80
   8   3   4   73.69    9.30
  -3   8   4   77.59    8.50
  -8  -3   4   88.99    9.00
   8   2  -4    0.70    5.00
   2  -8  -4    0.30    7.20
   8   2   4    1.20    4.00
   2  -8   4    0.80    2.80
  -8  -2   4    5.50    3.50
  -2   8   4   -7.00    3.40
   1  -8  -4   24.00   10.50
   8   1  -4   27.00    6.70
   1  -8   4   16.90    4.20
   1  -8   4   24.50    5.70
  -1   8   4   29.60    5.30
   0  -8  -4   -8.50    8.30
   8   0  -4   10.80    5.70
   0   8   4    8.40    3.60
  -8   0   4    8.70    3.40
   8   0   4    6.50    4.10
   8  -1  -4   65.29   10.20
  -1  -8  -4  105.79    9.10
  -1  -8  -4   77.59   13.10
  -1  -8   4   99.99    8.80
   8  -1   4  110.59    9.40
  -1  -8   4  103.09    9.10
   1   8   4   90.09    9.30
  -8   1   4   81.49    8.40
  -2  -8  -4   -0.10    7.30
   8  -2  -4    1.00    5.80
  -2  -8  -4    5.50    3.20
   2   8   4   -5.40    3.70
   8  -2   4   21.00    4.40
  -2  -8   4   10.00    3.90
  -3  -8  -4   20.00    5.70
  -3  -8  -4   23.70    8.70
  -3  -8   4   20.60    5.00
  -8   3   4   16.50    4.10
   8  -4  -4   -8.50    5.40
  -4  -8  -4    3.80    8.40
  -4  -8   4    3.60    3.70
  -8   4   4    0.20    2.80
  -5  -8  -4   17.30    8.80
   8  -5  -4   -4.20    6.00
  -8   5   4    4.90    3.40
   8  -5   4   10.70    3.40
  -5  -8   4   15.40    4.50
   8  -6  -4    5.80    5.80
  -6  -8  -4   -7.20    7.90
   6   8  -4   -1.40    3.80
  -6  -8   4    0.60    3.70
  -8   6   4   -3.60    2.90
  -7  -8  -4   11.00    9.10
   8  -7  -4   -5.30    5.40
   7   8  -4    4.20    3.90
  -8   7   4    0.00    2.90
   8  -7   4    1.90    2.30
  -7  -8   4    2.20    3.80
   8  -8  -4   -1.00    6.70
   8   8  -4   10.50    4.40
  -8   8   4    4.30    3.20
   8  -8   4   -0.40    2.10
  -8  -8   4   -0.80    3.60
   8   8   4   -5.00    4.60
   9   8  -4    9.00    4.50
  -9  -8   4    4.00    3.70
   8  -9   4   -2.50    2.10
   9   8   4   -6.00    4.10
  -8   9   4   19.70    4.40
   9   7  -4   30.00    6.30
   7  -9  -4   26.40    8.80
  -9  -7   4   23.10    5.80
  -7   9   4   21.50    5.00
   9   7   4   20.10    6.00
   9   6  -4   16.20    5.50
  -9  -6   4   20.80    5.90
  -6   9   4   25.80    4.80
   9   6   4   18.90    5.70
   9   5  -4  317.57   21.60
   5  -9  -4  327.17   24.80
  -9  -5   4  361.46   22.00
   9   5   4  332.27   19.70
   5  -9   4  352.96   19.00
   9   5   4  352.26   21.60
  -5   9   4  343.57   20.30
   4  -9  -4    6.60    7.50
   9   4  -4   17.50    6.50
   4  -9   4   17.60    3.50
   9   4   4   18.00    5.20
  -9  -4   4   13.80    5.20
   9   4   4   18.20    3.90
  -4   9   4   15.80    4.60
   3  -9  -4   94.79   13.00
   9   3  -4  146.59   13.20
   3  -9   4   83.59    8.50
  -9  -3   4  110.19   10.00
   3  -9   4   93.69    8.40
   9   3   4   92.49    9.90
  -3   9   4  112.89    9.40
   9   3   4  104.19    8.10
   9   2  -4    1.00    5.40
   2  -9  -4    0.50    7.60
  -2   9   4    4.30    3.80
  -9  -2   4    3.50    3.40
   2  -9   4   -4.90    3.30
   2  -9   4   -1.70    3.00
   9   2   4    2.60    3.80
   9   1  -4  333.27   22.50
   9   1   4  333.67   20.10
  -9  -1   4  360.76   20.60
   1  -9   4  331.47   20.30
   1  -9   4  337.17   19.50
   9   0  -4   -2.10    5.70
   0  -9  -4   -1.80    9.10
   9   0   4    0.00    3.80
  -9   0   4    5.20    3.30
   0  -9   4    8.00    3.90
   0  -9   4    7.10    4.10
   0   9   4    1.10    3.50
   9  -1  -4  422.96   27.50
  -1  -9  -4  456.35   30.80
  -1  -9   4  464.05   24.80
  -1  -9   4  451.15   25.10
   9  -1   4  420.26   24.60
  -9   1   4  451.85   25.20
   1   9   4  445.06   25.50
   9  -2  -4   38.10    8.20
  -2  -9  -4   26.40    9.70
   9  -2   4   39.10    5.70
   2   9   4   48.30    7.40
  -2  -9   4   31.40    5.70
  -9   2   4   32.30    5.70
  -3  -9  -4  161.98   18.20
   9  -3  -4  131.39   15.30
  -9   3   4  156.98   11.60
   9  -3   4  166.18   11.30
   9  -4  -4   63.69   10.60
  -9   4   4   57.99    7.40
  -4  -9   4   62.19    8.40
   9  -4   4   64.09    7.20
   9  -5  -4  600.14   36.30
  -5  -9  -4  607.64   38.50
  -5  -9   4  649.74   34.60
   9  -5   4  599.44   31.90
  -9   5   4  638.64   33.40
   9  -6  -4   22.60    7.70
  -6  -9  -4   27.60   10.30
  -9   6   4   22.70    4.80
   9  -6   4   27.80    4.10
  -6  -9   4   20.80    5.70
  -7  -9  -4  138.59   18.60
   9  -7  -4  128.89   15.10
  -9   7   4  132.49   10.90
  -7  -9   4  138.99   12.40
   9  -7   4  133.49    9.10
   9  -8  -4    5.30    6.40
   8   9   4   -3.90    4.70
  -9   8   4    0.40    3.20
  -8  -9   4    0.60    3.80
   9  -8   4    4.30    2.40
   9  -9  -4    2.20    6.80
  -9  -9   4    0.30    3.80
  -9   9   4   -2.20    2.90
   9   9   4   -5.50    4.40
   9  -9   4    4.40    2.50
   9 -10  -4    9.80    8.40
  10   9   4   11.80    5.90
  -9  10   4    7.50    4.30
 -10  -9   4   10.60    4.90
  10   8  -4    3.70    4.40
   8 -10  -4   -2.70    7.00
 -10  -8   4   -2.80    3.40
  10   8   4   -1.00    4.70
  -8  10   4   -1.70    3.10
   7 -10  -4    2.70    7.30
  10   7  -4    0.70    4.50
  -7  10   4    2.40    3.40
  10   7   4    7.10    5.20
 -10  -7   4    1.40    4.30
  10   6  -4   15.80    6.40
   6 -10  -4   18.10    8.00
  -6  10   4   14.00    4.50
  10   6   4   14.40    5.70
 -10  -6   4   23.50    6.80
   5 -10  -4   -5.10    6.40
  10   5  -4    9.20    5.80
  10   5   4    3.60    4.50
 -10  -5   4   13.00    4.60
  -5  10   4    9.70    4.00
  10   4  -4   -4.60    5.10
   4 -10  -4   -7.20    5.90
 -10  -4   4   -0.50    3.10
  10   4   4   -0.60    3.70
  -4  10   4    1.50    3.10
  10   3  -4   -7.20    4.90
   3 -10  -4    1.10    6.50
  -3  10   4    1.50    3.20
  10   3   4   -2.90    3.40
 -10  -3   4   -2.00    3.00
  10   3   4    1.00    2.60
   3 -10   4   -1.40    3.10
  10   2  -4    1.90    5.40
 -10  -2   4    0.40    3.10
   2 -10   4   -9.80    4.80
  10   2   4   -2.40    3.60
  10   2   4   -0.80    2.30
  -2  10   4    7.80    3.80
   1 -10  -4   33.10   10.90
  10   1  -4   24.80    7.60
 -10  -1   4   25.40    5.30
  -1  10   4   22.40    5.40
   1 -10   4   22.70    5.70
  10   1   4   24.30    5.40
  10   0  -4    7.00    5.60
   0 -10  -4    7.20    8.20
   0  10   4   13.00    4.10
  10   0   4    1.10    3.80
 -10   0   4    0.30    3.30
   0 -10   4   -0.50    4.00
  10  -1  -4   -4.40    5.70
  -1 -10  -4    5.30    8.00
 -10   1   4    0.10    3.10
  10  -1   4   -7.80    3.10
   1  10   4   -1.20    4.20
  10  -2  -4  -12.80    5.00
  -2 -10  -4   -8.30    6.80
  -2 -10   4   -1.50    3.20
 -10   2   4   -2.20    2.90
  10  -2   4    3.00    3.60
   2  10   4   -5.00    3.80
  10  -3  -4   50.49    9.10
  -3 -10  -4   53.19   11.00
  10  -3   4   52.89    7.20
 -10   3   4   48.40    7.00
  -3 -10   4   54.79    8.00
  10  -4  -4   -2.60    5.30
  -4 -10  -4    8.00    8.00
  10  -4   4    1.50    3.00
 -10   4   4    0.70    3.20
  -4 -10   4    4.80    4.20
  -5 -10  -4    9.80    8.60
  10  -5  -4    3.70    6.90
 -10   5   4    2.20    3.00
  -5 -10   4    7.50    4.80
  10  -5   4    4.10    3.00
  10  -6  -4   -0.40    6.80
  -6 -10  -4   -5.60    8.80
 -10   6   4    0.50    3.10
  10  -6   4    0.20    2.60
  -6 -10   4    0.20    3.70
  10  -7  -4   12.60    8.00
  -7 -10  -4   27.30   10.50
  -7 -10   4   15.30    5.40
  10  -7   4   18.40    3.70
 -10   7   4   15.60    4.80
  10  -8  -4   20.20    8.20
 -10   8   4   10.60    4.30
   8  10   4    1.20    5.60
  -8 -10   4   13.90    5.10
  10  -8   4    7.20    3.00
  10  -9  -4    0.00    6.90
  10  -9   4   -2.20    2.40
 -10   9   4   -3.20    2.90
  -9 -10   4    3.50    4.20
   9  10   4   -9.20    4.80
  10 -10  -4    9.20    7.80
 -10 -10   4    3.90    4.50
  10  10   4    3.60    5.70
 -10  10   4   -0.60    3.60
  10 -11  -4   -6.60    7.50
 -10  11   4   -0.50    3.50
  11  10   4    6.00    5.80
 -11 -10   4    0.20    4.30
   9 -11  -4   25.50    9.50
  -9  11   4   20.50    5.70
 -11  -9   4   30.30    7.10
  11   9   4   33.80    7.50
  11   8  -4    5.40    5.60
   8 -11  -4   11.00    8.20
 -11  -8   4    4.40    5.00
  -8  11   4    8.80    4.60
  11   8   4   15.30    6.00
   7 -11  -4  157.18   17.50
 -11  -7   4  155.58   14.60
  11   7   4  151.18   13.30
  -7  11   4  140.09   12.20
   6 -11  -4   32.40    9.70
  11   6  -4   29.50    7.80
 -11  -6   4   52.69    9.10
  -6  11   4   37.10    6.30
  11   6   4   36.50    6.90
  11   5  -4  101.59   13.50
   5 -11  -4  114.89   16.10
  -5  11   4  140.89   11.70
  11   5   4  150.28   12.70
 -11  -5   4  155.98   13.10
  11   4  -4   12.20    7.00
   4 -11  -4    5.80    7.60
  -4  11   4   20.60    5.20
  11   4   4   14.60    5.20
 -11  -4   4   18.40    5.00
   3 -11  -4   -5.90    7.30
  11   3  -4    5.60    6.60
  -3  11   4    9.30    4.50
   3 -11   4   14.80    4.50
 -11  -3   4   13.40    4.60
  11   3   4    5.10    4.40
   2 -11  -4   17.00    9.50
  11   2  -4   23.50    7.60
   2 -11   4   20.30    5.80
  -2  11   4   21.10    5.20
 -11  -2   4   26.10    5.60
  11   2   4   20.50    5.20
  11   1  -4   -0.50    5.80
   1 -11  -4    0.80    7.30
  -1  11   4    5.60    3.90
 -11  -1   4    5.30    3.60
   1 -11   4    5.00    4.70
  11   1   4   -0.20    3.50
  11   0  -4   14.40    6.90
  11   0   4   13.50    3.80
  11   0   4    9.70    4.30
   0  11   4   17.30    5.30
   0 -11   4    8.40    4.90
 -11   0   4   10.60    4.20
  -1 -11  -4   -6.20    6.70
  11  -1  -4   -3.10    5.30
 -11   1   4   -1.90    2.80
  11  -1   4   -2.00    3.40
   1  11   4    0.70    4.00
  -1 -11   4    2.20    4.10
  11  -2  -4    0.60    5.70
  -2 -11  -4   -3.60    7.10
 -11   2   4   -1.30    2.80
  -2 -11   4    1.80    3.40
  11  -2   4    0.00    3.30
  -3 -11  -4   49.20   10.90
  11  -3  -4   29.00    8.30
 -11   3   4   26.70    5.60
  -3 -11   4   40.40    6.80
  11  -3   4   34.90    5.50
  11  -4  -4   -8.70    5.60
  -4 -11  -4   30.30    9.50
  -4 -11   4   -2.40    4.40
 -11   4   4   -1.20    3.00
  11  -4   4    3.60    3.20
  -5 -11  -4  380.76   28.00
  11  -5  -4  355.56   24.70
  11  -5   4  365.76   19.90
 -11   5   4  350.76   21.40
  -5 -11   4  323.67   22.70
  -6 -11  -4    3.30    9.40
  11  -6  -4   10.70    7.10
  11  -6   4    0.90    2.90
 -11   6   4    2.60    3.20
  -6 -11   4    4.50    4.50
  11  -7  -4  109.89   15.00
  -7 -11  -4  134.19   17.80
  -7 -11   4  132.39   12.90
  11  -7   4  128.19    9.40
 -11   7   4  117.29   10.90
  11  -8  -4   33.50    9.90
   8  11   4   30.40    7.90
  -8 -11   4   33.40    7.40
 -11   8   4   33.50    6.30
  11  -8   4   32.00    4.60
  11  -9  -4   53.99   11.20
   9  11   4   50.29    9.30
 -11   9   4   59.09    8.30
  -9 -11   4   70.79   10.20
  11  -9   4   52.29    6.50
  11 -10  -4   12.50    8.20
  10  11   4   15.70    7.00
 -10 -11   4   14.00    5.80
 -11  10   4    9.00    4.50
  11 -11  -4  180.88   20.00
 -11  11   4  174.08   14.80
  11  11   4  210.98   17.10
  11 -12  -4   18.30    9.60
  12  11   4   13.70    6.70
  10 -12  -4   -1.50    7.80
  12  10   4   16.70    6.70
 -10  12   4    1.70    4.00
 -12 -10   4    1.40    5.70
   9 -12  -4    5.30    8.50
 -12  -9   4   10.90    6.10
  -9  12   4    9.30    4.60
  12   9   4   31.80    7.30
   8 -12  -4    2.30    7.80
  12   8   4   22.10    6.60
 -12  -8   4    4.80    5.70
  -8  12   4    6.60    4.30
  12   7  -4   -6.70    4.40
   7 -12  -4    1.00    7.80
  12   7   4   14.00    5.90
  -7  12   4    3.60    4.20
 -12  -7   4    4.00    5.40
  12   6  -4   24.90    6.80
   6 -12  -4    5.80    7.30
  12   6   4    4.40    5.20
  -6  12   4    6.10    4.40
 -12  -6   4    8.20    4.80
   5 -12  -4   22.10    8.90
  12   5  -4   14.20    7.70
  12   5   4   39.20    7.10
  -5  12   4   28.80    6.20
 -12  -5   4   22.00    6.00
   4 -12  -4    9.20    7.80
  12   4  -4    0.30    6.20
 -12  -4   4    6.70    4.00
  12   4   4   11.70    4.80
   3 -12  -4   -6.00    7.10
  12   3  -4   -9.40    5.20
  -3  12   4   -2.20    3.50
   3 -12   4   -0.20    3.40
  12   3   4    8.00    4.10
 -12  -3   4    0.10    3.30
   2 -12  -4   -6.80    7.50
  12   2  -4   -3.70    5.60
  12   2   4   -3.20    3.40
   2 -12   4   -3.70    3.40
 -12  -2   4   -2.20    3.00
  -2  12   4    1.10    4.00
  12   1  -4   -2.60    5.70
   1 -12  -4    0.20    8.00
  12   1   4    3.50    4.10
 -12  -1   4   -0.40    3.30
   1 -12   4    1.20    4.50
  -1  12   4   -2.70    4.00
  12   0  -4   -6.80    5.90
   0 -12  -4    5.60    7.90
 -12   0   4    1.70    3.60
   0  12   4   -0.10    4.20
  12   0   4   -1.20    3.60
   0 -12   4   -3.50    3.90
  -1 -12  -4   48.60   10.10
  -1 -12   4    7.90    4.60
  -2 -12  -4   -5.10    7.70
  -2 -12   4    6.70    3.90
  12  -2   4   -3.20    3.40
 -12   2   4   -0.50    3.10
  12  -3  -4   -2.30    5.90
  -3 -12  -4  -15.80    6.90
 -12   3   4   -1.30    3.00
  12  -3   4   -1.20    3.10
  -3 -12   4    1.70    3.70
  12  -4  -4   -3.80    5.60
  -4 -12  -4   -9.40    8.20
  -4 -12   4   -5.50    4.20
 -12   4   4   -2.80    2.80
  12  -4   4    0.00    3.20
  -5 -12  -4  -20.70    8.10
  12  -5  -4   -2.80    6.20
  12  -5   4    1.30    3.20
 -12   5   4   -0.80    3.20
  -5 -12   4    1.70    4.60
  -6 -12  -4    5.10    9.90
  12  -6  -4   -4.60    6.20
  12  -6   4    0.10    3.00
  -6 -12   4    1.70    5.40
 -12   6   4    1.20    3.40
  -7 -12  -4    2.90   10.00
  12  -7  -4   17.00    7.80
 -12   7   4    8.60    4.10
  -7 -12   4    2.80    4.40
  12  -7   4    0.50    3.00
  12  -8  -4    1.70    7.60
 -12   8   4    1.70    3.40
  -8 -12   4   -0.80    3.90
   8  12   4    3.60    6.10
  12  -8   4    0.10    3.00
  12  -9  -4    2.80    7.50
  12  -9   4    0.40    3.20
 -12   9   4    5.80    4.10
   9  12   4   -1.20    6.10
  -9 -12   4    4.10    6.10
  12 -10  -4    0.60    7.70
  10  12   4   -2.90    6.10
 -12  10   4    1.30    3.90
  12 -11  -4    0.10    7.70
  11  12   4   14.70    6.80
  12 -12  -4   -1.90    8.00
  12  12   4    5.70    6.40
  12 -13  -4   -4.30    8.90
  13  12   4   -0.60    5.90
  11 -13  -4   13.70    9.10
  13  11   4   14.90    7.10
  10 -13  -4    0.10    8.30
  13  10   4   -4.80    5.60
   9 -13  -4    8.10    9.30
 -13  -9   4   34.60   11.70
  13   9   4   10.50    6.60
  -9  13   4    9.90    4.70
  13   8  -4   -6.50    4.40
   8 -13  -4   -2.60    7.90
  13   8   4    6.10    5.60
 -13  -8   4    0.30    5.00
  -8  13   4    3.40    4.20
   7 -13  -4  216.58   21.70
  -7  13   4  267.97   18.30
 -13  -7   4  249.38   18.90
  13   7   4  242.98   17.80
   6 -13  -4   -2.60    6.80
  13   6  -4    5.30    5.90
  -6  13   4    4.60    4.20
 -13  -6   4   -2.60    3.90
  13   6   4    7.30    4.90
  13   5  -4  301.07   23.60
   5 -13  -4  340.37   26.70
  -5  13   4  401.46   23.50
 -13  -5   4  363.26   23.50
  13   5   4  376.26   22.60
   4 -13  -4   -8.40    7.20
  13   4  -4    4.90    6.40
  13   4   4    0.90    4.60
 -13  -4   4   -0.50    3.80
  -4  13   4    7.60    4.40
   4 -13   4    2.50    4.80
  13   3  -4   -6.50    5.60
   3 -13  -4   -5.80    7.90
   3 -13   4   -3.50    3.80
  13   3   4    3.30    4.40
 -13  -3   4    1.00    3.60
  -3  13   4   -3.80    3.70
  13   2  -4    0.20    6.10
   2 -13  -4   -8.80    7.20
   2 -13   4    3.30    4.40
  -2  13   4   -4.40    3.70
  13   2   4    1.20    4.30
 -13  -2   4    3.80    3.70
   1 -13  -4  181.38   20.20
  13   1  -4  160.48   16.70
  -1  13   4  178.28   14.90
   1 -13   4  165.88   14.60
 -13  -1   4  168.68   13.90
  13   1   4  195.28   13.80
   0 -13  -4   17.20    9.10
  13   0  -4   -0.30    7.20
  13   0   4    6.10    4.70
   0 -13   4    8.20    5.60
   0  13   4    8.40    5.30
 -13   0   4   13.20    4.60
  13  -1  -4   50.79   10.70
  -1 -13  -4   68.39   13.00
 -13   1   4   75.59    8.80
  13  -1   4   61.29    8.90
   1  13   4   79.19   10.60
  -1 -13   4   82.09   10.80
  -2 -13  -4    9.50    8.80
  13  -2  -4   -5.40    6.30
  13  -2   4    4.30    4.10
  -2 -13   4    4.20    4.50
 -13   2   4    6.70    3.90
  13  -3  -4    9.00    7.60
  -3 -13  -4   14.60   10.00
 -13   3   4   19.30    5.30
  13  -3   4   17.00    4.80
  -3 -13   4   22.40    5.50
  13  -4  -4   38.70    9.40
  -4 -13  -4   21.70   11.20
 -13   4   4   30.60    6.00
  13  -4   4   37.00    5.70
  -4 -13   4   45.20    8.30
  13  -5  -4   52.99   10.40
  -5 -13  -4   36.50   12.70
  13  -5   4   59.69    7.60
 -13   5   4   51.19    7.70
  -5 -13   4   69.59   10.10
  -6 -13  -4   11.40   10.90
  13  -6  -4   24.70    9.00
  13  -6   4   26.40    4.90
 -13   6   4   19.20    5.10
  -6 -13   4   35.00    8.30
  -7 -13  -4   11.70   10.30
  13  -7  -4    4.90    7.90
 -13   7   4   13.50    4.70
  13  -7   4   12.20    4.00
  13  -8  -4   16.20    9.00
  13  -8   4    2.80    3.40
   8  13   4   -0.40    6.20
 -13   8   4    0.20    3.80
  13  -9  -4    6.00    8.30
 -13   9   4   10.30    4.90
   9  13   4   15.50    7.30
  13  -9   4    6.30    3.90
  13 -10  -4    3.60    7.90
  10  13   4    4.60    6.40
  13 -11  -4   -2.10    8.20
  11  13   4   12.80    7.20
  13 -12  -4    1.90    8.80
  12  13   4    3.30    6.50
  13 -13  -4    3.50    9.20
  13  13   4    1.70    6.40
  13 -14  -4   -6.10    8.70
  14  13   4    1.10    6.20
  12 -14  -4   -1.10    8.00
  14  12   4   -2.70    5.60
  11 -14  -4    9.40    9.30
  14  11   4    8.30    6.30
  10 -14  -4   -2.60    8.00
  14  10   4   -4.30    5.40
   9 -14  -4   -2.30    8.00
  14   9   4    0.90    5.70
   8 -14  -4   -0.60    8.50
  14   8  -4   -5.60    5.00
  14   8   4   13.60    6.30
  -8  14   4   10.00    5.40
  14   7  -4    8.70    6.50
   7 -14  -4   18.90    9.50
 -14  -7   4   14.20    5.80
  -7  14   4   14.30    5.60
  14   7   4   10.10    6.20
   6 -14  -4    1.00    7.90
  14   6  -4   25.70    7.50
 -14  -6   4   -0.30    4.40
  -6  14   4    3.90    4.80
  14   6   4    1.00    4.90
   5 -14  -4   -5.70    7.40
  14   5  -4    0.40    6.20
  14   5   4    4.60    5.10
 -14  -5   4   -0.10    4.10
  -5  14   4    6.00    4.30
  14   4  -4   -3.90    5.70
   4 -14  -4   -5.40    8.00
 -14  -4   4   -3.20    3.50
  -4  14   4    6.60    4.80
  14   4   4    4.90    4.90
   3 -14  -4    8.40    9.40
  14   3  -4    7.90    6.70
  14   3   4   16.90    5.60
 -14  -3   4    9.00    5.00
  -3  14   4    9.50    5.20
  14   2  -4   -1.20    6.60
   2 -14  -4   -8.30    8.20
  14   2   4   -1.20    4.50
 -14  -2   4   -1.80    3.50
  -2  14   4   -0.50    4.50
   1 -14  -4    6.50    8.80
  14   1  -4    2.50    6.90
 -14  -1   4    3.60    4.40
  14   1   4    4.00    4.50
  -1  14   4    5.60    5.40
  14   0  -4  -10.50    6.60
   0 -14  -4    7.00    8.70
   0  14   4    4.70    5.30
  14   0   4   -0.50    4.00
 -14   0   4   -2.50    3.50
  -1 -14  -4   14.80    8.90
  14  -1  -4   -7.80    7.00
 -14   1   4    5.60    4.00
  14  -1   4   -3.70    3.80
  -3 -14  -4   13.50   10.10
  14  -3  -4   -0.70    7.30
  14  -3   4    2.40    4.10
 -14   3   4    6.40    3.90
  -4 -14  -4   -0.90    9.70
  14  -4  -4    4.90    7.20
 -14   4   4    1.50    3.60
  14  -4   4    6.10    4.10
  -5 -14  -4    1.00   10.40
  14  -5  -4    4.50    7.40
  14  -5   4   11.80    4.40
 -14   5   4    6.90    4.40
  -6 -14  -4   -5.60    9.90
  14  -6  -4    5.90    7.50
 -14   6   4   -1.40    3.70
  14  -6   4   -0.40    3.40
  14  -7  -4    0.90    7.30
 -14   7   4    5.30    4.40
  14  -7   4    2.00    3.50
  14  -8  -4    0.70    7.70
   8  14   4   10.00    7.00
  14  -8   4    5.30    3.80
  14  -9  -4   -2.00    7.90
  14  -9   4    6.00    4.60
   9  14   4    6.10    6.80
  14 -10  -4   -4.40    7.70
  10  14   4    4.40    6.70
  14 -11  -4   -8.50    8.10
  11  14   4    1.50    6.20
  14 -12  -4   -3.50    7.90
  12  14   4    3.00    6.70
  14 -13  -4   -4.70    9.30
  13  14   4   -6.20    6.40
  14 -14  -4   -5.10    9.10
  14  14   4   -6.20    5.70
  14 -15  -4   15.30   10.50
  15  14   4    3.10    7.40
  13 -15  -4   56.69   14.40
  15  13   4   65.49   11.40
  12 -15  -4    3.10   10.10
  15  12   4   10.60    7.00
  11 -15  -4   68.89   14.90
  15  11   4   82.69   11.30
  10 -15  -4    7.70    9.00
  15  10   4    3.00    5.70
   9 -15  -4   11.50    9.40
  15   9   4    9.50    6.40
  15   8  -4   12.10    7.20
   8 -15  -4   24.70   10.70
  15   8   4   25.00    7.30
  15   7  -4   15.30    7.80
   7 -15  -4   29.40   10.90
  15   7   4   21.40    7.00
   6 -15  -4    0.20    8.30
  15   6  -4   -1.50    6.10
 -15  -6   4    2.90    4.70
  15   6   4    4.00    5.60
  -6  15   4    6.40    6.30
   5 -15  -4   18.00    9.80
  15   5  -4   18.50    7.80
  15   5   4   19.20    6.60
 -15  -5   4   12.50    5.60
  -5  15   4   16.30    6.60
   4 -15  -4   -0.10    8.40
  15   4  -4    0.20    5.90
  15   4   4    2.50    5.10
 -15  -4   4   -2.30    3.80
  -4  15   4    3.00    4.60
   3 -15  -4    0.60    7.80
  15   3  -4   -6.80    6.10
  15   3   4   -6.40    4.70
 -15  -3   4   -0.80    3.80
  -3  15   4    1.80    4.70
  15   2  -4   -8.70    6.40
   2 -15  -4   -4.80    8.40
  15   2   4    6.20    5.00
 -15  -2   4    0.00    3.90
  -2  15   4    3.70    5.90
  15   1  -4  112.59   15.70
   1 -15  -4  125.89   17.30
  15   1   4  116.09   11.60
  -1  15   4  115.69   14.10
 -15  -1   4  122.69   12.30
   0 -15  -4   14.60    9.30
  15   0  -4   -1.70    7.30
 -15   0   4    1.70    3.90
   0  15   4    4.40    5.40
  15   0   4    2.80    4.20
  -1 -15  -4   49.90   12.60
  15  -1  -4   42.70   10.40
  15  -1   4   35.20    6.60
 -15   1   4   37.50    7.20
  15  -2  -4   -4.80    6.90
  -2 -15  -4    3.10    9.30
  15  -2   4   -2.50    4.10
 -15   2   4   -2.20    3.50
  -3 -15  -4  105.89   16.90
  15  -3  -4  100.69   14.50
 -15   3   4  108.39   11.10
  15  -3   4  110.89   10.80
  15  -4  -4   35.40   10.20
  -4 -15  -4   21.80   11.50
  15  -4   4   25.90    5.60
 -15   4   4   27.60    6.30
  15  -5  -4  396.76   28.90
  -5 -15  -4  437.66   32.40
  15  -5   4  416.76   23.50
 -15   5   4  387.16   27.10
  -6 -15  -4   -5.10    9.80
  15  -6  -4   -0.40    7.60
  15  -6   4    1.70    3.80
  15  -7  -4   35.60   10.60
  15  -7   4   33.80    5.70
  15  -8  -4    8.70    8.40
   8  15   4   24.40    8.40
  15  -8   4   15.50    4.60
  15  -9  -4   76.09   14.30
   9  15   4  106.09   14.00
  15 -10  -4   -5.80    8.20
  10  15   4    4.90    6.90
  15 -11  -4   23.70   10.70
  11  15   4   22.70    8.00
  15 -12  -4   -3.80    8.50
  12  15   4    2.00    6.70
  15 -13  -4    3.20    9.60
  13  15   4    0.70    6.60
  15 -14  -4   -4.70    9.30
  14  15   4   -2.80    6.10
  13 -16  -4    0.60    9.90
  16  13   4   -2.00    6.70
  12 -16  -4   -0.40    9.60
  16  12   4   -4.40    6.40
  11 -16  -4    9.90   10.30
  16  11   4   -0.80    6.40
  10 -16  -4   -0.10    9.30
  16  10   4    4.10    6.50
   9 -16  -4    4.30    9.20
  16   9   4    2.70    6.10
  16   8  -4   -1.80    6.40
   8 -16  -4   14.30    9.40
  16   8   4    3.40    6.00
   7 -16  -4   19.50   10.20
  16   7  -4   15.30    8.60
  16   7   4   29.30    7.70
  16   6  -4   -5.60    6.60
   6 -16  -4    2.70    8.80
  16   6   4    0.70    5.60
  16   5  -4    2.20    7.00
   5 -16  -4    6.40    9.40
  16   5   4   -0.90    5.10
  16   4  -4   -4.80    6.40
   4 -16  -4   -2.10    8.20
  16   4   4   -1.80    4.80
  16   3  -4    8.10    7.40
   3 -16  -4   20.90   10.60
 -16  -3   4   16.10    7.20
  16   3   4   10.60    5.70
   2 -16  -4  -12.40    7.80
  16   2  -4   -0.30    6.80
  16   2   4   -0.80    4.40
 -16  -2   4   -1.50    4.40
  16   1  -4   -1.50    7.30
   1 -16  -4   -7.30    8.40
 -16  -1   4   -1.30    4.40
  16   1   4   -1.60    4.30
  16   0  -4    2.30    7.20
   0 -16  -4   -9.30    8.00
 -16   0   4   -0.30    4.40
  16   0   4   -5.70    4.00
  16  -1  -4   -9.20    7.00
  -1 -16  -4    6.50    9.10
  16  -1   4   -4.30    4.10
  16  -2  -4    6.20    7.60
  -2 -16  -4   -3.10    9.40
  16  -2   4    6.40    4.80
  -3 -16  -4   -8.50    8.70
  16  -3  -4    3.60    7.30
  16  -3   4    1.40    4.30
  16  -4  -4   -0.10    7.40
  -4 -16  -4    0.80    9.70
  16  -4   4   -2.60    4.10
  16  -5  -4   -0.20    7.50
  -5 -16  -4   -2.90    9.60
  16  -5   4    0.80    4.10
  16  -6  -4   -4.20    7.10
  -6 -16  -4   41.20   12.40
  16  -6   4   -2.30    3.90
  16  -7  -4    6.70    8.30
  16  -7   4    1.90    4.40
   7  16   4    9.50    7.00
  16  -8  -4   -0.60    8.00
   8  16   4    7.50    7.20
  16  -8   4    1.20    4.00
  16  -9  -4   -7.00    8.30
   9  16   4    7.40    7.80
  16 -10  -4   -4.70    8.40
  10  16   4   -0.90    7.10
  16 -11  -4   -4.70    8.40
  11  16   4   -6.30    6.40
  16 -12  -4   -6.80    8.50
  12  16   4    2.10    7.00
  16 -13  -4    0.90    8.80
  13  16   4    9.20    7.20
  11 -17  -4   25.20   11.90
  17  11   4   41.10    9.20
  10 -17  -4    5.00    9.90
  17  10   4    4.10    6.50
   9 -17  -4   57.49   13.90
  17   9   4   80.09   11.70
  17   8  -4    8.70    8.10
   8 -17  -4   26.00   11.50
  17   8   4   21.00    7.40
   7 -17  -4  321.57   27.50
  17   7  -4  280.07   23.70
  17   7   4  320.37   21.90
   6 -17  -4    6.00    9.50
  17   6  -4   -7.10    6.90
  17   6   4    1.60    5.80
  17   5  -4    9.20    7.80
   5 -17  -4   17.60   10.60
  17   5   4   17.30    6.30
   4 -17  -4    1.70    9.60
  17   4  -4    6.20    7.80
  17   4   4   11.60    6.20
   3 -17  -4   62.29   14.00
  17   3  -4   58.79   11.60
  17   3   4   64.09    9.10
  17   2  -4    5.90    7.60
   2 -17  -4   -0.50    9.20
  17   2   4   13.40    5.50
  17   1  -4   -5.10    7.40
   1 -17  -4   -6.40    8.80
  17   1   4   -3.50    4.30
  17   0  -4   -4.10    7.20
   0 -17  -4   -5.80    9.60
  17   0   4   -0.80    4.30
  17  -1  -4    0.30    7.60
  -1 -17  -4   -4.50    9.90
  17  -1   4    2.00    4.60
  -2 -17  -4    4.20   10.40
  17  -2  -4    3.80    8.00
  17  -2   4    9.40    5.10
  -3 -17  -4    0.80   10.60
  17  -3  -4   17.90    9.20
  17  -3   4   16.10    5.60
  -4 -17  -4   -1.00   10.30
  17  -4  -4    3.80    7.90
  17  -4   4    5.70    4.70
  -5 -17  -4   31.20   12.80
  17  -5  -4   45.90   11.30
  17  -5   4   34.00    6.60
  17  -6  -4    2.90    8.40
  17  -6   4   -0.80    4.20
  17  -7  -4   -5.90    7.20
  17  -7   4   -2.80    4.00
   7  17   4    3.30    6.80
  17  -8  -4   -4.60    8.10
   8  17   4    4.30    7.30
  17  -8   4   -1.00    4.30
  17  -9  -4   72.49   14.90
   9  17   4   95.09   13.40
  17 -10  -4   -4.10    8.00
  10  17   4    8.90    7.90
  17 -11  -4   36.30   12.40
  11  17   4   38.70    9.90
  10 -18  -4   -0.40    9.90
  18  10   4    1.30    6.50
   9 -18  -4    0.70    9.60
  18   9   4    5.60    6.60
   8 -18  -4    8.80   10.20
  18   8  -4    4.20   10.10
  18   8   4   10.70    6.70
  18   7  -4   14.80    8.90
   7 -18  -4   -5.10    9.40
  18   7   4    2.80    6.10
   6 -18  -4   -3.80    9.40
  18   6  -4   -4.40    7.40
  18   6   4    6.30    6.00
   5 -18  -4   21.20   11.00
  18   5  -4   14.10    8.70
  18   5   4   15.20    6.50
  18   4  -4    4.90    7.90
   4 -18  -4    5.20    9.90
  18   4   4    5.40    5.40
   3 -18  -4  -11.60    8.50
  18   3  -4    3.90    8.00
  18   3   4   -0.50    5.00
  18   2  -4   -3.70    7.10
   2 -18  -4   -4.00    9.20
  18   2   4    2.60    5.00
  18   1  -4    1.30    8.00
   1 -18  -4   -5.30    9.80
  18   1   4    2.20    4.80
   0 -18  -4   -9.70    9.40
  18   0  -4   -7.10    6.80
  18   0   4    0.80    4.70
  18  -1  -4   -5.70    7.30
  -1 -18  -4   -0.10   10.80
  18  -1   4   -0.40    4.50
  18  -2  -4  -12.00    6.70
  -2 -18  -4    1.00   10.80
  18  -2   4    6.20    5.10
  -3 -18  -4   14.90   11.80
  18  -3  -4    2.50    8.20
  18  -3   4    8.50    5.10
  18  -4  -4   -7.80    8.30
  -4 -18  -4   -8.60   10.60
  18  -4   4   -5.40    4.50
  18  -5  -4    0.40    8.60
  -5 -18  -4   -3.70   11.60
  18  -5   4    1.80    4.70
  18  -6  -4  -11.90    7.40
  18  -6   4   -2.50    4.30
   6  18   4    7.40    7.30
  18  -7  -4    5.60    8.60
   7  18   4   50.39   10.10
  18  -8  -4   -7.00    8.10
   8  18   4    0.80    7.50
  18  -8   4   -0.50    4.50
  18  -9  -4    8.70    9.80
   9  18   4    8.50    8.20
  18 -10  -4   -2.40    8.60
  10  18   4    1.60    6.80
   8 -19  -4   -0.90    9.60
  19   8   4   -4.10    5.40
  19   7  -4   49.30   11.40
   7 -19  -4   56.49   14.30
  19   7   4   48.50    9.10
  19   6  -4    1.10    7.70
   6 -19  -4    0.30    9.30
  19   6   4    5.30    5.70
  19   5  -4   -2.00    7.70
   5 -19  -4   -5.70    9.30
  19   5   4   13.00    6.30
   4 -19  -4    3.10   10.00
  19   4  -4    0.70    8.50
  19   4   4    9.20    5.90
   3 -19  -4  166.68   22.10
  19   3  -4  131.39   19.20
  19   3   4  172.88   14.90
  19   2  -4    8.40    9.10
   2 -19  -4   31.00   12.20
  19   2   4   12.10    6.20
  19   1  -4   65.79   13.60
   1 -19  -4   71.39   15.30
  19   1   4   97.59   11.60
  19   0  -4   -3.80    7.80
   0 -19  -4   -8.80   10.30
  19   0   4    4.90    5.20
  19  -1  -4   16.00    9.90
  -1 -19  -4   49.40   14.00
  19  -1   4   35.40    7.00
  -2 -19  -4   23.40   12.40
  19  -2  -4   22.80    9.90
  19  -2   4   26.20    6.50
  -3 -19  -4   96.09   17.20
  19  -3  -4   97.99   15.60
  19  -3   4   93.39   11.50
  19  -4  -4   13.30    9.30
  -4 -19  -4   -0.80   11.30
  19  -4   4    3.30    5.30
  19  -5  -4   29.70   11.40
  19  -5   4   22.40    6.30
  19  -6  -4   -2.10    8.60
  19  -6   4    0.60    4.60
   6  19   4    4.00    7.20
  19  -7  -4   -8.40    7.90
   7  19   4    8.20    7.60
  19  -7   4    4.70    4.90
  19  -8  -4   -5.70    8.30
  19  -8   4    0.30    5.10
   8  19   4    2.80    7.40
  20   5  -4    3.30    8.30
   5 -20  -4   21.80   16.00
  20   5   4    7.30    6.10
  20   4  -4    3.80    8.40
   4 -20  -4    2.80   11.80
  20   4   4   -1.90    5.30
  20   3  -4   -7.30    7.80
   3 -20  -4    9.10   13.10
  20   3   4    4.60    5.50
   2 -20  -4   14.30   12.90
  20   2  -4   -6.30    8.20
  20   2   4   -3.50    5.10
   1 -20  -4    3.70   12.50
  20   1  -4   -6.30    7.90
  20   1   4    0.90    5.30
  20   0  -4    8.30    9.40
   0 -20  -4   -4.00   11.30
  20   0   4    5.40    5.60
  20  -1  -4   -1.70    8.00
  -1 -20  -4   -5.80   11.10
  20  -1   4    0.80    5.00
  -2 -20  -4    6.90   13.00
  20  -2  -4    6.40    9.00
  20  -2   4    6.00    5.60
  -3 -20  -4    4.10   13.00
  20  -3  -4    4.90    9.10
  20  -3   4    0.30    5.10
  -4 -20  -4   -4.50   13.00
  20  -4  -4    0.70    8.70
  20  -4   4   -0.10    5.10
  20  -5  -4   -5.20    8.60
  20  -5   4   -5.30    4.70
   0   0  -5    2.30    6.70
  -1   0  -5   66.69   12.20
   0   1  -5   64.39   11.10
   0  -1  -5   74.19   11.70
   1   0  -5   71.29   11.20
  -1   1  -5  186.88   17.40
   1   1  -5  165.28   16.90
  -1  -1  -5  184.88   18.30
   1  -1  -5  177.58   17.60
   1  -2  -5  139.49   17.10
  -2   1  -5   21.30    8.70
   2  -1  -5   33.10    8.50
  -1  -2  -5   21.90    9.70
   1   2  -5   50.69    9.60
   2  -2  -5  203.68   18.50
  -2  -2  -5  196.78   19.30
   2   2  -5  208.18   17.10
  -2   2  -5  195.08   18.20
   3   2  -5   91.49   11.10
  -2   3  -5  106.69   12.90
  -3  -2  -5   79.19   12.40
   2  -3  -5   78.29   12.30
  -2   3   5   93.39    7.30
  -3  -1  -5   54.59   11.20
   1  -3  -5   70.69   12.70
   3   1  -5   61.49    9.30
  -1   3  -5   76.29   10.80
   3   0  -5  149.29   15.00
  -3   0  -5  201.38   19.20
   0  -3  -5  140.29   17.70
   0   3  -5  178.18   17.00
   1   3  -5    5.40    6.10
   3  -1  -5    1.20    5.80
  -3   1  -5  -11.20    7.00
  -1  -3  -5   36.40    9.30
  -3   1   5   -1.30    2.10
  -3   2  -5   27.90    8.80
   3  -2  -5   22.80    7.80
  -2  -3  -5   11.00    8.40
   2   3  -5   23.90    7.10
  -3   2   5   28.40    3.90
   3  -3  -5    0.80    6.80
  -3  -3  -5    5.10    7.30
  -3   3  -5    4.10    6.30
   3   3  -5   -0.40    5.30
  -3   3   5    7.40    2.90
  -3  -3   5    4.20    2.80
  -4  -3  -5  110.29   14.10
  -3   4  -5   67.89   10.60
   4   3  -5   84.59   10.40
  -4  -3   5   85.49    7.60
  -4  -2  -5  173.78   17.80
   4   2  -5  129.99   13.90
   2  -4  -5  124.29   15.50
  -2   4  -5  116.79   13.90
  -4  -2   5  131.99    9.40
  -2   4   5  136.09    9.30
  -1   4  -5   12.40    7.10
  -4  -1  -5   13.30    8.50
   4   1  -5   21.90    6.70
   1  -4  -5   57.49   11.50
  -4  -1   5   20.10    3.70
   0  -4  -5   -8.20    8.00
  -4   0  -5   22.70    8.50
   0   4  -5   -6.10    6.20
   4   0  -5    1.30    5.50
  -4   0   5    1.90    2.30
  -4   1  -5   -2.10    7.10
  -1  -4  -5   -8.60    7.70
   4  -1  -5   14.00    6.70
  -4   1   5    5.50    2.60
  -4   2  -5  212.38   18.10
  -2  -4  -5  169.68   19.20
   4  -2  -5  192.38   18.00
   2   4  -5  203.28   16.10
  -4   2   5  210.08   12.30
   4  -3  -5   12.40    7.90
  -4   3  -5   26.80    8.10
  -3  -4  -5   18.50    8.90
   3   4  -5   19.70    6.60
  -4   3   5   28.70    4.40
   4   4  -5   36.20    7.30
  -4  -4  -5   43.50   10.80
   4  -4  -5   30.90    8.80
  -4   4   5   36.70    5.00
  -4  -4   5   50.79    6.70
  -5  -4  -5   57.59   12.10
   4  -5  -5   65.49   11.00
  -5  -4   5   75.89    8.60
  -4   5   5   57.49    6.80
   4  -5   5   75.29    7.50
  -3   5  -5  112.39   13.20
   3  -5  -5   91.99   13.10
   5   3  -5  128.69   13.50
  -5  -3  -5   81.39   13.20
  -5  -3   5  106.99    8.60
  -3   5   5   88.19    8.00
   2  -5  -5   30.30    9.40
   5   2  -5   40.10    8.00
  -5  -2  -5   24.20    9.60
  -2   5  -5   17.70    7.20
  -2   5   5   28.60    4.70
  -5  -2   5   27.00    4.60
  -5  -1  -5  119.49   16.50
  -1   5  -5   93.19   11.80
   1  -5  -5  112.39   15.20
   5   1  -5  100.09   12.10
  -1   5   5   96.59    8.30
  -5  -1   5   94.29    8.00
   0  -5  -5   69.09   13.00
   0   5  -5   66.69    9.60
   5   0  -5   51.19    9.70
  -5   0   5   57.89    6.30
  -5   1  -5    2.60    7.60
   5  -1  -5    0.00    6.50
   5  -2  -5   45.00    9.60
   2   5  -5   37.50    7.60
  -5   2  -5   35.10    9.60
  -2  -5  -5   29.70    9.60
  -5   2   5   39.50    5.50
   3   5  -5   20.90    5.90
  -3  -5  -5   20.30    8.40
   5  -3  -5   28.10    8.20
   5  -3   5   17.60    4.90
  -5   3   5   19.80    4.10
  -3  -5   5   23.20    4.40
   4   5  -5   92.89   10.40
  -4  -5  -5   62.79   12.60
  -5   4   5   64.99    7.10
   5  -4   5   52.09    7.30
  -5  -5  -5    0.40    7.80
   5   5  -5    4.80    4.60
   5  -5  -5    2.00    6.80
  -5   5   5    1.50    2.60
   5  -5   5   -1.70    2.90
  -5  -5   5   -0.50    4.10
   5  -6  -5  140.79   17.60
   6   5  -5  191.48   15.10
  -6  -5  -5  171.98   19.90
   5  -6   5  159.08   11.10
  -6  -5   5  180.68   13.60
  -5   6   5  170.08   11.80
  -6  -4  -5  202.28   20.20
   6   4  -5  186.48   16.20
  -6  -4   5  203.98   14.30
   4  -6   5  179.68   12.10
  -4   6   5  199.08   12.90
  -6  -3  -5  132.99   17.90
   6   3  -5  125.49   14.40
   3  -6  -5  130.79   15.60
   3  -6   5  117.09    9.30
  -3   6   5  132.39   10.10
  -6  -3   5  124.99   10.00
   2  -6  -5    6.80    8.10
   6   2  -5    2.20    5.70
  -2   6  -5    1.10    5.80
  -6  -2  -5   -3.30    8.30
  -2   6   5   -1.40    3.20
  -6  -2   5    5.00    2.90
   1  -6  -5   -3.60    9.40
   6   1  -5    9.30    6.30
  -6  -1  -5   13.50    9.00
  -1   6  -5    8.50    5.90
  -1   6   5    9.20    3.50
  -6  -1   5    8.30    3.20
  -6   0  -5   47.00   10.80
   0  -6  -5   50.09   12.10
   0   6   5   48.50    6.00
  -6   0   5   36.60    5.30
  -1  -6  -5  119.99   16.30
   1   6  -5  175.68   13.90
   6  -1  -5  122.29   14.70
   1   6   5  129.99   10.30
   6  -1   5  123.19   11.20
  -6   1   5  133.39    9.80
   6  -2  -5    6.20    6.30
  -2  -6  -5  -12.70    7.10
   2   6  -5    3.60    5.00
   6  -2   5    6.00    4.00
  -6   2   5   -0.40    2.60
   2   6   5    2.20    3.40
  -3  -6  -5   26.40    9.50
   6  -3  -5   42.10    9.70
   3   6  -5   36.10    6.80
   6  -3   5   27.70    5.40
  -3  -6   5   30.50    5.10
  -6   3   5   27.80    4.60
  -4  -6  -5   -7.80    7.90
   6  -4  -5    5.90    6.70
   4   6  -5   -7.80    4.00
  -6   4   5   -2.20    2.40
   6  -4   5   10.60    3.60
  -4  -6   5   -3.90    2.80
   5   6  -5   12.80    5.30
  -5  -6  -5   18.10    9.30
   6  -5  -5   23.30    8.40
   6  -5   5    9.80    3.70
  -5  -6   5   11.60    4.10
  -6   5   5   10.80    3.90
   6  -6  -5   99.79   13.90
  -6  -6  -5  132.39   18.20
   6   6  -5  101.29   11.60
  -6  -6   5   88.19    9.70
   6  -6   5   79.79    7.80
  -6   6   5   84.89    8.50
   7   6  -5   24.30    6.50
  -7  -6  -5    9.80   10.00
   6  -7  -5   25.40    8.60
   6  -7   5   12.40    3.50
  -7  -6   5   27.40    6.70
  -6   7   5   15.10    4.10
   7   5  -5   11.80    5.70
   5  -7  -5   -0.60    6.10
  -7  -5  -5   14.10    9.70
   5  -7   5    2.20    2.80
  -7  -5   5    5.00    4.50
  -5   7   5    2.40    3.20
   4  -7  -5   84.99   12.70
   7   4  -5  122.79   12.90
  -7  -4  -5   69.59   14.00
   4  -7   5   81.59    7.10
  -4   7   5   75.99    8.40
  -7  -4   5   90.19    9.00
  -7  -3  -5    1.40    9.50
   7   3  -5   -1.60    5.30
   3  -7  -5   -7.00    6.40
  -7  -3   5    0.30    3.00
   3  -7   5   -0.70    2.80
  -3   7   5    0.20    3.40
   7   2  -5  165.48   15.30
   2  -7  -5  139.39   18.00
   2  -7   5  166.48   10.40
  -7  -2   5  167.88   11.70
  -2   7   5  142.89   11.40
   1  -7  -5    5.30    9.30
   7   1  -5    1.50    6.10
  -1   7  -5   -5.50    6.00
  -1   7   5    5.00    3.60
  -7  -1   5    2.50    2.70
   7   1   5   -0.50    4.30
   0   7  -5   -3.40    6.20
   7   0  -5   18.10    7.60
   7   0   5    4.00    4.50
  -7   0   5    7.60    2.90
  -1  -7  -5    4.20    8.00
   7  -1  -5   -6.20    6.40
   1   7   5   12.80    4.00
   7  -1   5   -1.80    3.90
  -7   1   5   -1.70    2.30
  -2  -7  -5  102.19   14.70
   2   7  -5   96.49   12.60
   7  -2  -5   99.69   13.30
   2   7   5  102.49    9.70
   7  -2   5   92.19    9.60
  -2  -7   5  107.19    9.50
  -7   2   5   96.99    8.60
  -3  -7  -5   36.30    9.90
   7  -3  -5   35.10    8.80
   7  -3   5   29.50    5.40
  -7   3   5   34.20    5.20
  -4  -7  -5   -2.20    8.40
   7  -4  -5   -5.20    6.00
   4   7  -5   10.40    4.80
   7  -4   5    0.10    3.30
  -7   4   5   -2.10    2.50
   5   7  -5   50.79    7.50
  -5  -7  -5   33.60   11.00
   7  -5  -5   60.19   10.90
   7  -5   5   46.50    6.70
  -5  -7   5   71.29    8.20
  -7   5   5   53.19    6.80
   6   7  -5   40.00    7.40
   7  -6  -5   44.70   10.10
  -6  -7  -5   47.80   12.10
  -6  -7   5   42.30    7.00
  -7   6   5   53.49    6.90
   7  -6   5   48.90    5.80
   7  -7  -5   34.50    9.50
  -7  -7  -5    6.40    9.90
   7   7  -5   16.60    6.00
  -7   7   5   13.90    4.20
   7  -7   5   12.50    3.40
  -7  -7   5    9.40    4.60
   8   7  -5   11.10    5.30
   7  -8  -5    1.20    7.60
  -8  -7   5    0.10    4.70
  -7   8   5    5.30    3.60
   6  -8  -5  149.49   18.00
   8   6  -5  174.08   15.20
  -6   8   5  167.58   12.70
  -8  -6   5  172.68   14.60
   8   5  -5   23.30    6.50
   5  -8  -5   20.90    8.60
   8   5   5   26.80    6.50
  -5   8   5   17.80    4.80
  -8  -5   5   17.90    6.00
   8   4  -5  248.38   18.80
   4  -8  -5  245.18   20.90
  -4   8   5  255.87   15.90
  -8  -4   5  225.78   16.00
   8   4   5  232.28   17.00
   8   3  -5   19.90    7.00
   3  -8  -5   20.40    9.00
  -3   8   5   15.70    4.30
  -8  -3   5   17.80    4.80
   8   3   5   25.90    6.00
   2  -8  -5   38.00    9.10
   8   2  -5    9.50    6.00
  -2   8   5    9.10    3.50
   8   2   5    1.30    4.50
  -8  -2   5    4.10    3.30
   8   1  -5   42.50    9.10
   1  -8  -5   71.39   12.70
   8   1   5   48.90    7.40
  -1   8   5   52.59    7.20
  -8  -1   5   47.70    6.60
   0  -8  -5  192.98   20.30
   8   0  -5  200.78   17.50
  -8   0   5  187.48   13.10
   0   8   5  191.98   13.40
   8   0   5  170.58   13.80
  -1  -8  -5    5.50    8.90
   8  -1  -5    2.90    6.60
   8  -1   5   27.40    5.20
   1   8   5   11.40    4.50
   8  -2  -5   69.39   11.60
  -2  -8  -5   73.79   13.00
  -2  -8   5   60.79    8.10
  -8   2   5   58.49    7.20
   8  -2   5   64.99    8.30
   2   8   5   74.19    9.00
   8  -3  -5   30.70    9.20
  -3  -8  -5   41.60   10.80
  -8   3   5   36.40    5.70
   8  -3   5   36.10    5.80
  -3  -8   5   44.00    6.70
   8  -4  -5   32.40    9.60
  -4  -8  -5   52.09   12.20
   8  -4   5   35.00    5.60
  -4  -8   5   35.20    6.50
  -8   4   5   41.70    5.90
   8  -5  -5   78.49   12.10
  -5  -8  -5   72.39   13.70
  -5  -8   5   71.19    9.20
  -8   5   5   71.29    8.30
   8  -5   5   74.59    8.00
   8  -6  -5   46.60   10.70
  -6  -8  -5   39.10   12.70
   8  -6   5   39.80    5.50
  -8   6   5   41.60    6.30
  -6  -8   5   50.59    7.30
  -7  -8  -5  106.19   16.90
   8  -7  -5  118.99   16.00
  -8   7   5   97.79    9.60
  -7  -8   5  101.49   10.90
   8  -7   5   96.19    8.20
   8  -8  -5    4.70    8.00
  -8  -8   5   -0.30    4.10
  -8   8   5    2.80    3.40
   8  -9  -5   26.60   10.20
   9   8   5   19.50    7.30
  -8   9   5   25.70    5.60
   7  -9  -5   59.39   12.90
   9   7  -5   93.99   12.00
  -7   9   5   97.99    9.70
   9   7   5   68.69   10.40
  -9  -7   5   91.89   12.30
   9   6  -5   11.80    5.70
   6  -9  -5   -1.50    7.50
  -9  -6   5    5.70    5.10
  -6   9   5    1.70    3.50
   9   6   5    3.10    5.40
   5  -9  -5   16.70    8.70
   9   5  -5   40.30    8.00
   9   5   5   26.20    6.70
  -5   9   5   23.20    5.40
  -9  -5   5   25.40    6.00
   4  -9  -5    2.90    7.70
   9   4  -5   22.90    7.00
  -9  -4   5   18.80    4.90
   9   4   5   15.40    5.70
  -4   9   5   11.10    4.10
   3  -9  -5   69.79   12.90
  -3   9   5   84.49    9.10
  -9  -3   5   87.79    9.30
   9   3   5   83.19   10.40
   9   2  -5   38.50    9.70
   2  -9  -5   47.00   12.60
  -2   9   5   58.69    7.70
  -9  -2   5   52.89    7.30
   9   2   5   43.50    7.60
   1  -9  -5  -13.60    7.30
   9   1  -5   -3.30    5.70
   9   1   5    4.70    4.60
  -9  -1   5    0.80    3.10
  -1   9   5   -3.40    3.50
   9   0  -5   39.10    9.00
   9   0   5   38.90    6.70
   0  -9   5   32.20    5.70
  -9   0   5   30.60    5.60
  -1  -9  -5    6.50    8.60
   9  -1  -5    2.10    6.20
  -9   1   5    0.40    2.90
  -1  -9   5   -1.00    3.70
   9  -1   5    0.10    4.10
   1   9   5    2.60    3.70
   9  -2  -5   46.70   10.20
  -2  -9  -5   38.60   11.30
  -9   2   5   55.19    7.20
   9  -2   5   59.59    7.50
   2   9   5   85.19    9.50
  -3  -9  -5    9.20    8.50
   9  -3  -5   -4.00    6.80
  -9   3   5   -0.20    3.00
   9  -3   5    8.40    3.90
   9  -4  -5   54.99   11.00
  -4  -9  -5   67.09   13.20
   9  -4   5   75.19    8.10
  -9   4   5   63.39    7.70
  -4  -9   5   75.49    9.50
  -5  -9  -5    5.20    9.30
   9  -5  -5   -3.60    6.80
  -5  -9   5    5.30    4.20
   9  -5   5    9.60    3.80
   9  -6  -5   19.80    8.90
  -6  -9  -5   62.19   13.60
  -6  -9   5   29.20    6.20
  -9   6   5   25.60    5.50
   9  -6   5   27.60    4.70
   9  -7  -5    9.10    7.80
  -7  -9  -5    9.50   10.50
  -9   7   5    5.00    3.80
   9  -7   5    5.20    3.30
  -7  -9   5    4.90    4.60
   9  -8  -5   59.89   12.10
  -9   8   5   67.89    8.60
   9  -9  -5   25.00    9.70
  -9   9   5   25.30    5.40
   9   9   5    8.30    6.70
   9 -10  -5    3.40    8.80
  10   9   5   -2.00    5.90
   8 -10  -5    7.30    8.20
  -8  10   5    0.10    4.40
  10   8   5    7.20    6.10
   7 -10  -5   52.09   12.10
  10   7  -5   85.89   11.30
  -7  10   5   58.79    8.10
  10   7   5   52.89    9.40
   6 -10  -5    3.40    8.10
  10   6  -5    5.50    5.30
  -6  10   5    5.10    4.00
  10   6   5    0.70    5.30
 -10  -6   5    4.30    5.20
   5 -10  -5  218.98   21.50
  10   5  -5  258.37   19.20
  -5  10   5  242.88   16.30
  10   5   5  225.78   17.80
 -10  -5   5  233.08   16.90
   4 -10  -5   -5.00    7.60
  10   4  -5    6.90    6.50
 -10  -4   5    7.90    4.20
  10   4   5    8.90    5.30
  -4  10   5    8.10    4.40
  10   3  -5   43.50    9.40
   3 -10  -5   61.99   12.30
  -3  10   5   47.50    7.20
  10   3   5   34.30    7.50
 -10  -3   5   34.60    6.30
   2 -10  -5    7.30    9.60
  10   2  -5    2.80    6.50
  -2  10   5   13.70    5.20
   2 -10   5    9.40    4.30
  10   2   5    4.40    4.70
 -10  -2   5    7.90    4.00
  10   1  -5   50.59    9.90
   1 -10  -5   45.40   12.10
  -1  10   5   51.09    7.50
  10   1   5   39.20    7.30
   1 -10   5   40.00    6.50
 -10  -1   5   46.50    7.10
   0 -10  -5   24.40   10.40
  10   0  -5   22.80    8.60
 -10   0   5   20.40    4.90
   0  10   5   34.40    6.50
  10   0   5   16.20    5.30
  -1 -10  -5   45.90   12.10
  10  -1  -5   24.10    9.30
  10  -1   5   38.50    6.70
  -1 -10   5   42.60    6.90
 -10   1   5   35.00    6.10
   1  10   5   55.79    8.40
  10  -2  -5    4.60    7.10
  -2 -10  -5    9.60    8.40
  -2 -10   5    3.90    4.10
  10  -2   5   14.40    4.60
 -10   2   5    4.60    3.50
  10  -3  -5   23.20    9.10
  -3 -10  -5   21.80    9.60
  10  -3   5   28.20    5.60
  -3 -10   5   32.20    6.50
 -10   3   5   25.90    5.30
  10  -4  -5   83.89   13.00
  -4 -10  -5   73.09   14.20
 -10   4   5   79.69    8.70
  10  -4   5   79.79    8.80
  -4 -10   5  106.19   10.80
  -5 -10  -5    9.90   10.00
  10  -5  -5   17.90    8.40
  -5 -10   5   12.00    5.30
 -10   5   5   17.40    4.80
  10  -5   5   14.10    4.30
  -6 -10  -5  185.58   22.20
  10  -6  -5  165.98   18.80
  10  -6   5  178.88   12.20
 -10   6   5  185.98   13.80
  -7 -10  -5    1.30   10.40
  10  -7  -5   -5.40    7.50
  10  -7   5   -3.00    2.80
 -10   7   5   -1.60    3.10
  10  -8  -5   21.20    9.80
 -10   8   5   12.20    4.50
  10  -9  -5    5.90    8.40
   9  10   5    1.30    6.50
  10 -10  -5   31.90   11.40
  10  10   5   63.29   10.30
  10 -11  -5   33.00   10.60
  11  10   5   31.40    8.60
   9 -11  -5   -6.80    7.50
  11   9   5   11.10    6.60
   8 -11  -5   13.80    9.10
  11   8   5   15.10    7.00
   7 -11  -5    6.00    8.30
  11   7  -5   21.60    7.00
  11   7   5    5.70    6.50
  11   6  -5   10.80    6.10
   6 -11  -5    5.10    7.80
  11   6   5    7.20    5.80
  -6  11   5    6.20    5.40
   5 -11  -5   -5.90    7.40
  11   5  -5    9.60    6.80
  -5  11   5    0.20    4.30
  11   5   5    4.10    5.40
 -11  -5   5    6.20    4.30
  11   4  -5   -3.90    6.30
   4 -11  -5   -8.70    7.70
  -4  11   5    3.60    4.30
  11   4   5    3.80    5.10
 -11  -4   5    4.30    4.10
  11   3  -5   57.89   11.10
   3 -11  -5   68.89   14.50
  -3  11   5   61.39    8.90
  11   3   5   60.79    9.00
 -11  -3   5   68.39    8.80
   2 -11  -5    1.50    8.50
  11   2  -5    6.30    6.80
  -2  11   5   -3.00    3.60
   2 -11   5    0.80    4.10
 -11  -2   5    0.30    3.20
  11   2   5   -1.80    4.30
  11   1  -5    1.10    6.80
   1 -11  -5    6.00    8.80
 -11  -1   5    8.20    4.10
   1 -11   5    9.30    4.70
  11   1   5   12.20    5.70
  -1  11   5    1.20    5.00
   0 -11  -5   33.00   10.10
  11   0  -5    5.30    6.90
 -11   0   5    7.70    3.90
  11   0   5    6.50    4.90
   0 -11   5    8.10    4.00
   0  11   5   23.60    5.90
  11  -1  -5   26.10    9.20
  -1 -11  -5   38.40   10.80
   1  11   5   34.40    7.00
 -11   1   5   24.80    5.40
  -1 -11   5   26.50    6.50
  11  -1   5   22.60    6.10
  -2 -11  -5    5.60    8.90
  11  -3  -5   29.50    9.70
  -3 -11  -5   28.70   11.20
  11  -3   5   34.30    6.10
  -3 -11   5   23.00   10.70
 -11   3   5   28.20    5.80
  11  -4  -5   45.00   11.10
  -4 -11  -5   38.70   12.80
 -11   4   5   50.39    7.20
  11  -4   5   52.39    6.90
  11  -5  -5   -7.20    7.00
  -6 -11  -5    1.60   10.10
  11  -6  -5    2.10    7.40
  11  -6   5   -2.50    3.10
 -11   6   5   -1.90    3.20
  11  -7  -5   18.30    9.70
  -7 -11  -5   36.00   12.60
 -11   7   5   23.90    7.20
  11  -7   5   20.70    4.50
  11  -8  -5   46.10   11.70
  11  -9  -5   17.00    9.30
   9  11   5    2.40    7.50
  11 -10  -5    9.80    9.10
  10  11   5    6.30    7.20
  11 -11  -5    7.40    9.20
  11  11   5    5.20    7.00
  11 -12  -5   13.20    9.80
  12  11   5   -1.10    6.50
  10 -12  -5   35.40   12.00
  12  10   5   35.40    9.00
   9 -12  -5   11.20   10.50
  12   9   5   13.00    7.10
   8 -12  -5    6.40    9.40
  12   8   5   28.80    7.60
   7 -12  -5   12.90   10.00
  12   7  -5   25.90    8.40
  12   7   5   27.50    7.90
  12   6  -5  120.89   15.50
   6 -12  -5  137.99   18.50
  12   6   5  166.78   14.90
   5 -12  -5    2.90    8.50
  12   5  -5    6.70    7.00
  12   5   5   10.70    5.90
  12   4  -5   76.59   12.80
   4 -12  -5   83.99   14.60
  12   4   5   74.29   10.00
   3 -12  -5    4.80    9.00
  12   3  -5    2.80    7.30
 -12  -3   5    1.70    3.90
  12   3   5   -0.40    4.80
  12   2  -5    6.20    7.50
   2 -12  -5    6.80    8.60
 -12  -2   5    7.40    4.40
  12   2   5    2.60    5.20
  12   1  -5   80.39   12.90
   1 -12  -5   88.79   14.90
 -12  -1   5   94.89   10.20
  12   1   5   82.39   10.70
   0 -12  -5   62.29   13.10
  12   0  -5   67.89   12.40
 -12   0   5   48.70    7.50
  12   0   5   58.19    8.30
  12  -1  -5   24.30    9.50
  -1 -12  -5   35.00   11.00
 -12   1   5   19.60    5.40
  12  -1   5   26.50    6.20
  12  -2  -5    6.00    8.10
  -2 -12  -5   13.60    9.60
 -12   2   5    8.90    4.30
  12  -2   5    8.50    4.90
  -3 -12  -5   20.50   10.70
  12  -3  -5   22.40    9.20
 -12   3   5   21.20    5.10
  12  -3   5   10.40    5.00
  -4 -12  -5   -5.90    9.30
  12  -4  -5   -6.90    7.30
  12  -4   5   -1.70    3.80
 -12   4   5   -1.50    3.20
  -5 -12  -5   69.19   15.10
  12  -5  -5   79.19   13.60
 -12   5   5   74.49    9.70
  12  -5   5   65.19    8.70
  -6 -12  -5    6.80   11.00
  12  -6  -5   10.20    8.60
  12  -6   5   -0.30    3.50
  12  -7  -5   70.39   13.70
  -7 -12  -5  104.49   16.90
  12  -7   5   81.39    8.40
  12  -8  -5    5.10    8.70
  12  -9  -5    2.50    8.30
   9  12   5   21.60    8.50
  12 -10  -5   34.50   11.90
  10  12   5   39.40    9.70
  12 -11  -5   11.10    9.30
  11  12   5   10.90    7.60
  12 -12  -5   10.60   10.00
  12  12   5    9.70    7.50
  12 -13  -5   -4.00    9.30
  13  12   5    0.40    7.00
  11 -13  -5    2.10    8.90
  13  11   5    7.60    7.20
  10 -13  -5   -1.60    8.40
  13  10   5   -0.80    6.40
   9 -13  -5   30.60   10.70
  13   9   5    8.00    6.90
   8 -13  -5    4.00    9.50
  13   8   5   15.10    7.30
   7 -13  -5   -9.90    8.00
  13   7  -5   -1.10    6.20
  13   7   5   -6.60    5.60
  13   6  -5   13.30    7.00
   6 -13  -5   -7.60    8.10
  13   6   5   -4.20    5.20
  13   5  -5    9.50    7.70
   5 -13  -5    0.00    9.50
  13   5   5   11.20    6.50
  13   4  -5   19.60    9.20
   4 -13  -5   11.40   10.70
  13   4   5   32.10    7.50
   3 -13  -5   -9.00    8.10
  13   3  -5   -2.50    6.80
  13   3   5   -0.30    5.00
  13   2  -5   58.19   11.70
   2 -13  -5   47.20   12.90
  13   2   5   55.49    8.70
  13   1  -5    1.00    7.40
   1 -13  -5   11.60   10.00
  13   1   5    8.10    5.30
  13   0  -5   -1.00    7.60
   0 -13  -5    8.40    9.50
 -13   0   5    3.40    5.40
  13   0   5    3.00    4.90
  13  -1  -5   31.90   10.40
  -1 -13  -5   46.80   12.20
 -13   1   5   46.80    9.70
  13  -1   5   47.30    7.70
  13  -2  -5   22.20   10.30
  -2 -13  -5   31.40   11.30
  13  -2   5   33.50    6.70
  -3 -13  -5   31.50   12.10
  13  -3  -5   20.00    9.70
  13  -3   5   18.80    5.60
  -4 -13  -5  -14.80    9.50
  13  -4  -5   -1.20    7.70
  13  -4   5   -1.40    4.00
  13  -5  -5    4.60    8.40
  -5 -13  -5  -13.20   11.20
  13  -5   5   11.10    4.60
  13  -6  -5   30.60   10.50
  -6 -13  -5   23.30   13.30
  13  -6   5   29.70    5.70
  -7 -13  -5    6.60   10.60
  13  -7  -5    5.20    8.90
  13  -7   5   13.90    4.40
  13  -8  -5   -1.10    7.90
   8  13   5   12.10    7.40
  13  -9  -5   -2.50    8.70
   9  13   5   11.40    7.50
  13 -10  -5    4.80    8.80
  10  13   5   18.80    8.40
  13 -11  -5   -3.90    8.60
  11  13   5    5.40    7.60
  13 -12  -5   -7.90    9.00
  12  13   5   -1.10    7.30
  13 -13  -5    0.00   10.00
  13  13   5    2.30    7.30
  13 -14  -5   14.80   11.60
  14  13   5   13.00    7.90
  12 -14  -5   24.00   11.60
  14  12   5   10.70    7.70
  11 -14  -5   12.30   10.30
  14  11   5    5.60    7.20
  10 -14  -5   -5.60    8.80
  14  10   5   -2.50    6.30
   9 -14  -5    5.30    9.40
  14   9   5    3.80    6.50
   8 -14  -5  -12.50    8.00
  14   8   5   -2.60    5.70
   7 -14  -5   22.90   11.00
  14   7   5   45.40    8.60
  14   6  -5   -6.20    6.30
   6 -14  -5   10.50    9.80
  14   6   5   10.70    6.00
  14   5  -5    2.90    7.60
   5 -14  -5    6.20    9.70
  14   5   5   28.80    7.40
   4 -14  -5    4.80    9.20
  14   4  -5    8.00    7.50
  14   4   5    4.30    5.50
   3 -14  -5   -5.50    8.40
  14   3  -5   -4.00    6.90
  14   3   5   -0.10    5.20
   2 -14  -5   25.50   11.30
  14   2  -5   13.90    8.90
  14   2   5   26.10    7.00
  14   1  -5   -6.70    7.40
   1 -14  -5   -3.40    8.60
  14   1   5   -0.30    4.90
  14   0  -5   84.39   15.00
   0 -14  -5   75.89   14.90
  14   0   5   91.99   11.20
  -1 -14  -5   12.30    9.80
  14  -1  -5   -9.20    7.10
  14  -1   5    3.20    4.90
  14  -2  -5   -4.90    7.30
  -2 -14  -5    8.10   10.50
  14  -2   5   -4.60    4.20
  -3 -14  -5   45.30   13.30
  14  -3  -5   42.60   11.90
  14  -3   5   48.00    7.40
  -4 -14  -5  169.38   22.20
  14  -4  -5  126.69   18.30
  14  -4   5  148.09   12.40
  -5 -14  -5   97.29   17.40
  14  -5  -5   93.89   15.60
  14  -5   5   89.79    9.90
  -6 -14  -5  100.19   17.40
  14  -6  -5   86.59   15.00
  14  -6   5   90.29    9.70
  14  -7  -5   -1.00    8.20
  -7 -14  -5    1.00   11.20
  14  -7   5    0.70    3.80
  14  -8  -5   -3.50    8.20
   8  14   5    5.80    7.20
  14  -9  -5   23.10   10.60
   9  14   5   28.50    8.90
  14 -10  -5    4.80    9.70
  10  14   5    7.50    7.80
  14 -11  -5   21.10   11.40
  11  14   5   37.60   10.00
  14 -12  -5   -1.30    9.30
  12  14   5    2.40    7.30
  14 -13  -5   -1.90    9.30
  13  14   5   -7.30    6.60
  12 -15  -5    4.80    9.80
  15  12   5   -2.50    6.40
  11 -15  -5    3.60    9.90
  15  11   5    7.10    7.20
  10 -15  -5   14.10   11.00
  15  10   5   16.40    7.70
   9 -15  -5    5.30   10.10
  15   9   5    9.30    6.70
   8 -15  -5   -6.50    8.80
  15   8   5    3.30    6.30
   7 -15  -5   -6.00    8.30
  15   7   5   -2.50    5.90
   6 -15  -5   -3.40    9.30
  15   6  -5   -3.70    7.00
  15   6   5   12.90    6.50
   5 -15  -5   -9.30    8.40
  15   5  -5   -1.90    7.40
  15   5   5    3.40    5.60
  15   4  -5    3.60    8.20
   4 -15  -5    1.40    9.50
  15   4   5    3.30    5.50
  15   3  -5    7.90    8.60
   3 -15  -5   13.60   10.30
  15   3   5    7.20    5.80
  15   2  -5   38.60   10.90
   2 -15  -5   16.10   10.70
  15   2   5   35.50    7.50
   1 -15  -5   -3.00    9.00
  15   1  -5   -2.20    7.90
  15   1   5    0.60    5.30
  15   0  -5   -0.40    7.90
   0 -15  -5    3.50    9.50
  15   0   5   -4.80    4.50
  -1 -15  -5    1.20    9.40
  15  -1  -5   -1.30    7.60
  15  -1   5    5.80    5.20
  -2 -15  -5   51.19   13.90
  15  -2  -5   42.20   11.30
  15  -2   5   57.09    8.20
  -3 -15  -5   -1.90   10.00
  15  -3  -5    3.20    8.40
  15  -3   5   -2.90    4.30
  15  -4  -5    7.00    9.50
  -4 -15  -5   22.30   12.00
  15  -4   5   22.50    5.70
  15  -5  -5   -6.10    8.30
  -5 -15  -5    9.40   10.80
  15  -5   5    0.40    4.40
  15  -6  -5    0.80    9.60
  -6 -15  -5   28.60   13.30
  15  -6   5   24.30    5.70
  -7 -15  -5   11.20   11.40
  15  -7  -5   -3.10    8.80
  15  -7   5    3.90    4.20
  15  -8  -5    2.40    9.20
   8  15   5   19.20    8.50
  15  -9  -5   -4.10    8.80
   9  15   5   -1.20    7.20
  15 -10  -5   -5.00    9.20
  10  15   5   11.60    8.30
  15 -11  -5    1.40   10.20
  11  15   5    8.20    8.20
  15 -12  -5    0.70    9.80
  12  15   5    2.20    7.20
  10 -16  -5  -11.60    8.10
  16  10   5    6.00    6.90
   9 -16  -5   29.60   12.10
  16   9   5   25.90    8.20
   8 -16  -5   52.89   14.10
  16   8   5   76.49   11.40
   7 -16  -5   45.20   13.90
  16   7   5   43.00    9.20
   6 -16  -5   42.00   12.90
  16   6  -5   24.50   10.60
  16   6   5   44.40    8.90
   5 -16  -5   -2.30    9.30
  16   5  -5   -7.10    7.70
  16   5   5   -0.60    5.60
   4 -16  -5  -13.00    8.50
  16   4  -5    2.70    8.30
  16   4   5    1.10    5.80
  16   3  -5   15.60    9.40
   3 -16  -5   14.30   10.40
  16   3   5   11.90    6.40
   2 -16  -5    2.60    9.40
  16   2  -5   -6.00    7.50
  16   2   5   -1.60    5.20
  16   1  -5    6.00    8.90
   1 -16  -5   11.60   10.40
  16   1   5    8.50    6.00
   0 -16  -5    2.70   10.00
  16   0  -5    3.80    8.30
  16   0   5    5.50    5.40
  16  -1  -5   -8.00    7.20
  -1 -16  -5   10.20   10.10
  16  -1   5   -4.50    4.60
  -2 -16  -5   12.70   11.00
  16  -2  -5    6.90    8.20
  16  -2   5   -4.80    4.60
  -3 -16  -5   12.70   11.70
  16  -3  -5    7.90    8.70
  16  -3   5    1.80    4.70
  -4 -16  -5   54.79   15.20
  16  -4  -5   63.99   13.90
  16  -4   5   57.99    8.20
  16  -5  -5   -9.30    7.80
  -5 -16  -5   -2.40   10.80
  16  -5   5    1.40    4.50
  -6 -16  -5   18.10   12.60
  16  -6  -5    9.50   10.00
  16  -6   5   25.30    5.80
  16  -7  -5   -6.30    9.00
  16  -7   5    3.30    4.90
  16  -8  -5   16.30   11.00
   8  16   5   35.70   10.00
  16  -9  -5   10.20   10.60
   9  16   5   10.50    8.30
  16 -10  -5   32.40   12.10
  10  16   5   54.19   11.70
   9 -17  -5   10.20   10.90
  17   9   5    0.40    6.60
   8 -17  -5    3.40    9.80
  17   8   5  -11.10    5.40
   7 -17  -5   -6.60    9.40
  17   7   5    1.40    6.50
   6 -17  -5   31.70   12.40
  17   6  -5   14.30   10.00
  17   6   5   24.70    8.10
   5 -17  -5    0.90   10.00
  17   5  -5    3.40    9.10
  17   5   5    0.10    5.90
   4 -17  -5   16.70   12.00
  17   4  -5   21.20   10.30
  17   4   5   26.60    7.60
   3 -17  -5   -2.60   10.00
  17   3  -5    4.20    8.80
  17   3   5    2.40    5.80
   2 -17  -5   -5.90    9.30
  17   2  -5   -3.10    8.20
  17   2   5   -6.80    4.70
  17   1  -5   -0.70    8.40
   1 -17  -5    7.20   10.40
  17   1   5    2.50    5.40
  17   0  -5    1.00    8.60
   0 -17  -5    1.90    9.90
  17   0   5   -2.20    4.90
  -1 -17  -5    2.70   11.40
  17  -1  -5   17.90    9.80
  17  -1   5   19.30    6.30
  17  -2  -5    7.40    9.00
  -2 -17  -5    5.40   11.50
  17  -2   5   11.30    5.80
  17  -3  -5   12.00    9.50
  -3 -17  -5   10.10   11.40
  17  -3   5   -0.90    4.80
  -4 -17  -5   14.00   12.90
  17  -4  -5   12.20   10.20
  17  -4   5   20.00    6.30
  -5 -17  -5    8.50   11.80
  17  -5  -5    1.40    9.50
  17  -5   5    1.20    4.50
  17  -6  -5    1.40    9.70
  -6 -17  -5   26.70   13.70
  17  -6   5    5.50    4.70
  17  -7  -5    6.50    9.80
   7  17   5   10.50    8.00
  17  -8  -5   38.10   12.50
   8  17   5   44.60   11.00
  17  -9  -5   -0.10    9.30
   9  17   5    1.10    8.10
   6 -18  -5   23.30   11.60
  18   6  -5   22.50   10.10
  18   6   5   16.00    7.40
   5 -18  -5    2.90   10.00
  18   5  -5    3.70    8.90
  18   5   5    4.20    6.00
   4 -18  -5    9.80   10.90
  18   4  -5    6.00    9.20
  18   4   5    7.70    6.40
   3 -18  -5   30.70   12.40
  18   3  -5   13.90   10.00
  18   3   5   32.40    7.90
  18   2  -5   56.29   13.50
   2 -18  -5   61.29   14.80
  18   2   5   49.00    8.80
   1 -18  -5   12.40   11.40
  18   1  -5   -5.10    8.50
  18   1   5    3.60    5.70
  18   0  -5   -2.60    8.90
   0 -18  -5    4.50   10.70
  18   0   5    3.80    5.50
  18  -1  -5    9.90    9.70
  -1 -18  -5   51.59   14.80
  18  -1   5   14.50    6.20
  -2 -18  -5   34.10   13.90
  18  -2  -5   23.80   10.90
  18  -2   5   24.80    6.90
  -3 -18  -5   36.30   14.10
  18  -3  -5   43.20   12.60
  18  -3   5   44.10    7.80
  -4 -18  -5   11.40   12.30
  18  -4  -5   -1.90    9.10
  18  -4   5    9.30    5.30
  18  -5  -5   12.50   10.50
  -5 -18  -5   16.30   13.00
  18  -5   5   10.00    5.40
  18  -6  -5    0.90    9.20
  18  -6   5   -0.50    4.40
   3 -19  -5    8.00   11.20
  19   3  -5    1.10    8.80
  19   3   5   -1.30    5.50
  19   2  -5    1.40    9.20
   2 -19  -5   -2.80   10.60
  19   2   5    2.20    5.60
   1 -19  -5   -1.20   10.50
  19   1  -5   -3.30    9.00
  19   1   5    1.90    5.30
   0 -19  -5   32.60   14.20
  19   0  -5   34.10   12.00
  19   0   5   21.90    7.10
  -1 -19  -5   -1.50   11.10
  19  -1  -5    2.40    9.30
  19  -1   5   -3.90    4.90
  19  -2  -5    8.70    9.80
  -2 -19  -5   -7.90   10.90
  19  -2   5    2.50    5.30
  -3 -19  -5    4.50   11.80
  19  -3  -5    8.20    9.70
  19  -3   5   -1.70    4.70
   0   0  -6  506.45   33.00
  -1  -1  -6    6.00    8.30
   1  -1  -6   20.00    8.50
   1   1  -6   13.10    7.70
  -1   1  -6   13.90    8.30
  -1   2  -6   94.79   13.60
   1  -2  -6   72.89   12.50
  -2  -1  -6   76.89   13.20
   2   0  -6   72.39   11.90
  -2   0  -6   51.59   12.30
   0  -2  -6   87.89   13.20
   0   2  -6   88.79   13.00
   2  -1  -6   42.00   10.20
  -2   1  -6   40.30   10.80
  -1  -2  -6   44.30   10.70
   2  -2  -6   33.10    9.70
  -2   2  -6   32.40   10.30
   2   2  -6   37.40    9.20
  -2  -2  -6   26.60   10.00
   3   2  -6   10.30    6.90
  -3  -2  -6    4.50    8.60
   2  -3  -6    4.70    8.40
  -2   3  -6   21.10    8.90
  -1   3  -6   19.50    8.20
   1  -3  -6    8.30    8.20
   3   1  -6    8.40    6.70
  -3  -1  -6    3.60    8.50
   0   3  -6    8.10    8.50
   0  -3  -6   11.50    8.90
  -3   0  -6   -7.20    8.60
   3   0  -6    8.70    7.10
  -1  -3  -6   22.30    9.90
  -3   1  -6   45.30   10.70
   1   3  -6   25.60    8.90
   3  -1  -6   15.10    8.10
  -2  -3  -6   34.70   10.20
  -3   2  -6   -6.90    7.40
   3  -2  -6    1.20    7.30
   2   3  -6   -2.60    6.10
  -3   3  -6   13.60    8.60
  -3  -3  -6    6.40    8.60
   3  -3  -6   19.00    9.00
  -3   4  -6   12.00    8.00
   3  -4  -6   14.60    8.50
   4   3  -6   16.20    7.00
  -4  -3  -6   13.20    9.40
  -3   4   6   19.60    3.90
   2  -4  -6   61.09   12.80
   4   2  -6   69.79   10.90
  -4  -2  -6   71.99   13.10
  -2   4  -6   69.49   11.60
  -4  -1  -6   29.40   10.60
  -1   4  -6   45.70   10.70
   1  -4  -6   39.30   11.30
   4   1  -6   41.90    9.20
  -4  -1   6   42.60    5.20
   4   0  -6   96.19   12.90
  -4   0  -6   74.29   14.00
   0   4  -6  119.29   15.60
   0  -4  -6  102.69   14.90
  -4   1  -6   72.89   12.60
  -1  -4  -6   58.09   12.50
   4  -1  -6   49.99   10.60
   4  -2  -6   -4.10    6.20
  -4   2  -6  -12.30    7.30
  -2  -4  -6   -4.50    7.80
   2   4  -6   -0.50    6.70
  -4   2   6   -3.30    2.50
  -4   3  -6   22.40    9.30
   4  -3  -6    8.60    7.00
  -3  -4  -6    0.30    8.20
   3   4  -6   20.80    6.90
  -4   3   6    7.80    3.20
   4   4  -6    0.30    5.90
  -4  -4  -6    1.80    8.50
  -4   4  -6   -8.10    7.70
   4  -4  -6    4.50    7.90
  -4   4   6   -2.00    2.50
  -5  -4  -6   84.69   15.30
   5   4  -6  132.39   14.30
   4  -5  -6  158.88   17.50
   4  -5   6  130.79   10.50
  -5  -4   6  117.39    9.90
  -4   5   6  113.99    9.60
   3  -5  -6   10.20    8.20
  -3   5  -6   15.20    7.90
  -5  -3  -6    6.10    9.10
   5   3  -6    6.60    6.20
  -3   5   6    3.50    3.70
  -5  -3   6    8.00    3.20
  -2   5  -6   17.60    8.00
   2  -5  -6   31.40   10.60
   5   2  -6   23.80    7.70
  -5  -2  -6   26.50   10.60
  -5  -2   6   17.40    3.90
  -1   5  -6   -1.00    6.60
  -5  -1  -6    3.60    8.80
   5   1  -6   -6.30    5.50
   1  -5  -6   -3.40    7.80
  -5  -1   6   -1.30    2.20
   0  -5  -6   19.70    9.40
   0   5  -6   19.10    8.50
   5   0  -6   13.70    7.30
  -5   0  -6   14.20    9.70
  -5   0   6   19.00    4.00
   1   5  -6   -8.90    6.90
  -5   1  -6    8.60    8.70
   5  -1  -6    0.30    6.50
  -1  -5  -6    0.80    8.20
  -5   1   6   -4.10    2.20
  -5   2  -6   53.59   11.90
   2   5  -6   64.49   10.90
   5  -2  -6   60.99   11.20
  -2  -5  -6   49.99   12.20
  -5   2   6   49.40    6.20
  -3  -5  -6    6.40    8.50
   3   5  -6    7.20    6.30
   5  -3  -6    8.90    7.10
  -5   3   6    6.50    3.40
   4   5  -6   36.00    7.90
  -4  -5  -6   22.00   10.80
   5  -4  -6   28.10    9.40
   5  -4   6   21.10    5.30
  -5   4   6   21.20    4.60
  -5  -5  -6   10.50   10.00
   5   5  -6   16.30    6.90
   5  -5  -6   23.80    8.90
  -5   5   6   11.40    3.60
   5  -5   6    6.20    4.30
  -5  -5   6    9.10    3.80
   5  -6  -6   -2.40    8.00
   6   5  -6    6.10    5.70
  -6  -5  -6    0.00    9.40
  -5   6   6    0.40    4.50
   5  -6   6    1.90    3.80
   4  -6  -6   59.99   12.30
   6   4  -6   68.19   10.40
  -6  -4  -6   69.69   14.40
  -4   6   6   66.19    8.30
   4  -6   6   79.59    8.60
  -6  -4   6   85.69    8.60
  -6  -3  -6   71.59   14.30
   6   3  -6   69.29   10.80
   3  -6  -6   51.69   12.10
   3  -6   6   76.79    8.30
  -3   6   6   72.59    8.50
  -6  -3   6   70.99    7.50
   2  -6  -6  102.19   15.80
   6   2  -6  106.49   14.10
  -6  -2  -6   92.39   15.30
  -2   6   6   99.69    9.10
  -6  -2   6  100.19    8.70
   1  -6  -6    0.00    8.50
   6   1  -6    6.80    6.90
  -6  -1  -6    8.10    9.70
  -1   6   6    5.60    3.70
  -6  -1   6    2.40    2.70
   0  -6  -6   72.69   13.80
  -6   0  -6  136.59   18.10
   6   0  -6   66.19   11.50
  -6   0   6   71.29    7.40
   6  -1  -6   34.70    9.10
  -1  -6  -6   31.90   10.80
  -6   1   6   30.50    4.80
  -2  -6  -6    2.30    8.90
   6  -2  -6   11.70    7.90
  -6   2   6    9.00    3.50
   6  -2   6   14.20    5.30
  -3  -6  -6    3.70    8.40
   6  -3  -6   -7.20    6.40
   6  -3   6   -1.50    4.00
  -6   3   6    0.30    3.00
  -4  -6  -6   92.69   15.60
   6  -4  -6  101.19   14.50
  -6   4   6   91.39    9.10
  -4  -6   6  106.59   10.50
   6  -4   6   85.49    9.60
   6  -5  -6   55.69   11.50
  -5  -6  -6   43.60   12.80
  -6   5   6   44.70    8.60
   6  -5   6   52.09    6.90
   6  -6  -6   20.20    9.30
  -6  -6  -6   31.70   11.70
   6  -6   6   19.00    5.10
   6  -7  -6   10.90    9.10
  -7  -6  -6   20.40   11.70
   5  -7  -6   43.50   11.20
  -7  -5  -6   45.20   12.70
   7   5  -6   46.80    9.40
   7   4  -6   10.50    7.60
   4  -7  -6   32.30    9.70
  -7  -4  -6    6.70   10.10
   3  -7  -6   25.30   10.30
  -7  -3  -6   17.50   11.20
   7   3  -6   10.80    7.80
  -7  -3   6   11.90    4.90
  -3   7   6   13.60    5.30
  -7  -2  -6   13.30   10.50
   7   2  -6    9.80    7.50
   2  -7  -6   26.20   10.10
  -2   7   6    4.80    4.00
  -7  -2   6    6.40    3.40
   1  -7  -6   12.50    9.50
   7   1  -6   -0.70    6.90
  -1   7   6    4.20    3.80
  -7  -1   6    1.00    2.80
   7   1   6    3.50    5.30
   0  -7  -6   54.29   12.70
   7   0  -6   41.10   10.50
   7   0   6   37.90    7.60
   0   7   6   67.09    8.20
  -7   0   6   44.10    6.20
   7  -1  -6   20.60    8.70
  -1  -7  -6    7.60    8.90
  -7   1   6    9.10    3.70
   7  -1   6   11.10    5.30
   1   7   6   12.20    4.60
   7  -2  -6    8.50    8.20
  -2  -7  -6    3.10    8.80
   7  -2   6    3.70    4.70
  -7   2   6    3.30    3.40
  -3  -7  -6   -2.40    8.00
   7  -3  -6    1.90    7.20
   7  -3   6   -0.10    4.20
  -7   3   6   -1.30    2.80
   7  -4  -6   22.70    9.30
  -4  -7  -6   13.70   10.30
   7  -4   6   12.40    5.00
   7  -5  -6    7.50    7.90
  -5  -7  -6   -1.30    9.40
   7  -5   6    2.90    3.90
   7  -6  -6   65.09   12.50
  -6  -7  -6   54.39   13.80
   7  -6   6   56.29    7.90
   7  -7  -6    1.90    8.20
  -7  -7  -6   16.20   11.70
   7  -8  -6   29.30   10.90
  -8  -7  -6   32.60   13.00
   6  -8  -6   43.50   11.10
   5  -8  -6    5.80    8.20
   8   5  -6    5.90    6.40
   4  -8  -6   -5.20    8.30
   8   4  -6    8.50    7.60
   8   4   6    3.30    5.90
   8   3  -6   85.99   12.40
   3  -8  -6   51.49   13.40
   8   3   6   64.49    9.90
   2  -8  -6   15.60   10.10
   8   2  -6   14.60    7.80
   8   2   6    5.90    5.80
   8   1  -6   28.00    9.30
   1  -8  -6   22.50   10.00
   8   1   6   47.60    7.90
   8   0  -6    6.70    7.60
   0  -8  -6    0.70    8.60
   8   0   6    5.90    5.70
   8  -1  -6   18.50    8.60
  -1  -8  -6    3.00    8.90
   8  -1   6   13.60    5.70
   8  -2  -6    4.90    8.10
  -2  -8  -6    1.30    8.90
   8  -2   6    6.80    5.00
   8  -3  -6   42.40   11.30
  -3  -8  -6   24.00   11.00
   8  -3   6   40.60    6.70
  -4  -8  -6  104.29   17.10
   8  -4  -6   96.59   15.20
   8  -4   6  110.69   10.60
   8  -5  -6   11.70    8.70
  -5  -8  -6    0.50    9.30
   8  -5   6   -7.10    3.50
  -6  -8  -6   36.60   13.00
   8  -6  -6   34.10   10.80
   8  -6   6   43.80    6.50
  -7  -8  -6   20.30   12.20
   8  -7  -6   23.20   10.10
  -8  -8  -6   82.99   16.40
   8  -8  -6   86.19   15.20
   8  -9  -6   -2.60    8.80
   9   8   6    4.10    6.60
   7  -9  -6    6.60    9.30
   9   7   6    8.20    6.80
   6  -9  -6   34.10   11.10
   9   6   6   22.50    8.20
   9   5  -6   16.20    7.30
   5  -9  -6  -13.40    8.00
   9   5   6    5.00    6.10
   9   4  -6   70.79   11.70
   4  -9  -6   42.40   12.70
   9   4   6   52.29    9.40
   3  -9  -6   14.50    9.90
   9   3  -6    1.80    6.70
   9   3   6    4.00    5.70
   9   2  -6   15.20    8.10
   2  -9  -6   13.20    9.50
   1  -9  -6   18.00   10.30
   9   1  -6    1.70    7.20
   9   1   6    3.40    5.50
   0  -9  -6   -2.20    8.60
   9   0  -6   -2.90    7.20
   9   0   6   25.60    6.20
   9  -1  -6    3.10    7.90
  -1  -9  -6   11.90    9.20
   9  -1   6    9.50    5.30
  -2  -9  -6   14.70   10.10
   9  -2  -6    9.50    8.50
   9  -2   6   21.30    6.00
   9  -3  -6    2.60    7.90
  -3  -9  -6   -0.30    8.80
   9  -3   6    1.30    4.60
   9  -4  -6   50.29   12.00
  -4  -9  -6   40.20   12.50
   9  -4   6   40.60    6.60
   9  -5  -6    2.00    8.60
  -5  -9  -6   17.80   11.30
   9  -5   6   27.20    5.70
   9  -6  -6   26.50   10.50
  -6  -9  -6   36.90   13.40
   9  -6   6   20.60    5.50
   9  -7  -6    9.90    9.30
  -7  -9  -6   25.90   12.70
   9  -8  -6    0.10    8.20
  -8  -9  -6    1.30   11.30
   9  -9  -6   -8.00    8.20
   9   9   6    9.70    7.40
   9 -10  -6   20.30   10.20
  10   9   6    5.00    7.50
   8 -10  -6   62.79   13.40
  10   8   6  109.59   14.80
   7 -10  -6    2.40    9.10
  10   7   6    3.50    6.60
   6 -10  -6    8.40    9.10
  10   6   6    6.70    6.90
   5 -10  -6    0.10    8.60
  10   5  -6   19.40    8.10
  10   5   6    1.00    5.90
   4 -10  -6   84.39   16.10
  10   4  -6  158.48   17.20
  10   4   6  113.79   14.00
  10   3  -6    2.70    7.10
   3 -10  -6   -5.20    9.00
  10   3   6    7.10    5.90
   2 -10  -6  194.78   22.30
  10   2  -6  184.68   19.70
  10   2   6  206.48   16.80
  10   1  -6    7.80    7.80
   1 -10  -6    2.00    9.40
  10   1   6   11.90    5.90
  10   0  -6   19.60    9.20
   0 -10  -6   31.80   12.40
  10   0   6   38.50    7.70
  -1 -10  -6   -1.20    9.20
  10  -1  -6   -4.80    7.20
  10  -1   6    3.00    5.20
  -2 -10  -6   14.50   10.90
  10  -2  -6    0.70    8.50
  10  -2   6   10.40    5.60
  10  -4  -6   14.40    9.70
  -4 -10  -6   24.90   11.60
  10  -4   6   25.60    6.00
  10  -5  -6    3.90    8.40
  -5 -10  -6   21.30   12.00
  10  -5   6    5.00    4.40
  10  -6  -6    7.80    9.00
  -6 -10  -6    2.20   11.10
  10  -6   6   -0.20    3.90
  -7 -10  -6   17.80   12.40
  10  -7  -6    5.10    9.70
  -8 -10  -6   11.00   11.80
  10  -8  -6    4.00    8.70
  10  -9  -6   19.30   10.30
   9  10   6   16.70    8.60
  10 -10  -6   24.60   11.60
  10  10   6   24.50    9.10
  10 -11  -6   -0.50    8.90
  11  10   6   -9.50    6.70
   9 -11  -6   -0.10    8.60
  11   9   6   -4.80    7.20
   8 -11  -6    7.60    9.40
  11   8   6   26.20    8.90
   7 -11  -6   10.70    9.90
  11   7   6   25.80    8.60
   6 -11  -6   27.60   11.30
  11   6   6   38.80    9.30
  11   5  -6   44.50   10.10
   5 -11  -6   14.60   10.00
  11   5   6   31.80    8.60
   4 -11  -6   16.00   10.10
  11   4  -6    7.20    7.20
  11   4   6   18.20    7.10
   3 -11  -6    2.80    8.90
  11   3  -6    6.70    7.90
  11   3   6    3.40    6.00
   2 -11  -6    6.50    9.20
  11   2  -6   13.20    8.50
  11   2   6    6.00    6.00
  11   1  -6    1.40    8.30
   1 -11  -6    6.60    9.50
  11   1   6    2.30    5.60
  11   0  -6   18.30    9.70
   0 -11  -6   37.70   12.30
  11   0   6   28.50    7.40
  11  -1  -6    2.10    8.40
  -1 -11  -6   60.69   12.90
  11  -1   6    6.90    5.70
  -2 -11  -6   12.80    9.70
  11  -2  -6    7.10    8.80
  11  -2   6   10.40    5.60
  11  -3  -6    0.10    8.60
  -3 -11  -6   25.30   11.30
  11  -3   6    3.50    4.80
  -4 -11  -6   18.60   10.90
  11  -4  -6    7.60    8.90
  11  -4   6    7.00    5.00
  11  -5  -6   -0.90    8.40
  -5 -11  -6    5.40   11.70
  11  -5   6   -4.20    4.00
  -6 -11  -6   -3.20   11.40
  11  -6  -6   27.10   10.90
  11  -6   6   21.90    6.70
  11  -7  -6   -7.00    8.20
  -7 -11  -6   -1.70   11.90
  11  -8  -6   28.20   10.90
  -8 -11  -6   14.00   12.30
  11  -9  -6    1.40    9.60
   9  11   6    1.30    7.40
  11 -10  -6    2.80    9.50
  10  11   6   -1.50    7.40
  11 -11  -6   13.20   10.10
  11  11   6    1.50    7.70
  11 -12  -6    3.10    9.70
  12  11   6   -2.00    7.40
  10 -12  -6   20.10   11.10
  12  10   6    3.30    7.40
   9 -12  -6   23.90   11.40
  12   9   6   21.00    8.80
   8 -12  -6    5.90    9.50
  12   8   6    0.30    6.80
   7 -12  -6   -3.20    9.10
  12   7   6   13.80    7.70
   6 -12  -6   -8.00    8.40
  12   6   6   -6.40    5.80
  12   5  -6   21.70    8.50
   5 -12  -6    3.10    9.70
  12   5   6   11.90    7.00
  12   4  -6   20.70    8.60
   4 -12  -6    8.20   10.70
  12   4   6   12.20    6.60
  12   3  -6   36.80   10.30
   3 -12  -6   22.00   10.80
  12   3   6   24.10    7.70
  12   2  -6   81.69   14.00
   2 -12  -6   76.59   15.20
  12   2   6   92.59   11.70
   1 -12  -6    9.20    9.90
  12   1  -6    4.30    8.30
  12   1   6   -3.30    5.40
   0 -12  -6    7.60    9.80
  12   0  -6    0.00    7.90
  12   0   6    1.50    5.20
  -1 -12  -6   12.40   10.40
  12  -1  -6    6.20    8.80
  12  -1   6   11.10    5.70
  -2 -12  -6  212.98   23.90
  12  -2  -6  184.28   21.30
  12  -2   6  212.88   16.00
  12  -3  -6    2.50    8.60
  -3 -12  -6   54.69   13.50
  12  -3   6    4.90    4.90
  -4 -12  -6   86.59   16.10
  12  -4  -6   78.99   14.90
  12  -4   6   68.09    8.70
  12  -5  -6    7.30    9.30
  -5 -12  -6    3.00   11.80
  12  -5   6    5.20    4.70
  12  -6  -6   24.40   10.90
  -6 -12  -6   20.50   12.80
  12  -7  -6    2.30    8.90
  -7 -12  -6    7.70   11.60
  12  -8  -6   66.49   14.40
  12  -9  -6   13.80   10.30
   9  12   6   17.80    8.90
  12 -10  -6    1.20    9.80
  10  12   6   -2.90    7.60
  12 -11  -6   -9.60    9.00
  11  12   6   -7.90    7.50
  12 -12  -6   -6.20    9.70
  12  12   6   -4.40    7.30
  11 -13  -6    5.00   10.50
  13  11   6    0.50    7.30
  10 -13  -6    1.60   10.00
  13  10   6    5.50    7.60
   9 -13  -6    0.80    9.60
  13   9   6    4.40    7.20
   8 -13  -6  -10.70    8.70
  13   8   6   12.90    7.10
   7 -13  -6   -8.30    9.40
  13   7   6    2.20    6.60
   6 -13  -6   -8.10    9.30
  13   6   6   -3.50    6.60
   5 -13  -6   -1.50    8.90
  13   5  -6    9.20    7.00
  13   5   6    0.00    6.20
  13   4  -6    6.50    7.90
   4 -13  -6    6.30    9.00
  13   4   6    8.20    6.50
   3 -13  -6    3.60    9.60
  13   3  -6    0.40    7.60
  13   3   6    5.60    6.30
   2 -13  -6   16.20    9.80
  13   2  -6    2.40    7.90
  13   2   6    1.60    6.20
   1 -13  -6   18.80   10.80
  13   1  -6   10.30    9.10
  13   1   6   15.10    6.90
  13   0  -6   -0.80    8.20
   0 -13  -6    8.40   10.20
  13   0   6   -0.40    5.50
  -1 -13  -6    8.80   10.30
  13  -1  -6    8.80    8.80
  13  -1   6    2.20    5.50
  13  -2  -6    7.60    8.70
  -2 -13  -6   14.90   10.80
  13  -2   6    2.70    5.40
  13  -3  -6    5.70    9.20
  -3 -13  -6   31.10   12.10
  13  -3   6   15.70    6.00
  13  -4  -6   53.19   13.60
  -4 -13  -6   71.59   15.40
  13  -4   6   58.99    8.40
  13  -5  -6   20.70   10.60
  -5 -13  -6   14.50   12.10
  13  -5   6   24.00    5.90
  -6 -13  -6   36.10   14.30
  13  -6  -6   28.40   11.50
  -7 -13  -6    6.00   11.60
  13  -7  -6    5.20    9.90
  13  -8  -6   -8.30    8.80
  13  -9  -6   -0.90   10.10
   9  13   6    9.00    8.10
  13 -10  -6    8.50   10.80
  10  13   6   16.40    8.90
  13 -11  -6    0.70    9.80
  11  13   6   -0.40    7.80
  10 -14  -6   33.90   12.90
  14  10   6   61.79   11.80
   9 -14  -6    8.70   10.60
  14   9   6    2.80    7.30
   8 -14  -6    1.80   10.20
  14   8   6    1.90    7.10
   7 -14  -6    0.70    9.60
  14   7   6   -1.70    6.50
   6 -14  -6    1.50   10.30
  14   6   6    4.70    6.70
  14   5  -6    0.60    6.90
   5 -14  -6   -4.80    9.30
  14   5   6    0.10    6.10
  14   4  -6   15.00    9.10
   4 -14  -6   27.30   12.80
  14   4   6   20.30    7.30
  14   3  -6    9.40    8.60
   3 -14  -6   11.40   11.40
  14   3   6   14.30    7.10
   2 -14  -6   22.00   11.30
  14   2  -6    4.30    8.40
  14   2   6    8.50    6.40
   1 -14  -6   -2.00    9.50
  14   1  -6    1.00    8.40
  14   1   6    0.40    5.70
  14   0  -6   -2.90    8.30
   0 -14  -6   -3.70    9.50
  14   0   6    1.10    5.50
  14  -1  -6   19.50   10.00
  -1 -14  -6    7.20   10.70
  14  -1   6   17.30    6.40
  14  -2  -6   23.10   10.80
  -2 -14  -6   29.80   12.80
  14  -2   6   33.70    7.40
  14  -3  -6    6.60    9.50
  -3 -14  -6   25.70   13.00
  14  -3   6   19.80    6.40
  14  -4  -6    6.80    9.50
  -4 -14  -6   15.30   12.90
  14  -4   6    4.40    5.20
  14  -5  -6    0.10    9.60
  -5 -14  -6    0.80   11.10
  14  -5   6    2.10    4.70
  -6 -14  -6   32.90   14.30
  14  -6  -6   32.80   12.60
  -7 -14  -6   17.10   13.30
  14  -7  -6    3.20    9.80
  14  -8  -6   43.80   14.30
   8  14   6   73.39   13.00
  14  -9  -6    6.50   10.30
   9  14   6    6.70    7.90
  14 -10  -6    4.50   10.30
  10  14   6    1.90    7.70
   8 -15  -6   14.80   12.00
  15   8   6   29.60    9.10
   7 -15  -6    4.60   10.80
  15   7   6    8.70    7.10
   6 -15  -6   11.50   11.40
  15   6   6   11.50    7.00
   5 -15  -6   -0.90    9.70
  15   5  -6  -10.70    7.20
  15   5   6    6.10    6.50
  15   4  -6  -10.20    7.20
   4 -15  -6   -6.30    9.50
  15   4   6   -2.30    5.90
  15   3  -6   -0.80    8.10
   3 -15  -6   -7.20    9.20
  15   3   6    5.20    6.10
  15   2  -6   -1.90    8.70
   2 -15  -6    0.70    9.80
  15   2   6    0.00    5.80
  15   1  -6   -6.30    8.40
   1 -15  -6   -9.00    9.40
  15   1   6   -1.80    5.80
  15   0  -6   -2.10    9.00
   0 -15  -6   -6.70    9.60
  15   0   6    7.80    6.20
  -1 -15  -6   -6.20    9.90
  15  -1  -6   -0.60    8.50
  15  -1   6    0.90    5.40
  15  -2  -6    9.50   10.10
  -2 -15  -6   -2.80   10.70
  15  -2   6    4.60    5.60
  15  -3  -6   28.00   11.30
  -3 -15  -6    8.40   11.90
  15  -3   6   11.50    5.70
  -4 -15  -6    9.30   12.70
  15  -4  -6  -10.80    8.50
  15  -4   6    2.90    5.10
  -5 -15  -6   -0.20   11.60
  15  -5  -6    2.00    9.70
  15  -5   6    6.40    5.10
  -6 -15  -6   18.40   13.60
  15  -6  -6   -6.60    9.30
  15  -7  -6    2.80    9.90
  -7 -15  -6    4.00   12.50
  15  -8  -6   20.10   11.40
   8  15   6   19.00    9.00
   7 -16  -6   20.40   11.90
   6 -16  -6    9.20   11.30
  16   6   6   14.60    7.40
   5 -16  -6    7.20   10.90
  16   5   6   13.90    7.40
  16   4  -6   16.10   10.30
   4 -16  -6   23.90   12.70
  16   4   6   32.80    8.40
  16   3  -6    1.60    9.00
   3 -16  -6   -2.50   10.00
  16   3   6    3.60    6.10
   2 -16  -6   10.30   11.30
  16   2  -6   -3.00    9.60
  16   2   6    7.40    6.60
   1 -16  -6    2.80   10.60
  16   1  -6    4.30    9.90
  16   1   6    8.80    6.30
  16   0  -6   19.00   11.00
   0 -16  -6   33.90   13.30
  16   0   6   39.70    8.40
  -1 -16  -6   -0.90   11.10
  16  -1  -6    6.80    9.50
  16  -1   6    4.20    5.50
  16  -2  -6   14.50   10.90
  -2 -16  -6   42.70   14.70
  16  -2   6   31.60    7.20
  -3 -16  -6   -5.40   11.00
  16  -3  -6   13.60   10.60
  16  -3   6   10.40    5.70
  -4 -16  -6   18.60   13.20
  16  -4  -6    3.60    9.70
  16  -4   6    6.20    5.40
  -5 -16  -6   -4.10   11.60
  16  -5  -6   -8.90    9.10
  16  -5   6    2.30    5.00
  16  -6  -6   -8.70    9.40
  -6 -16  -6  -14.20   10.20
   4 -17  -6   14.70   11.60
   3 -17  -6    3.40   10.60
  17   3  -6    0.00    9.30
  17   3   6    5.60    6.70
   2 -17  -6    5.40   10.50
  17   2  -6    0.10    9.60
  17   2   6    4.60    6.30
  17   1  -6   -0.60    9.40
   1 -17  -6    2.80   10.40
  17   1   6   -2.10    5.90
   0 -17  -6   10.20   11.00
  17   0  -6   -2.80    9.60
  17   0   6   -2.20    5.30
  17  -1  -6   -0.40    9.70
  -1 -17  -6    0.00   11.50
  17  -1   6    5.80    5.60
  17  -2  -6   16.80   11.00
  -2 -17  -6    3.80   11.30
  17  -2   6   12.70    6.20
  -3 -17  -6   23.80   13.50
  17  -3  -6    4.80    9.90
  17  -3   6    4.20    5.40
  -4 -17  -6   13.80   12.70
   0   0  -7   24.40   10.30
  -1   0  -7   20.60   10.20
   0  -1  -7   28.30   10.70
   1   0  -7   33.30   10.70
   0   1  -7   25.90   10.70
  -1  -1  -7  281.17   25.30
   1  -1  -7  282.87   25.00
  -1   1  -7  275.07   25.30
   2   1  -7   61.09   12.30
  -1   2  -7   63.09   12.90
  -2  -1  -7   48.60   12.90
   2   0  -7   26.60    9.60
   0   2  -7   37.30   10.90
   0  -2  -7   23.10   10.60
  -2   0  -7    5.20   10.00
   2  -1  -7   25.60    9.70
   1   2  -7   49.60   11.40
  -2   1  -7   19.60   11.10
  -1  -2  -7   12.60    9.80
   2  -2  -7    7.20    8.10
   2   2  -7    7.60    8.70
  -2   2  -7   13.90    9.40
  -2  -2  -7   -3.80    8.40
  -3  -2  -7   22.00   10.90
   3   2  -7   13.60    8.40
   2  -3  -7   12.40    8.70
  -2   3  -7   27.10    9.70
   1  -3  -7   36.50   10.80
  -1   3  -7   38.60   11.70
  -3  -1  -7   18.70   11.10
   3   1  -7   25.30    9.60
   0  -3  -7   22.20    9.70
  -3   0  -7    7.20   10.10
   3   0  -7   17.00    8.70
  -3   1  -7    7.50    9.90
   1   3  -7   10.50    9.40
  -1  -3  -7    3.00    8.70
   3  -1  -7    5.30    8.10
   2   3  -7   30.10    9.80
  -2  -3  -7    8.00    9.50
   3  -2  -7    0.60    7.70
  -3   2  -7   19.20    9.80
   3  -3  -7   10.40    8.90
  -3  -3  -7   15.40   10.80
  -3   3  -7    6.90    9.10
   3   3  -7   14.80    8.40
  -4  -3  -7   23.70   11.40
   3  -4  -7   20.70    9.80
   4   3  -7   17.50    8.00
  -3   4  -7   14.80    9.90
  -2   4  -7   11.40    8.70
   4   2  -7    5.50    7.40
  -4  -2  -7   11.20    9.90
   2  -4  -7   15.10    9.00
  -1   4  -7   17.80    8.80
   4   1  -7    7.70    8.30
   1  -4  -7    9.70    8.60
  -4  -1  -7    7.50   10.40
   0   4  -7   20.00    9.50
   4   0  -7    2.40    7.70
  -4   0  -7    1.50    9.90
   0  -4  -7   17.60   10.00
  -4   1  -7    0.20    9.50
   1   4  -7   12.60    9.20
  -1  -4  -7   -1.60    9.00
   4  -1  -7    2.70    8.30
   4  -2  -7    6.00    8.30
  -4   2  -7   13.50   10.00
  -2  -4  -7    3.30    9.50
   2   4  -7    7.50    8.90
   4  -3  -7   19.90    9.70
  -4   3  -7   27.60   11.70
  -3  -4  -7   33.90   12.50
   3   4  -7   46.30   10.70
   4   4  -7   14.10    7.90
  -4  -4  -7   -2.20    9.60
   4  -4  -7   35.70   11.10
  -5  -4  -7   29.20   12.50
   4  -5  -7   17.80   10.10
   5   4  -7   36.40    9.50
   3  -5  -7  156.78   20.10
   5   3  -7  160.98   17.90
  -5  -3  -7  139.29   19.90
  -5  -2  -7   17.40   10.50
   5   2  -7   11.80    7.90
   2  -5  -7   11.60    9.60
   5   1  -7  192.88   20.40
  -5  -1  -7  199.58   23.30
   1  -5  -7  226.58   22.80
   0  -5  -7   31.60   11.80
  -5   0  -7   26.50   11.80
   5   0  -7   14.40    8.60
  -5   1  -7   28.90   11.90
  -2  -5  -7    3.90    9.70
   5  -2  -7    9.10    7.80
  -5   2  -7    3.80   10.80
  -3  -5  -7   10.90   10.90
   5  -3  -7   24.10   10.00
   5  -3   7   19.90    6.50
  -4  -5  -7   -0.30   10.20
   5  -4  -7   15.70    9.20
   5  -4   7   -0.10    4.60
   5  -5  -7   10.90    9.10
  -5  -5  -7    9.20   10.60
  -6  -5  -7   -8.10    9.70
   5  -6  -7    6.90    9.40
  -6  -4  -7   -7.50    9.80
   6   4  -7    6.90    7.10
   4  -6  -7   -2.10    8.80
   3  -6  -7    7.40    9.20
  -6  -3  -7   -2.30    9.90
   6   3  -7    1.00    6.80
  -6  -2  -7   -8.40    9.60
   2  -6  -7   12.60    9.50
   6   2  -7   15.10    8.20
   1  -6  -7   43.80   11.80
  -6  -1  -7   -9.50   10.00
   6   1  -7   15.30    8.50
   0  -6  -7   -4.40    9.30
  -6   0  -7   14.70   11.60
   6   0  -7    0.20    7.20
  -1  -6  -7   -7.20    9.10
   6  -1  -7   13.30    8.60
   6  -2  -7    8.10    7.60
  -2  -6  -7   -4.00    9.30
   6  -2   7   -0.30    5.30
  -3  -6  -7   -3.50    9.90
   6  -3  -7   -5.20    8.00
   6  -3   7    0.30    5.00
  -4  -6  -7   -8.20    9.40
   6  -4  -7   -5.50    7.70
   6  -4   7    0.80    4.50
  -5  -6  -7   -4.00    9.90
   6  -5  -7   -1.40    8.10
   6  -6  -7    3.40    8.50
  -6  -6  -7    9.30   11.40
   6  -7  -7   16.00    9.60
  -7  -6  -7    4.20   10.90
  -7  -5  -7   -8.70   10.10
   5  -7  -7    1.00    8.80
   7   4  -7   -3.00    7.10
  -7  -4  -7   12.40   11.40
   4  -7  -7   -2.20    9.60
   7   3  -7   18.30    8.50
  -7  -3  -7   -5.00   10.30
   3  -7  -7   -5.90    9.30
   2  -7  -7    4.90    9.60
   7   2  -7    9.60    7.80
   7   1  -7   24.90    9.10
   1  -7  -7    9.50   10.20
   7   1   7   13.80    6.90
   7   0  -7   18.00    8.80
   0  -7  -7    5.10    9.90
   7   0   7    2.80    6.20
  -1  -7  -7    0.90    9.80
   7  -1  -7    6.70    7.60
   7  -1   7    1.90    5.60
  -2  -7  -7    5.90   10.50
   7  -2  -7   16.40    8.80
   7  -2   7   12.30    6.00
   7  -3  -7   78.79   14.60
  -3  -7  -7   63.49   15.70
   7  -3   7   82.59   10.80
  -4  -7  -7   -9.30   10.50
   7  -4  -7    8.00    8.40
   7  -4   7    1.80    4.80
  -5  -7  -7   84.39   16.90
   7  -5  -7   81.89   14.80
  -6  -7  -7    1.40   10.90
   7  -6  -7   12.40    8.80
  -7  -7  -7   18.60   12.10
   7  -7  -7   35.90   11.30
   7  -8  -7    6.40    8.90
   6  -8  -7    0.50    8.30
   5  -8  -7    3.60    9.00
   8   5   7   -3.30    6.40
   4  -8  -7    4.60    9.10
   8   4  -7    7.40    8.10
   8   4   7   -4.20    6.40
   8   3  -7   13.70    8.40
   3  -8  -7    2.70    9.30
   8   3   7   16.10    7.40
   2  -8  -7   -1.40    8.80
   8   2  -7    6.80    7.50
   8   2   7    4.70    6.60
   8   1  -7   16.00    8.60
   1  -8  -7    0.00    8.80
   8   1   7   -1.70    5.90
   8   0  -7    5.40    8.00
   0  -8  -7    7.00    9.30
   8   0   7   -2.20    5.90
   8  -1  -7    4.00    7.70
  -1  -8  -7    5.80    9.60
   8  -1   7   -4.80    5.40
   8  -2  -7    7.50    8.30
  -2  -8  -7    2.30    9.40
   8  -2   7    6.50    5.70
   8  -3  -7    8.50    9.00
  -3  -8  -7    5.10   10.90
   8  -3   7   10.90    5.70
   8  -4  -7    7.10    9.00
  -4  -8  -7    1.30   10.70
   8  -4   7    2.20    4.90
   8  -5  -7   16.30   10.50
  -5  -8  -7    1.40   11.20
  -6  -8  -7    3.50   11.00
   8  -6  -7   13.20    9.40
  -7  -8  -7    5.90   11.50
   8  -7  -7   -2.50    8.50
   8  -8  -7   -2.60    8.80
   8  -9  -7    6.80   10.00
   9   8   7   20.90    8.70
   7  -9  -7   72.89   15.40
   9   7   7  113.99   15.80
   6  -9  -7    1.60    9.30
   9   6   7   12.60    7.70
   5  -9  -7    7.80    9.80
   9   5   7    9.90    7.60
   9   4  -7   11.60    8.60
   4  -9  -7    6.20    9.40
   9   4   7    6.70    7.00
   9   3  -7  148.69   18.20
   3  -9  -7  132.99   19.40
   9   3   7  146.59   16.40
   9   2  -7    3.00    8.10
   2  -9  -7    4.40    9.80
   9   2   7    3.70    6.50
   1  -9  -7   10.70   10.70
   9   1  -7   25.30   10.30
   9   1   7   36.30    8.50
   0  -9  -7   15.80   10.40
   9   0  -7   -4.70    7.80
   9   0   7   -1.30    5.50
  -1  -9  -7   17.80   10.70
   9  -1  -7    6.10    8.40
   9  -1   7   -1.00    5.40
   9  -2  -7    9.40    9.00
  -2  -9  -7   20.80   11.00
   9  -2   7    0.60    5.70
  -3  -9  -7    0.40   10.70
   9  -3  -7  -10.80    8.70
   9  -3   7    2.00    5.20
   9  -4  -7   -0.10    8.40
  -4  -9  -7   -1.00   10.50
   9  -4   7    0.60    4.90
  -5  -9  -7   -8.90    9.90
   9  -5  -7    1.70    9.10
  -6  -9  -7   17.30   12.10
   9  -6  -7    0.60    9.00
  -7  -9  -7   -0.20   11.60
   9  -7  -7   14.00   10.80
   9  -8  -7   -1.30    9.20
   9  -9  -7   35.60   13.00
   9   9   7   54.39   11.90
   9 -10  -7    0.40    9.70
  10   9   7    8.50    8.40
   8 -10  -7   -3.60    8.90
  10   8   7    8.60    8.10
   7 -10  -7    0.90    9.20
  10   7   7   -4.00    6.80
   6 -10  -7   -6.40    8.90
  10   6   7   13.10    7.90
   5 -10  -7   -7.20    8.50
  10   5   7    6.10    7.40
  10   4  -7   13.60   13.00
   4 -10  -7   -2.90    8.80
  10   4   7    7.90    7.40
   3 -10  -7    7.90    9.30
  10   3  -7   19.70    9.70
  10   3   7    3.20    6.60
  10   2  -7    3.30    8.40
   2 -10  -7   -3.00    8.40
  10   2   7    5.60    6.60
  10   1  -7   10.30    9.20
   1 -10  -7    9.30    9.60
  10   1   7   10.00    6.60
  10   0  -7   -7.80    7.50
   0 -10  -7    3.90    9.50
  10   0   7    0.30    5.70
  -1 -10  -7   19.70   10.90
  10  -1  -7   -5.20    7.90
  10  -1   7    1.10    5.90
  -2 -10  -7   28.40   11.40
  10  -2  -7   -6.50    8.50
  10  -2   7   -5.70    5.40
  10  -3  -7   -1.80    9.00
  -3 -10  -7   17.50   11.20
  10  -3   7    0.00    5.30
  10  -4  -7   -4.10    8.70
  -4 -10  -7    7.10   10.90
  10  -4   7    2.70    4.90
  -5 -10  -7    3.00   11.50
  10  -5  -7   -0.40    8.90
  10  -6  -7   -1.60    9.00
  -6 -10  -7   31.30   13.60
  -7 -10  -7    1.00   11.00
  10  -7  -7   12.30   10.30
  10  -8  -7    5.80    9.70
  10  -9  -7   12.80   10.90
   9  10   7   25.80    9.80
  10 -10  -7    1.70    9.60
  10  10   7    8.20    8.70
  10 -11  -7    9.00   10.00
  11  10   7   -0.90    8.20
   9 -11  -7    5.70   10.10
  11   9   7    0.50    7.80
   8 -11  -7    2.30   10.00
  11   8   7   -0.50    7.30
   7 -11  -7   16.60   11.00
  11   7   7   23.80    9.10
   6 -11  -7   -3.70    9.30
  11   6   7    1.60    7.10
   5 -11  -7    0.00    9.10
  11   5   7    6.30    7.20
   4 -11  -7   19.70   11.10
  11   4   7   16.70    7.80
  11   3  -7  151.28   18.90
   3 -11  -7   90.99   17.30
  11   3   7  147.29   16.00
   2 -11  -7    1.90    9.70
  11   2  -7    7.60    8.70
  11   2   7    9.10    6.90
  11   1  -7   46.30   12.40
   1 -11  -7   34.70   13.20
  11   1   7   41.40    9.40
   0 -11  -7   11.90   10.90
  11   0  -7   14.30    9.80
  11   0   7   10.50    6.80
  11  -1  -7   51.59   13.40
  -1 -11  -7   38.20   13.10
  11  -1   7   61.19    9.50
  -2 -11  -7   36.10   12.30
  11  -2  -7    4.60    9.70
  11  -2   7   10.30    6.20
  11  -3  -7   69.49   14.60
  -3 -11  -7   83.19   17.30
  11  -3   7  106.49   12.40
  11  -4  -7   -6.10    9.70
  -4 -11  -7   13.10   12.10
  11  -4   7    3.50    5.20
  -5 -11  -7   -5.90   10.60
  11  -5  -7   -4.10    9.10
  -6 -11  -7   -4.10   11.50
  11  -6  -7    5.40    9.50
  -7 -11  -7   28.70   13.30
  11  -7  -7   20.20   11.50
  11  -8  -7    6.80   10.80
  11  -9  -7   10.70   11.20
   9  11   7    6.80    8.80
  11 -10  -7   -3.40    9.60
  10  11   7    4.60    8.10
   8 -12  -7   -1.20    9.30
  12   8   7    7.60    7.90
   7 -12  -7    4.40    9.50
  12   7   7    1.80    7.30
   6 -12  -7    2.10    9.90
  12   6   7    7.40    7.60
   5 -12  -7   -1.80    9.60
  12   5   7    1.20    6.80
   4 -12  -7    6.80   10.00
  12   4   7    2.90    6.80
   3 -12  -7   12.20   10.40
  12   3  -7   15.80    9.20
  12   3   7    4.50    7.10
   2 -12  -7   14.00   10.20
  12   2  -7    0.70    8.00
  12   2   7    3.90    6.90
   1 -12  -7    2.80    9.90
  12   1  -7    9.80    8.70
  12   1   7   -1.70    6.50
  12   0  -7    3.30    9.00
   0 -12  -7    1.40    9.80
  12   0   7    7.50    6.60
  -1 -12  -7    7.20   10.00
  12  -1  -7    9.20    9.40
  12  -1   7    5.40    5.90
  -2 -12  -7    0.30   10.30
  12  -2  -7   -2.10    9.10
  12  -2   7    6.70    6.00
  -3 -12  -7    6.30   11.30
  12  -3  -7    8.50   10.10
  12  -3   7    2.30    5.40
  12  -4  -7    5.50   10.20
  -4 -12  -7    4.80   11.50
  12  -4   7    5.50    5.80
  -5 -12  -7    9.70   12.40
  12  -5  -7    2.60    9.70
  12  -6  -7    2.70    9.80
  -6 -12  -7   24.40   13.20
  12  -7  -7    7.60   10.50
  -7 -12  -7   -0.80   11.50
  12  -8  -7    0.00    9.70
   7 -13  -7   -1.60    9.70
  13   7   7   -7.10    6.90
   6 -13  -7    4.20    9.90
  13   6   7   -6.70    6.50
   5 -13  -7    0.30   10.20
  13   5   7    9.00    7.80
   4 -13  -7   -5.30    9.50
  13   4   7   -7.50    6.30
   3 -13  -7   -2.50    9.60
  13   3  -7    6.00    8.60
  13   3   7    0.80    6.70
   2 -13  -7   -4.20    9.80
  13   2  -7   -0.70    8.30
  13   2   7   -3.60    6.10
  13   1  -7   -2.60    8.40
   1 -13  -7   -6.50    9.90
  13   1   7   -9.40    5.50
  13   0  -7    1.80    9.70
   0 -13  -7    8.60   11.40
  13   0   7    8.90    6.90
  -1 -13  -7   33.10   14.30
  13  -1  -7   35.70   12.70
  13  -1   7   58.19    9.50
  -2 -13  -7   -0.90   11.50
  13  -2  -7   -2.70    8.70
  13  -2   7   10.40    6.40
  13  -3  -7   37.10   13.00
  -3 -13  -7   43.10   15.20
  13  -3   7   45.60    8.40
  -4 -13  -7   -0.90   11.40
  13  -4  -7   -6.40    9.20
  13  -5  -7    1.30    9.20
  -5 -13  -7   -9.20   10.80
  -6 -13  -7    7.00   11.80
  13  -6  -7   -1.90   10.50
  13  -7  -7   50.79   14.10
  -7 -13  -7   61.99   16.50
   5 -14  -7    7.70   11.10
  14   5   7   -0.80    6.60
   4 -14  -7   -7.70    9.50
  14   4   7   -1.00    6.60
   3 -14  -7   14.70   11.20
  14   3  -7   17.90    9.70
  14   3   7    3.10    7.00
  14   2  -7    0.00    9.30
   2 -14  -7    2.40    9.90
  14   2   7   -7.00    5.90
  14   1  -7   24.60   10.30
   1 -14  -7   -1.90    9.80
  14   1   7    0.00    6.30
  14   0  -7    6.40   10.00
   0 -14  -7  -15.30    9.10
  14   0   7    0.70    5.80
  14  -1  -7   -5.20    9.40
  -1 -14  -7   -2.00   10.60
  14  -1   7   -1.90    5.50
  14  -2  -7   -5.50    8.70
  -2 -14  -7    3.70   11.60
  14  -2   7    2.30    5.70
  14  -3  -7    0.50   10.00
  -3 -14  -7    9.50   12.80
  14  -3   7   -0.90    5.60
  -4 -14  -7   -9.90   11.00
  14  -4  -7    8.70   10.40
  -5 -14  -7   17.10   13.90
  14  -5  -7    7.30   10.90
   0   0  -8  186.58   23.00
   0  -1  -8   14.70   11.10
   0   1  -8   20.70   11.20
  -1   0  -8   20.90   11.20
   1   0  -8   28.70   11.00
   1  -1  -8   24.00   11.10
  -1   1  -8   28.00   11.50
   1   1  -8   13.20   10.30
  -1  -1  -8   11.20   10.80
   1  -2  -8   44.40   12.60
  -2  -1  -8   47.70   13.30
   2   1  -8   55.39   13.60
  -1   2  -8   40.80   12.60
   2   0  -8   40.70   12.30
  -2   0  -8   23.80   11.80
   0  -2  -8   56.59   13.50
   0   2  -8   47.90   12.50
  -2   1  -8   22.00   11.40
   2  -1  -8   34.50   12.20
  -1  -2  -8   33.50   11.80
   1   2  -8   33.20   12.10
  -2   2  -8   14.80   10.30
   2   2  -8   14.80   10.30
  -2  -2  -8   14.00   10.60
   2  -2  -8   23.10   11.10
   2  -3  -8   11.00    9.90
  -3  -2  -8    5.60   10.00
   3   2  -8   16.60   10.60
   3   1  -8    3.60    9.00
  -3  -1  -8    8.50   10.60
   1  -3  -8   21.30   10.70
  -3   0  -8   24.20   11.60
   3   0  -8   12.70    9.40
   0  -3  -8   29.50   11.30
   3  -1  -8   15.30    9.90
  -1  -3  -8   13.40   10.80
  -3   1  -8   20.70   11.20
  -2  -3  -8   11.50   10.60
   3  -2  -8   35.60   10.70
  -3   2  -8    4.70   10.20
  -3  -3  -8    6.00   10.80
   3  -3  -8   16.80   10.20
   3  -4  -8   12.50   10.60
  -4  -3  -8   20.20   12.30
  -4  -2  -8   56.49   14.30
   4   2  -8   70.89   14.10
   2  -4  -8   47.50   14.00
   4   1  -8   13.90    9.90
   1  -4  -8   14.20   11.00
  -4  -1  -8   18.10   11.60
  -4   0  -8   32.60   12.70
   0  -4  -8   21.20   11.70
   4   0  -8   29.70   10.80
  -1  -4  -8   13.50   10.80
   4  -1  -8   16.50    9.70
  -4   1  -8   -0.40   10.30
  -2  -4  -8   -0.60   10.60
   4  -2  -8   11.30    9.00
  -4   2  -8    4.00   11.10
   4  -3  -8    1.10    9.10
  -3  -4  -8    7.00   10.90
  -4  -4  -8   -5.40   10.40
   4  -4  -8    0.00    8.90
  -5  -4  -8    7.10   11.20
   4  -5  -8   -0.10    8.90
   3  -5  -8    5.70    9.20
  -5  -3  -8    4.20   11.10
   2  -5  -8   -1.50    9.50
   5   2  -8   -3.30    8.40
  -5  -2  -8   12.80   11.40
  -5  -1  -8   15.10   11.70
   1  -5  -8   21.40   11.10
   5   1  -8    9.40    9.10
   5   0  -8   22.50   10.10
  -5   0  -8   11.70   12.00
   0  -5  -8    8.70   10.80
  -5   1  -8    5.20   11.80
   5  -1  -8   13.90    9.20
  -1  -5  -8    8.10   10.60
  -2  -5  -8   -5.30    9.70
   5  -2  -8   13.10    9.40
  -3  -5  -8    6.10   10.80
   5  -3  -8   12.40   10.10
   5  -4  -8   -1.40    9.10
  -4  -5  -8    8.10   11.60
  -5  -5  -8   -7.30   10.30
   5  -5  -8   13.60   10.20
   5  -6  -8   13.40   10.50
  -6  -5  -8   -3.80   11.10
  -6  -4  -8    6.50   11.50
   4  -6  -8   18.30   10.60
  -6  -3  -8   -4.00   11.30
   3  -6  -8    4.40   10.10
   2  -6  -8   17.40   11.70
   6   2  -8   20.00    9.80
  -6  -2  -8   21.40   13.00
   6   1  -8   16.70    9.50
  -6  -1  -8   15.80   12.80
   1  -6  -8    0.90   10.00
   6   0  -8   28.80   10.50
   0  -6  -8    3.90   10.50
  -1  -6  -8   -1.30   10.10
   6  -1  -8    9.50    9.00
   6  -1   8    2.50    6.60
   6  -2  -8   12.60    9.80
  -2  -6  -8   10.40   12.30
   6  -2   8    9.10    6.80
   6  -3  -8   17.10   10.70
  -3  -6  -8    3.60   11.10
   6  -4  -8   36.00   12.30
  -4  -6  -8   21.60   12.90
  -5  -6  -8   14.40   12.10
   6  -5  -8    4.20    9.10
  -6  -6  -8    8.00   11.70
   6  -6  -8    7.80    9.50
  -7  -6  -8   -5.70   11.30
   6  -7  -8   17.40   10.70
   5  -7  -8    3.70    9.30
  -7  -5  -8    5.20   11.60
   4  -7  -8   15.30    9.90
  -7  -4  -8    6.20   11.60
   3  -7  -8   -2.50    8.50
   2  -7  -8   10.60   10.30
   7   2  -8   15.80    9.00
   7   2   8    1.90    6.80
   1  -7  -8    3.50    9.40
   7   1  -8   13.90    9.10
   7   1   8    8.40    7.30
   7   0  -8    6.80    8.80
   0  -7  -8    7.00    9.90
   7   0   8   -2.80    6.50
   7  -1  -8   15.50    9.40
  -1  -7  -8   15.90   11.00
   7  -1   8    0.20    6.40
   7  -2  -8   14.10    9.90
  -2  -7  -8    8.50   10.90
   7  -2   8    3.40    6.20
   7  -3  -8    5.60    9.50
  -3  -7  -8    5.10   11.10
   7  -4  -8   -0.90    9.00
  -4  -7  -8   -1.40   10.30
   7  -5  -8   -1.70    9.30
  -5  -7  -8   -0.70   10.40
   7  -6  -8    5.50   10.10
  -6  -7  -8    5.70   11.60
   7  -7  -8    6.70    9.40
  -7  -7  -8   -2.30   10.70
   7  -8  -8    9.70   10.40
   8   7   8   16.10    8.60
   6  -8  -8    9.20   10.00
   8   6   8   17.30    8.30
   5  -8  -8   -1.40    9.30
   8   5   8   11.70    8.10
   4  -8  -8   11.10   11.00
   8   4   8   20.30    8.60
   3  -8  -8    4.60   10.20
   8   3   8   14.10    8.00
   8   2  -8   16.50    9.40
   2  -8  -8    2.50   10.50
   8   2   8    3.00    7.40
   1  -8  -8    6.20   10.70
   8   1  -8   17.50    9.50
   8   1   8   10.50    7.70
   8   0  -8    1.00    8.20
   0  -8  -8    5.80   10.50
   8   0   8   -5.70    6.20
  -1  -8  -8   -0.80   10.20
   8  -1  -8    5.50    8.60
   8  -1   8   -1.80    6.20
  -2  -8  -8    3.70   11.50
   8  -2  -8    6.70    9.20
   8  -2   8    4.30    6.20
  -3  -8  -8   -0.60   11.00
   8  -3  -8   10.90   10.40
   8  -4  -8    3.50    9.70
  -4  -8  -8    4.20   11.50
   8  -5  -8    6.80   10.10
  -5  -8  -8    1.40   11.80
  -6  -8  -8   12.20   12.50
   8  -6  -8    3.70    9.70
   8  -7  -8   -0.60    9.50
  -7  -8  -8   18.50   13.50
   8  -8  -8   23.00   11.90
   8   8   8   22.90    9.50
   7  -9  -8    1.50    9.20
   6  -9  -8   15.20   10.90
   9   6   8   20.50    9.10
   5  -9  -8   -6.70    9.40
   9   5   8    7.70    8.10
   4  -9  -8    6.80   10.50
   9   4   8    8.10    8.20
   3  -9  -8   -4.60    9.20
   9   3   8   -0.10    6.90
   2  -9  -8   22.30   12.50
   9   2  -8   11.50    9.60
   9   2   8   20.30    8.40
   1  -9  -8    7.80   11.00
   9   1  -8    9.50    8.80
   9   1   8    7.40    7.20
   0  -9  -8   10.70   11.10
   9   0  -8    1.80    8.80
   9   0   8    1.00    6.90
   9  -1  -8   14.50   10.30
  -1  -9  -8   10.40   10.90
   9  -1   8   -6.00    5.80
   9  -2  -8    4.20    9.60
  -2  -9  -8    5.30   11.20
   9  -2   8    1.80    6.10
   9  -3  -8    3.40    9.90
  -3  -9  -8   -1.30   11.20
  -4  -9  -8    6.10   11.80
   9  -4  -8   -4.20    9.00
   9  -5  -8    3.10   10.20
  -5  -9  -8   -2.50   10.70
  -6  -9  -8   -1.60   11.10
   9  -6  -8   -0.40    9.50
  -7  -9  -8    4.10   12.00
   9  -7  -8   -9.00    8.70
   5 -10  -8   13.20   10.90
  10   5   8    1.40    7.70
   4 -10  -8   20.70   12.00
  10   4   8   21.60    9.10
   3 -10  -8   -4.20    9.20
  10   3   8    6.00    7.50
  10   2  -8   56.39   16.10
   2 -10  -8   34.20   13.30
  10   2   8   69.79   11.50
  10   1  -8    9.90    9.40
   1 -10  -8   -3.70   10.00
  10   1   8   -1.10    6.60
   0 -10  -8   -3.20    9.80
  10   0  -8   13.50   10.50
  10   0   8    0.70    6.70
  -1 -10  -8    7.90   11.20
  10  -1  -8   14.70   10.70
  10  -1   8    6.40    6.90
  -2 -10  -8   21.10   12.60
  10  -2  -8   12.40   10.80
  10  -2   8   19.30    7.80
  -3 -10  -8   18.70   13.30
  10  -3  -8   13.50   10.40
  -4 -10  -8   -4.20   11.40
  10  -4  -8    7.20   10.50
  10  -5  -8    4.20   10.20
  -5 -10  -8   26.80   14.20
   3 -11  -8    2.80   11.10
   2 -11  -8   12.90   12.00
  11   2   8    1.50    7.30
  11   1  -8   11.40    9.50
   1 -11  -8  -11.80    9.50
  11   1   8    4.30    7.10
   0 -11  -8   -0.60   10.80
  11   0  -8    9.60   10.00
  11   0   8    9.90    7.70
  -1 -11  -8   -9.40   10.20
  11  -1  -8    7.80    9.80
  11  -1   8   -3.00    6.20
  11  -2  -8   11.60   10.00
  -2 -11  -8   -5.90   11.40
  11  -2   8    0.20    6.70
  11  -3  -8   13.60   11.10
  -3 -11  -8  -10.00   10.80
   0   0  -9    5.90   11.00
   1   0  -9    0.50   10.70
   0  -1  -9    9.70   11.80
  -1   0  -9    2.10   11.00
   1  -1  -9   10.30   11.40
  -1  -1  -9    6.40   11.50
  -2  -1  -9    7.70   11.40
   1  -2  -9    3.40   11.20
   0  -2  -9   -5.60   10.30
   2   0  -9    0.10    9.80
  -2   0  -9    2.30   11.00
   2  -1  -9    1.70   10.50
  -1  -2  -9    6.70   11.50
   2  -2  -9    3.10   10.80
  -2  -2  -9    6.40   11.50
  -3  -2  -9    7.80   11.70
   2  -3  -9   -4.50   10.10
  -3  -1  -9    5.10   11.20
   1  -3  -9   -4.70   10.30
   0  -3  -9   14.50   11.90
   3   0  -9   13.40   11.20
  -3   0  -9   24.80   12.00
  -1  -3  -9    0.00   10.80
   3  -1  -9    2.90   10.90
  -2  -3  -9    0.60   11.40
   3  -2  -9   14.00   11.30
  -3  -3  -9   29.40   13.20
   3  -3  -9   -1.90    9.90
  -4  -3  -9    8.50   11.40
   3  -4  -9   12.00   11.10
  -4  -2  -9   16.10   12.20
   2  -4  -9   17.50   11.20
   1  -4  -9    9.40   11.00
  -4  -1  -9   14.80   12.10
  -4   0  -9    7.60   11.80
   0  -4  -9   -3.10    9.70
   4   0  -9    8.80   10.60
  -1  -4  -9    3.60   11.10
   4  -1  -9    7.90   11.10
   4  -2  -9   30.60   12.60
  -2  -4  -9    7.20   11.10
   4  -3  -9    6.80   10.60
  -3  -4  -9    7.40   11.60
  -5  -1  -9    8.40   12.50
   1  -5  -9   10.70   11.40
   5   0  -9   -1.90    9.20
   0  -5  -9    1.40   10.90
   5  -1  -9   13.30   11.10
  -1  -5  -9    5.20   11.20

_computing_structure_solution     'SHELXT 2014/4 (Sheldrick, 2014)'
;
_shelx_hkl_checksum                60753
_olex2_submission_special_instructions  'No special instructions were received'
