# Supplementary material for: Various Approaches to Studying the Phase Transition in an Octamethylcyclotetrasiloxane Crystal: From X-ray Structural Analysis to Metadynamics
Source: Int J Mol Sci. 2022 Aug 13;23(16):9073. doi: 10.3390/ijms23169073 (PMC9408834; doi:10.3390/ijms23169073)
Supplement: Supplementary file 1 [file ijms-23-09073-s001.zip › 1-11_210.cif]

data_210
_audit_creation_date               2021-12-16
_audit_creation_method
;
Olex2 1.5
(compiled 2021.12.09 svn.r5202d8cf for OlexSys, GUI svn.r6439)
;
_shelxl_version_number             2014/6
_audit_contact_author_address      ?
_audit_contact_author_email        ?
_audit_contact_author_name         ''
_audit_contact_author_phone        ?
_publ_contact_author_id_orcid      ?
_publ_section_references
;
Dolomanov, O.V., Bourhis, L.J., Gildea, R.J, Howard, J.A.K. & Puschmann, H.
 (2009), J. Appl. Cryst. 42, 339-341.

Sheldrick, G.M. (2015). Acta Cryst. C71, 3-8.
;
_chemical_name_common              ?
_chemical_name_systematic          ?
_chemical_formula_moiety           'C8 H24 O4 Si4'
_chemical_formula_sum              'C8 H24 O4 Si4'
_chemical_formula_weight           296.63
_chemical_melting_point            ?
loop_
  _atom_type_symbol
  _atom_type_description
  _atom_type_scat_dispersion_real
  _atom_type_scat_dispersion_imag
  _atom_type_scat_source
 'C' 'C' 0.0033 0.0016 'International Tables Vol C Tables 4.2.6.8 and 6.1.1.4'
 'H' 'H' 0.0000 0.0000 'International Tables Vol C Tables 4.2.6.8 and 6.1.1.4'
 'O' 'O' 0.0106 0.0060 'International Tables Vol C Tables 4.2.6.8 and 6.1.1.4'
 'Si' 'Si' 0.0817 0.0704 'International Tables Vol C Tables 4.2.6.8 and 6.1.1.4'

_shelx_space_group_comment
;
The symmetry employed for this shelxl refinement is uniquely defined
by the following loop, which should always be used as a source of
symmetry information in preference to the above space-group names.
They are only intended as comments.
;
_space_group_crystal_system        'tetragonal'
_space_group_IT_number             86
_space_group_name_H-M_alt          'P 42/n'
_space_group_name_Hall             '-P 4bc'
loop_
  _space_group_symop_operation_xyz
 'x, y, z'
 '-x+1/2, -y+1/2, z'
 '-y, x+1/2, z+1/2'
 'y+1/2, -x, z+1/2'
 '-x, -y, -z'
 'x-1/2, y-1/2, -z'
 'y, -x-1/2, -z-1/2'
 '-y-1/2, x, -z-1/2'

_cell_length_a                     16.051(2)
_cell_length_b                     16.051(2)
_cell_length_c                     6.4589(18)
_cell_angle_alpha                  90
_cell_angle_beta                   90
_cell_angle_gamma                  90
_cell_volume                       1664.0(6)
_cell_formula_units_Z              4
_cell_measurement_reflns_used      2972
_cell_measurement_temperature      210
_cell_measurement_theta_max        29.674
_cell_measurement_theta_min        2.538
_shelx_estimated_absorpt_T_max     0.901
_shelx_estimated_absorpt_T_min     0.842
_exptl_absorpt_coefficient_mu      0.355
_exptl_absorpt_correction_T_max    0.7461
_exptl_absorpt_correction_T_min    0.5582
_exptl_absorpt_correction_type     multi-scan
_exptl_absorpt_process_details
;
SADABS-2014/5 (Bruker,2014/5) was used for absorption correction.
wR2(int) was 0.1573 before and 0.0664 after correction.
The Ratio of minimum to maximum transmission is 0.7482.
The \l/2 correction factor is 0.00150.
;
_exptl_absorpt_special_details     ?
_exptl_crystal_colour              colourless
_exptl_crystal_colour_primary      colourless
_exptl_crystal_density_diffrn      1.184
_exptl_crystal_density_meas        .
_exptl_crystal_density_method      ?
_exptl_crystal_description         irregular
_exptl_crystal_F_000               640
_exptl_crystal_preparation         ?
_exptl_crystal_recrystallization_method  'in situ, in 0.3 mm capillary'
_exptl_crystal_size_max            0.5
_exptl_crystal_size_mid            0.3
_exptl_crystal_size_min            0.3
_exptl_transmission_factor_max     ?
_exptl_transmission_factor_min     ?
_diffrn_reflns_av_R_equivalents    0.0548
_diffrn_reflns_av_unetI/netI       0.0743
_diffrn_reflns_Laue_measured_fraction_full  0.988
_diffrn_reflns_Laue_measured_fraction_max  0.991
_diffrn_reflns_limit_h_max         23
_diffrn_reflns_limit_h_min         -16
_diffrn_reflns_limit_k_max         19
_diffrn_reflns_limit_k_min         -20
_diffrn_reflns_limit_l_max         8
_diffrn_reflns_limit_l_min         -9
_diffrn_reflns_number              10350
_diffrn_reflns_point_group_measured_fraction_full  0.988
_diffrn_reflns_point_group_measured_fraction_max  0.991
_diffrn_reflns_theta_full          25.242
_diffrn_reflns_theta_max           30.644
_diffrn_reflns_theta_min           1.794
_diffrn_ambient_temperature        210
_diffrn_detector                   'CCD area detector'
_diffrn_detector_area_resol_mean   8
_diffrn_detector_type              'Bruker SMART CCD 1K area detector'
_diffrn_measured_fraction_theta_full  0.988
_diffrn_measured_fraction_theta_max  0.991
_diffrn_measurement_device         'three-circle diffractometer'
_diffrn_measurement_device_type    'Bruker APEX-II CCD'
_diffrn_measurement_method         '\w and \f scans'
_diffrn_radiation_monochromator    graphite
_diffrn_radiation_probe            x-ray
_diffrn_radiation_type             MoK\a
_diffrn_radiation_wavelength       0.71073
_diffrn_source                     'sealed tube'
_diffrn_source_current             30.0
_diffrn_source_power               1.5
_diffrn_source_target              Mo
_diffrn_source_voltage             50.0
_diffrn_special_details            ?
_reflns_Friedel_coverage           0.000
_reflns_Friedel_fraction_full      .
_reflns_Friedel_fraction_max       .
_reflns_number_gt                  1372
_reflns_number_total               2557
_reflns_special_details
;
 Reflections were merged by SHELXL according to the crystal
 class for the calculation of statistics and refinement.
 
 _reflns_Friedel_fraction is defined as the number of unique
 Friedel pairs measured divided by the number that would be
 possible theoretically, ignoring centric projections and
 systematic absences.
;
_reflns_threshold_expression       'I > 2\s(I)'
_computing_cell_refinement         'SAINT v8.34A (Bruker, 2013)'
_computing_data_collection         ?
_computing_data_reduction          'SAINT v8.34A (Bruker, 2013)'
_computing_molecular_graphics      'Olex2 1.5 (Dolomanov et al., 2009)'
_computing_publication_material    'Olex2 1.5 (Dolomanov et al., 2009)'
_computing_structure_refinement    'SHELXL 2014/6 (Sheldrick, 2015)'
_computing_structure_solution      'ShelXT (Sheldrick, 2015)'
_refine_diff_density_max           0.420
_refine_diff_density_min           -0.259
_refine_diff_density_rms           0.068
_refine_ls_extinction_coef         .
_refine_ls_extinction_method       none
_refine_ls_goodness_of_fit_ref     1.042
_refine_ls_hydrogen_treatment      constr
_refine_ls_matrix_type             full
_refine_ls_number_parameters       77
_refine_ls_number_reflns           2557
_refine_ls_number_restraints       0
_refine_ls_R_factor_all            0.1260
_refine_ls_R_factor_gt             0.0611
_refine_ls_restrained_S_all        1.042
_refine_ls_shift/su_max            0.001
_refine_ls_shift/su_mean           0.000
_refine_ls_structure_factor_coef   Fsqd
_refine_ls_weighting_details      
 'w=1/[\s^2^(Fo^2^)+(0.0555P)^2^+0.9903P] where P=(Fo^2^+2Fc^2^)/3'
_refine_ls_weighting_scheme        calc
_refine_ls_wR_factor_gt            0.1366
_refine_ls_wR_factor_ref           0.1596
_refine_special_details            ?
_olex2_refinement_description
;
1.a Idealised Me refined as rotating group:
 C1(H1A,H1B,H1C), C2(H2A,H2B,H2C), C3(H3A,H3B,H3C), C4(H4A,H4B,H4C)
;
_atom_sites_solution_hydrogens     geom
_atom_sites_solution_primary       dual
_atom_sites_solution_secondary     ?
loop_
  _atom_site_label
  _atom_site_type_symbol
  _atom_site_fract_x
  _atom_site_fract_y
  _atom_site_fract_z
  _atom_site_U_iso_or_equiv
  _atom_site_adp_type
  _atom_site_occupancy
  _atom_site_site_symmetry_order
  _atom_site_calc_flag
  _atom_site_refinement_flags_posn
  _atom_site_refinement_flags_adp
  _atom_site_refinement_flags_occupancy
  _atom_site_disorder_assembly
  _atom_site_disorder_group
 Si1 Si 0.43219(4) 0.88518(4) 0.48927(13) 0.0306(2) Uani 1 1 d . . . . .
 Si2 Si 0.61165(4) 0.93574(4) 0.35944(14) 0.0332(2) Uani 1 1 d . . . . .
 O1 O 0.38853(12) 0.97590(11) 0.5165(3) 0.0404(6) Uani 1 1 d . . . . .
 O2 O 0.51883(11) 0.89626(12) 0.3613(4) 0.0435(6) Uani 1 1 d . . . . .
 C1 C 0.36197(17) 0.81904(18) 0.3330(6) 0.0429(8) Uani 1 1 d . . . . .
 H1A H 0.3118 0.8072 0.4116 0.064 Uiso 1 1 calc R U . . .
 H1B H 0.3899 0.7672 0.2992 0.064 Uiso 1 1 calc R U . . .
 H1C H 0.3473 0.8480 0.2064 0.064 Uiso 1 1 calc R U . . .
 C2 C 0.4538(2) 0.8400(2) 0.7474(6) 0.0512(9) Uani 1 1 d . . . . .
 H2A H 0.4918 0.8761 0.8223 0.077 Uiso 1 1 calc R U . . .
 H2B H 0.4788 0.7854 0.7311 0.077 Uiso 1 1 calc R U . . .
 H2C H 0.4021 0.8349 0.8242 0.077 Uiso 1 1 calc R U . . .
 C3 C 0.6851(2) 0.8655(2) 0.4908(7) 0.0607(11) Uani 1 1 d . . . . .
 H3A H 0.7397 0.8913 0.4957 0.091 Uiso 1 1 calc R U . . .
 H3B H 0.6885 0.8134 0.4153 0.091 Uiso 1 1 calc R U . . .
 H3C H 0.6658 0.8548 0.6306 0.091 Uiso 1 1 calc R U . . .
 C4 C 0.6420(2) 0.9519(2) 0.0861(6) 0.0584(10) Uani 1 1 d . . . . .
 H4A H 0.6025 0.9891 0.0201 0.088 Uiso 1 1 calc R U . . .
 H4B H 0.6423 0.8988 0.0144 0.088 Uiso 1 1 calc R U . . .
 H4C H 0.6973 0.9763 0.0805 0.088 Uiso 1 1 calc R U . . .

loop_
  _atom_site_aniso_label
  _atom_site_aniso_U_11
  _atom_site_aniso_U_22
  _atom_site_aniso_U_33
  _atom_site_aniso_U_23
  _atom_site_aniso_U_13
  _atom_site_aniso_U_12
 Si1 0.0261(4) 0.0260(4) 0.0397(5) -0.0064(3) 0.0034(3) -0.0049(3)
 Si2 0.0254(4) 0.0292(4) 0.0451(5) -0.0087(4) 0.0073(4) -0.0017(3)
 O1 0.0375(11) 0.0310(11) 0.0526(16) -0.0116(9) 0.0014(10) 0.0007(8)
 O2 0.0315(11) 0.0418(11) 0.0572(16) -0.0129(11) 0.0126(10) -0.0078(8)
 C1 0.0367(16) 0.0384(16) 0.053(2) -0.0095(15) -0.0048(15) -0.0073(12)
 C2 0.062(2) 0.0479(19) 0.044(2) 0.0011(16) -0.0019(17) -0.0009(16)
 C3 0.053(2) 0.049(2) 0.080(3) -0.0196(19) -0.010(2) 0.0165(16)
 C4 0.065(2) 0.062(2) 0.049(2) -0.0124(19) 0.0228(19) -0.0181(18)

_geom_special_details
;
 All esds (except the esd in the dihedral angle between two l.s. planes)
 are estimated using the full covariance matrix.  The cell esds are taken
 into account individually in the estimation of esds in distances, angles
 and torsion angles; correlations between esds in cell parameters are only
 used when they are defined by crystal symmetry.  An approximate (isotropic)
 treatment of cell esds is used for estimating esds involving l.s. planes.
;
loop_
  _geom_bond_atom_site_label_1
  _geom_bond_atom_site_label_2
  _geom_bond_distance
  _geom_bond_site_symmetry_2
  _geom_bond_publ_flag
 Si1 O1 1.625(2) . ?
 Si1 O2 1.628(2) . ?
 Si1 C1 1.848(3) . ?
 Si1 C2 1.851(4) . ?
 Si2 O1 1.629(2) 5_676 ?
 Si2 O2 1.6190(19) . ?
 Si2 C3 1.839(3) . ?
 Si2 C4 1.850(4) . ?
 O1 Si2 1.629(2) 5_676 ?
 C1 H1A 0.9700 . ?
 C1 H1B 0.9700 . ?
 C1 H1C 0.9700 . ?
 C2 H2A 0.9700 . ?
 C2 H2B 0.9700 . ?
 C2 H2C 0.9700 . ?
 C3 H3A 0.9700 . ?
 C3 H3B 0.9700 . ?
 C3 H3C 0.9700 . ?
 C4 H4A 0.9700 . ?
 C4 H4B 0.9700 . ?
 C4 H4C 0.9700 . ?

loop_
  _geom_angle_atom_site_label_1
  _geom_angle_atom_site_label_2
  _geom_angle_atom_site_label_3
  _geom_angle
  _geom_angle_site_symmetry_1
  _geom_angle_site_symmetry_3
  _geom_angle_publ_flag
 O1 Si1 O2 108.98(11) . . ?
 O1 Si1 C1 108.10(12) . . ?
 O1 Si1 C2 109.51(14) . . ?
 O2 Si1 C1 107.86(14) . . ?
 O2 Si1 C2 109.90(14) . . ?
 C1 Si1 C2 112.41(16) . . ?
 O1 Si2 C3 107.94(15) 5_676 . ?
 O1 Si2 C4 110.35(14) 5_676 . ?
 O2 Si2 O1 109.60(11) . 5_676 ?
 O2 Si2 C3 110.28(15) . . ?
 O2 Si2 C4 107.74(15) . . ?
 C3 Si2 C4 110.93(18) . . ?
 Si1 O1 Si2 146.50(15) . 5_676 ?
 Si2 O2 Si1 146.39(16) . . ?
 Si1 C1 H1A 109.5 . . ?
 Si1 C1 H1B 109.5 . . ?
 Si1 C1 H1C 109.5 . . ?
 H1A C1 H1B 109.5 . . ?
 H1A C1 H1C 109.5 . . ?
 H1B C1 H1C 109.5 . . ?
 Si1 C2 H2A 109.5 . . ?
 Si1 C2 H2B 109.5 . . ?
 Si1 C2 H2C 109.5 . . ?
 H2A C2 H2B 109.5 . . ?
 H2A C2 H2C 109.5 . . ?
 H2B C2 H2C 109.5 . . ?
 Si2 C3 H3A 109.5 . . ?
 Si2 C3 H3B 109.5 . . ?
 Si2 C3 H3C 109.5 . . ?
 H3A C3 H3B 109.5 . . ?
 H3A C3 H3C 109.5 . . ?
 H3B C3 H3C 109.5 . . ?
 Si2 C4 H4A 109.5 . . ?
 Si2 C4 H4B 109.5 . . ?
 Si2 C4 H4C 109.5 . . ?
 H4A C4 H4B 109.5 . . ?
 H4A C4 H4C 109.5 . . ?
 H4B C4 H4C 109.5 . . ?

loop_
  _geom_torsion_atom_site_label_1
  _geom_torsion_atom_site_label_2
  _geom_torsion_atom_site_label_3
  _geom_torsion_atom_site_label_4
  _geom_torsion
  _geom_torsion_site_symmetry_1
  _geom_torsion_site_symmetry_2
  _geom_torsion_site_symmetry_3
  _geom_torsion_site_symmetry_4
  _geom_torsion_publ_flag
 O1 Si1 O2 Si2 64.7(3) . . . . ?
 O1 Si2 O2 Si1 -33.4(3) 5_676 . . . ?
 O2 Si1 O1 Si2 -77.3(3) . . . 5_676 ?
 C1 Si1 O1 Si2 165.8(3) . . . 5_676 ?
 C1 Si1 O2 Si2 -178.2(3) . . . . ?
 C2 Si1 O1 Si2 43.0(3) . . . 5_676 ?
 C2 Si1 O2 Si2 -55.4(3) . . . . ?
 C3 Si2 O2 Si1 85.3(3) . . . . ?
 C4 Si2 O2 Si1 -153.5(3) . . . . ?

_shelx_res_file
;
TITL 200_a.res in P4(2)/n
REM Old TITL 200 in P4(2)/n
REM SHELXT solution in P4(2)/n
REM R1 0.156, Rweak 0.004, Alpha 0.023, Orientation as input
REM Formula found by SHELXT: C2 O Si
CELL 0.71073 16.0507 16.0507 6.4589 90 90 90
ZERR 4 0.002 0.002 0.0018 0 0 0
LATT 1
SYMM 0.5-X,0.5-Y,+Z
SYMM -Y,0.5+X,0.5+Z
SYMM 0.5+Y,-X,0.5+Z
SFAC C H O Si
UNIT 32 96 16 16

L.S. 4
PLAN  5
SIZE 0.3 0.3 0.5
TEMP -63.15
CONF
BOND $H
list 4
fmap 2
acta
MORE -1
OMIT 4 14 0
OMIT 5 10 1
OMIT -1 3 3
REM <olex2.extras>
REM <HklSrc "%.\\210.hkl">
REM </olex2.extras>

WGHT    0.055500    0.990300
FVAR       0.45414
SI1   4    0.432188    0.885179    0.489274    11.00000    0.02614    0.02604 =
         0.03969   -0.00638    0.00339   -0.00494
SI2   4    0.611650    0.935740    0.359445    11.00000    0.02543    0.02918 =
         0.04505   -0.00872    0.00730   -0.00173
O1    3    0.388534    0.975896    0.516472    11.00000    0.03748    0.03102 =
         0.05259   -0.01163    0.00138    0.00070
O2    3    0.518833    0.896263    0.361302    11.00000    0.03147    0.04176 =
         0.05716   -0.01291    0.01262   -0.00775
C1    1    0.361965    0.819038    0.333046    11.00000    0.03670    0.03844 =
         0.05345   -0.00948   -0.00485   -0.00726
AFIX 137
H1A   2    0.311836    0.807161    0.411560    11.00000   -1.50000
H1B   2    0.389935    0.767230    0.299172    11.00000   -1.50000
H1C   2    0.347268    0.848010    0.206409    11.00000   -1.50000
AFIX   0
C2    1    0.453779    0.840049    0.747409    11.00000    0.06199    0.04789 =
         0.04381    0.00110   -0.00193   -0.00090
AFIX 137
H2A   2    0.491773    0.876115    0.822287    11.00000   -1.50000
H2B   2    0.478796    0.785430    0.731081    11.00000   -1.50000
H2C   2    0.402086    0.834946    0.824164    11.00000   -1.50000
AFIX   0
C3    1    0.685098    0.865490    0.490800    11.00000    0.05303    0.04865 =
         0.08031   -0.01961   -0.01006    0.01652
AFIX 137
H3A   2    0.739730    0.891251    0.495726    11.00000   -1.50000
H3B   2    0.688502    0.813351    0.415339    11.00000   -1.50000
H3C   2    0.665809    0.854810    0.630628    11.00000   -1.50000
AFIX   0
C4    1    0.642047    0.951909    0.086138    11.00000    0.06492    0.06162 =
         0.04871   -0.01241    0.02275   -0.01814
AFIX 137
H4A   2    0.602513    0.989105    0.020119    11.00000   -1.50000
H4B   2    0.642271    0.898809    0.014436    11.00000   -1.50000
H4C   2    0.697296    0.976294    0.080538    11.00000   -1.50000
AFIX   0
HKLF 4

REM  200_a.res in P4(2)/n
REM R1 =  0.0611 for    1372 Fo > 4sig(Fo)  and  0.1260 for all    2557 data
REM     77 parameters refined using      0 restraints

END

WGHT      0.0555      0.9904

REM Highest difference peak  0.420,  deepest hole -0.259,  1-sigma level  0.068
Q1    1   0.5307  0.8883  0.4948  11.00000  0.05    0.42
Q2    1   0.5694  0.8964  0.3690  11.00000  0.05    0.37
Q3    1   0.6116  0.9478  0.5056  11.00000  0.05    0.36
Q4    1   0.3810  0.9223  0.5256  11.00000  0.05    0.33
Q5    1   0.6233  0.9411  0.2185  11.00000  0.05    0.33
;
_shelx_res_checksum                14336
_shelx_hkl_file
;
   0   1   0   -4.70    0.30
   0  -1   0   -3.60    0.30
  -1   1   0    2.30    0.40
  -1  -1   0    3.40    0.50
  -1   1   0    4.30    0.50
  -1  -1   0    2.50    0.50
   1  -2   0   -3.30    1.20
  -1   2   0   -6.00    1.10
   2   1   0   -7.90    1.10
  -2  -1   0   -7.10    1.20
  -2  -1   0   -7.90    1.10
   1  -2   0   -7.00    1.10
   2   0   0 3825.92  203.98
   0  -2   0 3960.70  204.68
   0  -2   0 4113.09  203.58
   0   2   0 4157.88  205.18
  -2   0   0 4342.77  205.18
   2   0   0 4082.99  205.88
  -2   0   0 3962.80  205.28
   1   2   0   -0.40    0.30
  -1  -2   0   -1.50    0.80
   1   2   0   -2.10    0.70
  -2  -2   0  141.09    8.40
   2   2   0  147.19    8.40
   2   2   0  144.09    7.90
  -2   2   0  152.68    8.10
   2  -2   0  148.69    7.90
   2  -2   0  143.69    8.10
   3   2   0   -0.90    0.70
   3   2   0   -1.80    0.80
  -2   3   0   -1.20    0.70
   2  -3   0   -1.60    0.70
  -3  -2   0   -1.60    0.90
   2  -3   0   -0.80    0.90
  -3  -1   0    1.00    1.00
  -1   3   0    0.40    0.70
   1  -3   0    1.30    1.00
  -1   3   0    0.00    0.90
   1  -3   0    2.10    0.90
   3   1   0    0.30    1.00
   3   1   0    2.00    0.80
   0  -3   0   -0.40    0.70
   3   0   0   -0.30    0.40
   0   3   0   -1.20    0.70
   0  -3   0   -1.20    0.70
   0   3   0   -0.50    0.60
  -3   0   0   -0.20    0.60
   3   0   0   -0.20    0.50
   1   3   0   -0.40    0.60
   3  -1   0   -0.20    0.60
  -3   1   0   -0.10    0.60
  -1  -3   0   -0.40    0.70
   3  -1   0    0.20    0.50
  -1  -3   0   -0.60    0.90
   3  -2   0   -0.90    0.70
  -3  -3   0    5.40    2.10
   3   3   0    4.00    1.60
   4   3   0    0.60    1.40
   4   3   0   -0.40    1.10
   3  -4   0    0.70    1.20
  -3   4   0   -0.30    1.00
  -4  -3   0    4.30    1.80
   3  -4   0   -1.60    1.20
   2  -4   0 9675.43  490.65
   4   2   0 9843.32  491.35
   4   2   0 9754.02  494.95
   2  -4   0 9742.93  492.55
  -4  -2   0 9999.00  495.85
  -2   4   0 9821.92  493.15
   4   0   0 5305.67  274.77
   0  -4   0 5402.36  274.17
  -4   0   0 5504.35  277.17
   0   4   0 5755.62  273.77
   4   0   0 5558.84  277.47
   0   4   0 5345.27  276.67
   0  -4   0 5437.86  273.57
   4  -1   0   -0.80    1.30
  -4   1   0   -1.70    1.10
  -2  -4   0  286.47   16.00
   2   4   0  287.47   15.80
  -4   2   0  271.47   15.40
   4  -2   0  308.77   15.10
   2   4   0  281.57   15.00
   4  -2   0  264.47   15.50
   4  -3   0   -0.90    1.10
  -3  -4   0   -0.30    1.20
   3   4   0    0.40    1.10
   4  -3   0   -0.90    1.10
  -4   3   0    0.10    1.10
   3   4   0   -0.30    1.10
   4  -4   0 1158.28   58.99
   4  -4   0 1177.28   58.59
   4   4   0 1129.19   59.49
  -4  -4   0 1149.98   59.59
   4   4   0 1111.99   58.49
  -4   4   0 1199.98   58.99
   5   4   0   -1.70    1.60
   5   4   0    0.30    1.30
  -4   5   0   -1.30    1.10
  -5  -4   0   -1.90    1.50
   4  -5   0    1.00    1.30
   3  -5   0    7.60    1.90
  -5  -3   0    6.40    2.10
   5   3   0   11.00    1.90
   5   3   0   10.50    2.60
  -3   5   0   10.40    2.00
   3  -5   0   13.60    2.30
  -2   5   0   -3.70    1.20
   2  -5   0   -2.50    1.20
  -5  -2   0   -4.90    1.20
   5   2   0   -2.70    1.10
   2  -5   0   -1.60    1.40
   5   2   0   -2.70    1.40
   1  -5   0    9.50    2.10
  -1   5   0    6.90    2.10
  -5  -1   0    5.30    2.00
   5   1   0    7.80    2.30
   5   1   0   10.70    2.00
   1  -5   0    5.20    1.90
  -5   0   0    1.90    1.30
   5   0   0    1.20    1.50
   0   5   0    0.40    1.50
   5   0   0    0.40    1.00
   0  -5   0    1.10    1.50
   0  -5   0    1.20    1.80
  -1  -5   0   25.30    3.70
   5  -1   0   24.10    2.70
   5  -1   0   24.50    3.20
  -1  -5   0   27.00    3.20
  -5   1   0   25.40    3.00
  -1  -5   0   26.80    3.80
   5  -2   0   -1.20    1.10
  -2  -5   0    1.10    1.90
  -5   2   0   -0.70    1.00
   5  -2   0    1.50    1.30
  -3  -5   0   68.39    5.80
  -5   3   0   66.59    5.00
   5  -3   0   66.29    4.90
   5  -3   0   62.29    5.20
   3   5   0   84.49    5.90
   5  -4   0   -0.10    1.30
   4   5   0   -0.50    1.30
  -5   4   0   -0.50    1.10
  -4  -5   0   -0.20    1.30
   5  -4   0    0.60    1.30
  -5   5   0    7.90    2.10
   5  -5   0   10.70    2.40
  -5  -5   0   12.60    3.10
   5  -5   0   11.80    2.30
   5   5   0    8.30    1.90
   5   5   0    7.40    2.40
   5  -6   0   -2.00    1.90
   6   5   0    5.60    1.60
   6   5   0    5.40    2.10
  -5   6   0   -0.80    1.30
   5  -6   0   -1.90    1.30
  -6  -5   0    2.10    1.90
  -4   6   0 1125.69   57.39
   4  -6   0 1126.39   57.39
  -6  -4   0 1113.19   58.19
   6   4   0 1126.29   58.19
   6   4   0 1079.99   56.69
   4  -6   0 1126.79   56.99
   6   3   0   -2.30    1.20
   3  -6   0   -0.10    1.50
  -6  -3   0    0.00    1.40
   3  -6   0   -0.60    1.20
  -3   6   0    0.70    1.40
   6   3   0   -0.90    1.50
  -6  -2   0 1762.02   90.19
   2  -6   0 1762.92   89.69
  -2   6   0 1772.42   89.89
   6   2   0 1762.32   90.29
   2  -6   0 1764.82   89.29
   6   2   0 1796.32   89.19
   1  -6   0   -4.30    1.60
  -1   6   0   -1.90    1.40
   6   1   0   -0.60    1.20
  -6  -1   0   -3.20    1.30
   6   1   0   -2.50    1.50
   1  -6   0   -2.20    1.40
   6   0   0  154.08    8.70
  -6   0   0  158.28    9.60
   6   0   0  155.98    9.80
   0  -6   0  150.38    9.50
   0  -6   0  138.39    9.20
   0   6   0  152.08    9.70
   6  -1   0    1.00    1.80
   6  -1   0   -1.10    1.30
  -1  -6   0   -4.60    1.80
  -1  -6   0   -2.40    2.10
  -1  -6   0   -3.70    2.10
  -6   1   0   -2.70    1.40
   6  -2   0   -1.50    1.50
  -2  -6   0   -1.00    3.00
  -2  -6   0    3.70    2.30
  -2  -6   0    7.60    2.80
  -6   2   0    1.80    1.60
   6  -2   0    2.00    1.90
   3   6   0   -0.10    1.40
   6  -3   0   -0.90    1.30
  -6   3   0   -2.70    1.20
   3   6   0   -0.20    1.30
   6  -3   0    5.00    1.60
  -3  -6   0   -0.40    1.80
  -4  -6   0  818.32   45.70
   4   6   0  800.52   45.40
   6  -4   0  936.81   45.40
   4   6   0  832.02   44.40
   6  -4   0  872.71   44.60
  -6   4   0  941.11   45.20
  -6   5   0   -1.00    1.20
   5   6   0   -1.80    1.50
   5   6   0    0.80    1.80
   6  -5   0   -0.60    1.40
   6  -5   0   -0.60    1.60
  -5  -6   0    0.40    2.00
   6   6   0  108.19    8.50
   6  -6   0  126.79    7.90
   6   6   0  108.39    7.30
   6  -6   0  109.39    7.90
  -6  -6   0  106.49    8.90
  -6   6   0  107.29    7.70
   7   6   0    1.10    2.10
   6  -7   0   -1.00    1.70
   6  -7   0    1.00    2.20
  -6   7   0   -2.40    1.50
   7   6   0    2.10    1.80
  -7  -6   0   -1.60    1.90
   5  -7   0   -1.60    1.70
  -7  -5   0    0.20    2.00
   7   5   0   -0.40    1.50
   5  -7   0   -1.20    2.10
   7   5   0   -1.10    1.80
  -5   7   0   -1.60    1.40
  -7  -4   0    1.10    1.90
   7   4   0   -1.10    1.70
   7   4   0   -0.40    1.50
  -4   7   0   -0.90    1.40
   4  -7   0   -1.10    2.10
   4  -7   0   -2.10    1.40
   7   3   0   18.10    3.30
   7   3   0   15.80    2.50
  -7  -3   0   17.30    3.20
   3  -7   0   16.80    2.90
  -3   7   0   16.30    3.10
   2  -7   0    0.80    2.20
  -7  -2   0   -1.60    1.50
   7   2   0   -3.10    1.30
   2  -7   0    6.00    2.00
   7   2   0   -0.80    1.70
   7   1   0    0.00    1.60
   1  -7   0   -1.60    1.50
  -7  -1   0    1.60    1.60
   1  -7   0    1.70    2.10
  -1   7   0   -1.00    1.70
   7   1   0    1.40    1.30
   7   0   0    2.30    1.30
   7   0   0   -0.20    1.50
  -7   1   0   19.20    3.00
   7  -1   0   20.20    2.90
   7  -1   0   16.60    3.10
  -1  -7   0   33.60    4.70
  -1  -7   0   24.50    3.70
  -7   2   0   -1.00    1.30
  -2  -7   0   -3.40    2.70
  -2  -7   0   -0.40    2.30
   7  -2   0   -1.40    1.50
  -2  -7   0   -1.30    1.90
   7  -2   0   -0.60    1.30
  -3  -7   0    5.70    2.60
   7  -3   0    2.20    2.00
   7  -3   0    3.70    1.80
  -7   3   0    3.50    1.80
  -3  -7   0    2.00    2.90
   3   7   0    2.70    1.60
  -5  -7   0    1.20    2.20
   5   7   0    3.60    2.00
   7  -5   0    3.00    1.90
  -7   5   0    3.90    1.90
   5   7   0    0.60    2.10
   7  -5   0    0.90    2.00
   6   7   0   -4.70    1.60
   6   7   0   -2.00    1.80
   7  -6   0   -2.40    1.90
  -7   6   0   -2.10    1.50
  -6  -7   0    0.70    2.50
   7  -6   0   -0.60    1.90
  -7  -7   0   29.90    5.00
   7  -7   0   37.70    5.20
   7   7   0   41.20    5.80
   7  -7   0   33.80    4.60
  -7   7   0   30.50    4.50
   7   7   0   37.80    4.70
   8   7   0   -1.70    2.00
   7  -8   0   -1.60    2.30
  -7   8   0   -0.10    2.00
   8   7   0   -0.70    2.00
   7  -8   0    3.00    2.90
  -8  -7   0   -0.30    2.60
   6  -8   0  360.76   19.50
  -6   8   0  324.87   19.60
   6  -8   0  336.17   19.60
   8   6   0  335.07   20.50
  -8  -6   0  349.07   20.80
   8   6   0  334.77   18.90
  -8  -5   0    3.60    2.80
   8   5   0   -2.20    1.90
   8   5   0   -2.20    2.20
  -5   8   0   -3.60    2.00
   5  -8   0   -3.60    2.00
   4  -8   0 1758.82   89.49
   8   4   0 1760.82   90.89
   8   4   0 1749.72   89.09
  -8  -4   0 1757.22   90.69
   4  -8   0 1805.72   89.99
  -4   8   0 1728.53   89.99
   8   3   0   -1.20    2.00
  -3   8   0   -0.90    1.80
   8   3   0    1.40    1.70
   3  -8   0   -0.80    2.10
   3  -8   0   -1.90    1.60
  -8  -3   0   -0.40    2.00
   2  -8   0  905.51   46.30
   8   2   0  880.21   45.40
   2  -8   0  870.21   45.90
   8   2   0  891.31   47.00
  -8  -2   0  893.31   46.90
  -2   8   0  859.11   46.50
   8   1   0   -0.90    1.30
   1  -8   0   -2.60    1.90
  -1   8   0    0.10    1.90
   1  -8   0   -1.30    1.70
  -8  -1   0   -1.80    1.60
   8   1   0    2.60    2.00
   8   0   0   85.39    6.10
   8   0   0   83.69    7.40
   0   8   0   92.69    7.40
   0  -8   0   85.69    7.00
   0  -8   0   99.79    7.50
  -8   0   0   92.69    7.20
  -1  -8   0   -1.20    2.20
   8  -1   0   -0.40    1.40
  -1  -8   0   -2.30    2.60
  -8   1   0   -1.80    1.50
   8  -1   0    0.70    1.80
  -1  -8   0   -1.10    1.90
   8  -2   0  271.07   16.10
  -2  -8   0  265.07   16.30
   8  -2   0  268.97   14.90
  -8   2   0  282.37   15.80
  -2  -8   0  250.17   16.30
  -2  -8   0  255.07   15.90
  -8   3   0    0.20    1.60
  -3  -8   0    1.30    2.40
   3   8   0   -0.40    1.70
   8  -3   0   -3.80    1.80
   8  -3   0   -1.10    1.80
   4   8   0  835.72   41.60
  -8   4   0  802.42   42.30
   8  -4   0  778.62   41.70
  -4  -8   0  826.52   43.50
   8  -4   0  775.92   42.70
   5   8   0   -2.40    1.80
   8  -5   0   -0.60    2.00
   5   8   0   -1.10    2.10
  -8   5   0   -1.10    1.60
  -5  -8   0   -0.20    2.40
   8  -5   0    0.30    2.20
   8  -6   0    8.80    2.90
  -8   6   0    5.10    2.30
  -6  -8   0    7.60    4.00
   8  -6   0    6.60    2.90
   6   8   0    4.00    2.90
   6   8   0    5.40    2.50
  -8   7   0   -2.10    2.00
  -7  -8   0   -1.80    2.90
   7   8   0   -1.60    2.00
   8  -7   0   -3.50    2.30
   8  -7   0    0.60    2.50
   7   8   0   -0.80    2.20
   8   8   0 1411.96   79.59
   8   8   0 1504.45   77.89
   8  -8   0 1547.75   79.19
  -8   8   0 1541.55   78.99
   8  -8   0 1592.84   78.59
  -8  -8   0 1559.64   80.39
  -8   9   0   -1.00    2.70
   8  -9   0   -2.40    2.50
   9   8   0   -2.00    3.10
   9   8   0   -1.70    2.70
   8  -9   0   -3.50    3.70
  -9  -8   0    1.20    3.50
  -7   9   0   66.69    7.10
   6  -9   0   -6.80    3.10
   9   6   0    4.90    2.50
  -6   9   0   -2.20    2.10
   6  -9   0   -2.60    2.20
  -9  -6   0   -0.90    2.80
   9   6   0   -3.60    2.50
   9   5   0   16.10    3.10
   9   5   0   16.80    4.50
  -9  -5   0   24.20    4.50
   5  -9   0   12.30    3.30
  -5   9   0   18.70    3.80
   5  -9   0    8.90    3.80
   4  -9   0   -6.00    2.60
   4  -9   0   -2.40    1.90
   9   4   0    0.80    2.40
  -9  -4   0    5.00    2.60
  -4   9   0   -1.60    2.20
   9   4   0    4.60    2.10
  -3   9   0    7.60    3.00
   3  -9   0   12.60    3.70
   3  -9   0    6.00    2.40
   9   3   0    6.70    2.30
   9   3   0    7.80    2.90
  -9  -3   0    4.80    2.80
   2  -9   0   -2.30    2.50
   9   2   0   -0.40    1.60
  -2   9   0    1.20    2.00
   2  -9   0   -1.00    2.10
   9   2   0   -0.90    2.10
  -9  -2   0    0.00    1.80
   1  -9   0   31.90    4.60
  -9  -1   0   36.60    5.00
   1  -9   0   34.60    4.50
   9   1   0   33.70    4.00
   9   1   0   45.80    5.90
  -1   9   0   29.90    4.70
   9  -2   0   -0.50    2.20
  -2  -9   0    1.50    2.50
  -9   2   0    0.20    1.80
   9  -2   0   -3.70    1.70
  -2  -9   0   -1.00    2.80
  -2  -9   0   -0.90    3.40
   3   9   0    2.80    2.30
  -9   3   0    4.80    2.30
   9  -3   0    6.20    2.40
   9  -3   0    4.40    2.80
  -3  -9   0    0.60    4.20
  -3  -9   0    3.40    3.80
   4   9   0    5.10    2.40
  -4  -9   0    2.90    3.80
   9  -4   0   -2.70    2.00
  -9   4   0   -1.30    1.80
   9  -5   0    6.10    2.90
   5   9   0   13.30    3.10
  -9   5   0    2.40    2.40
   9  -5   0    5.50    2.80
  -5  -9   0   14.10    3.70
   6   9   0   -1.30    2.00
  -6  -9   0   -3.50    2.90
   9  -6   0    1.40    2.60
   9  -6   0   -4.00    2.40
  -9   6   0   -1.00    2.00
   6   9   0   -0.70    2.70
  -7  -9   0    3.60    4.60
   7   9   0    9.00    2.90
  -9   7   0    1.60    2.70
   9  -7   0    1.00    3.20
   7   9   0    5.80    3.70
   9  -7   0    2.60    3.00
   9  -8   0    2.60    3.00
  -9   8   0    4.20    2.90
   9   9   0    1.70    3.30
  -9   9   0    4.20    2.90
   9  -9   0   -1.40    3.80
  -9  -9   0    1.30    3.90
   9  -9   0   -2.10    2.80
   9   9   0    2.50    3.10
  10   9   0    2.10    3.20
   9 -10   0   -2.60    3.90
  10   8   0 1106.79   60.79
  10   8   0 1116.39   58.39
 -10  -8   0 1124.49   61.09
  -8  10   0 1140.59   59.79
   8 -10   0 1124.59   59.69
   8 -10   0 1151.28   59.39
 -10  -7   0   -1.10    3.20
  10   7   0   -2.10    2.90
  -7  10   0    1.80    3.10
   7 -10   0   -1.20    2.50
  10   7   0   -1.30    2.60
   6 -10   0  469.15   26.90
  -6  10   0  458.05   27.00
  10   6   0  465.65   25.80
 -10  -6   0  477.25   28.10
  10   6   0  505.35   28.30
   6 -10   0  467.45   27.00
  10   5   0    0.50    2.20
  10   5   0   -5.70    2.80
   5 -10   0   -4.70    2.30
   5 -10   0    3.40    3.40
 -10  -5   0   -1.00    3.30
  -5  10   0   -0.90    2.60
   4 -10   0 2279.97  116.29
  -4  10   0 2238.68  116.99
 -10  -4   0 2319.07  117.89
  10   4   0 2317.07  115.69
  10   4   0 2290.27  117.89
   4 -10   0 2288.77  116.79
   3 -10   0   -3.60    3.50
  10   3   0    7.50    3.20
 -10  -3   0    5.30    2.80
   3 -10   0   -1.10    2.40
  -3  10   0   -1.10    2.70
  10   3   0    6.10    2.40
   2 -10   0 2489.75  130.09
  10   2   0 2515.95  131.59
 -10  -2   0 2683.83  131.49
   2 -10   0 2604.64  130.69
  -2  10   0 2572.14  131.19
  10   2   0 2555.64  129.59
  10   1   0    0.40    2.70
   1 -10   0   -3.10    3.20
 -10  -1   0   -3.90    2.30
  -1  10   0   -1.50    3.00
  10   1   0    0.50    2.10
   1 -10   0    8.40    3.30
  10   0   0   27.20    5.00
 -10   0   0   40.90    5.60
  10   0   0   36.40    4.50
   0 -10   0   31.00    5.00
   0 -10   0   30.80    5.10
  10  -1   0   -1.90    2.00
  10  -1   0   -1.60    2.30
  -1 -10   0    9.50    4.10
 -10   1   0   -2.50    2.20
  -1 -10   0    1.00    2.80
  -1 -10   0    1.40    4.30
  10  -2   0  184.18   11.90
  -2 -10   0  230.18   14.20
 -10   2   0  190.98   13.00
  10  -2   0  173.38   13.30
  -2 -10   0  210.38   13.90
  -2 -10   0  207.78   14.40
 -10   3   0    0.80    2.00
  -3 -10   0   -4.70    3.60
  10  -3   0   -2.00    2.40
   3  10   0    0.20    2.30
  -3 -10   0   -3.60    4.30
  10  -3   0    2.20    2.80
  10  -4   0  172.98   13.90
 -10   4   0  179.38   13.20
   4  10   0  236.38   12.90
  -4 -10   0  265.57   15.80
  10  -5   0    0.40    2.50
   5  10   0    4.10    2.50
  -5 -10   0    3.00    3.40
  10  -5   0    1.30    2.70
  -5 -10   0   -1.30    3.80
 -10   5   0   -2.60    2.20
 -10   6   0   46.90    6.40
  10  -6   0   51.89    6.90
   6  10   0   50.09    6.50
  -6 -10   0   49.00    7.70
  10  -6   0   49.99    6.80
   7  10   0   11.80    3.20
  -7 -10   0   -1.40    4.30
  10  -7   0   -1.90    3.00
   7  10   0   -1.80    3.20
  10  -8   0   99.19    9.30
   8  10   0   96.39   10.30
 -10   8   0   93.49    8.70
  10  -8   0  101.29    9.60
   8  10   0   95.99    8.20
  -8 -10   0   93.39   11.00
  10  -9   0    4.50    3.40
  10  -9   0    0.00    4.00
 -10   9   0   -1.30    2.60
   9  10   0   -2.70    2.80
   9  10   0    1.50    3.50
  -9 -10   0   -3.50    3.40
  10  10   0   34.70    5.00
  10  10   0   25.70    5.70
  10 -10   0   27.40    5.90
 -10 -10   0   26.80    6.40
  11  10   0    1.90    2.90
  10 -11   0   -5.60    3.80
  11   9   0   24.10    4.20
  11   9   0   21.00    6.20
 -11  -9   0   21.60    5.50
   9 -11   0   16.00    5.20
  11   8   0   -3.90    2.80
 -11  -8   0    6.90    3.70
   8 -11   0  -10.50    3.70
  -8  11   0   -3.60    2.70
  11   8   0   -4.60    2.70
  11   7   0    1.60    3.40
  11   7   0    1.90    3.00
   7 -11   0   -4.90    4.00
 -11  -7   0   -0.60    3.30
  -7  11   0    2.50    3.30
   7 -11   0    1.90    3.00
  11   6   0   -3.10    2.90
  -6  11   0    1.70    2.90
  11   6   0   -1.70    2.60
   6 -11   0   -5.10    3.70
   6 -11   0    1.40    2.70
 -11  -6   0   -0.70    3.10
  -5  11   0   36.20    5.60
  11   5   0   30.90    5.90
  11   5   0   38.80    4.80
 -11  -5   0   39.00    6.40
   5 -11   0   31.40    5.00
   5 -11   0   35.70    5.70
  11   3   0   -1.40    3.30
   3 -11   0    5.40    4.20
   3 -11   0   -2.60    3.00
 -11  -3   0    0.70    3.10
  -3  11   0   -6.60    3.30
  11   3   0    4.30    2.60
  11   2   0    4.70    3.40
  11   2   0   10.40    2.90
 -11  -2   0    1.10    2.80
   2 -11   0    1.80    4.10
  -1  11   0   10.80    3.90
  11   1   0    8.50    4.10
   1 -11   0   10.30    3.80
 -11  -1   0    7.10    3.40
  11   1   0    9.10    2.90
   1 -11   0   -1.90    4.50
 -11   0   0    1.00    2.60
  11   0   0   -4.80    2.90
   0 -11   0   -0.10    3.00
  11   0   0   -3.70    2.10
   0 -11   0   -8.90    3.70
  -1 -11   0   -0.80    3.30
  11  -1   0    0.70    2.40
 -11   1   0    0.70    2.50
  11  -1   0    3.30    3.20
  -1 -11   0   -5.20    3.40
  -1 -11   0  -11.90    4.30
  11  -2   0    3.40    3.20
  11  -2   0    6.00    2.70
 -11   2   0    0.20    2.60
  -3 -11   0    4.70    5.60
  11  -3   0    7.20    3.40
  -3 -11   0   15.10    5.00
  11  -3   0   15.20    4.50
 -11   3   0    6.40    3.40
   3  11   0   16.30    3.30
  -4 -11   0    0.90    5.00
  -4 -11   0    9.80    5.80
 -11   4   0   -5.90    2.40
  11  -4   0   -6.30    2.60
  11  -5   0   60.59    7.70
  11  -5   0   40.40    5.70
 -11   5   0   43.20    6.30
  11  -6   0   -4.60    2.80
  -6 -11   0   13.20    4.60
  11  -6   0    4.40    3.40
 -11   6   0   -2.90    2.50
  11  -8   0    2.40    3.60
   8  11   0   -1.70    3.20
  -8 -11   0   -4.50    4.30
 -11   8   0    3.90    2.80
   8  11   0   -1.80    3.30
  11  -8   0    3.30    3.70
   9  11   0    7.30    4.30
  -9 -11   0    0.20    3.60
  11  -9   0   -1.20    3.70
  11 -10   0   -1.90    3.60
  10  11   0   -1.30    3.00
  11  11   0    1.20    2.90
  11 -11   0   -1.40    4.10
  12  11   0   -4.60    2.80
  11 -12   0    0.40    4.40
  12  10   0   27.10    4.60
  10 -12   0   18.40    6.00
   9 -12   0   -3.30    3.90
  12   9   0   -0.90    2.80
  12   8   0    7.70    3.30
   8 -12   0    0.00    4.30
  12   7   0    1.60    2.80
   7 -12   0   -7.70    4.00
  -7  12   0   -2.30    2.70
 -12  -7   0    3.00    3.50
  12   7   0   -0.30    3.60
   7 -12   0   -0.60    4.50
  -6  12   0  295.97   19.50
 -12  -6   0  343.67   21.00
   6 -12   0  314.17   19.50
   6 -12   0  296.37   19.60
  12   6   0  296.77   18.20
  12   6   0  315.07   20.80
  -5  12   0    1.10    2.90
  12   5   0   -4.10    3.30
   5 -12   0   -2.10    2.60
   5 -12   0   -2.80    3.80
 -12  -5   0    0.70    3.40
  12   5   0   -2.20    2.50
  -4  12   0   66.59    8.60
  12   4   0   72.39    8.80
  12   4   0   65.29    6.70
   4 -12   0   71.79    7.70
 -12  -4   0   66.09    8.30
   4 -12   0   72.99    8.60
  12   3   0   -3.30    3.10
  -3  12   0   -3.20    3.60
 -12  -3   0    0.60    3.10
  12   3   0   -0.80    2.50
   3 -12   0    2.80    3.80
   3 -12   0   -2.50    3.00
  -2  12   0 1280.27   67.09
   2 -12   0 1205.58   66.19
 -12  -2   0 1300.67   67.29
  12   2   0 1278.67   65.19
   2 -12   0 1253.97   65.79
  12   2   0 1264.27   67.59
  12   1   0   -2.20    2.60
  12   1   0   -3.00    3.10
 -12  -1   0   -0.80    3.30
   1 -12   0   -3.50    3.40
   1 -12   0  -10.00    4.30
  -1  12   0    2.40    3.30
 -12   0   0  196.28   13.60
  12   0   0  187.48   12.20
  12   0   0  171.08   14.10
   0 -12   0  198.68   13.90
   0 -12   0  169.78   13.50
 -12   1   0   -3.70    2.60
  -1 -12   0  -12.30    5.50
  12  -1   0   -4.80    2.80
  -1 -12   0    0.20    4.60
  12  -1   0   -7.10    3.00
  -1 -12   0   -0.50    3.90
  12  -2   0 2333.27  121.29
  12  -2   0 2272.27  119.19
  -2 -12   0 2291.27  119.99
 -12   2   0 2405.06  120.49
  -2 -12   0 2428.96  121.49
  -2 -12   0 2368.16  120.69
  -3 -12   0    7.70    5.40
  12  -3   0    1.90    3.10
   3  12   0   10.60    3.10
  -3 -12   0    6.00    4.10
  12  -3   0   -4.40    3.10
 -12   3   0   -2.70    2.70
  -4 -12   0  308.27   21.70
 -12   4   0  289.67   18.20
  -4 -12   0  298.67   19.90
  12  -4   0  282.97   17.60
  12  -4   0  280.17   19.30
   4  12   0  291.97   17.10
  12  -5   0   -7.10    3.20
  -5 -12   0   10.70    5.70
  12  -5   0   -5.80    2.90
   5  12   0    7.40    3.20
  -5 -12   0    3.20    4.80
 -12   5   0   -4.20    2.60
  -6 -12   0  520.75   32.40
  12  -6   0  534.65   30.20
   6  12   0  538.35   29.10
  -6 -12   0  549.65   32.00
  12  -6   0  540.05   31.70
 -12   6   0  548.65   30.60
  -7 -12   0   -5.80    4.10
  12  -7   0    5.70    3.90
   7  12   0    4.40    3.20
  12  -8   0  950.60   49.99
  -8 -12   0  944.91   52.29
   8  12   0  892.41   48.50
  12  -9   0    2.80    4.00
   9  12   0   -0.10    3.00
  12 -10   0   60.99    8.30
  10  12   0   70.59    7.50
  11  12   0   -6.50    2.90
  12 -12   0   12.10    5.90
  12  12   0    9.50    4.00
  12 -13   0    3.30    5.50
  13  12   0    0.50    3.40
  11 -13   0   -0.20    5.00
  13  11   0   -0.30    3.20
  13  10   0   -1.90    3.00
  10 -13   0    1.70    4.50
   9 -13   0    6.20    5.20
  13   9   0   14.10    3.80
  13   8   0   -4.70    3.00
   8 -13   0   -9.00    4.20
  13   7   0   48.80    6.70
  13   6   0    2.60    2.90
   6 -13   0   -2.80    4.40
  -5  13   0   12.00    4.50
  13   5   0   15.10    3.70
  13   5   0    8.10    6.10
   5 -13   0    4.10    4.70
 -13  -5   0    6.20    4.20
   5 -13   0   12.80    4.20
  -4  13   0   -5.60    3.10
   4 -13   0   -2.80    3.70
   4 -13   0   -2.60    2.70
 -13  -4   0   -4.30    2.60
  13   4   0   -4.60    3.30
  13   4   0   -1.40    2.60
  -3  13   0   14.90    5.40
 -13  -3   0   22.50    5.20
  13   3   0   17.80    4.00
  13   3   0   18.90    5.00
   3 -13   0   16.00    4.40
   3 -13   0   21.40    5.30
   2 -13   0   11.90    4.30
  13   2   0    3.90    3.70
  13   2   0   12.20    3.30
 -13  -2   0    2.80    3.40
  -2  13   0    1.60    3.70
   1 -13   0   16.20    5.10
  13   1   0    2.30    3.50
   1 -13   0    5.30    3.90
  13   1   0   -4.40    2.90
 -13  -1   0   -0.70    3.10
   0 -13   0    4.20    3.40
   0 -13   0    4.80    4.30
  13   0   0   -1.10    3.10
 -13   0   0   -1.60    3.10
   0 -13   0   -1.90    5.30
  13   0   0    5.90    3.70
  13  -1   0    2.00    3.30
  -1 -13   0    6.80    4.00
  -1 -13   0    9.40    4.70
  13  -1   0   -0.40    3.80
  -1 -13   0    0.70    5.40
 -13   1   0   -3.10    3.40
  -2 -13   0   21.80    4.80
  -2 -13   0    9.80    5.00
  13  -2   0   13.30    3.80
  -3 -13   0   25.90    6.40
  -3 -13   0   20.40    6.50
  13  -4   0   10.90    3.80
   4  13   0   -2.30    3.20
  -4 -13   0    9.40    5.00
  13  -4   0   -1.70    3.40
 -13   4   0   -2.40    3.10
  -4 -13   0    2.80    6.60
  -5 -13   0   63.59    9.60
  13  -5   0   54.79    7.60
  -5 -13   0   61.79   10.10
   5  13   0   46.50    6.60
  13  -6   0   -1.20    3.50
  -6 -13   0    3.50    4.60
   6  13   0    3.20    3.30
  -7 -13   0   10.00    5.30
   7  13   0    9.60    3.50
   8  13   0   -3.90    3.20
  13  -8   0    2.60    4.20
  13  -9   0   22.20    5.90
   9  13   0   16.10    4.30
  13 -10   0    5.40    4.90
  10  13   0   -1.70    3.10
  13 -11   0   18.80    5.80
  11  13   0   13.30    4.20
  12  13   0    3.30    3.50
  13 -12   0   -2.10    5.00
  13  13   0   -3.20    3.50
  13 -13   0    0.80    5.80
  13 -14   0    0.20    5.90
  14  13   0   -3.50    3.70
  12 -14   0   38.10    8.00
  14  12   0   25.00    5.40
  11 -14   0   -6.00    5.10
  14  11   0   -3.10    3.40
  14  10   0  492.05   28.20
  10 -14   0  508.45   30.80
  14   9   0    1.10    3.20
   9 -14   0   -3.20    4.70
  14   8   0  101.89    9.10
   8 -14   0  102.09   11.30
   7 -14   0   -2.70    4.40
  14   7   0   -0.30    3.00
   6 -14   0   79.19   10.20
  14   6   0   90.29    8.40
   5 -14   0   -0.60    4.30
  14   5   0    1.10    3.00
  14   4   0  252.87   16.20
   4 -14   0  273.07   17.40
  -3  14   0   -5.50    4.20
   3 -14   0   -0.70    3.90
  14   3   0   -1.10    2.90
   2 -14   0    6.00    3.80
  -2  14   0    5.60    3.90
   2 -14   0    2.40    4.50
  14   2   0    1.60    2.90
  14   1   0   -1.40    2.90
   1 -14   0   -2.50    3.50
   1 -14   0   -3.70    4.50
   0 -14   0   76.09    8.70
  14   0   0   60.19    7.30
   0 -14   0   69.99    9.90
   0 -14   0   57.79    8.00
  -1 -14   0    0.40    4.00
  14  -1   0   -6.20    2.70
  -1 -14   0    6.40    4.00
  -1 -14   0   -6.10    5.30
  14  -2   0  492.95   27.80
  -2 -14   0  511.15   30.80
  -2 -14   0  474.15   29.20
   3  14   0    1.40    3.00
  14  -3   0   -1.40    3.20
  -3 -14   0   -1.50    5.30
  -3 -14   0   -1.60    4.50
  -4 -14   0  190.18   15.40
   4  14   0  184.38   12.20
   5  14   0    1.50    3.40
  14  -5   0   -3.10    3.60
  -5 -14   0   -2.10    5.00
  -6 -14   0  187.48   16.40
  14  -6   0  182.18   14.00
   6  14   0  184.18   12.20
  14  -7   0   -4.30    4.00
   7  14   0    0.80    3.60
   8  14   0  269.87   17.90
  14  -8   0  346.87   20.60
  14  -9   0   -5.60    4.10
   9  14   0   -0.70    3.30
  10  14   0   54.99    7.50
  11  14   0    3.30    3.30
  14 -11   0   -1.60    5.00
  14 -12   0  269.77   20.80
  12  14   0  290.47   17.90
  14 -13   0    0.60    5.90
  13  14   0    3.90    3.90
  14 -14   0  215.28   19.70
  14  14   0  233.28   15.80
  15  14   0   -3.60    3.80
  15  13   0   -2.40    4.10
  13 -15   0   -3.70    8.70
  15  12   0   -3.40    3.80
  12 -15   0    1.30    8.60
  11 -15   0    6.50    7.00
  15  11   0    9.00    4.10
  10 -15   0   -8.00    5.30
  15  10   0   -1.60    3.60
  15   9   0    4.80    3.80
   9 -15   0    8.80    6.10
  15   8   0   -0.50    3.10
   8 -15   0   -8.20    4.70
  15   7   0   31.90    5.40
   7 -15   0   18.70    6.60
   6 -15   0  -12.20    4.70
  15   6   0    0.70    3.40
   5 -15   0    5.30    5.90
  15   5   0   -1.30    3.10
  15   4   0    0.10    3.20
  15   3   0    0.70    3.10
  15   2   0   -2.60    2.90
  15   1   0   -0.50    3.00
   0 -15   0   -3.30    4.10
  15   0   0    0.60    3.00
  -1 -15   0    7.60    4.30
  15  -1   0   11.40    3.90
  15  -2   0   -1.40    3.30
  -2 -15   0    6.50    5.20
  15  -3   0   -4.90    3.70
  -3 -15   0   -5.00    5.60
  -4 -15   0    1.70    7.40
  15  -4   0    1.30    3.80
  15  -5   0    3.90    4.20
  15  -6   0    7.70    4.70
  15  -7   0    1.60    4.70
  15  -8   0   -4.40    4.40
  15  -9   0   15.90    6.20
  15 -10   0   -7.20    4.90
  15 -11   0    1.80    5.60
  15 -12   0   -0.20    5.80
  15 -13   0    1.60    6.30
  15 -14   0   -0.90    6.50
  16  14   0   14.70    5.20
  16  13   0   -2.20    4.00
  16  12   0   10.30    4.70
  16  11   0   -0.80    3.80
  16  10   0  153.78   12.30
  16   9   0   -5.40    3.40
  16   8   0   53.09    6.80
  16   7   0   -1.40    3.50
  16   6   0   90.29    9.20
  16   5   0   -2.40    3.30
  16   4   0  397.96   23.50
  16   3   0    8.10    4.00
  16   2   0   61.39    8.20
  16   1   0    0.30    3.50
   1 -16   0    0.80    4.60
  16   0   0  293.77   19.00
   0 -16   0  317.77   22.40
  -1 -16   0    0.40    3.90
  16  -1   0   -2.80    3.60
  16  -2   0  159.58   12.80
  -2 -16   0  165.48   17.00
  16  -3   0   -3.50    3.90
  16  -4   0   17.20    5.40
  16  -5   0   -3.20    4.10
  16  -6   0   15.30    5.50
  16  -7   0    3.80    4.90
  16  -8   0   -1.50    5.10
  16  -9   0   -6.60    5.10
  16 -10   0   51.59    9.40
  16 -11   0   -2.40    5.80
  16 -12   0  144.69   15.80
  16 -13   0    2.30    6.40
  16 -14   0   54.09   11.00
  17  14   0    0.20    7.10
  17  13   0   -3.00    4.20
  17  12   0   -3.80    4.10
  17  11   0    0.10    4.20
  17  10   0   -0.50    4.10
  17   9   0   -0.90    3.90
  17   8   0   -0.20    3.80
  17   7   0    9.20    4.60
  17   6   0    0.30    3.60
  17   5   0    4.90    4.10
  17   4   0    1.60    4.00
  17   3   0    1.50    3.80
  17   2   0    1.90    4.00
  17   1   0    7.30    4.50
  17   0   0    1.60    4.30
  17  -1   0   -9.40    3.90
  17  -2   0   -4.30    4.50
  17  -3   0    8.50    5.00
  17  -4   0   -4.20    4.40
  17  -5   0    0.60    4.90
  17  -6   0    0.10    5.00
  17  -7   0    3.50    5.40
  17  -8   0    6.30    6.00
  17  -9   0   -0.50    6.00
  17 -10   0    8.00    6.40
  17 -11   0   17.90    7.30
  17 -12   0   -5.30    6.00
  17 -13   0    5.90    7.50
  17 -14   0   -3.90    7.20
  18  13   0   -7.40    4.30
  18  12   0   31.90    6.60
  18  11   0   -0.30    4.20
  18  10   0   94.89   10.60
  18   9   0   -1.10    4.20
  18   8   0   -0.80    4.10
  18   7   0    7.40    4.60
  18   6   0    3.90    4.50
  18   5   0   -5.70    4.30
  18   4   0    1.70    4.50
  18   3   0   -1.90    4.30
  18   2   0   55.49    8.00
  18   1   0    0.80    4.40
  18   0   0  189.08   15.20
  18  -1   0   -0.90    4.80
  18  -2   0  204.18   16.30
  18  -3   0    3.30    5.20
  18  -4   0   -0.50    4.90
  18  -5   0    6.40    5.70
  18  -6   0  148.79   14.70
  18  -7   0    5.30    6.40
  18  -8   0  102.69   13.80
  18  -9   0   -8.10    6.30
  18 -10   0   -0.40    6.40
  18 -11   0    7.40    7.00
  18 -12   0   40.50   10.20
  18 -13   0   -4.50    7.20
  18 -14   0    1.90    8.40
  19  13   0    8.40    5.80
  19  12   0   -3.90    4.70
  19  11   0    3.90    5.20
  19  10   0    1.60    5.00
  19   9   0   21.90    6.20
  19   8   0   20.40    5.60
  19   7   0   -1.80    4.60
  19   6   0   -0.30    5.00
  19   5   0   -5.30    4.50
  19   4   0    1.50    5.10
  19   3   0   -5.00    4.50
  19   2   0   -6.90    4.60
  19   1   0   10.70    5.70
  19   0   0    4.80    5.40
  19  -1   0   -8.90    5.10
  19  -2   0   -4.90    4.90
  19  -3   0    8.10    5.80
  19  -4   0    5.20    5.40
  19  -5   0    2.80    5.80
  19  -6   0   -0.10    5.80
  19  -7   0    4.30    6.60
  19  -8   0   -6.00    6.80
  19  -9   0   -5.90    6.40
  19 -10   0    0.60    7.40
  19 -11   0    7.20    7.80
  19 -12   0    2.30    7.50
  19 -13   0   -0.30    7.40
  20  11   0    3.50    5.50
  20  10   0  229.68   18.00
  20   9   0   -1.70    5.20
  20   8   0    6.10    5.90
  20   7   0    1.00    5.30
  20   6   0  201.18   16.40
  20   5   0    2.20    5.40
  20   4   0  122.59   13.40
  20   3   0   -3.50    5.20
  20   2   0   14.70    6.30
  20   1   0   -6.20    5.40
  20   0   0   27.50    7.50
  20  -1   0   -0.70    5.30
  20  -2   0   -3.60    5.60
  20  -3   0   -4.60    5.50
  20  -4   0    4.70    6.20
  20  -5   0    3.00    6.30
  20  -6   0   47.00   10.10
  20  -7   0   -2.30    6.80
  20  -8   0    7.50    7.70
  20  -9   0   -2.60    7.30
  20 -10   0   83.59   13.20
  20 -11   0   16.60    8.40
  21   9   0   13.50    6.70
  21   8   0   -3.60    6.00
  21   7   0   13.80    6.90
  21   6   0    5.50    6.20
  21   5   0    0.10    5.80
  21   4   0    6.20    6.50
  21   3   0    1.10    5.90
  21   2   0   -4.50    5.80
  21   1   0   -1.00    5.90
  21   0   0    2.20    6.20
  21  -1   0    0.50    6.30
  21  -2   0   -2.60    6.20
  21  -3   0    6.40    7.00
  21  -4   0   -1.10    6.60
  21  -5   0    2.70    7.00
  21  -6   0    1.70    7.20
  21  -7   0   25.40    8.90
  21  -8   0    3.20    7.80
  21  -9   0   -1.60    7.40
  22   6   0  121.19   14.60
  22   5   0   10.90    7.20
  22   4   0   37.10    9.00
  22   3   0    1.10    6.40
  22   2   0  102.39   13.10
  22   1   0    2.50    6.20
  22   0   0  186.48   18.10
  22  -1   0    9.90    7.50
  22  -2   0   48.80   10.30
  22  -3   0   -4.90    7.40
  22  -4   0   26.00    9.30
  22  -5   0    2.80    7.80
  22  -6   0   68.79   12.40
  23   1   0    0.00    7.20
  23   0   0    7.50    7.60
  23  -1   0   12.10    8.30
   0  -1  -1  746.13   36.80
   1   0  -1  714.03   37.00
   0  -1  -1  831.52   37.70
   0   1  -1  701.93   37.10
   0   1   1  733.43   36.80
  -1   0   1  699.93   37.00
   0  -1   1  697.53   37.00
  -1   1  -1 6432.36  316.47
  -1  -1  -1 6426.66  317.27
   1   1  -1 6276.77  317.07
   1  -1  -1 6355.26  318.07
   1  -1  -1 6476.65  317.37
   1   1  -1 6135.79  316.17
   1  -1   1 6060.79  316.37
  -1  -1   1 6152.88  317.57
  -1   1   1 6531.05  317.27
   1  -2  -1   48.30    4.20
   1  -2  -1   50.69    3.40
  -2  -1  -1   59.89    4.90
   2   1  -1   56.59    3.60
  -1   2   1   47.50    3.30
   2   1   1   47.50    3.30
   0  -2  -1   43.70    3.20
   2   0  -1   59.49    3.70
   2   0  -1   49.60    3.50
   0  -2  -1   53.69    4.50
   0   2   1   43.90    3.20
  -2   0   1   47.60    3.50
   0  -2   1   55.19    3.30
   2  -1  -1  281.57   15.30
  -1  -2  -1  309.37   16.10
   2  -1  -1  290.27   15.30
   1   2  -1  272.07   14.80
  -1  -2  -1  282.47   15.00
  -1  -2  -1  300.57   15.10
   2  -1   1  280.87   15.00
  -1  -2   1  285.47   14.70
   1   2   1  273.67   15.10
  -2   1   1  310.37   15.30
   2   2  -1  273.67   14.80
  -2  -2  -1  261.97   14.50
   2  -2  -1  302.17   14.70
  -2  -2  -1  270.87   14.60
  -2   2  -1  263.87   14.10
  -2  -2  -1  259.77   15.60
  -2   2   1  299.87   14.60
  -2  -2   1  261.47   14.80
   2   2   1  272.27   14.50
   2  -2   1  267.67   14.20
   2  -3  -1 1921.81   95.89
  -2   3  -1 1839.22   95.69
  -3  -2  -1 1943.31   96.99
   2  -3  -1 1875.21   96.29
   3   2  -1 1872.41   96.29
   3   2  -1 2076.49   95.59
  -3  -2  -1 1914.91   95.99
   2  -3   1 1857.81   95.59
   2  -3   1 1929.51   95.19
   3   2   1 1852.91   95.99
  -2   3   1 1917.41   95.89
  -3  -2   1 1892.21   96.39
  -1   3  -1  690.93   36.10
   3   1  -1  725.63   36.60
   1  -3  -1  731.33   36.20
  -3  -1  -1  696.83   36.10
   1  -3  -1  736.63   36.80
   3   1   1  700.53   36.20
  -1   3   1  709.13   36.20
   3   1   1  708.63   36.30
   1  -3   1  683.73   36.00
  -3  -1   1  695.83   36.50
   3   0  -1 1914.31   99.19
   0  -3  -1 1967.00   98.89
   0  -3  -1 1921.21   99.59
   3   0  -1 1992.60   98.89
  -3   0  -1 1982.90   98.69
   0   3   1 1991.30   98.99
   3   0   1 2103.99   98.99
  -3   0   1 1941.21   99.19
   3   0   1 1919.81   98.79
   3  -1   1   19.00    2.30
   1   3   1   28.50    3.20
  -3   2  -1    2.80    1.00
   2   3  -1    0.20    1.20
  -2  -3  -1    1.50    1.40
  -2  -3  -1    3.60    1.50
  -2  -3  -1    3.00    2.60
  -2  -3   1    1.20    0.80
   3  -2   1    0.30    1.00
   2   3   1    3.00    1.30
   3   3  -1   50.09    3.70
   3  -3  -1   53.89    4.30
   3  -3  -1   67.29    5.00
  -3   3   1   50.59    4.20
   3  -4  -1   33.50    3.40
   4   3  -1   27.10    3.80
  -4  -3  -1   28.10    3.40
   3  -4   1   31.10    2.30
   4   3   1   26.90    3.30
  -4  -3   1   28.30    4.00
   4   3   1   27.20    3.30
   3  -4   1   27.10    3.00
   4   2  -1  339.37   19.20
   4   2  -1  368.86   18.30
   2  -4  -1  323.57   19.10
   2  -4  -1  342.47   18.60
  -4  -2  -1  329.27   18.70
  -2   4  -1  361.96   17.90
  -2   4  -1  372.56   18.60
   4   2   1  340.27   18.70
  -4  -2   1  335.77   19.10
  -2   4   1  341.27   18.60
   2  -4   1  372.46   18.50
   2  -4   1  357.96   17.70
   4   2   1  327.27   18.70
  -4  -1  -1    4.80    1.40
   1  -4  -1    3.90    1.30
   4   1  -1    2.00    1.80
   1  -4  -1    5.70    2.40
  -1   4  -1    2.30    1.50
   1  -4   1   -0.40    1.60
   4   1   1    9.10    1.80
  -4  -1   1    2.70    1.50
  -1   4   1    7.70    1.70
   4   1   1    6.80    1.60
   0  -4  -1  161.08    9.40
   0  -4  -1  159.68   10.40
  -4   0  -1  163.08    9.20
   0  -4   1  173.08    9.60
   4   0   1  169.68    9.40
   4   0   1  158.88    9.30
   0   4   1  150.98    9.50
   4  -1  -1  411.96   21.80
  -1  -4  -1  404.26   21.50
  -4   1  -1  407.66   21.10
  -1  -4  -1  401.16   22.30
   4  -1  -1  424.66   21.50
  -4   1   1  402.66   21.70
  -1  -4   1  400.86   21.70
   4  -1   1  411.06   21.20
   4  -1   1  404.76   21.30
   1   4   1  385.26   21.60
   4  -2  -1  446.96   24.00
   2   4  -1  481.75   22.80
  -2  -4  -1  421.36   23.90
  -2  -4  -1  439.86   23.90
   2   4  -1  428.76   23.90
  -2  -4  -1  438.56   24.70
  -4   2  -1  443.46   23.30
   4  -2  -1  492.35   24.00
   4  -2   1  440.26   23.20
  -4   2   1  460.25   23.90
  -2  -4   1  433.16   24.10
  -2  -4   1  477.35   23.10
   4  -2   1  439.36   23.50
  -4   3  -1  566.54   27.40
  -3  -4  -1  485.25   28.80
   3   4  -1  501.85   28.00
  -3  -4  -1  545.35   28.00
   4  -3  -1  541.55   27.90
   4  -3   1  497.85   26.90
   4  -3   1  508.55   27.30
  -3  -4   1  504.55   28.10
   3   4   1  552.04   28.00
  -4   3   1  559.54   27.80
  -4  -4  -1   10.50    2.60
  -4   4  -1    8.10    1.70
   4  -4   1    7.20    1.60
   4   4   1    7.40    2.00
   4  -4   1    8.40    1.40
   4   4   1    6.50    2.10
   4  -5  -1  101.79    7.50
  -5  -4  -1  102.29    7.50
   5   4  -1  109.49    7.80
  -4   5  -1   96.99    6.80
   5   4  -1  104.99    6.30
   4  -5  -1   98.29    7.00
  -4   5   1  106.39    7.10
  -5  -4   1  104.99    7.80
   5   4   1  116.19    7.40
   4  -5   1  104.29    6.10
   5   4   1   98.59    7.30
   4  -5   1   99.09    6.70
  -5  -3  -1 1624.54   81.59
   5   3  -1 1626.54   80.59
   3  -5  -1 1589.34   81.49
   3  -5  -1 1602.34   81.29
  -3   5  -1 1610.14   81.09
   5   3  -1 1545.95   81.89
   5   3   1 1629.64   81.19
  -5  -3   1 1604.34   81.99
   5   3   1 1585.24   81.59
  -3   5   1 1597.94   81.29
   3  -5   1 1584.24   80.99
   3  -5   1 1613.54   80.19
  -2   5  -1   92.89    6.60
  -5  -2  -1   96.19    6.70
   2  -5  -1  122.29    6.90
   5   2  -1   95.99    7.30
   5   2   1  101.99    6.90
  -2   5   1  106.89    6.80
  -5  -2   1   99.19    7.20
   5   2   1   96.69    6.90
   2  -5   1  101.09    5.60
   2  -5   1   94.29    6.70
  -5  -1  -1 1140.19   57.09
   5   1  -1 1129.09   57.59
   1  -5  -1 1094.09   56.99
   5   1  -1 1191.08   56.79
  -1   5  -1 1070.29   56.99
   1  -5  -1 1158.68   57.69
   1  -5   1 1123.69   56.99
   5   1   1 1097.89   57.19
  -1   5   1 1103.89   57.09
  -5  -1   1 1063.29   57.39
   5   1   1 1109.89   56.89
   5   0  -1  754.22   37.00
  -5   0  -1  716.53   37.00
   5   0  -1  726.13   37.70
   5   0   1  723.53   36.90
   0  -5   1  722.83   37.30
  -5   0   1  700.33   37.50
   5   0   1  676.03   37.10
  -5   1  -1 1147.89   56.99
   5  -1  -1 1136.59   57.69
  -1  -5  -1 1115.89   57.99
  -1  -5  -1 1114.79   57.39
   5  -1  -1 1119.99   57.09
   5  -1   1 1137.29   57.19
  -1  -5   1 1094.29   57.49
  -5   1   1 1163.08   57.69
   1   5   1 1083.99   57.39
   5  -1   1 1099.69   56.79
  -2  -5  -1   -0.20    2.70
  -2  -5  -1    4.00    2.00
   5  -2  -1    2.90    2.10
  -5   2  -1    3.60    1.40
  -2  -5  -1    5.50    2.10
   5  -2   1    3.30    1.50
   5  -2   1    2.30    1.30
   5  -3  -1   67.89    5.50
   3   5  -1   52.09    3.40
   5  -3  -1   48.30    4.80
   3   5  -1   48.70    4.90
   5  -3   1   56.79    3.80
  -3  -5   1   56.89    5.20
  -5   3   1   46.00    4.50
  -5   4  -1  481.25   25.40
   5  -4  -1  485.35   26.00
   5  -4  -1  516.15   26.00
   4   5  -1  453.45   26.10
   4   5  -1  484.65   24.70
  -4  -5  -1  470.75   26.10
   5  -4   1  461.55   25.40
  -5   4   1  486.85   25.80
  -4  -5   1  500.65   26.60
   4   5   1  465.25   26.00
   5  -4   1  483.45   24.70
   5   5  -1   -0.80    1.20
   5  -5  -1    0.50    1.70
  -5  -5  -1   -0.40    1.80
   5   5  -1    8.80    2.80
   5  -5  -1   -1.30    2.20
  -5   5  -1    1.90    1.30
   5   5   1   -0.20    1.90
  -5  -5   1    1.40    1.90
   5  -5   1    2.90    1.60
  -5   5   1    2.10    1.70
   5   5   1    0.20    1.60
   5  -5   1    0.50    1.20
   6   5  -1  105.09    8.40
  -6  -5  -1  106.39    8.30
   5  -6  -1  122.29    8.60
   6   5  -1  118.59    6.90
  -5   6  -1  110.99    7.60
   5  -6  -1  106.89    7.90
  -6  -5   1  107.99    8.60
   5  -6   1  103.59    7.50
   6   5   1  109.89    8.20
   5  -6   1  114.09    6.80
  -5   6   1  104.49    7.80
   6   5   1  101.29    7.60
   4  -6  -1  368.76   20.40
   4  -6  -1  345.77   20.00
   6   4  -1  423.36   19.40
  -6  -4  -1  342.67   20.40
   6   4  -1  363.46   20.90
  -4   6  -1  345.47   19.80
   6   4   1  361.96   20.50
  -6  -4   1  373.76   21.00
   6   4   1  363.46   19.90
   4  -6   1  352.36   19.70
   4  -6   1  357.16   18.90
  -4   6   1  343.87   20.00
  -6  -3  -1   -0.10    1.50
   3  -6  -1   -1.60    2.30
   3  -6  -1   -0.50    1.50
  -3   6  -1    1.40    1.50
   6   3  -1    0.60    1.50
   6   3  -1    1.90    2.00
   3  -6   1    0.60    1.40
   3  -6   1    1.20    1.10
   6   3   1    1.00    1.70
  -6  -3   1   -0.40    1.70
  -3   6   1    1.10    1.60
   6   3   1    2.20    1.90
   2  -6  -1   28.90    3.40
   2  -6  -1   15.90    3.50
   6   2  -1   20.40    2.70
  -6  -2  -1   31.10    3.50
  -2   6  -1   25.40    3.50
   6   2   1   18.40    2.90
   6   2   1   14.90    2.70
   1  -6  -1   23.10    3.20
  -1   6  -1   19.30    2.90
   6   1  -1   22.60    3.60
   6   1  -1   28.90    3.30
  -6  -1  -1   18.40    2.80
   1  -6  -1   21.50    3.70
   6   1   1   18.30    2.80
   6   1   1   18.10    3.10
  -1   6   1   25.50    3.50
  -6  -1   1   19.50    3.10
   1  -6   1   17.40    3.00
   6  -1  -1  189.88   12.30
  -1  -6  -1  189.48   13.00
  -6   1  -1  196.98   11.70
  -1  -6  -1  188.98   12.10
   6  -1  -1  202.18   11.80
  -1  -6   1  239.28   12.60
   6  -1   1  213.28   12.10
   6  -1   1  232.08   11.60
  -1  -6   1  192.88   12.30
  -6   1   1  198.28   12.20
   1   6   1  187.18   12.30
   6  -2  -1    0.40    1.60
  -6   2  -1   -0.70    1.20
  -2  -6  -1    2.40    2.00
   6  -2  -1   -1.10    1.40
  -2  -6  -1   -1.70    2.50
  -2  -6  -1   -0.40    1.50
  -6   2   1   -0.20    1.40
  -2  -6   1    1.30    2.30
   6  -2   1    0.00    1.10
   6  -2   1   -0.10    1.30
  -6   3  -1  106.09    6.80
   6  -3  -1   99.69    7.50
   3   6  -1  108.29    6.00
   3   6  -1   99.89    7.50
  -3  -6  -1  104.39    8.10
  -3  -6  -1  103.69    7.70
   6  -3  -1  105.79    7.30
  -3  -6  -1  108.29    8.90
   6  -3   1  102.09    7.10
  -6   3   1  103.69    7.40
   6  -3   1  105.99    6.40
  -3  -6   1  100.49    7.90
  -4  -6  -1   89.29    9.10
   4   6  -1   79.89    6.60
   4   6  -1   84.69    5.00
  -6   4  -1   73.29    5.60
  -4  -6  -1   97.09    7.30
  -4  -6  -1   94.69    7.00
   6  -4  -1   69.09    6.40
   6  -4   1   75.79    5.90
  -6   4   1   68.39    6.10
  -4  -6   1   73.39    6.70
   6  -4   1   70.09    5.10
   4   6   1   92.09    6.60
   6  -5  -1  317.47   18.70
   5   6  -1  314.87   19.00
  -6   5  -1  315.47   18.10
  -5  -6  -1  334.07   19.30
   6  -5  -1  313.27   18.80
   5   6  -1  349.77   17.40
   5   6   1  334.77   18.40
  -6   5   1  333.47   18.70
  -5  -6   1  343.37   19.60
   6  -5   1  335.57   17.50
   5   6   1  334.67   19.10
   6  -5   1  315.77   18.30
   6  -6  -1   94.29    7.60
   6   6  -1  100.89    8.10
  -6   6  -1   94.19    7.10
   6   6  -1   99.49    6.30
  -6  -6   1   90.29    8.30
  -6   6   1   94.09    7.40
   6  -6   1  100.19    6.50
   6  -6   1   91.19    7.10
   6   6   1   97.39    7.50
   6   6   1  107.89    7.90
   6  -7  -1  177.98   11.40
   6  -7  -1  193.28   12.10
   7   6  -1  181.18   12.20
  -6   7  -1  167.18   11.10
   7   6  -1  162.08   10.10
  -7  -6  -1  178.58   12.10
   6  -7   1  171.88   10.30
  -6   7   1  178.98   11.40
   7   6   1  162.68   11.70
   7   6   1  165.88   11.20
   6  -7   1  164.88   11.00
  -7  -6   1  174.48   12.40
   5  -7  -1    1.40    3.20
  -7  -5  -1    2.90    2.20
  -5   7  -1    4.00    2.30
   7   5  -1    4.40    1.90
   7   5  -1    5.00    2.80
   5  -7  -1    2.00    2.20
  -7  -5   1    1.70    2.40
   7   5   1    4.10    2.40
   7   5   1    3.00    2.40
   5  -7   1    3.70    2.20
  -5   7   1    1.70    2.20
   5  -7   1    4.30    2.00
  -4   7  -1  303.07   18.10
  -7  -4  -1  308.27   18.50
   4  -7  -1  367.36   19.00
   7   4  -1  335.87   17.30
   4  -7  -1  316.37   18.20
   7   4  -1  315.87   19.00
  -4   7   1  296.37   18.10
   4  -7   1  340.57   17.10
   7   4   1  309.77   17.90
  -7  -4   1  306.47   18.90
   4  -7   1  302.17   17.90
   7   4   1  322.27   18.70
  -7  -3  -1   10.40    2.60
   3  -7  -1    5.70    2.90
   3  -7  -1    9.00    2.40
   7   3  -1   12.20    3.00
   7   3  -1   17.90    2.40
  -3   7  -1   10.70    2.70
   7   3   1    8.60    2.40
  -7  -3   1   16.00    3.40
   3  -7   1    8.30    2.30
   7   3   1   10.40    2.60
  -3   7   1    9.80    2.60
   3  -7   1    7.40    2.00
   7   2  -1 1558.24   81.49
   2  -7  -1 1568.34   80.69
   7   2  -1 1647.74   80.09
  -2   7  -1 1559.44   80.79
  -7  -2  -1 1583.04   80.99
   2  -7  -1 1632.44   81.29
   2  -7   1 1624.64   80.69
  -2   7   1 1573.84   80.89
   7   2   1 1523.05   81.09
  -7  -2   1 1571.94   81.49
   7   2   1 1561.14   80.29
   1  -7  -1    1.30    1.60
  -1   7  -1    0.10    1.50
   7   1  -1    2.90    1.70
  -7  -1  -1   -2.20    1.40
   1  -7  -1   -1.80    2.50
   7   1  -1    6.50    2.50
   7   1   1   -1.50    1.50
  -7  -1   1    4.50    1.90
   7   1   1    0.40    1.70
   1  -7   1   -1.60    1.90
  -1   7   1    1.90    1.90
   0  -7  -1   12.10    3.70
   0  -7  -1   13.10    2.60
  -7   0  -1   11.20    2.40
   7   0  -1    7.40    2.70
   7   0  -1   11.40    2.40
   7   0   1   10.50    2.10
   0   7   1   12.60    2.70
   7   0   1   11.30    2.50
  -7   0   1    9.60    2.80
  -1  -7  -1  180.48   11.30
  -1  -7  -1  170.58   12.20
   7  -1  -1  179.38   10.80
  -7   1  -1  181.98   10.90
   7  -1  -1  181.68   11.70
   7  -1   1  179.18   10.40
   1   7   1  178.08   11.50
  -1  -7   1  171.58   11.60
  -1  -7   1  167.78   11.50
  -7   1   1  188.38   11.50
   7  -1   1  184.78   11.20
  -3  -7  -1  142.99   11.90
   7  -3  -1  147.39   10.20
  -7   3  -1  172.78   10.00
  -3  -7  -1  155.88   11.30
  -3  -7  -1  152.28   10.90
   7  -3  -1  148.29   10.60
   3   7  -1  182.78    9.00
   7  -3   1  187.68    9.60
  -3  -7   1  152.48   11.30
  -7   3   1  153.08   10.40
   7  -3   1  160.68   10.30
   4   7  -1  261.17   16.70
  -4  -7  -1  329.97   17.20
   7  -4  -1  290.67   16.50
  -4  -7  -1  292.67   17.20
  -7   4  -1  265.37   15.80
   4   7  -1  306.77   15.00
   7  -4  -1  268.97   16.70
  -7   4   1  277.67   16.40
  -4  -7   1  262.67   17.00
   7  -4   1  258.67   16.20
   7  -4   1  267.17   15.20
  -5  -7  -1 1161.08   61.69
   7  -5  -1 1206.98   61.49
   5   7  -1 1175.08   61.69
  -7   5  -1 1191.48   60.69
   7  -5  -1 1185.78   60.99
   5   7  -1 1227.38   59.69
  -5  -7   1 1179.18   62.09
  -7   5   1 1197.78   61.09
   5   7   1 1137.59   60.59
   7  -5   1 1180.28   59.79
   7  -5   1 1169.28   60.89
   5   7   1 1120.39   61.29
  -6  -7  -1    4.00    3.00
   6   7  -1    9.50    2.00
   7  -6  -1    6.40    3.00
   6   7  -1    6.50    2.60
   7  -6  -1    3.00    2.40
  -7   6  -1    7.60    2.20
   7  -6   1    1.80    2.00
   6   7   1    1.00    2.40
   6   7   1    2.60    2.70
   7  -6   1    0.70    2.20
  -6  -7   1    7.50    3.00
   7  -7  -1   96.09    8.10
  -7   7  -1   88.89    7.30
  -7  -7  -1  104.69    8.80
   7  -7  -1   83.59    8.80
   7   7  -1   87.79    8.30
   7   7  -1   93.59    6.50
   7   7   1   90.99    7.90
   7  -7   1   88.99    7.00
  -7   7   1   93.29    7.80
   7   7   1   88.29    7.80
   7  -7   1   93.19    7.50
  -7  -7   1   98.29    8.90
  -8  -7  -1   75.79    8.00
   8   7  -1   80.69    6.10
   7  -8  -1   73.29    7.70
   7  -8  -1   99.09    9.10
   8   7  -1   74.09    7.90
  -7   8  -1   77.49    7.20
  -7   8   1   81.69    7.40
   8   7   1   80.89    7.50
   8   7   1   69.69    7.50
   7  -8   1   70.89    6.90
  -8  -7   1   84.29    8.50
   7  -8   1   74.29    6.80
   8   6  -1   21.00    3.20
  -8  -6  -1   17.60    4.00
   6  -8  -1   26.20    4.40
  -6   8  -1   14.30    3.40
   8   6  -1   16.00    4.20
  -6   8   1   15.60    3.60
   6  -8   1   16.30    3.20
   8   6   1   17.40    4.00
   8   6   1   10.60    3.40
   6  -8   1   17.40    3.50
  -8  -6   1   18.30    4.60
  -8  -5  -1   45.50    5.90
   5  -8  -1   43.60    5.50
   5  -8  -1   49.99    6.80
   8   5  -1   50.79    4.90
   8   5  -1   42.20    6.00
  -5   8  -1   45.10    5.50
   8   5   1   61.09    5.70
   8   5   1   57.49    6.10
   5  -8   1   46.10    4.60
  -8  -5   1   59.29    6.60
  -5   8   1   48.70    5.60
   5  -8   1   38.40    5.10
   4  -8  -1  106.09    8.20
  -4   8  -1  105.89    8.30
   4  -8  -1  100.49    9.20
   8   4  -1  119.89    9.30
   8   4  -1  121.39    7.60
  -8  -4  -1  120.79    8.80
   4  -8   1  112.29    7.40
  -8  -4   1  101.39    8.90
  -4   8   1   99.59    8.30
   8   4   1  112.89    8.80
   4  -8   1  109.39    8.10
   8   4   1  113.79    8.20
   3  -8  -1   11.80    2.80
   3  -8  -1    7.10    3.70
  -8  -3  -1    8.70    2.90
   8   3  -1   11.10    2.70
   8   3  -1   11.90    3.00
  -3   8   1   12.80    3.10
  -8  -3   1   15.70    3.50
   8   3   1   11.10    2.80
   8   3   1    8.50    2.80
  -8  -2  -1    1.10    1.80
  -2   8  -1    1.90    2.20
   2  -8  -1    4.20    1.90
   2  -8  -1   -5.00    2.70
   8   2  -1    1.40    2.20
   8   2   1    1.90    2.40
   2  -8   1    4.20    2.20
   8   2   1    1.80    2.00
  -2   8   1    4.00    2.20
  -8  -2   1   -0.90    2.00
   8   1  -1   13.80    3.30
   1  -8  -1   14.90    2.90
   8   1  -1   16.10    2.90
  -8  -1  -1   13.80    2.90
   1  -8  -1   12.00    3.80
  -8  -1   1   12.50    3.20
   8   1   1   13.20    2.70
  -1   8   1   13.20    3.10
   8   1   1   15.00    3.20
   1  -8   1   13.80    3.30
   0  -8  -1  201.58   14.20
   8   0  -1  207.98   13.80
   8   0  -1  221.58   12.60
  -8   0  -1  213.78   12.90
   0  -8  -1  231.58   13.20
   0  -8   1  191.38   13.10
  -8   0   1  220.18   13.50
   8   0   1  205.38   13.20
   8   0   1  203.38   12.30
   0   8   1  218.78   13.60
  -1  -8  -1  110.59    8.30
  -8   1  -1  115.39    7.80
  -1  -8  -1   93.89    9.40
   8  -1  -1  102.99    7.70
   8  -1  -1  100.59    8.50
  -1  -8   1  109.69    8.90
   1   8   1  103.49    8.60
   8  -1   1  118.39    7.30
  -8   1   1  110.19    8.30
   8  -1   1  111.49    8.20
  -1  -8   1  118.09    8.90
  -2  -8  -1    6.10    2.80
  -2  -8  -1    3.50    2.40
  -8   2  -1    0.60    1.70
   8  -2  -1    1.60    2.10
  -2  -8  -1    6.90    3.80
   8  -2  -1    0.70    2.20
  -2  -8   1    5.20    3.20
  -8   2   1    1.80    2.10
   8  -2   1    4.20    1.70
   8  -2   1    2.20    2.20
  -2  -8   1    2.00    2.60
   3   8  -1   30.40    2.90
  -3  -8  -1   31.50    4.80
  -3  -8  -1   26.60    4.70
  -8   3  -1   19.00    3.20
   8  -3  -1   22.00    4.30
  -3  -8  -1   37.00    6.00
   8  -3  -1   20.90    3.80
  -3  -8   1   26.50    5.00
   8  -3   1   24.30    3.80
  -8   3   1   20.10    3.60
   8  -3   1   22.10    2.90
  -5  -8  -1   32.70    5.30
   5   8  -1   43.20    4.10
  -5  -8  -1   35.50    5.90
   8  -5  -1   44.10    6.00
  -8   5  -1   32.60    4.40
   5   8  -1   38.90    5.50
   8  -5  -1   43.30    5.70
   8  -5   1   37.20    5.10
  -5  -8   1   46.10    6.10
   5   8   1   34.00    4.70
   8  -5   1   33.70    4.20
  -8   5   1   32.20    4.50
   6   8  -1    6.70    3.20
   8  -6  -1    3.80    2.80
   8  -6  -1   10.30    3.90
  -8   6  -1    4.90    2.50
   6   8  -1   15.50    2.90
  -8   6   1    9.90    2.90
   8  -6   1    5.10    2.50
   8  -6   1    6.20    2.90
  -6  -8   1    8.50    4.00
   7   8  -1  255.57   17.20
   8  -7  -1  258.17   17.20
  -7  -8  -1  264.67   17.90
   8  -7  -1  272.77   17.10
  -8   7  -1  270.07   16.40
   7   8  -1  277.77   15.20
   7   8   1  291.97   16.60
   8  -7   1  267.97   16.60
  -8   7   1  279.17   16.80
   7   8   1  271.57   17.30
   8  -7   1  281.77   15.70
  -7  -8   1  274.07   18.10
   8   8  -1    1.60    3.10
  -8  -8  -1    4.10    3.60
   8   8  -1    3.00    2.50
   8  -8  -1   11.20    3.80
  -8   8  -1   -3.70    2.50
   8   8   1    3.30    3.10
  -8  -8   1    6.40    4.00
   8  -8   1   -3.20    2.70
   9   8  -1   21.40    5.10
  -8   9  -1   26.40    4.60
   8  -9  -1   22.80    4.80
   9   8  -1   41.50    5.20
   8  -9  -1   18.70    5.80
  -9  -8  -1   22.30    5.00
   9   8   1   24.00    5.00
  -9  -8   1   29.10    5.90
   8  -9   1   23.60    4.40
   8  -9   1   20.90    4.50
  -8   9   1   25.20    4.90
   9   8   1   25.60    5.10
   9   7  -1 1428.36   73.79
   9   7  -1 1353.96   70.99
  -9  -7  -1 1384.96   73.49
   7  -9  -1 1396.96   72.89
  -7   9  -1 1390.76   72.49
   7  -9  -1 1397.06   72.69
   9   7   1 1374.66   71.79
  -7   9   1 1384.06   72.59
  -9  -7   1 1422.86   73.99
   7  -9   1 1423.36   71.49
   7  -9   1 1399.76   72.29
   9   7   1 1364.36   73.29
   6  -9  -1    5.90    2.70
   9   6  -1    5.30    3.30
  -9  -6  -1    4.00    3.20
  -6   9  -1    9.10    3.00
   9   6  -1    4.80    2.60
  -9  -6   1    4.40    3.50
  -6   9   1   10.00    3.30
   6  -9   1    6.60    2.90
   6  -9   1   -2.70    2.90
   9   6   1    3.60    3.40
   9   6   1   -1.40    3.00
  -5   9  -1   42.30    5.60
   9   5  -1   53.29    5.30
   5  -9  -1   48.80    6.00
  -9  -5  -1   56.09    6.40
   5  -9  -1   59.19    8.20
   9   5  -1   47.40    6.90
   5  -9   1   50.49    5.60
   9   5   1   56.79    6.50
   5  -9   1   47.30    5.40
   9   5   1   51.89    6.10
  -5   9   1   49.99    6.10
  -9  -5   1   48.10    6.60
   9   4  -1  152.88   11.80
   9   4  -1  159.08   10.00
  -4   9  -1  144.29   10.90
  -9  -4  -1  172.38   11.50
   4  -9   1  162.48    9.80
   9   4   1  144.49   10.50
   4  -9   1  144.29   10.40
  -9  -4   1  150.18   11.60
   9   4   1  155.18   11.40
  -9  -3  -1 1744.33   88.59
   9   3  -1 1747.93   89.19
   9   3  -1 1696.93   87.09
   3  -9  -1 1738.73   88.09
  -3   9  -1 1715.53   88.29
   3  -9  -1 1758.92   88.59
  -3   9   1 1704.13   88.39
   3  -9   1 1721.83   87.89
  -9  -3   1 1705.43   88.99
   9   3   1 1695.43   87.49
   9   3   1 1701.83   88.69
   3  -9   1 1679.73   86.69
   9   2  -1  382.16   20.40
  -9  -2  -1  386.86   21.50
   2  -9  -1  359.66   21.90
  -2   9  -1  363.16   21.40
   9   2  -1  371.56   22.20
   2  -9  -1  360.16   21.10
   9   2   1  371.16   21.70
   2  -9   1  376.26   21.30
  -2   9   1  356.36   21.40
   9   2   1  378.16   20.60
  -9  -2   1  369.16   22.00
   1  -9  -1  652.63   36.00
   9   1  -1  679.63   37.00
   9   1  -1  674.93   35.40
  -9  -1  -1  692.93   36.30
   1  -9  -1  662.33   36.70
   9   1   1  668.23   36.50
  -1   9   1  669.53   36.50
  -9  -1   1  666.13   36.70
   1  -9   1  710.53   36.20
   9   1   1  650.53   35.30
  -9   0  -1   24.40    3.80
   9   0  -1   28.00    3.90
   9   0  -1   28.50    5.20
   9   0   1   23.30    3.30
   0  -9   1   24.50    4.50
   9   0   1   32.40    4.80
  -9   0   1   22.70    4.20
  -1  -9  -1  107.59    8.20
   9  -1  -1   87.19    8.10
  -9   1  -1   83.79    7.20
  -1  -9  -1  109.49   10.00
   9  -1  -1   84.99    7.20
   1   9   1  108.79    8.80
  -9   1   1   86.19    7.70
   9  -1   1   92.59    7.90
  -1  -9   1  111.09    9.00
   9  -1   1   82.59    6.60
   9  -2  -1  380.76   23.30
  -9   2  -1  395.96   22.40
   9  -2  -1  388.46   22.30
  -2  -9   1  457.75   23.80
   9  -2   1  390.66   21.70
   9  -2   1  383.86   22.90
  -2  -9   1  407.26   23.90
  -9   2   1  414.66   23.20
  -3  -9  -1   15.90    3.90
   9  -3  -1    7.40    3.20
   9  -3  -1    0.60    3.00
  -9   3  -1    8.50    2.60
   9  -3   1    4.40    2.30
  -3  -9   1   13.00    5.30
  -9   3   1    4.20    2.50
   9  -3   1    6.00    3.00
  -3  -9   1    6.00    4.20
   4   9  -1  184.88    9.70
  -9   4  -1  150.98   10.50
   9  -4  -1  138.49   10.90
   9  -4  -1  157.68   11.80
   9  -4   1  188.58   10.20
  -9   4   1  167.48   11.20
   9  -4   1  159.58   11.20
  -4  -9   1  126.99   12.90
  -9   5  -1   90.99    7.30
  -5  -9  -1   96.79    9.20
  -5  -9  -1   86.49    9.60
   9  -5  -1   89.09    8.30
   9  -5  -1   80.79    8.40
   5   9  -1  116.69    9.30
   9  -5   1   94.09    8.00
   9  -5   1   87.19    6.90
   5   9   1   99.39    8.10
  -9   5   1   87.79    7.80
  -5  -9   1  104.59    9.40
   6   9  -1   29.00    5.30
   9  -6  -1   23.90    5.60
  -9   6  -1   23.80    4.30
  -6  -9  -1   30.00    6.70
   6   9  -1   42.40    4.50
   9  -6  -1   22.60    4.70
  -6  -9  -1   34.90    6.30
  -9   6   1   37.60    5.40
   6   9   1   30.90    5.40
   6   9   1   31.00    5.20
  -6  -9   1   38.30    6.40
   9  -6   1   46.20    5.30
   9  -6   1   24.60    4.60
  -9   7  -1   -2.30    2.50
   9  -7  -1   -6.10    3.00
   7   9  -1   -2.70    3.20
   9  -7  -1   -7.60    3.70
  -7  -9   1   -2.40    3.60
   9  -7   1    4.60    2.70
   7   9   1   14.10    3.60
   7   9   1    1.30    3.20
   9  -7   1   -5.00    2.80
   9  -8  -1   60.69    8.20
  -9   8  -1   66.79    6.80
   8   9  -1   54.99    5.90
   8   9  -1   60.39    8.30
   9  -8  -1   69.89    7.90
  -8  -9  -1   80.69    9.70
   9  -8   1   52.19    7.20
  -8  -9   1   60.09    8.70
  -9   8   1   64.99    7.30
   8   9   1   57.09    7.80
   8   9   1   79.69    8.80
  -9   9  -1  420.26   25.10
   9   9  -1  406.96   26.20
   9   9  -1  441.56   23.70
   9  -9  -1  431.36   25.80
  -9  -9  -1  431.76   26.60
   9  -9  -1  439.06   26.30
  -9  -9   1  427.16   27.10
   9  -9   1  462.85   24.70
   9   9   1  438.16   24.90
   9   9   1  411.26   26.20
   9  -9   1  463.05   25.60
  -9   9   1  448.96   25.60
  10   9  -1   32.00    4.60
  10   9  -1   35.60    6.20
   9 -10  -1   37.20    6.00
   9 -10  -1   28.60    7.00
  -9  10   1   33.80    5.50
  10   9   1   35.50    5.90
  10   9   1   32.80    9.40
   9 -10   1   23.20    5.40
 -10  -9   1   36.80    6.90
  -8  10  -1   14.90    4.40
   8 -10  -1   12.00    5.40
   8 -10  -1   16.20    4.40
  10   8  -1   16.10    3.50
 -10  -8  -1   15.30    4.80
  10   8  -1   12.60    4.70
 -10  -8   1   10.80    4.60
  -8  10   1   24.50    5.20
  10   8   1   20.10    5.00
   8 -10   1   11.60    4.00
   8 -10   1   14.00    4.10
  10   8   1   24.40    4.60
  10   7  -1   38.10    4.70
  -7  10  -1   33.10    5.40
   7 -10  -1   32.10    6.30
   7 -10  -1   30.90    5.30
  10   7  -1   43.40    7.20
 -10  -7  -1   39.20    6.40
   7 -10   1   32.70    5.10
  10   7   1   41.80    6.70
 -10  -7   1   33.60    6.00
  -7  10   1   41.50    6.10
   7 -10   1   37.90    5.10
  10   6  -1   24.10    5.30
  -6  10  -1   24.90    4.50
 -10  -6  -1   25.40    5.10
   6 -10  -1   36.20    5.40
   6 -10  -1   34.90    6.10
  -6  10   1   29.60    5.00
  10   6   1   28.10    5.20
  10   6   1   26.30    4.60
   6 -10   1   20.90    4.20
   6 -10   1   24.40    4.40
 -10  -6   1   25.90    5.60
  10   5  -1  379.66   23.20
   5 -10  -1  359.46   21.70
 -10  -5  -1  364.96   22.50
  10   5  -1  352.96   20.50
  -5  10  -1  359.26   21.90
   5 -10  -1  354.76   22.70
   5 -10   1  356.86   21.40
   5 -10   1  364.76   20.90
  10   5   1  377.06   22.70
  -5  10   1  381.56   22.10
 -10  -5   1  358.56   23.00
  10   5   1  432.36   21.70
 -10  -4  -1   16.40    4.20
  10   4  -1   18.40    3.40
   4 -10  -1   10.50    3.50
   4 -10  -1    9.80    4.90
  10   4  -1   18.10    4.70
  -4  10  -1    9.10    3.60
  -4  10   1    9.20    3.60
   4 -10   1    8.80    3.40
  10   4   1   10.90    3.90
  10   4   1   14.90    3.40
 -10  -4   1   17.80    4.90
  10   3  -1   19.70    4.80
   3 -10  -1   14.50    4.90
  -3  10  -1   20.80    4.30
  10   3  -1   21.60    3.60
 -10  -3  -1   20.60    4.10
   3 -10  -1   18.00    3.70
  10   3   1   17.60    3.50
  -3  10   1   22.20    4.70
  10   3   1   17.80    4.10
   3 -10   1   20.00    3.70
 -10  -3   1   21.00    4.80
   2 -10  -1   -1.70    2.00
  10   2  -1   -5.10    2.30
   2 -10  -1   -3.30    3.50
  10   2  -1   -2.60    2.90
 -10  -2  -1    0.90    2.30
  -2  10  -1    4.10    2.50
  10   2   1    0.60    2.20
 -10  -2   1   -0.10    2.40
   2 -10   1    0.30    2.70
  10   2   1   -0.30    2.50
  -2  10   1    1.40    3.10
   1 -10  -1  254.87   15.90
   1 -10  -1  245.48   17.00
  10   1  -1  265.47   17.00
 -10  -1  -1  253.47   15.90
  10   1  -1  258.67   15.20
  10   1   1  257.87   15.10
  -1  10   1  252.97   16.50
   1 -10   1  259.07   16.00
  10   1   1  259.67   16.40
 -10  -1   1  259.07   16.60
  10   0  -1   -0.90    2.50
   0 -10  -1   11.60    4.70
  10   0  -1    8.00    3.20
 -10   0  -1   -0.20    2.20
 -10   0   1   -1.30    2.20
  10   0   1   -0.60    2.00
  10   0   1   -1.50    2.40
   0 -10   1   -0.40    2.60
  -1 -10  -1  114.99   12.00
  -1 -10  -1  141.49   10.70
  10  -1  -1  146.59    9.90
  10  -1  -1  153.98   11.40
 -10   1  -1  145.49   10.10
  -1 -10  -1  155.08   11.80
  -1 -10   1  124.59   11.40
  -1 -10   1  137.69   11.00
  10  -1   1  135.99    9.20
 -10   1   1  147.59   10.80
  10  -1   1  144.29   10.70
 -10   2  -1   18.60    3.50
  -2 -10  -1   29.60    5.20
  -2 -10  -1   24.00    5.10
  10  -2  -1   19.60    3.90
  10  -2  -1   16.60    4.10
  -2 -10  -1   25.70    6.30
 -10   2   1   14.60    3.70
  -2 -10   1   17.40    5.30
  10  -2   1   20.80    4.20
  10  -2   1   19.70    3.20
  -2 -10   1   21.10    5.30
  -3 -10  -1   28.90    5.40
  10  -3  -1   26.40    4.70
  -3 -10  -1   29.70    7.10
  10  -3  -1   20.10    5.00
 -10   3  -1   29.50    4.20
   3  10  -1   38.40    3.30
  -3 -10  -1   36.10    6.70
  -3 -10   1   41.90    6.10
  10  -3   1   28.70    3.80
 -10   3   1   23.20    4.60
  10  -3   1   26.60    4.60
  -4 -10  -1  101.69   11.70
  10  -4  -1   69.09    8.20
  -4 -10  -1   76.69    9.70
  10  -4  -1   72.19    7.60
   4  10  -1   81.29    6.10
  -4 -10  -1   90.89   10.40
 -10   4  -1   63.59    6.60
  10  -4   1   72.89    7.70
  -4 -10   1   94.39   10.70
  10  -4   1   69.29    6.40
  -4 -10   1   78.69    9.50
 -10   4   1   71.39    7.30
   5  10  -1  201.08   11.80
  10  -5   1  202.58   12.50
  -6 -10  -1   11.50    5.20
  -6 -10  -1   10.50    8.90
  10  -6  -1   10.50    4.00
 -10   6  -1   12.50    3.40
  -6 -10   1   22.40    5.20
   6  10   1   12.20    4.60
  10  -6   1   12.10    4.10
  10  -6   1   14.30    3.50
  10  -7  -1   22.40    5.70
  -7 -10  -1   34.60    7.30
  10  -7  -1   33.90    6.00
   7  10  -1   26.70    5.30
 -10   7  -1   28.10    4.60
  -7 -10   1   24.40    6.00
 -10   7   1   27.50    5.20
  10  -7   1   33.80    4.70
   7  10   1   26.70    5.10
  10  -7   1   27.80    5.30
  -9 -10  -1   17.50    5.50
  10  -9  -1   17.50    4.80
  10  -9  -1   15.50    5.60
   9  10  -1   15.50    3.30
   9  10   1   16.80    5.50
   9  10   1   10.20    4.70
  -9 -10   1   12.40    5.10
 -10   9   1   15.60    4.20
  10 -10  -1    6.70    5.00
  10  10  -1    5.20    2.70
  10 -10   1    4.80    3.70
  10  10   1    8.40    4.00
 -10 -10   1    2.60    4.10
 -10  10   1   14.30    3.80
  11  10  -1   55.19    6.20
  10 -11  -1   45.50    8.20
  10 -11   1   55.49    7.70
 -11 -10   1   46.40    8.20
  11  10   1   65.89    8.00
   9 -11  -1   86.69   11.20
  11   9  -1   98.59    7.90
   9 -11  -1   94.49   10.50
   9 -11   1   97.09    9.10
  -9  11   1   90.29    9.30
  11   9   1  101.29    9.30
 -11  -9   1   93.69   10.70
  11   8  -1   80.59    7.20
   8 -11  -1   73.89    9.40
   8 -11  -1   78.29    8.40
  11   8  -1   80.99    9.40
  -8  11   1   83.99    8.70
  11   8   1   77.39    8.50
   8 -11   1   89.69    8.40
 -11  -8   1   72.89    9.50
 -11  -7  -1  273.27   18.60
   7 -11  -1  265.77   17.50
  11   7  -1  250.97   18.50
   7 -11  -1  256.57   19.00
  11   7  -1  258.27   16.00
 -11  -7   1  268.47   18.80
  -7  11   1  274.67   17.90
   7 -11   1  315.17   17.20
  11   7   1  271.07   18.40
  11   7   1  267.37   17.00
   7 -11   1  279.67   17.50
 -11  -6  -1    9.30    4.00
  11   6  -1   12.00    4.40
  11   6  -1   12.40    3.40
  -6  11  -1    8.50    3.60
   6 -11  -1    6.70    3.40
   6 -11  -1    9.30    4.90
  -6  11   1   13.90    4.40
   6 -11   1    6.60    3.40
   6 -11   1   13.20    4.00
 -11  -6   1   12.20    4.60
  11   6   1    6.50    4.00
  11   6   1   10.50    3.70
  -5  11  -1   -2.80    3.00
  11   5  -1    1.70    2.70
  11   5  -1   -0.70    3.60
   5 -11  -1    4.50    5.00
 -11  -5  -1    3.10    3.40
   5 -11  -1   -0.10    2.80
   5 -11   1   -0.40    3.00
  11   5   1    1.00    2.80
  -5  11   1   -2.00    2.80
 -11  -5   1   -2.60    3.60
   5 -11   1   -0.50    2.80
  11   5   1    1.30    3.30
   4 -11  -1   29.30    4.90
 -11  -4  -1   33.60    5.60
   4 -11  -1   29.40    6.30
  11   4  -1   32.60    6.50
  -4  11  -1   52.29    7.30
  11   4  -1   49.99    5.80
 -11  -4   1   30.30    6.30
  11   4   1   24.70    5.30
   4 -11   1   32.60    5.20
  11   4   1   29.90    4.60
  -4  11   1   30.30    5.40
  11   3  -1 1401.66   74.39
  11   3  -1 1443.36   72.09
   3 -11  -1 1403.26   73.69
  -3  11  -1 1397.66   73.49
 -11  -3  -1 1386.36   73.59
   3 -11  -1 1392.66   73.09
  -3  11   1 1357.16   73.49
  11   3   1 1444.76   72.19
  11   3   1 1400.16   73.99
 -11  -3   1 1420.56   74.19
   3 -11   1 1379.56   72.89
 -11  -2  -1   15.40    4.10
   2 -11  -1   10.00    4.00
  11   2  -1   21.80    3.80
  -2  11  -1   21.30    4.40
  11   2  -1   14.80    4.70
  -2  11   1   14.90    4.60
  11   2   1   17.20    4.40
   2 -11   1    6.30    4.10
 -11  -2   1    3.80    4.00
   1 -11  -1  696.23   39.30
   1 -11  -1  672.03   38.30
  11   1  -1  671.03   37.60
  11   1  -1  718.93   39.80
 -11  -1  -1  713.13   38.70
  11   1   1  700.13   37.50
 -11  -1   1  732.73   39.50
  11   1   1  681.83   39.00
  -1  11   1  723.83   39.40
   1 -11   1  766.42   38.80
 -11   0  -1   84.09    8.10
   0 -11  -1  111.79   11.70
  11   0  -1   89.29    8.20
  11   0  -1   95.99    9.60
   0 -11   1   80.19    9.70
  11   0   1   90.29    7.50
 -11   0   1   87.79    8.80
   0 -11   1   79.49    9.40
  11   0   1   94.59    9.00
 -11   1  -1  328.87   20.20
  11  -1  -1  317.77   19.80
  11  -1  -1  313.67   21.40
  -1 -11   1  407.56   21.60
  -1 -11   1  407.06   22.10
  11  -1   1  311.57   19.10
 -11   1   1  329.57   20.90
  11  -1   1  331.27   21.00
  -2 -11  -1  285.07   18.20
  11  -2  -1  269.37   18.50
  -2 -11  -1  307.87   19.20
  11  -2  -1  270.27   17.00
  -2 -11  -1  283.67   19.90
 -11   2  -1  274.47   17.10
  11  -2   1  295.17   16.40
 -11   2   1  282.77   17.90
  -2 -11   1  281.27   19.70
  11  -2   1  279.67   18.10
  -2 -11   1  258.47   18.80
 -11   3  -1 1069.29   56.89
  11  -3  -1 1068.29   58.39
  11  -3  -1 1086.79   57.09
  -3 -11   1 1102.59   59.09
  11  -3   1 1065.29   57.89
 -11   3   1 1116.49   57.69
  11  -3   1 1093.29   56.09
  -3 -11   1 1089.09   58.39
  -4 -11  -1   65.69    8.60
  -4 -11  -1   71.49    9.90
  11  -4  -1   41.10    6.40
  -4 -11  -1   59.19   10.70
 -11   4  -1   47.00    6.00
  11  -4   1   52.99    7.50
  11  -4   1   45.30    6.30
  -4 -11   1   50.79    7.80
  11  -5  -1    9.10    4.20
  11  -5  -1   12.70    4.40
 -11   5  -1    7.60    3.00
   5  11  -1   12.40    2.80
   5  11   1    9.90    4.20
  -5 -11   1    7.10    4.60
 -11   5   1    6.30    3.50
  11  -5   1    9.40    4.10
  11  -5   1   11.00    3.40
  -5 -11   1   -1.20    5.00
  11  -6  -1  101.99    9.90
 -11   6  -1   89.59    8.20
  -6 -11  -1   83.69   10.50
  11  -6  -1   88.39    9.70
   6  11  -1  112.49    7.20
  11  -6   1   92.39    8.20
   6  11   1   81.89    9.20
 -11   6   1   92.49    8.90
  11  -6   1   78.79    8.80
  -6 -11   1  119.09   11.10
  11  -7  -1  603.34   34.30
   7  11  -1  587.64   31.70
  -7 -11  -1  620.94   35.80
  11  -7  -1  591.24   34.60
  -7 -11   1  578.54   35.80
 -11   7   1  599.44   33.90
  11  -7   1  647.14   32.90
   7  11   1  594.74   33.20
  11  -7   1  600.24   34.30
  11  -8  -1  150.28   12.50
   8  11  -1  146.69    9.80
  -8 -11  -1  172.48   16.10
  11  -8  -1  144.39   12.80
  11  -8   1  154.68   11.10
  -8 -11   1  143.79   13.70
 -11   8   1  138.39   11.50
   9  11  -1   93.29    7.80
  11  -9  -1  109.79   11.40
   9  11   1  113.79    9.80
  11  -9   1   99.69    9.50
  -9 -11   1  103.49   11.30
 -11   9   1  106.69    9.60
  11 -10  -1   17.00    6.10
  10  11  -1   29.70    4.20
  11 -10   1   26.60    5.40
  10  11   1   26.00    5.40
 -10 -11   1   23.80    6.60
  11  11  -1   16.90    3.60
  11 -11  -1   13.70    5.90
  11  11   1   11.80    4.70
 -11 -11   1    9.40    5.20
  11 -11   1   12.90    4.40
  11 -12  -1   -0.30    5.20
  12  11  -1    0.90    3.10
  12  11   1    2.40    4.00
  11 -12   1   -1.00    3.80
  10 -12  -1   21.60    6.50
  12  10  -1   22.90    4.10
  12  10   1   21.90    4.90
  10 -12   1   17.30    5.10
   9 -12  -1    2.00    5.10
  12   9  -1    5.60    3.30
 -12  -9   1    3.20    4.20
   9 -12   1   15.30    4.70
  12   9   1   -3.00    3.70
   8 -12  -1   -0.80    4.80
  12   8  -1   -3.10    5.50
  12   8  -1    0.20    2.70
  -8  12   1   -1.30    2.80
   8 -12   1   -2.00    3.70
  12   8   1    1.60    3.30
 -12  -8   1    2.60    3.70
   7 -12  -1   12.10    3.90
  12   7  -1   16.00    3.90
   7 -12  -1   12.10    5.60
  12   7  -1   14.00    5.00
 -12  -7   1   19.70    5.40
   7 -12   1   19.70    4.70
  -7  12   1   15.70    4.40
  12   7   1   17.00    4.30
  12   6  -1   64.29    7.20
   6 -12  -1   81.69   10.90
   6 -12  -1   92.29    8.30
  12   6  -1   60.39    8.70
  -6  12   1   85.39    8.60
  12   6   1   66.59    7.90
   6 -12   1   63.29    7.90
 -12  -6   1   70.39    9.20
  12   5  -1  111.89    9.60
   5 -12  -1  126.79   10.40
  12   5  -1  123.49   11.60
 -12  -5  -1  138.69   12.70
  -5  12  -1  139.49   11.50
   5 -12  -1   92.49   12.10
  12   5   1  123.99   11.40
  -5  12   1  126.09   10.90
 -12  -5   1  128.39   11.90
   5 -12   1  123.49   10.20
  12   5   1  110.39    9.90
   5 -12   1  101.39    9.70
  12   4  -1   18.20    5.20
   4 -12  -1   20.00    6.20
  12   4  -1   23.60    4.10
  -4  12  -1   11.30    4.70
 -12  -4  -1   22.90    4.90
   4 -12  -1   11.80    4.00
  -4  12   1   15.00    4.80
  12   4   1   19.30    4.20
   4 -12   1   17.80    4.00
  12   4   1   16.90    4.90
 -12  -4   1   26.80    5.20
   4 -12   1   12.10    4.10
 -12  -3  -1   24.10    5.00
  12   3  -1   30.90    6.40
   3 -12  -1   34.50    6.40
  12   3  -1   30.90    4.70
   3 -12  -1   30.20    5.40
  -3  12  -1   27.90    5.60
  -3  12   1   28.10    5.90
   3 -12   1   31.60    5.50
  12   3   1   26.20    5.40
  12   3   1   49.60    6.00
 -12  -3   1   25.20    5.30
 -12  -2  -1   11.00    3.90
   2 -12  -1   13.90    5.50
   2 -12  -1    7.70    3.70
  12   2  -1    8.50    3.40
  12   2  -1    8.60    4.10
  12   2   1    8.30    3.20
  12   2   1   11.90    4.20
 -12  -2   1   12.60    4.40
   2 -12   1   11.70    4.50
  -2  12   1   12.90    4.90
  12   1  -1  142.29   12.10
   1 -12  -1  145.39   11.00
 -12  -1  -1  128.19   10.50
  12   1  -1  115.99   10.20
  -1  12   1  147.59   12.40
  12   1   1  123.79    9.70
  12   1   1  132.89   11.40
 -12  -1   1  132.09   11.30
   1 -12   1  144.39   11.30
   0 -12  -1   55.59    8.60
  12   0  -1   37.10    6.40
  12   0  -1   30.80    5.30
 -12   0  -1   32.90    5.30
 -12   0   1   32.60    5.70
   0 -12   1   40.40    7.00
  12   0   1   29.00    5.60
   0  12   1   29.00    5.80
  12   0   1   32.70    4.70
   0 -12   1   32.50    5.80
  12  -1  -1   64.29    9.30
  12  -1  -1   65.29    7.90
  -1 -12  -1   80.59    8.60
  -1 -12  -1   65.49    9.80
  -1 -12  -1   78.89   10.10
 -12   1  -1   63.69    7.30
  -1 -12   1   81.69    9.20
  -1 -12   1   91.39    9.70
  12  -1   1   66.39    6.80
  12  -1   1   69.89    8.50
 -12   1   1   75.29    8.40
  12  -2  -1   -1.90    3.20
 -12   2  -1   -1.00    2.40
  -2 -12  -1    2.80    3.60
  12  -2  -1   -0.30    3.50
  -2 -12  -1    0.60    3.80
  12  -2   1    0.20    2.50
  -2 -12   1   -1.70    4.40
  12  -2   1   -4.30    2.90
  -2 -12   1    1.60    4.20
 -12   2   1   -3.40    2.60
  12  -3  -1   47.70    6.40
  12  -3  -1   42.90    6.80
 -12   3  -1   51.49    6.30
  -3 -12  -1   55.99    8.70
  -3 -12  -1   64.19   10.00
  -3 -12  -1   46.50    8.10
  12  -3   1   58.29    7.60
  12  -3   1   59.69    6.20
 -12   3   1   48.40    6.80
  12  -4  -1    3.00    4.00
  -4 -12  -1    9.90    6.50
  12  -4  -1    7.90    4.10
  -4 -12  -1    8.10    7.30
   4  12  -1    8.70    2.50
 -12   4  -1    5.00    3.20
  12  -4   1    3.10    3.80
  -4 -12   1   21.60    7.10
  12  -4   1   12.60    3.50
  -4 -12   1    5.80    5.80
 -12   4   1    3.60    3.20
  12  -5  -1  166.38   13.20
  12  -5  -1  167.28   13.90
   5  12  -1  161.38   10.40
  -5 -12  -1  191.58   16.00
   5  12   1  174.28   12.50
  12  -5   1  166.88   13.40
  12  -5   1  186.38   11.80
 -12   5   1  158.98   12.50
  -5 -12   1  175.88   14.50
  -5 -12   1  165.18   15.00
  12  -6  -1    5.30    4.60
   6  12  -1   14.70    3.00
  -6 -12  -1    5.70    4.60
  12  -6  -1    3.90    4.10
   6  12   1    9.60    4.70
  -6 -12   1   12.00    5.00
 -12   6   1    2.20    3.60
  12  -6   1    3.00    3.60
   7  12  -1   41.00    5.30
  12  -7  -1   37.40    6.60
  12  -7  -1   40.30    7.30
 -12   7   1   35.60    5.80
  -7 -12   1   49.10    9.00
  12  -7   1   43.10    5.70
   7  12   1   50.99    6.80
  12  -8  -1   17.50    5.70
   8  12  -1   15.30    3.30
   8  12   1   26.50    5.60
 -12   8   1   17.20    5.80
  12  -8   1   12.90    4.30
  -8 -12   1   25.60    7.10
  12  -9  -1   11.60    6.00
   9  12  -1   29.10    4.00
  -9 -12   1   27.50    6.90
  12  -9   1   18.40    4.70
   9  12   1   23.70    5.80
  12 -10  -1    0.10    5.00
  10  12  -1    2.50    2.80
  10  12   1    4.70    4.30
  12 -10   1    0.70    4.00
 -10 -12   1    1.50    4.40
  11  12  -1   16.10    3.70
  12 -11  -1   24.60    6.90
  11  12   1   20.60    5.50
  12 -11   1   19.60    5.30
  12 -12  -1    1.70    5.70
  12  12  -1   -2.00    2.90
  12 -12   1   -5.00    3.90
  12  12   1   -2.50    4.00
  12 -13  -1    0.90    6.10
  13  12  -1    1.80    3.50
  12 -13   1    2.00    5.10
  13  12   1    1.90    4.40
  11 -13  -1   98.59   12.40
  13  11  -1   98.29    9.10
  13  11   1  101.89   10.40
  11 -13   1  126.69   11.80
  13  10  -1   14.10    3.80
  10 -13  -1    9.50    6.00
  13  10   1    8.70    4.50
  10 -13   1    7.40    5.10
   9 -13  -1  135.69   14.80
  13   9  -1  166.58   11.30
   9 -13   1  146.29   12.80
  13   9   1  154.28   12.00
   8 -13  -1   39.40    7.50
  13   8  -1   43.70    5.50
  13   8   1   44.10    6.20
   8 -13   1   26.70    6.20
   7 -13  -1   -0.30    5.20
  13   7  -1    4.60    3.50
   7 -13   1   14.20    4.50
  -7  13   1   -0.10    3.30
 -13  -7   1    2.50    4.10
  13   7   1   -2.00    3.60
   6 -13  -1   19.90    4.70
   6 -13  -1   10.00    5.70
  13   6  -1   14.10    5.20
  13   6  -1   14.50    3.80
  -6  13   1   14.00    4.90
   6 -13   1   16.20    4.40
 -13  -6   1   20.20    5.70
  13   5  -1   83.09    9.80
   5 -13  -1   80.99    8.50
  13   5  -1   89.09    8.00
   5 -13  -1   73.99    9.80
 -13  -5   1   74.09    9.60
  13   5   1   75.69    8.00
  -5  13   1   83.89    9.20
   5 -13   1   77.79    8.20
   4 -13  -1  139.29   13.20
   4 -13  -1  151.88   11.80
  13   4  -1  153.38   13.20
  13   4  -1  150.18   11.10
  13   4   1  150.28   11.10
 -13  -4   1  156.58   12.90
  -4  13   1  163.18   13.00
   3 -13  -1    7.40    4.90
   3 -13  -1    9.70    3.70
  13   3  -1    1.10    3.50
  13   3  -1    7.20    3.80
   3 -13   1    4.70    5.80
 -13  -3   1    8.50    4.40
  13   3   1    8.00    3.50
  -3  13   1    2.80    3.70
  13   2  -1   53.19    7.90
  13   2  -1   55.19    6.60
   2 -13  -1   69.89    9.10
   2 -13  -1   54.89    7.30
  13   2   1   55.39    6.40
   2 -13   1   68.19    8.80
  -2  13   1   73.99    9.40
 -13  -2   1   60.99    8.40
  13   2   1   49.10    8.10
   1 -13  -1    3.30    3.50
   1 -13  -1   -1.40    5.80
  13   1  -1    2.10    4.10
  13   1  -1    6.40    3.80
  13   1   1    4.20    3.20
   1 -13   1    6.40    3.80
  -1  13   1   -2.00    4.50
  13   1   1    2.20    4.00
 -13  -1   1    8.90    4.00
  13  -1  -1  757.92   42.10
  13  -1  -1  717.33   39.90
  -1 -13  -1  790.22   43.70
  -1 -13  -1  750.32   41.80
  -1 -13  -1  691.23   41.50
  -1 -13   1  717.83   41.20
  -1 -13   1  731.83   40.80
  13  -1   1  721.73   39.10
  13  -1   1  730.13   41.40
 -13   1   1  743.43   41.20
  13  -2  -1   27.60    5.30
  13  -2  -1   32.50    6.60
  13  -2   1   22.40    4.20
  13  -2   1   20.60    5.80
  -2 -13   1   23.70    7.20
  -2 -13   1   21.80    6.10
 -13   2   1   19.40    5.20
  -3 -13  -1  872.81   43.00
  -3 -13  -1  754.02   42.20
  13  -3  -1  696.63   40.30
  13  -3  -1  705.43   41.80
  -3 -13   1  696.53   41.30
  -3 -13   1  737.43   43.00
  13  -3   1  728.13   39.30
 -13   3   1  724.23   40.90
  -4 -13  -1   35.90    8.90
  13  -4  -1   19.20    5.40
  13  -4  -1   16.50    5.00
  13  -4   1   21.30    4.50
 -13   4   1   17.50    4.50
  13  -5  -1   17.80    5.20
  13  -5  -1   24.60    5.50
  -5 -13  -1   28.10    7.30
 -13   5   1   22.20    4.60
   5  13   1   18.10    5.10
  13  -5   1   30.30    4.80
  -5 -13   1   12.60    6.10
  13  -6  -1   -4.10    4.00
   6  13   1   -3.00    4.10
  13  -6   1   -1.20    3.30
 -13   6   1   -3.10    3.10
  -6 -13   1   -0.10    4.00
   7  13  -1  573.54   31.00
  13  -7  -1  567.34   33.30
   7  13   1  560.34   31.80
  13  -7   1  590.54   31.90
  -7 -13   1  557.04   34.70
  13  -8  -1    2.90    4.80
   8  13   1   10.60    4.70
  -8 -13   1   -2.00    5.30
  13  -9  -1  274.47   19.50
   9  13  -1  241.88   15.60
   9  13   1  268.27   17.40
  13  -9   1  279.37   17.70
  -9 -13   1  266.97   20.40
  13 -10  -1   -8.60    4.80
  10  13  -1   -2.30    2.70
  10  13   1    2.60    4.30
  13 -10   1   -3.50    3.90
  13 -11  -1   15.20    7.40
  11  13  -1   24.50    4.20
  13 -11   1   15.70    5.70
  11  13   1   14.90    5.70
  13 -12  -1   43.70    9.00
  12  13  -1   33.60    5.10
  13 -12   1   41.30    7.30
  12  13   1   50.39    7.10
  13 -13  -1   63.49   11.20
  13  13  -1   79.19    8.80
  13  13   1   79.59   10.10
  13 -13   1   81.09   11.10
  13 -14  -1   53.49   10.50
  14  13  -1   47.60    7.20
  14  13   1   50.79    7.40
  14  12  -1    4.50    3.90
  12 -14  -1    5.50    6.80
  14  12   1    7.50    4.60
  14  11  -1   19.10    4.70
  11 -14  -1    7.60    7.40
  14  11   1   15.40    5.10
  14  10  -1    3.70    3.60
  10 -14  -1   13.10    6.60
  14  10   1    3.30    4.00
   9 -14  -1   14.40    6.60
  14   9  -1   15.30    4.10
  14   9   1   13.20    4.60
  14   8  -1   16.10    4.50
   8 -14  -1   11.70    6.30
  14   8   1   25.40    5.10
   7 -14  -1   22.30    7.00
  14   7   1   30.20    5.30
   6 -14  -1    4.10    5.20
  14   6  -1   10.20    3.60
  14   6   1    4.30    3.50
  14   5  -1   10.80    4.10
   5 -14  -1   11.10    5.70
  14   5   1   11.50    4.10
  -5  14   1   15.60    5.40
   4 -14  -1   -2.20    4.60
  14   4  -1    1.80    3.60
 -14  -4   1    2.20    3.50
  -4  14   1    5.90    4.20
  14   4   1    3.90    3.50
  14   3  -1    9.50    5.30
   3 -14  -1    5.30    5.50
  14   3  -1    8.80    4.10
  14   3   1   10.20    3.60
 -14  -3   1    5.70    3.90
  -3  14   1    9.00    5.00
  14   2  -1    2.20    3.70
  14   2  -1   -0.20    3.70
   2 -14  -1   -0.90    4.70
  14   2   1   -0.20    3.00
  -2  14   1    4.50    5.10
 -14  -2   1    4.50    3.80
  14   1  -1   -6.50    3.00
   1 -14  -1   -2.20    5.10
  14   1  -1   -4.10    3.50
  14   1   1   -2.30    2.70
  -1  14   1   -6.00    3.50
 -14  -1   1    1.20    3.20
  14   0  -1    7.20    4.30
   0 -14  -1    7.10    5.50
   0 -14  -1    1.00    6.10
  14   0  -1    4.70    4.10
  14   0   1   11.20    3.60
   0 -14   1    5.00    4.60
 -14   0   1    7.90    4.20
  14  -1  -1   62.59    8.20
  -1 -14  -1   77.29   10.90
  -1 -14  -1   72.39   10.30
  14  -1  -1   52.49    8.30
  14  -1   1   74.79    7.30
 -14   1   1   60.39    8.40
  -1 -14   1   68.69    9.50
  14  -2  -1    0.60    3.50
  14  -2  -1    1.90    5.40
  -2 -14  -1   -5.90    6.00
  -2 -14  -1   -3.00    4.50
 -14   2   1   -2.40    3.00
  -2 -14   1    4.90    5.90
  14  -2   1    2.70    3.20
  -3 -14  -1   24.20    7.50
  -3 -14  -1   17.80    7.50
  14  -3  -1   17.10    4.90
 -14   3   1   12.70    4.90
  -3 -14   1   31.50    8.80
  14  -3   1   18.30    4.20
  14  -4  -1   75.99    9.20
  14  -4   1   64.39    7.90
  -4 -14   1   83.59   11.70
  14  -5  -1  208.08   14.90
   5  14   1  198.18   13.80
  -5 -14   1  184.58   16.70
  14  -5   1  174.78   13.30
  14  -6   1   74.89    9.10
   6  14   1   66.09    8.80
  -6 -14   1   91.69   11.70
  -7 -14   1   13.10    6.10
   7  14   1   23.00    5.40
  14  -7   1   32.30    5.50
  14  -8  -1   -4.90    4.60
   8  14   1   -2.00    4.60
  14  -8   1   -0.50    3.80
  -8 -14   1   19.10    6.40
  14  -9  -1   32.40    7.80
   9  14   1   35.40    7.10
  14  -9   1   46.00    7.10
  14 -11  -1   32.00    8.20
  14 -11   1   28.20    6.60
  11  14   1   37.00    6.70
  14 -12  -1   14.20    7.40
  14 -12   1    8.60    5.40
  12  14   1    6.00    4.80
  14 -13  -1    8.50    7.20
  13  14   1    1.80    4.70
  14 -13   1    5.00    5.30
  14 -14  -1   -6.40    6.60
  14  14   1   -0.20    4.20
  14 -15  -1   21.40    8.50
  15  14   1   15.00    5.30
  13 -15  -1   -3.10    6.90
  15  13  -1   -6.10    5.70
  15  13   1   -4.60    4.10
  15  12  -1    0.00    4.00
  12 -15  -1   -6.30    6.40
  15  12   1    3.00    4.20
  11 -15  -1  221.08   18.60
  15  11  -1  172.28   13.50
  15  11   1  179.58   14.00
  10 -15  -1   24.70    8.20
  15  10  -1   24.30    5.30
  15  10   1   17.30    5.20
  15   9  -1  184.58   13.40
   9 -15  -1  188.28   17.30
  15   9   1  185.68   13.80
   8 -15  -1   -1.70    5.60
  15   8  -1   -2.00    3.60
  15   8   1   -0.80    3.90
  15   7  -1    4.40    3.50
   7 -15  -1    2.70    5.30
  15   7   1    0.10    3.70
  15   6  -1   11.30    4.50
   6 -15  -1   18.50    6.50
  15   6   1   18.40    4.80
   5 -15  -1  159.58   15.00
  15   5  -1  170.98   12.80
  15   5   1  178.08   12.60
  15   4  -1   34.00    5.80
   4 -15  -1   24.80    7.00
  15   4   1   34.20    5.60
   3 -15  -1  351.66   24.20
  15   3  -1  373.16   22.50
  -3  15   1  397.06   25.80
  15   3   1  376.46   22.20
  15   2  -1   -2.90    3.50
   2 -15  -1   -0.90    5.90
  -2  15   1    0.60    4.20
  15   2   1   -4.40    3.00
  15   1  -1    6.30    4.00
   1 -15  -1    1.50    5.60
  15   1   1    1.80    3.10
   1 -15   1    2.20    4.40
  -1  15   1   19.20    5.50
  15   0  -1  105.69   10.00
   0 -15  -1  106.59   12.40
  15   0   1   98.99    9.10
   0 -15   1  113.69   12.10
  -1 -15  -1   58.19    9.80
  15  -1  -1   47.20    6.90
  15  -1   1   54.79    7.00
  -1 -15   1   75.49   10.90
  15  -2  -1   75.99    8.80
  -2 -15  -1   67.79   10.50
  -2 -15   1   63.29   10.80
  15  -2   1   62.19    7.90
  -3 -15  -1    0.80    7.30
  15  -3  -1    4.10    4.50
  -3 -15   1   11.60    8.50
  15  -3   1    5.60    3.80
  15  -4  -1    9.00    4.90
   4  15   1   10.50    4.60
  15  -4   1   -1.10    3.80
  -4 -15   1   16.50    6.80
  15  -5  -1   -1.20    4.80
  15  -5   1   -0.10    3.80
   5  15   1    4.10    4.60
  -5 -15   1    4.80    5.40
  15  -6  -1   25.50    6.80
   6  15   1   38.30    6.40
  -6 -15   1   40.10    8.20
  15  -6   1   23.20    5.60
  15  -7  -1   54.89    9.00
  15  -7   1   60.09    7.70
   7  15   1   63.79    7.90
  -7 -15   1   48.70    9.60
   8  15   1   86.99   10.70
  15  -8   1  109.49   10.90
  15  -9  -1   16.20    6.60
   9  15   1   17.30    5.70
  15  -9   1   21.60    6.00
  15 -10  -1    8.20    6.60
  10  15   1   14.10    5.50
  15 -10   1   14.10    5.80
  15 -11  -1  116.79   14.70
  11  15   1  115.69   11.70
  15 -11   1  121.79   13.10
  15 -12  -1    3.90    6.90
  15 -12   1   -1.00    5.10
  12  15   1   -0.90    4.60
  15 -13  -1  280.97   22.80
  13  15   1  271.47   18.50
  15 -13   1  268.87   20.40
  15 -14  -1    2.60    7.10
  14  15   1   -7.30    4.10
  15 -15  -1    4.40    7.60
  15  15   1   -3.60    4.40
  16  15   1   -2.70    4.50
  14 -16  -1   -2.30    8.40
  16  14   1   -0.20    4.70
  13 -16  -1    8.50    7.50
  16  13   1    4.00    4.90
  12 -16  -1   10.70    8.00
  16  12  -1    6.90    4.70
  16  12   1    6.30    4.90
  16  11  -1    0.50    4.20
  11 -16  -1   -1.20    6.60
  16  11   1    2.80    4.40
  10 -16  -1    0.10    6.60
  16  10  -1   -3.00    4.10
  16  10   1    0.70    4.20
   9 -16  -1   42.30    9.50
  16   9  -1   46.90    6.90
  16   9   1   50.59    7.20
  16   8  -1   32.70    6.10
   8 -16  -1   37.20    8.90
  16   8   1   47.60    6.70
  16   7  -1   82.09    9.20
   7 -16  -1   59.59   10.20
  16   7   1   86.99    9.40
   6 -16  -1   12.10    6.60
  16   6  -1   14.40    4.80
  16   5  -1    1.10    3.80
   5 -16  -1    2.60    5.80
  16   5   1    3.50    3.80
   4 -16  -1    6.40    5.80
  16   4  -1   10.70    4.40
  16   4   1    6.30    3.90
   3 -16  -1   12.50    7.00
  16   3  -1   13.00    4.80
  16   3   1   12.80    4.20
  16   2  -1   -4.70    3.80
   2 -16  -1   -8.40    5.40
  16   2   1    4.20    3.50
  16   1  -1   30.30    6.10
   1 -16  -1   46.30    8.80
   1 -16   1   22.00    6.40
  16   1   1   34.50    5.60
  16   0  -1   -2.50    4.10
   0 -16  -1   15.40    7.50
  16   0   1   -0.30    3.60
   0 -16   1    2.00    3.90
  16  -1  -1   -3.80    3.80
  -1 -16  -1   -1.60    6.70
  -1 -16   1    3.80    5.60
  16  -1   1    1.60    3.80
  -2 -16  -1   -0.80    6.80
  16  -2  -1   -0.50    4.20
  -2 -16   1   -4.00    5.40
  16  -2   1    0.40    3.60
  16  -3  -1    9.40    5.10
  -3 -16   1   16.80    8.80
  16  -3   1    4.50    4.10
  16  -4  -1    6.30    4.90
  -4 -16   1    3.30    6.20
  16  -4   1    7.30    4.50
   4  16   1   10.30    5.20
  16  -5  -1   -0.30    4.80
  -5 -16   1   -2.20    4.50
   5  16   1    4.60    5.10
  16  -5   1   -1.50    4.20
  16  -6  -1    3.30    5.50
  16  -6   1   -1.70    4.20
   6  16   1    6.20    4.50
  16  -7  -1   -2.90    5.10
   7  16   1    4.50    5.60
  16  -7   1   -3.30    4.00
  16  -8  -1   20.20    7.30
  16  -8   1   24.10    6.20
   8  16   1   20.50    6.90
  16  -9  -1    6.60    6.20
   9  16   1    9.10    6.40
  16  -9   1    7.50    5.40
  16 -10  -1   26.70    8.40
  10  16   1   33.80    9.30
  16 -10   1   13.10    6.40
  16 -11  -1   11.40    7.30
  16 -11   1    2.20    5.80
  16 -12  -1   -5.30    6.40
  16 -12   1    5.50    6.00
  16 -13  -1   -1.70    7.10
  16 -13   1    1.10    5.70
  16 -14  -1    5.50    7.80
  16 -15  -1   15.00    9.20
  17  15   1   86.69   11.90
  17  14   1    4.70    5.60
  17  13   1   -1.10    4.70
  17  12  -1    3.00    4.90
  17  12   1    8.70    5.20
  17  11  -1    4.70    4.80
  17  11   1    7.40    5.10
  17  10  -1   32.40    6.60
  17  10   1   26.50    6.20
  17   9  -1    0.40    4.30
  17   9   1   -0.40    4.40
  17   8  -1   10.80    5.10
  17   8   1    5.60    4.60
  17   7  -1    3.10    4.20
  17   7   1    0.50    4.20
  17   6  -1   31.80    6.30
  17   6   1   22.80    5.60
  17   5  -1   48.40    7.20
  17   5   1   38.60    6.40
  17   4  -1   32.20    6.70
  17   4   1   40.50    6.20
  17   3  -1   19.80    5.60
  17   3   1   15.90    5.10
  17   2  -1   -1.70    4.20
  17   2   1   -1.40    3.80
   2 -17   1    1.80    4.80
  17   1  -1   62.99    8.60
   1 -17   1   54.09    9.40
  17   0  -1    1.30    4.60
   0 -17   1   -0.90    4.60
  17   0   1    8.30    4.40
  17  -1  -1  363.16   23.80
  -1 -17   1  370.76   26.50
  17  -1   1  381.16   22.90
  17  -2  -1   10.20    5.40
  -2 -17   1    3.90    7.00
  17  -2   1    7.10    4.60
  17  -3  -1   68.69   10.00
  17  -3   1   73.99    8.90
  -3 -17   1  128.29   17.50
  17  -4  -1   -2.10    5.30
  17  -4   1    0.10    4.40
  17  -5  -1   57.79    9.50
  17  -5   1   56.59    8.30
  17  -6  -1    4.00    6.00
  17  -6   1    2.50    4.80
  17  -7  -1   63.79   10.30
  17  -7   1   82.69   10.70
  17  -8  -1   24.20    8.10
  17  -8   1   29.10    7.20
  17  -9  -1   30.80    8.60
  17  -9   1   24.90    7.40
  17 -10  -1    6.70    7.80
  17 -10   1   -1.10    5.70
  17 -11  -1    2.70    7.80
  17 -11   1    9.30    6.30
  17 -12  -1   51.09   11.20
  17 -12   1   59.79   10.10
  17 -13  -1    1.60    7.70
  17 -13   1    2.60    7.20
  17 -14  -1   20.60    9.70
  17 -15  -1    2.20    8.20
  18  14   1   -2.30    4.90
  18  13   1    6.60    5.50
  18  12  -1    4.20    5.10
  18  12   1    3.80    5.10
  18  11  -1    8.90    5.40
  18  11   1    1.20    4.90
  18  10  -1    7.60    5.20
  18  10   1    6.40    4.80
  18   9  -1    2.40    4.80
  18   9   1   -1.70    4.40
  18   8  -1    7.10    5.20
  18   8   1   -1.00    4.30
  18   7  -1    4.20    4.70
  18   7   1    2.90    4.40
  18   6  -1    8.20    5.40
  18   6   1    7.40    4.90
  18   5  -1    2.40    4.90
  18   5   1    3.50    4.50
  18   4  -1    4.70    5.20
  18   4   1    6.00    4.60
  18   3  -1   -6.10    4.90
  18   3   1    2.80    4.40
  18   2  -1   14.70    5.90
   2 -18   1   31.40    6.90
  18   2   1   11.30    4.80
  18   1  -1   14.70    6.30
   1 -18   1    9.50    5.40
  18   1   1   16.50    5.30
  18   0  -1    0.10    4.80
  18   0   1    3.40    4.50
   0 -18   1    0.00    6.40
  18  -1  -1    6.30    5.40
  18  -1   1    1.80    4.40
  18  -2  -1   10.50    6.00
  18  -2   1    3.70    4.90
  18  -3  -1   73.29   10.50
  18  -3   1   78.09   10.50
  18  -4  -1    7.50    6.40
  18  -4   1   15.00    5.90
  18  -5  -1   41.60    9.10
  18  -5   1   36.30    7.30
  18  -6  -1    8.00    6.50
  18  -6   1    3.00    5.20
  18  -7  -1    2.60    6.30
  18  -7   1    2.30    5.40
  18  -8  -1    1.50    6.90
  18  -8   1   -1.90    5.60
  18  -9  -1   -1.60    6.90
  18  -9   1   -2.80    5.70
  18 -10  -1   -3.80    7.10
  18 -10   1   -0.70    5.90
  18 -11  -1   -3.80    7.50
  18 -11   1   -5.20    6.10
  18 -12  -1    3.50    8.40
  18 -12   1    4.50    6.60
  18 -13  -1    2.10    7.90
  18 -14  -1    9.40    9.30
  19  12  -1    6.30    6.00
  19  12   1    7.90    5.70
  19  11  -1  113.29   13.00
  19  11   1  116.69   12.30
  19  10  -1   19.40    6.70
  19  10   1   29.30    6.60
  19   9  -1   72.99   10.00
  19   9   1   85.29   10.80
  19   8  -1   -3.70    5.00
  19   8   1    3.00    4.60
  19   7  -1    9.70    5.80
  19   7   1    8.70    5.20
  19   6  -1   37.80    7.70
  19   6   1   38.60    7.30
  19   5  -1   78.69   10.20
  19   5   1   67.79    9.10
  19   4  -1   45.20    8.30
  19   4   1   37.00    7.20
  19   3  -1   37.30    7.90
  19   3   1   39.00    7.30
  19   2  -1   14.30    6.40
  19   2   1   10.30    5.30
  19   1  -1    6.10    5.90
  19   1   1   -2.20    4.70
  19   0  -1   47.30    9.00
  19   0   1   57.89    8.20
  19  -1  -1    8.20    6.00
  19  -1   1    4.10    5.10
  19  -2  -1    4.80    6.30
  19  -2   1    0.90    4.90
  19  -3  -1   28.80    8.20
  19  -3   1   26.50    6.90
  19  -4  -1    5.40    6.30
  19  -4   1    4.40    5.40
  19  -5  -1   45.00    9.20
  19  -5   1   36.60    7.90
  19  -6  -1   -2.70    6.20
  19  -6   1   22.70    6.70
  19  -7  -1  118.19   15.90
  19  -7   1  124.69   14.50
  19  -8  -1    1.70    7.30
  19  -8   1    4.80    6.30
  19  -9  -1   -1.20    7.40
  19  -9   1    5.20    6.80
  19 -10  -1   14.40    8.70
  19 -10   1   -2.50    6.20
  19 -11  -1   98.39   15.00
  19 -11   1  115.79   15.30
  19 -12  -1   10.00    8.70
  19 -12   1   17.60    8.10
  20  11  -1    2.70    6.10
  20  11   1   -3.40    4.90
  20  10  -1   -4.90    5.60
  20  10   1    3.80    5.60
  20   9  -1   20.60    7.90
  20   9   1   45.70    7.80
  20   8  -1    3.40    6.20
  20   8   1    1.90    5.30
  20   7  -1   18.20    7.10
  20   7   1   22.90    6.40
  20   6  -1    1.60    5.60
  20   6   1   -0.30    4.80
  20   5  -1    2.20    5.90
  20   5   1   -0.60    5.00
  20   4  -1   -0.90    5.70
  20   4   1    0.20    5.20
  20   3  -1    4.00    6.10
  20   3   1    2.50    5.20
  20   2  -1   -0.60    5.70
  20   2   1   -0.60    5.10
  20   1  -1    2.40    6.10
  20   1   1    3.90    5.50
  20   0  -1   -3.10    5.60
  20   0   1   -8.30    4.90
  20  -1  -1    2.20    6.30
  20  -1   1    3.40    5.90
  20  -2  -1    7.90    6.70
  20  -2   1    8.80    6.00
  20  -3  -1    0.20    6.00
  20  -3   1   -2.40    5.50
  20  -4  -1    1.40    6.80
  20  -4   1    4.10    5.70
  20  -5  -1   -0.10    7.20
  20  -5   1    4.70    6.10
  20  -6  -1   -2.60    7.10
  20  -6   1    8.10    6.60
  20  -7  -1    2.40    7.40
  20  -7   1    2.80    6.40
  20  -8  -1    0.50    8.30
  20  -8   1    3.30    6.80
  20  -9  -1   16.00    9.20
  20  -9   1   16.00    7.80
  20 -10  -1    3.80    8.20
  20 -10   1    7.20    7.50
  20 -11  -1   10.10    9.00
  20 -11   1    6.30    7.20
  21   9  -1   47.00    9.30
  21   9   1   43.50    8.00
  21   8  -1    6.80    6.90
  21   8   1    5.40    5.50
  21   7  -1   35.10    8.60
  21   7   1   27.40    7.30
  21   6  -1   13.30    6.90
  21   6   1    1.20    5.40
  21   5  -1  148.69   16.00
  21   5   1  171.78   15.20
  21   4  -1   -8.70    6.10
  21   4   1   -3.10    5.50
  21   3  -1    2.60    6.40
  21   3   1   -2.60    5.60
  21   2  -1   13.80    7.10
  21   2   1   12.40    6.50
  21   1  -1  102.99   14.30
  21   1   1  113.89   13.50
  21   0  -1   40.60    9.30
  21   0   1   42.40    8.60
  21  -1  -1  111.89   14.70
  21  -1   1   93.29   12.20
  21  -2  -1    6.30    7.40
  21  -2   1    6.50    6.60
  21  -3  -1    1.80    7.40
  21  -3   1   -3.50    6.30
  21  -4  -1   -3.60    7.10
  21  -4   1    4.50    6.60
  21  -5  -1   11.50    8.70
  21  -5   1   11.20    7.20
  21  -6  -1   22.00    9.20
  21  -6   1   12.70    7.60
  21  -7  -1   -5.10    7.80
  21  -7   1    2.50    6.80
  21  -8  -1   -0.50    8.30
  21  -8   1   -4.10    6.60
  21  -9  -1   -2.50    7.90
  21  -9   1    8.40    7.50
  22   6  -1    0.30    6.40
  22   6   1    2.50    5.90
  22   5  -1    5.50    6.80
  22   5   1    0.20    5.80
  22   4  -1    1.10    7.30
  22   4   1   10.40    6.90
  22   3  -1   28.90    9.00
  22   3   1   34.20    8.60
  22   2  -1   -1.80    6.30
  22   2   1   -2.20    5.80
  22   1  -1    8.80    7.60
  22   1   1   12.60    7.20
  22   0  -1    1.90    7.00
  22   0   1   -2.80    6.30
  22  -1  -1   20.70    9.00
  22  -1   1    7.80    7.30
  22  -2  -1   -3.20    8.10
  22  -2   1    2.50    7.30
  22  -3  -1   17.40    9.30
  22  -3   1   26.30    8.30
  22  -4  -1    6.00    8.30
  22  -4   1   -0.30    6.60
  22  -5  -1    7.40    8.40
  22  -5   1   -1.70    6.50
  22  -6  -1   10.10    8.70
  22  -6   1   -2.20    6.90
   0   0  -2 2411.26  121.89
   0   1  -2  482.75   22.50
   0  -1  -2  384.16   22.60
   1   0  -2  351.36   22.00
   1  -1  -2  156.18    9.70
   1   1  -2  127.19    8.90
  -1   1   2  134.29    7.80
   2   1  -2 1024.80   52.89
   1  -2  -2 1038.50   52.39
   1  -2  -2 1075.49   53.79
   2   1  -2 1040.30   52.59
  -2  -1  -2 1078.59   54.09
  -1   2  -2  952.80   52.99
  -1   2   2 1023.10   52.29
   0   2  -2  243.08   16.10
   2   0  -2  277.27   16.10
   2   0  -2  293.87   15.50
   0   2   2  325.27   15.20
  -2   0   2  280.47   15.40
   1   2  -2  866.31   46.10
   2  -1  -2  861.11   45.90
   2  -1  -2  993.80   46.90
  -2   1  -2  904.81   46.90
  -1  -2  -2  874.21   47.40
  -1  -2   2  853.01   45.80
  -2   1   2  945.11   45.90
  -2  -2  -2   88.59    9.20
   2   2  -2   96.89    6.60
   2  -2  -2  111.69    6.80
   2   2  -2  100.89    7.00
  -2   2  -2  106.09    8.40
  -2   2   2  108.59    6.50
  -2  -2   2   95.09    6.70
  -3  -2  -2  180.48   13.80
   2  -3  -2  197.58   11.50
   2  -3  -2  214.68   13.00
   3   2  -2  203.48   11.60
   3   2  -2  202.38   11.80
  -3  -2   2  199.08   11.70
  -2   3   2  194.58   11.30
   1  -3  -2  876.01   42.60
   3   1  -2  757.92   41.30
  -3  -1  -2  828.12   42.90
  -1   3  -2  771.02   41.20
   1  -3  -2  864.11   41.00
   3   1  -2  767.82   41.30
  -1   3   2  788.12   40.90
  -3  -1   2  753.62   41.30
   0  -3  -2   63.59    7.30
   3   0  -2   51.29    4.80
   0  -3  -2   51.49    4.10
   3   0  -2   62.79    5.40
   0   3  -2   45.50    5.30
   0   3   2   48.90    4.10
  -3   0   2   56.19    4.60
  -1  -3  -2   28.60    2.90
   3  -1  -2   32.50    3.40
  -1  -3  -2   29.20    5.50
   3  -1  -2   30.40    3.90
   1   3   2   32.20    3.50
  -3   1   2   27.90    3.30
   2   3  -2   84.69    6.70
   3  -2  -2  122.29    7.90
  -2  -3  -2   77.59    8.90
   2   3  -2   88.79    6.30
  -2  -3  -2   96.49    5.90
   3  -2  -2   96.69    6.60
  -2  -3   2   96.89    6.70
  -3   2   2  100.29    6.40
   2   3   2   96.09    6.30
   3  -3  -2 1572.34   73.99
   3   3  -2 1359.26   73.39
  -3  -3  -2 1374.66   73.19
  -3  -3  -2 1407.46   75.29
   3   3  -2 1500.05   74.09
   3  -3  -2 1508.25   74.69
   3   3   2 1371.36   73.39
  -3  -3   2 1424.46   74.09
  -3   3   2 1612.94   73.89
   3  -3   2 1394.06   73.19
   4   3  -2   66.09    5.80
   4   3  -2   86.59    5.90
   3  -4  -2   59.49    6.50
   3  -4  -2   61.69    5.30
  -3   4   2   65.39    5.20
  -4  -3   2   63.59    5.90
   4   3   2   69.39    5.20
   2  -4  -2  231.68   14.90
  -4  -2  -2  231.08   16.10
   4   2  -2  247.08   13.60
   4   2  -2  260.77   14.20
   2  -4  -2  235.28   13.40
  -2   4   2  223.38   13.30
   4   2   2  235.88   13.10
   2  -4   2  222.38   12.70
  -4  -2   2  239.28   13.90
   2  -4   2  238.18   13.00
   1  -4  -2  468.35   24.20
  -1   4  -2  415.16   24.10
   4   1  -2  468.85   24.80
   4   1  -2  468.55   24.60
   1  -4  -2  478.15   25.90
  -4  -1   2  460.85   24.70
   1  -4   2  449.66   24.10
   0  -4  -2  397.16   21.40
   4   0  -2  439.36   22.20
   4   0  -2  452.85   22.30
   0  -4  -2  365.36   23.20
   0   4   2  382.46   21.50
   4   0   2  410.96   21.90
   0  -4   2  356.46   21.50
  -4   0   2  438.46   22.10
   1   4  -2  288.87   15.80
   4  -1  -2  280.87   16.40
   4  -1  -2  327.17   17.00
  -4   1   2  301.57   16.50
  -1  -4   2  264.87   16.20
   4  -1   2  297.87   16.20
   2   4  -2   57.69    4.80
  -2  -4  -2   59.69    4.70
   4  -2  -2   77.09    6.20
  -2  -4  -2   58.39    4.30
   4  -2  -2   46.30    5.00
   2   4  -2   49.30    4.60
  -2  -4  -2   50.39    6.40
   2   4   2   41.60    4.80
   4  -2   2   59.79    4.70
  -4   2   2   51.59    4.70
  -2  -4   2   58.89    4.90
  -3  -4  -2   60.59    5.30
   3   4  -2   78.29    5.40
   4  -3  -2   67.69    5.90
  -3  -4  -2   73.59    5.20
  -3  -4  -2   62.59    8.50
   3   4  -2   82.69    5.90
   4  -3  -2   67.39    6.60
  -4   3   2   64.89    5.60
   4  -3   2   70.79    5.10
  -3  -4   2   68.89    5.90
  -4  -4  -2   44.90    4.50
   4   4  -2   49.20    5.00
   4   4  -2   44.10    4.70
  -4  -4  -2   52.49    7.40
   4  -4  -2   57.19    5.10
  -4  -4  -2   49.00    4.50
  -4  -4   2   63.79    5.50
  -4   4   2   37.90    4.40
   4  -4   2   41.60    3.90
   4  -4   2   43.40    3.80
   4   4   2   44.70    4.50
  -5  -4  -2  141.69   13.30
  -5  -4  -2  160.68   10.20
   5   4  -2  160.98   10.10
   5   4  -2  180.28   11.00
  -4   5  -2  154.58    9.50
   4  -5  -2  170.18   10.40
   4  -5  -2  170.58   11.70
   4  -5   2  162.88    9.50
  -5  -4   2  163.18   10.90
   5   4   2  154.08   10.20
   4  -5   2  151.88    8.90
  -4   5   2  169.98   10.20
   5   3  -2  194.68   12.30
  -5  -3  -2  188.48   11.50
   3  -5  -2  195.28   11.70
  -3   5  -2  191.38   11.20
   3  -5  -2  190.68   13.10
   3  -5   2  196.68   10.50
  -3   5   2  204.38   11.80
  -5  -3   2  197.98   12.30
   3  -5   2  192.78   11.20
   5   3   2  202.18   11.70
   5   2  -2   86.39    6.60
  -5  -2  -2   76.19    5.60
   2  -5  -2   97.59    6.30
   5   2  -2   78.89    6.70
   2  -5  -2  106.89    8.60
   2  -5   2   82.49    5.90
  -2   5   2   80.29    6.00
   5   2   2   75.59    5.80
   5   2   2   80.09    6.50
  -5  -2   2   81.09    6.60
   5   1  -2  309.37   16.60
   5   1  -2  292.67   16.20
   1  -5  -2  267.67   17.50
   1  -5  -2  273.67   15.60
  -5  -1   2  290.27   16.30
  -1   5   2  269.17   15.70
   5   1   2  285.47   15.50
   1  -5   2  267.57   15.50
   5   1   2  276.07   16.00
   5   0  -2   14.00    3.10
   0  -5  -2   15.20    2.40
   5   0  -2   13.90    3.20
   0  -5  -2   19.00    4.80
   5   0   2   16.30    2.90
   0   5   2   14.70    2.80
  -5   0   2   14.00    2.80
  -1  -5  -2  237.58   15.40
   5  -1  -2  218.08   13.60
   5  -1  -2  210.98   13.30
  -1  -5  -2  229.58   12.80
  -1  -5   2  243.38   13.60
   1   5   2  235.58   13.20
  -5   1   2  220.68   13.30
   5  -1   2  208.88   12.90
   5  -2  -2  373.46   21.10
  -2  -5  -2  346.47   20.50
  -2  -5  -2  364.76   22.40
   2   5  -2  428.16   19.80
   2   5  -2  439.16   20.90
   5  -2  -2  381.86   21.00
  -2  -5  -2  361.26   20.20
  -2  -5   2  348.17   20.70
  -5   2   2  381.26   20.70
   5  -2   2  366.96   20.10
   2   5   2  345.67   20.60
   5  -2   2  361.56   19.90
   5  -3  -2  103.29    8.90
   5  -3  -2  109.19    8.20
   3   5  -2  130.29    7.40
   3   5  -2  103.09    8.00
   5  -3   2  111.79    7.40
  -3  -5   2  111.39    8.60
  -5   3   2  140.59    8.30
   5  -4  -2   12.50    3.60
  -5   4  -2   15.30    2.30
   4   5  -2   16.60    2.70
  -4  -5  -2   15.30    2.90
   5  -4  -2   11.30    3.00
   4   5  -2   15.70    3.00
  -4  -5  -2   15.00    4.90
  -4  -5  -2   13.20    2.80
   5  -4   2   17.10    2.30
  -5   4   2   13.10    2.90
   5  -4   2   13.80    2.20
  -4  -5   2   13.70    3.00
   4   5   2   10.50    2.40
  -5  -5  -2  101.39    7.80
  -5  -5  -2  143.59   12.50
  -5  -5  -2  113.89    7.70
   5  -5  -2  103.39    7.80
   5   5  -2   99.79    8.00
   5  -5  -2   92.49    8.90
  -5   5  -2   93.99    6.80
  -5   5   2  109.19    7.70
   5   5   2  104.09    7.60
   5  -5   2   82.59    6.20
   5  -5   2  100.49    6.80
   6   5  -2   19.70    3.60
  -5   6  -2   23.20    3.30
  -6  -5  -2   24.00    3.70
   6   5  -2   27.50    4.40
   5  -6  -2   30.20    4.50
   5  -6  -2   17.70    4.90
   5  -6   2   21.00    2.60
   6   5   2   24.80    3.80
   5  -6   2   24.20    3.50
   6   5   2   24.60    4.20
  -5   6   2   23.50    3.80
  -6  -5   2   26.30    4.60
   6   4  -2   54.29    6.10
  -6  -4  -2   53.19    5.40
   6   4  -2   69.19    5.60
   4  -6  -2   54.59    5.50
  -4   6  -2   52.39    5.00
   4  -6   2   56.39    3.70
   4  -6   2   54.79    4.90
  -4   6   2   57.99    5.50
   6   4   2   55.19    6.00
   6   4   2   54.09    5.50
  -6  -4   2   60.09    6.20
   3  -6  -2  481.45   25.70
   6   3  -2  490.55   26.60
  -3   6  -2  452.45   25.20
   3  -6  -2  451.25   27.00
  -6  -3  -2  462.55   25.50
   6   3  -2  492.15   25.60
   3  -6   2  487.45   25.20
   6   3   2  484.25   25.80
  -6  -3   2  460.85   26.30
   3  -6   2  465.05   24.00
  -3   6   2  482.05   25.70
   6   3   2  469.65   25.90
   2  -6  -2  100.59   10.10
   6   2  -2  121.69    8.30
   2  -6  -2  123.39    8.00
   6   2  -2  119.79    8.80
  -6  -2  -2  119.29    7.60
  -2   6   2  118.99    8.00
  -6  -2   2  113.19    8.60
   2  -6   2  119.39    7.80
   6   2   2  112.89    8.40
   6   2   2  113.19    7.90
   6   1  -2  264.67   15.30
  -6  -1  -2  263.97   14.50
   6   1  -2  268.27   15.90
   1  -6  -2  246.78   16.80
   1  -6  -2  260.27   14.90
   6   1   2  255.37   14.80
   6   1   2  295.67   15.40
   1  -6   2  256.17   14.90
  -6  -1   2  251.77   15.50
  -1   6   2  255.57   15.10
   0  -6  -2  244.58   12.50
   6   0  -2  191.38   12.90
   6   0  -2  217.88   13.30
   6   0   2  202.88   12.10
  -6   0   2  214.48   13.00
   6   0   2  211.58   12.50
   0  -6   2  186.48   12.50
   0  -6   2  201.68   12.60
  -1  -6  -2    5.20    4.40
   6  -1  -2    2.30    2.20
   6  -1  -2    5.90    2.70
  -1  -6  -2    8.10    2.20
  -6   1   2    4.10    2.10
   6  -1   2    5.20    1.90
   1   6   2    6.50    2.30
  -1  -6   2    6.80    2.80
   6  -1   2    5.70    2.30
   6  -2  -2   34.50    4.80
   6  -2  -2   36.90    5.20
  -2  -6  -2   50.29    4.50
   6  -2   2   40.80    4.00
  -6   2   2   32.80    4.40
   6  -2   2   37.40    4.30
  -3  -6  -2  121.79    8.20
   6  -3  -2  110.29    8.80
   6  -3  -2  123.59    9.40
   3   6  -2  126.39    7.40
  -3  -6  -2  112.89   11.10
  -3  -6  -2  107.69    8.80
  -6   3  -2  119.19    7.30
   6  -3   2  115.99    7.80
  -6   3   2  119.29    8.50
  -3  -6   2  129.89    9.00
   6  -3   2  122.29    7.80
  -4  -6  -2  201.78   13.50
   4   6  -2  235.88   12.50
  -4  -6  -2  210.98   16.20
   6  -4  -2  236.38   14.00
  -4  -6  -2  220.48   13.50
  -6   4  -2  218.18   12.50
   4   6  -2  227.18   13.80
   6  -4  -2  201.98   14.10
  -4  -6   2  215.68   14.10
  -6   4   2  225.68   13.50
   6  -4   2  231.38   12.80
   6  -4   2  211.98   12.40
  -5  -6  -2  270.77   16.00
  -5  -6  -2  267.77   15.70
   5   6  -2  260.87   14.60
   6  -5  -2  271.87   16.00
  -6   5  -2  257.57   14.70
  -5  -6  -2  266.27   18.70
   6  -5  -2  280.67   16.70
   5   6  -2  252.87   15.90
   6  -5   2  257.97   14.80
   5   6   2  241.58   15.30
   6  -5   2  242.28   14.10
  -6   5   2  266.67   15.60
  -5  -6   2  255.07   16.40
   6  -6  -2   26.10    5.10
   6   6  -2   20.70    4.50
  -6  -6  -2   24.20    4.20
  -6  -6  -2   19.30    4.20
   6   6  -2   25.50    3.60
   6  -6  -2   43.10    5.50
  -6   6  -2   23.60    3.40
  -6  -6   2   20.00    4.50
   6   6   2   27.80    4.30
   6  -6   2   23.60    3.40
  -6   6   2   24.50    4.00
   6  -6   2   24.50    2.70
   6   6   2   20.20    4.30
  -7  -6  -2    7.50    2.70
   6  -7  -2    5.90    2.90
   7   6  -2    5.00    2.70
   6  -7  -2   -1.50    4.00
   7   6  -2    1.70    3.00
  -6   7  -2    6.30    2.60
   6  -7   2    2.80    2.30
  -7  -6   2    5.40    3.60
   7   6   2   10.70    3.80
   6  -7   2    1.60    1.80
   7   6   2   14.80    3.20
  -6   7   2    7.40    2.90
  -5   7  -2  736.83   40.40
   7   5  -2  791.02   42.00
   7   5  -2  780.52   40.30
   5  -7  -2  785.92   41.10
   5  -7  -2  857.61   42.50
  -7  -5  -2  735.03   41.10
   7   5   2  731.33   40.90
   5  -7   2  757.22   39.20
  -5   7   2  773.72   41.00
   7   5   2  743.43   41.10
   5  -7   2  780.92   40.40
  -7  -5   2  779.22   42.00
   4  -7  -2   79.09    7.10
   4  -7  -2   87.79    9.30
  -4   7  -2   77.79    6.70
  -7  -4  -2   78.59    6.80
   7   4  -2   94.19    8.20
  -4   7   2   81.69    7.00
   7   4   2   88.29    7.50
   4  -7   2   85.49    5.10
   7   4   2   79.99    7.00
  -7  -4   2   95.69    8.10
   4  -7   2   75.59    6.40
   3  -7  -2  827.62   43.00
   7   3  -2  875.91   42.80
   7   3  -2  848.62   44.00
   3  -7  -2  787.62   44.20
  -3   7  -2  792.72   42.70
  -7  -3  -2  806.02   42.90
  -3   7   2  787.72   42.90
   7   3   2  810.92   43.10
   7   3   2  799.72   43.00
  -7  -3   2  813.92   43.80
   3  -7   2  833.02   42.60
   2  -7  -2   18.80    4.80
   2  -7  -2   10.50    2.60
  -7  -2  -2   13.50    2.50
   7   2  -2    8.60    3.10
   7   2  -2    6.00    2.90
   7   2   2    4.50    2.40
  -2   7   2    6.70    2.30
   7   2   2    8.30    2.70
  -7  -2   2    7.40    2.80
   1  -7  -2   83.89    9.20
   7   1  -2   69.89    7.10
   7   1  -2   89.19    7.90
  -7  -1  -2   84.19    6.30
   1  -7  -2   88.99    6.70
   7   1   2   73.99    7.10
  -7  -1   2   87.29    7.30
   7   1   2   79.29    6.60
  -1   7   2   82.39    7.10
   1  -7   2  106.89    7.20
   0  -7  -2   -5.90    4.70
   0  -7  -2    4.50    2.30
   7   0  -2    5.20    2.70
  -7   0  -2    2.10    1.80
   7   0  -2    4.90    2.90
   7   0   2    4.00    2.40
   0   7   2    6.10    2.70
   0  -7   2   12.30    3.00
   7   0   2    2.90    2.10
   0  -7   2    9.30    2.60
  -7   0   2    4.00    2.40
  -1  -7  -2  548.65   30.20
   7  -1  -2  550.04   31.00
  -1  -7  -2  567.34   32.50
  -7   1  -2  555.74   29.50
   7  -1  -2  547.35   30.80
   7  -1   2  651.63   30.40
   1   7   2  533.15   30.60
  -1  -7   2  630.44   31.00
  -7   1   2  548.15   30.80
   7  -1   2  536.75   30.00
  -1  -7   2  549.85   30.50
  -2  -7  -2   65.79    5.90
  -7   2  -2   67.69    5.00
   7  -2  -2   64.49    6.40
  -2  -7  -2   65.19    8.50
   7  -2  -2   60.79    7.20
  -2  -7  -2   63.99    6.60
   2   7   2   62.99    6.60
   7  -2   2   65.29    5.60
  -2  -7   2   74.99    7.50
   7  -2   2   62.79    5.80
  -7   2   2   59.29    6.10
   7  -3  -2   -2.70    2.10
  -7   3  -2   -1.60    1.40
  -3  -7  -2    9.60    3.00
  -3  -7  -2    3.20    4.60
   7  -3  -2   -2.50    3.40
   7  -3   2    0.60    1.70
  -7   3   2   -1.20    1.90
   7  -3   2   -0.70    1.70
   4   7  -2   40.60    5.60
  -4  -7  -2   51.19    6.40
  -4  -7  -2   48.10    7.80
  -7   5  -2    5.60    2.20
   5   7  -2    4.60    2.30
   7  -5  -2    8.40    4.00
  -5  -7  -2   13.70    3.40
   7  -5  -2    7.40    3.30
   5   7  -2    6.90    3.10
  -7   5   2    5.70    2.70
   7  -5   2    7.10    2.00
   7  -5   2    7.70    2.60
  -5  -7   2    9.80    3.50
   7  -6  -2  275.27   17.00
  -6  -7  -2  272.47   17.20
  -7   6  -2  274.17   15.80
   7  -6  -2  257.47   17.50
  -7   6   2  290.07   16.70
   7  -6   2  267.87   14.90
   6   7   2  261.27   16.50
   6   7   2  262.97   16.70
   7  -6   2  275.97   16.00
   7   7  -2  187.08   13.10
   7  -7  -2  172.98   13.70
  -7   7  -2  183.18   11.80
   7  -7  -2  184.68   12.80
   7   7  -2  178.78   11.40
  -7  -7  -2  177.88   12.80
   7  -7   2  175.68   10.70
  -7   7   2  190.58   12.50
   7   7   2  181.88   12.60
   7  -7   2  189.38   11.90
   7   7   2  172.48   12.50
  -7  -7   2  191.28   13.70
  -8  -7  -2  179.48   13.00
   8   7  -2  192.38   12.00
  -7   8  -2  175.58   12.30
   7  -8  -2  177.48   13.10
   8   7  -2  176.08   15.50
   8   7   2  178.48   12.90
   8   7   2  166.28   13.00
   7  -8   2  204.48   11.10
  -8  -7   2  189.58   14.10
  -7   8   2  177.58   12.70
   7  -8   2  175.28   12.10
   8   6  -2   78.59    7.30
   6  -8  -2   83.79    7.90
   8   6  -2   83.09    8.40
  -8  -6  -2   81.09    7.70
   6  -8  -2   82.59   10.20
  -6   8  -2   74.29    7.30
   8   6   2   67.79    8.00
   8   6   2   73.29    7.50
  -6   8   2   78.69    7.60
  -8  -6   2   84.59    8.80
   6  -8   2   85.19    7.10
   6  -8   2   80.79    6.00
   5  -8  -2   65.39    6.70
  -8  -5  -2   69.79    6.80
  -5   8  -2   64.09    6.40
   8   5  -2   69.59    6.60
   8   5  -2   68.79    7.70
   5  -8   2   74.69    6.30
  -8  -5   2   59.29    7.50
  -5   8   2   76.79    6.80
   5  -8   2   63.79    4.90
   8   5   2   67.49    6.80
   8   5   2   53.59    7.00
   8   4  -2   58.39    7.30
   8   4  -2   74.39    6.70
  -4   8  -2   58.09    5.90
  -8  -4  -2   52.39    5.90
   4  -8  -2   50.49    6.20
   4  -8  -2   49.99    8.10
  -8  -4   2   68.39    7.70
   4  -8   2   64.09    4.40
   8   4   2   51.49    6.50
  -4   8   2   52.29    6.00
   4  -8   2   69.39    5.90
   8   4   2   54.39    6.10
   3  -8  -2  543.65   30.80
   3  -8  -2  535.35   28.80
  -8  -3  -2  509.05   28.70
   8   3  -2  542.75   28.60
  -3   8  -2  515.35   28.60
   8   3  -2  512.45   29.80
   3  -8   2  534.65   28.60
  -8  -3   2  536.15   29.90
  -3   8   2  520.15   29.00
   8   3   2  522.95   28.80
   8   3   2  515.35   29.00
   2  -8  -2  212.48   16.00
   8   2  -2  228.88   13.90
  -8  -2  -2  227.58   13.50
   8   2  -2  216.98   14.70
   2  -8  -2  226.48   13.80
  -8  -2   2  224.18   14.70
   2  -8   2  228.48   13.80
   8   2   2  222.58   13.90
   8   2   2  229.38   13.90
  -2   8   2  216.38   14.10
   8   1  -2  588.94   32.70
   1  -8  -2  601.34   31.60
   8   1  -2  606.84   31.80
   1  -8  -2  567.44   33.30
  -8  -1  -2  581.64   31.20
   1  -8   2  582.74   31.50
  -1   8   2  579.94   31.90
   8   1   2  598.24   31.80
   8   1   2  571.54   31.30
  -8  -1   2  577.84   32.30
   8   0  -2   77.89    7.70
   0  -8  -2   99.19   11.00
   8   0  -2   74.09    7.00
  -8   0  -2   61.89    5.50
   8   0   2   61.49    6.00
   0  -8   2   63.79    7.20
   0  -8   2   62.49    7.10
  -8   0   2   65.19    6.70
   8   0   2   66.39    6.50
  -8   1  -2   25.60    3.60
   8  -1  -2   28.80    4.90
   8  -1  -2   24.70    4.50
   8  -1   2   26.30    3.90
  -1  -8   2   30.80    5.60
  -1  -8   2   20.00    4.50
   8  -1   2   24.80    4.10
  -8   1   2   26.10    4.30
  -2  -8  -2    8.30    5.80
   8  -2  -2   19.80    4.20
  -8   2  -2   17.40    2.80
  -2  -8  -2   17.70    4.10
   8  -2  -2   24.90    4.80
   8  -2   2   22.60    3.70
   8  -2   2   19.00    3.20
   2   8   2   17.10    4.20
  -8   2   2   14.00    3.50
  -8   3  -2   85.39    6.30
   8  -3  -2   72.09    8.30
   8  -3  -2   74.49    7.90
  -3  -8  -2   88.89   10.50
  -3  -8  -2   77.79    8.40
  -3  -8  -2  102.39    7.90
  -8   3   2   87.59    7.50
   8  -3   2   79.39    6.40
   8  -3   2   81.19    7.00
  -8   4  -2  149.79   10.50
   8  -4  -2  161.68   12.10
   8  -4  -2  176.78   12.80
  -4  -8  -2  171.78   11.60
  -4  -8  -2  191.28   12.90
  -4  -8  -2  183.48   15.70
   4   8  -2  184.38    9.90
  -4  -8   2  168.08   12.20
  -8   4   2  169.08   11.60
   8  -4   2  159.48   11.10
   8  -4   2  155.58   10.10
  -5  -8  -2   -0.40    2.60
  -5  -8  -2   -7.50    6.10
  -8   5  -2   -1.10    1.90
   8  -5  -2   -2.20    2.30
   8  -5  -2    0.40    3.90
   5   8  -2    1.20    2.90
   5   8  -2   -2.00    1.80
  -5  -8   2    2.90    3.30
   8  -5   2   -0.50    1.70
  -8   5   2    0.70    2.50
   8  -5   2   -1.70    2.40
   6   8  -2   34.00    5.80
  -8   6  -2   28.70    4.10
   6   8  -2   21.00    3.60
   8  -6  -2   31.10    5.40
  -8   6   2   25.40    4.50
   8  -6   2   31.80    4.50
  -6  -8   2   31.20    6.10
   8  -6   2   29.70    3.60
  -8   7  -2   23.20    4.40
   8  -7  -2   29.00    5.30
   7   8  -2   27.80    4.00
   8  -7  -2   19.80    6.40
  -7  -8  -2   30.40    6.00
  -8   7   2   25.00    4.80
   8  -7   2   30.00    3.70
   8  -7   2   26.10    4.70
  -7  -8   2   28.40    5.70
   7   8   2   25.30    5.50
   7   8   2   24.70    5.00
  -8  -8  -2  196.78   14.50
  -8   8  -2  212.78   13.50
   8  -8  -2  196.08   15.60
   8   8  -2  192.58   12.80
   8  -8  -2  210.68   14.50
  -8  -8   2  224.18   15.60
   8  -8   2  216.58   12.50
   8  -8   2  224.08   13.70
   8   8   2  197.98   14.40
   8   8   2  193.98   14.10
  -8   8   2  199.88   14.00
   9   8  -2    9.00    3.40
  -9  -8  -2    9.10    4.60
   8  -9  -2    4.90    6.00
   8  -9  -2    6.20    5.60
   8  -9   2   10.20    3.10
  -8   9   2    5.90    3.80
   9   8   2    5.40    3.90
  -9  -8   2    4.10    4.00
   9   8   2    7.30    3.70
   8  -9   2    0.80    3.10
  -9  -7  -2  185.58   13.60
   9   7  -2  183.68   12.40
   7  -9  -2  195.98   13.50
   7  -9  -2  165.98   15.00
  -7   9  -2  189.48   12.80
   7  -9   2  183.78   12.50
   9   7   2  193.78   13.60
  -7   9   2  193.78   13.30
   7  -9   2  188.48   11.50
   9   7   2  201.88   13.70
  -9  -7   2  198.68   14.60
   6  -9  -2  265.27   18.40
   6  -9  -2  254.27   16.30
   9   6  -2  243.98   15.60
  -6   9  -2  252.57   15.90
  -9  -6  -2  242.78   16.20
   9   6  -2  259.67   17.80
   9   6   2  244.28   16.40
  -6   9   2  262.97   16.40
   9   6   2  250.37   16.20
   6  -9   2  267.57   15.70
   6  -9   2  237.68   14.40
  -9  -6   2  264.27   17.50
   9   5  -2  317.87   21.00
  -9  -5  -2  310.97   19.80
   5  -9  -2  371.56   20.20
   9   5  -2  390.86   19.80
  -5   9  -2  323.77   19.80
   9   5   2  306.37   19.70
   5  -9   2  317.47   19.30
   5  -9   2  302.57   17.80
  -9  -5   2  310.27   20.90
   9   5   2  318.57   20.00
  -5   9   2  393.96   20.40
   4  -9  -2  291.67   17.80
   4  -9  -2  294.57   19.70
   9   4  -2  301.37   19.00
   9   4  -2  309.57   17.40
  -9  -4  -2  290.47   17.80
  -4   9  -2  286.37   17.60
   9   4   2  279.77   17.50
  -4   9   2  281.97   17.80
   4  -9   2  286.07   17.30
  -9  -4   2  310.57   19.10
   9   4   2  285.97   18.00
   9   3  -2   51.89    6.10
  -9  -3  -2   47.90    5.50
   9   3  -2   37.60    5.90
   9   3   2   45.20    5.80
   9   3   2   47.60    5.90
   3  -9   2   42.70    5.60
  -9  -3   2   47.70    6.80
   9   2  -2   11.80    3.30
   2  -9  -2   -1.10    4.30
  -9  -2  -2    2.30    2.10
   9   2  -2    7.20    3.70
   2  -9  -2   -0.30    2.20
  -2   9   2   -0.30    2.60
  -9  -2   2    1.70    2.80
   9   2   2   10.00    3.30
   9   2   2    3.50    2.60
   1  -9  -2  215.88   12.60
  -9  -1  -2  192.08   12.00
   9   1  -2  172.98   13.50
   9   1  -2  188.68   12.50
  -1   9   2  189.78   12.90
   9   1   2  198.18   12.40
  -9  -1   2  182.58   13.00
   9   1   2  185.18   12.50
   1  -9   2  172.88   12.50
   0  -9  -2  171.78   11.80
   9   0  -2  168.48   12.20
   9   0  -2  179.98   13.10
  -9   0  -2  186.68   11.30
   0  -9  -2  177.98   15.10
   0   9   2  174.48   12.60
   9   0   2  177.58   11.80
   0  -9   2  179.68   12.60
   9   0   2  159.68   11.40
   0  -9   2  180.98   12.20
  -9   0   2  182.98   12.40
   9  -1  -2  574.54   32.70
  -1  -9  -2  582.54   34.10
   9  -1  -2  569.94   32.00
  -9   1  -2  566.24   30.90
  -1  -9  -2  597.04   31.80
   9  -1   2  563.34   31.10
  -9   1   2  585.94   32.30
  -1  -9   2  600.44   32.60
   9  -1   2  570.04   31.70
   1   9   2  582.24   32.50
  -1  -9   2  602.14   32.30
  -2  -9  -2   71.29    6.80
  -2  -9  -2   59.39    8.80
  -2  -9  -2   65.09    7.80
   9  -2  -2   45.50    6.40
  -9   2  -2   54.89    5.40
   9  -2  -2   55.19    6.90
  -2  -9   2   77.29    7.80
   9  -2   2   49.90    5.80
   9  -2   2   58.79    6.40
  -2  -9   2   78.09   10.00
   9  -3  -2   47.30    6.50
  -3  -9  -2   54.89    7.40
  -9   3  -2   40.80    4.80
   9  -3  -2   48.10    6.70
  -3  -9  -2   53.89    7.10
  -3  -9  -2   47.80    8.40
  -9   3   2   41.50    5.80
   9  -3   2   47.00    5.10
  -3  -9   2   60.29    7.70
   9  -3   2   42.70    5.80
  -4  -9  -2   30.70    7.80
  -4  -9  -2   26.30    5.90
   9  -4  -2   30.40    5.60
  -9   4  -2   25.30    3.80
   9  -4  -2   25.00    5.40
   9  -4   2   20.20    4.00
  -9   4   2   24.70    4.40
   9  -4   2   21.70    3.40
  -4  -9   2   22.60    5.00
  -5  -9  -2  471.55   28.10
   9  -5  -2  478.35   28.20
   5   9  -2  421.26   25.30
  -5  -9  -2  508.75   30.90
  -9   5  -2  490.65   26.40
   9  -5  -2  460.75   28.30
  -9   5   2  479.05   27.40
   9  -5   2  528.15   25.90
   9  -5   2  507.45   27.20
  -5  -9   2  493.95   28.60
  -9   6  -2   43.00    5.80
   9  -6  -2   82.39   10.60
   9  -6  -2   62.69    7.90
  -6  -9  -2   61.99    8.00
   9  -6   2   53.29    7.00
  -9   6   2   54.09    6.80
   9  -6   2   56.89    5.50
  -9   7  -2   91.39    7.80
  -7  -9  -2  105.29   10.30
   9  -7  -2  106.69    9.70
   9  -7  -2  133.99   11.70
   7   9  -2   76.69    7.40
  -9   7   2  110.69    9.10
   9  -7   2   79.69    8.40
  -7  -9   2   93.09   10.60
   7   9   2   88.79    9.40
   9  -7   2   93.29    7.30
   9  -8  -2  301.47   21.00
   9  -8  -2  286.77   20.10
   8   9  -2  283.77   17.60
  -8  -9  -2  347.27   21.30
  -8  -9   2  279.87   20.50
   8   9   2  361.16   19.90
   9  -8   2  312.87   17.60
  -9   8   2  327.17   19.50
   8   9   2  291.27   19.30
   9  -8   2  294.97   18.70
   9   9  -2   -0.10    3.00
   9  -9  -2   10.30    5.40
   9   9   2    2.00    3.90
  -9  -9   2    1.60    3.80
   9  -9   2   -0.20    2.80
  -9   9   2   -0.60    2.90
   9 -10  -2    3.60    5.40
  10   9  -2   12.60    3.50
  10   9   2   13.60    4.80
   9 -10   2    4.60    3.00
  -9  10   2    1.10    3.20
 -10  -9   2    5.90    4.10
   8 -10  -2  158.98   14.50
  10   8  -2  132.79   10.90
  -8  10   2  150.08   11.70
  10   8   2  139.49   11.90
 -10  -8   2  149.49   13.10
   8 -10   2  163.78   10.40
   7 -10  -2    9.60    6.10
  10   7  -2   -3.20    3.10
  -7  10   2    5.10    3.50
 -10  -7   2   -2.40    3.40
   7 -10   2   -1.70    2.80
  10   7   2    2.70    4.00
  10   7   2    0.30    3.10
   7 -10   2   -0.70    2.60
  -6  10  -2   46.70    6.40
 -10  -6  -2   39.50    6.00
   6 -10  -2   44.30    9.30
  10   6  -2   37.30    6.00
   6 -10  -2   42.50    7.80
 -10  -6   2   48.20    7.40
   6 -10   2   48.30    6.00
   6 -10   2   40.40    5.30
  10   6   2   50.29    6.40
  -6  10   2   50.99    6.70
  10   6   2   43.80    6.40
  10   5  -2   24.00    4.70
  10   5  -2   29.60    6.50
  -5  10  -2   26.40    5.00
   5 -10  -2   24.10    4.60
 -10  -5  -2   20.70    4.50
   5 -10  -2   31.10    7.20
  10   5   2   20.40    4.70
  10   5   2   25.50    5.20
 -10  -5   2   29.40    6.10
   5 -10   2   25.30    4.40
  -5  10   2   30.50    5.50
  10   4  -2  147.99   11.50
  10   4  -2  165.18   13.00
   4 -10  -2  160.48   11.70
  -4  10  -2  159.68   11.60
   4 -10  -2  164.98   15.10
 -10  -4  -2  161.08   11.60
   4 -10   2  163.38   11.30
  -4  10   2  168.08   12.30
  10   4   2  158.98   11.90
  10   4   2  167.78   12.20
 -10  -4   2  162.48   13.40
  10   3  -2   27.70    4.90
  10   3  -2   24.10    5.40
   3 -10  -2   37.80    5.40
 -10  -3  -2   29.70    4.70
   3 -10   2   37.80    5.60
 -10  -3   2   27.50    5.70
  10   3   2   34.50    5.40
  10   3   2   30.80    5.00
   2 -10  -2  489.05   29.20
  10   2  -2  559.24   28.80
 -10  -2  -2  468.25   26.60
  10   2  -2  481.55   26.90
   2 -10  -2  468.05   26.90
  10   2   2  455.25   27.10
  10   2   2  449.95   26.40
  -2  10   2  444.96   27.20
 -10  -2   2  494.05   28.00
   2 -10   2  473.75   26.80
   1 -10  -2   15.30    3.60
  10   1  -2    9.10    3.90
 -10  -1  -2    8.90    3.00
  10   1  -2    9.70    4.30
  10   1   2   11.30    3.60
 -10  -1   2   11.70    4.10
   1 -10   2    9.70    3.70
  10   1   2   14.20    3.90
  10   0  -2   51.89    6.50
  10   0  -2   56.89    7.80
 -10   0  -2   45.30    5.60
   0 -10   2   53.29    7.30
  10   0   2   51.19    6.40
   0 -10   2   56.89    7.10
 -10   0   2   53.19    6.90
  10   0   2   44.60    6.20
  10  -1  -2   79.99    9.10
 -10   1  -2   99.09    7.50
  10  -1  -2  104.39   10.10
  10  -1   2   87.39    7.70
 -10   1   2   88.59    8.80
  10  -1   2   95.89    8.50
  10  -2  -2  142.99   11.70
  -2 -10  -2  141.39   12.10
  -2 -10  -2  125.09   14.70
 -10   2  -2  146.79    9.80
  10  -2  -2  109.89   11.40
  10  -2   2  157.58   11.00
  -2 -10   2  159.88   12.50
 -10   2   2  135.29   11.10
  10  -2   2  145.29   10.00
  -2 -10   2  177.08   14.20
  -3 -10  -2  528.75   31.20
  10  -3  -2  548.45   31.50
  -3 -10  -2  551.34   33.70
  10  -3  -2  539.25   31.30
 -10   3  -2  541.45   29.40
  10  -3   2  545.65   29.20
  -3 -10   2  508.75   31.00
 -10   3   2  542.25   30.70
  10  -3   2  563.94   30.50
  -3 -10   2  565.34   32.10
  10  -4  -2   58.79    7.80
  -4 -10  -2   93.79   10.70
  10  -4  -2   66.99    8.60
  -4 -10  -2   56.69   10.60
 -10   4  -2   50.79    5.90
 -10   4   2   57.69    7.20
  10  -4   2   59.99    6.10
  -4 -10   2   72.69    9.50
  10  -4   2   53.99    7.20
  -5 -10  -2   42.60    6.60
  10  -5  -2   40.90    6.80
 -10   5  -2   37.50    5.20
  -5 -10  -2   38.10    9.70
  10  -5  -2   29.00    5.70
   5  10  -2   22.40    3.30
  10  -5   2   38.10    5.00
 -10   5   2   33.70    5.30
  10  -5   2   32.60    5.20
  -5 -10   2   32.90    6.30
  10  -6  -2   41.50    7.50
  -6 -10  -2   41.50    6.90
 -10   6  -2   35.50    5.00
  10  -6  -2   32.70    6.00
  -6 -10   2   47.00    7.30
  10  -6   2   31.70    5.40
 -10   6   2   32.10    5.80
  10  -6   2   33.10    4.30
  10  -7  -2  241.08   17.30
  10  -7  -2  232.78   17.90
   7  10  -2  209.38   13.90
  -7 -10   2  242.18   17.80
 -10   7   2  242.38   16.10
  10  -7   2  220.38   14.20
  10  -7   2  245.18   16.00
   7  10   2  294.17   16.80
  10  -8  -2    2.00    5.00
   8  10  -2   -1.80    2.70
 -10   8   2   -0.90    2.80
   8  10   2   -1.20    4.00
  10  -8   2   -3.30    2.50
  -8 -10   2    7.50    4.20
   9  10  -2  145.49   11.00
  10  -9  -2  170.38   14.80
   9  10   2  181.18   13.30
  -9 -10   2  170.08   14.30
 -10   9   2  167.88   12.70
  10  -9   2  163.48   11.20
  10  10  -2   13.50    3.70
  10 -10  -2    5.50    5.50
 -10  10   2    4.00    3.70
  10 -10   2    4.20    3.40
  10  10   2    8.90    4.80
 -10 -10   2    7.90    4.70
  11  10  -2    3.00    3.60
  10 -11  -2    6.90    6.20
  11  10   2    6.50    4.50
 -11 -10   2   11.30    5.00
 -10  11   2   10.40    4.30
  10 -11   2   10.90    3.90
   9 -11  -2   -5.60    5.00
  11   9  -2    3.70    3.40
  -9  11   2   -1.30    3.20
   9 -11   2    1.60    3.10
 -11  -9   2    3.80    3.80
  11   9   2    4.00    3.90
  11   8  -2    0.20    3.40
   8 -11  -2    7.80    6.00
  11   8   2    4.40    3.80
  -8  11   2    0.60    3.20
   8 -11   2    3.60    3.10
 -11  -8   2    3.60    4.10
   7 -11  -2   62.59   10.00
  11   7  -2   92.49    8.50
  -7  11   2   73.59    8.60
 -11  -7   2   89.49   10.10
  11   7   2   90.09    9.20
   7 -11   2   76.49    7.10
   6 -11  -2  282.57   21.50
  11   6  -2  294.27   18.60
  11   6   2  289.77   19.00
 -11  -6   2  324.57   20.90
  -6  11   2  312.87   19.50
   6 -11   2  303.07   17.20
  11   5  -2  144.59   10.70
   5 -11  -2  106.09   13.00
   5 -11   2  112.29    9.90
 -11  -5   2  132.49   12.50
  11   5   2  126.99   11.00
  11   5   2  131.79   11.10
  -5  11   2  115.99   10.90
  11   4  -2  337.37   19.90
  -4  11  -2  327.77   20.20
 -11  -4  -2  325.07   20.20
   4 -11  -2  323.17   22.40
  11   4   2  333.67   20.70
  -4  11   2  327.87   20.70
 -11  -4   2  336.97   21.70
  11   4   2  333.97   20.00
   4 -11   2  324.07   19.80
  11   3  -2  176.08   13.00
  11   3  -2  186.28   14.20
 -11  -3  -2  181.48   12.80
   3 -11  -2  199.08   15.90
  11   3   2  179.28   13.40
  -3  11   2  188.68   13.70
   3 -11   2  184.98   13.10
  11   3   2  190.38   12.90
 -11  -3   2  177.98   13.80
  11   2  -2   54.19    7.70
  11   2  -2   61.69    8.30
   2 -11  -2   62.39    9.40
 -11  -2  -2   61.69    6.80
 -11  -2   2   61.19    7.90
  -2  11   2   64.89    8.40
 -11  -1  -2   12.60    3.20
  11   1  -2   15.40    4.90
   1 -11  -2   -4.60    6.40
  11   1  -2   11.00    4.20
  11   1   2   14.20    3.90
   1 -11   2   13.80    4.10
 -11  -1   2    6.60    3.70
  -1  11   2   11.60    4.40
  11   1   2   12.10    3.50
 -11   0  -2  439.86   24.90
   0 -11  -2  452.85   28.50
  11   0  -2  405.66   25.60
  11   0  -2  429.76   26.80
   0 -11   2  499.45   26.00
   0  11   2  451.65   26.50
  11   0   2  420.76   24.70
 -11   0   2  448.96   26.40
   0 -11   2  462.55   26.30
  11   0   2  423.16   25.60
  11  -1  -2   20.60    5.30
  -1 -11  -2   24.70    6.20
  -1 -11  -2   10.60    6.90
  11  -1  -2    9.80    4.80
 -11   1  -2   16.30    3.30
  -1 -11   2   35.50    7.00
 -11   1   2   18.70    4.70
   1  11   2   27.70    5.60
  -1 -11   2   24.70    5.10
  11  -1   2   18.20    4.30
  11  -1   2   17.00    3.90
  11  -2  -2   28.70    5.70
  -2 -11  -2   39.40    6.70
  -2 -11  -2   33.90    8.50
 -11   2  -2   41.10    5.10
  11  -2  -2   26.30    5.90
  11  -2   2   32.70    4.50
 -11   2   2   30.90    5.40
  -2 -11   2   48.30    8.80
  11  -2   2   37.00    5.60
  -2 -11   2   39.80    7.00
  11  -4  -2   89.89   11.10
  -4 -11  -2  108.49   12.70
  11  -4  -2  104.69   10.60
  -4 -11  -2  108.59   13.30
 -11   4  -2  109.39    8.60
  11  -4   2  120.59    8.70
  -4 -11   2  133.59   11.70
 -11   4   2  110.69   10.00
  11  -4   2  111.09   10.00
  11  -5  -2  368.06   23.40
  11  -5  -2  358.66   23.40
  -5 -11  -2  355.66   23.90
  11  -5   2  380.36   20.70
  11  -5   2  358.56   22.40
 -11   5   2  382.76   22.50
  -5 -11   2  363.76   23.70
  11  -6  -2  135.89   12.60
  11  -6  -2  104.49   13.10
  11  -6   2   95.39   10.10
  -6 -11   2  138.99   12.80
 -11   6   2  104.89   10.00
  11  -6   2  112.09    8.50
   6  11   2   92.59   10.50
  11  -7  -2  263.27   19.20
 -11   7   2  276.77   17.60
   7  11   2  250.97   17.60
  11  -7   2  255.07   15.70
  -7 -11   2  282.67   19.40
  11  -8  -2   40.50    7.30
   8  11   2   18.20    5.40
  -8 -11   2    4.20    4.50
   9  11  -2   32.60    4.60
  11  -9  -2   22.60    7.10
  -9 -11   2   36.20    7.20
   9  11   2   35.70    6.50
 -11   9   2   30.20    5.90
  11  -9   2   39.70    5.20
  11 -10  -2    8.40    6.00
  10  11  -2    8.50    3.60
 -10 -11   2   10.60    5.10
  11 -10   2   10.70    3.80
  10  11   2   14.80    5.30
 -11  10   2    8.60    3.90
  11  11  -2  169.58   11.60
  11 -11  -2  132.69   15.00
  11  11   2  156.88   13.00
 -11 -11   2  161.88   14.50
  11 -11   2  127.89   11.70
  11 -12  -2   36.90    8.60
  12  11  -2   28.70    5.50
  11 -12   2   30.00    5.60
  12  11   2   30.00    6.30
 -12 -11   2   30.70    7.40
  12  10  -2   25.10    5.10
  10 -12  -2   31.40    8.20
  10 -12   2   27.40    5.30
 -12 -10   2   22.50    6.10
   9 -12  -2  140.59   15.30
  12   9  -2  151.78   12.00
  -9  12   2  164.08   13.10
  12   9   2  163.48   12.90
 -12  -9   2  158.88   14.10
   8 -12  -2   -1.00    5.50
  12   8  -2    1.40    3.70
  12   8   2   -2.20    3.70
 -12  -8   2   -1.20    3.60
   8 -12   2    0.00    4.30
  -8  12   2   -3.20    3.10
  12   7  -2   25.80    5.10
   7 -12  -2   18.60    7.20
  12   7   2   23.40    5.30
  -7  12   2   23.90    5.20
 -12  -7   2   19.20    5.70
   6 -12  -2   12.30    6.90
  12   6  -2   18.90    4.80
 -12  -6   2   19.50    5.90
  -6  12   2   19.10    5.20
  12   6   2   19.70    5.00
  12   5  -2   46.50    6.50
   5 -12  -2   44.00    8.50
 -12  -5   2   47.20    7.60
  -5  12   2   38.40    6.40
  12   5   2   38.30    6.40
   4 -12  -2   -4.50    5.00
  12   4  -2   -0.20    3.60
 -12  -4   2   -1.20    3.40
  -4  12   2   -2.50    3.10
  12   4   2   -5.80    3.50
   3 -12  -2   90.59   11.00
  12   3  -2   82.69    9.40
  -3  12   2   88.99    9.60
 -12  -3   2   88.59    9.90
   3 -12   2   95.19   10.10
  12   3   2   85.29    8.80
  12   3   2   85.29    9.20
  12   2  -2   11.20    5.40
 -12  -2   2   24.70    5.70
   2 -12   2   32.00    5.70
  -2  12   2   28.30    6.00
  12   2   2   28.80    4.80
  12   2   2   29.70    5.80
   1 -12  -2  194.68   17.20
  12   1  -2  205.78   16.70
  12   1  -2  186.08   13.90
  12   1   2  199.28   14.20
   1 -12   2  201.78   14.00
 -12  -1   2  209.08   14.90
  -1  12   2  187.78   15.40
  12   1   2  202.18   13.10
   1 -12   2  178.48   14.30
  12   0  -2   44.90    7.50
  12   0  -2   54.89    7.40
   0 -12  -2  100.69   13.40
 -12   0   2   51.49    7.30
   0 -12   2   49.50    7.40
   0 -12   2   43.40    6.90
  12   0   2   60.89    7.80
  12   0   2   68.09    7.00
  12  -1  -2   83.19   10.10
  12  -1  -2   69.59    8.70
  -1 -12  -2   67.29   11.20
  -1 -12   2   84.99    9.70
   1  12   2   81.79   10.30
  12  -1   2   71.79    7.40
  12  -1   2   78.19    8.40
 -12   1   2   57.49    8.50
  12  -2  -2  366.16   24.00
  12  -2  -2  366.56   25.00
  -2 -12  -2  363.26   27.00
  -2 -12  -2  413.66   25.20
  12  -2   2  382.16   22.40
  -2 -12   2  458.55   25.20
 -12   2   2  381.56   24.10
  12  -2   2  378.96   23.90
  -2 -12   2  480.65   26.60
  12  -3  -2    0.80    4.50
  12  -3  -2    0.40    4.00
  -3 -12  -2    7.80    5.20
  -3 -12   2   -0.80    5.60
  12  -3   2    4.20    3.10
  -3 -12   2   13.40    6.30
 -12   3   2    0.10    3.20
  12  -3   2   -1.40    3.20
  12  -4  -2   76.79   10.10
  -4 -12  -2   79.39   12.70
 -12   4   2   61.79    8.40
  12  -4   2   69.69   12.70
  12  -4   2   76.99    7.30
  -4 -12   2  110.19   11.90
  -5 -12  -2   -2.00    8.00
  12  -5  -2   -4.80    5.00
 -12   5   2   -2.80    2.70
  -5 -12   2    3.00    4.20
  12  -5   2    2.80    2.90
  12  -6  -2  122.99   12.60
 -12   6   2  128.39   10.90
   6  12   2  139.89   11.60
  12  -6   2  123.49    9.50
  -6 -12   2  113.29   12.40
  12  -7  -2   46.10    8.50
  -7 -12   2   64.79   10.40
   7  12   2   58.79    7.80
 -12   7   2   41.30    6.50
  12  -7   2   67.69    6.80
  12  -8  -2  181.88   15.90
  -8 -12   2  175.78   15.40
   8  12   2  186.38   14.00
 -12   8   2  161.78   13.10
  12  -8   2  169.18   12.00
  12  -9  -2   75.79   10.50
   9  12   2   83.99    9.60
 -12   9   2   74.29    9.50
  12  -9   2   62.69    7.90
  -9 -12   2   81.69   10.60
  12 -10  -2    0.70    6.10
  10  12   2   11.00    5.20
 -10 -12   2    4.30    5.10
  12 -10   2    7.90    3.80
  12 -11  -2   -2.30    6.10
 -11 -12   2    6.50    5.10
  11  12   2    9.90    5.40
  12 -11   2    2.60    4.30
  12 -12  -2   -3.90    6.30
  12  12   2    0.70    4.50
  12 -12   2    1.60    4.00
  12 -13  -2   51.59   10.70
  13  12   2   78.79   10.50
  11 -13  -2    9.30    7.10
  13  11  -2    4.70    4.50
  13  11   2    6.70    5.40
  10 -13  -2   -4.60    6.10
  13  10  -2    2.00    3.80
  13  10   2    0.70    4.70
   9 -13  -2   -4.40    6.30
  13   9  -2   12.00    4.50
  13   9   2    0.40    4.60
 -13  -9   2    6.40    4.50
   8 -13  -2   -1.80    6.10
  13   8  -2    5.30    4.10
  -8  13   2    6.70    4.30
 -13  -8   2    3.70    4.30
  13   8   2    9.30    4.70
   7 -13  -2  218.48   18.70
  13   7  -2  233.78   15.80
 -13  -7   2  236.08   18.00
  13   7   2  234.48   16.20
  -7  13   2  225.08   16.70
   6 -13  -2   -5.70    5.90
  13   6  -2   17.10    4.70
  -6  13   2    5.40    4.10
 -13  -6   2    6.30    4.80
  13   6   2    7.90    4.40
  13   5  -2  199.48   14.10
   5 -13  -2  158.98   16.40
  13   5   2  199.68   14.00
  -5  13   2  198.08   14.90
 -13  -5   2  207.38   15.60
   4 -13  -2    2.10    5.70
  13   4  -2   10.10    4.30
  -4  13   2    5.10    3.70
 -13  -4   2    0.20    3.60
  13   4   2    1.10    3.30
   3 -13  -2   -7.70    5.00
  13   3  -2   -0.70    4.00
  -3  13   2   -1.20    3.70
 -13  -3   2   -1.20    3.10
  13   3   2   -4.00    3.20
   2 -13  -2   -2.00    5.50
  13   2  -2    2.20    3.80
  -2  13   2   -1.20    3.90
 -13  -2   2   -2.80    3.20
  13   2   2   -1.50    3.00
  13   1  -2  154.98   13.00
   1 -13  -2  179.58   16.40
 -13  -1   2  173.58   13.50
   1 -13   2  162.08   13.50
  13   1   2  158.68   11.90
  -1  13   2  158.88   14.10
  13   0  -2   90.59   10.50
   0 -13  -2  118.29   14.40
 -13   0   2  108.69   10.60
   0  13   2  121.19   12.00
  13   0   2  112.39    9.20
   0 -13   2  109.29   10.80
  13  -1  -2  137.19   12.30
  -1 -13  -2  154.98   15.90
  -1 -13   2  147.09   14.00
 -13   1   2  153.58   12.50
  13  -1   2  147.19   10.80
  13  -2  -2    5.00    4.50
  -2 -13  -2   39.10    9.00
  13  -2   2    7.30    3.40
 -13   2   2    5.30    4.00
  -2 -13   2    9.10    6.60
  -3 -13  -2   18.20    8.20
  13  -3  -2   20.60    5.80
 -13   3   2   24.00    5.10
  -3 -13   2   42.30    9.00
  13  -3   2   25.40    4.40
  13  -4  -2  224.58   17.10
  -4 -13  -2  254.47   20.20
 -13   4   2  221.88   15.90
  13  -4   2  225.68   14.40
  -4 -13   2  220.88   18.00
  -5 -13  -2   74.59   12.80
  13  -5  -2   74.09    9.80
  13  -5   2   71.69    7.50
  -5 -13   2   62.29    9.10
 -13   5   2   64.19    8.20
  13  -6  -2  289.77   21.10
  13  -6   2  307.47   18.40
   6  13   2  299.57   19.90
  -6 -13   2  331.47   22.00
 -13   6   2  304.47   19.90
  13  -7  -2    9.40    6.00
   7  13   2    9.80    4.80
  13  -7   2    6.50    3.30
 -13   7   2    2.30    3.40
  -7 -13   2    8.60    6.20
  13  -8  -2   -4.90    5.30
   8  13   2    6.50    4.90
  -8 -13   2    3.20    4.50
  13  -8   2    1.00    3.30
  13  -9  -2   32.30    8.50
  -9 -13   2   24.70    6.80
  13  -9   2   39.40    5.70
  13 -10  -2  108.09   14.60
  13 -10   2  122.19   10.90
  10  13   2  141.79   12.60
 -10 -13   2  110.69   13.30
  13 -11  -2   15.20    7.50
  13 -11   2   27.90    5.80
  11  13   2   22.40    6.30
  13 -12  -2    7.40    7.20
  13 -12   2   10.90    5.10
  12  13   2   10.40    5.30
  13 -13  -2    0.70    7.50
  13  13   2   15.00    5.90
  13 -14  -2   14.80    8.70
  14  13   2   29.40    7.30
  12 -14  -2  -11.00    6.80
  14  12   2   -1.40    5.10
  11 -14  -2    3.40    7.10
  14  11  -2    1.80    4.50
  14  11   2   -1.50    5.00
  14  10  -2   57.99    7.70
  10 -14  -2   65.59   11.60
  14  10   2   63.59    8.90
  14   9  -2    3.50    4.30
   9 -14  -2   -9.40    6.30
  14   9   2    0.60    4.80
  14   8  -2   18.30    5.40
   8 -14  -2   15.20    7.60
  14   8   2   30.10    6.10
   7 -14  -2   -5.30    5.70
  14   7  -2    3.60    4.20
 -14  -7   2   -0.60    4.40
  -7  14   2    2.30    6.70
  14   7   2    0.50    4.00
   6 -14  -2    3.10    6.30
  14   6  -2   32.20    5.80
  -6  14   2   17.70    5.80
  14   6   2   19.10    5.10
 -14  -6   2   11.70    4.90
  14   5  -2   53.39    7.30
   5 -14  -2   46.90    8.90
 -14  -5   2   54.49    8.30
  -5  14   2   48.30    7.80
  14   5   2   52.69    7.20
  14   4  -2   95.19   10.00
   4 -14  -2   91.09   11.70
  -4  14   2   99.49   10.90
  14   4   2   91.59    9.40
 -14  -4   2   85.79   10.30
  14   3  -2  127.69   11.60
   3 -14  -2  106.09   13.90
 -14  -3   2  130.69   12.30
  14   3   2  135.09   10.80
  -3  14   2  131.99   12.30
  14   2  -2   34.30    6.20
   2 -14  -2   27.10    7.90
  14   2   2   36.40    5.40
  -2  14   2   45.70    8.30
 -14  -2   2   22.70    5.90
   1 -14  -2    5.00    6.60
  14   1  -2    6.80    4.30
 -14  -1   2    2.60    3.90
  14   1   2    7.20    3.50
  -1  14   2    6.30    5.10
   1 -14   2    2.80    4.00
   0 -14  -2    0.10    6.20
  14   0  -2   -1.20    3.70
   0  14   2    2.50    4.10
   0 -14   2   -0.50    3.40
 -14   0   2   -4.80    2.90
  14   0   2   -2.60    2.80
  -1 -14  -2  116.49   13.70
  14  -1  -2  103.99   10.70
 -14   1   2   97.69   10.40
  14  -1   2  100.29    8.80
  -1 -14   2   98.19   12.50
  14  -2  -2    5.10    4.50
  -2 -14  -2    7.00    7.50
  -2 -14   2    7.10    6.80
  14  -2   2    4.90    3.10
 -14   2   2    3.60    3.70
  -3 -14  -2  136.09   16.30
 -14   3   2  153.28   12.30
  14  -3   2  133.89   10.60
  14  -4  -2   -7.30    5.20
  -4 -14   2    9.30    5.70
 -14   4   2   -1.20    3.30
  14  -4   2   -0.50    3.20
  14  -5  -2   14.10    6.00
  -5 -14  -2   12.50    8.50
  14  -5   2   -5.00    3.40
  -5 -14   2    1.30    4.30
 -14   5   2    1.90    3.50
  14  -6  -2   33.50    8.10
  14  -6   2   39.80    5.90
  -6 -14   2   40.10    8.00
   6  14   2   69.09    9.30
  14  -7  -2   49.10    9.30
   7  14   2   61.09    8.80
  14  -7   2   47.00    6.50
  -7 -14   2   44.50    9.50
  14  -8  -2   39.40    8.80
  14  -8   2   43.00    6.30
  -8 -14   2   37.70    8.10
   8  14   2   32.80    7.70
  14  -9  -2    7.70    6.90
   9  14   2    1.50    4.60
  -9 -14   2   10.60    6.00
  14  -9   2    6.20    4.00
  14 -10  -2    9.00    7.00
  10  14   2   16.50    6.30
  14 -10   2   20.70    5.30
  14 -11  -2   21.00    8.50
  14 -11   2   35.00    6.70
  11  14   2   28.90    6.90
  14 -12  -2   63.09   11.60
  14 -12   2   72.89   10.30
  12  14   2   77.49   10.50
  14 -13  -2   54.19   11.50
  13  14   2   62.19    9.50
  14 -14  -2   15.30    8.60
  14  14   2   18.00    7.20
  14 -15  -2    5.50    8.30
  15  14   2   -4.20    5.40
  13 -15  -2   31.10   10.20
  15  13   2   32.10    7.50
  12 -15  -2   25.60    9.50
  15  12   2   36.50    7.50
  11 -15  -2   40.40   10.30
  15  11  -2   41.30    7.50
  15  11   2   35.30    7.10
  10 -15  -2   12.70    7.90
  15  10  -2    3.90    4.80
  15  10   2    6.30    5.10
  15   9  -2    9.40    5.40
   9 -15  -2    5.50    7.70
  15   9   2   11.30    5.40
  15   8  -2  114.09   11.40
   8 -15  -2  112.49   15.30
  15   8   2  117.69   11.70
  15   7  -2   30.10    6.30
   7 -15  -2   21.60    8.30
  15   7   2   42.20    6.60
  15   6  -2   74.09    9.80
   6 -15  -2   67.49   10.90
  15   6   2   78.99    9.40
   5 -15  -2  -13.40    6.20
  15   5  -2    3.10    4.30
  15   5   2    2.10    3.90
  -5  15   2    2.20    4.60
  15   4  -2   -3.90    4.10
   4 -15  -2   -3.80    6.20
  15   4   2    7.80    4.00
  -4  15   2   -3.40    4.20
  15   3  -2    1.30    4.40
   3 -15  -2   -2.40    6.20
  -3  15   2    0.30    4.40
  15   3   2    1.10    3.30
 -15  -3   2    1.40    4.50
  15   2  -2   65.19    8.80
   2 -15  -2   75.29   11.70
 -15  -2   2   70.19   10.00
  15   2   2   66.09    8.00
  -2  15   2   75.29   11.10
   2 -15   2   64.39    9.60
   1 -15  -2   45.60    9.70
  15   1  -2   42.20    7.50
  -1  15   2   45.40    8.00
  15   1   2   44.60    6.40
 -15  -1   2   44.40    8.00
   1 -15   2   46.80    8.00
   0 -15  -2   -3.30    7.10
  15   0  -2   -2.90    4.20
 -15   0   2    3.80    4.20
  15   0   2    6.30    3.70
   0 -15   2    0.20    5.70
  15  -1  -2   34.90    6.90
  -1 -15   2   48.90    9.60
  15  -1   2   44.10    6.10
 -15   1   2   34.20    7.80
  15  -2  -2    4.10    5.00
  -2 -15  -2    4.90    7.60
  -2 -15   2   26.20    9.50
  15  -2   2    4.30    3.50
  15  -3  -2   92.29   11.80
  -3 -15  -2  112.09   15.20
  15  -3   2   96.09    9.30
  -3 -15   2  118.19   15.50
  -4 -15  -2   25.20    9.40
  15  -4  -2   22.20    6.80
  -4 -15   2   30.80    8.70
  15  -4   2   26.90    5.10
  15  -5  -2  478.55   29.60
  -5 -15   2  440.06   29.80
  15  -5   2  471.55   26.70
  15  -6  -2   41.90    8.40
   6  15   2   27.10    6.70
  -6 -15   2   24.80    6.70
  15  -6   2   26.80    5.50
  15  -7  -2   37.10    8.60
  -7 -15   2   35.80    8.20
   7  15   2   20.80    7.30
  15  -7   2   27.20    5.70
  15  -8  -2   -2.30    6.30
  -8 -15   2    2.10    5.10
   8  15   2    9.80    5.50
  15  -8   2    0.90    4.00
  15  -9  -2   96.69   13.30
  15  -9   2  127.49   11.20
   9  15   2  102.09   12.10
  15 -10  -2   52.99   11.00
  10  15   2   43.80    8.90
  15 -10   2   47.30    7.50
  15 -11  -2   11.10    8.10
  11  15   2   22.80    6.60
  15 -11   2   20.30    6.20
  15 -12  -2    9.70    8.30
  12  15   2   13.50    6.30
  15 -13  -2   -3.30    7.20
  13  15   2   -3.40    5.40
  15 -14  -2   21.80    9.50
  14  15   2   13.80    6.80
  15 -15  -2   -1.80    8.70
  15  15   2   -3.50    5.30
  15 -16  -2   43.30   12.10
  16  15   2   32.80    7.50
  14 -16  -2    1.20    8.30
  16  14   2    1.50    5.30
  13 -16  -2   -1.30    8.40
  16  13   2    2.10    4.70
  12 -16  -2   -2.40    7.60
  16  12   2    0.00    4.60
  16  11  -2   27.70    6.80
  11 -16  -2   23.40    9.60
  16  11   2   39.30    7.10
  16  10  -2    9.90    5.30
  10 -16  -2    0.30    7.10
  16  10   2   10.10    5.10
  16   9  -2   32.30    6.90
   9 -16  -2   35.70    9.80
  16   9   2   43.20    7.20
   8 -16  -2    8.80    8.10
  16   8  -2   16.20    5.70
  16   8   2   17.60    5.60
  16   7  -2    1.70    5.10
   7 -16  -2   -6.00    6.60
   6 -16  -2    5.60    6.70
  16   6  -2   -1.00    4.50
  16   6   2    4.10    4.10
   5 -16  -2   10.90    7.20
  16   5  -2   13.80    5.40
  16   5   2   17.00    5.00
   4 -16  -2   13.20    8.10
  16   4  -2   16.00    5.80
  16   4   2   16.00    4.80
  16   3  -2   -2.80    4.70
   3 -16  -2    3.80    6.50
  -3  16   2    3.10    8.50
  16   3   2    6.20    4.30
  16   2  -2   -0.20    4.60
   2 -16  -2   -3.30    6.60
  -2  16   2   -4.60    4.90
   2 -16   2   -1.10    4.00
  16   2   2    0.40    3.80
  16   1  -2   26.30    6.60
   1 -16  -2   35.10    9.30
   1 -16   2   25.50    6.70
  -1  16   2   33.40    7.50
  16   1   2   41.80    6.10
  16   0  -2   73.09   10.00
   0 -16  -2   84.09   12.70
   0 -16   2   93.09   13.00
  16   0   2   80.59    8.70
  -1 -16  -2   80.39   12.70
  16  -1  -2   72.99   10.10
  16  -1   2   73.89    8.70
  -1 -16   2  110.99   14.30
  -2 -16  -2   72.39   12.30
  16  -2  -2   73.89   10.00
  -2 -16   2  134.79   17.50
  16  -2   2   78.09    8.90
  -3 -16  -2   45.40   10.60
  16  -3  -2   33.70    8.10
  16  -3   2   41.30    6.40
  -3 -16   2   49.30   10.20
  -4 -16  -2   10.00    8.90
  16  -4  -2    3.60    6.00
  16  -4   2    8.50    4.30
  -4 -16   2   -0.20    5.70
  16  -5  -2   -2.80    6.00
  16  -5   2    3.70    4.30
  -5 -16   2    5.90    5.10
   5  16   2    8.10    5.30
  16  -6  -2   24.10    7.80
   6  16   2   20.00    6.00
  -6 -16   2   11.20    5.90
  16  -6   2    8.30    4.80
  16  -7  -2  117.29   15.00
   7  16   2  129.19   12.90
  -7 -16   2  149.29   16.00
  16  -7   2   96.69   11.20
  16  -8  -2   18.80    8.20
  16  -8   2   28.80    6.00
   8  16   2   25.90    6.70
  16  -9  -2   53.39   11.10
  16  -9   2   47.90    7.60
   9  16   2   49.50    8.40
  16 -10  -2   21.50    9.30
  10  16   2   31.10    7.70
  16 -10   2   30.10    6.90
  16 -11  -2   -3.50    8.10
  11  16   2    7.30    5.90
  16 -11   2    9.30    6.00
  16 -12  -2    4.80    8.10
  12  16   2    8.30    6.50
  16 -13  -2   19.20    9.70
  13  16   2    9.90    6.70
  16 -14  -2    0.40    8.40
  14  16   2   -7.70    5.50
  16 -15  -2    5.20    8.70
  15  16   2   -1.20    5.70
  14 -17  -2   46.70   11.50
  17  14   2    5.30    5.60
  13 -17  -2   31.30   11.30
  17  13   2   35.00    7.50
  12 -17  -2    5.10    8.90
  17  12   2    6.00    5.20
  11 -17  -2   12.20    8.70
  17  11  -2   12.80    6.10
  17  11   2   18.10    6.00
  10 -17  -2    4.30    7.80
  17  10  -2    5.70    5.60
  17  10   2    3.80    4.90
  17   9  -2   30.10    7.30
   9 -17  -2   24.90    9.50
  17   9   2   32.50    6.90
   8 -17  -2   22.90    8.20
  17   8  -2   18.30    6.20
  17   8   2   16.20    5.70
  17   7  -2  185.58   15.90
   7 -17  -2  190.08   18.90
  17   7   2  194.48   15.10
   6 -17  -2  -11.30    6.70
  17   6  -2    5.50    5.30
  17   6   2    4.90    4.80
   5 -17  -2    2.80    7.20
  17   5  -2    5.40    5.20
  17   5   2    9.00    4.70
  17   4  -2   -4.70    4.70
   4 -17  -2   -2.70    7.10
  17   4   2    2.50    4.20
   3 -17  -2   65.39   12.00
  17   3  -2   71.29    9.70
  17   3   2   64.99    8.20
   3 -17   2   65.59    9.90
   2 -17  -2   19.70    8.90
  17   2  -2   22.90    6.60
  17   2   2   23.70    5.40
   2 -17   2   29.20    7.50
  17   1  -2   -0.70    5.20
   1 -17  -2    6.10    8.30
  17   1   2    2.10    4.00
   1 -17   2   -0.90    4.00
   0 -17  -2   33.10   10.40
  17   0  -2   29.30    7.50
   0 -17   2   26.20    8.80
  17   0   2   37.90    6.20
  17  -1  -2    3.30    5.40
  17  -1   2    8.80    4.40
  -1 -17   2    1.00    6.80
  -2 -17  -2   28.20    9.60
  17  -2  -2    9.40    7.00
  -2 -17   2   51.99   11.50
  17  -2   2   25.70    5.70
  17  -3  -2    7.50    6.50
  -3 -17  -2   -2.00    8.50
  -3 -17   2    2.00    7.00
  17  -3   2    5.70    4.40
  17  -4  -2   86.59   12.20
  -4 -17   2  111.69   15.10
  17  -4   2  109.19   10.70
  17  -5  -2   31.20    8.70
  -5 -17   2   22.40    7.30
   5  17   2   27.20    7.10
  17  -5   2   27.30    6.10
  17  -6  -2   -4.80    6.70
   6  17   2    9.20    6.10
  -6 -17   2    6.50    6.10
  17  -6   2   10.20    5.00
  17  -7  -2   26.20    8.10
   7  17   2   21.80    6.60
  17  -7   2    6.40    4.90
  17  -8  -2   -2.20    6.90
  17  -8   2    5.20    5.00
   8  17   2    3.60    5.60
  17  -9  -2  101.09   14.20
  17  -9   2   97.99   11.80
   9  17   2   95.99   12.50
  17 -10  -2   -5.30    7.00
  17 -10   2   -3.30    5.00
  10  17   2   -4.00    5.50
  17 -11  -2    5.90    8.60
  11  17   2   19.70    7.10
  17 -11   2   14.40    6.60
  17 -12  -2    7.60    8.60
  12  17   2    9.50    8.40
  17 -13  -2   12.00    9.60
  17 -14  -2   11.50    8.90
  18  13   2   10.00    5.70
  18  12   2    6.90    5.70
  18  11  -2   33.20    8.20
  18  11   2   27.80    7.10
  18  10  -2   20.00    7.00
  18  10   2   21.60    6.40
  18   9  -2   22.40    7.00
  18   9   2   29.70    6.70
  18   8  -2   14.30    6.20
  18   8   2    2.20    5.00
  18   7  -2    6.40    5.80
  18   7   2    4.30    5.20
  18   6  -2   17.60    6.50
  18   6   2   15.20    5.60
  18   5  -2  116.39   13.10
  18   5   2  107.89   11.80
  18   4  -2   15.60    6.50
  18   4   2   15.30    5.60
  18   3  -2   45.80    8.60
  18   3   2   45.70    7.30
  18   2  -2   -4.30    5.50
  18   2   2   -1.70    4.10
  18   1  -2   18.00    7.20
   1 -18   2   20.30   10.60
  18   1   2   20.60    5.50
  18   0  -2   -0.90    5.90
   0 -18   2    1.90    7.20
  18   0   2    1.80    4.30
  18  -1  -2   13.40    7.10
  -1 -18  -2   17.10   16.10
  18  -1   2   17.60    5.30
  -1 -18   2    8.70    9.30
  18  -2  -2   23.00    7.70
  -2 -18   2   52.99   12.70
  18  -2   2   23.40    5.80
  18  -3  -2   -0.50    6.20
  18  -3   2    1.70    4.60
  -3 -18   2   14.60    7.10
  18  -4  -2   -6.90    7.10
  18  -4   2    0.40    4.70
  -4 -18   2    1.30    5.80
  18  -5  -2    2.50    6.60
  18  -5   2   -1.10    4.80
  18  -6  -2   67.29   11.50
  18  -6   2   49.20    8.10
  18  -7  -2   16.50    8.40
  18  -7   2   13.70    5.90
  18  -8  -2    1.90    8.50
  18  -8   2   16.60    6.20
  18  -9  -2    1.90    7.50
  18  -9   2    2.30    5.30
  18 -10  -2    4.30    8.40
  18 -10   2    2.80    5.90
  18 -11  -2   47.60   12.00
  18 -11   2   60.59   10.00
  18 -12  -2   28.60   10.70
  18 -13  -2   41.40   12.10
  19  12   2   16.80    6.60
  19  11   2   -1.80    5.10
  19  10  -2    8.60    6.60
  19  10   2    8.20    5.80
  19   9  -2    7.30    6.40
  19   9   2   12.60    6.10
  19   8  -2   48.40    9.10
  19   8   2   46.60    8.10
  19   7  -2   21.70    7.30
  19   7   2   13.20    6.20
  19   6  -2   11.20    6.50
  19   6   2    4.90    5.40
  19   5  -2    5.90    5.70
  19   5   2    2.20    5.20
  19   4  -2    2.70    6.00
  19   4   2    1.30    4.80
  19   3  -2   69.89   10.90
  19   3   2   71.09    9.30
  19   2  -2   -5.20    5.80
  19   2   2   -4.40    4.20
  19   1  -2   45.40    9.60
  19   1   2   48.20    7.70
  19   0  -2    4.70    6.40
  19   0   2   -0.70    4.50
  19  -1  -2   31.50    8.80
  19  -1   2   30.90    6.70
  19  -2  -2   -1.10    6.90
  19  -2   2    4.60    5.00
  19  -3  -2   86.99   12.80
  19  -3   2   82.99   10.80
  19  -4  -2   41.50    9.90
  19  -4   2   45.90    8.00
  19  -5  -2   12.40    8.30
  19  -5   2   15.00    6.20
  19  -6  -2   -2.80    7.30
  19  -6   2   -0.40    5.30
  19  -7  -2    4.90    7.90
  19  -7   2   -0.10    5.50
  19  -8  -2   10.30    9.00
  19  -8   2   27.50    7.40
  19  -9  -2   -8.70    7.70
  19  -9   2    1.80    5.80
  19 -10  -2    6.50    8.60
  19 -10   2   12.80    6.80
  19 -11  -2    5.80    8.80
  19 -11   2   -1.30    6.10
  19 -12  -2    4.50    8.70
  20  10  -2   34.10    8.60
  20  10   2   29.20    7.20
  20   9  -2    4.40    6.60
  20   9   2    1.40    5.10
  20   8  -2   -1.20    6.70
  20   8   2    4.50    5.60
  20   7  -2   17.70    7.50
  20   7   2   13.70    6.00
  20   6  -2   19.30    7.70
  20   6   2   16.30    6.30
  20   5  -2   14.50    7.20
  20   5   2   15.60    6.30
  20   4  -2   22.90    8.10
  20   4   2   20.40    6.50
  20   3  -2    3.80    6.40
  20   3   2   -4.10    4.70
  20   2  -2    7.20    7.10
  20   2   2    8.10    5.60
  20   1  -2   68.89   11.20
  20   1   2   54.79    8.60
  20   0  -2   48.40   10.10
  20   0   2   41.40    7.80
  20  -1  -2   70.49   11.70
  20  -1   2   67.09    9.40
  20  -2  -2   17.60    8.30
  20  -2   2   11.60    5.70
  20  -3  -2    1.00    7.30
  20  -3   2   -1.50    5.10
  20  -4  -2   -1.60    7.40
  20  -4   2    1.30    5.80
  20  -5  -2   15.70    8.80
  20  -5   2   15.70    6.90
  20  -6  -2   -0.90    7.60
  20  -6   2   -2.10    5.60
  20  -7  -2    4.80    9.20
  20  -7   2   16.40    7.10
  20  -8  -2   -4.70    8.00
  20  -8   2    3.80    5.90
  20  -9  -2   -5.40    8.20
  20  -9   2    0.30    6.00
  20 -10  -2    4.90    9.10
  20 -10   2   15.20    7.40
  21   8  -2   27.80    8.40
  21   8   2   23.10    7.10
  21   7  -2    5.90    7.10
  21   7   2    6.20    5.90
  21   6  -2    6.60    7.30
  21   6   2   -5.70    5.00
  21   5  -2   -5.50    6.60
  21   5   2   -2.00    5.40
  21   4  -2   12.10    8.00
  21   4   2   17.00    6.40
  21   3  -2   -3.70    6.90
  21   3   2    3.40    5.70
  21   2  -2   25.60    9.00
  21   2   2   31.60    7.50
  21   1  -2   18.30    8.50
  21   1   2   18.00    6.70
  21   0  -2   -6.40    6.80
  21   0   2   -1.40    5.90
  21  -1  -2   17.00    8.60
  21  -1   2   22.90    7.30
  21  -2  -2   20.70    9.30
  21  -2   2   23.30    7.60
  21  -3  -2   42.00   11.00
  21  -3   2   48.20    9.00
  21  -4  -2   -3.40    7.70
  21  -4   2    3.90    6.30
  21  -5  -2    4.70    8.70
  21  -5   2    0.00    5.90
  21  -6  -2   12.70    9.30
  21  -6   2    7.40    6.40
  21  -7  -2   12.70    9.60
  21  -7   2   23.10    7.50
  21  -8  -2   -0.40    8.70
  21  -8   2   10.10    6.60
  22   4  -2   11.50    8.20
  22   4   2    4.40    6.20
  22   3  -2    6.30    7.90
  22   3   2    3.10    6.00
  22   2  -2   11.70    8.20
  22   2   2    1.30    5.90
  22   1  -2   -1.70    7.40
  22   1   2    2.50    6.20
  22   0  -2   37.30   10.70
  22   0   2   52.19    9.50
  22  -1  -2    4.20    8.60
  22  -1   2    5.80    6.60
  22  -2  -2    0.80    8.40
  22  -2   2    0.00    6.20
  22  -3  -2    1.80    8.80
  22  -3   2    3.00    6.40
  22  -4  -2   17.30    9.80
  22  -4   2   15.50    7.40
   0   0  -3   -2.70    3.70
  -1   0  -3  479.05   28.90
   1   0  -3  536.55   28.60
   1  -2  -3  325.57   20.20
  -1   2  -3  333.87   20.00
  -2  -1  -3  372.36   21.40
   2   1  -3  307.37   19.20
  -2  -1   3  306.27   17.70
   0   2  -3    3.60    4.00
  -2   0  -3    7.70    4.70
  -2   0   3    5.50    1.60
   1   2  -3  127.99    9.50
  -1  -2  -3  138.59   12.10
  -2   1  -3   85.49   10.40
  -2   1   3  103.09    7.00
   2  -2  -3 1040.50   52.99
   2   2  -3 1025.10   53.89
  -2  -2  -3 1055.99   55.59
  -2   2  -3 1009.20   54.59
   2  -2  -3 1024.90   54.99
  -2  -2   3 1007.30   52.99
  -2   2   3 1083.39   52.89
   2  -3  -3  383.56   21.50
  -2   3  -3  419.46   23.10
   2  -3  -3  407.16   23.90
   3   2  -3  385.56   22.30
  -3  -2  -3  408.06   24.70
   3   2  -3  416.46   21.70
  -3  -2   3  369.36   21.60
  -2   3   3  387.76   21.30
  -3  -1  -3  202.78   16.30
   0  -3  -3  332.37   21.50
   3   0  -3  367.36   18.70
   3   0  -3  337.37   19.80
   0   3   3  319.37   17.90
  -3   0   3  319.97   18.40
  -1  -3  -3    8.50    5.20
   1   3  -3   13.70    3.80
   3  -1  -3    5.70    2.30
   3  -1  -3    8.20    3.80
  -3   1  -3    5.00    5.10
  -3   1   3    0.70    2.20
   3  -2  -3   33.00    4.40
  -2  -3  -3   29.10    6.60
   2   3  -3   23.00    4.00
  -3   2   3   30.20    4.20
   3  -3  -3   23.80    5.10
  -3  -3  -3   27.40    6.40
   3   3  -3   20.90    3.70
  -3   3   3   33.00    4.20
  -4  -3  -3  114.19   12.60
   4   3  -3  120.49    8.90
   4   3  -3   92.59    7.90
  -4  -3   3   91.29    7.90
   4   2  -3 1894.41   93.49
   2  -4  -3 1779.12   94.99
   2  -4  -3 1822.82   93.09
  -4  -2  -3 1737.73   95.49
   4   2  -3 1751.52   93.59
  -2   4  -3 1920.91   93.79
  -2   4   3 1807.02   92.99
  -4  -2   3 1961.20   93.69
   1  -4  -3   97.89    6.80
  -1   4  -3   68.79    9.00
   4   1  -3   85.99    7.30
   1  -4  -3   93.89   10.20
  -4  -1   3   91.19    7.20
  -1   4   3   85.49    6.60
   0  -4  -3  115.99    7.00
   0  -4  -3   74.89   10.30
   4   0  -3  107.99    7.80
   0   4  -3   79.19    8.60
   4   0  -3  132.19    9.50
   0   4   3   91.69    7.10
  -1  -4  -3   31.10    7.60
   4  -1  -3   26.10    4.80
  -4   1  -3   37.60    6.70
   4  -1  -3   24.10    4.00
  -4   1   3   28.80    4.10
   1   4   3   42.90    5.00
   4  -2  -3 1687.33   87.69
   4  -2  -3 1670.93   88.69
  -2  -4  -3 1707.83   90.09
   2   4  -3 1707.03   87.59
  -2  -4   3 1765.72   87.69
   2   4   3 1741.93   87.19
  -4   2   3 1759.32   87.59
   4  -3  -3   91.89    9.30
   3   4  -3  102.29    8.10
  -3  -4  -3   91.09   10.80
   4  -3  -3   92.49    7.90
  -4   3   3  126.09    7.80
  -3  -4   3  117.39    8.20
   4  -3   3   82.89    7.30
   4  -4  -3  210.98   14.80
   4   4  -3  197.28   12.90
  -4  -4  -3  203.68   16.40
   4  -4  -3  224.18   13.30
   4   4  -3  196.28   13.20
  -4   4   3  218.98   12.80
   4  -4   3  220.48   12.30
  -4  -4   3  197.58   13.40
   4  -5  -3    0.20    4.50
   4  -5  -3    0.50    2.30
  -5  -4  -3    7.20    5.70
   5   4  -3    1.10    2.90
   5   4  -3    0.40    2.20
   5   4   3    2.80    1.90
  -5  -4   3    4.10    2.50
   4  -5   3    1.70    1.80
  -4   5   3    2.20    2.20
   5   3  -3    5.90    2.50
  -5  -3  -3    1.20    6.20
   3  -5  -3   11.80    5.20
   3  -5  -3    3.30    2.30
   5   3   3    3.40    1.90
  -3   5   3    3.70    2.00
  -5  -3   3    7.90    2.80
   3  -5   3    2.90    2.00
   2  -5  -3   75.79    5.90
  -5  -2  -3   61.49    9.60
   5   2  -3   55.99    6.30
   5   2  -3   71.99    7.50
   2  -5  -3   59.79    8.20
  -2   5   3   62.19    5.50
   2  -5   3   47.50    5.00
  -5  -2   3   67.79    6.50
  -1   5  -3    3.40    3.60
   5   1  -3    9.90    3.80
   5   1  -3   11.80    2.90
  -5  -1  -3   21.00    6.40
   1  -5  -3   17.50    5.50
  -1   5   3   11.40    2.50
  -5  -1   3    7.20    2.70
   5   0  -3   61.39    7.00
   5   0  -3   56.79    6.40
  -5   0   3   57.69    5.70
  -1  -5  -3    5.90    1.80
  -1  -5  -3   -5.00    5.90
   5  -1  -3    5.10    2.70
   1   5  -3   -4.80    3.30
  -1  -5  -3    6.90    2.40
  -1  -5   3   -1.30    2.20
   1   5   3    4.90    2.30
   5  -1   3    9.40    2.90
  -5   1   3    1.90    2.30
   5  -2  -3   52.79    6.90
   5  -2  -3   60.59    5.70
  -2  -5  -3   64.69    5.40
  -2  -5  -3   52.39    8.60
  -2  -5  -3   67.79    4.80
   2   5  -3   53.19    5.90
  -2  -5   3   47.30    6.00
   5  -2   3   55.59    5.90
   2   5   3   52.79    5.80
  -5   2   3   46.80    5.30
   5  -3  -3    3.90    2.50
  -3  -5  -3    5.50    4.70
   3   5  -3    6.30    2.60
  -3  -5  -3   10.60    2.00
   3   5  -3    1.00    2.40
  -3  -5  -3    9.70    2.30
   5  -3  -3   -0.10    3.70
  -5   3   3    2.50    2.10
  -3  -5   3    0.30    2.60
  -4  -5  -3  121.89    8.30
   5  -4  -3  115.59    9.00
   4   5  -3  130.49    8.80
  -4  -5  -3  112.89    8.30
  -4  -5  -3  113.69   12.80
   5  -4  -3  109.09   10.90
  -4  -5   3  139.99    9.70
  -5   4   3  124.99    8.60
   5  -4   3  106.69    8.10
  -5  -5  -3    9.60    2.80
   5  -5  -3    3.20    4.50
   5   5  -3    2.60    3.20
  -5  -5  -3   12.30    6.70
   5  -5  -3    8.80    3.70
   5  -5   3   12.70    2.70
  -5  -5   3   12.60    3.60
  -5   5   3    7.70    2.90
  -6  -5  -3   17.10    7.70
  -6  -5  -3    4.10    2.10
   6   5  -3   10.70    3.80
   5  -6  -3    1.80    4.50
  -5   6   3    2.70    2.50
   5  -6   3    1.60    2.10
   6   5   3    2.30    2.30
  -6  -5   3    2.00    3.00
   5  -6   3    1.40    1.90
   6   4  -3  922.41   49.60
  -6  -4  -3  895.41   52.49
   4  -6  -3  933.41   51.49
   4  -6  -3 1013.80   50.69
   6   4   3  888.71   49.00
  -4   6   3 1013.00   49.60
   4  -6   3  934.91   47.90
  -6  -4   3  934.91   50.19
   3  -6  -3   97.19    7.90
   3  -6  -3   96.69   11.40
   6   3  -3  123.79    9.60
  -6  -3  -3  105.99   13.90
   6   3  -3   97.79    8.40
   3  -6   3   97.39    6.30
   6   3   3   97.19    7.30
  -3   6   3   93.49    7.60
  -6  -3   3  101.99    8.70
   6   2  -3   27.30    4.50
   6   2  -3   27.00    5.10
   2  -6  -3   27.50    3.80
   2  -6  -3   21.70    6.00
   6   2   3   20.60    4.20
  -6  -2   3   26.20    4.50
   2  -6   3   23.70    3.50
   2  -6   3   20.10    2.80
  -2   6   3   26.60    3.80
   1  -6  -3    5.70    5.50
   1  -6  -3   19.20    3.20
   6   1  -3   24.80    4.50
  -1   6   3   15.00    3.00
   1  -6   3   15.30    3.10
   6   1   3   12.70    3.80
   1  -6   3   15.60    3.20
  -6  -1   3   17.30    3.50
   6   0  -3  293.87   18.50
   0  -6  -3  304.07   17.00
   0  -6  -3  303.67   21.50
   6   0  -3  306.27   18.00
   6   0   3  274.87   17.60
   0   6   3  310.27   17.60
   0  -6   3  307.77   17.20
  -6   0   3  310.07   17.80
   0  -6   3  307.47   17.70
  -1  -6  -3  124.89    8.10
   6  -1  -3  130.99    9.50
  -1  -6  -3  116.09    8.80
  -1  -6  -3  119.39   13.30
   6  -1  -3  111.49   10.40
   1   6   3  120.59    8.80
  -6   1   3  125.09    8.90
  -1  -6   3  124.49    9.00
   6  -1   3  115.99    9.00
   6  -2  -3    1.50    2.20
  -2  -6  -3    0.90    1.60
   6  -2  -3   -0.70    3.40
  -2  -6  -3    1.10    2.10
  -2  -6  -3   -1.80    5.10
  -2  -6   3   11.30    2.90
   6  -2   3    0.80    2.20
   2   6   3   -0.20    2.40
  -6   2   3   -0.90    1.90
   3   6  -3   -1.70    2.10
  -3  -6  -3   -0.60    2.10
   6  -3  -3    4.10    4.00
  -3  -6  -3   -3.10    4.60
   6  -3  -3   -1.30    2.20
   6  -3   3    1.30    2.20
  -6   3   3   -1.30    1.90
  -4  -6  -3   42.50    5.30
   6  -4  -3   35.20    6.50
  -4  -6  -3   35.10    8.20
   4   6  -3   31.80    4.90
   6  -4  -3   46.70    6.30
  -6   4   3   36.40    5.00
  -4  -6   3   52.29    6.30
   6  -5  -3    1.80    4.90
  -5  -6  -3    9.90    3.00
  -5  -6  -3    1.90    7.60
  -5  -6   3   13.10    3.70
  -6   5   3    7.10    2.90
   6  -5   3    1.30    2.50
  -6  -6  -3  548.45   34.80
   6  -6  -3  530.45   32.30
   6   6  -3  556.94   30.30
  -6  -6  -3  539.45   30.30
   6  -6   3  546.45   29.30
  -6   6   3  577.54   30.60
   6  -6   3  548.75   28.90
  -6  -6   3  569.74   31.60
   7   6  -3    1.50    3.40
  -7  -6  -3    1.40    2.50
   6  -7  -3   11.40    5.90
   6  -7   3    4.80    2.00
   7   6   3    3.80    2.80
  -7  -6   3    5.00    3.70
   7   6   3   -1.40    3.70
   6  -7   3    0.80    2.40
  -6   7   3    3.70    3.10
   5  -7  -3   -3.10    5.60
   7   5  -3    4.60    3.70
  -7  -5  -3    5.30    2.60
   7   5   3    2.40    2.70
   7   5   3    6.90    3.70
   5  -7   3    3.40    2.50
  -7  -5   3    3.20    3.60
  -5   7   3    7.70    3.20
   5  -7   3    6.40    1.90
   4  -7  -3  138.39   13.70
  -7  -4  -3  107.89    8.20
   7   4   3  113.39    9.90
   7   4   3  115.29    8.80
   4  -7   3  115.89    6.90
   4  -7   3  116.49    8.10
  -7  -4   3  128.79   10.30
   3  -7  -3   41.80    7.70
   3  -7   3   47.10    5.20
   7   3   3   39.90    5.60
  -3   7   3   37.90    5.40
   7   3   3   39.30    5.10
   2  -7  -3  134.89   13.60
   7   2  -3  137.69   11.50
   7   2  -3  152.08   11.90
   7   2   3  125.49   10.50
   7   2   3  147.19    9.60
  -7  -2   3  151.88   10.70
   2  -7   3  147.19    9.60
  -2   7   3  137.39   10.20
   7   1  -3   13.40    3.50
   1  -7  -3    6.40    6.10
   7   1  -3   11.90    4.60
   1  -7   3   10.50    3.10
   1  -7   3   11.50    3.00
   7   1   3    5.50    2.60
   7   1   3   11.90    3.60
  -7  -1   3   17.70    3.40
  -1   7   3   14.60    3.50
   7   0  -3   72.49    7.50
   0  -7  -3  110.19   13.40
   7   0  -3   66.99    8.10
  -7   0   3   73.99    6.90
   0   7   3   74.49    7.40
   7   0   3   67.09    7.90
   7  -1  -3   -4.90    3.90
  -1  -7  -3    6.00    3.20
   7  -1  -3    2.20    3.00
  -1  -7  -3   -6.30    5.90
   1   7   3    2.30    2.80
  -1  -7   3    2.80    3.30
   7  -1   3    9.80    3.10
  -7   1   3    0.00    2.20
  -2  -7  -3    1.10    2.70
  -2  -7  -3   -6.90    5.40
   7  -2  -3    3.70    4.20
   7  -2  -3    2.70    2.70
   7  -2   3    2.80    3.10
  -2  -7   3    0.20    2.60
   2   7   3    0.20    3.30
  -7   2   3    0.40    2.20
  -3  -7  -3    8.60    3.50
  -3  -7  -3    1.10    5.50
   7  -3  -3    6.90    4.50
   7  -3  -3    7.90    3.60
   3   7  -3    6.10    2.60
  -3  -7   3    5.10    3.30
   7  -3   3    4.00    2.70
  -7   3   3    7.90    2.80
  -5  -7  -3    0.90    6.70
   7  -5  -3   -4.30    5.20
  -5  -7  -3    5.40    3.00
   5   7  -3    3.20    3.10
  -7   5   3   -0.30    2.70
   7  -5   3    0.50    2.20
   7  -6  -3    4.50    5.30
  -6  -7  -3    8.70    3.30
  -6  -7  -3   16.10    8.70
   6   7  -3   -8.80    3.90
   7  -6   3    3.30    2.20
   7  -6   3    2.00    2.40
  -7   6   3    3.80    3.20
  -6  -7   3    5.10    3.70
   7  -7  -3   24.50    6.60
  -7  -7  -3    3.90    2.90
   7   7  -3    5.90    3.60
   7  -7   3    2.60    2.10
  -7  -7   3   -1.50    3.40
   7   7   3   -1.20    4.00
   7  -7   3   -1.40    2.70
   8   7  -3   24.80    5.10
  -7   8  -3   22.90    4.40
   7  -8  -3   28.90    7.60
  -8  -7   3   34.40    6.00
  -7   8   3   33.40    5.30
   8   7   3   26.50    5.90
   7  -8   3   27.20    3.30
   7  -8   3   22.80    4.50
   8   7   3   25.60    4.90
  -6   8  -3  860.61   46.60
   8   6  -3  812.62   47.20
  -8  -6  -3  878.01   47.40
   6  -8  -3  901.11   49.70
   8   6   3  885.11   47.90
   6  -8   3  905.31   46.70
   8   6   3  910.31   47.80
  -8  -6   3  905.21   48.80
  -6   8   3  942.51   47.80
   6  -8   3  902.91   45.30
   8   5  -3  153.68   12.20
   5  -8  -3  175.88   16.10
  -8  -5  -3  155.58   10.90
  -5   8   3  169.38   11.70
   8   5   3  159.08   11.30
   5  -8   3  161.98   10.80
  -8  -5   3  158.78   12.80
   5  -8   3  153.18    9.10
   8   5   3  160.28   12.20
   4  -8  -3 1381.26   67.89
   8   4  -3 1190.78   65.19
  -8  -4  -3 1193.48   64.29
  -8  -4   3 1289.37   66.29
   8   4   3 1226.68   64.89
   8   4   3 1225.68   65.19
   4  -8   3 1255.07   64.19
  -4   8   3 1251.97   65.09
   4  -8   3 1227.98   62.59
   3  -8  -3    3.30    5.90
   8   3  -3   11.20    4.40
  -3   8   3    5.90    3.40
   8   3   3    5.10    2.60
   3  -8   3    2.80    3.00
   8   3   3    2.40    3.60
   8   2  -3   -1.60    4.00
   2  -8  -3    0.40    5.50
   8   2   3    7.20    3.60
  -2   8   3    1.50    2.80
  -8  -2   3    2.50    3.00
   2  -8   3   -5.30    2.50
   8   2   3    1.60    2.60
   1  -8  -3   39.60    8.20
   8   1  -3   40.90    6.70
   8   1   3   34.50    4.80
  -8  -1   3   46.90    6.50
   1  -8   3   42.10    5.90
  -1   8   3   38.90    5.60
   1  -8   3   28.30    5.10
   8   1   3   34.80    5.10
   8   0  -3 1786.02   92.59
   0  -8  -3 1930.61   95.09
   0  -8   3 1808.62   91.79
   0   8   3 1785.42   91.99
  -8   0   3 1741.13   92.29
   0  -8   3 1799.72   91.69
   8   0   3 1735.13   91.19
   8   0   3 1747.83   91.59
  -1  -8  -3   12.00    7.40
   8  -1  -3   11.00    5.30
  -1  -8  -3   18.50    4.40
   8  -1   3   14.40    3.70
   8  -1   3   13.50    3.30
   1   8   3    9.30    4.10
  -8   1   3   14.90    3.90
  -2  -8  -3  242.68   15.80
   8  -2  -3  229.08   17.00
  -2  -8  -3  239.18   19.50
   8  -2   3  276.07   15.00
  -2  -8   3  229.98   15.90
  -8   2   3  256.47   15.80
   2   8   3  234.08   16.30
   8  -3  -3   -6.00    4.50
  -3  -8  -3   -0.80    3.40
  -3  -8  -3   -6.40    5.60
  -3  -8   3    0.30    2.90
   8  -3   3    5.00    2.90
  -8   3   3   -2.20    2.40
  -4  -8  -3  338.07   25.10
  -4  -8  -3  356.96   21.30
   4   8  -3  325.77   19.50
  -8   4   3  364.46   21.10
   8  -4   3  380.66   19.90
  -4  -8   3  343.77   22.00
   5   8  -3   32.80    4.60
  -5  -8  -3   22.90    8.50
   8  -5  -3   32.60    6.50
  -5  -8  -3   27.50    5.20
  -5  -8   3   29.80    5.80
   8  -5   3   40.90    5.00
   8  -5   3   29.40    4.50
  -8   5   3   25.00    4.70
   8  -6  -3   47.70    8.30
  -6  -8  -3   63.99    7.70
  -6  -8  -3   48.30   11.60
   8  -6   3   43.30    5.50
   8  -6   3   60.99    5.50
  -6  -8   3   51.89    7.60
  -8   6   3   44.30    6.20
   7   8  -3   32.30    5.50
   8  -7  -3   42.80    8.00
   8  -7   3   56.59    5.00
   8  -7   3   39.50    5.50
  -8   7   3   46.20    6.60
  -7  -8   3   48.00    7.50
   8   8  -3   16.70    4.60
   8   8   3   21.60    5.50
  -8  -8   3   27.70    5.70
  -8   8   3   25.90    5.00
   8  -8   3   27.40    4.40
   8   8   3   27.40    5.60
   8  -8   3   26.20    3.50
   9   8  -3    0.30    3.20
   8  -9  -3    7.50    6.10
   8  -9   3    6.70    2.40
  -8   9   3    7.60    3.60
  -9  -8   3    5.30    4.00
   9   8   3    7.90    4.50
   7  -9  -3   14.10    6.50
   9   7  -3    9.20    4.20
   9   7   3    0.80    4.50
   7  -9   3   11.20    2.50
  -9  -7   3   10.20    4.60
   7  -9   3    9.60    3.30
  -7   9   3   13.60    4.30
   9   7   3    6.80    4.40
  -6   9  -3    7.40    3.30
   6  -9  -3    8.40    6.60
   9   6  -3    1.40    4.50
   9   6   3   -0.90    4.30
   9   6   3    7.40    3.60
   6  -9   3    9.00    3.30
  -9  -6   3   18.90    4.80
  -6   9   3    5.10    3.30
  -9  -5  -3    4.00    2.50
   5  -9  -3   29.70    7.30
   9   5  -3   14.50    4.90
  -9  -5   3    4.20    4.10
  -5   9   3    5.80    3.20
   9   5   3    5.30    3.00
   9   5   3   -2.00    3.80
   5  -9   3    4.30    2.70
   4  -9  -3   24.10    7.20
   9   4  -3   16.40    5.30
  -9  -4  -3   10.20    2.90
  -9  -4   3    6.30    4.30
   9   4   3    4.90    3.90
  -4   9   3   16.80    3.90
   9   4   3   11.30    3.30
   4  -9   3    7.70    3.20
   9   3  -3   17.10    5.10
   3  -9  -3   28.20    7.40
  -9  -3  -3   15.40    3.30
  -3   9   3   17.60    4.80
   3  -9   3   15.70    4.20
  -9  -3   3   19.40    5.00
   9   3   3   17.60    4.00
   9   3   3   16.00    4.40
   9   2  -3    2.40    4.20
   2  -9  -3   16.50    6.50
  -2   9   3    2.20    3.70
   9   2   3    7.50    3.60
  -9  -2   3    8.20    3.60
   9   2   3    6.00    3.00
   2  -9   3    3.60    3.30
   9   1  -3   29.10    6.00
   1  -9  -3   23.60    8.30
   9   1   3   20.90    4.10
   1  -9   3   22.60    5.10
  -9  -1   3   28.80    5.00
  -1   9   3   15.40    4.50
   9   1   3   24.60    4.80
   1  -9   3   18.70    4.70
   0  -9  -3   25.50    8.50
   9   0  -3   -1.80    4.90
   9   0   3   11.70    3.70
   0  -9   3    5.10    3.90
   9   0   3    3.60    3.10
   0  -9   3    3.30    4.10
  -9   0   3    9.80    3.70
   0   9   3   13.40    3.80
  -1  -9  -3   19.70    4.60
  -1  -9  -3   26.70    7.70
  -9   1   3    8.70    3.70
   9  -1   3   -0.80    3.70
   9  -1   3    8.10    3.10
   9  -2  -3   61.09    9.60
  -2  -9  -3   68.69    8.40
  -2  -9  -3   69.69   11.40
   9  -2   3   84.29    7.70
  -9   2   3   66.39    7.60
   9  -2   3   69.99    7.10
   2   9   3   69.89    8.80
  -2  -9   3   79.79    9.40
  -3  -9  -3   10.50    7.30
   9  -3  -3   17.70    6.30
  -3  -9  -3   16.60    5.00
  -9   3   3   13.10    4.00
  -3  -9   3   12.90    4.40
   9  -3   3   15.30    3.60
   9  -3   3   14.60    3.60
  -5  -9  -3   13.00    7.70
   6   9  -3   48.40    5.50
   9  -6  -3   32.10    7.70
  -6  -9  -3   36.10   10.80
   9  -6   3   47.70    5.10
  -9   6   3   28.90    5.50
  -6  -9   3   46.50    7.60
   9  -6   3   33.80    5.40
   9  -7  -3   -7.80    4.70
   7   9  -3    7.00    3.00
   9  -7   3    0.30    2.30
  -7  -9   3    2.10    3.70
  -9   7   3   -0.40    3.00
   9  -7   3   -1.90    2.50
   9  -8  -3   69.19    9.70
   8   9  -3   63.59    7.20
   9  -8   3   53.79    5.40
  -8  -9   3   56.89    8.40
  -9   8   3   55.99    7.30
   8   9   3   56.09    7.90
   9  -9  -3   -3.60    5.30
   9   9  -3   -4.60    2.70
  -9  -9   3    2.50    3.60
   9   9   3   -2.30    3.90
  -9   9   3    1.00    3.00
   9  -9   3   -1.10    2.00
   9 -10  -3   24.90    7.60
  10   9   3   18.30    5.60
   9 -10   3   20.00    3.50
  -9  10   3   33.20    5.70
 -10  -9   3   14.20    5.30
  10   8  -3   -5.60    3.60
   8 -10  -3   -3.40    5.50
  10   8   3    1.80    3.80
  -8  10   3   -0.60    3.00
 -10  -8   3   -0.50    3.50
   8 -10   3    2.90    2.40
  10   7  -3    5.60    4.50
   7 -10  -3   11.00    7.00
  -7  10   3   16.60    4.40
  10   7   3    8.80    4.50
   7 -10   3   12.90    2.80
 -10  -7   3   13.90    5.00
  10   6  -3   37.30    6.30
   6 -10  -3   33.80    8.30
  -6  10   3   36.00    6.00
  10   6   3   42.40    6.70
 -10  -6   3   33.40    6.60
   6 -10   3   23.70    7.50
   6 -10   3   36.00    4.50
  10   5  -3  116.79   12.20
   5 -10  -3  144.29   15.90
  10   5   3  139.59   11.40
   5 -10   3  153.18   10.70
  -5  10   3  153.48   11.60
 -10  -5   3  157.28   13.20
  10   5   3  135.39   12.20
  10   4  -3   -6.60    3.90
   4 -10  -3   -0.20    6.60
 -10  -4  -3    5.10    4.30
  10   4   3   -5.90    3.30
  -4  10   3    3.70    3.30
 -10  -4   3    1.50    3.60
  10   4   3    2.10    2.70
   4 -10   3    2.50    2.70
   3 -10  -3   21.90    6.80
 -10  -3  -3    0.60    2.00
 -10  -3   3   -2.90    2.90
  10   3   3   -7.20    3.10
  10   3   3   -0.40    2.60
   3 -10   3   -0.70    3.00
  -3  10   3    1.90    3.30
   2 -10  -3  136.49   14.20
  10   2  -3   82.99   10.30
  -2  10   3  101.49    9.80
 -10  -2   3   92.09    9.20
   2 -10   3   70.29    8.50
  10   2   3   78.99    8.20
  10   2   3   91.39    8.60
  10   1  -3  153.48   13.60
 -10  -1  -3  178.88   10.70
  10   1   3  168.68   12.10
  10   1   3  169.38   11.80
 -10  -1   3  178.38   12.80
   1 -10   3  152.38   12.30
   1 -10   3  136.19   12.50
   0 -10  -3  176.78   17.70
  10   0  -3  134.19   13.70
   0  10   3  161.48   13.00
  10   0   3  169.58   11.60
 -10   0   3  172.38   12.50
  10   0   3  149.69   11.80
  -1 -10  -3   44.60    7.00
  10  -1  -3   40.30    7.40
  -1 -10  -3   36.90    9.30
  -1 -10   3   48.50    9.20
   1  10   3   33.10    6.70
  -1 -10   3   40.30    6.70
 -10   1   3   31.00    5.60
  10  -1   3   36.40    5.50
  10  -1   3   44.90    5.90
  -2 -10  -3   25.80    8.30
  10  -2  -3    3.80    5.70
  -2 -10  -3   14.90    4.70
  -2 -10   3   14.40    4.60
   2  10   3    8.80    4.70
  10  -2   3   13.60    4.00
  10  -2   3   10.50    3.50
 -10   2   3    7.60    3.70
  -2 -10   3   18.80    5.70
  10  -3  -3   13.30    6.30
  -3 -10  -3   14.20    5.30
  -3 -10  -3   16.70    7.60
 -10   3   3    4.60    3.50
  10  -3   3    9.20    3.30
  10  -3   3    7.20    3.50
  -3 -10   3    2.60    4.30
  -4 -10  -3  635.04   38.30
  10  -4  -3  601.54   35.80
  -4 -10   3  582.54   34.90
  10  -4   3  597.94   32.60
 -10   4   3  633.44   34.40
  10  -4   3  613.54   33.60
  10  -5  -3    5.70    6.00
  -5 -10  -3   33.20    9.30
  10  -5   3   13.30    3.90
  -5 -10   3    8.30    5.40
  10  -5   3   14.30    3.30
 -10   5   3    8.80    3.80
  -6 -10  -3 1075.79   54.79
  10  -6  -3  881.11   51.39
  10  -6   3  899.41   48.00
  10  -6   3  925.11   49.40
  -6 -10   3  890.41   51.19
 -10   6   3  913.41   49.99
  10  -8  -3   71.99   10.60
   8  10  -3   52.49    7.10
  10  -8   3   75.99    6.40
  -8 -10   3   70.69    9.70
   8  10   3   70.89    9.50
 -10   8   3   76.69    8.30
   9  10  -3   -6.60    2.70
  10  -9  -3   -2.10    5.70
   9  10   3   -1.70    4.40
 -10   9   3   -2.70    3.20
  10  -9   3    4.10    2.50
  -9 -10   3   -2.00    3.60
  10 -10  -3   60.59   10.90
  10 -10   3   78.69    7.00
  10  10   3  102.49   10.60
 -10 -10   3   65.19    9.70
 -10  10   3   59.79    8.20
  10 -11  -3    0.50    6.00
  11  10  -3   -3.10    4.00
  11  10   3   11.80    5.10
 -10  11   3    3.90    3.50
 -11 -10   3    5.80    4.30
   9 -11  -3    2.20    6.80
  11   9  -3   -7.70    4.20
  -9  11   3    5.80    4.00
 -11  -9   3    4.30    4.40
  11   9   3    4.50    4.60
  11   8  -3   -1.00    4.10
   8 -11  -3   13.30    7.30
  11   8   3    2.70    4.40
 -11  -8   3    3.70    4.30
  -8  11   3    2.80    3.50
  11   7  -3    3.10    4.80
   7 -11  -3    2.50    6.80
 -11  -7   3    8.00    5.00
  -7  11   3   10.20    4.50
  11   7   3   17.00    5.10
   6 -11  -3    6.90    6.00
  11   6  -3   -4.30    3.90
 -11  -6   3    1.30    4.00
  -6  11   3    6.60    3.70
  11   6   3    3.30    4.10
   5 -11  -3   10.50    7.20
  11   5  -3   36.50    6.60
  -5  11   3   20.50    5.10
  11   5   3   17.40    5.40
 -11  -5   3   30.60    6.40
  11   4  -3   -2.10    4.60
   4 -11  -3  -12.00    6.00
 -11  -4   3    4.80    3.90
  -4  11   3    2.30    3.40
  11   4   3    2.50    3.60
   3 -11  -3   -7.00    6.00
  11   3  -3   -2.70    3.90
 -11  -3   3    0.60    3.20
  11   3   3    1.70    2.90
   3 -11   3   -1.50    3.50
  11   3   3   -2.20    3.20
  -3  11   3   -2.00    3.20
   2 -11  -3   -3.70    6.40
  11   2  -3    0.10    5.20
  11   2   3    4.20    3.80
   2 -11   3    6.00    3.80
  11   2   3    3.00    3.10
   2 -11   3    7.10    3.80
  -2  11   3    6.40    4.10
 -11  -2   3    8.10    4.20
   1 -11  -3   -7.20    6.90
  11   1   3    1.40    2.80
   1 -11   3    1.90    3.30
  -1  11   3   -0.40    3.60
   1 -11   3   -3.70    3.20
 -11  -1   3    1.60    3.10
  11   1   3    2.80    3.70
  11   0  -3   24.70    6.60
   0 -11  -3   49.60    9.70
   0  11   3   29.30    6.30
   0 -11   3   28.10    5.40
 -11   0   3   20.20    5.10
  11   0   3   22.20    4.70
   0 -11   3   38.80    7.00
  11   0   3   26.30    5.10
  -1 -11  -3   28.40    9.00
  11  -1  -3   14.10    6.00
  11  -1   3   19.50    4.80
  11  -1   3   21.50    4.50
   1  11   3   35.90    6.70
 -11   1   3   26.20    5.60
  -1 -11   3   28.90    5.80
  -1 -11   3   35.00    8.90
  11  -2  -3   12.50    7.00
  -2 -11  -3   29.80    8.80
  -2 -11   3   36.00    8.20
  11  -2   3   25.60    4.90
  -2 -11   3   26.00    6.40
  11  -2   3   19.50    4.30
 -11   2   3   16.60    4.90
  -3 -11  -3   11.30    8.30
  11  -3  -3    7.10    6.80
 -11   3   3   16.80    4.50
  -3 -11   3   22.60    6.20
  11  -3   3   18.20    4.00
  11  -3   3   21.80    4.60
  -4 -11  -3   -1.70    7.40
  11  -4  -3   -5.50    5.60
 -11   4   3    0.80    3.20
  11  -4   3    2.50    2.80
  -4 -11   3   -1.50    3.60
  11  -4   3   -3.00    2.90
  11  -5  -3    8.10    5.60
 -11   5   3   -0.20    3.30
  -5 -11   3    1.40    4.50
  11  -5   3    3.80    2.90
  -6 -11  -3   26.90    9.70
  11  -6  -3   23.00    7.50
 -11   6   3   30.00    5.40
  11  -6   3   25.10    4.10
  -6 -11   3   29.90    6.40
  11  -7  -3   14.20    6.70
 -11   7   3   16.60    4.90
  -7 -11   3   25.50    6.80
  11  -7   3   16.10    3.60
  11  -8  -3   29.90    8.20
 -11   8   3   45.80    7.10
  11  -8   3   35.50    4.70
  -8 -11   3   35.80    7.50
   8  11   3   35.50    6.90
  11  -9  -3    2.30    6.30
  11  -9   3   -1.30    2.80
  -9 -11   3    5.90    4.70
   9  11   3    3.00    5.00
 -11   9   3    4.30    3.40
  11 -10  -3    7.90    6.60
  11 -10   3    2.70    3.00
 -10 -11   3    2.50    4.20
 -11  10   3   -0.60    3.40
  10  11   3    3.20    4.80
  11 -11  -3   -0.60    6.70
 -11  11   3   -2.60    3.30
 -11 -11   3    1.70    4.40
  11  11   3    7.90    5.10
  11 -12  -3   16.00    8.30
 -12 -11   3    7.50    4.80
  12  11   3    4.60    6.10
  10 -12  -3  138.59   16.40
 -10  12   3  113.79   11.70
 -12 -10   3  123.49   13.30
  12  10   3  132.29   12.90
  12   9  -3   19.60    6.00
   9 -12  -3   18.90    8.50
  -9  12   3   20.70    5.10
 -12  -9   3   18.20    6.20
  12   8  -3   94.39   11.30
   8 -12  -3  107.49   14.10
 -12  -8   3  107.79   12.30
  12   8   3  112.49   10.90
  -8  12   3  114.89   10.90
  12   7  -3   25.90    6.00
   7 -12  -3   15.00    7.80
 -12  -7   3   16.00    6.00
  12   7   3   24.60    5.70
  -7  12   3   21.50    5.40
   6 -12  -3  608.24   37.30
  12   6  -3  571.14   34.50
  12   6   3  597.54   34.00
  -6  12   3  595.24   34.70
 -12  -6   3  635.64   36.20
  12   5  -3   32.00    6.80
   5 -12  -3   20.10    7.90
  12   5   3   41.00    6.20
  -5  12   3   32.40    6.10
 -12  -5   3   30.40    6.30
   4 -12  -3  194.78   17.70
  12   4  -3  194.68   15.50
  12   4   3  178.08   14.10
  -4  12   3  207.78   15.20
 -12  -4   3  214.28   15.60
  12   3  -3   -0.50    4.60
   3 -12  -3   -7.30    6.10
 -12  -3   3    1.80    3.50
  -3  12   3    4.10    3.70
   2 -12  -3    8.10    7.60
  12   2  -3   12.50    5.60
 -12  -2   3   11.70    4.40
  12   2   3   23.10    4.80
   2 -12   3   28.20    5.60
  -2  12   3   19.60    5.60
  12   1  -3   52.59    8.80
   1 -12  -3   63.09   11.30
 -12  -1   3   62.89    8.10
  12   1   3   61.59    7.70
  -1  12   3   70.99    9.10
   1 -12   3   54.19    7.50
  12   0  -3  218.38   17.10
   0 -12  -3  254.87   20.40
   0  12   3  235.68   17.10
 -12   0   3  230.98   16.30
  12   0   3  216.08   14.80
   0 -12   3  216.38   16.50
  12  -1  -3    3.20    5.40
  -1 -12  -3    8.40    7.70
  12  -1   3   15.70    3.80
   1  12   3   12.60    5.40
 -12   1   3    7.30    3.90
  -1 -12   3   15.50    7.60
  12  -2  -3   10.70    6.10
  -2 -12  -3    8.10    8.30
  -2 -12   3   29.20    6.80
 -12   2   3   11.30    4.50
  12  -2   3   14.10    3.90
  12  -3  -3   35.20    8.10
  -3 -12  -3   27.20   10.30
 -12   3   3   35.00    5.90
  -3 -12   3   46.40    7.50
  12  -3   3   40.90    5.30
  -4 -12  -3    6.00    9.00
  12  -4  -3   11.50    6.40
  -4 -12   3   14.70    5.20
  12  -4   3   20.90    4.20
 -12   4   3   17.10    4.80
  12  -5  -3   71.99   10.70
  -5 -12  -3   71.19   13.00
 -12   5   3   54.09    7.80
  12  -5   3   63.39    6.90
  -5 -12   3   82.09   10.70
  -6 -12  -3  201.88   20.50
  12  -6  -3  167.28   16.70
 -12   6   3  190.38   14.20
  -6 -12   3  195.78   16.40
  12  -6   3  195.78   12.50
  12  -7  -3    5.10    6.40
  12  -7   3   14.50    3.40
  -7 -12   3   11.90    5.60
 -12   7   3    5.60    3.70
  12  -8  -3   -5.60    5.80
 -12   8   3    1.50    3.40
   8  12   3   -3.60    4.50
  12  -8   3    0.10    3.00
  -8 -12   3    5.20    4.50
  12  -9  -3    4.80    6.50
   9  12   3   13.00    6.10
 -12   9   3    6.80    4.00
  -9 -12   3   11.50    5.80
  12  -9   3    8.10    3.30
  12 -10  -3  211.88   19.60
  10  12   3  241.08   17.60
 -12  10   3  234.48   19.60
 -10 -12   3  215.78   18.60
  12 -10   3  238.78   14.90
  12 -11  -3   16.50    7.90
 -11 -12   3    7.90    5.40
  11  12   3   11.40    5.80
  12 -12  -3   38.40   10.20
 -12 -12   3   40.60    8.50
  12  12   3   54.39    8.90
  12 -13  -3  -11.70    6.70
  13  12   3    0.40    5.00
  11 -13  -3   -0.60    7.50
  13  11   3   -0.10    5.00
 -13 -11   3    4.90    6.60
  10 -13  -3    5.90    8.40
  13  10  -3   10.00    5.80
  13  10   3   13.90    5.90
 -13 -10   3   25.00    6.90
  13   9  -3   11.30    5.70
   9 -13  -3    8.00    7.90
  -9  13   3   13.10    4.90
  13   9   3    7.10    5.20
 -13  -9   3   13.50    6.10
  13   8  -3    4.10    6.20
   8 -13  -3    8.60    8.10
  -8  13   3   18.20    5.60
 -13  -8   3   16.30    6.50
  13   8   3   19.70    6.10
   7 -13  -3    6.30    7.10
  13   7  -3   10.20    5.50
  13   7   3    8.80    4.80
 -13  -7   3    2.50    5.00
  -7  13   3    2.50    3.80
   6 -13  -3   -2.20    6.30
  13   6  -3   17.50    5.60
 -13  -6   3    5.00    4.50
  -6  13   3    6.80    4.20
  13   6   3   -0.40    3.80
  13   5  -3   16.70    5.80
   5 -13  -3    2.40    6.90
 -13  -5   3    9.80    4.80
  -5  13   3    4.50    4.30
  13   5   3    9.80    4.70
  13   4  -3   12.40    5.90
   4 -13  -3   10.80    7.50
  13   4   3    9.60    4.50
 -13  -4   3   12.40    5.00
  -4  13   3   17.10    5.30
  13   3  -3   15.80    6.00
   3 -13  -3    8.70    7.30
  -3  13   3   20.60    5.80
 -13  -3   3    9.80    4.80
  13   3   3   16.00    4.90
   2 -13  -3    8.90    7.80
  13   2  -3   14.70    6.10
   2 -13   3   15.20    5.00
  13   2   3   22.10    5.30
  -2  13   3   21.40    6.00
 -13  -2   3   16.20    5.10
  13   1  -3    0.20    5.10
   1 -13  -3    0.40    7.30
   1 -13   3    1.40    3.70
 -13  -1   3    5.60    3.70
  13   1   3    6.30    3.60
  -1  13   3   -2.30    4.20
   0 -13  -3   -2.40    6.80
  13   0  -3   -3.90    4.70
   0 -13   3    3.80    4.80
 -13   0   3   -0.10    3.50
  13   0   3    4.10    3.40
   0  13   3   -1.00    4.70
  -1 -13  -3   14.60    7.60
  13  -1  -3    1.80    5.20
  -1 -13   3   -6.60    6.50
  13  -1   3    3.30    3.30
 -13   1   3   -3.70    3.10
   1  13   3   12.50    4.90
  -2 -13  -3    4.20    7.70
  13  -2  -3    0.90    5.90
  13  -2   3    1.00    3.30
 -13   2   3   -0.60    3.40
  -3 -13  -3    0.70    8.30
  13  -3  -3  -11.80    5.60
  13  -3   3   12.80    3.90
 -13   3   3   -1.30    3.00
  -3 -13   3    8.90    5.10
  -4 -13  -3   -1.70    7.90
  13  -4  -3   -0.50    6.20
  -4 -13   3   10.90    4.60
  13  -4   3    6.40    3.30
 -13   4   3   -0.50    2.90
  -5 -13  -3    7.90    9.00
  13  -5  -3   -0.50    5.90
 -13   5   3   -0.50    3.10
  -5 -13   3    2.50    4.10
  13  -5   3   -2.40    3.10
  13  -6  -3   -2.30    6.20
  -6 -13  -3  -14.90    8.20
 -13   6   3   -1.70    3.20
  13  -6   3   -4.30    2.80
  13  -7  -3   29.10    7.80
   7  13   3   -4.90    4.50
  13  -7   3    1.10    3.10
  -7 -13   3    7.10    5.20
 -13   7   3   -0.40    3.30
  13  -8  -3   -0.70    6.00
 -13   8   3   -1.80    3.30
   8  13   3    0.20    5.00
  13  -8   3   -0.40    2.90
  -8 -13   3    3.90    4.70
  13  -9  -3    5.80    6.70
  13  -9   3    0.40    3.20
  -9 -13   3    1.70    4.70
   9  13   3    0.20    5.30
  13 -10  -3   11.70    7.80
  10  13   3   16.30    6.50
 -10 -13   3   13.00    6.10
  13 -10   3   12.20    4.10
  13 -11  -3   11.60    8.30
 -11 -13   3    9.00    5.60
  11  13   3   14.20    6.20
  13 -12  -3    6.60    8.40
  12  13   3   24.50    7.10
  13 -13  -3    3.40    8.10
  13  13   3    6.20    5.60
  13 -14  -3   -4.30    8.20
  14  13   3   -0.10    5.50
  12 -14  -3   26.40   10.40
  14  12   3   35.90    7.90
  11 -14  -3   -0.20    7.80
  14  11   3    4.30    5.60
  10 -14  -3    1.90    7.60
  14  10  -3   -6.60    5.50
  14  10   3  -10.80    4.90
  14   9  -3    7.70    5.60
   9 -14  -3   -2.30    7.10
 -14  -9   3    9.60    7.20
  14   9   3    0.20    5.10
   8 -14  -3    1.20    7.60
  14   8  -3    7.30    5.30
  -8  14   3    5.60    5.30
 -14  -8   3    2.00    5.30
  14   8   3    2.80    5.00
  14   7  -3   33.30    7.30
   7 -14  -3   22.80    9.10
  -7  14   3   30.20    7.30
 -14  -7   3   25.50    6.70
  14   7   3   32.50    6.70
  14   6  -3  182.88   15.50
   6 -14  -3  187.18   18.40
  14   6   3  184.28   15.00
 -14  -6   3  195.28   16.20
  -6  14   3  192.38   15.80
   5 -14  -3   -4.20    6.40
  14   5  -3    8.50    5.50
 -14  -5   3    2.00    4.40
  14   5   3   -3.80    4.10
  -5  14   3    3.50    4.20
  14   4  -3   12.30    5.70
   4 -14  -3    0.60    7.50
  -4  14   3    7.20    4.50
 -14  -4   3   11.30    4.90
  14   4   3   14.10    5.30
   3 -14  -3   34.50   10.00
  14   3  -3   31.50    7.30
  14   3   3   32.30    6.20
   3 -14   3   41.60    7.10
  -3  14   3   33.00    7.10
 -14  -3   3   35.40    7.10
   2 -14  -3  113.09   15.60
  14   2  -3  123.29   13.10
  14   2   3  138.79   11.50
 -14  -2   3  147.89   12.80
   2 -14   3  125.89   12.70
  -2  14   3  123.19   13.20
   1 -14  -3   -2.50    6.90
  14   1  -3   -3.00    5.40
   1 -14   3   -3.90    3.50
  14   1   3    1.40    3.70
 -14  -1   3   -0.40    3.30
  -1  14   3    3.40    5.10
  14   0  -3  202.78   17.00
   0 -14  -3  204.18   20.00
  14   0   3  192.18   14.10
 -14   0   3  208.48   15.80
   0 -14   3  218.58   17.40
   0  14   3  200.58   17.10
  14  -1  -3   -1.20    5.60
  -1 -14   3   19.60    8.30
  14  -1   3    2.30    3.50
 -14   1   3    8.60    4.10
  14  -2  -3    8.10    6.20
  -2 -14  -3    9.20    8.50
  -2 -14   3   31.20    7.50
  14  -2   3    6.10    3.90
 -14   2   3   10.80    4.30
  -3 -14  -3    2.90    8.50
  14  -3  -3    6.80    6.40
  -3 -14   3    3.40    5.60
  14  -3   3    5.20    3.70
 -14   3   3    4.20    4.00
  -4 -14  -3  336.17   27.10
  14  -4  -3  332.17   24.10
  14  -4   3  353.56   20.50
  -4 -14   3  335.07   23.50
 -14   4   3  349.37   22.30
  -5 -14  -3  -18.80    8.90
  14  -5  -3   10.70    6.90
  -5 -14   3    3.60    4.60
  14  -5   3    6.20    3.60
 -14   5   3    3.90    3.90
  -6 -14  -3  303.57   26.30
  14  -6  -3  274.57   22.80
  -6 -14   3  328.07   23.30
  14  -6   3  308.37   18.50
 -14   6   3  304.47   20.40
  14  -7  -3    5.90    6.70
  -7 -14   3    3.60    4.70
   7  14   3    2.50    5.30
  14  -7   3    1.10    3.20
  14  -8  -3   -1.20    6.50
   8  14   3   -2.60    4.80
  14  -8   3   -1.20    3.10
  -8 -14   3   -0.80    5.40
  14  -9  -3    1.00    6.50
   9  14   3    3.70    5.70
  14  -9   3    5.30    3.90
  -9 -14   3    6.10    5.50
  14 -10  -3    5.30    7.80
 -10 -14   3    4.70    5.10
  10  14   3    5.30    5.90
  14 -10   3   16.20    4.70
  14 -11  -3   12.50    8.60
  11  14   3   10.70    6.20
  14 -12  -3  -10.20    7.10
  12  14   3    1.50    5.80
  14 -13  -3   -6.10    7.70
  13  14   3   -7.50    4.70
  14 -14  -3    1.40    8.80
  14  14   3    0.80    6.00
  14 -15  -3   -1.40    8.90
  15  14   3    9.20    7.00
  13 -15  -3    2.50    8.60
  15  13   3   -5.30    5.40
  12 -15  -3   -8.40    7.50
  15  12   3    4.30    5.80
  11 -15  -3   -1.50    7.90
  15  11   3    0.20    5.10
  15  10  -3   -1.00    6.60
  10 -15  -3    1.80    7.60
  15  10   3    2.70    5.50
  15   9  -3    3.30    5.80
   9 -15  -3   -0.50    7.50
  15   9   3   10.90    5.80
   8 -15  -3    3.40    7.40
  15   8  -3    3.50    5.50
  15   8   3    2.70    5.70
   7 -15  -3   17.90    8.60
  15   7  -3   19.70    6.70
  15   7   3   16.10    6.10
   6 -15  -3   -2.90    6.90
  15   6  -3   -0.60    5.10
  -6  15   3    0.30    4.20
 -15  -6   3    0.50    4.50
  15   6   3    7.00    5.00
  15   5  -3    6.60    5.40
   5 -15  -3    1.90    7.10
 -15  -5   3    0.50    3.70
  -5  15   3    1.80    4.20
  15   5   3   -0.70    4.20
  15   4  -3  -11.40    5.30
   4 -15  -3   -3.90    7.10
 -15  -4   3   -1.60    3.80
  -4  15   3   -3.20    4.50
  15   4   3   -3.40    4.10
  15   3  -3   -6.10    5.40
   3 -15  -3   -7.20    7.10
 -15  -3   3    1.00    4.30
  -3  15   3    5.80    5.00
  15   3   3   -1.50    3.90
   2 -15  -3    2.20    8.20
  15   2  -3   -1.00    5.30
   2 -15   3   -3.30    3.70
  15   2   3    0.20    3.70
 -15  -2   3   -5.40    3.20
  -2  15   3   -0.20    5.10
  15   1  -3   -2.00    5.00
   1 -15  -3   -4.80    7.20
   1 -15   3   -2.40    5.00
  -1  15   3   -0.50    4.90
  15   1   3   -2.80    3.60
 -15  -1   3   -2.80    3.70
   0 -15  -3   19.40    9.00
  15   0  -3   18.20    7.30
  15   0   3   11.70    4.30
 -15   0   3   15.70    5.50
   0  15   3   13.80    6.10
   0 -15   3   13.60    7.10
  15  -1  -3    7.90    7.50
  -1 -15  -3   28.00    9.90
 -15   1   3   11.70    5.00
  15  -1   3   15.40    4.70
  -1 -15   3   45.70   10.60
  15  -2  -3   21.40    7.40
  -2 -15   3   18.40    8.00
  -3 -15  -3   15.10    9.40
  -4 -15  -3    7.10    9.10
  15  -4  -3    5.30    6.80
  -4 -15   3    1.50    4.70
  15  -4   3    5.40    4.10
  -5 -15  -3   -6.90    8.70
  15  -5  -3    0.00    6.60
  15  -5   3   -0.90    3.60
  -5 -15   3    1.30    4.50
  15  -6  -3   11.50    7.60
  -6 -15   3   14.30    6.50
  15  -6   3   10.70    4.10
   7  15   3   14.10    6.30
  15  -8  -3   10.20    7.80
   8  15   3   14.60    6.80
  15  -8   3   11.60    4.40
  -8 -15   3    9.30    7.20
  15  -9  -3    7.50    8.20
  15  -9   3   18.70    5.10
   9  15   3   20.10    7.00
  -9 -15   3   15.60    7.00
  15 -10  -3   -6.20    7.20
  10  15   3   11.60    6.00
  15 -10   3   14.70    4.80
  15 -11  -3    5.30    8.30
  11  15   3    6.10    6.60
  15 -12  -3   -5.70    7.60
  12  15   3    0.60    5.90
  15 -13  -3   -2.20    7.90
  13  15   3   -1.50    5.50
  15 -14  -3   -5.40    8.10
  14  15   3    2.70    6.40
  15 -15  -3    4.00    9.60
  15  15   3   -1.40    6.20
  14 -16  -3   35.00   12.20
  16  14   3   43.90    9.10
  13 -16  -3    1.40    9.00
  16  13   3    3.30    6.50
  12 -16  -3   98.29   16.30
  16  12   3  113.29   13.30
  11 -16  -3   -2.80    8.10
  16  11   3    3.70    5.50
  10 -16  -3    8.80    8.70
  16  10   3    8.30    5.90
   9 -16  -3   33.50    9.20
  16   9  -3    3.40    6.00
  16   9   3    9.60    6.10
   8 -16  -3  204.98   20.70
  16   8  -3  176.18   17.10
  16   8   3  209.78   16.40
  16   7  -3   -0.50    6.00
   7 -16  -3    5.10    8.00
  16   7   3   10.00    5.70
   6 -16  -3   82.29   13.30
  16   6  -3   87.29   11.50
  16   6   3  110.09   11.40
   5 -16  -3  -12.50    6.70
  16   5  -3    3.90    5.80
  16   5   3   -3.90    4.20
   4 -16  -3    4.40    8.80
  16   4  -3   22.80    7.40
  -4  16   3   18.20    6.80
  16   4   3   27.10    6.00
   3 -16  -3   -2.60    8.60
  16   3  -3    4.50    6.10
  -3  16   3    5.20    6.20
  16   3   3    4.90    4.70
   2 -16  -3    1.90    7.80
  16   2  -3   -3.00    5.30
  -2  16   3   -0.20    5.10
  16   2   3   -1.20    3.90
   1 -16  -3    2.40    8.30
  16   1  -3   -1.50    5.50
  16   1   3    0.40    3.90
  -1  16   3    4.20    5.20
   1 -16   3    0.70    6.70
   0 -16  -3   28.40   10.70
  16   0  -3   47.70    9.40
   0 -16   3   53.29   10.80
  16   0   3   47.40    6.80
  16  -1  -3    6.30    6.40
  -1 -16  -3    8.10    8.90
  -1 -16   3    2.00    7.70
  16  -1   3    5.00    4.20
  -2 -16  -3    2.50    8.90
  16  -2  -3   18.40    7.50
  -2 -16   3   15.40    7.80
  16  -2   3    9.60    4.70
  16  -3  -3    6.60    6.60
  -3 -16  -3   -0.90    9.00
  -3 -16   3    7.70    7.00
  16  -3   3    8.30    4.30
  16  -4  -3  310.17   23.90
  -4 -16  -3  280.57   26.10
  16  -4   3  339.47   19.90
  -4 -16   3  299.47   23.20
  -5 -16  -3   13.50   10.00
  16  -5  -3    7.60    7.40
  16  -5   3    7.80    4.40
  -5 -16   3    1.80    5.10
  16  -6  -3  180.98   18.40
   6  16   3  187.38   15.70
  16  -6   3  169.48   13.50
  16  -7  -3   -2.00    7.20
   7  16   3    2.40    5.50
  16  -7   3    0.00    3.90
  16  -8  -3   72.19   12.90
   8  16   3   82.49   11.20
  16  -8   3   59.39    7.80
  16  -9  -3    2.70    8.30
   9  16   3    0.10    6.10
  16  -9   3    4.40    4.70
  16 -10  -3  127.89   17.30
  10  16   3  159.18   15.60
  16 -10   3  162.48   13.50
  16 -11  -3    0.80    8.20
  11  16   3    1.90    6.10
  16 -12  -3   -3.70    7.90
  12  16   3   35.50    7.90
  16 -13  -3    5.20    8.80
  13  16   3   -1.60    5.60
  16 -14  -3   19.70   10.60
  14  16   3   28.50    8.30
  13 -17  -3    1.70    9.30
  17  13   3   -5.70    5.50
  12 -17  -3    0.90    9.00
  17  12   3   -5.40    5.60
  11 -17  -3   19.00   10.40
  17  11   3    1.70    5.70
  10 -17  -3   18.70   10.10
  17  10   3   12.80    6.50
   9 -17  -3   -2.00    7.90
  17   9  -3    6.40    6.40
  17   9   3    4.50    5.60
  17   8  -3    9.50    6.80
   8 -17  -3   21.00   10.30
  17   8   3   11.30    6.20
  17   7  -3   43.30    8.60
   7 -17  -3    2.40    8.50
  17   7   3    4.20    5.50
   6 -17  -3   -2.00    7.70
  17   6  -3   -4.60    5.90
  17   6   3    4.00    5.20
  17   5  -3   14.20    7.10
   5 -17  -3   32.60   10.10
  17   5   3   11.80    5.40
   4 -17  -3    1.30    8.20
  17   4  -3   12.20    7.00
  17   4   3   19.60    5.80
   3 -17  -3   -7.70    7.90
  17   3  -3    5.70    6.60
  17   3   3   -3.50    4.00
  17   2  -3   10.10    6.70
   2 -17  -3   -8.70    8.50
  17   2   3    2.60    4.50
  -2  17   3    2.30    5.50
   1 -17  -3   -7.80    8.50
  17   1  -3   -5.30    5.70
  -1  17   3    2.40    5.20
  17   1   3   -4.70    4.00
  17   0  -3   -8.40    6.30
   0 -17  -3   -9.50    8.20
  17   0   3   -0.90    4.10
  -1 -17  -3   -5.20    9.10
  17  -1  -3    0.30    6.40
  17  -1   3    2.50    4.20
  -2 -17  -3  -10.90    8.50
  17  -2  -3    3.70    7.20
  17  -2   3    7.90    4.60
  17  -3  -3    3.60    7.10
  -3 -17  -3   59.69   12.10
  17  -3   3   14.40    5.00
  -4 -17  -3   -0.60    9.80
  17  -4  -3    1.00    7.30
  17  -4   3   -5.80    4.20
  -5 -17  -3   -4.50    9.40
  17  -5  -3    3.00    8.00
  17  -5   3    2.10    4.50
  17  -6  -3    7.80    7.90
  17  -6   3    6.40    4.70
   6  17   3   12.30    6.60
  17  -7  -3    9.60    8.60
   7  17   3   19.20    7.00
  17  -7   3   13.30    5.30
  17  -8  -3    5.30    7.90
   8  17   3    1.30    5.90
  17  -8   3    2.00    4.60
  17  -9  -3   -1.10    7.90
   9  17   3    7.80    6.50
  17  -9   3    6.50    5.00
  17 -10  -3    8.70    8.90
  17 -10   3    2.00    5.20
  10  17   3    1.10    6.10
  17 -11  -3   -5.10    8.30
  11  17   3    4.50    6.60
  17 -12  -3   10.10    9.60
  12  17   3    5.80    6.40
  17 -13  -3   14.30    9.60
  13  17   3   14.80    7.40
  12 -18  -3   14.00   10.80
  18  12   3   29.20    7.60
  11 -18  -3    0.70    9.50
  18  11   3   -1.20    5.30
  10 -18  -3   13.90    9.70
  18  10   3    9.80    6.10
  18   9  -3    7.70    7.00
   9 -18  -3    6.80    9.20
  18   9   3    5.00    5.70
   8 -18  -3  165.78   20.20
  18   8  -3  176.28   17.40
  18   8   3  172.98   15.40
   7 -18  -3   -2.00    8.50
  18   7  -3    8.70    6.70
  18   7   3    5.20    5.50
   6 -18  -3   94.09   15.50
  18   6  -3  100.09   13.10
  18   6   3  132.19   12.90
   5 -18  -3   11.70    9.20
  18   5  -3   10.00    7.00
  18   5   3    4.30    5.20
   4 -18  -3   56.89   12.80
  18   4  -3   54.69   10.40
  18   4   3   60.09    8.50
   3 -18  -3    9.20    9.40
  18   3  -3    7.30    6.80
  18   3   3    8.90    5.30
  18   2  -3  142.79   16.10
   2 -18  -3  130.49   18.50
  18   2   3  151.08   13.30
   1 -18  -3   -2.60    8.70
  18   1  -3   -3.60    6.30
  18   1   3    7.20    4.90
  18   0  -3    0.20    6.90
   0 -18  -3   -8.10    8.70
  18   0   3   -2.50    4.20
  18  -1  -3   -6.40    6.30
  -1 -18  -3   26.00   10.40
  18  -1   3    5.40    4.40
  18  -2  -3   16.30    8.10
  -2 -18  -3   32.50   11.40
  18  -2   3   18.60    5.50
  -3 -18  -3   11.60   10.10
  18  -3  -3   -2.00    7.80
  18  -3   3    5.90    4.70
  -4 -18  -3   12.60   10.90
  18  -4  -3   27.40    9.00
  18  -4   3   11.40    5.20
  18  -5  -3   -2.90    7.50
  18  -5   3   -1.80    4.80
  18  -6  -3    9.20    8.10
   6  18   3   -1.50    6.10
  18  -6   3   -5.00    4.40
  18  -7  -3    2.90    7.90
   7  18   3   -7.80    6.20
  18  -7   3   -2.00    4.50
  18  -8  -3   13.20    9.20
   8  18   3   18.10    7.30
  18  -8   3    5.10    5.40
  18  -9  -3   -1.70    8.50
  18  -9   3    6.90    5.60
   9  18   3   23.40    7.30
  18 -10  -3   47.50   12.40
  10  18   3   61.79   10.50
  18 -10   3   54.99   11.80
  18 -11  -3    7.40    9.20
  11  18   3    1.30    6.30
  18 -12  -3    8.40    9.20
  12  18   3    3.10    6.30
  19  10   3    1.00    5.70
  19   9  -3   12.40    7.70
  19   9   3    1.10    5.40
  19   8  -3   11.40    7.50
  19   8   3    0.50    5.30
  19   7  -3    3.40    7.10
  19   7   3   -1.90    5.10
  19   6  -3    2.50    7.00
   6 -19  -3    6.20   13.00
  19   6   3    3.70    5.70
  19   5  -3    5.70    7.40
   5 -19  -3   14.40   12.70
  19   5   3   10.30    5.90
   4 -19  -3   16.10   11.00
  19   4  -3    7.70    7.20
  19   4   3    5.50    5.30
   3 -19  -3   -4.00    9.00
  19   3  -3    2.60    7.10
  19   3   3   -1.00    4.90
   2 -19  -3    1.00    9.60
  19   2  -3    1.50    7.00
  19   2   3   -3.50    4.40
   1 -19  -3    5.90   10.50
  19   1  -3   11.10    8.10
  19   1   3   14.70    5.70
   0 -19  -3   18.40   11.50
  19   0  -3   10.20    8.20
  19   0   3    9.10    5.20
  19  -1  -3   -6.10    7.10
  -1 -19  -3   -9.00    8.70
  19  -1   3    2.70    4.80
  -2 -19  -3   19.80   11.30
  19  -2  -3    4.20    7.80
  19  -2   3   10.50    5.30
  19  -3  -3    4.70    8.20
  -3 -19  -3   -6.10   10.20
  19  -3   3    0.80    4.80
  -4 -19  -3   12.90   11.70
  19  -4  -3  -10.20    7.60
  19  -4   3   -7.60    4.50
  19  -5  -3   -2.60    7.90
  19  -5   3   -9.90    4.80
  19  -6  -3   -7.70    8.00
  19  -6   3    1.50    5.00
  19  -7  -3   -4.00    7.90
  19  -7   3    2.20    5.10
  19  -8  -3   -1.60    8.40
  19  -8   3    2.10    5.20
  19  -9  -3   -5.10    8.30
  19  -9   3    4.30    5.50
  19 -10  -3   10.40    9.20
  20   8  -3   11.80    7.80
  20   8   3    2.30    5.70
  20   7  -3   20.00    8.80
  20   7   3   11.50    6.50
  20   6  -3   -4.00    7.50
  20   6   3   -1.30    5.30
  20   5  -3    2.20    7.50
  20   5   3    5.60    5.60
  20   4  -3   23.10    9.30
  20   4   3   16.00    6.40
  20   3  -3    8.80    7.90
  20   3   3    5.40    5.70
  20   2  -3  144.69   17.50
  20   2   3  135.29   13.70
  20   1  -3    0.50    7.60
  20   1   3   -5.10    5.10
  20   0  -3   -1.90    7.50
  20   0   3   -2.70    5.00
  20  -1  -3   11.00    8.30
  20  -1   3    4.70    5.40
  20  -2  -3  191.98   20.70
  20  -2   3  189.68   15.70
  20  -3  -3   11.30    8.90
  20  -3   3    0.50    5.40
  20  -4  -3   84.19   14.60
  20  -4   3   86.49   11.60
  20  -5  -3   -4.30    8.30
  20  -5   3   -3.10    5.10
  20  -6  -3    0.40    8.30
  20  -6   3    2.70    5.60
  20  -7  -3   -4.20    8.40
  20  -7   3   -0.90    5.30
  20  -8  -3    9.50    9.80
  20  -8   3    7.80    6.10
  21   5  -3   -0.10    7.60
  21   5   3   -3.40    5.30
  21   4  -3   -6.80    7.30
  21   4   3   -6.70    4.80
  21   3  -3    1.90    7.70
  21   3   3   -2.00    5.20
  21   2  -3    4.20    8.30
  21   2   3    3.80    5.80
  21   1  -3    8.30    8.70
  21   1   3    1.90    5.90
  21   0  -3    7.70    9.20
  21   0   3   16.00    6.50
  21  -1  -3    5.40    8.80
  21  -1   3   17.20    6.70
  21  -2  -3    6.30    8.60
  21  -2   3    1.40    5.70
  21  -3  -3    5.60    9.10
  21  -3   3    1.60    5.50
  21  -4  -3   12.60    9.70
  21  -4   3    7.90    6.10
  21  -5  -3    0.20    8.90
  21  -5   3    4.80    5.80
   0   0  -4   57.99    8.70
   0  -1  -4    5.40    6.00
   0   1  -4   -2.70    4.70
  -1   0  -4    8.40    5.60
   1   0  -4   -9.80    4.10
   1   1  -4   72.09   10.30
   1  -1  -4  105.19   11.30
  -1   1  -4   96.59   12.00
   2   1  -4  121.09   12.20
   1  -2  -4  170.78   14.10
  -1   2  -4  108.59   13.20
  -2  -1  -4  143.79   14.50
  -2   0  -4   -2.80    5.70
   0  -2  -4   -4.30    6.10
   2  -1  -4   16.00    5.80
  -1  -2  -4   16.80    7.10
  -2   1  -4   31.30    7.30
  -2   1   4   15.50    2.80
   2  -2  -4   27.50    6.60
  -2   3  -4    6.70    6.30
  -3  -2  -4    9.30    6.70
   3   1  -4  218.18   16.60
   1  -3  -4  202.98   18.00
  -1   3  -4  285.87   18.30
   0   3  -4   14.30    6.20
   3   0  -4   -0.30    4.90
   0  -3  -4    6.00    7.10
  -3   0  -4    1.80    6.70
  -3   0   4    1.70    2.20
   1   3  -4 1039.50   56.69
  -1  -3  -4 1105.79   58.99
  -3   1  -4 1112.39   58.19
   3  -1  -4 1034.50   57.39
  -3   1   4 1046.70   54.89
  -2  -3  -4    8.60    6.80
   3  -2  -4   19.10    6.00
   2   3  -4   17.10    5.50
  -3   2  -4   10.10    6.30
  -3   2   4    4.30    2.90
   3  -3  -4 1366.96   71.79
  -3  -3  -4 1348.57   72.49
  -3   3  -4 1305.77   70.99
   3   3  -4 1323.57   70.19
  -3   3   4 1374.96   68.79
  -3  -3   4 1332.57   69.09
   3  -4  -4   14.90    6.70
   4   3  -4   31.20    5.70
  -3   4  -4   23.20    6.70
  -4  -3  -4    8.10    7.50
  -3   4   4   18.80    3.40
  -4  -3   4   25.70    4.90
   4   2  -4   17.90    5.40
  -4  -2  -4   30.50    8.50
  -2   4  -4    8.80    6.30
  -4  -2   4   24.90    4.10
  -2   4   4   35.00    4.90
   1  -4  -4  129.69   14.00
  -1   4  -4   85.99   10.20
  -4  -1  -4   82.29   12.10
   4   1  -4  110.09   10.80
  -4  -1   4   76.19    7.70
  -1   4   4   91.29    7.20
  -4   0  -4    4.90    6.40
   0  -4  -4   18.10    8.80
   4   0  -4    9.90    4.90
  -4   0   4    4.60    2.80
   4  -1  -4   23.80    5.90
   1   4  -4   25.40    6.20
  -1  -4  -4    8.30    7.60
  -4   1  -4   29.30    7.70
  -4   1   4   16.50    3.50
  -2  -4  -4    1.90    6.50
   2   4  -4   18.10    5.30
   4  -2  -4   -2.00    5.00
  -4   2   4   -1.70    2.20
   4  -3  -4    7.40    6.20
  -4   3  -4    6.30    6.70
   3   4  -4    1.30    5.30
  -3  -4   4   15.70    3.50
  -4   3   4   11.30    3.00
   4   4  -4   -2.20    4.00
   4  -4  -4   -5.40    5.50
  -4  -4  -4   -3.70    6.60
   4  -4   4   -0.10    3.10
  -4   4   4   -2.50    2.30
  -4  -4   4    4.20    2.80
  -5  -4  -4   61.89   11.00
   5   4  -4   77.69    9.20
  -4   5   4   56.69    6.30
  -5  -4   4   56.09    7.10
   4  -5   4   50.59    6.40
  -5  -3  -4   19.90    8.10
   3  -5  -4   11.50    7.10
  -3   5   4   23.10    3.90
   3  -5   4   23.40    4.00
   2  -5  -4   11.70    6.30
  -5  -2  -4    6.60    7.50
   5   2  -4   12.20    5.00
  -5  -2   4   10.90    3.60
  -2   5   4    9.10    3.00
  -1   5  -4  258.17   18.90
  -5  -1  -4  260.17   22.20
   1  -5  -4  280.77   21.30
   5   1  -4  338.47   19.80
  -1   5   4  286.27   17.20
  -5  -1   4  335.67   17.90
   0  -5  -4   28.10    9.50
  -5   0  -4   33.50    8.50
   0   5  -4   28.70    6.30
   5   0  -4   20.90    5.50
  -5   0   4   22.10    4.00
   0   5   4   23.10    3.80
   1   5  -4  185.08   14.20
  -5   1  -4  182.18   17.40
  -1  -5  -4  262.87   19.20
   5  -1  -4  172.08   15.10
  -5   1   4  186.88   12.30
  -2  -5  -4  101.59   13.60
   2   5  -4  115.19   10.20
   5  -2  -4  102.79   11.40
   5  -2   4  103.39    8.80
  -5   2   4   98.49    8.00
  -2  -5   4   89.29    8.80
  -3  -5  -4   63.49   10.90
   3   5  -4   70.79    7.80
   5  -3  -4   65.79    9.40
  -3  -5   4   60.99    7.20
   5  -3   4   51.19    7.00
  -5   3   4   61.59    6.40
   4   5  -4   12.20    4.70
   5  -4  -4   10.30    6.40
  -4  -5   4   12.70    3.90
  -5   4   4   11.00    3.20
   5  -5  -4  471.55   32.00
  -5  -5  -4  483.75   33.80
   5   5  -4  579.94   30.10
  -5  -5   4  613.34   30.10
   5  -5   4  469.85   28.00
  -5   5   4  513.65   29.00
   5  -6  -4   10.00    6.70
  -6  -5  -4   16.70    9.20
  -5   6   4    7.20    3.30
   5  -6   4    9.20    2.90
  -6  -5   4    2.80    3.50
   6   4  -4   17.50    5.40
   4  -6  -4    5.90    6.40
  -6  -4  -4   -0.20    8.20
  -4   6   4    5.50    3.10
  -6  -4   4    4.10    4.40
   4  -6   4    4.40    2.80
  -6  -3  -4  170.48   18.80
   6   3  -4  202.08   15.00
   3  -6  -4  158.88   16.80
  -6  -3   4  202.68   13.50
  -3   6   4  182.58   12.20
   3  -6   4  169.78   11.30
   2  -6  -4   -4.30    5.90
   6   2  -4   -1.30    4.50
  -6  -2   4    6.60    3.30
  -2   6   4    0.10    2.80
  -1   6  -4   -8.60    4.20
   6   1  -4   -8.20    4.20
   1  -6  -4   -0.80    7.00
  -6  -1  -4   -0.20    6.90
  -6  -1   4    0.10    2.50
  -1   6   4   -0.80    2.60
   0   6  -4    6.20    4.60
   0  -6  -4  -17.80    6.70
   6   0  -4    0.80    4.70
   0   6   4    0.70    2.90
  -6   0   4    0.20    2.60
   1   6  -4  128.39   11.40
  -1  -6  -4  115.49    8.70
  -1  -6  -4  113.99   14.00
   6  -1  -4   90.49   12.00
  -6   1   4  122.09    9.10
   6  -1   4   95.89    9.60
   1   6   4  121.99    9.30
   6  -2  -4    8.90    5.40
  -2  -6  -4   -6.40    6.60
   2   6  -4   11.70    4.60
   6  -2   4    2.00    3.30
  -2  -6   4    3.60    3.40
  -6   2   4    2.90    2.60
   2   6   4    5.40    3.50
   6  -3  -4    2.10    5.20
   3   6  -4   -7.60    4.30
  -3  -6  -4   24.40    8.10
  -3  -6   4    9.80    3.50
  -6   3   4    1.80    2.70
   6  -3   4    3.90    3.70
   6  -4  -4   23.60    6.60
  -4  -6  -4   15.20    8.20
   4   6  -4    1.30    4.00
   6  -4   4   -2.90    3.10
  -6   4   4   -1.00    2.70
  -4  -6   4    7.90    3.70
   5   6  -4   61.09    7.50
  -5  -6  -4   67.59   12.00
  -5  -6   4   61.19    8.20
   6  -5   4   51.79    6.80
  -6   5   4   75.99    7.50
  -6  -6  -4   -2.30    7.80
   6  -6  -4    2.00    6.60
   6   6  -4   15.40    4.70
  -6   6   4    2.00    2.80
  -6  -6   4    2.00    3.50
   6  -6   4    3.60    2.80
   6  -7  -4    4.70    6.80
   7   6  -4   38.00    6.50
  -7  -6  -4   21.00    9.90
  -7  -6   4   22.40    5.00
  -6   7   4   16.80    4.10
   5  -7  -4 1141.59   64.09
  -7  -5  -4 1145.59   65.49
   7   5  -4 1206.68   61.99
  -7  -5   4 1177.28   62.09
   5  -7   4 1126.09   59.09
  -5   7   4 1170.78   60.99
   4  -7  -4   65.09   10.10
   7   4  -4   85.79   11.30
  -7  -4  -4   45.30   11.50
  -4   7   4   46.90    7.00
   4  -7   4   60.09    5.70
   7   3  -4  434.06   26.60
   3  -7  -4  424.16   28.40
  -3   7   4  431.06   24.80
   7   3   4  416.16   25.40
   3  -7   4  432.66   22.90
  -7  -3   4  457.45   25.90
   7   2  -4   16.60    5.70
   2  -7   4   17.70    3.40
   7   2   4    9.70    5.00
  -7  -2   4   19.00    4.60
   1  -7  -4  549.95   34.30
   7   1  -4  534.25   31.70
   7   1   4  515.45   30.20
  -1   7   4  548.15   29.90
  -7  -1   4  536.55   30.10
   0   7  -4   74.29    8.10
   7   0  -4   80.99   11.00
  -7   0   4   80.29    7.90
   0  -7   4   74.29    8.20
   7   0   4   88.79    9.20
   0  -7   4   85.09    8.00
   1   7  -4  550.44   30.30
  -1  -7  -4  556.44   35.20
   7  -1  -4  511.55   32.70
  -1  -7  -4  525.15   30.10
   7  -1   4  599.54   30.90
  -1  -7   4  555.34   30.70
  -7   1   4  568.04   30.90
   1   7   4  543.05   30.70
  -2  -7  -4    4.80    2.90
  -2  -7  -4    2.90    7.10
   7  -2  -4    3.90    5.60
  -2  -7   4    7.20    3.90
  -7   2   4   -4.30    2.40
   2   7   4    3.40    3.60
   7  -2   4    3.50    3.40
  -3  -7  -4   -9.60    6.80
   7  -3  -4    3.70    5.60
   3   7  -4    0.50    4.10
  -3  -7  -4    4.20    3.00
  -3  -7   4   -1.50    3.70
  -7   3   4    0.80    2.80
   7  -3   4    1.10    3.30
   7  -4  -4   59.49    9.10
  -4  -7  -4   62.59   11.90
   4   7  -4   63.59    7.40
  -4  -7   4   68.09    8.50
  -7   4   4   53.09    6.80
   7  -4   4   61.29    7.00
   5   7  -4    4.80    3.90
   7  -5  -4   10.40    6.20
   7  -5   4    3.40    3.00
  -7   5   4    2.00    3.10
  -5  -7   4    3.30    3.90
   7  -6  -4   42.20    9.20
  -6  -7  -4   37.80   11.20
  -7   6   4   47.10    6.70
   7  -6   4   43.20    5.00
   7  -7  -4  107.09   13.80
  -7  -7  -4  101.59   14.70
   7   7  -4   76.69   10.30
   7  -7   4   90.99    7.00
  -7  -7   4  104.49   10.20
  -7   7   4   92.29    8.80
   7  -8  -4   12.70    7.20
   8   7  -4   10.80    5.00
   8   7   4   -5.30    4.10
  -7   8   4    5.40    3.40
  -8  -7   4    7.80    4.20
   7  -8   4   -0.50    2.50
   6  -8  -4    7.70    7.20
   8   6  -4    7.40    4.50
   8   6   4    0.40    4.30
  -8  -6   4    5.30    3.80
  -6   8   4   10.30    3.40
   5  -8  -4   17.80    8.00
  -8  -5   4   17.10    5.70
   8   5   4   16.90    5.10
   8   5   4   13.30    3.40
  -5   8   4   14.20    4.10
   4  -8  -4   12.40    7.20
   8   4  -4   18.80    6.10
   4  -8   4   10.10    2.20
  -8  -4   4   10.80    4.90
  -4   8   4   17.10    4.20
   8   4   4    9.80    4.70
   8   4   4   10.90    3.20
   8   3  -4  108.29   12.00
   3  -8  -4   70.79   10.60
   3  -8   4   63.19    7.00
  -3   8   4   63.09    8.10
  -8  -3   4   79.99    8.80
   8   3   4   75.89    9.00
   2  -8  -4    4.60    7.20
   8   2  -4    2.20    5.10
  -2   8   4   -8.50    3.30
   8   2   4   -2.40    3.80
   2  -8   4    2.80    3.60
  -8  -2   4    7.80    3.70
   2  -8   4    0.60    2.90
   1  -8  -4   27.10   10.60
   8   1  -4   31.10    6.80
  -1   8   4   20.80    5.10
   1  -8   4   24.50    6.40
   1  -8   4   17.70    4.10
   0  -8  -4   -7.30    8.40
   8   0  -4   12.60    5.90
  -8   0   4    7.40    3.30
   8   0   4    0.80    4.00
   0  -8   4   16.40    4.80
   0   8   4    7.60    3.60
  -1  -8  -4   90.99    9.00
  -1  -8  -4   61.19   12.00
   8  -1  -4   56.69    9.70
  -1  -8   4  104.49    9.20
   1   8   4   93.09    9.40
  -8   1   4   82.49    8.40
   8  -1   4  112.79    9.60
  -1  -8   4   90.39    8.90
   8  -2  -4   -3.00    5.00
  -2  -8  -4    2.20    3.00
  -2  -8  -4   -7.20    6.70
   2   8   4   -0.70    4.00
  -2  -8   4    6.00    3.70
   8  -2   4   16.60    4.30
  -3  -8  -4   17.60    8.20
  -3  -8  -4   17.10    5.20
  -3  -8   4   15.70    4.80
   8  -3   4   32.20    4.70
  -4  -8  -4   -2.00    8.00
   8  -4  -4   -7.90    5.00
  -4  -8   4    3.30    3.50
  -5  -8  -4    1.90    8.10
   8  -5  -4    9.00    6.30
  -5  -8   4   12.10    4.40
   8  -5   4    8.50    3.30
  -8   5   4    3.20    3.40
   8  -6  -4   -0.20    5.30
   6   8  -4    0.20    3.90
  -6  -8  -4   -7.10    8.30
  -8   6   4   -0.80    3.00
   8  -6   4    6.80    2.60
  -6  -8   4   -0.20    3.60
   8  -7  -4    2.10    5.70
   7   8  -4    4.10    3.80
  -7  -8  -4    7.80    9.10
  -7  -8   4   -0.80    3.50
  -8   7   4   -1.60    2.90
   8  -7   4    1.30    2.10
   8  -8  -4    5.00    6.60
   8   8  -4   10.00    4.40
   8   8   4   -7.10    4.70
  -8  -8   4    1.40    3.90
  -8   8   4    2.40    2.90
   8  -8   4   -0.30    2.10
   9   8  -4    5.80    4.40
  -8   9   4   15.00    4.20
   8  -9   4    0.60    2.30
   9   8   4   -5.20    4.20
  -9  -8   4    4.30    3.70
   7  -9  -4   21.80    8.10
   9   7  -4   26.40    6.20
  -7   9   4   23.60    5.20
  -9  -7   4   28.40    6.40
   7  -9   4   20.20    4.20
   9   7   4   16.70    5.80
   9   6  -4   15.60    5.70
  -6   9   4   24.00    4.70
  -9  -6   4   14.20    5.50
   9   6   4   14.80    5.20
   5  -9  -4  334.47   24.90
   9   5  -4  329.27   21.90
   5  -9   4  317.27   19.00
  -9  -5   4  364.86   22.30
  -5   9   4  331.97   20.50
   9   5   4  325.57   19.90
   9   5   4  304.87   21.10
   4  -9  -4   -1.70    6.70
   9   4  -4    6.80    5.80
   4  -9   4   15.40    3.30
   9   4   4   12.70    4.90
   9   4   4   15.00    3.70
  -9  -4   4   12.50    5.10
  -4   9   4    9.70    4.10
   3  -9  -4   80.79   12.00
  -9  -3   4   94.19    9.70
   3  -9   4   87.19    8.20
   3  -9   4   74.89    8.10
   9   3   4   95.49    9.50
  -3   9   4   97.19    9.00
   2  -9  -4   -2.10    7.20
   9   2  -4    0.60    5.50
  -2   9   4    3.10    3.60
  -9  -2   4    1.60    3.50
   9   2   4    5.40    4.00
   2  -9   4   -1.50    3.10
   2  -9   4    1.70    3.80
   9   1  -4  331.87   22.90
   1  -9   4  322.57   19.90
   1  -9   4  324.67   21.00
  -9  -1   4  351.56   21.00
   9   1   4  338.37   20.60
   0  -9  -4   -9.90    8.60
   9   0  -4   -9.80    5.30
   0  -9   4    9.00    4.20
   0  -9   4   14.20    4.70
   9   0   4    3.10    4.00
   0   9   4    2.50    3.80
  -9   0   4    6.90    3.50
  -1  -9  -4  419.96   30.30
   9  -1  -4  381.06   27.30
   9  -1   4  409.76   24.70
  -1  -9   4  449.76   25.10
  -1  -9   4  449.16   25.50
  -9   1   4  443.86   25.50
   1   9   4  438.66   25.90
  -2  -9  -4   31.20    9.90
   9  -2  -4   29.10    7.40
  -2  -9   4   32.50    5.70
   2   9   4   42.00    6.90
  -9   2   4   31.50    5.60
   9  -2   4   29.40    5.30
   9  -3  -4  121.09   14.20
  -3  -9  -4  140.69   17.60
  -9   3   4  151.58   11.50
   9  -3   4  153.88   11.10
   9  -4  -4   64.39    9.90
  -4  -9   4   55.49    7.90
  -9   4   4   52.79    7.30
   9  -4   4   61.59    7.20
  -5  -9  -4  604.94   38.60
   9  -5  -4  552.34   35.60
   9  -5   4  577.64   31.70
  -5  -9   4  622.24   34.50
  -9   5   4  593.74   33.30
  -6  -9  -4   18.90   10.10
   9  -6  -4   24.10    7.60
  -9   6   4   25.40    5.10
   9  -6   4   27.20    4.00
  -6  -9   4   29.50    6.40
   9  -7  -4  108.69   14.30
  -7  -9  -4  146.69   18.80
   9  -7   4  122.79    8.70
  -9   7   4  130.09   10.90
  -7  -9   4  120.79   12.10
   9  -8  -4    8.60    6.40
  -9   8   4   -2.20    3.00
  -8  -9   4    3.10    4.10
   9  -8   4    0.40    2.20
   8   9   4   -7.60    4.30
   9  -9  -4    2.40    6.90
  -9   9   4    1.40    3.20
   9   9   4   -4.80    4.50
   9  -9   4    3.00    2.50
  -9  -9   4   -1.40    3.60
   9 -10  -4    7.80    7.80
  -9  10   4   11.50    4.60
 -10  -9   4   12.70    5.10
  10   9   4    8.30    5.40
   8 -10  -4   -5.00    6.50
  10   8  -4    5.00    4.70
 -10  -8   4   -2.60    3.80
  -8  10   4   -1.00    3.20
  10   8   4   -1.50    4.60
   7 -10  -4   -3.40    6.70
  10   7  -4    0.40    4.50
  10   7   4    7.70    5.20
 -10  -7   4   -0.10    4.30
  -7  10   4    2.80    3.40
   6 -10  -4   16.30    7.90
  10   6  -4   12.20    6.00
 -10  -6   4   16.70    6.50
  10   6   4   16.70    5.70
  -6  10   4   18.00    4.80
   5 -10  -4   -6.40    6.20
  10   5  -4    7.30    5.50
  10   5   4    3.70    4.60
 -10  -5   4   11.50    4.70
  -5  10   4    4.00    3.40
   4 -10  -4   -2.20    6.50
  10   4  -4   -6.30    4.90
 -10  -4   4    2.30    3.60
  10   4   4    0.70    3.70
  -4  10   4    2.10    3.20
  10   3  -4   -3.00    5.20
   3 -10  -4    5.80    6.70
  10   3   4   -4.20    2.20
   3 -10   4   -4.40    2.80
 -10  -3   4   -2.60    3.10
  10   3   4   -1.10    3.60
  -3  10   4    3.50    3.50
  10   2  -4   -2.70    5.00
  10   2   4   -2.30    3.50
  -2  10   4    7.60    3.80
 -10  -2   4   -3.20    3.00
  10   2   4   -1.10    2.40
   2 -10   4   -4.20    5.30
  10   1  -4   28.90    7.80
   1 -10  -4   29.30   10.30
   1 -10   4   15.00    5.40
 -10  -1   4   20.90    5.00
   1 -10   4   25.10    6.20
  10   1   4   21.50    5.20
  -1  10   4   19.30    5.10
  10   0  -4    2.30    5.50
   0 -10  -4    4.70    7.50
  10   0   4    4.90    4.00
   0 -10   4    2.00    4.60
 -10   0   4   -1.10    3.30
   0  10   4   13.40    4.40
  10  -1  -4   -2.80    5.60
  -1 -10  -4    6.30    7.80
   1  10   4   -0.80    4.30
  10  -1   4   -4.70    3.40
 -10   1   4    0.60    3.10
  10  -2  -4   -2.60    6.10
  -2 -10  -4   -6.70    7.00
 -10   2   4    0.90    3.20
  10  -2   4    1.80    3.70
   2  10   4   -3.00    4.00
  -2 -10   4   -1.50    3.30
  -3 -10  -4   47.10   10.60
  10  -3  -4   39.40    8.70
  -3 -10   4   44.50    7.60
 -10   3   4   48.80    7.00
  10  -3   4   51.49    6.40
  -4 -10  -4   11.60    8.40
  10  -4  -4    1.60    5.70
  10  -4   4    2.50    3.10
  -4 -10   4   -0.80    3.70
 -10   4   4    1.70    3.30
  10  -5  -4   -2.80    5.80
  -5 -10  -4    9.90    8.50
  -5 -10   4    8.70    4.70
  10  -5   4    3.60    3.10
 -10   5   4    2.20    3.10
  -6 -10  -4  -11.30    8.30
  10  -6  -4   -0.70    6.40
  10  -6   4   -0.10    2.60
  -6 -10   4    2.00    3.90
 -10   6   4    2.40    3.40
  10  -7  -4   12.20    7.50
  -7 -10  -4   15.40   10.00
  10  -7   4   13.70    3.30
 -10   7   4    7.90    4.10
  -7 -10   4   16.00    5.60
  10  -8  -4   12.80    7.30
  10  -8   4    8.20    3.00
  -8 -10   4    7.90    4.80
   8  10   4    0.80    5.20
 -10   8   4   13.60    4.70
  10  -9  -4   -1.50    6.70
 -10   9   4   -0.30    3.20
   9  10   4   -6.50    4.80
  10  -9   4   -1.20    2.40
  -9 -10   4    1.10    4.20
  10 -10  -4    5.70    7.30
 -10 -10   4    5.20    4.70
 -10  10   4    1.20    3.60
  10  10   4   -0.20    5.40
  10 -11  -4    1.70    7.80
 -11 -10   4    2.60    4.80
  11  10   4    2.10    5.30
 -10  11   4    2.50    3.80
   9 -11  -4   34.60    9.70
  -9  11   4   21.60    5.50
 -11  -9   4   24.80    7.00
  11   9   4   22.10    6.50
  11   8  -4   -0.20    5.00
   8 -11  -4   10.10    7.90
  11   8   4    9.70    5.40
 -11  -8   4    8.80    5.50
  -8  11   4    9.80    4.60
  11   7  -4   86.79   12.10
   7 -11  -4  131.39   16.40
 -11  -7   4  150.98   14.20
  -7  11   4  123.99   11.40
  11   7   4  128.89   12.30
   6 -11  -4   21.40    8.80
  11   6  -4   30.00    7.90
 -11  -6   4   48.20    8.90
  -6  11   4   34.50    6.10
  11   6   4   29.70    6.40
  11   5  -4   98.69   13.90
   5 -11  -4  113.39   14.80
 -11  -5   4  142.89   12.90
  11   5   4  139.29   12.40
  -5  11   4  139.69   11.80
  11   4  -4    1.40    6.10
   4 -11  -4    3.90    7.40
 -11  -4   4   12.30    4.40
  -4  11   4   19.20    5.20
  11   4   4    9.00    4.80
   3 -11  -4   -7.00    7.00
  11   3  -4    3.60    6.30
 -11  -3   4   10.50    4.40
   3 -11   4   12.50    4.30
  11   3   4   10.20    4.60
  -3  11   4   10.00    4.60
   2 -11  -4   21.90    9.50
  11   2  -4   15.30    6.90
   2 -11   4   19.80    5.60
 -11  -2   4   28.10    6.00
  11   2   4   21.00    5.40
  -2  11   4   20.30    5.10
  11   1  -4   -1.90    5.70
   1 -11  -4    3.50    7.40
  11   1   4    1.50    3.60
   1 -11   4    3.80    4.90
 -11  -1   4    3.60    3.40
  -1  11   4    4.30    4.00
  11   0  -4    9.30    6.60
   0 -11  -4   28.50    8.50
  11   0   4   10.20    4.20
   0  11   4   16.60    5.10
  11   0   4   17.40    4.10
 -11   0   4   11.70    4.20
   0 -11   4   10.10    5.90
  -1 -11  -4   -6.00    6.70
  11  -1  -4   -2.10    5.40
  11  -1   4   -1.90    3.60
   1  11   4    1.40    4.20
 -11   1   4   -1.70    2.80
  -1 -11   4   -2.00    3.80
  -2 -11  -4    3.90    7.40
  11  -2  -4   -4.00    5.50
  -2 -11   4    1.20    3.70
  11  -2   4   -3.40    3.20
 -11   2   4    0.80    3.10
  11  -3  -4   40.50    8.60
  -3 -11  -4   44.60   10.60
 -11   3   4   29.40    5.70
  -3 -11   4   30.30    6.40
  11  -3   4   34.50    5.40
  11  -4  -4   -5.30    5.70
  -4 -11  -4   33.70    9.80
  -4 -11   4    0.60    4.70
  11  -4   4    3.70    3.20
 -11   4   4   -0.50    3.30
  11  -5  -4  336.37   24.50
  -5 -11  -4  357.46   27.80
  -5 -11   4  336.17   23.00
  11  -5   4  339.37   19.90
 -11   5   4  349.77   21.70
  11  -6  -4   10.20    6.70
  -6 -11  -4   13.90    9.80
  11  -6   4    5.30    3.00
 -11   6   4    3.60    3.20
  -6 -11   4    0.80    4.10
  11  -7  -4  105.99   14.40
  -7 -11  -4  110.59   16.70
 -11   7   4  110.89   10.60
  -7 -11   4  141.59   13.40
  11  -7   4  116.29    9.10
  11  -8  -4   26.90    9.10
   8  11   4   26.30    7.40
 -11   8   4   30.50    6.00
  -8 -11   4   34.80    7.60
  11  -8   4   23.10    4.10
  11  -9  -4   52.29   11.00
   9  11   4   52.29    9.00
 -11   9   4   52.59    8.10
  11  -9   4   54.39    6.30
  -9 -11   4   51.59    8.90
  11 -10  -4   16.70    8.50
 -11  10   4   13.50    4.90
  10  11   4   17.70    6.60
 -10 -11   4    7.60    5.30
  11 -11  -4  175.18   19.30
  11  11   4  183.58   16.00
 -11  11   4  152.58   14.10
  11 -12  -4   10.00    8.90
  12  11   4   10.70    6.10
  10 -12  -4    1.50    7.80
 -12 -10   4    0.20    6.00
  12  10   4   21.00    6.70
 -10  12   4    5.10    4.40
   9 -12  -4   -3.50    7.60
  -9  12   4    6.10    4.20
  12   9   4   25.30    6.90
 -12  -9   4    9.00    5.60
   8 -12  -4    0.10    7.50
  12   8  -4   -5.80    4.10
 -12  -8   4   -0.90    5.30
  12   8   4   16.90    6.30
  -8  12   4    7.50    4.30
  12   7  -4   -1.30    4.70
   7 -12  -4    1.50    7.60
  12   7   4   13.30    5.80
  -7  12   4    6.90    4.60
 -12  -7   4   10.30    6.20
  12   6  -4   19.40    5.80
   6 -12  -4    4.90    7.10
 -12  -6   4    4.60    4.80
  12   6   4    7.70    5.10
  -6  12   4    6.50    4.20
  12   5  -4   11.30    7.90
   5 -12  -4   21.80    8.60
  -5  12   4   25.00    6.00
  12   5   4   42.60    7.20
 -12  -5   4   22.90    6.00
  12   4  -4   -2.20    6.00
   4 -12  -4    2.50    7.20
  12   4   4   11.80    4.90
 -12  -4   4    3.80    3.80
  -4  12   4   34.10    6.50
   3 -12  -4   -6.10    7.10
  12   3  -4   -4.50    5.60
 -12  -3   4   -1.50    3.20
  12   3   4    6.10    3.90
  -3  12   4   -4.40    3.50
   3 -12   4    2.00    3.50
   2 -12  -4   -1.30    7.70
  12   2  -4   -5.30    5.40
 -12  -2   4   -2.70    3.10
  12   2   4   -1.30    3.60
   2 -12   4   -6.80    3.30
  -2  12   4    0.50    4.00
  12   1  -4    0.50    5.70
   1 -12  -4    0.00    7.90
  12   1   4    2.40    3.80
 -12  -1   4   -0.30    3.20
  -1  12   4    0.30    4.10
   1 -12   4   -3.30    4.40
  12   0  -4   -7.40    5.30
   0 -12  -4   -0.70    7.50
  12   0   4   -0.40    3.70
 -12   0   4    2.80    3.60
   0  12   4    5.00    4.50
   0 -12   4   -2.90    4.80
  12  -1  -4   -9.70    5.20
  -1 -12  -4   42.60    9.80
  -1 -12   4    9.40    4.60
 -12   1   4   -0.70    3.20
  12  -1   4   -2.20    3.60
  -2 -12  -4    5.40    8.30
  12  -2  -4  -14.70    5.50
  12  -2   4   -7.20    3.40
 -12   2   4   -1.00    3.10
  -2 -12   4    5.90    4.20
  -3 -12  -4  -12.60    7.60
  12  -3  -4   -8.40    5.40
 -12   3   4   -2.50    2.80
  -3 -12   4   -1.30    3.70
  12  -3   4    0.40    3.30
  -4 -12  -4   -8.20    8.60
  12  -4  -4   -1.10    6.30
  12  -4   4    0.80    3.10
  -4 -12   4   -1.80    4.30
 -12   4   4   -1.90    3.00
  -5 -12  -4  -15.40    8.50
  12  -5  -4    5.70    6.60
  12  -5   4   -2.50    2.90
  -5 -12   4   -1.70    4.00
 -12   5   4   -0.20    3.10
  12  -6  -4   -1.30    6.50
  -6 -12  -4    1.00    9.70
 -12   6   4    0.50    3.30
  -6 -12   4    3.00    4.90
  12  -6   4   -1.40    2.80
  -7 -12  -4    6.10    9.80
  12  -7  -4   15.60    7.50
  12  -7   4    2.10    3.10
 -12   7   4    2.10    3.30
  -7 -12   4    5.80    4.80
  12  -8  -4    6.70    7.20
  -8 -12   4    2.40    4.50
 -12   8   4    4.20    3.70
  12  -8   4    2.50    2.90
   8  12   4   -5.10    5.20
  12  -9  -4    8.40    7.80
 -12   9   4    1.30    3.90
   9  12   4   -3.80    5.50
  -9 -12   4    1.30    5.30
  12  -9   4    3.00    3.30
  12 -10  -4   -1.00    7.50
 -12  10   4    2.00    3.90
  10  12   4    0.60    6.00
  12 -11  -4    2.90    8.20
  11  12   4    7.20    6.30
  12 -12  -4   -1.10    8.30
  12  12   4   13.10    6.40
  12 -13  -4   -4.00    8.20
  13  12   4    5.10    6.20
  11 -13  -4   20.80    9.80
  13  11   4    8.70    6.20
  10 -13  -4   -2.60    8.40
  13  10   4   -3.00    5.50
   9 -13  -4    4.00    9.00
  13   9   4   12.30    6.60
  -9  13   4    9.00    4.50
 -13  -9   4   12.60    8.30
  13   8  -4   -6.10    4.70
   8 -13  -4   -1.00    8.40
 -13  -8   4    6.00    5.80
  -8  13   4    5.40    4.60
  13   8   4    5.80    5.40
   7 -13  -4  217.18   21.90
 -13  -7   4  254.57   19.50
  -7  13   4  252.97   18.50
  13   7   4  249.08   18.00
   6 -13  -4   -1.30    7.10
  13   6  -4    4.00    5.50
 -13  -6   4    2.90    4.50
  -6  13   4    5.30    4.50
  13   6   4    8.00    4.90
  13   5  -4  291.87   23.20
   5 -13  -4  337.57   26.30
  13   5   4  351.46   21.90
 -13  -5   4  343.17   23.10
  -5  13   4  352.96   23.10
   4 -13  -4   -6.80    7.40
  13   4  -4    8.50    6.60
 -13  -4   4    3.90    4.30
   4 -13   4    3.90    5.20
  13   4   4    3.90    4.70
  -4  13   4    2.50    4.40
   3 -13  -4   -5.00    7.90
  13   3  -4   15.70    6.60
   3 -13   4    0.20    4.10
  -3  13   4    4.40    4.70
 -13  -3   4   -1.90    3.40
  13   3   4    2.50    4.40
   2 -13  -4    4.70    8.00
  13   2  -4    6.10    6.50
   2 -13   4    4.40    5.00
  -2  13   4   -0.30    4.30
 -13  -2   4    2.00    3.50
  13   2   4    6.30    4.60
  13   1  -4  134.89   16.30
   1 -13  -4  187.38   20.10
   1 -13   4  154.98   14.70
  -1  13   4  179.78   15.20
  13   1   4  166.68   13.40
 -13  -1   4  178.88   14.10
   0 -13  -4    8.70    8.40
  13   0  -4   -7.40    6.50
   0  13   4   11.40    5.90
  13   0   4    3.50    4.50
   0 -13   4    4.90    6.20
 -13   0   4   11.70    4.60
  13  -1  -4   44.50   10.20
  -1 -13  -4   62.79   12.50
 -13   1   4   70.49    8.70
   1  13   4   71.89   10.10
  13  -1   4   50.19    7.20
  -1 -13   4   76.19   10.80
  13  -2  -4   -3.90    6.40
  -2 -13  -4    6.00    8.60
  -2 -13   4    5.70    4.80
 -13   2   4    0.70    3.30
  13  -2   4    5.70    4.00
  -3 -13  -4   16.70   10.30
  13  -3  -4    9.20    7.60
  -3 -13   4   27.30    6.20
  13  -3   4   18.10    4.70
 -13   3   4   13.40    4.70
  -4 -13  -4   30.50   11.80
  13  -4  -4   22.20    8.60
  13  -4   4   36.40    5.50
 -13   4   4   29.20    5.90
  -4 -13   4   39.30    7.90
  -5 -13  -4   36.00   13.10
  13  -5  -4   45.90    9.80
  13  -5   4   52.39    7.30
 -13   5   4   59.59    8.10
  -5 -13   4   61.49    9.30
  -6 -13  -4   10.90   10.70
  13  -6  -4   26.30    8.70
  13  -6   4   26.60    4.90
 -13   6   4   18.80    5.10
  -6 -13   4   20.10    6.80
  -7 -13  -4   17.70   10.70
  13  -7  -4   11.60    7.60
 -13   7   4   11.90    4.70
  13  -7   4   11.30    3.90
  13  -8  -4    7.80    8.40
 -13   8   4    4.60    4.00
  13  -8   4    4.10    3.40
   8  13   4    9.00    6.60
  13  -9  -4   -1.10    7.60
   9  13   4   10.60    6.60
 -13   9   4    8.50    4.70
  13  -9   4    7.50    4.00
  13 -10  -4   -2.30    7.50
  10  13   4    1.40    6.00
  13 -11  -4   -0.60    8.30
  11  13   4    8.10    6.40
  13 -12  -4   -5.00    8.10
  12  13   4   12.00    6.80
  13 -13  -4    0.70    9.10
  13  13   4    2.50    6.10
  13 -14  -4   -5.20    9.00
  14  13   4   -4.40    5.50
  12 -14  -4    0.00    8.30
  14  12   4   -3.70    5.40
  11 -14  -4   11.50    9.20
  14  11   4    2.60    6.10
  10 -14  -4    3.50    8.60
  14  10   4   -6.60    4.90
   9 -14  -4   -5.00    7.90
  14   9   4   -0.90    5.30
  14   8  -4   -1.10    5.40
   8 -14  -4   -4.50    8.30
  14   8   4    5.90    5.40
 -14  -8   4   14.30    7.80
  -8  14   4    8.00    5.20
  14   7  -4    5.10    6.00
   7 -14  -4    5.00    8.10
  14   7   4    9.60    5.90
 -14  -7   4   11.10    5.90
  -7  14   4   12.80    5.70
   6 -14  -4   -5.80    7.60
  14   6  -4   25.20    7.30
  14   6   4   -2.90    4.70
  -6  14   4   -0.90    4.50
 -14  -6   4    1.10    4.50
   5 -14  -4    1.50    7.70
  14   5  -4    3.20    5.80
  14   5   4   -0.50    4.60
  -5  14   4   -0.50    4.30
 -14  -5   4    0.30    4.20
  14   4  -4    0.90    6.10
   4 -14  -4   -4.80    7.50
  -4  14   4   -0.70    4.00
  14   4   4    1.30    4.50
 -14  -4   4   -1.60    3.80
  14   3  -4    2.20    6.20
   3 -14  -4    8.20    9.30
  14   3   4   10.90    5.10
  -3  14   4    5.60    5.00
 -14  -3   4    7.10    4.80
  14   2  -4   -2.00    6.30
   2 -14  -4    1.10    8.60
  14   2   4   -5.50    3.90
 -14  -2   4   -0.10    3.70
  -2  14   4   -3.70    4.30
   1 -14  -4    5.70    8.50
  14   1  -4   -5.80    6.20
 -14  -1   4    2.40    4.10
  14   1   4    0.60    4.20
  -1  14   4    5.10    5.80
  14   0  -4  -14.50    6.30
   0 -14  -4    9.30    8.60
   0  14   4   -0.50    4.70
  14   0   4    2.00    4.10
 -14   0   4   -0.10    3.80
  14  -1  -4    1.90    7.30
  -1 -14  -4    7.30    8.40
 -14   1   4    0.60    3.50
  14  -1   4   -1.20    4.10
  -3 -14  -4    7.70    9.80
  14  -3  -4   -0.50    7.00
  14  -3   4    5.20    4.30
 -14   3   4    6.30    3.80
  14  -4  -4   -1.70    6.70
  -4 -14  -4   -3.90    8.70
 -14   4   4   -0.10    3.50
  14  -4   4    6.20    4.00
  14  -5  -4    8.80    7.70
  -5 -14  -4    1.30   10.10
  14  -5   4    8.30    4.10
 -14   5   4    4.70    4.00
  14  -6  -4   -5.90    6.90
  -6 -14  -4   -3.70   10.10
 -14   6   4    1.00    3.80
  14  -6   4   -0.30    3.30
  14  -7  -4    3.10    7.90
 -14   7   4    2.90    4.20
  14  -7   4    0.50    3.30
  14  -8  -4    2.50    7.70
   8  14   4   -0.30    5.70
  14  -8   4    1.30    3.40
  14  -9  -4   -2.20    7.70
   9  14   4   -1.80    5.60
  14  -9   4    5.50    3.90
  14 -10  -4   -3.30    8.10
  10  14   4    6.50    6.50
  14 -11  -4   -4.20    8.20
  11  14   4    8.20    6.70
  14 -12  -4    1.70    8.70
  12  14   4    5.80    6.50
  14 -13  -4  -11.20    8.20
  13  14   4    3.90    6.40
  14 -14  -4  -11.70    8.40
  14  14   4   -4.70    5.90
  14 -15  -4   -2.10    9.40
  15  14   4   -1.10    6.10
  13 -15  -4   42.30   12.70
  15  13   4   41.50    9.20
  12 -15  -4   10.70   10.40
  15  12   4    8.80    6.50
  11 -15  -4   64.69   14.10
  15  11   4   65.49   10.10
  10 -15  -4    2.60    8.50
  15  10   4    3.60    5.90
   9 -15  -4    7.70    8.70
  15   9   4    8.10    6.20
   8 -15  -4   17.60    9.70
  15   8   4   26.60    7.00
  15   7  -4    6.60    6.70
   7 -15  -4   29.90   10.60
  15   7   4   24.10    6.80
   6 -15  -4   -6.30    7.70
  15   6  -4   -2.20    6.00
  -6  15   4    3.50    5.50
 -15  -6   4    7.60    5.20
  15   6   4    5.00    5.40
  15   5  -4    7.10    6.80
   5 -15  -4   16.70    9.40
 -15  -5   4   17.70    5.90
  15   5   4   17.40    6.50
  -5  15   4   24.00    7.10
  15   4  -4   -4.30    5.90
   4 -15  -4    1.60    8.50
  15   4   4   -0.80    4.80
 -15  -4   4    0.00    4.00
  -4  15   4   -2.50    4.20
   3 -15  -4  -10.40    7.50
  15   3  -4   -8.90    5.90
 -15  -3   4   -0.90    3.70
  15   3   4   -1.60    4.90
  -3  15   4    2.40    4.80
   2 -15  -4   -2.90    8.50
  15   2  -4   -2.30    6.50
  15   2   4    2.00    4.70
 -15  -2   4   -2.00    3.80
  -2  15   4    1.60    5.40
   1 -15  -4   96.89   15.60
  15   1  -4  117.79   15.10
  15   1   4  112.29   11.50
  -1  15   4  113.69   14.30
 -15  -1   4  119.69   12.30
  15   0  -4    3.30    7.60
   0 -15  -4   14.10    9.30
 -15   0   4    8.90    5.00
   0  15   4    1.10    5.00
  15   0   4   -2.50    4.10
  -1 -15  -4   42.30   11.90
  15  -1  -4   36.80    9.60
 -15   1   4   32.90    7.00
  15  -1   4   33.90    6.60
  15  -2  -4   -5.60    7.20
  -2 -15  -4   -3.50    9.30
 -15   2   4    1.10    3.80
  15  -2   4   -3.50    4.00
  -3 -15  -4  110.69   17.00
  15  -3  -4   98.49   14.30
 -15   3   4  108.49   11.20
  15  -3   4  106.39   10.60
  -4 -15  -4   25.30   11.50
  15  -4  -4   30.90    9.60
 -15   4   4   20.20    6.00
  15  -4   4   33.40    5.90
  -5 -15  -4  365.06   30.60
  15  -5  -4  366.66   27.80
  15  -5   4  396.36   22.50
 -15   5   4  346.87   24.80
  -6 -15  -4    3.00   10.70
  15  -6  -4   -1.50    7.60
  15  -6   4    2.70    3.80
  15  -7  -4   24.50    9.60
  15  -7   4   24.60    5.10
  15  -8  -4   13.80    9.10
  15  -8   4   15.90    4.60
   8  15   4   21.60    7.30
  15  -9  -4   78.09   14.70
   9  15   4  101.79   12.90
  15 -10  -4    1.60    8.50
  10  15   4    5.80    6.60
  15 -11  -4   17.60   10.30
  11  15   4   25.90    8.30
  15 -12  -4   -0.90    9.20
  12  15   4    4.20    6.70
  15 -13  -4    1.20    9.50
  13  15   4   12.20    7.60
  15 -14  -4   -2.20    9.40
  14  15   4   -2.10    6.00
  13 -16  -4    4.60   10.00
  16  13   4  -10.20    5.80
  12 -16  -4  -11.80    8.70
  16  12   4   -1.60    5.90
  11 -16  -4    9.60    9.80
  16  11   4    1.10    6.40
  10 -16  -4   -6.00    8.60
  16  10   4    6.40    6.20
   9 -16  -4    3.10    8.80
  16   9   4   -0.30    5.80
   8 -16  -4   11.80    9.70
  16   8  -4   -5.90    6.00
  16   8   4    6.00    6.00
   7 -16  -4   19.50   10.20
  16   7  -4    0.90    7.50
  16   7   4   19.30    7.00
   6 -16  -4    2.80    8.80
  16   6  -4    0.20    6.90
  16   6   4    4.00    5.40
   5 -16  -4   10.80    9.20
  16   5  -4    0.80    6.40
  16   5   4    0.60    5.00
   4 -16  -4   -4.30    7.70
  16   4  -4   -2.70    6.40
  16   4   4   -0.20    5.00
  16   3  -4   15.60    7.90
   3 -16  -4   -0.40    8.60
 -16  -3   4   11.40    5.80
  16   3   4   21.00    6.20
   2 -16  -4   -8.10    8.60
  16   2  -4    1.50    7.20
 -16  -2   4   -1.40    4.30
  16   2   4   -2.90    4.60
  16   1  -4   -3.10    7.00
   1 -16  -4   -4.90    8.80
  16   1   4    0.00    4.50
 -16  -1   4   -3.10    4.10
   0 -16  -4   -2.20    8.90
  16   0  -4   -1.30    7.20
 -16   0   4   -0.80    4.20
  16   0   4   -2.30    4.40
  16  -1  -4   -2.90    7.50
  -1 -16  -4    0.90    9.40
 -16   1   4   -2.10    5.90
  16  -1   4   -0.40    4.20
  -2 -16  -4    1.30    9.50
  16  -2  -4    5.00    7.50
  16  -2   4    3.70    4.70
  16  -3  -4   -4.80    6.80
  -3 -16  -4   -6.20    8.90
  16  -3   4   -1.80    4.20
  16  -4  -4   -0.20    7.50
  -4 -16  -4   -2.60    9.60
  16  -4   4    5.80    4.60
  -5 -16  -4    3.40   10.10
  16  -5  -4   -5.20    7.60
  16  -5   4   -1.50    3.90
  16  -6  -4    4.90    8.20
  -6 -16  -4   33.20   11.40
  16  -6   4    1.10    4.10
  16  -7  -4    0.90    8.10
   7  16   4   13.40    6.70
  16  -7   4   -0.50    4.10
  16  -8  -4   -2.40    7.60
  16  -8   4    2.20    4.00
   8  16   4   12.00    6.70
  16  -9  -4    8.40    9.40
   9  16   4    7.60    7.10
  16 -10  -4   -1.70    8.90
  10  16   4    0.40    6.40
  16 -11  -4   -2.90    8.90
  11  16   4    3.60    7.00
  16 -12  -4   -0.50    8.60
  12  16   4   -1.00    6.50
  16 -13  -4    3.50    9.70
  13  16   4    1.20    6.40
  11 -17  -4   29.10   11.80
  17  11   4   28.70    8.20
  10 -17  -4    4.30    9.40
  17  10   4    7.30    6.80
   9 -17  -4   49.70   13.20
  17   9   4   61.49   10.20
   8 -17  -4   34.50   11.60
  17   8  -4   15.60    8.00
  17   8   4   18.80    7.40
   7 -17  -4  265.47   25.40
  17   7  -4  241.28   22.00
  17   7   4  274.27   20.20
   6 -17  -4   -1.00    8.70
  17   6  -4   -2.10    7.10
  17   6   4    4.50    5.60
  17   5  -4   -4.50    6.80
   5 -17  -4    7.80    9.70
  17   5   4   10.80    6.20
  17   4  -4    3.60    7.20
   4 -17  -4    0.10    9.40
  17   4   4   10.90    6.00
  17   3  -4   55.99   11.10
   3 -17  -4   54.39   13.70
  17   3   4   53.39    8.50
  17   2  -4    8.90    7.30
   2 -17  -4  -18.80    8.30
  17   2   4    6.20    5.30
  17   1  -4   -3.10    7.00
   1 -17  -4   -6.10    9.40
  17   1   4   -3.20    4.40
   0 -17  -4  -12.90    9.10
  17   0  -4   -0.10    7.20
  17   0   4   -7.40    4.10
  17  -1  -4    0.90    7.60
  -1 -17  -4   -4.20    9.90
  17  -1   4   -1.60    4.40
  -2 -17  -4   -4.50   10.20
  17  -2  -4    6.20    8.00
  17  -2   4    3.80    4.80
  -3 -17  -4   -2.90   10.50
  17  -3  -4   11.90    8.50
  17  -3   4   14.10    5.50
  -4 -17  -4   -8.90   10.50
  17  -4  -4    4.30    8.50
  17  -4   4    5.10    4.50
  17  -5  -4   33.40   10.60
  -5 -17  -4   32.70   13.10
  17  -5   4   32.90    6.40
  17  -6  -4   -1.30    8.10
  17  -6   4   -1.80    4.10
  17  -7  -4    1.20    8.50
   7  17   4    3.60    6.50
  17  -7   4   -1.70    4.10
  17  -8  -4    1.90    8.70
  17  -8   4    1.20    4.40
   8  17   4    6.80    6.90
  17  -9  -4   71.49   15.10
   9  17   4   94.19   12.90
  17 -10  -4   16.10   10.30
  10  17   4    5.90    7.40
  17 -11  -4   28.00   11.70
  11  17   4   41.20    9.70
  10 -18  -4    1.50    9.20
  18  10   4    5.70    6.70
   9 -18  -4    3.00    9.40
  18   9   4    4.50    6.40
  18   8  -4   -1.30    8.70
   8 -18  -4   -1.10    9.70
  18   8   4   -1.70    5.60
   7 -18  -4   -2.40    9.40
  18   7  -4   27.20    9.20
  18   7   4   -2.50    5.80
  18   6  -4   -0.80    7.50
   6 -18  -4   -0.10    9.00
  18   6   4   -1.60    5.50
   5 -18  -4    8.40   10.10
  18   5  -4    5.00    7.90
  18   5   4   12.10    6.10
   4 -18  -4    5.70    9.70
  18   4  -4   13.50    8.40
  18   4   4   12.60    5.80
   3 -18  -4    5.80    9.80
  18   3  -4   -3.00    7.00
  18   3   4    0.90    5.30
   2 -18  -4  -15.00    8.50
  18   2  -4   -2.00    7.10
  18   2   4    0.90    4.90
   1 -18  -4    8.50   10.70
  18   1  -4    0.00    7.90
  18   1   4    6.40    5.30
   0 -18  -4  -10.50    9.40
  18   0  -4   -4.60    7.10
  18   0   4   -1.60    4.40
  18  -1  -4   -1.60    7.80
  -1 -18  -4  -12.90    9.70
  18  -1   4   -0.20    4.70
  -2 -18  -4  -10.30    9.50
  18  -2  -4    2.30    8.00
  18  -2   4    1.30    4.70
  -3 -18  -4   14.30   11.30
  18  -3  -4    1.50    7.90
  18  -3   4    5.40    5.00
  18  -4  -4  -17.00    7.60
  -4 -18  -4    0.60   11.10
  18  -4   4   -0.70    4.60
  18  -5  -4  -16.20    7.30
  -5 -18  -4  -11.70   10.80
  18  -5   4    0.20    4.70
  18  -6  -4    4.70    8.80
  18  -6   4   -3.20    4.50
  18  -7  -4    4.10    9.20
  18  -7   4    3.80    4.80
  18  -8  -4    9.50   10.20
  18  -8   4   -4.90    4.40
   8  18   4    3.40    6.70
  18  -9  -4    3.40    9.30
   9  18   4    8.70    7.20
  18 -10  -4    2.00    8.90
  10  18   4    9.40    7.20
   8 -19  -4   -2.00    9.80
  19   8   4   -3.60    5.50
  19   7  -4   44.50   11.10
   7 -19  -4   47.70   13.30
  19   7   4   56.39    9.50
   6 -19  -4   -0.50    9.00
  19   6  -4   -5.10    7.00
  19   6   4   -2.40    5.20
   5 -19  -4   -1.60    9.30
  19   5  -4    0.90    7.80
  19   5   4   17.70    6.50
   4 -19  -4    9.70   10.20
  19   4  -4    1.30    8.10
  19   4   4   13.40    6.20
   3 -19  -4  154.18   21.30
  19   3  -4  127.99   17.60
  19   3   4  151.58   14.30
   2 -19  -4    9.00   10.40
  19   2  -4    1.00    8.10
  19   2   4   13.10    6.40
  19   1  -4   71.29   13.60
   1 -19  -4   81.19   15.60
  19   1   4   78.99   10.40
  19   0  -4   -5.60    7.80
   0 -19  -4   -6.20   10.30
  19   0   4    5.50    5.40
  19  -1  -4   22.90   10.60
  -1 -19  -4   28.00   12.20
  19  -1   4   27.20    6.70
  -2 -19  -4   33.40   12.80
  19  -2  -4   13.50    9.30
  19  -2   4   12.50    5.60
  19  -3  -4   81.39   14.50
  -3 -19  -4   96.59   17.30
  19  -3   4   90.19   11.20
  19  -4  -4   12.60    9.30
  -4 -19  -4    1.90   11.60
  19  -4   4    7.60    5.30
  19  -5  -4   18.30   10.60
  -5 -19  -4   11.50   11.90
  19  -5   4   10.00    5.60
  19  -6  -4   -3.40    8.50
   6  19   4    1.00    6.40
  19  -6   4    2.30    5.20
  19  -7  -4   -1.00    8.40
  19  -7   4   -3.60    4.40
   7  19   4    5.30    6.80
  19  -8  -4    2.00    9.20
  19  -8   4   -3.40    4.80
   8  19   4    6.50    7.40
   5 -20  -4   28.00   16.90
  20   5  -4   11.70    9.10
  20   5   4    5.70    6.10
  20   4  -4   -2.80    7.90
   4 -20  -4   17.20   12.40
  20   4   4   -0.70    5.50
   3 -20  -4   17.00   12.40
  20   3  -4    9.70    9.00
  20   3   4    2.80    5.70
   2 -20  -4    5.50   11.20
  20   2  -4    2.70    8.80
  20   2   4   -4.50    5.30
   1 -20  -4   12.90   12.60
  20   1  -4   -7.90    8.10
  20   1   4    1.90    5.60
   0 -20  -4    1.60   11.70
  20   0  -4   14.70    9.70
  20   0   4    3.80    5.40
  20  -1  -4   -0.90    8.50
  -1 -20  -4   21.20   13.10
  20  -1   4    6.10    5.70
  20  -2  -4   12.70    9.50
  -2 -20  -4   29.90   13.20
  20  -2   4    9.30    5.80
  20  -3  -4    5.40    9.20
  -3 -20  -4    8.30   12.10
  20  -3   4    3.40    5.10
  20  -4  -4   -6.70    8.40
  -4 -20  -4    2.80   13.60
  20  -4   4    5.00    5.40
  20  -5  -4   12.90    9.90
  20  -5   4   -6.80    4.60
   0   0  -5    5.80    7.20
   0  -1  -5   81.79   11.90
   0   1  -5   62.99   11.20
   1   0  -5   72.49   11.60
  -1   0  -5   61.59   11.70
  -1   1  -5  155.48   17.10
   1   1  -5  152.68   16.30
   1  -1  -5  147.39   16.60
  -1  -1  -5  163.58   17.30
   1  -2  -5  130.59   17.10
   0   2  -5   10.70    8.10
  -1  -2  -5   19.60    9.50
   1   2  -5   48.20    9.30
   2  -1  -5   22.40    8.00
  -2   1  -5   23.70    8.80
   2  -2  -5  202.78   19.00
  -2  -2  -5  187.28   19.60
  -2   2  -5  218.98   18.90
   2   2  -5  231.58   18.20
  -3  -2  -5   79.19   12.30
   2  -3  -5   79.99   12.50
  -2   3  -5   92.99   12.60
   3   2  -5  101.39   13.00
  -2   3   5   91.29    7.40
  -3  -1  -5   58.89   11.50
   3   1  -5   70.39   10.10
  -1   3  -5   81.79   11.10
   1  -3  -5   74.59   12.90
  -3   0  -5  164.98   18.50
   3   0  -5  128.69   15.00
   0  -3  -5  142.09   17.00
   0   3  -5  172.58   16.20
  -3   1  -5  -10.80    7.20
   1   3  -5   -2.40    6.20
   3  -1  -5    4.10    6.20
  -3   1   5   -2.30    2.10
  -2  -3  -5   21.90    8.80
  -3   2  -5   21.90    8.80
   3  -2  -5   16.80    7.80
   2   3  -5   20.40    7.60
   3  -3  -5    3.70    7.20
  -3   3  -5   10.90    6.90
   3   3  -5   -1.80    6.00
  -3  -3  -5    7.40    7.70
  -3   3   5    6.90    2.80
   4   3  -5   82.19   10.90
  -3   4  -5   70.59   10.60
  -4  -3  -5  102.09   13.90
  -4  -3   5   74.19    7.60
  -4  -2  -5  126.49   17.10
  -2   4  -5  125.39   14.40
   2  -4  -5  130.39   15.70
   4   2  -5  117.69   14.30
  -2   4   5  127.29    9.10
  -4  -2   5  125.99    9.40
  -1   4  -5   14.20    7.60
   4   1  -5   23.60    7.20
   1  -4  -5   33.90   10.30
  -4  -1  -5   13.00    8.50
  -4  -1   5   14.30    3.50
   4   0  -5    2.40    6.10
  -4   0  -5   16.10    8.20
   0  -4  -5    0.40    8.80
   0   4  -5    3.70    6.70
  -4   0   5   -1.50    2.20
  -1  -4  -5   -3.20    8.10
   4  -1  -5    3.50    6.60
  -4   1  -5    7.30    7.90
  -4   1   5    2.00    2.40
  -4   2  -5  199.08   18.30
   4  -2  -5  184.18   18.10
   2   4  -5  208.08   17.20
  -2  -4  -5  193.18   19.70
  -4   2   5  198.58   12.50
   3   4  -5   23.20    7.30
   4  -3  -5   14.40    8.10
  -3  -4  -5   12.80    8.70
  -4   3  -5   17.20    7.60
  -4   3   5   28.20    4.50
  -4  -4  -5   35.00   10.70
   4  -4  -5   33.10    9.40
   4   4  -5   42.60    8.30
  -4  -4   5   50.09    7.00
  -4   4   5   33.80    5.00
   4  -5  -5   57.49   10.50
  -5  -4  -5   56.59   11.80
   4  -5   5   80.69    7.60
  -4   5   5   54.39    6.80
  -5  -4   5   72.09    8.90
  -3   5  -5   85.09   11.00
  -5  -3  -5   97.29   13.60
   3  -5  -5   78.39   12.20
   5   3  -5  118.29   12.90
  -5  -3   5  100.79    8.70
  -3   5   5   84.39    7.90
  -2   5  -5   15.50    7.40
  -5  -2  -5   33.70   10.00
   2  -5  -5   18.80    8.70
   5   2  -5   31.10    7.40
  -2   5   5   26.80    4.70
  -5  -2   5   25.90    4.50
  -5  -1  -5   98.49   13.80
  -1   5  -5   98.69   12.10
   5   1  -5  101.29   12.00
   1  -5  -5  102.09   14.90
  -5  -1   5   88.19    8.00
  -1   5   5   94.79    8.30
   5   0  -5   54.89    9.70
   0  -5  -5   65.09   12.40
   0   5  -5   62.49    9.80
  -5   0  -5   77.19   11.70
   0   5   5   73.89    7.20
  -5   0   5   44.10    6.10
  -5   1  -5   12.80    8.40
  -1  -5  -5   52.79   10.60
   5  -1  -5    1.10    6.50
   2   5  -5   37.70    8.10
   5  -2  -5   43.10    9.40
  -5   2  -5   39.90    9.60
  -2  -5  -5   25.00    9.10
  -5   2   5   36.60    5.00
   3   5  -5   27.10    7.30
   5  -3  -5   33.40    8.50
  -3  -5  -5   15.10    8.10
  -5   3   5   22.30    4.30
   5  -3   5   20.80    5.10
  -3  -5   5   21.30    4.40
  -4  -5  -5   48.80   11.90
   4   5  -5   93.69   11.60
  -4  -5   5   80.79    8.20
   5  -4   5   55.29    7.40
  -5   4   5   59.49    7.10
   5   5  -5    3.00    5.50
   5  -5  -5    2.40    6.60
  -5  -5  -5    7.50    8.30
  -5   5   5   -0.40    2.60
   5  -5   5    2.40    3.40
  -5  -5   5   -1.00    4.20
  -6  -5  -5  169.58   19.40
   6   5  -5  157.88   14.30
   5  -6  -5  135.49   16.20
  -5   6   5  152.58   11.40
   5  -6   5  142.69   10.70
  -6  -5   5  165.58   13.40
   6   4  -5  175.08   15.70
  -6  -4  -5  186.08   19.60
  -6  -4   5  194.38   14.20
  -4   6   5  175.28   12.50
   4  -6   5  168.18   11.80
  -6  -3  -5  137.79   17.70
   6   3  -5   93.79   13.70
   3  -6  -5  124.59   14.90
  -3   6   5  128.69   10.10
  -6  -3   5  129.69   10.40
   3  -6   5  110.79    9.30
  -2   6  -5   -8.40    5.50
   6   2  -5   -2.60    5.40
   2  -6  -5    9.30    7.90
  -6  -2  -5    4.30    8.30
  -6  -2   5    4.10    2.90
  -2   6   5    0.80    3.30
  -1   6  -5   10.90    6.00
  -6  -1  -5    6.90    8.40
   6   1  -5    4.20    6.10
   1  -6  -5   -5.00    9.10
  -1   6   5   10.10    3.50
  -6  -1   5    8.10    3.20
   0  -6  -5   46.80   11.80
   0   6  -5   69.89    9.20
  -6   0  -5   48.20   10.70
  -6   0   5   37.10    5.40
   0   6   5   44.80    5.90
   6  -1  -5  107.19   14.40
  -1  -6  -5  132.49   16.30
   1   6  -5  155.98   13.80
  -6   1   5  125.19    9.70
   6  -1   5  112.39   10.90
   1   6   5  115.39    9.90
  -2  -6  -5  -10.60    6.90
   6  -2  -5    0.00    5.50
   2   6  -5    4.70    5.60
  -6   2   5   -2.80    2.60
   6  -2   5    5.00    4.00
   2   6   5   -0.40    3.20
   3   6  -5   37.70    7.40
  -3  -6  -5   24.10    9.20
   6  -3  -5   26.80    8.30
  -6   3   5   31.30    5.00
  -3  -6   5   30.30    5.10
   6  -3   5   26.20    5.40
  -4  -6  -5    0.30    8.50
   6  -4  -5   14.10    7.20
   4   6  -5   -0.70    5.30
  -6   4   5   -3.70    2.50
  -4  -6   5   -5.10    2.80
   6  -5  -5   22.90    8.20
  -5  -6  -5   15.60    8.80
   5   6  -5   14.00    6.10
  -5  -6   5   13.10    4.40
  -6   5   5    9.30    3.80
   6  -5   5    9.30    3.80
   6  -6  -5   88.19   12.70
  -6  -6  -5   97.99   14.70
   6   6  -5  104.99   11.70
   6  -6   5   86.89    8.10
  -6   6   5   77.99    8.60
  -6  -6   5   91.49   10.00
   6  -7  -5   14.60    7.80
  -7  -6  -5    8.90    9.80
   7   6  -5   19.70    6.50
   6  -7   5   11.70    3.60
  -7  -6   5   23.30    6.70
  -6   7   5   12.80    3.90
   7   5  -5   11.90    5.60
  -7  -5  -5   10.30    9.20
   5  -7  -5    4.10    6.60
   5  -7   5    1.30    2.90
  -7  -5   5    0.90    4.70
  -5   7   5    3.20    3.20
  -7  -4  -5   60.19   13.10
   4  -7  -5   56.49   10.90
  -7  -4   5  101.29    9.30
  -4   7   5   70.19    8.20
   4  -7   5   76.49    7.00
   7   3  -5    1.00    5.30
   3  -7  -5    0.00    7.20
  -7  -3  -5   -1.50    8.50
  -3   7   5   -1.80    3.20
  -7  -3   5   -1.40    3.10
   3  -7   5    0.10    3.10
   2  -7  -5  159.08   17.90
   7   2  -5  144.39   14.90
   2  -7   5  144.99   10.10
  -2   7   5  141.09   11.40
  -7  -2   5  157.38   11.50
   1  -7  -5    5.70    9.30
   7   1  -5    1.30    6.00
  -1   7  -5  -16.00    5.60
   7   1   5    4.00    4.30
  -7  -1   5    3.80    2.90
  -1   7   5   10.80    4.00
   7   0  -5   26.30    8.50
   0   7   5   51.29    7.30
  -1  -7  -5   11.80    8.60
   7  -1  -5  -10.70    6.20
   1   7   5   10.50    3.80
  -7   1   5    3.90    2.90
   7  -1   5   -1.00    3.90
  -2  -7  -5   82.49   13.70
   2   7  -5  105.49   11.90
   7  -2  -5   91.39   12.50
   2   7   5   97.29    9.50
  -2  -7   5   90.69    9.10
   7  -2   5   84.79    9.50
  -7   2   5   83.59    8.20
   7  -3  -5   43.20    9.30
  -3  -7  -5   28.60    9.60
  -7   3   5   32.60    5.30
   7  -3   5   40.90    6.00
   4   7  -5    1.60    5.30
  -4  -7  -5    9.30    9.40
   7  -4  -5    1.90    6.70
   7  -4   5    1.50    3.50
  -7   4   5   -0.20    2.70
  -4  -7   5   13.60    3.90
   5   7  -5   64.79    8.70
   7  -5  -5   45.50    9.60
  -5  -7  -5   43.70   11.80
  -5  -7   5   66.39    8.30
  -7   5   5   45.40    6.50
   7  -5   5   48.80    6.10
  -6  -7  -5   56.39   12.70
   6   7  -5   46.70    7.60
   7  -6  -5   47.00   10.00
   7  -6   5   42.60    5.60
  -7   6   5   44.10    6.30
  -6  -7   5   44.60    7.40
   7  -7  -5   19.20    8.40
  -7  -7  -5   13.40    9.80
   7   7  -5   11.20    5.80
   7  -7   5    7.90    3.10
  -7  -7   5   10.50    4.90
  -7   7   5   12.20    4.10
   7  -8  -5   10.20    8.30
   8   7  -5    9.90    5.50
  -8  -7   5   -0.30    4.70
  -7   8   5    3.10    3.20
   8   6  -5  168.28   14.80
   6  -8  -5  142.59   17.40
  -8  -6   5  155.28   14.30
  -6   8   5  140.69   12.10
   8   5  -5   18.90    6.20
   5  -8  -5    8.90    8.00
  -8  -5   5   16.30    6.00
  -5   8   5   19.70    4.80
   8   5   5   19.00    5.90
   4  -8  -5  214.68   20.20
   8   4  -5  228.58   18.40
   8   4   5  219.88   16.60
  -4   8   5  236.38   15.60
  -8  -4   5  220.28   16.00
   3  -8  -5   10.90    8.30
   8   3  -5   18.80    6.80
   8   3   5   16.20    5.30
  -8  -3   5   12.00    4.50
  -3   8   5   10.90    3.90
   8   2  -5   10.70    6.40
   2  -8  -5   35.30    9.00
  -8  -2   5    0.60    3.00
  -2   8   5    7.90    3.60
   8   2   5    3.70    4.60
   8   1  -5   41.00    8.90
   1  -8  -5   59.19   11.80
  -8  -1   5   44.70    6.60
  -1   8   5   48.10    7.20
   8   1   5   54.99    7.60
   8   0  -5  189.98   17.00
   0  -8  -5  169.78   19.50
   8   0   5  162.68   13.60
  -8   0   5  166.48   12.70
   0   8   5  185.78   13.30
  -1  -8  -5    3.30    8.50
   8  -1  -5   -4.10    6.00
   1   8   5   13.30    4.70
  -1  -8   5   23.70    7.20
   8  -1   5   25.30    5.30
  -8   1   5   11.90    3.90
   8  -2  -5   61.39   10.50
  -2  -8  -5   54.09   12.20
   2   8   5   76.89    9.00
   8  -2   5   74.59    8.70
  -8   2   5   53.69    7.20
  -2  -8   5   69.99    8.40
  -3  -8  -5   33.60   10.50
   8  -3  -5   32.80    9.30
  -3  -8   5   39.60    6.40
   8  -3   5   39.10    5.90
  -8   3   5   32.00    5.50
   8  -4  -5   39.00    9.90
  -4  -8  -5   53.09   12.10
   8  -4   5   36.30    5.70
  -8   4   5   40.60    6.20
  -4  -8   5   45.60    7.10
   8  -5  -5   82.69   12.10
  -5  -8  -5   68.79   13.40
  -8   5   5   67.09    8.30
  -5  -8   5   73.39    9.40
   8  -5   5   80.39    8.10
  -6  -8  -5   49.60   12.60
   8  -6  -5   51.99   10.60
  -6  -8   5   54.49    7.90
  -8   6   5   42.30    6.60
   8  -6   5   42.30    5.80
   8  -7  -5   91.09   13.30
  -7  -8  -5   75.29   15.20
  -7  -8   5  100.59   10.80
   8  -7   5   79.39    7.50
  -8   7   5   91.59    9.30
   8  -8  -5   -0.90    7.30
  -8  -8   5   -0.40    4.10
  -8   8   5   -0.40    3.10
   8  -9  -5   24.40    9.80
  -8   9   5   19.40    5.30
   9   8   5   20.20    7.20
   7  -9  -5   66.69   13.30
   9   7  -5  109.09   12.60
  -9  -7   5   87.89   12.20
  -7   9   5   89.69    9.50
   9   7   5   58.09    9.80
   6  -9  -5   -0.40    7.80
   9   6  -5   10.40    5.70
   9   6   5    5.80    5.30
  -9  -6   5    4.30    5.10
  -6   9   5    0.50    3.40
   5  -9  -5   13.10    8.30
   9   5  -5   35.90    7.80
  -9  -5   5   19.40    5.80
  -5   9   5   26.50    5.60
   9   5   5   19.50    6.30
   4  -9  -5    6.60    7.40
   9   4  -5   19.00    6.80
  -4   9   5   12.30    4.30
  -9  -4   5   11.80    4.70
   9   4   5   15.10    5.70
   9   3  -5  127.99   13.90
   3  -9  -5   78.19   13.20
  -9  -3   5   78.69    9.50
  -3   9   5   76.09    8.90
   9   3   5   73.59    9.40
   9   2  -5   36.90    9.30
   2  -9  -5   51.69   12.90
  -9  -2   5   42.20    6.70
  -2   9   5   51.49    7.40
   9   2   5   47.60    7.60
   9   1  -5   -2.90    5.70
   1  -9  -5   -4.40    8.40
   9   1   5    3.70    4.40
  -1   9   5    0.50    3.90
  -9  -1   5    3.40    3.40
   9   0  -5   28.70    8.10
  -9   0   5   27.00    5.40
   0  -9   5   37.10    6.10
   9   0   5   28.90    6.10
  -1  -9  -5   -1.30    7.80
   9  -1  -5   -7.80    5.80
   9  -1   5    2.50    4.20
  -1  -9   5   -0.70    3.80
   1   9   5    4.90    4.00
  -9   1   5   -2.30    2.80
   9  -2  -5   45.70    9.80
  -2  -9  -5   49.50   11.80
   9  -2   5   52.09    7.20
  -2  -9   5   79.19    9.10
   2   9   5   79.29    9.50
  -9   2   5   46.30    6.80
  -3  -9  -5    5.80    8.40
   9  -3  -5   -8.70    6.20
   9  -3   5    8.80    4.00
  -9   3   5   -2.30    2.90
   9  -4  -5   47.70   10.60
  -4  -9  -5   55.09   12.50
   9  -4   5   70.29    7.90
  -4  -9   5   64.29    9.20
  -9   4   5   54.29    7.30
  -5  -9  -5   -0.90    8.70
   9  -5  -5   -3.40    6.80
   9  -5   5    8.30    3.70
  -9   5   5    0.00    3.00
  -5  -9   5    3.50    4.00
  -6  -9  -5   50.29   12.90
   9  -6  -5   31.90    9.50
  -9   6   5   23.60    5.30
  -6  -9   5   25.50    6.20
   9  -6   5   21.70    4.30
  -7  -9  -5    4.50    9.90
   9  -7  -5   15.60    8.40
   9  -7   5    4.60    3.10
  -7  -9   5    7.40    4.60
  -9   7   5    4.70    3.90
   9  -8  -5   52.89   11.60
  -8  -9  -5   41.80   12.50
  -9   8   5   63.29    8.40
   9  -9  -5   23.10    8.90
   9   9   5   13.90    6.70
  -9   9   5   16.30    4.70
   9 -10  -5  -10.60    7.80
  10   9   5    0.80    5.80
   8 -10  -5   10.00    8.30
  10   8   5    3.80    5.70
  -8  10   5    3.80    5.00
  10   7  -5   59.99    9.10
   7 -10  -5   59.59   12.60
  10   7   5   33.60    8.20
  -7  10   5   49.10    7.60
  10   6  -5   16.10    6.20
   6 -10  -5   -2.20    7.50
  -6  10   5    4.70    3.90
  10   6   5    4.50    5.60
 -10  -6   5    9.50    5.70
  10   5  -5  236.88   18.70
   5 -10  -5  206.58   20.70
 -10  -5   5  219.18   16.60
  10   5   5  204.88   17.10
  -5  10   5  213.28   15.80
   4 -10  -5    2.90    8.00
  10   4  -5   10.70    6.70
 -10  -4   5    5.60    4.20
  -4  10   5    5.20    4.00
  10   4   5    9.10    5.40
  10   3  -5   31.00    8.60
   3 -10  -5   49.70   11.50
  10   3   5   37.10    7.50
  -3  10   5   39.00    6.80
 -10  -3   5   30.70    6.00
  10   2  -5    8.00    6.70
   2 -10  -5    5.90    9.50
 -10  -2   5   11.30    4.20
  -2  10   5    7.50    4.90
  10   2   5    9.90    4.90
   2 -10   5   11.00    4.90
  10   1  -5   38.40    9.20
   1 -10  -5   39.80   11.50
  10   1   5   45.60    7.50
  -1  10   5   46.10    7.40
 -10  -1   5   45.30    7.00
   1 -10   5   31.10    6.20
  10   0  -5   15.80    8.00
   0 -10  -5   25.40   10.20
   0  10   5   23.80    6.10
  10   0   5   21.70    5.70
 -10   0   5   19.30    4.90
  10  -1  -5   32.30    9.30
  -1 -10  -5   35.50   10.90
 -10   1   5   29.00    5.70
  10  -1   5   33.70    6.50
  -1 -10   5   44.30    6.80
   1  10   5   44.40    7.70
  -2 -10  -5    2.00    8.30
  10  -2  -5   -6.30    6.10
  -2 -10   5    5.90    4.50
  10  -2   5    4.60    4.10
 -10   2   5    1.00    3.10
  10  -3  -5   24.90    8.80
  -3 -10  -5   20.60    9.60
  10  -3   5   21.00    5.30
 -10   3   5   25.90    5.40
  -3 -10   5   34.30    6.70
  10  -4  -5   84.19   12.90
  -4 -10  -5   66.69   13.30
 -10   4   5   67.79    8.40
  10  -4   5   76.09    8.80
  -4 -10   5   96.69   10.70
  -5 -10  -5   22.10   11.00
  10  -5  -5   16.70    8.20
 -10   5   5   12.40    4.60
  -5 -10   5    9.80    5.00
  10  -5   5   11.40    4.00
  -6 -10  -5  157.48   21.40
  10  -6  -5  148.09   18.00
  10  -6   5  157.08   11.50
 -10   6   5  175.78   13.40
  -6 -10   5  151.58   21.40
  10  -7  -5   -5.20    7.60
  -7 -10  -5    6.30   10.10
 -10   7   5   -1.10    3.30
  10  -7   5   -0.80    2.90
  10  -8  -5   12.20    9.00
 -10   8   5    9.40    4.60
  10  -9  -5    5.40    8.10
   9  10   5    8.80    6.60
  10 -10  -5   41.80   11.90
  10  10   5   51.99    9.50
  10 -11  -5   26.80   10.40
  11  10   5   15.70    7.60
   9 -11  -5    1.70    8.20
  11   9   5   12.60    6.40
   8 -11  -5    8.00    8.10
  11   8   5    7.10    6.20
  11   7  -5   17.60    6.40
   7 -11  -5    5.90    8.30
  11   7   5    7.40    6.40
  11   6  -5   16.00    6.50
   6 -11  -5    8.60    7.70
  11   6   5    7.80    5.80
  -6  11   5    5.30    4.70
   5 -11  -5   -1.30    7.40
  11   5  -5    7.60    6.20
  11   5   5    0.70    5.20
 -11  -5   5    4.50    4.30
  -5  11   5    3.00    4.30
   4 -11  -5   -3.30    8.00
  11   4  -5    4.70    6.60
 -11  -4   5    4.20    4.40
  -4  11   5    1.30    4.20
  11   4   5    1.30    5.10
  11   3  -5   48.70   10.30
   3 -11  -5   49.40   13.30
 -11  -3   5   51.09    7.90
  -3  11   5   57.69    8.90
  11   3   5   54.99    8.60
  11   2  -5    5.90    6.70
   2 -11  -5   -2.90    8.30
  -2  11   5   -1.10    3.80
   2 -11   5   -1.50    4.80
  11   2   5   -2.50    4.30
 -11  -2   5    0.20    3.20
  11   1  -5    4.00    6.50
   1 -11  -5    7.50    9.00
 -11  -1   5    5.20    4.00
   1 -11   5    6.20    4.40
  -1  11   5    5.40    5.10
  11   1   5    5.20    5.20
   0 -11  -5   17.50    9.00
  11   0  -5    3.10    6.80
   0  11   5   28.00    6.40
 -11   0   5    5.70    4.00
   0 -11   5    6.90    4.30
  11   0   5    4.40    4.90
  -1 -11  -5   34.80   10.90
  11  -1  -5   26.30    9.20
  11  -1   5   23.30    6.10
 -11   1   5   24.90    5.40
   1  11   5   40.70    7.50
  -1 -11   5   25.20    6.40
  -2 -11  -5    1.10    8.60
  11  -3  -5   15.60    8.50
  -3 -11  -5   16.20   10.20
  11  -3   5   27.90    5.80
  -3 -11   5   28.30    8.00
 -11   3   5   24.20    5.60
  11  -4  -5   36.30   10.40
  -4 -11  -5   32.90   12.10
  11  -4   5   44.30    6.30
 -11   4   5   49.40    7.00
  11  -5  -5   -5.60    7.00
  -5 -11  -5   46.60   12.90
  11  -5   5    2.40    3.60
 -11   5   5   -1.30    3.30
  11  -6  -5    4.40    7.70
  -6 -11  -5   -0.20    9.70
 -11   6   5   -1.00    3.40
  11  -6   5   -1.00    3.20
  11  -7  -5   18.40    9.00
  -7 -11  -5   20.70   11.40
  11  -7   5   20.00    4.20
 -11   7   5   12.30    5.90
  11  -8  -5   28.20   10.50
  11  -9  -5   17.90    9.80
   9  11   5    6.40    7.20
  11 -10  -5    6.70    8.60
  10  11   5   10.00    7.20
  11 -11  -5    6.80    9.10
  11  11   5   -0.50    6.20
  11 -12  -5    4.50    8.70
  12  11   5   -0.90    6.70
  10 -12  -5   16.80   10.00
  12  10   5   23.20    7.90
   9 -12  -5    7.20    9.70
  12   9   5   22.30    7.80
   8 -12  -5   11.30   10.20
  12   8   5   22.70    7.10
   7 -12  -5    6.60    9.30
  12   7  -5   27.20    8.10
  12   7   5   18.40    7.10
  12   6  -5  121.89   16.10
   6 -12  -5  139.09   18.50
  12   6   5  162.88   14.90
   5 -12  -5    6.20    8.50
  12   5  -5    6.60    7.30
  12   5   5   10.20    6.00
   4 -12  -5   74.59   13.70
  12   4  -5   69.29   12.20
  12   4   5   67.59    9.60
 -12  -4   5   84.19   13.70
  12   3  -5    1.40    6.60
   3 -12  -5    4.10    8.70
  12   3   5   -0.10    5.10
 -12  -3   5    2.20    3.80
  12   2  -5   -0.80    7.00
   2 -12  -5   10.60    8.90
 -12  -2   5    5.10    4.10
  12   2   5    7.40    5.30
   1 -12  -5   81.99   14.00
  12   1  -5   76.99   12.90
  12   1   5   79.09    9.60
  -1  12   5   64.19   15.80
 -12  -1   5   79.39    9.70
  12   0  -5   67.79   12.30
   0 -12  -5   60.39   12.90
 -12   0   5   53.09    7.80
   0  12   5   49.40   15.40
  12   0   5   59.59    8.30
  -1 -12  -5   20.80   10.20
  12  -1  -5   17.10    8.80
 -12   1   5   26.20    5.80
  12  -1   5   25.30    6.20
  -2 -12  -5   11.00    9.40
  12  -2  -5   -1.20    7.20
  12  -2   5    6.30    4.70
 -12   2   5    4.30    3.80
  -3 -12  -5   22.80   10.90
  12  -3  -5    8.00    8.00
 -12   3   5   15.30    4.90
  12  -3   5   13.00    5.10
  -4 -12  -5    2.20    9.80
  12  -4  -5  -13.90    6.50
 -12   4   5   -1.40    3.30
  12  -4   5   -1.70    3.80
  12  -5  -5   65.09   12.40
  -5 -12  -5   52.59   13.80
 -12   5   5   56.29    8.60
  12  -5   5   64.19    8.40
  -6 -12  -5   -1.00   10.50
  12  -6  -5   20.90    8.60
  12  -6   5    1.10    3.40
  12  -7  -5   66.39   12.60
  -7 -12  -5   81.09   15.60
  12  -7   5   72.79    8.00
  12  -8  -5   -3.60    7.90
  12  -9  -5   -2.30    7.90
   9  12   5    6.30    7.40
  12 -10  -5   14.80   10.10
  10  12   5   30.80    8.90
  12 -11  -5   13.70   10.00
  11  12   5    8.40    7.40
  12 -12  -5    3.90    9.40
  12  12   5    7.50    7.00
  12 -13  -5    2.80    9.90
  13  12   5    0.20    6.60
  11 -13  -5   10.60   10.30
  13  11   5    0.80    6.50
  10 -13  -5   -3.30    8.60
  13  10   5   -0.90    6.20
   9 -13  -5   34.90   10.70
  13   9   5   10.00    7.00
   8 -13  -5   13.50   10.30
  13   8   5   20.70    7.50
  13   7  -5    0.80    5.90
   7 -13  -5   -1.70    8.50
  13   7   5   -8.60    5.50
   6 -13  -5   -5.80    8.40
  13   6  -5    9.40    6.70
  13   6   5    0.70    5.70
   5 -13  -5   -6.90    8.90
  13   5  -5    9.10    7.80
  13   5   5    9.70    6.30
   4 -13  -5   23.10   11.20
  13   4  -5   21.40    9.00
  13   4   5   27.10    7.20
   3 -13  -5   -3.90    8.50
  13   3  -5    1.00    7.20
  13   3   5   -0.40    5.10
   2 -13  -5   40.70   12.20
  13   2  -5   51.29   11.10
  13   2   5   43.80    8.00
  13   1  -5    0.80    7.40
   1 -13  -5   -2.10    8.30
  13   1   5    4.00    5.10
  13   0  -5   -2.70    7.40
   0 -13  -5    4.40    9.00
 -13   0   5    3.00    4.90
  13   0   5    4.60    5.20
  13  -1  -5   29.00   10.30
  -1 -13  -5   48.60   11.60
  13  -1   5   35.30    7.10
 -13   1   5   40.60    8.80
  -2 -13  -5   27.80   10.80
  13  -2  -5   22.40    9.90
 -13   2   5   23.50    7.60
  13  -2   5   22.60    5.90
  13  -3  -5   11.70    8.90
  -3 -13  -5   33.70   12.00
  13  -3   5   14.60    5.30
  13  -4  -5   10.00    8.10
  -4 -13  -5   -8.70    9.60
  13  -4   5    1.20    4.20
  13  -5  -5   13.40    8.80
  -5 -13  -5   -5.10   11.00
  13  -5   5   10.60    4.40
  -6 -13  -5   23.50   13.40
  13  -6  -5   23.30    9.90
  13  -6   5   21.00    4.90
  13  -7  -5   10.10    9.00
  -7 -13  -5    8.50   10.90
  13  -7   5   11.80    4.30
  13  -8  -5    9.50    8.60
   8  13   5    9.50    7.00
  13  -9  -5    2.40    8.60
   9  13   5    9.10    6.90
  13 -10  -5    2.00    9.00
  10  13   5   16.80    8.00
  13 -11  -5   -4.60    8.80
  11  13   5   -4.60    6.40
  13 -12  -5   -0.30    9.70
  12  13   5    9.80    7.50
  13 -13  -5    3.00   10.10
  13  13   5    7.20    7.10
  13 -14  -5    8.70   10.30
  14  13   5    7.00    7.00
  12 -14  -5    2.40    9.80
  14  12   5   10.00    7.40
  11 -14  -5   10.20   10.20
  14  11   5    8.10    7.30
  10 -14  -5   -5.50    9.40
  14  10   5   -1.40    6.00
   9 -14  -5    3.60    8.80
  14   9   5   -1.40    6.20
   8 -14  -5   -3.90    8.50
  14   8   5    0.10    5.90
   7 -14  -5   31.90   11.90
  14   7   5   26.30    7.60
  14   6  -5   -0.50    7.10
   6 -14  -5    7.10    9.20
  14   6   5    6.50    6.00
  14   5  -5    3.60    7.90
   5 -14  -5   13.00    9.70
  14   5   5   17.50    6.40
  14   4  -5   17.90    8.80
   4 -14  -5    1.50    9.30
  14   4   5    7.70    5.90
  14   3  -5   -2.90    7.20
   3 -14  -5    3.90    9.30
  14   3   5    3.70    5.30
  14   2  -5   23.50    9.30
   2 -14  -5   25.00   10.90
  14   2   5   24.50    6.90
  14   1  -5   -3.50    7.40
   1 -14  -5    0.40    9.00
  14   1   5    4.10    5.40
  14   0  -5   79.49   14.50
   0 -14  -5   95.09   15.40
  14   0   5   87.49   10.40
  14  -1  -5   -4.50    7.30
  -1 -14  -5    7.20    9.50
  14  -1   5   -4.60    4.60
  14  -2  -5    1.00    7.50
  -2 -14  -5   12.70   10.40
  14  -2   5   -3.80    4.50
  14  -3  -5   46.80   11.80
  -3 -14  -5   48.60   13.20
  14  -3   5   43.20    7.10
  -4 -14  -5  121.69   18.60
  14  -4  -5  134.19   17.20
  14  -4   5  125.99   11.70
  -5 -14  -5   61.89   15.00
  14  -5  -5   80.69   14.50
  14  -5   5   97.89    9.90
  -6 -14  -5   69.09   15.30
  14  -6  -5   70.29   13.50
  14  -6   5   78.19    9.10
  14  -7  -5   -4.40    7.90
  -7 -14  -5    5.90   11.00
  14  -7   5   -1.00    3.50
  14  -8  -5    1.40    8.80
   8  14   5   10.00    7.10
  14  -9  -5   12.80    9.80
   9  14   5   28.20    8.40
  14 -10  -5    9.80   10.10
  10  14   5   14.80    7.80
  14 -11  -5   18.90   11.30
  11  14   5   27.20    8.80
  14 -12  -5   -2.10    9.00
  12  14   5    1.20    7.00
  14 -13  -5    8.10   10.60
  13  14   5   -3.60    6.60
  12 -15  -5   13.30   10.90
  15  12   5    3.60    6.50
  11 -15  -5   12.10   10.30
  15  11   5    9.90    7.10
  10 -15  -5   27.50   11.70
  15  10   5   16.00    7.50
   9 -15  -5   15.20   10.30
  15   9   5    4.30    6.40
   8 -15  -5    9.90    9.70
  15   8   5    3.80    6.00
   7 -15  -5   -0.70    9.10
  15   7   5   -1.70    5.60
  15   6  -5   -8.00    6.90
   6 -15  -5    0.10    9.20
  15   6   5    5.60    6.00
  15   5  -5   -5.20    7.10
   5 -15  -5    9.60    9.50
  15   5   5    5.20    6.00
   4 -15  -5   -1.90    9.10
  15   4  -5    7.10    8.30
  15   4   5    7.80    6.00
   3 -15  -5    2.10    9.50
  15   3  -5   -0.70    7.50
  15   3   5   12.30    6.00
  15   2  -5   17.50    9.10
   2 -15  -5   10.00   10.50
  15   2   5   36.60    7.80
   1 -15  -5   -6.20    9.10
  15   1  -5    3.00    7.90
  15   1   5    0.40    5.20
  15   0  -5   -4.60    7.50
   0 -15  -5   -7.50    8.70
  15   0   5   -6.00    4.70
  -1 -15  -5   -2.90    9.10
  15  -1  -5    7.80    8.40
  15  -1   5    3.50    5.10
  15  -2  -5   41.20   11.40
  -2 -15  -5   40.90   13.30
  15  -2   5   43.20    7.50
  15  -3  -5    4.00    8.40
  -3 -15  -5   -0.50   10.30
  15  -3   5   -2.80    4.30
  -4 -15  -5   24.10   12.20
  15  -4  -5   21.70   10.10
  15  -4   5   20.20    5.60
  -5 -15  -5    6.80   10.60
  15  -5  -5    2.10    8.80
  15  -5   5   -3.40    4.20
  -6 -15  -5    1.20   10.80
  15  -6  -5    0.50    8.90
  15  -6   5    9.70    4.70
  -7 -15  -5    8.10   11.40
  15  -7  -5  -11.10    8.20
  15  -7   5   -1.70    3.70
  15  -8  -5   -1.20    8.60
   8  15   5   12.90    7.70
  15  -9  -5   -0.60    9.00
   9  15   5    1.60    6.90
  15 -10  -5   -5.10    9.20
  10  15   5    4.50    7.60
  15 -11  -5    2.20   10.30
  11  15   5    2.80    7.10
  15 -12  -5    0.40   10.10
  12  15   5    7.20    7.30
  10 -16  -5   15.40   10.10
  16  10   5   -4.40    6.10
   9 -16  -5   15.00   10.80
  16   9   5   30.00    8.50
   8 -16  -5   46.80   13.50
  16   8   5   61.09   10.10
   7 -16  -5   44.40   13.30
  16   7   5   47.70    9.20
   6 -16  -5   41.30   12.50
  16   6  -5   17.30    9.90
  16   6   5   39.40    8.60
  16   5  -5  -15.30    6.90
   5 -16  -5    1.00    9.30
  16   5   5   -4.50    5.50
   4 -16  -5    0.30    9.10
  16   4  -5   -1.00    7.60
  16   4   5   -1.40    5.60
   3 -16  -5   17.10   10.60
  16   3  -5    1.60    8.20
  16   3   5   15.80    6.80
  16   2  -5   -9.60    7.40
   2 -16  -5    0.10    9.20
  16   2   5   -3.00    5.30
  16   1  -5   18.00    9.70
   1 -16  -5    1.80    9.50
  16   1   5    8.20    6.00
   0 -16  -5   -4.10    9.00
  16   0  -5   11.30    8.80
  16   0   5    5.10    5.50
  16  -1  -5   -5.50    7.50
  -1 -16  -5    7.70    9.80
  16  -1   5   -3.10    4.70
  16  -2  -5    2.20    8.30
  -2 -16  -5    3.60   10.00
  16  -2   5   -2.60    4.60
  16  -3  -5   -0.70    7.90
  -3 -16  -5   -4.10   10.00
  16  -3   5    2.70    4.80
  16  -4  -5   53.79   12.80
  -4 -16  -5   50.69   14.60
  16  -4   5   51.39    7.60
  16  -5  -5   -8.40    8.30
  -5 -16  -5  -15.10    9.90
  16  -5   5    3.20    4.50
  16  -6  -5    2.20    9.50
  -6 -16  -5   16.30   12.20
  16  -6   5   25.60    5.60
  16  -7  -5    6.90   10.00
  16  -7   5    5.00    4.90
  16  -8  -5   12.70   11.00
   8  16   5   31.00    9.20
  16  -9  -5   18.00   11.50
   9  16   5   11.70    7.80
  16 -10  -5   57.59   13.60
  10  16   5   52.49   11.00
   9 -17  -5    0.40    9.60
  17   9   5    3.80    6.70
   8 -17  -5    6.50   10.40
  17   8   5   -3.20    6.30
   7 -17  -5   -7.30    9.30
  17   7   5    2.70    6.40
   6 -17  -5   15.00   11.20
  17   6  -5    5.60    9.30
  17   6   5   28.60    7.80
  17   5  -5    4.70    8.90
   5 -17  -5   -5.00    9.60
  17   5   5    0.20    6.10
  17   4  -5   13.70    9.90
   4 -17  -5   16.70   11.10
  17   4   5   16.80    6.90
   3 -17  -5   -0.70    9.70
  17   3  -5   -1.60    8.70
  17   3   5    1.80    5.80
   2 -17  -5   -6.60    9.10
  17   2  -5    3.40    8.70
  17   2   5   -0.40    5.40
  17   1  -5   -1.80    8.30
   1 -17  -5   -1.80    9.60
  17   1   5    7.20    5.80
  17   0  -5   -6.30    7.60
   0 -17  -5    3.20   10.10
  17   0   5    4.80    5.40
  17  -1  -5    1.40    8.50
  -1 -17  -5    5.50   11.40
  17  -1   5   12.50    5.70
  17  -2  -5   21.80   10.00
  -2 -17  -5   23.10   12.70
  17  -2   5   11.50    5.70
  -3 -17  -5    5.00   10.60
  17  -3  -5   -3.90    8.10
  17  -3   5    0.50    4.80
  -4 -17  -5    1.40   11.40
  17  -4  -5    7.30   10.10
  17  -4   5   13.70    5.50
  -5 -17  -5    7.20   12.00
  17  -5  -5   -6.40    9.00
  17  -5   5    1.20    4.30
  17  -6  -5   -0.30    9.10
  -6 -17  -5   19.90   13.40
  17  -6   5    4.00    4.70
  17  -7  -5   -1.40    9.40
   7  17   5   13.90    7.40
  17  -8  -5   26.20   12.20
   8  17   5   41.10   10.00
  17  -9  -5   -6.80    8.80
   9  17   5    1.20    7.50
   7 -18  -5    0.40   10.10
  18   7   5    0.30    6.50
  18   6  -5   14.70    9.80
   6 -18  -5    7.10   11.50
  18   6   5   20.60    7.30
  18   5  -5    7.70    9.20
   5 -18  -5   16.20   10.70
  18   5   5    4.20    6.20
  18   4  -5   10.80    9.30
   4 -18  -5   18.30   11.40
  18   4   5   19.00    7.40
  18   3  -5   16.70   10.00
   3 -18  -5   33.10   12.50
  18   3   5   30.20    7.60
  18   2  -5   45.10   13.10
   2 -18  -5   68.79   14.90
  18   2   5   57.49    9.20
  18   1  -5   -4.70    8.60
   1 -18  -5    2.40    9.90
  18   1   5   -1.20    5.20
  18   0  -5   -7.50    8.30
   0 -18  -5    9.10   10.70
  18   0   5    0.70    5.40
  -1 -18  -5   41.60   13.80
  18  -1  -5    8.00    9.30
  18  -1   5    6.80    5.80
  18  -2  -5   23.10   10.20
  -2 -18  -5   29.70   13.20
  18  -2   5   19.60    6.50
  18  -3  -5   40.90   12.40
  -3 -18  -5   50.89   14.50
  18  -3   5   40.00    7.80
  18  -4  -5   10.60   10.10
  -4 -18  -5   14.50   12.40
  18  -4   5   10.10    5.30
  18  -5  -5   18.80   10.80
  -5 -18  -5    0.70   11.90
  18  -5   5   11.10    5.30
  18  -6  -5   -7.20    8.50
  18  -6   5   -5.50    4.20
  18  -7  -5   -1.80    9.00
   7  18   5    4.90    6.80
  19   3  -5   -5.60    8.40
   3 -19  -5   -2.10   10.00
  19   3   5    2.00    5.80
  19   2  -5    4.50    8.90
   2 -19  -5   -3.30   10.10
  19   2   5    3.50    5.70
  19   1  -5   -6.10    8.50
   1 -19  -5    6.00   11.50
  19   1   5    2.50    5.50
  19   0  -5   18.60   10.40
   0 -19  -5   30.90   14.00
  19   0   5   20.90    6.70
  -1 -19  -5    0.50   11.80
  19  -1  -5   -5.50    8.40
  19  -1   5   -2.40    5.20
  -2 -19  -5    5.70   12.20
  19  -2  -5    1.50    9.00
  19  -2   5    2.20    5.40
  19  -3  -5   -0.40    9.30
  -3 -19  -5    1.50   11.50
  19  -3   5   -3.50    4.50
   0   0  -6  522.75   34.30
  -1   1  -6   16.20    8.70
   1  -1  -6   14.90    8.00
   1   1  -6   14.90    7.80
  -1  -1  -6    4.80    8.40
  -2  -1  -6   83.89   13.20
  -1   2  -6   85.49   13.10
   1  -2  -6   85.89   13.60
   2   1  -6  128.49   15.20
   0   2  -6   72.99   12.20
   0  -2  -6   73.69   12.40
  -2   0  -6   62.19   12.50
   2   0  -6   69.89   12.00
   2  -1  -6   37.70   10.10
  -1  -2  -6   28.20   10.10
  -2   1  -6   39.10   11.00
   1   2  -6   78.79   11.60
  -2  -2  -6   23.00    9.80
   2  -2  -6   22.30    9.40
  -2   2  -6   37.90   10.50
   2   2  -6   35.10    8.90
   3   2  -6    2.90    7.00
  -3  -2  -6   -0.30    8.50
   2  -3  -6    7.60    8.90
  -2   3  -6   20.40    8.90
   3   1  -6   22.50    8.20
   1  -3  -6    1.50    8.00
  -3  -1  -6    8.00    8.60
  -1   3  -6   21.10    8.20
  -3   0  -6   -2.50    8.60
   3   0  -6    1.80    7.50
   0   3  -6   10.10    8.40
   0  -3  -6   -4.60    7.60
  -3   1  -6   29.30    9.80
   1   3  -6   32.30    9.40
  -1  -3  -6   20.70    9.70
   3  -1  -6   14.40    7.90
   3  -2  -6    3.10    7.60
  -2  -3  -6   11.70    8.70
   2   3  -6    7.30    7.00
  -3   2  -6   -2.50    7.40
   3  -3  -6   17.90    8.90
  -3   3  -6   17.80    8.80
  -3  -3  -6    9.20    8.70
   3  -4  -6   16.20    8.80
  -4  -3  -6   10.40    9.30
   4   3  -6   19.70    7.90
  -3   4  -6    0.40    7.60
  -3   4   6   15.90    3.80
  -4  -2  -6   62.59   12.60
  -2   4  -6   66.19   11.20
   2  -4  -6   50.59   12.30
   4   2  -6   61.29   10.80
  -1   4  -6   39.90   10.40
  -4  -1  -6   37.70   11.10
   4   1  -6   30.20    9.00
   1  -4  -6   43.70   11.50
  -4   0  -6   83.59   14.00
   0   4  -6  116.19   14.10
   0  -4  -6   75.89   13.50
   4   0  -6   98.79   13.20
   4  -1  -6   51.19   10.60
  -1  -4  -6   59.89   12.40
  -4   1  -6   65.89   12.40
  -4   1   6   50.19    5.80
   4  -2  -6    4.70    7.10
  -2  -4  -6    0.50    8.60
   2   4  -6    6.00    7.60
  -4   2  -6   -2.60    7.90
  -4   2   6   -3.60    2.50
   3   4  -6   19.90    7.60
  -3  -4  -6    4.30    8.60
   4  -3  -6   19.20    8.20
  -4   3  -6   10.30    8.80
  -4   3   6    9.00    3.10
   4  -4  -6   -3.40    7.30
  -4  -4  -6    5.40    8.70
   4   4  -6   15.80    7.60
  -4   4  -6   -4.20    7.90
  -4   4   6   -1.40    2.60
   5   4  -6  165.98   15.90
   4  -5  -6  136.49   16.70
  -5  -4  -6   96.19   15.30
   4  -5   6  114.89   10.40
  -5  -4   6  109.09   10.00
  -4   5   6  100.69    9.40
  -5  -3  -6   12.70    9.10
   3  -5  -6   10.50    8.10
   5   3  -6   12.10    7.40
  -3   5  -6    5.20    7.30
  -5  -3   6    8.90    3.20
  -3   5   6    1.00    3.50
  -5  -2  -6   15.10    9.70
  -2   5  -6   21.90    8.20
   5   2  -6   18.40    8.00
   2  -5  -6   23.80   10.30
  -5  -2   6   13.80    3.80
  -2   5   6   23.80    4.90
  -5  -1  -6   -4.30    8.00
   1  -5  -6   -3.90    7.80
   5   1  -6   -5.40    6.60
  -1   5  -6   -1.00    6.80
  -5  -1   6   -0.60    2.30
   5   0  -6   17.20    8.00
  -5   0  -6   17.20    9.70
   0  -5  -6    5.70    8.90
   0   5  -6   18.10    8.70
  -5   0   6   17.50    3.80
  -1  -5  -6   -5.90    7.70
   5  -1  -6    5.00    7.20
  -5   1  -6    2.40    8.40
   1   5  -6   -7.50    6.90
  -5   1   6   -2.30    2.30
   2   5  -6   62.79   11.00
   5  -2  -6   46.50   10.30
  -2  -5  -6   49.90   12.00
  -5   2  -6   39.50   10.60
  -5   2   6   41.20    5.90
  -3  -5  -6    3.40    8.00
   5  -3  -6   20.80    8.10
   3   5  -6    1.10    6.60
  -5   3   6    5.60    3.20
  -4  -5  -6   27.30   10.20
   5  -4  -6   25.50    9.40
   4   5  -6   40.20    8.50
   5  -4   6   17.00    5.20
  -5   4   6   20.40    4.50
  -5  -5  -6    6.20    9.30
   5   5  -6   26.90    8.20
   5  -5  -6   22.90    8.80
  -5   5   6   11.10    3.70
  -5  -5   6   14.50    4.50
   5  -5   6    4.00    4.40
   5  -6  -6    4.80    8.00
   6   5  -6   13.30    7.50
  -6  -5  -6    1.50    9.20
   5  -6   6    0.90    3.80
  -5   6   6   -1.10    4.40
  -6  -4  -6   55.59   13.30
   6   4  -6   92.99   12.60
   4  -6  -6   58.79   12.10
   4  -6   6   80.89    8.80
  -4   6   6   81.19    8.70
  -6  -4   6   77.89    8.90
   6   3  -6   65.79   11.30
   3  -6  -6   54.49   11.60
  -6  -3  -6   71.59   13.70
   3  -6   6   69.09    8.10
  -3   6   6   60.89    8.30
  -6  -3   6   57.09    7.20
   2  -6  -6  104.59   15.90
  -6  -2  -6  103.49   15.80
   6   2  -6  106.29   13.80
  -6  -2   6   96.39    8.80
  -2   6   6   91.69    9.10
  -6  -1  -6    9.70    9.80
   6   1  -6    7.40    7.50
   1  -6  -6    6.10    8.70
  -1   6   6    6.90    3.90
  -6  -1   6    5.20    3.00
   6   0  -6   75.39   12.40
   0  -6  -6   61.79   12.90
  -6   0  -6   84.99   14.20
  -6   0   6   68.89    7.30
   6  -1  -6   35.80    9.70
  -1  -6  -6   29.10   10.20
  -6   1   6   32.50    5.10
  -2  -6  -6    5.60    8.70
   6  -2  -6    8.00    8.00
   6  -2   6   11.50    5.10
  -6   2   6    4.80    3.10
  -3  -6  -6   12.80    8.90
   6  -3  -6    3.10    7.30
   6  -3   6   -1.60    4.10
  -6   3   6   -0.60    3.00
   6  -4  -6   75.19   12.90
  -4  -6  -6   85.19   15.00
   6  -4   6   81.79    9.50
  -6   4   6   86.69    8.80
  -4  -6   6   87.89   10.40
   6  -5  -6   53.39   11.00
  -5  -6  -6   33.40   11.80
  -6   5   6   41.60    7.90
   6  -5   6   38.10    6.40
   6  -6  -6   33.00   10.00
  -6  -6  -6   17.90   10.40
   6  -6   6   20.00    5.10
  -7  -6  -6   14.10   10.40
   6  -7  -6   12.00    8.70
   5  -7  -6   51.99   11.60
   7   5  -6   38.10   10.10
  -7  -5  -6   42.80   12.30
  -7  -4  -6    4.10   10.00
   7   4  -6   13.70    7.90
   4  -7  -6   28.80    9.00
  -7  -3  -6   11.90   10.90
   3  -7  -6    7.20    8.90
   7   3  -6   12.70    7.50
  -7  -3   6   11.50    4.90
  -3   7   6   14.40    5.40
   2  -7  -6   30.00   10.40
   7   2  -6   11.20    7.50
  -7  -2  -6   22.70   10.80
  -7  -2   6    7.30    3.70
  -2   7   6    6.40    4.00
   1  -7  -6   10.80    9.00
   7   1  -6    8.20    7.50
   7   1   6    1.90    5.30
  -1   7   6    5.60    4.10
  -7  -1   6    3.80    3.20
   7   0  -6   31.40    9.40
   0  -7  -6   48.40   11.30
   7   0   6   36.40    7.30
   0   7   6   46.60    6.60
  -7   0   6   38.30    5.80
  -1  -7  -6   13.40    9.20
   7  -1  -6   21.20    8.40
   7  -1   6   16.60    5.90
  -7   1   6   11.90    3.90
   1   7   6   12.20    4.70
  -2  -7  -6   -1.60    8.20
   7  -2  -6   18.00    8.50
  -7   2   6    3.10    3.30
   7  -2   6    2.00    4.90
  -3  -7  -6   -1.00    8.00
   7  -3  -6    2.30    7.30
   7  -3   6   -0.10    4.50
  -7   3   6   -2.60    2.80
  -4  -7  -6   12.20    9.90
   7  -4  -6   22.60    9.40
   7  -4   6   17.00    5.40
  -5  -7  -6    4.00    9.40
   7  -5  -6   11.90    8.70
   7  -5   6    4.40    4.00
  -6  -7  -6   49.50   13.60
   7  -6  -6   55.49   11.60
   7  -6   6   48.40    6.60
  -7  -7  -6   12.40   11.40
   7  -7  -6   17.00    9.00
  -8  -7  -6   50.79   13.40
   7  -8  -6   31.10   10.50
   6  -8  -6   32.80   10.80
   8   5  -6   11.00    7.00
   5  -8  -6    2.00    8.00
   4  -8  -6   -3.70    7.60
   8   4  -6    1.90    6.90
   8   4   6    2.60    5.70
   8   3  -6   61.19   10.80
   3  -8  -6   46.10   12.30
   8   3   6   65.99    9.50
   2  -8  -6   19.00    9.60
   8   2  -6   13.10    7.70
   8   2   6    6.30    5.70
   1  -8  -6   51.09   11.80
   8   1  -6   23.30    9.10
   8   1   6   43.20    7.90
   0  -8  -6    7.00    8.20
   8   0  -6    7.60    7.70
   8   0   6    2.00    5.50
  -1  -8  -6   23.20   10.10
   8  -1  -6    4.70    7.50
   8  -1   6   12.90    5.80
  -2  -8  -6    1.20    8.50
   8  -2  -6    2.80    7.90
   8  -2   6    5.10    5.20
  -3  -8  -6   21.90   10.60
   8  -3  -6   42.50   10.70
   8  -3   6   44.50    7.20
  -4  -8  -6   93.99   15.80
   8  -4  -6   86.79   14.20
   8  -4   6   88.89   10.10
   8  -5  -6    5.50    8.20
  -5  -8  -6   -0.40    8.60
   8  -5   6    1.10    3.90
  -6  -8  -6   35.40   12.40
   8  -6  -6   36.50   10.80
   8  -6   6   36.10    5.90
   8  -7  -6   32.60   11.00
  -7  -8  -6    7.40   10.90
   8  -8  -6   77.99   14.90
  -8  -8  -6   70.49   15.40
   8  -9  -6   -2.70    8.90
   9   8   6    4.90    6.70
   7  -9  -6    1.40    8.50
   9   7   6   11.00    6.80
   6  -9  -6   31.50   11.10
   9   6   6   22.10    8.40
   5  -9  -6   -9.30    8.10
   9   5  -6   17.50    7.30
   9   5   6    3.90    6.00
   9   4  -6   66.49   11.40
   4  -9  -6   39.70   12.00
   9   4   6   53.89    9.20
   3  -9  -6  -11.30    7.90
   9   3  -6    7.60    7.50
   9   3   6    1.30    5.60
   2  -9  -6    8.20    8.80
   9   2  -6   18.60    8.40
   9   2   6   39.10    7.50
   9   1  -6   -7.60    6.60
   1  -9  -6    0.70    8.10
   9   1   6    0.60    5.60
   9   0  -6   -0.30    7.30
   0  -9  -6    4.80    9.10
   9  -1  -6   -4.70    7.30
  -1  -9  -6   26.70   10.30
   9  -1   6   10.90    5.60
   9  -2  -6   15.70    8.60
  -2  -9  -6   24.20   11.00
   9  -2   6   17.60    5.80
   9  -3  -6   -1.20    7.30
  -3  -9  -6    0.20    9.30
   9  -3   6    6.80    5.00
  -4  -9  -6    9.30   10.40
   9  -4  -6   37.30   11.00
   9  -4   6   43.70    6.70
  -5  -9  -6   24.50   11.90
   9  -5  -6   15.60    9.50
   9  -5   6   19.30    5.40
  -6  -9  -6   25.90   12.50
   9  -6  -6   17.20    9.90
   9  -6   6   29.80    6.10
   9  -7  -6   14.00    9.60
  -7  -9  -6   20.70   12.00
  -8  -9  -6   11.40   11.10
   9  -8  -6    5.50    8.80
   9  -9  -6   -4.60    8.70
   9   9   6    6.50    6.90
   9 -10  -6   14.30    9.80
  10   9   6   16.80    7.60
   8 -10  -6   74.49   14.30
  10   8   6   99.09   13.00
   7 -10  -6   -2.80    8.20
  10   7   6    1.30    6.30
   6 -10  -6    4.50    9.00
  10   6   6    4.50    6.50
  10   5  -6   29.80    8.70
   5 -10  -6    0.20    8.70
  10   5   6    4.70    6.50
   4 -10  -6   98.49   16.60
  10   4   6   95.29   12.30
   3 -10  -6   -7.60    8.50
  10   3  -6    6.10    7.70
  10   3   6   11.20    6.60
   2 -10  -6  131.89   18.80
  10   2  -6  153.28   18.30
  10   2   6  197.68   16.20
  10   1  -6    5.40    8.00
   1 -10  -6    6.20    9.10
  10   1   6    8.50    5.90
  10   0  -6   78.79   12.00
   0 -10  -6   36.80   12.30
  10   0   6   32.90    7.70
  10  -1  -6   -5.50    7.00
  -1 -10  -6   -0.90    8.80
  10  -1   6   -1.90    4.90
  10  -2  -6   10.20    8.70
  -2 -10  -6    3.60   10.10
  10  -2   6    7.10    5.60
  10  -3  -6   14.90    9.80
  10  -3   6   38.50    6.70
  -4 -10  -6   27.00   11.80
  10  -4  -6   16.20    9.40
  10  -4   6   15.70    5.50
  10  -5  -6   -1.60    7.90
  -5 -10  -6   23.60   11.60
  10  -5   6    2.70    4.50
  -6 -10  -6    5.00   10.80
  10  -6  -6    4.00    8.50
  10  -6   6    1.40    3.90
  10  -7  -6    1.60    9.10
  -7 -10  -6   15.00   12.00
  -8 -10  -6    2.20   10.50
  10  -8  -6    5.50    8.90
  10  -9  -6   13.70   10.20
   9  10   6   22.70    8.70
  10 -10  -6   18.30   10.90
  10  10   6   32.30    9.30
  10 -11  -6   -2.60    8.50
  11  10   6    4.20    7.80
   9 -11  -6   -3.70    8.60
  11   9   6   -4.70    6.50
   8 -11  -6   11.50    9.80
  11   8   6   14.40    7.90
   7 -11  -6    8.10    9.40
  11   7   6   20.80    8.10
   6 -11  -6   20.90   10.20
  11   6   6   33.40    9.00
  11   5  -6   40.80    9.90
   5 -11  -6    7.20    9.00
  11   5   6   16.20    7.70
  11   4  -6   20.50    8.40
   4 -11  -6   18.50   10.60
  11   4   6    4.20    6.30
   3 -11  -6    5.20    8.80
  11   3  -6    8.10    8.00
  11   3   6    5.50    6.10
   2 -11  -6   17.30    9.80
  11   2  -6   11.50    8.30
  11   2   6   14.30    6.70
  11   1  -6    0.20    7.90
   1 -11  -6    9.60    9.20
  11   1   6    0.80    5.60
   0 -11  -6   26.50   11.00
  11   0  -6   11.80    9.00
  11   0   6   27.50    7.30
  -1 -11  -6   53.59   12.10
  11  -1  -6    1.60    8.30
  11  -1   6    4.50    5.50
  -2 -11  -6   23.70   10.70
  11  -2  -6    5.40    8.20
  11  -2   6    2.70    5.20
  11  -3  -6    6.90    8.80
  -3 -11  -6   27.30   10.70
  11  -3   6    8.20    5.20
  -4 -11  -6   10.10   10.80
  11  -4  -6   10.20    8.70
  11  -4   6    7.20    5.00
  11  -5  -6    0.00    7.70
  -5 -11  -6   -7.70   10.00
  11  -5   6   -3.30    4.00
  -6 -11  -6    1.20   11.80
  11  -6  -6   14.70    9.40
  11  -6   6   16.80    5.50
  -7 -11  -6    2.40   10.50
  11  -7  -6    1.60    8.70
  11  -8  -6    4.20    9.00
  -8 -11  -6   18.20   12.60
  11  -9  -6    9.40    9.30
   9  11   6   19.00    8.40
  11 -10  -6    1.30    8.90
  10  11   6    4.70    7.80
  11 -11  -6   -3.60    9.10
  11  11   6   -5.80    6.80
  11 -12  -6    0.60    9.30
  12  11   6   -0.30    7.20
  10 -12  -6   31.00   11.50
  12  10   6   -1.30    7.10
   9 -12  -6    8.50   10.20
  12   9   6   10.60    7.60
   8 -12  -6    3.80    9.40
  12   8   6    6.80    7.20
   7 -12  -6    1.30    9.10
  12   7   6    3.50    6.80
   6 -12  -6   -7.70    8.70
  12   6   6    5.00    6.70
  12   5  -6   19.60    8.00
   5 -12  -6    3.10    9.20
  12   5   6   10.10    6.90
  12   4  -6   17.40    8.50
   4 -12  -6   11.70   10.00
  12   4   6   13.50    6.90
   3 -12  -6   20.10   10.90
  12   3  -6   17.60    8.90
  12   3   6   31.00    7.90
  12   2  -6   68.09   13.00
   2 -12  -6   67.79   14.60
  12   2   6   78.29   10.80
  12   1  -6   -0.20    8.20
   1 -12  -6   14.70    9.90
  12   1   6   -1.60    5.80
  12   0  -6    6.40    8.30
   0 -12  -6    4.20    9.80
  12   0   6    1.60    5.50
  12  -1  -6   14.00    9.20
  -1 -12  -6    8.20   10.10
  12  -1   6   11.20    5.80
  12  -2  -6  163.58   20.50
  -2 -12  -6  199.98   23.40
  12  -2   6  195.08   15.60
  12  -3  -6   -2.40    8.20
  -3 -12  -6   32.10   11.70
  12  -3   6    2.70    5.10
  -4 -12  -6   82.39   16.00
  12  -4  -6   55.79   13.00
  12  -4   6   71.39    9.80
  -5 -12  -6   17.90   12.10
  12  -5  -6   11.20    9.80
  12  -5   6    1.00    4.30
  -6 -12  -6   10.10   11.40
  12  -6  -6   21.40   10.30
  -7 -12  -6   15.10   11.70
  12  -7  -6   -7.40    8.40
  12  -8  -6   57.59   13.70
  12  -9  -6   -4.20    9.40
   9  12   6   10.70    7.90
  12 -10  -6   -6.10    8.70
  10  12   6   -1.60    7.40
  12 -11  -6   -3.30    9.60
  11  12   6    1.80    7.90
  12 -12  -6    1.80   10.20
  12  12   6   -0.90    7.10
  11 -13  -6   -1.00    9.80
  13  11   6   -7.90    6.60
  10 -13  -6    5.20    9.70
  13  10   6    8.00    7.80
   9 -13  -6   -9.20    8.60
  13   9   6   -1.50    6.60
   8 -13  -6   -5.50    9.30
  13   8   6    1.90    6.40
   7 -13  -6  -16.00    8.70
  13   7   6   -2.70    6.70
   6 -13  -6   -6.50    9.20
  13   6   6   -4.20    6.50
  13   5  -6   10.70    7.70
   5 -13  -6  -12.50    8.60
  13   5   6   -5.90    5.70
   4 -13  -6    8.50    9.80
  13   4  -6    8.70    8.40
  13   4   6   11.50    6.80
  13   3  -6    1.00    8.20
   3 -13  -6    7.60    8.90
  13   3   6    0.10    5.80
  13   2  -6    9.30    8.80
   2 -13  -6    5.70    9.30
  13   2   6   -1.90    5.80
   1 -13  -6    2.40    9.60
  13   1  -6    9.40    9.20
  13   1   6    7.50    6.50
   0 -13  -6   18.80   10.60
  13   0  -6   -0.20    8.50
  13   0   6    2.10    5.80
  13  -1  -6   -6.70    8.60
  -1 -13  -6    2.40    9.50
  13  -1   6    3.60    5.60
  -2 -13  -6   14.60   10.70
  13  -2  -6    4.60    8.70
  13  -2   6    3.30    5.50
  13  -3  -6   14.60    9.50
  -3 -13  -6   18.40   11.50
  13  -3   6   11.70    5.80
  -4 -13  -6   55.59   14.30
  13  -4  -6   54.49   13.30
  13  -4   6   51.59    8.00
  13  -5  -6   29.10   11.20
  -5 -13  -6   22.50   12.00
  13  -5   6   23.50    5.70
  13  -6  -6   28.30   11.20
  -6 -13  -6   26.40   13.20
  13  -7  -6    2.70    9.70
  -7 -13  -6   -0.30   10.90
  13  -8  -6   -5.30    8.50
  13  -9  -6   -3.70    9.00
   9  13   6    4.40    7.20
  13 -10  -6    4.40   10.10
  10  13   6   13.20    8.70
  13 -11  -6   -0.60    9.10
  11  13   6    2.60    7.80
  10 -14  -6   36.10   12.50
  14  10   6   44.80   10.10
   9 -14  -6   -1.60    9.20
  14   9   6    5.40    7.00
   8 -14  -6    3.10   10.00
  14   8   6   10.50    7.50
   7 -14  -6   15.70   11.10
  14   7   6    1.40    6.80
   6 -14  -6    4.50   10.40
  14   6   6    7.50    7.10
  14   5  -6    2.40    6.80
   5 -14  -6   -9.00    9.00
  14   5   6   -2.40    6.10
   4 -14  -6   13.60   11.40
  14   4  -6    7.90    8.20
  14   4   6   27.30    7.80
  14   3  -6    4.40    8.00
   3 -14  -6    0.40    9.90
  14   3   6   15.50    7.10
   2 -14  -6    5.10   10.20
  14   2  -6   15.80    9.50
  14   2   6   12.00    6.80
   1 -14  -6   -2.00    9.50
  14   1  -6   -0.50    8.70
  14   1   6    0.10    5.90
   0 -14  -6   -8.90    9.20
  14   0  -6   -0.80    8.80
  14   0   6   -4.10    5.30
  -1 -14  -6    6.40   11.20
  14  -1  -6   12.20    9.80
  14  -1   6   17.70    6.50
  14  -2  -6   20.70   10.20
  -2 -14  -6   21.20   12.50
  14  -2   6   22.70    6.70
  -3 -14  -6   17.90   12.10
  14  -3  -6   27.50   10.70
  14  -3   6   12.70    6.00
  -4 -14  -6   10.50   11.70
  14  -4  -6    3.20    9.00
  14  -4   6    0.30    4.90
  -5 -14  -6   -5.50   10.40
  14  -5  -6    0.10    8.90
  14  -5   6   -0.10    4.50
  14  -6  -6   20.10   11.30
  -6 -14  -6   14.50   12.60
  -7 -14  -6    1.70   11.90
  14  -7  -6    8.60   10.30
  14  -8  -6   33.30   13.00
   8  14   6   57.99   11.10
  14  -9  -6    6.00   10.10
   9  14   6   11.50    8.00
  14 -10  -6    2.10    9.60
  10  14   6    0.20    7.70
   9 -15  -6    2.50   10.10
  15   9   6    1.70    6.70
   8 -15  -6   10.40   11.00
  15   8   6   14.30    7.70
   7 -15  -6   -0.30    9.70
  15   7   6    6.30    6.80
   6 -15  -6  -12.10    9.20
  15   6   6   13.90    7.60
   5 -15  -6   -5.10    9.30
  15   5  -6   -8.20    7.10
  15   5   6    2.00    6.30
  15   4  -6  -12.00    7.10
   4 -15  -6    2.20    9.80
  15   4   6    4.70    6.50
   3 -15  -6   -3.50    9.50
  15   3  -6   -1.00    8.40
  15   3   6   -1.10    5.70
   2 -15  -6   -2.50    9.50
  15   2  -6   -8.60    8.10
  15   2   6   -5.10    5.60
  15   1  -6   -0.60    8.50
   1 -15  -6    1.00    9.80
  15   1   6  -10.20    5.20
   0 -15  -6   -3.70    9.60
  15   0  -6   -1.30    8.60
  15   0   6    6.00    6.10
  -1 -15  -6   14.40   11.50
  15  -1  -6   -1.60    8.30
  15  -1   6   -1.80    5.40
  -2 -15  -6    3.80   10.90
  15  -2  -6   -0.60    9.10
  15  -2   6    4.90    5.60
  15  -3  -6   19.50   10.30
  -3 -15  -6   15.90   12.30
  15  -3   6    5.70    5.50
  -4 -15  -6   -1.40   11.30
  15  -4  -6    7.70   10.00
  15  -4   6    1.90    4.90
  -5 -15  -6   -6.90   10.80
  15  -5  -6    6.70   10.00
  15  -5   6    7.50    5.10
  -6 -15  -6   12.10   12.30
  15  -6  -6   -6.80    9.30
  -7 -15  -6    4.60   11.70
  15  -7  -6   -8.90    9.10
  15  -8  -6    6.90   10.30
   8  15   6   17.50    8.60
  15  -9  -6   10.30   10.60
   9  15   6   15.50    8.30
   7 -16  -6    6.50   10.60
  16   7   6   11.30    7.30
   6 -16  -6   10.40   11.20
  16   6   6   18.00    7.80
   5 -16  -6   21.50   12.00
  16   5   6   13.80    7.20
  16   4  -6    7.80    9.30
   4 -16  -6   24.60   12.40
  16   4   6   32.00    8.40
   3 -16  -6   -5.10    9.80
  16   3  -6   -6.90    7.90
  16   3   6   -1.00    5.90
  16   2  -6   -6.00    8.40
   2 -16  -6   -4.20    9.60
  16   2   6    2.10    6.20
   1 -16  -6   -1.70   10.50
  16   1  -6  -10.90    8.50
  16   1   6    0.00    6.30
  16   0  -6   29.50   11.40
   0 -16  -6   27.50   12.70
  16   0   6   36.00    8.10
  -1 -16  -6   -6.00   11.10
  16  -1  -6   12.10   10.10
  16  -1   6   -1.60    5.50
  -2 -16  -6    8.60   12.50
  16  -2  -6   16.50   11.30
  16  -2   6   35.20    7.80
  -3 -16  -6   15.80   13.10
  16  -3  -6    9.00   10.00
  16  -3   6    6.50    5.50
  16  -4  -6    3.00   10.20
  -4 -16  -6   11.70   12.30
  16  -4   6    4.30    5.20
  -5 -16  -6   10.10   11.00
  16  -5  -6   -6.00    9.00
  16  -5   6   -7.90    4.20
  16  -6  -6    5.70   10.20
  -6 -16  -6   -2.20   11.60
  16  -7  -6   10.90   10.90
   4 -17  -6    5.30   10.30
  17   4  -6    5.60    9.30
  17   4   6    4.80    6.80
   3 -17  -6   15.10   11.40
  17   3  -6    0.20    8.60
  17   3   6   -3.00    6.30
  17   2  -6   13.60   10.20
   2 -17  -6   13.90   11.10
  17   2   6    3.40    6.40
   1 -17  -6    3.50   10.60
  17   1  -6   -5.20    8.90
   0 -17  -6    0.20   10.10
  17   0  -6   -4.60    8.40
  17   0   6    1.70    6.00
  -1 -17  -6    2.00   11.60
  17  -1  -6    2.30    9.60
  17  -1   6   -3.80    5.40
  -2 -17  -6    4.30   11.40
  17  -2  -6    6.20    9.90
  17  -2   6   10.30    5.90
  17  -3  -6    2.90    9.80
  -3 -17  -6   -8.20   10.10
  17  -3   6    4.40    5.50
  -4 -17  -6   20.30   13.40
  17  -4  -6   10.80   10.80
  17  -4   6   15.60    6.00
   0   0  -7   24.10    9.90
   0   1  -7   37.40   10.70
   1   0  -7   26.30   10.50
  -1   0  -7   20.80   10.20
   0  -1  -7   22.20    9.80
  -1   1  -7  215.48   23.50
   1  -1  -7  251.07   23.00
  -1  -1  -7  269.97   24.10
  -2  -1  -7   41.00   12.40
   2   1  -7   57.79   12.40
  -1   2  -7   49.60   12.80
   2   0  -7   25.70    9.30
   0  -2  -7   18.00    9.60
   0   2  -7   25.60   10.30
  -2   0  -7   10.30   10.00
   2  -1  -7   27.10    9.50
  -1  -2  -7   21.10    9.60
  -2   1  -7    7.30   10.40
   1   2  -7   30.40   10.60
   2   2  -7   15.20    9.50
   2  -2  -7   14.10    8.70
  -2   2  -7   13.60    9.40
  -2  -2  -7    7.00    9.20
  -2   3  -7   32.20    9.60
  -3  -2  -7   20.50   10.50
   2  -3  -7   11.30    8.60
   3   2  -7   13.60    8.50
  -3  -1  -7   17.40   10.70
   1  -3  -7   33.60   10.40
  -1   3  -7   40.20   11.30
   3   1  -7   26.60   10.00
   0  -3  -7   24.30   10.00
  -3   0  -7    6.50    9.50
   3   0  -7   17.80    8.80
   3  -1  -7    5.80    8.10
   1   3  -7   15.00    9.30
  -1  -3  -7    6.20    9.40
  -3   1  -7    2.60    9.50
  -3   2  -7    6.70    8.80
   2   3  -7   46.50   11.40
  -2  -3  -7    7.20    9.30
   3  -2  -7    6.20    8.10
  -3   3  -7   14.40    9.30
   3   3  -7    6.80    8.50
   3  -3  -7   10.90    9.00
  -3  -3  -7   11.60   10.40
   4   3  -7    8.00    7.90
   3  -4  -7   15.80    9.30
  -3   4  -7   13.90    9.00
  -4  -3  -7    7.90   10.30
   2  -4  -7   -2.00    7.60
  -4  -2  -7    2.10    8.80
  -2   4  -7    6.60    8.70
   4   2  -7   11.50    8.30
  -1   4  -7   17.80    9.10
   4   1  -7   10.30    8.90
   1  -4  -7   20.50    9.40
  -4  -1  -7   13.20   10.40
   0   4  -7    6.70    9.30
  -4   0  -7    5.10   10.00
   0  -4  -7   12.40    9.50
   4   0  -7   -5.80    7.50
   1   4  -7   10.10    9.50
  -4   1  -7    0.60    9.40
  -1  -4  -7    6.40    9.10
   4  -1  -7   12.70    9.00
  -2  -4  -7   -3.00    8.70
  -4   2  -7   12.90    9.80
   2   4  -7    5.80    9.00
   4  -2  -7   -1.20    7.90
  -4   3  -7   23.90   11.20
  -3  -4  -7   24.30   11.50
   4  -3  -7   17.90    9.70
   3   4  -7   44.80   10.90
   4   4  -7   24.70    8.60
  -4  -4  -7    2.40   10.00
   4  -4  -7   21.50   10.40
   4  -5  -7   32.50   10.90
  -5  -4  -7   32.70   12.30
   5   4  -7   38.10   10.00
   3  -5  -7  138.89   18.70
  -5  -3  -7   93.39   16.40
   5   3  -7  126.89   17.40
   2  -5  -7   14.70    9.30
  -5  -2  -7   15.80   10.20
   5   2  -7   16.70    8.70
  -5  -1  -7  178.48   22.40
   1  -5  -7  176.58   21.10
   5   1  -7  204.98   20.60
   0  -5  -7   26.10   10.90
   5   0  -7   25.40   10.00
  -5   0  -7   35.20   12.40
   5  -1  -7   14.80    9.20
  -5   1  -7   17.70   11.70
  -5   2  -7   -0.40   10.60
  -2  -5  -7   13.90   10.00
   5  -2  -7   12.00    8.60
   5  -3  -7   17.70    9.70
  -3  -5  -7   17.80   10.90
   5  -3   7   21.10    6.50
  -4  -5  -7    1.70    9.70
   5  -4  -7   -2.00    8.10
   5  -4   7    3.20    4.70
  -5  -5  -7    5.70   10.10
   5  -5  -7   14.90    9.50
  -6  -5  -7    0.70    9.80
   5  -6  -7    5.30    9.10
   6   4  -7    0.00    7.80
  -6  -4  -7    5.50    9.80
   4  -6  -7    5.20    9.50
   6   3  -7   -0.60    7.70
  -6  -3  -7   -2.50    9.90
   3  -6  -7   10.90    9.00
   6   2  -7    9.10    8.20
  -6  -2  -7   -4.80    9.40
   2  -6  -7    6.20    8.50
   1  -6  -7   56.69   12.10
   6   1  -7   16.70    8.60
  -6  -1  -7    4.10   10.70
  -6   0  -7   -5.60   10.00
   0  -6  -7    7.90    9.60
   6   0  -7    7.40    8.10
  -1  -6  -7    3.40    9.20
   6  -1  -7   19.00    9.20
   6  -2  -7   23.50    8.50
  -2  -6  -7    3.00    9.30
   6  -2   7    1.40    5.70
   6  -3  -7   -5.90    7.70
  -3  -6  -7   11.60   10.20
   6  -3   7   -2.00    5.10
  -4  -6  -7   -9.30    9.50
   6  -4  -7   -4.10    7.50
   6  -4   7   -1.30    4.90
   6  -5  -7    3.00    8.50
  -5  -6  -7    7.80   10.30
   6  -6  -7    7.90    8.60
  -6  -6  -7    6.90   10.00
   6  -7  -7    1.20    8.60
  -7  -6  -7   15.20   11.20
   5  -7  -7   13.60    9.90
  -7  -5  -7   -2.40   10.40
   4  -7  -7   -0.10    9.60
  -7  -4  -7    3.00   10.10
   7   4  -7    8.00    8.50
   3  -7  -7    0.50    9.20
   7   3  -7   15.60    8.60
  -7  -3  -7    1.70   10.50
   2  -7  -7   14.20    9.70
   7   2  -7    8.80    8.00
   1  -7  -7   35.20   11.30
   7   1  -7   27.70    9.80
   7   1   7   16.10    7.40
   7   0  -7   13.60    8.70
   0  -7  -7    7.60    9.90
   7   0   7    6.20    6.30
  -1  -7  -7   -1.70    9.00
   7  -1  -7    7.70    7.90
   7  -1   7   -6.00    5.20
   7  -2  -7   11.90    9.00
  -2  -7  -7   23.10   11.20
   7  -2   7   10.70    6.40
  -3  -7  -7   59.89   14.70
   7  -3  -7   75.69   14.40
   7  -3   7   81.09   11.20
   7  -4  -7    4.20    8.30
  -4  -7  -7   -4.50   10.20
   7  -4   7    0.60    4.80
   7  -5  -7   79.09   14.40
  -5  -7  -7   60.89   15.00
   7  -6  -7   10.80    9.00
  -6  -7  -7    8.60   11.00
  -7  -7  -7    7.40   11.10
   7  -7  -7   37.40   11.50
   7  -8  -7   11.30    9.70
   6  -8  -7    1.80    8.60
   5  -8  -7    6.90    9.50
   8   5   7   -0.50    7.00
   8   4  -7   17.80    9.10
   4  -8  -7   10.30    9.60
   8   4   7   -0.90    6.40
   8   3  -7   10.30    8.80
   3  -8  -7    7.20    9.60
   8   3   7    5.40    7.20
   2  -8  -7   -6.80    8.30
   8   2  -7    6.60    8.50
   8   2   7    9.70    6.90
   1  -8  -7   -5.60    8.20
   8   1  -7    9.10    8.50
   8   1   7    2.50    6.20
   8   0  -7    6.80    8.70
   0  -8  -7    6.90    9.10
   8   0   7    1.30    6.20
   8  -1  -7    4.00    8.00
  -1  -8  -7    7.70    9.50
   8  -1   7    0.80    6.30
  -2  -8  -7    8.00    9.70
   8  -2  -7    3.40    8.50
   8  -2   7    8.00    5.90
   8  -3  -7    6.90    8.80
  -3  -8  -7   -0.10    9.80
   8  -3   7    7.90    5.90
   8  -4  -7   -1.20    8.20
  -4  -8  -7   -6.20    9.50
   8  -4   7   -3.00    4.50
  -5  -8  -7    6.70   10.50
   8  -5  -7   18.40   10.00
  -6  -8  -7    2.40   10.80
   8  -6  -7    3.30    8.50
   8  -7  -7   -4.20    8.10
  -7  -8  -7   -5.70    9.90
   8  -8  -7    0.70    9.40
   8  -9  -7    8.30    9.40
   9   8   7   15.20    8.50
   7  -9  -7   56.69   13.90
   9   7   7   93.89   13.20
   6  -9  -7    2.00    8.90
   9   6   7   14.00    8.00
   5  -9  -7    6.30    9.40
   9   5   7   15.60    7.90
   9   4  -7   11.80    9.50
   4  -9  -7    6.60    9.80
   9   4   7    6.60    7.30
   3  -9  -7   83.99   16.00
   9   3  -7  147.49   19.30
   9   3   7  148.69   16.00
   2  -9  -7    3.80    9.60
   9   2  -7   19.60    9.90
   9   2   7    4.50    7.30
   9   1  -7   25.00   10.30
   1  -9  -7   23.50   11.30
   9   1   7   38.90    8.90
   9   0  -7    3.30    8.30
   0  -9  -7   18.70   10.10
   9   0   7    2.30    6.30
  -1  -9  -7   15.40   10.20
   9  -1  -7   -0.50    8.20
   9  -1   7    0.80    5.90
  -2  -9  -7   29.10   11.60
   9  -2  -7    2.80    8.50
   9  -2   7    3.50    6.30
   9  -3  -7   -9.60    8.90
  -3  -9  -7    7.30   10.50
   9  -3   7    2.50    5.50
  -4  -9  -7    5.90   10.80
   9  -4  -7    7.10    9.30
   9  -4   7    0.30    5.10
   9  -5  -7   -1.90    8.90
  -5  -9  -7   -6.30    9.50
   9  -6  -7    4.40    9.40
  -6  -9  -7    8.00   11.10
  -7  -9  -7   -1.80   10.60
   9  -7  -7    3.40    9.20
   9  -8  -7    0.80    9.20
  -8  -9  -7    5.40   11.50
   9  -9  -7   41.50   12.60
   9   9   7   41.40   10.30
   9 -10  -7  -13.10    8.30
  10   9   7    2.10    7.70
   8 -10  -7    5.80    9.50
  10   8   7   -5.40    7.30
   7 -10  -7    7.70    9.60
  10   7   7    4.80    7.70
   6 -10  -7   -3.20    8.70
  10   6   7   10.30    8.00
   5 -10  -7   -4.80    8.90
  10   5   7    3.40    7.30
   4 -10  -7    4.50    9.60
  10   4  -7   25.60   13.10
  10   4   7    5.50    7.50
   3 -10  -7    6.60    9.80
  10   3  -7   13.10    8.90
  10   3   7    7.60    7.40
  10   2  -7   17.50    9.00
   2 -10  -7   11.60    9.80
  10   2   7    5.60    7.20
   1 -10  -7   13.50   10.30
  10   1  -7    1.10    7.90
  10   1   7   12.30    7.00
   0 -10  -7   13.60   10.10
  10   0  -7    8.20    9.00
  10   0   7    0.70    6.20
  10  -1  -7   -5.60    8.10
  -1 -10  -7   10.60    9.70
  10  -1   7   -3.60    5.70
  -2 -10  -7   25.40   11.20
  10  -2  -7  -10.40    7.90
  10  -2   7    5.10    6.00
  10  -3  -7    0.70    9.30
  -3 -10  -7    6.90   10.40
  10  -3   7   -0.40    5.60
  10  -4  -7    6.30    9.60
  -4 -10  -7   13.70   11.00
  10  -4   7    8.50    5.50
  10  -5  -7   -5.10    8.80
  -5 -10  -7   -3.80   10.30
  -6 -10  -7   22.10   12.40
  10  -6  -7   -1.10    8.70
  10  -7  -7    1.20    9.50
  -7 -10  -7   -5.20   10.30
  10  -8  -7  -14.50    8.20
  10  -9  -7   12.60   10.10
   9  10   7   10.70    8.50
  10 -10  -7    0.70    9.60
  10  10   7    1.00    8.10
  10 -11  -7    8.20    9.70
  11  10   7   -1.40    7.70
   9 -11  -7    5.10    9.30
  11   9   7   -2.90    7.50
   8 -11  -7   -1.90    9.20
  11   8   7    4.70    8.00
   7 -11  -7   11.50   10.50
  11   7   7   11.60    8.60
   6 -11  -7    2.00    9.60
  11   6   7    4.30    7.20
   5 -11  -7   -1.10    8.90
  11   5   7   13.40    8.10
   4 -11  -7   21.80   11.50
  11   4   7   23.70    8.50
  11   3  -7  138.49   18.90
   3 -11  -7   93.39   16.80
  11   3   7  129.09   15.50
   2 -11  -7    2.90    9.90
  11   2  -7   16.00    9.30
  11   2   7    1.70    6.40
  11   1  -7   25.30   10.40
   1 -11  -7   44.60   13.50
  11   1   7   23.10    8.50
   0 -11  -7    6.00   10.00
  11   0  -7    7.60    9.40
  11   0   7   11.60    7.00
  -1 -11  -7   44.50   13.70
  11  -1  -7   33.30   11.60
  11  -1   7   51.89    9.40
  11  -2  -7    3.10    8.80
  -2 -11  -7   24.50   11.30
  11  -2   7   14.80    6.60
  11  -3  -7   84.09   15.10
  -3 -11  -7   71.39   15.70
  11  -3   7   88.09   12.00
  11  -4  -7    7.40   10.40
  -4 -11  -7   -4.00   10.00
  11  -4   7   -2.10    5.20
  -5 -11  -7    1.90   10.60
  11  -5  -7    1.10    9.30
  11  -6  -7   -5.70    8.80
  -6 -11  -7    7.10   11.60
  11  -7  -7   15.10   10.80
  -7 -11  -7   25.30   13.00
  11  -8  -7    0.70   10.10
  11  -9  -7    1.40    9.60
   9  11   7    3.70    8.00
  11 -10  -7    7.30    9.80
  10  11   7    0.20    7.60
   9 -12  -7    4.70    9.80
  12   9   7   -2.20    7.50
   8 -12  -7    0.40    9.30
  12   8   7    7.00    8.00
   7 -12  -7  -10.10    8.50
  12   7   7    2.10    7.60
   6 -12  -7    1.80    9.70
  12   6   7    5.10    7.40
   5 -12  -7    5.40   10.20
  12   5   7    0.20    7.10
   4 -12  -7    8.50   10.40
  12   4   7    3.70    7.10
  12   3  -7   11.20    8.50
   3 -12  -7   -9.20    8.60
  12   3   7    0.60    6.90
  12   2  -7   15.40    9.10
   2 -12  -7    9.80   10.50
  12   2   7    2.40    6.90
   1 -12  -7   -2.50    9.40
  12   1  -7    5.90    8.90
  12   1   7    3.90    6.90
  12   0  -7    1.60    9.10
   0 -12  -7   -3.70    9.60
  12   0   7    1.80    6.40
  -1 -12  -7    6.30   10.40
  12  -1  -7   -1.00    9.00
  12  -1   7    1.10    5.90
  12  -2  -7    4.60    9.60
  -2 -12  -7    5.70   11.20
  12  -2   7   -0.80    5.60
  -3 -12  -7   -0.50   10.60
  12  -3  -7    5.70    9.40
  12  -3   7    1.00    5.60
  -4 -12  -7    9.80   11.70
  12  -4  -7    7.80   10.00
  12  -4   7    1.80    5.50
  12  -5  -7   -2.00    8.80
  -5 -12  -7   -5.30   10.40
  12  -6  -7    2.20   10.00
  -6 -12  -7    9.10   11.90
  12  -7  -7    9.40   10.40
  -7 -12  -7   -1.80   11.80
  12  -8  -7    0.60    9.70
  12  -9  -7   -2.50    9.40
   9  12   7    1.10    7.90
   7 -13  -7   -7.80    9.50
  13   7   7    4.20    8.10
   6 -13  -7   -1.00    9.60
  13   6   7    2.40    7.30
   5 -13  -7    0.00    9.60
  13   5   7   12.60    7.90
   4 -13  -7    4.30   10.00
  13   4   7    1.00    7.00
   3 -13  -7    3.70    9.80
  13   3  -7   13.80    8.80
  13   3   7   -9.70    6.20
  13   2  -7    4.40    8.60
   2 -13  -7   -5.70    8.90
  13   2   7   -1.00    6.50
  13   1  -7    3.60    8.60
   1 -13  -7    8.10   10.60
  13   1   7   -3.90    6.30
  13   0  -7   12.50   10.30
   0 -13  -7    6.30   11.20
  13   0   7    4.50    6.90
  -1 -13  -7   27.40   12.80
  13  -1  -7   34.00   12.00
  13  -1   7   47.80    9.20
  13  -2  -7   18.50   11.10
  -2 -13  -7    0.00   10.70
  13  -2   7   -2.60    5.70
  -3 -13  -7   29.90   13.20
  13  -3  -7   50.69   13.80
  13  -3   7   43.40    8.20
  -4 -13  -7    7.10   11.40
  13  -4  -7   -0.70    9.10
  13  -4   7   -4.30    7.20
  -5 -13  -7    0.70   10.50
  13  -5  -7   -2.00    9.70
  13  -6  -7   -4.20    9.60
  -6 -13  -7    2.40   11.30
  -7 -13  -7   42.10   15.00
  13  -7  -7   40.00   13.90
   5 -14  -7   -3.00    9.70
  14   5   7    2.20    7.30
   4 -14  -7   -4.30    9.80
  14   4   7   -1.80    6.70
   3 -14  -7    9.60   11.00
  14   3  -7    1.50    8.60
  14   3   7   13.90    7.80
  14   2  -7    3.60    9.10
   2 -14  -7    2.70   10.50
  14   2   7   -5.30    6.10
   1 -14  -7   -6.70    9.90
  14   1  -7    1.80    9.40
  14   1   7   -7.90    6.00
  14   0  -7    4.50   10.10
   0 -14  -7    6.30   11.20
  14   0   7   -4.20    5.90
  14  -1  -7    7.60   10.10
  -1 -14  -7   -4.40   11.10
  14  -1   7   -4.30    5.70
  14  -2  -7   -0.40    8.80
  -2 -14  -7   -2.90   10.80
  14  -2   7   -1.30    5.70
  14  -3  -7   -5.90    9.10
  -3 -14  -7    0.80   11.10
  14  -3   7  -10.40    5.00
  14  -4  -7    5.10   10.10
  -4 -14  -7    7.20   11.40
  -5 -14  -7    1.10   11.40
  14  -5  -7   -2.40    9.90
   1 -15  -7    1.50   10.70
  15   1  -7   -6.20    8.80
  15   0  -7    1.80    9.80
   0 -15  -7    1.40   10.90
  15   0   7   -7.00    5.90
  -1 -15  -7   -5.00   11.00
  15  -1  -7   13.50   11.60
   0   0  -8  165.48   22.00
   0  -1  -8   19.70   10.90
   0   1  -8   43.20   12.30
  -1   0  -8   27.40   11.50
   1   0  -8   41.60   11.80
   1  -1  -8   27.70   10.80
   1   1  -8   29.30   11.20
  -1  -1  -8    6.40   10.30
  -1   1  -8   14.90   10.90
   2   1  -8   41.90   12.20
  -2  -1  -8   31.40   12.00
  -1   2  -8   40.30   13.10
   1  -2  -8   48.90   12.60
  -2   0  -8   33.30   12.00
   0  -2  -8   31.60   11.10
   0   2  -8   35.30   12.30
   2   0  -8   42.10   11.90
  -2   1  -8   22.90   11.10
  -1  -2  -8   29.70   11.60
   1   2  -8   28.20   11.50
   2  -1  -8   33.40   11.60
  -2   2  -8    0.70    9.30
   2   2  -8    6.00   10.20
  -2  -2  -8   10.40   10.20
   2  -2  -8   16.90   10.40
   3   2  -8   22.90   11.50
  -3  -2  -8    8.30   10.00
   2  -3  -8   17.30   10.70
   3   1  -8   12.40   10.00
   1  -3  -8    9.50    9.60
  -3  -1  -8   20.10   11.40
   0  -3  -8   25.50   11.00
   3   0  -8   20.00   10.10
  -3   0  -8   12.70   10.20
   3  -1  -8   10.50    9.40
  -3   1  -8   10.60   10.50
  -1  -3  -8    9.00   10.10
  -3   2  -8   24.80   11.20
   3  -2  -8   12.60    9.70
  -2  -3  -8   16.40   10.90
  -3  -3  -8    5.80   10.20
   3  -3  -8    5.00    9.10
   3  -4  -8   11.30    9.70
  -4  -3  -8    5.90   10.60
  -4  -2  -8   54.09   13.70
   2  -4  -8   44.40   13.30
   4   2  -8   47.40   12.30
  -4  -1  -8   27.00   12.10
   1  -4  -8   18.60   10.80
   4   1  -8   15.20   10.10
  -4   0  -8   33.50   12.30
   4   0  -8   36.90   11.00
   0  -4  -8   22.70   11.60
  -4   1  -8   -0.40   10.40
   4  -1  -8    7.00    8.50
  -1  -4  -8   11.20   11.00
   4  -2  -8    7.10    8.80
  -4   2  -8   -2.80   10.40
  -2  -4  -8   -4.00    9.70
  -3  -4  -8   -6.40    9.80
   4  -3  -8    9.00    9.40
   4  -4  -8   -4.10    8.40
  -4  -4  -8    2.30   10.20
   4  -5  -8    6.50    9.20
  -5  -4  -8    6.70   11.00
  -5  -3  -8   -3.30   10.80
   3  -5  -8   10.80    9.70
   5   2  -8    4.80    9.30
   2  -5  -8   10.10    9.90
  -5  -2  -8    6.10   10.20
  -5  -1  -8   -1.30   10.50
   5   1  -8    4.90    9.40
   1  -5  -8   17.80   10.10
   5   0  -8    9.70    9.10
   0  -5  -8   14.10   10.20
  -5   0  -8   -4.20   10.80
  -1  -5  -8    2.80    9.70
   5  -1  -8    8.40    8.50
  -5   1  -8   14.70   11.90
  -2  -5  -8   10.80   10.90
   5  -2  -8    7.70    8.80
  -3  -5  -8   -7.20    9.70
   5  -3  -8    6.40    8.80
  -4  -5  -8   10.00   10.70
   5  -4  -8   11.40    9.60
   5  -5  -8    9.90    9.80
  -5  -5  -8    7.40   10.80
   5  -6  -8   10.40    9.50
  -6  -5  -8   14.90   12.00
   4  -6  -8   26.40   10.80
  -6  -4  -8    4.20   11.00
   3  -6  -8    8.00    9.80
  -6  -3  -8   -2.30   11.10
  -6  -2  -8   21.50   12.40
   2  -6  -8   24.70   11.50
   6   2  -8   42.20   11.50
   1  -6  -8   15.90   10.60
   6   1  -8   15.60    9.30
  -6  -1  -8    4.10   11.00
   6   0  -8   25.40   10.00
   0  -6  -8   12.30   10.60
   6  -1  -8   11.30    9.50
  -1  -6  -8    8.90   10.50
   6  -1   8    2.80    6.80
   6  -2  -8   23.30   10.40
  -2  -6  -8   25.90   12.40
   6  -2   8    7.80    6.90
   6  -3  -8   14.10   10.00
  -3  -6  -8    8.50   11.20
  -4  -6  -8   19.20   12.10
   6  -4  -8   26.60   11.20
  -5  -6  -8    5.60   11.00
   6  -5  -8   -0.10    9.10
   6  -6  -8    7.80    9.70
  -6  -6  -8    7.70   11.60
   6  -7  -8   14.40   10.00
  -7  -6  -8    0.90   10.90
  -7  -5  -8    5.50   11.30
   5  -7  -8    8.20    9.30
   4  -7  -8    6.30    9.30
  -7  -4  -8    0.40   10.60
   3  -7  -8    8.20    9.00
   7   2  -8   18.20    9.80
   2  -7  -8    5.60    9.10
   7   2   8    0.60    6.80
   7   1  -8   16.20    9.20
   1  -7  -8   14.90   10.30
   7   1   8    2.00    6.80
   0  -7  -8    6.90    9.80
   7   0  -8    3.50    8.50
   7   0   8    7.70    7.00
  -1  -7  -8    1.60    9.20
   7  -1  -8    6.70    8.60
   7  -1   8    0.10    6.30
  -2  -7  -8   -0.70    9.80
   7  -2  -8   13.30    9.50
   7  -2   8   -5.20    6.20
  -3  -7  -8    6.70    9.90
   7  -3  -8    5.80    9.30
   7  -4  -8    6.00    9.10
  -4  -7  -8   -3.10    9.50
   7  -5  -8    1.10    9.60
  -5  -7  -8   -3.30   10.30
   7  -6  -8   10.90   10.00
  -6  -7  -8    4.80   11.00
   7  -7  -8   -0.20    9.10
  -7  -7  -8   -5.40   10.50
   7  -8  -8    6.40   10.40
   8   7   8    2.50    7.70
   6  -8  -8    9.80   10.20
   8   6   8   21.40    8.70
   5  -8  -8    0.70    9.50
   8   5   8    4.50    7.80
   4  -8  -8   17.70   10.50
   8   4   8   11.20    8.40
   3  -8  -8   14.60   10.70
   8   3   8   20.60    8.60
   2  -8  -8    5.50   10.40
   8   2  -8   19.00    9.70
   8   2   8   21.70    8.50
   1  -8  -8   12.60   10.40
   8   1  -8   14.80    9.80
   8   1   8    8.00    7.80
   0  -8  -8    8.80   10.70
   8   0  -8    9.30    8.80
   8   0   8   -2.20    6.70
   8  -1  -8    4.90    8.30
  -1  -8  -8    5.20   10.40
   8  -1   8   -8.40    6.40
   8  -2  -8   13.40    9.70
  -2  -8  -8   -4.90    9.70
   8  -2   8    7.00    7.10
  -3  -8  -8    4.30   11.20
   8  -3  -8    5.70    9.60
  -4  -8  -8   13.30   11.90
   8  -4  -8   11.90    9.80
   8  -5  -8    4.00   10.00
  -5  -8  -8   -3.90   10.40
   8  -6  -8   -2.70    8.90
  -6  -8  -8    1.90   11.40
  -7  -8  -8   -3.00   11.00
   8  -7  -8    5.40    9.90
   8  -8  -8   30.60   12.40
   8   8   8   26.80    9.70
   7  -9  -8    7.00   10.10
   9   7   8    3.10    8.00
   6  -9  -8    7.20   10.30
   9   6   8   20.30    8.80
   5  -9  -8    2.00    9.70
   9   5   8   -4.50    6.90
   4  -9  -8    4.20    9.50
   9   4   8    5.00    7.80
   3  -9  -8    3.40    9.70
   9   3   8   10.40    8.20
   2  -9  -8    0.30    9.60
   9   2  -8   14.60    9.70
   9   2   8   20.90    8.80
   1  -9  -8    5.80   10.30
   9   1  -8    6.20    8.90
   9   1   8    1.40    7.40
   0  -9  -8   11.60   10.90
   9   0  -8    7.40    8.90
   9   0   8    3.60    7.30
  -1  -9  -8   10.40   10.60
   9  -1  -8    3.80    8.90
   9  -1   8   -3.00    6.40
  -2  -9  -8   11.20   11.30
   9  -2  -8    0.20    9.00
   9  -2   8    1.10    6.40
  -3  -9  -8   -2.10   10.10
   9  -3  -8    0.00    9.00
   9  -4  -8    1.80    9.50
  -4  -9  -8   -3.40   10.00
   9  -5  -8   -2.30    9.60
  -5  -9  -8    5.40   11.60
   9  -6  -8   -1.60    8.60
  -6  -9  -8   -1.60   11.00
   9  -7  -8   -4.30    9.00
  -7  -9  -8    2.10   11.20
   5 -10  -8   -0.70    9.80
  10   5   8    2.30    8.10
   4 -10  -8   41.10   12.20
  10   4   8   27.70   10.00
   3 -10  -8    1.80   10.30
  10   3   8    6.40    8.00
  10   2  -8   55.19   15.10
   2 -10  -8   17.70   11.90
  10   2   8   52.59   11.10
   1 -10  -8    2.00   10.10
  10   1  -8    8.00    9.40
  10   1   8    2.20    7.30
  10   0  -8   20.90   10.50
   0 -10  -8    6.90   11.00
  10   0   8    8.60    7.30
  10  -1  -8   16.10   10.50
  -1 -10  -8    0.10   10.40
  10  -1   8    8.30    7.30
  10  -2  -8   12.10    9.90
  -2 -10  -8   14.40   11.70
  10  -2   8    8.20    7.40
  10  -3  -8   22.60   10.50
  -3 -10  -8   13.50   12.40
  -4 -10  -8    3.90   11.40
  10  -4  -8   11.60   10.20
  10  -5  -8    6.10   10.00
  -5 -10  -8    7.10   11.90
   3 -11  -8   -7.00    8.80
  11   3   8   11.30    8.00
   2 -11  -8   -1.60    9.30
  11   2   8    7.70    7.90
   1 -11  -8    6.50   10.40
  11   1  -8   19.90   10.70
  11   1   8   -0.60    7.20
  11   0  -8   15.00   10.40
   0 -11  -8   -5.30    9.70
  11   0   8    4.70    7.10
  11  -1  -8    1.60    9.30
  -1 -11  -8    3.80   10.30
  11  -1   8   -5.20    6.40
  -2 -11  -8   -3.50   10.10
  11  -2  -8   10.30    9.80
  11  -2   8   -1.70    6.60
  -3 -11  -8    6.90   11.30
  11  -3  -8    5.20   10.00
   0   0  -9    6.90   10.90
  -1   0  -9    2.20   10.20
   0  -1  -9    8.70   11.50
   1   0  -9   10.80   11.20
  -1  -1  -9   14.40   12.20
   1  -1  -9   13.40   11.60
  -2  -1  -9    2.50   10.60
   1  -2  -9   16.80   11.30
   2   0  -9    3.40   10.00
  -2   0  -9    2.40   10.20
   0  -2  -9    0.90   10.80
  -1  -2  -9    1.90   10.60
   2  -1  -9   13.00   11.00
  -2  -2  -9    9.40   11.00
   2  -2  -9    6.80   10.10
   2  -3  -9   17.30   11.30
  -3  -2  -9    5.10   10.50
  -3  -1  -9    2.20   10.70
   1  -3  -9   18.20   11.50
  -3   0  -9    5.00   10.70
   0  -3  -9    1.60   10.70
   3   0  -9   11.10   10.60
  -1  -3  -9    1.30   10.70
   3  -1  -9    9.10   10.90
  -2  -3  -9   -1.20   10.00
   3  -2  -9   10.50   10.50
  -3  -3  -9    0.50   11.10
   3  -3  -9    6.70   10.60
  -4  -3  -9   -4.90   10.50
   3  -4  -9   -3.50    9.10
  -4  -2  -9    5.70   11.10
   2  -4  -9    4.80   10.20
  -4  -1  -9    6.00   11.10
   1  -4  -9    3.80   10.40
   4   0  -9    7.70   10.80
  -4   0  -9   -0.10   11.10
   0  -4  -9    3.10   10.80
  -1  -4  -9    6.70   10.70
   4  -1  -9   11.40   11.20
   4  -2  -9   18.30   11.00
  -2  -4  -9    4.00   11.00
   4  -3  -9    4.60   10.30
  -3  -4  -9    2.10   10.30
   2  -5  -9    5.70   10.30
   1  -5  -9   12.20   10.90
  -5  -1  -9   15.10   11.90
   0  -5  -9   11.70   11.00
   5   0  -9   10.00    9.90
   5  -1  -9   14.30   10.00
  -1  -5  -9    0.60   10.50
   5  -2  -9    0.50    9.00
  -2  -5  -9    5.50   10.70

_computing_structure_solution     'SHELXT 2014/4 (Sheldrick, 2014)'
;
_shelx_hkl_checksum                934
_olex2_submission_special_instructions  'No special instructions were received'
