# Supplementary material for: Various Approaches to Studying the Phase Transition in an Octamethylcyclotetrasiloxane Crystal: From X-ray Structural Analysis to Metadynamics
Source: Int J Mol Sci. 2022 Aug 13;23(16):9073. doi: 10.3390/ijms23169073 (PMC9408834; doi:10.3390/ijms23169073)
Supplement: Supplementary file 1 [file ijms-23-09073-s001.zip › 1-11_221.cif]

data_221
_audit_creation_date               2021-12-16
_audit_creation_method
;
Olex2 1.5
(compiled 2021.12.09 svn.r5202d8cf for OlexSys, GUI svn.r6439)
;
_shelxl_version_number             2014/6
_audit_contact_author_address      ?
_audit_contact_author_email        ?
_audit_contact_author_name         ''
_audit_contact_author_phone        ?
_publ_contact_author_id_orcid      ?
_publ_section_references
;
Dolomanov, O.V., Bourhis, L.J., Gildea, R.J, Howard, J.A.K. & Puschmann, H.
 (2009), J. Appl. Cryst. 42, 339-341.

Sheldrick, G.M. (2015). Acta Cryst. A71, 3-8.

Sheldrick, G.M. (2015). Acta Cryst. C71, 3-8.
;
_chemical_name_common              ?
_chemical_name_systematic          ?
_chemical_formula_moiety           'C8 H24 O4 Si4'
_chemical_formula_sum              'C8 H24 O4 Si4'
_chemical_formula_weight           296.63
_chemical_melting_point            ?
loop_
  _atom_type_symbol
  _atom_type_description
  _atom_type_scat_dispersion_real
  _atom_type_scat_dispersion_imag
  _atom_type_scat_source
 'C' 'C' 0.0033 0.0016 'International Tables Vol C Tables 4.2.6.8 and 6.1.1.4'
 'H' 'H' 0.0000 0.0000 'International Tables Vol C Tables 4.2.6.8 and 6.1.1.4'
 'O' 'O' 0.0106 0.0060 'International Tables Vol C Tables 4.2.6.8 and 6.1.1.4'
 'Si' 'Si' 0.0817 0.0704 'International Tables Vol C Tables 4.2.6.8 and 6.1.1.4'

_shelx_space_group_comment
;
The symmetry employed for this shelxl refinement is uniquely defined
by the following loop, which should always be used as a source of
symmetry information in preference to the above space-group names.
They are only intended as comments.
;
_space_group_crystal_system        'tetragonal'
_space_group_IT_number             86
_space_group_name_H-M_alt          'P 42/n'
_space_group_name_Hall             '-P 4bc'
loop_
  _space_group_symop_operation_xyz
 'x, y, z'
 '-x+1/2, -y+1/2, z'
 '-y, x+1/2, z+1/2'
 'y+1/2, -x, z+1/2'
 '-x, -y, -z'
 'x-1/2, y-1/2, -z'
 'y, -x-1/2, -z-1/2'
 '-y-1/2, x, -z-1/2'

_cell_length_a                     16.0690(19)
_cell_length_b                     16.0690(19)
_cell_length_c                     6.4719(17)
_cell_angle_alpha                  90
_cell_angle_beta                   90
_cell_angle_gamma                  90
_cell_volume                       1671.1(6)
_cell_formula_units_Z              4
_cell_measurement_reflns_used      2944
_cell_measurement_temperature      221
_cell_measurement_theta_max        29.637
_cell_measurement_theta_min        2.535
_shelx_estimated_absorpt_T_max     0.901
_shelx_estimated_absorpt_T_min     0.843
_exptl_absorpt_coefficient_mu      0.354
_exptl_absorpt_correction_T_max    0.7461
_exptl_absorpt_correction_T_min    0.5589
_exptl_absorpt_correction_type     multi-scan
_exptl_absorpt_process_details
;
SADABS-2014/5 (Bruker,2014/5) was used for absorption correction.
wR2(int) was 0.1583 before and 0.0647 after correction.
The Ratio of minimum to maximum transmission is 0.7491.
The \l/2 correction factor is 0.00150.
;
_exptl_absorpt_special_details     ?
_exptl_crystal_colour              colourless
_exptl_crystal_colour_primary      colourless
_exptl_crystal_density_diffrn      1.179
_exptl_crystal_density_meas        .
_exptl_crystal_density_method      ?
_exptl_crystal_description         block
_exptl_crystal_F_000               640
_exptl_crystal_preparation         ?
_exptl_crystal_recrystallization_method  ?
_exptl_crystal_size_max            0.5
_exptl_crystal_size_mid            0.3
_exptl_crystal_size_min            0.3
_exptl_transmission_factor_max     ?
_exptl_transmission_factor_min     ?
_diffrn_reflns_av_R_equivalents    0.0520
_diffrn_reflns_av_unetI/netI       0.0724
_diffrn_reflns_Laue_measured_fraction_full  0.989
_diffrn_reflns_Laue_measured_fraction_max  0.992
_diffrn_reflns_limit_h_max         23
_diffrn_reflns_limit_h_min         -16
_diffrn_reflns_limit_k_max         19
_diffrn_reflns_limit_k_min         -20
_diffrn_reflns_limit_l_max         8
_diffrn_reflns_limit_l_min         -9
_diffrn_reflns_number              10524
_diffrn_reflns_point_group_measured_fraction_full  0.989
_diffrn_reflns_point_group_measured_fraction_max  0.992
_diffrn_reflns_theta_full          25.242
_diffrn_reflns_theta_max           30.658
_diffrn_reflns_theta_min           1.792
_diffrn_ambient_temperature        221
_diffrn_detector                   'CCD area detector'
_diffrn_detector_area_resol_mean   8
_diffrn_detector_type              'Bruker SMART CCD 1K area detector'
_diffrn_measured_fraction_theta_full  0.989
_diffrn_measured_fraction_theta_max  0.992
_diffrn_measurement_device         'three-circle diffractometer'
_diffrn_measurement_device_type    'Bruker APEX-II CCD'
_diffrn_measurement_method         '\w and \f scans'
_diffrn_radiation_monochromator    graphite
_diffrn_radiation_probe            x-ray
_diffrn_radiation_type             MoK\a
_diffrn_radiation_wavelength       0.71073
_diffrn_source                     'sealed tube'
_diffrn_source_current             30.0
_diffrn_source_power               1.5
_diffrn_source_target              Mo
_diffrn_source_voltage             50.0
_reflns_Friedel_coverage           0.000
_reflns_Friedel_fraction_full      .
_reflns_Friedel_fraction_max       .
_reflns_number_gt                  1345
_reflns_number_total               2572
_reflns_special_details
;
 Reflections were merged by SHELXL according to the crystal
 class for the calculation of statistics and refinement.
 
 _reflns_Friedel_fraction is defined as the number of unique
 Friedel pairs measured divided by the number that would be
 possible theoretically, ignoring centric projections and
 systematic absences.
;
_reflns_threshold_expression       'I > 2\s(I)'
_computing_cell_refinement         'SAINT v8.34A (Bruker, 2013)'
_computing_data_collection         ?
_computing_data_reduction          'SAINT v8.34A (Bruker, 2013)'
_computing_molecular_graphics      'Olex2 1.5 (Dolomanov et al., 2009)'
_computing_publication_material    'Olex2 1.5 (Dolomanov et al., 2009)'
_computing_structure_refinement    'SHELXL 2014/6 (Sheldrick, 2015)'
_computing_structure_solution      'ShelXT (Sheldrick, 2015)'
_refine_diff_density_max           0.421
_refine_diff_density_min           -0.246
_refine_diff_density_rms           0.066
_refine_ls_extinction_coef         .
_refine_ls_extinction_method       none
_refine_ls_goodness_of_fit_ref     1.001
_refine_ls_hydrogen_treatment      constr
_refine_ls_matrix_type             full
_refine_ls_number_parameters       77
_refine_ls_number_reflns           2572
_refine_ls_number_restraints       0
_refine_ls_R_factor_all            0.1290
_refine_ls_R_factor_gt             0.0598
_refine_ls_restrained_S_all        1.001
_refine_ls_shift/su_max            0.001
_refine_ls_shift/su_mean           0.000
_refine_ls_structure_factor_coef   Fsqd
_refine_ls_weighting_details      
 'w=1/[\s^2^(Fo^2^)+(0.0624P)^2^+0.7900P] where P=(Fo^2^+2Fc^2^)/3'
_refine_ls_weighting_scheme        calc
_refine_ls_wR_factor_gt            0.1342
_refine_ls_wR_factor_ref           0.1599
_refine_special_details            ?
_olex2_refinement_description
;
1.a Idealised Me refined as rotating group:
 C1(H1A,H1B,H1C), C2(H2A,H2B,H2C), C3(H3A,H3B,H3C), C4(H4A,H4B,H4C)
;
_atom_sites_solution_hydrogens     geom
_atom_sites_solution_primary       dual
_atom_sites_solution_secondary     ?
loop_
  _atom_site_label
  _atom_site_type_symbol
  _atom_site_fract_x
  _atom_site_fract_y
  _atom_site_fract_z
  _atom_site_U_iso_or_equiv
  _atom_site_adp_type
  _atom_site_occupancy
  _atom_site_site_symmetry_order
  _atom_site_calc_flag
  _atom_site_refinement_flags_posn
  _atom_site_refinement_flags_adp
  _atom_site_refinement_flags_occupancy
  _atom_site_disorder_assembly
  _atom_site_disorder_group
 Si1 Si 0.43232(4) 0.88516(4) 0.48950(12) 0.0330(2) Uani 1 1 d . . . . .
 Si2 Si 0.61161(4) 0.93586(4) 0.36000(14) 0.0356(2) Uani 1 1 d . . . . .
 O1 O 0.38871(12) 0.97577(11) 0.5168(3) 0.0428(6) Uani 1 1 d . . . . .
 O2 O 0.51898(11) 0.89633(12) 0.3617(4) 0.0463(6) Uani 1 1 d . . . . .
 C1 C 0.36234(17) 0.81919(17) 0.3332(6) 0.0458(8) Uani 1 1 d . . . . .
 H1A H 0.3118 0.8081 0.4104 0.069 Uiso 1 1 calc R U . . .
 H1B H 0.3900 0.7671 0.3013 0.069 Uiso 1 1 calc R U . . .
 H1C H 0.3485 0.8478 0.2057 0.069 Uiso 1 1 calc R U . . .
 C2 C 0.4538(2) 0.83993(19) 0.7468(6) 0.0550(9) Uani 1 1 d . . . . .
 H2A H 0.4924 0.8754 0.8208 0.082 Uiso 1 1 calc R U . . .
 H2B H 0.4779 0.7850 0.7303 0.082 Uiso 1 1 calc R U . . .
 H2C H 0.4022 0.8356 0.8241 0.082 Uiso 1 1 calc R U . . .
 C3 C 0.6853(2) 0.8660(2) 0.4911(6) 0.0641(11) Uani 1 1 d . . . . .
 H3A H 0.7398 0.8919 0.4957 0.096 Uiso 1 1 calc R U . . .
 H3B H 0.6888 0.8138 0.4160 0.096 Uiso 1 1 calc R U . . .
 H3C H 0.6662 0.8553 0.6308 0.096 Uiso 1 1 calc R U . . .
 C4 C 0.6415(2) 0.9517(2) 0.0872(6) 0.0624(10) Uani 1 1 d . . . . .
 H4A H 0.6028 0.9900 0.0224 0.094 Uiso 1 1 calc R U . . .
 H4B H 0.6402 0.8988 0.0150 0.094 Uiso 1 1 calc R U . . .
 H4C H 0.6973 0.9746 0.0808 0.094 Uiso 1 1 calc R U . . .

loop_
  _atom_site_aniso_label
  _atom_site_aniso_U_11
  _atom_site_aniso_U_22
  _atom_site_aniso_U_33
  _atom_site_aniso_U_23
  _atom_site_aniso_U_13
  _atom_site_aniso_U_12
 Si1 0.0279(4) 0.0275(4) 0.0437(5) -0.0064(3) 0.0034(3) -0.0057(3)
 Si2 0.0272(4) 0.0307(4) 0.0489(5) -0.0092(4) 0.0078(3) -0.0018(3)
 O1 0.0401(11) 0.0325(10) 0.0559(15) -0.0121(9) 0.0007(10) 0.0005(8)
 O2 0.0323(10) 0.0445(11) 0.0622(16) -0.0137(11) 0.0124(10) -0.0081(8)
 C1 0.0390(16) 0.0409(16) 0.057(2) -0.0121(15) -0.0057(15) -0.0075(12)
 C2 0.067(2) 0.0513(19) 0.047(2) 0.0010(17) -0.0025(17) 0.0006(16)
 C3 0.055(2) 0.053(2) 0.085(3) -0.0206(19) -0.0112(19) 0.0179(16)
 C4 0.068(2) 0.067(2) 0.052(2) -0.0147(19) 0.0222(19) -0.0193(18)

_geom_special_details
;
 All esds (except the esd in the dihedral angle between two l.s. planes)
 are estimated using the full covariance matrix.  The cell esds are taken
 into account individually in the estimation of esds in distances, angles
 and torsion angles; correlations between esds in cell parameters are only
 used when they are defined by crystal symmetry.  An approximate (isotropic)
 treatment of cell esds is used for estimating esds involving l.s. planes.
;
loop_
  _geom_bond_atom_site_label_1
  _geom_bond_atom_site_label_2
  _geom_bond_distance
  _geom_bond_site_symmetry_2
  _geom_bond_publ_flag
 Si1 O1 1.6255(19) . ?
 Si1 O2 1.629(2) . ?
 Si1 C1 1.847(3) . ?
 Si1 C2 1.849(4) . ?
 Si2 O1 1.6286(19) 5_676 ?
 Si2 O2 1.6184(18) . ?
 Si2 C3 1.840(3) . ?
 Si2 C4 1.848(4) . ?
 O1 Si2 1.6286(19) 5_676 ?
 C1 H1A 0.9700 . ?
 C1 H1B 0.9700 . ?
 C1 H1C 0.9700 . ?
 C2 H2A 0.9700 . ?
 C2 H2B 0.9700 . ?
 C2 H2C 0.9700 . ?
 C3 H3A 0.9700 . ?
 C3 H3B 0.9700 . ?
 C3 H3C 0.9700 . ?
 C4 H4A 0.9700 . ?
 C4 H4B 0.9700 . ?
 C4 H4C 0.9700 . ?

loop_
  _geom_angle_atom_site_label_1
  _geom_angle_atom_site_label_2
  _geom_angle_atom_site_label_3
  _geom_angle
  _geom_angle_site_symmetry_1
  _geom_angle_site_symmetry_3
  _geom_angle_publ_flag
 O1 Si1 O2 108.97(11) . . ?
 O1 Si1 C1 108.13(12) . . ?
 O1 Si1 C2 109.54(13) . . ?
 O2 Si1 C1 107.79(13) . . ?
 O2 Si1 C2 109.93(14) . . ?
 C1 Si1 C2 112.40(15) . . ?
 O1 Si2 C3 107.97(14) 5_676 . ?
 O1 Si2 C4 110.40(14) 5_676 . ?
 O2 Si2 O1 109.63(11) . 5_676 ?
 O2 Si2 C3 110.44(15) . . ?
 O2 Si2 C4 107.46(15) . . ?
 C3 Si2 C4 110.95(18) . . ?
 Si1 O1 Si2 146.68(14) . 5_676 ?
 Si2 O2 Si1 146.38(15) . . ?
 Si1 C1 H1A 109.5 . . ?
 Si1 C1 H1B 109.5 . . ?
 Si1 C1 H1C 109.5 . . ?
 H1A C1 H1B 109.5 . . ?
 H1A C1 H1C 109.5 . . ?
 H1B C1 H1C 109.5 . . ?
 Si1 C2 H2A 109.5 . . ?
 Si1 C2 H2B 109.5 . . ?
 Si1 C2 H2C 109.5 . . ?
 H2A C2 H2B 109.5 . . ?
 H2A C2 H2C 109.5 . . ?
 H2B C2 H2C 109.5 . . ?
 Si2 C3 H3A 109.5 . . ?
 Si2 C3 H3B 109.5 . . ?
 Si2 C3 H3C 109.5 . . ?
 H3A C3 H3B 109.5 . . ?
 H3A C3 H3C 109.5 . . ?
 H3B C3 H3C 109.5 . . ?
 Si2 C4 H4A 109.5 . . ?
 Si2 C4 H4B 109.5 . . ?
 Si2 C4 H4C 109.5 . . ?
 H4A C4 H4B 109.5 . . ?
 H4A C4 H4C 109.5 . . ?
 H4B C4 H4C 109.5 . . ?

loop_
  _geom_torsion_atom_site_label_1
  _geom_torsion_atom_site_label_2
  _geom_torsion_atom_site_label_3
  _geom_torsion_atom_site_label_4
  _geom_torsion
  _geom_torsion_site_symmetry_1
  _geom_torsion_site_symmetry_2
  _geom_torsion_site_symmetry_3
  _geom_torsion_site_symmetry_4
  _geom_torsion_publ_flag
 O1 Si1 O2 Si2 64.6(3) . . . . ?
 O1 Si2 O2 Si1 -33.5(3) 5_676 . . . ?
 O2 Si1 O1 Si2 -77.0(3) . . . 5_676 ?
 C1 Si1 O1 Si2 166.1(3) . . . 5_676 ?
 C1 Si1 O2 Si2 -178.3(2) . . . . ?
 C2 Si1 O1 Si2 43.3(3) . . . 5_676 ?
 C2 Si1 O2 Si2 -55.5(3) . . . . ?
 C3 Si2 O2 Si1 85.3(3) . . . . ?
 C4 Si2 O2 Si1 -153.5(3) . . . . ?

_shelx_res_file
;
TITL 200_a.res in P4(2)/n
REM Old TITL 200 in P4(2)/n
REM SHELXT solution in P4(2)/n
REM R1 0.156, Rweak 0.004, Alpha 0.023, Orientation as input
REM Formula found by SHELXT: C2 O Si
CELL 0.71073 16.069 16.069 6.4719 90 90 90
ZERR 4 0.0019 0.0019 0.0017 0 0 0
LATT 1
SYMM 0.5-X,0.5-Y,+Z
SYMM -Y,0.5+X,0.5+Z
SYMM 0.5+Y,-X,0.5+Z
SFAC C H O Si
UNIT 32 96 16 16

L.S. 4
PLAN  5
SIZE 0.3 0.3 0.5
TEMP -52.15
CONF
BOND $H
list 4
fmap 2
acta
MORE -1
OMIT 4 14 0
OMIT -1 3 3
REM <olex2.extras>
REM <HklSrc "%.\\221.hkl">
REM </olex2.extras>

WGHT    0.062400    0.790000
FVAR       0.45415
SI1   4    0.432324    0.885162    0.489498    11.00000    0.02790    0.02748 =
         0.04371   -0.00644    0.00341   -0.00567
SI2   4    0.611613    0.935860    0.359996    11.00000    0.02719    0.03066 =
         0.04889   -0.00916    0.00784   -0.00180
O1    3    0.388710    0.975766    0.516814    11.00000    0.04005    0.03250 =
         0.05586   -0.01211    0.00075    0.00050
O2    3    0.518980    0.896328    0.361725    11.00000    0.03225    0.04454 =
         0.06221   -0.01367    0.01245   -0.00809
C1    1    0.362342    0.819186    0.333157    11.00000    0.03899    0.04091 =
         0.05739   -0.01209   -0.00573   -0.00751
AFIX 137
H1A   2    0.311812    0.808051    0.410351    11.00000   -1.50000
H1B   2    0.389968    0.767070    0.301294    11.00000   -1.50000
H1C   2    0.348499    0.847792    0.205730    11.00000   -1.50000
AFIX   0
C2    1    0.453776    0.839926    0.746766    11.00000    0.06670    0.05126 =
         0.04695    0.00095   -0.00253    0.00064
AFIX 137
H2A   2    0.492431    0.875414    0.820849    11.00000   -1.50000
H2B   2    0.477904    0.784992    0.730303    11.00000   -1.50000
H2C   2    0.402245    0.835643    0.824099    11.00000   -1.50000
AFIX   0
C3    1    0.685301    0.865967    0.491143    11.00000    0.05484    0.05278 =
         0.08464   -0.02059   -0.01120    0.01788
AFIX 137
H3A   2    0.739798    0.891863    0.495732    11.00000   -1.50000
H3B   2    0.688806    0.813846    0.416040    11.00000   -1.50000
H3C   2    0.666157    0.855338    0.630813    11.00000   -1.50000
AFIX   0
C4    1    0.641530    0.951698    0.087164    11.00000    0.06830    0.06670 =
         0.05231   -0.01466    0.02221   -0.01932
AFIX 137
H4A   2    0.602826    0.989988    0.022427    11.00000   -1.50000
H4B   2    0.640156    0.898803    0.015029    11.00000   -1.50000
H4C   2    0.697315    0.974619    0.080801    11.00000   -1.50000
AFIX   0
HKLF 4

REM  200_a.res in P4(2)/n
REM R1 =  0.0598 for    1345 Fo > 4sig(Fo)  and  0.1290 for all    2572 data
REM     77 parameters refined using      0 restraints

END

WGHT      0.0628      0.5364

REM Highest difference peak  0.421,  deepest hole -0.246,  1-sigma level  0.066
Q1    1   0.5290  0.8902  0.4950  11.00000  0.05    0.42
Q2    1   0.3902  0.9245  0.5132  11.00000  0.05    0.32
Q3    1   0.6100  0.9426  0.5143  11.00000  0.05    0.31
Q4    1   0.4414  0.8625  0.6189  11.00000  0.05    0.29
Q5    1   0.6642  0.9015  0.3751  11.00000  0.05    0.29
;
_shelx_res_checksum                13943
_shelx_hkl_file
;
   0   1   0   -4.60    0.20
   0  -1   0   -4.30    0.30
  -1  -1   0    2.90    0.40
  -1  -1   0    2.10    0.50
  -1   1   0    3.80    0.50
  -1   1   0    2.40    0.40
   1  -2   0   -4.40    1.20
  -2  -1   0   -8.70    1.00
   2   1   0   -7.30    1.20
  -2  -1   0   -4.30    1.40
  -1   2   0   -6.90    1.10
   1  -2   0   -5.80    1.10
   2   0   0 3974.80  185.38
   0  -2   0 4091.89  184.78
   0  -2   0 4013.20  186.18
  -2   0   0 4300.07  186.58
  -2   0   0 4074.79  186.88
   0   2   0 4112.99  186.58
   2   0   0 4146.59  187.38
  -1  -2   0   -1.10    0.70
   1   2   0   -0.60    0.30
   1   2   0   -1.70    0.70
   2  -2   0  145.19    7.20
  -2  -2   0  147.79    7.80
   2   2   0  144.69    7.20
  -2   2   0  148.99    7.40
   2  -2   0  151.98    7.50
   2   2   0  145.79    7.70
   2  -3   0   -1.30    0.80
  -2   3   0   -0.50    0.80
   2  -3   0   -1.60    0.70
  -3  -2   0   -0.60    1.00
   3   2   0   -0.40    1.00
   3   2   0   -0.90    0.60
  -1   3   0   -0.10    0.60
   1  -3   0    1.10    0.90
   3   1   0    2.60    0.80
   1  -3   0    1.40    0.90
  -1   3   0    0.80    0.90
  -3  -1   0   -0.10    0.90
   3   1   0    0.80    1.00
  -3   0   0   -0.50    0.50
   0  -3   0   -1.00    0.70
   0   3   0    0.00    0.60
   3   0   0   -0.50    0.50
   0   3   0   -1.00    0.60
   0  -3   0    0.10    0.70
   3   0   0   -0.30    0.40
  -1  -3   0    0.30    0.70
   3  -1   0    0.30    0.50
  -1  -3   0    0.10    0.70
   3  -1   0    0.30    0.60
  -3   1   0    0.60    0.60
  -1  -3   0   -0.60    0.90
   1   3   0   -0.20    0.60
   3  -2   0   -0.20    0.80
  -3  -3   0    7.00    2.10
   3   3   0    4.60    1.60
   3  -4   0   -0.40    1.20
   3  -4   0   -0.50    1.20
   4   3   0   -0.10    1.30
  -4  -3   0    4.90    1.90
  -3   4   0    0.00    1.10
   4   3   0   -1.20    1.00
   2  -4   0 9985.50  445.76
   4   2   0 9833.22  444.16
  -4  -2   0 9999.00  449.26
  -2   4   0 9808.42  446.56
   4   2   0 9830.02  448.66
   2  -4   0 9663.03  443.36
   0  -4   0 5363.26  248.28
   4   0   0 5581.44  251.57
   4   0   0 5409.96  248.68
   0  -4   0 5438.16  247.28
  -4   0   0 5561.94  251.47
   0   4   0 5850.21  247.68
   0   4   0 5301.67  250.87
   4  -1   0   -1.90    1.20
  -4   1   0   -1.90    1.00
   4  -2   0  325.27   14.00
   2   4   0  291.87   14.80
   4  -2   0  274.97   14.50
  -2  -4   0  302.17   15.20
   2   4   0  292.47   14.00
  -4   2   0  266.77   14.30
  -4   3   0   -1.20    0.90
   4  -3   0   -1.00    1.00
   3   4   0    0.00    1.00
  -3  -4   0   -0.40    1.30
   4  -3   0   -0.90    1.10
   3   4   0   -0.60    1.10
   4   4   0 1117.79   52.59
   4   4   0 1127.19   53.79
   4  -4   0 1158.08   53.19
  -4   4   0 1198.18   53.19
  -4  -4   0 1141.99   53.89
   4  -4   0 1166.08   52.69
   5   4   0   -0.80    1.20
   4  -5   0   -0.90    1.20
   5   4   0   -3.00    1.50
  -5  -4   0   -2.70    1.60
  -4   5   0   -0.40    1.20
   3  -5   0    7.30    1.90
   5   3   0   11.50    2.70
   3  -5   0   14.50    2.30
   5   3   0   11.20    1.80
  -3   5   0   11.00    2.10
  -5  -3   0    6.30    2.10
   2  -5   0   -1.80    1.30
   5   2   0   -3.00    1.40
   2  -5   0   -2.30    1.40
   5   2   0   -2.10    1.10
  -5  -2   0   -3.10    1.50
  -2   5   0   -2.10    1.20
   5   1   0    7.70    1.60
  -1   5   0    8.10    2.20
   1  -5   0   11.40    2.10
   1  -5   0    8.30    2.10
   5   1   0    6.30    2.30
  -5  -1   0    7.70    2.10
   0  -5   0    1.50    1.80
   0   5   0    0.60    1.50
   5   0   0    0.70    0.90
  -5   0   0    2.80    1.30
   0  -5   0    2.10    1.50
   5   0   0    0.10    1.50
  -5   1   0   30.30    3.10
  -1  -5   0   28.40    3.70
   5  -1   0   26.20    2.60
   5  -1   0   27.30    3.20
  -1  -5   0   32.30    3.40
  -1  -5   0   30.50    3.60
  -2  -5   0    1.40    1.90
   5  -2   0   -1.70    1.00
   5  -2   0    0.80    1.30
  -5   2   0    0.30    1.00
  -2  -5   0    3.00    2.10
   5  -3   0   67.79    5.10
   5  -3   0   65.09    4.60
  -3  -5   0   71.09    5.70
  -5   3   0   66.69    4.90
   3   5   0   88.99    5.80
  -4  -5   0    0.00    1.40
   5  -4   0   -1.10    1.20
  -5   4   0   -1.20    1.10
   5  -4   0   -0.40    1.20
   4   5   0    1.20    1.20
   4   5   0   -0.50    1.30
  -5  -5   0   10.90    3.10
   5  -5   0   10.20    2.40
   5  -5   0   10.40    2.10
   5   5   0    6.50    2.20
  -5   5   0    9.30    2.20
   5   5   0   10.70    1.90
   6   5   0    4.70    2.10
  -6  -5   0    1.90    1.90
   5  -6   0   -0.70    1.40
  -5   6   0   -0.80    1.30
   6   5   0    2.30    1.40
   5  -6   0   -3.80    1.60
   6   4   0 1115.49   52.99
  -4   6   0 1124.59   52.19
   4  -6   0 1131.89   51.59
  -6  -4   0 1122.79   53.09
   4  -6   0 1142.39   52.19
   6   4   0 1091.19   51.39
   3  -6   0   -1.60    1.40
  -6  -3   0   -0.90    1.30
  -3   6   0   -0.90    1.30
   6   3   0   -1.00    1.50
   3  -6   0    0.40    1.40
   6   3   0   -0.80    1.20
  -2   6   0 1748.72   79.79
   6   2   0 1694.33   78.79
  -6  -2   0 1742.33   80.19
   2  -6   0 1740.73   79.09
   2  -6   0 1742.53   79.59
   6   2   0 1766.62   80.29
  -1   6   0   -2.30    1.40
   6   1   0   -2.30    1.50
   6   1   0    1.00    1.20
   1  -6   0   -3.50    1.60
   1  -6   0   -3.00    1.50
  -6  -1   0   -2.60    1.30
   0   6   0  160.98    9.60
   0  -6   0  142.09    9.00
   0  -6   0  171.08    9.60
   6   0   0  170.98    9.70
  -6   0   0  169.28    9.50
   6   0   0  169.68    8.50
   6  -1   0   -1.20    1.20
  -1  -6   0   -5.20    1.90
  -1  -6   0   -4.90    2.00
   6  -1   0    1.70    1.90
  -1  -6   0   -5.10    1.70
  -6   1   0   -1.80    1.40
  -2  -6   0   -5.10    2.70
  -6   2   0    1.60    1.70
   6  -2   0   -0.70    1.60
   6  -2   0    2.50    1.90
  -2  -6   0    4.20    2.20
  -2  -6   0    4.50    2.50
   6  -3   0   -1.00    1.30
   3   6   0   -0.80    1.20
   3   6   0   -0.20    1.50
  -3  -6   0   -1.50    1.70
  -6   3   0   -1.80    1.20
   6  -4   0  907.01   40.20
   6  -4   0  844.42   39.20
  -6   4   0  893.81   39.90
  -4  -6   0  813.62   40.60
   4   6   0  805.52   40.40
   4   6   0  804.52   39.00
   5   6   0   -2.10    1.40
  -5  -6   0    0.30    2.00
   5   6   0    0.10    1.70
   6  -5   0   -2.10    1.30
  -6   5   0   -0.90    1.20
   6  -5   0    0.10    1.50
   6  -6   0  116.99    7.10
  -6  -6   0  107.09    8.40
   6   6   0  106.79    8.00
   6  -6   0  106.99    7.30
  -6   6   0  104.39    7.20
   6   6   0  100.49    6.50
  -7  -6   0   -0.40    2.10
   7   6   0   -0.20    2.00
   6  -7   0    0.50    2.00
   7   6   0    1.30    1.60
   6  -7   0   -0.30    1.70
  -6   7   0   -1.90    1.60
   7   5   0   -0.90    1.40
  -7  -5   0   -0.80    1.90
   5  -7   0   -1.10    1.80
   7   5   0    0.70    2.00
   5  -7   0    1.00    2.10
  -5   7   0   -3.20    1.30
  -4   7   0    0.20    1.50
   4  -7   0   -4.30    1.90
   4  -7   0   -0.60    1.60
   7   4   0   -0.90    1.70
   7   4   0    0.90    1.40
  -7  -4   0    0.50    1.90
   7   3   0   16.50    3.20
  -3   7   0   12.90    2.80
   3  -7   0   15.60    2.70
   3  -7   0   10.80    2.70
  -7  -3   0   18.60    3.20
   7   3   0   14.10    2.30
   2  -7   0    0.00    2.10
   2  -7   0    6.70    2.10
  -7  -2   0   -2.40    1.40
   7   2   0   -2.60    1.50
   7   2   0   -2.40    1.20
  -7  -1   0    1.10    1.60
   7   1   0   -0.40    1.50
   1  -7   0    2.50    2.00
  -1   7   0   -2.20    1.60
   1  -7   0   -0.40    1.80
   7   1   0    1.50    1.20
   7   0   0    3.30    1.40
   7   0   0    0.20    1.50
  -1  -7   0   23.20    3.50
  -1  -7   0   27.30    4.20
   7  -1   0   19.80    3.10
   7  -1   0   20.90    2.50
  -7   1   0   18.30    2.90
   7  -2   0   -0.70    1.30
  -2  -7   0   -1.80    2.50
  -7   2   0   -1.00    1.30
  -2  -7   0    0.00    2.10
  -2  -7   0    0.00    2.00
   7  -2   0   -1.00    1.60
   3   7   0    4.50    1.50
  -7   3   0    1.40    1.60
   7  -3   0    2.40    1.70
  -3  -7   0    6.00    2.50
   7  -3   0    2.50    1.90
  -3  -7   0    4.30    3.10
   7  -5   0    2.30    1.90
   7  -5   0    1.60    1.90
  -5  -7   0    1.00    2.10
   5   7   0    3.10    1.90
  -7   5   0    2.80    1.80
   5   7   0    1.70    2.10
  -7   6   0   -0.70    1.60
  -6  -7   0    0.30    2.40
   7  -6   0   -3.20    1.80
   6   7   0   -3.80    1.60
   6   7   0   -1.20    2.10
   7  -6   0   -2.60    1.80
  -7  -7   0   33.10    5.20
   7  -7   0   34.80    4.80
   7   7   0   41.50    5.80
   7   7   0   36.60    4.30
  -7   7   0   35.50    4.60
   7  -7   0   34.00    4.30
  -7   8   0   -0.80    2.00
   7  -8   0   -0.90    2.10
   7  -8   0    2.50    2.70
  -8  -7   0    2.40    3.10
   8   7   0   -2.60    1.90
   8   7   0    0.30    2.00
  -6   8   0  316.27   17.30
   6  -8   0  310.47   17.30
   8   6   0  315.07   18.30
   8   6   0  309.37   16.30
   6  -8   0  348.77   17.10
  -8  -6   0  329.67   18.60
   8   5   0   -2.40    1.90
  -8  -5   0   -1.50    2.30
   8   5   0   -2.60    2.00
   5  -8   0   -2.40    2.10
  -5   8   0   -3.80    1.90
   4  -8   0 1696.73   78.39
  -8  -4   0 1755.82   79.89
  -4   8   0 1660.53   78.99
   8   4   0 1684.33   77.89
   8   4   0 1720.23   79.99
   4  -8   0 1726.93   78.89
   8   3   0   -1.90    1.90
   8   3   0   -1.40    1.50
  -3   8   0   -1.20    1.70
  -8  -3   0   -0.10    2.00
   3  -8   0   -1.00    1.60
   3  -8   0   -1.90    1.90
  -2   8   0  830.62   41.30
   8   2   0  854.41   40.10
   2  -8   0  864.01   40.60
   2  -8   0  884.71   41.10
  -8  -2   0  874.11   41.70
   8   2   0  867.81   41.90
  -1   8   0   -1.50    1.80
   1  -8   0   -4.00    1.80
   8   1   0   -0.50    1.20
   8   1   0    1.40    1.90
  -8  -1   0   -1.00    1.70
   1  -8   0   -1.60    1.80
   0  -8   0   97.49    7.20
   0   8   0   81.99    6.70
   0  -8   0   84.29    6.50
   8   0   0   80.69    6.90
  -8   0   0   86.69    6.60
   8   0   0   78.49    5.30
  -1  -8   0   -1.20    2.00
  -8   1   0   -1.40    1.60
   8  -1   0   -1.10    1.30
  -1  -8   0   -0.10    2.50
  -1  -8   0   -0.80    2.00
   8  -1   0   -0.50    1.70
  -2  -8   0  244.68   14.60
   8  -2   0  264.87   13.20
  -8   2   0  275.87   14.20
   8  -2   0  253.17   14.40
  -2  -8   0  248.88   14.80
  -2  -8   0  246.48   14.10
  -3  -8   0   -0.80    2.00
   8  -3   0   -1.90    1.80
  -8   3   0   -0.80    1.40
   3   8   0    1.50    1.70
   8  -3   0   -1.30    1.70
  -3  -8   0    0.80    2.80
  -4  -8   0  857.91   40.00
   8  -4   0  801.02   39.40
  -4  -8   0  823.92   40.20
  -8   4   0  808.62   38.90
   8  -4   0  797.92   38.20
   4   8   0  803.62   37.90
  -5  -8   0    1.40    2.60
   5   8   0   -3.80    1.60
   5   8   0   -1.50    2.10
   8  -5   0   -3.10    1.90
   8  -5   0    1.20    2.20
  -8   5   0   -1.10    1.50
   6   8   0    7.80    2.50
  -8   6   0    7.50    2.50
   8  -6   0    7.80    2.90
   8  -6   0    6.50    2.80
  -6  -8   0    6.80    4.00
   6   8   0    7.10    3.00
   8  -7   0   -2.10    2.30
  -7  -8   0   -1.60    2.90
   7   8   0   -0.80    2.20
   8  -7   0    0.70    2.40
   7   8   0   -3.10    1.90
  -8   7   0   -1.40    2.00
   8  -8   0 1576.14   70.99
  -8  -8   0 1575.84   73.19
   8   8   0 1504.55   70.19
   8   8   0 1440.76   72.39
  -8   8   0 1544.65   71.59
   8  -8   0 1511.65   71.69
   8  -9   0   -1.30    2.50
  -9  -8   0   -1.00    3.40
   9   8   0   -0.40    3.10
   8  -9   0   -5.30    3.60
  -8   9   0   -0.80    2.70
   9   8   0   -1.00    2.90
  -7   9   0   68.69    7.00
   6  -9   0   -1.50    2.20
  -6   9   0   -0.20    2.30
   9   6   0    2.50    2.30
   9   6   0   -2.60    2.50
   6  -9   0   -5.00    3.00
  -9  -6   0   -4.20    2.80
   5  -9   0   10.90    3.20
   5  -9   0   13.30    3.80
  -5   9   0   18.50    3.80
   9   5   0   17.50    4.50
  -9  -5   0   13.60    4.00
   9   5   0   17.90    3.10
   9   4   0    0.00    2.50
   4  -9   0   -0.80    2.00
   9   4   0    4.30    2.00
   4  -9   0   -6.60    2.60
  -9  -4   0    6.20    2.70
  -4   9   0   -0.90    2.10
   9   3   0   10.50    2.40
   3  -9   0    7.00    2.60
  -3   9   0    9.90    3.10
   9   3   0    6.70    2.90
  -9  -3   0   14.80    3.40
  -9  -2   0   -0.60    1.80
   2  -9   0    2.00    2.40
   9   2   0   -0.20    2.10
   9   2   0   -0.70    1.50
   2  -9   0   -2.60    2.40
  -2   9   0    1.10    1.90
  -9  -1   0   32.40    4.50
  -1   9   0   26.60    4.40
   9   1   0   30.70    3.60
   1  -9   0   33.70    4.70
   9   1   0   41.30    5.60
   1  -9   0   32.80    4.20
   0  -9   0   -1.90    2.50
   9   0   0    0.00    1.60
  -2  -9   0    0.10    2.40
  -2  -9   0   -3.60    3.30
   9  -2   0    0.90    2.20
  -9   2   0    0.90    1.90
   9  -2   0   -0.10    1.90
  -2  -9   0   -0.10    2.90
   9  -3   0    7.80    2.30
  -9   3   0    5.30    2.40
  -3  -9   0    0.80    3.90
   9  -3   0    2.40    2.60
   3   9   0    2.90    2.10
  -3  -9   0    2.30    3.60
   4   9   0    1.20    2.20
  -9   4   0   -1.30    1.80
  -4  -9   0    1.10    3.30
   9  -4   0   -0.10    2.30
  -5  -9   0   15.20    4.00
  -9   5   0    3.70    2.50
   9  -5   0    4.90    2.80
   5   9   0   12.90    2.90
   9  -5   0    5.10    2.70
   6   9   0    0.30    2.00
   9  -6   0   -0.40    2.40
   6   9   0   -2.20    2.40
  -9   6   0   -3.00    1.80
  -6  -9   0   -0.80    3.00
   7   9   0    3.20    3.50
  -9   7   0   -1.90    2.30
   9  -7   0    2.30    3.10
   7   9   0    3.70    2.60
   9  -7   0    5.40    3.30
  -7  -9   0    1.00    4.60
   9  -8   0    2.60    3.10
  -9   8   0    3.30    2.80
  -9  -9   0    1.50    3.80
   9   9   0   -2.80    2.90
   9  -9   0   -0.20    3.70
  -9   9   0    1.70    2.70
   9   9   0    2.70    3.10
   9  -9   0    1.20    3.20
  10   9   0    1.20    3.30
 -10  -9   0   -1.30    3.90
   9 -10   0   -0.80    3.90
  -8  10   0 1109.59   53.69
   8 -10   0 1090.19   53.49
  10   8   0 1132.09   52.09
 -10  -8   0 1118.19   55.19
  10   8   0 1066.69   54.69
   8 -10   0 1142.29   53.19
  10   7   0   -0.70    3.10
  10   7   0    3.20    2.70
  -7  10   0   -0.20    2.80
   7 -10   0    1.00    2.70
 -10  -7   0   -0.40    3.60
 -10  -6   0  472.35   25.10
  10   6   0  463.05   25.10
   6 -10   0  443.96   23.60
  -6  10   0  426.86   23.60
  10   6   0  433.96   22.40
   6 -10   0  444.86   23.60
  10   5   0   -1.10    2.10
  -5  10   0    0.30    2.60
  10   5   0   -3.60    3.00
 -10  -5   0   -4.60    2.80
   5 -10   0    1.10    3.20
   5 -10   0   -3.50    2.50
   4 -10   0 2254.67  104.99
  -4  10   0 2233.08  105.29
  10   4   0 2286.07  103.79
 -10  -4   0 2290.27  106.19
   4 -10   0 2295.67  104.39
  10   4   0 2302.37  106.29
  10   3   0    6.00    3.10
 -10  -3   0    4.60    2.70
  10   3   0    1.60    2.10
  -3  10   0    3.40    3.00
   3 -10   0   -0.20    2.50
   3 -10   0   -6.20    3.20
   2 -10   0 2499.25  115.49
  -2  10   0 2525.95  116.19
   2 -10   0 2496.05  114.89
  10   2   0 2526.95  114.39
 -10  -2   0 2568.84  116.39
  10   2   0 2483.05  116.59
  10   1   0   -1.10    1.80
  10   1   0    0.40    2.50
 -10  -1   0   -2.30    2.50
   1 -10   0    3.70    3.10
  -1  10   0   -0.50    3.00
   0 -10   0   29.40    5.00
   0 -10   0   44.20    5.90
  10   0   0   28.00    5.00
  10   0   0   34.40    4.20
 -10   0   0   42.70    5.60
  10  -1   0   -0.20    2.40
  -1 -10   0   -5.80    3.80
  -1 -10   0   -1.20    3.30
 -10   1   0   -2.50    2.10
  -1 -10   0    7.10    3.80
  10  -1   0   -1.90    1.90
  -2 -10   0  219.28   12.80
  -2 -10   0  194.38   12.80
 -10   2   0  176.28   11.70
  10  -2   0  180.68   10.70
  -2 -10   0  187.08   13.20
  10  -2   0  181.88   12.30
   3  10   0   -1.30    2.00
 -10   3   0   -0.40    1.90
  -3 -10   0   -5.60    3.40
  10  -3   0   -0.70    2.50
  10  -3   0    1.80    2.70
  -3 -10   0   -7.20    3.70
   4  10   0  232.08   12.60
  -4 -10   0  231.38   15.20
  10  -5   0    0.40    2.70
 -10   5   0   -1.50    2.20
  -5 -10   0   -0.90    3.50
  -5 -10   0    0.30    3.30
   5  10   0    4.70    2.50
  10  -5   0    0.50    2.60
   6  10   0   57.39    6.30
  10  -6   0   50.29    5.90
 -10   6   0   51.29    6.30
  10  -6   0   55.49    6.90
  -6 -10   0   45.00    7.20
  -7 -10   0   -5.70    4.00
  10  -7   0   -2.00    2.90
   7  10   0   -7.20    2.80
 -10   8   0   82.59    7.90
   8  10   0   80.39    7.30
  -8 -10   0   84.89   10.30
   8  10   0   79.59    9.60
  10  -8   0   84.99    8.30
  10  -8   0   86.19    8.70
  -9 -10   0   -0.90    3.60
   9  10   0    1.00    3.60
   9  10   0   -0.20    2.90
  10  -9   0    6.50    3.60
 -10   9   0   -1.20    2.70
  10  -9   0   -0.50    3.80
  10  10   0   26.50    5.70
  10 -10   0   30.30    5.90
 -10 -10   0   34.00    6.60
  10  10   0   29.70    4.70
  10 -11   0   -6.20    3.60
  11  10   0    2.70    2.90
  11   9   0   16.60    5.80
   9 -11   0   17.70    5.00
  11   9   0   21.40    4.00
 -11  -9   0   16.50    5.10
 -11  -8   0    9.40    3.90
   8 -11   0   -7.80    3.90
   8 -11   0   -3.30    2.60
  11   8   0   -4.10    2.90
  11   8   0   -6.20    2.70
  -8  11   0   -0.60    2.90
 -11  -7   0    0.30    3.40
  11   7   0   -0.80    2.70
   7 -11   0   -2.10    4.30
   7 -11   0   -0.50    2.80
  -7  11   0    4.60    3.40
  11   7   0    2.30    3.40
  -6  11   0   -0.50    2.70
   6 -11   0   -2.50    3.70
 -11  -6   0   -1.60    3.00
  11   6   0   -2.80    2.50
  11   6   0    2.50    3.70
   6 -11   0    0.70    2.60
   5 -11   0   36.00    5.70
  11   5   0   41.90    6.40
   5 -11   0   30.00    4.90
  -5  11   0   33.80    5.30
 -11  -5   0   37.90    6.10
  11   5   0   37.90    4.60
  11   4   0    0.10    2.40
 -11  -4   0   -5.30    2.60
   4 -11   0   -4.30    2.60
  11   4   0   -3.70    3.30
   3 -11   0   -4.50    2.90
  -3  11   0   -2.50    3.50
   3 -11   0    2.60    4.10
  11   3   0   -3.30    3.30
 -11  -3   0    3.20    3.50
  11   3   0    4.40    2.60
 -11  -2   0    1.20    2.70
   2 -11   0    1.40    3.90
  11   2   0    8.90    2.70
  11   2   0    3.00    3.30
  11   1   0   10.30    2.90
  -1  11   0    6.10    3.40
   1 -11   0   13.00    3.90
  11   1   0   10.10    4.20
   1 -11   0    4.00    4.70
 -11  -1   0   10.20    3.70
   0 -11   0   -1.60    3.20
  11   0   0   -0.80    2.20
 -11   0   0    0.80    2.60
   0 -11   0   -4.40    3.60
  11   0   0   -4.70    2.90
  -1 -11   0   -6.90    3.90
 -11   1   0    1.60    2.50
  11  -1   0    1.30    2.90
  -1 -11   0   -2.80    3.20
  -1 -11   0   -2.50    4.20
  11  -1   0   -1.70    2.30
  11  -2   0    3.70    2.50
  11  -2   0    2.80    3.20
 -11   2   0    1.10    2.70
  11  -3   0   14.20    4.40
   3  11   0   14.90    3.10
  -3 -11   0    8.60    5.40
  11  -3   0    5.50    3.10
  -3 -11   0   15.10    4.90
 -11   3   0    5.00    3.10
  -4 -11   0   -4.50    4.80
 -11   4   0   -6.60    2.50
  11  -4   0   -6.50    3.50
  -4 -11   0    5.80    5.30
  11  -4   0   -5.50    2.60
  11  -5   0   39.10    5.50
 -11   5   0   43.60    6.10
  11  -5   0   57.59    7.40
  11  -6   0    2.20    3.20
  11  -6   0   -2.00    2.90
 -11   6   0   -3.80    2.40
  -6 -11   0    6.30    4.10
   7  11   0   21.30    3.90
  -7 -11   0   16.30    5.60
 -11   7   0   16.80    4.40
  11  -7   0   22.50    5.10
  -7 -11   0   18.40    5.60
  11  -8   0   -2.10    3.10
 -11   8   0    5.60    3.10
  -8 -11   0   -5.80    4.20
   8  11   0    0.80    3.40
  11  -8   0    0.90    3.40
   8  11   0    0.60    3.30
   9  11   0    6.60    4.40
  -9 -11   0    4.10    4.20
  11  -9   0    2.90    3.80
  10  11   0   -5.40    2.60
  11 -10   0   -1.40    3.60
  11  11   0    0.80    2.80
  11 -11   0   -5.30    3.80
  12  11   0   -2.60    2.80
  11 -12   0    0.40    4.30
  12  10   0   24.90    4.40
  10 -12   0   20.10    5.80
  12   9   0    1.50    2.80
   9 -12   0    1.10    4.10
   8 -12   0   -1.80    4.20
  12   8   0    6.30    3.10
   7 -12   0   -3.80    4.20
   7 -12   0    1.50    4.40
  -7  12   0   -1.50    2.70
  12   7   0   -0.60    2.60
 -12  -7   0    0.50    3.30
  12   7   0   -2.20    3.40
  12   6   0  274.17   16.00
   6 -12   0  276.67   17.50
 -12  -6   0  300.57   18.80
   6 -12   0  300.87   17.40
  -6  12   0  291.77   17.60
  12   6   0  309.47   19.10
  12   5   0   -4.10    3.40
 -12  -5   0   -1.30    3.10
  -5  12   0    2.40    3.00
   5 -12   0   -2.80    3.90
   5 -12   0   -1.90    2.50
  12   5   0   -1.80    2.50
   4 -12   0   84.29    8.60
 -12  -4   0   69.69    8.30
  -4  12   0   73.89    8.50
  12   4   0   75.99    6.60
   4 -12   0   74.69    7.70
  12   4   0   70.29    8.80
  12   3   0   -0.20    2.50
  -3  12   0   -5.70    3.60
  12   3   0   -4.30    3.10
   3 -12   0   -0.40    3.60
   3 -12   0   -6.70    2.90
 -12  -3   0   -0.40    3.20
  12   2   0 1234.78   59.79
  12   2   0 1241.08   56.99
 -12  -2   0 1264.67   59.29
   2 -12   0 1162.88   58.19
  -2  12   0 1217.18   59.19
   2 -12   0 1204.38   57.59
  12   1   0    0.70    2.60
 -12  -1   0   -2.10    2.80
   1 -12   0    0.10    3.70
   1 -12   0  -11.30    4.00
  12   1   0    0.90    3.40
  -1  12   0    1.40    3.20
   0 -12   0  183.48   12.90
  12   0   0  189.88   11.30
  12   0   0  169.18   13.30
 -12   0   0  190.98   12.80
   0 -12   0  181.48   13.20
  -1 -12   0  -10.80    5.10
  -1 -12   0    3.20    5.10
  12  -1   0   -5.00    2.80
  12  -1   0   -5.10    3.40
  -1 -12   0    5.10    4.80
 -12   1   0   -2.60    2.80
  -2 -12   0 2267.47  104.59
 -12   2   0 2330.07  105.29
  -2 -12   0 2281.07  105.49
  12  -2   0 2203.38  103.69
  12  -2   0 2201.28  105.99
  -2 -12   0 2314.17  106.29
  -3 -12   0    5.80    4.10
  12  -3   0   -0.70    2.90
 -12   3   0   -2.60    2.50
   3  12   0    4.80    2.80
  -3 -12   0    8.10    5.00
  12  -3   0   -4.00    3.00
   4  12   0  289.37   15.30
  12  -4   0  289.47   17.80
  -4 -12   0  295.67   19.90
  -4 -12   0  270.67   18.10
 -12   4   0  280.27   16.50
  12  -4   0  269.87   15.70
  -5 -12   0    9.70    5.20
   5  12   0    5.70    3.10
  -5 -12   0    5.10    5.20
  12  -5   0   -3.80    3.00
  12  -5   0   -5.20    3.30
  12  -6   0  512.25   26.20
 -12   6   0  514.95   26.80
  -6 -12   0  506.95   28.10
  -6 -12   0  503.25   28.90
  12  -6   0  506.25   28.00
   6  12   0  508.75   25.20
  12  -7   0   -1.90    3.40
   7  12   0    2.20    3.00
  -7 -12   0   -6.40    4.10
  -8 -12   0  885.41   46.30
   8  12   0  887.01   42.40
  12  -8   0  897.61   43.70
  12  -9   0   -1.10    3.70
   9  12   0   -0.80    2.90
  12 -10   0   62.69    8.10
  10  12   0   58.19    6.80
  11  12   0   -5.20    2.90
  12  12   0    3.70    3.70
  12 -12   0    6.00    5.20
  13  12   0    0.30    3.40
  12 -13   0    5.80    5.60
  13  11   0   -2.60    3.00
  11 -13   0   -2.90    4.70
  10 -13   0   -1.10    4.50
  13  10   0   -0.40    3.10
   9 -13   0    3.60    5.00
  13   9   0   12.10    3.60
   8 -13   0   -7.10    4.00
  13   8   0   -5.40    2.90
   7 -13   0    1.90    4.30
  13   7   0   17.40    3.60
  13   6   0    1.80    2.80
   6 -13   0   -8.40    4.00
   5 -13   0   11.00    4.00
  -5  13   0   10.20    4.40
   5 -13   0    6.50    4.60
  13   5   0    8.30    5.80
  13   5   0   12.10    3.40
 -13  -5   0    9.70    4.40
  -4  13   0   -3.00    3.10
   4 -13   0   -2.30    3.60
  13   4   0   -4.30    3.30
   4 -13   0   -4.00    2.60
  13   4   0    0.40    2.60
 -13  -4   0   -3.80    2.60
   3 -13   0   20.30    5.10
  13   3   0   19.90    3.90
   3 -13   0   14.30    4.30
 -13  -3   0   22.10    5.10
  -3  13   0   18.00    5.40
  13   3   0   17.60    5.00
   2 -13   0   11.60    4.30
 -13  -2   0    4.70    3.40
   2 -13   0   11.70    3.60
  13   2   0   11.70    3.30
  13   2   0    3.30    3.50
  -2  13   0    2.40    3.70
  13   1   0    4.30    3.50
   1 -13   0    1.20    3.60
  13   1   0   -4.50    2.80
 -13  -1   0   -2.40    2.80
  13   0   0    3.90    3.60
 -13   0   0    0.90    3.20
  13   0   0   -1.30    3.00
   0 -13   0    2.70    3.80
   0 -13   0    2.30    5.00
   0 -13   0    3.60    4.10
 -13   1   0   -1.70    3.60
  13  -1   0    4.80    3.20
  -1 -13   0    7.50    4.70
  -1 -13   0    3.10    4.20
  -1 -13   0   -0.20    5.00
  13  -1   0    0.70    3.80
  13  -2   0    1.50    3.60
  13  -2   0   12.40    3.50
  -2 -13   0   14.90    5.20
 -13   2   0   -2.40    3.20
  13  -3   0    2.80    4.00
  13  -3   0    0.80    3.70
  -3 -13   0   27.50    6.90
 -13   3   0    2.50    3.50
  -3 -13   0   23.50    6.00
  -4 -13   0    5.90    4.90
  13  -4   0   10.00    3.60
  -4 -13   0    9.10    7.20
   5  13   0   54.09    6.00
  13  -5   0   50.09    6.50
  -5 -13   0   62.49   10.10
  -5 -13   0   59.69    9.20
   6  13   0    3.40    3.10
  -6 -13   0    5.50    4.50
  13  -6   0    2.30    3.50
  -7 -13   0    9.60    5.20
   7  13   0   17.20    3.90
   8  13   0   -1.80    3.10
  13  -8   0    7.50    4.30
   9  13   0   14.90    4.10
  13  -9   0   12.90    5.20
  13 -10   0    2.40    4.70
  10  13   0    0.90    3.20
  11  13   0   17.70    4.30
  13 -11   0   15.40    5.80
  12  13   0    1.00    3.30
  13 -12   0   -4.40    5.00
  13 -13   0    2.00    5.50
  13  13   0   -2.20    3.40
  13 -14   0    8.00    6.50
  14  13   0   -1.70    3.60
  12 -14   0   35.50    7.80
  14  12   0   30.30    5.40
  11 -14   0    3.60    5.70
  14  11   0   -2.20    3.30
  14  10   0  450.85   24.00
  10 -14   0  470.85   26.70
  14   9   0    0.00    3.00
   9 -14   0   -7.20    4.40
  14   8   0   97.59    8.40
   8 -14   0   93.69   10.80
  14   7   0   -0.10    3.00
   7 -14   0   -5.00    4.30
   6 -14   0   77.19    9.70
  14   6   0   87.49    7.80
   5 -14   0   -6.90    3.90
  14   5   0   -2.30    2.80
  14   4   0  253.17   14.50
   4 -14   0  242.18   15.50
  14   3   0    0.00    2.70
  -3  14   0   -4.20    4.00
   3 -14   0   -2.50    3.90
  -2  14   0    0.10    3.10
   2 -14   0   -3.30    4.20
   2 -14   0    4.10    3.60
  14   2   0    5.30    3.10
  14   1   0   -1.70    2.70
   1 -14   0    0.30    3.70
   1 -14   0   -4.70    4.40
   0 -14   0   74.09    8.30
   0 -14   0   67.89    9.40
  14   0   0   48.00    6.60
   0 -14   0   60.69    8.30
  -1 -14   0   -2.20    5.10
  -1 -14   0   -2.70    3.70
  14  -1   0   -1.80    2.90
  -1 -14   0    1.00    3.80
  14  -2   0  478.25   24.90
  -2 -14   0  482.75   26.90
  -2 -14   0  477.55   27.90
  14  -3   0    3.00    3.30
   3  14   0    1.90    2.90
  -3 -14   0   -2.50    5.10
  -3 -14   0   -4.60    4.50
   4  14   0  166.88   10.80
  -4 -14   0  195.98   14.40
  14  -5   0   -1.90    3.60
  -5 -14   0   -2.60    4.80
   5  14   0   -2.30    3.10
   6  14   0  184.98   11.40
  14  -6   0  179.08   13.00
  -6 -14   0  196.08   15.90
   7  14   0    0.30    3.30
  14  -7   0   -1.60    3.90
   8  14   0  254.27   15.90
  14  -8   0  336.47   18.60
  14  -9   0   -1.50    4.50
   9  14   0    4.70    3.40
  10  14   0   56.69    6.90
  14 -10   0   12.50    6.00
  14 -11   0   -5.30    4.80
  11  14   0    4.90    3.20
  12  14   0  269.77   15.60
  14 -12   0  242.18   18.50
  14 -13   0    3.10    6.00
  13  14   0    6.30    3.90
  14 -14   0  208.38   18.10
  14  14   0  200.88   13.60
  15  14   0   -3.00    3.70
  15  13   0   -2.90    3.70
  13 -15   0   -3.60    8.90
  15  12   0   -5.50    3.50
  12 -15   0    2.70    7.90
  15  11   0    5.50    3.90
  11 -15   0    4.60    6.40
  10 -15   0   -2.80    5.70
  15  10   0    0.60    3.50
   9 -15   0    2.80    5.60
  15   9   0    7.70    3.80
   8 -15   0    1.30    5.50
  15   8   0   -1.10    3.00
   7 -15   0   30.00    6.70
  15   7   0   24.40    5.00
  15   6   0    4.30    3.40
   6 -15   0   -6.10    5.00
   5 -15   0   -1.80    5.10
  15   5   0    3.10    3.30
  15   4   0    0.50    3.10
   4 -15   0   -1.80    5.90
  15   3   0   -1.90    2.80
  15   2   0   -0.80    2.80
  15   1   0    1.10    3.00
   0 -15   0   -5.80    3.70
  15   0   0    1.90    3.00
  15  -1   0    8.00    3.70
  -1 -15   0    6.10    4.20
  15  -2   0    4.40    3.60
  -2 -15   0    2.90    5.00
  -3 -15   0   -3.50    5.20
  15  -3   0   -4.80    3.50
  15  -4   0    0.40    3.60
  -4 -15   0  -11.60    5.30
  15  -5   0    6.30    4.30
  15  -6   0    6.90    4.20
  15  -7   0   -3.00    4.10
  15  -8   0    0.00    4.30
  15  -9   0   11.10    5.80
  15 -10   0   -5.00    5.10
  15 -11   0    4.50    5.60
  15 -12   0   -0.50    5.50
  15 -13   0    3.20    6.40
  15 -14   0    5.50    7.00
  16  14   0   13.30    5.00
  16  13   0   -5.50    3.60
  16  12   0    7.80    4.50
  16  11   0   -1.80    3.70
  16  10   0  136.09   11.00
  16   9   0   -0.70    3.50
  16   8   0   45.50    6.20
  16   7   0   -1.00    3.50
  16   6   0   83.99    8.50
  16   5   0   -3.10    3.20
  16   4   0  387.06   21.20
  16   3   0    4.30    3.50
  16   2   0   58.19    7.50
  16   1   0    2.60    3.40
   1 -16   0   -3.20    3.90
   0 -16   0  312.37   20.80
  16   0   0  283.87   17.10
  -1 -16   0    3.60    4.10
  16  -1   0   -2.60    3.50
  -2 -16   0  143.89   15.90
  16  -2   0  148.59   11.40
  16  -3   0   -2.00    3.90
  16  -4   0   19.30    5.20
  16  -5   0   -0.90    4.20
  16  -6   0   13.20    5.20
  16  -7   0    0.50    4.40
  16  -8   0   -7.20    4.30
  16  -9   0   -5.30    5.10
  16 -10   0   51.69    9.10
  16 -11   0   -6.00    5.50
  16 -12   0  141.19   15.10
  16 -13   0    3.40    6.40
  16 -14   0   49.90   10.40
  17  14   0   -6.10    4.90
  17  13   0    3.30    4.10
  17  12   0   -1.30    4.00
  17  11   0    1.20    4.10
  17  10   0   -4.50    3.60
  17   9   0   -1.00    3.70
  17   8   0   -3.00    3.60
  17   7   0    5.30    4.10
  17   6   0   -0.10    3.60
  17   5   0    2.70    3.80
  17   4   0    5.60    3.90
  17   3   0    4.60    3.90
  17   2   0   -2.70    3.60
  17   1   0    4.10    4.20
  17   0   0    4.40    4.30
  17  -1   0   -5.90    3.90
  17  -2   0    0.00    4.50
  17  -3   0    8.90    4.80
  17  -4   0   -6.10    4.30
  17  -5   0    5.80    5.10
  17  -6   0   -1.00    4.50
  17  -7   0    4.00    5.20
  17  -8   0    6.20    5.60
  17  -9   0   -4.40    5.40
  17 -10   0    2.30    6.10
  17 -11   0    8.80    6.50
  17 -12   0    3.90    6.30
  17 -13   0    4.60    7.60
  17 -14   0    2.30    7.30
  18  13   0   -1.80    4.40
  18  12   0   24.90    5.90
  18  11   0   -2.30    4.10
  18  10   0   86.39    9.70
  18   9   0    0.50    4.10
  18   8   0   -4.00    3.70
  18   7   0   -3.70    3.90
  18   6   0    3.40    4.20
  18   5   0   -5.80    4.20
  18   4   0   -0.90    4.10
  18   3   0    0.30    4.50
  18   2   0   46.70    7.20
  18   1   0    2.90    4.40
  18   0   0  181.98   14.00
  18  -1   0    4.80    4.70
  18  -2   0  188.28   14.60
  18  -3   0   -1.40    4.70
  18  -4   0    1.30    4.90
  18  -5   0    1.30    4.90
  18  -6   0  153.08   14.00
  18  -7   0    0.20    5.60
  18  -8   0  101.69   13.10
  18  -9   0  -10.40    6.10
  18 -10   0   -1.00    6.60
  18 -11   0    0.20    6.70
  18 -12   0   34.30    9.50
  18 -13   0   -3.50    7.60
  18 -14   0    7.40    8.70
  19  13   0    2.90    5.10
  19  12   0   -5.40    4.40
  19  11   0    3.50    5.00
  19  10   0    2.90    4.90
  19   9   0   21.50    5.90
  19   8   0   11.60    5.00
  19   7   0    4.40    4.70
  19   6   0    2.30    4.70
  19   5   0    2.40    4.80
  19   4   0   -3.10    4.60
  19   3   0    4.20    4.80
  19   2   0   -0.70    4.70
  19   1   0    0.30    4.70
  19   0   0    0.40    4.90
  19  -1   0  -11.70    4.70
  19  -2   0   -1.90    5.00
  19  -3   0    2.90    5.00
  19  -4   0   -0.50    5.00
  19  -5   0    2.90    5.80
  19  -6   0    3.50    6.10
  19  -7   0    2.70    6.00
  19  -8   0   -7.30    6.20
  19  -9   0   -1.60    6.60
  19 -10   0   -9.50    6.90
  19 -11   0   10.20    7.60
  19 -12   0    6.90    7.70
  19 -13   0    4.30    7.90
  20  11   0   11.50    5.80
  20  10   0  190.08   15.40
  20   9   0    1.40    5.20
  20   8   0    1.60    5.00
  20   7   0    1.70    5.00
  20   6   0  173.08   14.40
  20   5   0    6.20    5.40
  20   4   0  115.89   12.40
  20   3   0    3.60    5.40
  20   2   0    9.10    5.80
  20   1   0   -8.10    4.80
  20   0   0   30.90    7.20
  20  -1   0    0.30    5.20
  20  -2   0   -7.70    5.00
  20  -3   0    4.50    5.80
  20  -4   0   -1.40    5.60
  20  -5   0    7.40    6.30
  20  -6   0   44.40    9.50
  20  -7   0    3.50    7.00
  20  -8   0    3.20    6.90
  20  -9   0    0.50    7.20
  20 -10   0   75.69   12.40
  20 -11   0   11.10    8.10
  21   9   0   10.40    6.30
  21   8   0    1.40    5.50
  21   7   0   13.10    6.20
  21   6   0    6.50    5.70
  21   5   0   -1.40    5.60
  21   4   0   -2.70    5.50
  21   3   0    2.00    5.80
  21   2   0   -2.50    5.30
  21   1   0   -1.30    5.40
  21   0   0   -4.30    5.30
  21  -1   0    3.30    5.70
  21  -2   0   -4.90    5.70
  21  -3   0   -2.40    5.90
  21  -4   0    1.50    6.60
  21  -5   0    3.20    6.80
  21  -6   0   -0.50    6.80
  21  -7   0   20.60    8.20
  21  -8   0    4.30    7.50
  21  -9   0    8.20    7.80
  22   6   0  102.89   13.10
  22   5   0    7.20    6.40
  22   4   0   32.90    8.40
  22   3   0   -4.80    5.70
  22   2   0   86.89   11.60
  22   1   0   -0.20    5.90
  22   0   0  163.78   16.10
  22  -1   0    8.80    7.20
  22  -2   0   41.70    9.50
  22  -3   0   -9.60    6.60
  22  -4   0   23.10    8.60
  22  -5   0   55.29   10.90
  22  -6   0   56.59   11.10
  23   1   0   -3.20    6.10
  23   0   0    2.60    7.30
  23  -1   0   12.90    7.60
   0   0   1   -0.60    1.20
   0   1  -1  697.63   33.20
   1   0  -1  715.73   33.10
   0  -1  -1  810.02   33.80
   0  -1  -1  744.83   32.90
  -1   0   1  687.33   33.00
   0  -1   1  691.73   33.10
   0   1   1  734.23   32.90
   1  -1  -1 6359.86  287.67
  -1  -1  -1 6423.66  287.07
  -1   1  -1 6537.05  286.17
   1  -1  -1 6333.37  287.17
   1   1  -1 6409.76  287.17
   1   1  -1 6229.68  286.27
   1   1   1 6420.06  285.77
   1  -1   1 6156.38  286.17
  -1  -1   1 6159.48  287.57
  -1   1   1 6465.15  287.07
   2   1  -1   55.49    3.30
   1  -2  -1   48.40    3.80
   1  -2  -1   49.00    3.10
  -2  -1  -1   43.90    2.90
  -2  -1  -1   56.99    4.60
   2   1   1   44.50    3.00
  -1   2   1   46.70    3.00
   2   0  -1   48.40    3.30
   2   0  -1   56.89    3.40
   0  -2  -1   46.80    3.00
   0  -2  -1   56.19    4.20
  -2   0   1   45.90    3.30
   0  -2   1   58.29    3.20
   0  -2   1   49.70    3.00
   0   2   1   41.70    3.00
   1   2  -1  269.77   13.40
   2  -1  -1  288.57   13.90
  -1  -2  -1  306.47   14.70
  -1  -2  -1  303.67   13.80
   2  -1  -1  286.77   13.90
  -1  -2  -1  285.47   13.60
   2  -1   1  279.17   13.60
  -1  -2   1  288.67   13.30
   1   2   1  273.77   13.70
  -2   1   1  308.37   13.90
  -2  -2  -1  273.17   13.50
  -2  -2  -1  253.57   14.40
   2  -2  -1  322.37   14.00
   2   2  -1  272.07   13.80
  -2  -2  -1  259.07   13.40
   2  -2  -1  295.17   13.60
  -2   2  -1  268.57   13.10
   2   2   1  280.57   13.50
  -2   2   1  302.57   13.60
   2  -2   1  273.77   13.10
  -2  -2   1  266.17   13.80
  -3  -2  -1 1872.41   86.39
   3   2  -1 2021.30   84.99
  -2   3  -1 1622.04   84.79
   3   2  -1 1885.81   85.89
   2  -3  -1 1936.91   85.49
  -3  -2  -1 1919.11   85.59
   2  -3  -1 1869.21   85.69
  -2   3  -1 1842.42   85.19
  -3  -2   1 1905.61   85.89
  -2   3   1 1929.91   85.49
   3   2   1 1897.01   85.59
   2  -3   1 1926.01   84.59
   2  -3   1 1881.41   85.09
   1  -3  -1  734.93   34.00
  -3  -1  -1  722.93   33.30
   1  -3  -1  755.92   33.40
  -1   3  -1  690.23   33.30
   3   1  -1  746.23   33.90
  -1   3   1  728.13   33.40
  -3  -1   1  719.23   33.80
   1  -3   1  703.03   33.20
   3   1   1  717.53   33.40
   3   1   1  718.73   33.40
  -3   0  -1 1994.80   89.19
   3   0  -1 1977.20   89.39
   0  -3  -1 2016.50   89.49
   0  -3  -1 1957.40   90.09
   3   0  -1 1958.30   89.89
   3   0   1 1897.61   89.29
   3   0   1 2064.79   89.49
  -3   0   1 1949.60   89.79
   0   3   1 2000.00   89.49
   1   3   1   24.90    3.00
   3  -1   1   18.50    2.20
  -3   2  -1    3.10    1.00
  -2  -3  -1    3.50    2.50
  -2  -3  -1    3.40    1.60
   2   3  -1    1.10    1.30
  -2  -3  -1    3.50    1.40
  -2  -3   1    1.00    0.80
   2   3   1    2.00    1.30
   3  -2   1    0.70    1.00
   3  -3  -1   62.69    4.50
   3  -3  -1   46.30    3.90
   3   3  -1   46.30    3.20
  -3   3   1   45.40    3.80
   3  -4  -1   35.80    3.40
   4   3  -1   26.00    3.60
  -4  -3  -1   30.50    3.40
   3  -4   1   26.30    2.90
   4   3   1   25.10    3.00
   4   3   1   28.10    3.20
  -4  -3   1   26.10    3.60
   3  -4   1   25.00    2.10
   4   2  -1  336.57   17.20
  -2   4  -1  359.66   16.50
  -2   4  -1  341.17   15.70
  -4  -2  -1  322.07   16.70
   2  -4  -1  336.37   16.60
   2  -4  -1  325.77   17.00
   4   2  -1  355.46   16.20
   4   2   1  328.87   16.60
   4   2   1  319.67   16.70
  -4  -2   1  338.97   17.20
  -2   4   1  327.57   16.60
   2  -4   1  335.57   15.50
   2  -4   1  374.86   16.50
   1  -4  -1    4.70    1.40
   4   1  -1    3.80    1.90
  -4  -1  -1    6.40    1.50
   1  -4  -1    3.50    2.20
  -1   4  -1    3.70    1.50
  -1   4   1    7.20    1.70
  -4  -1   1    3.60    1.50
   4   1   1    8.00    1.70
   4   1   1    4.20    1.40
   1  -4   1    1.50    1.70
   0  -4  -1  155.48    9.50
  -4   0  -1  164.88    8.50
   0  -4  -1  164.98    8.70
   0  -4   1  172.38    8.90
   4   0   1  160.28    8.60
   4   0   1  164.08    8.70
   0   4   1  160.18    8.90
  -1  -4  -1  401.26   19.90
  -4   1  -1  393.06   18.60
   4  -1  -1  386.26   19.30
   4  -1  -1  401.96   19.00
  -1  -4  -1  392.96   19.00
   4  -1   1  396.96   18.60
  -1  -4   1  393.76   19.30
   4  -1   1  398.36   18.80
   1   4   1  376.56   19.10
  -4   1   1  396.06   19.30
   2   4  -1  463.85   20.30
   2   4  -1  437.66   21.60
  -2  -4  -1  432.56   21.50
  -2  -4  -1  446.26   22.30
  -4   2  -1  435.86   20.90
  -2  -4  -1  419.46   21.60
   4  -2  -1  473.25   21.50
   4  -2  -1  461.15   21.70
  -4   2   1  452.15   21.50
  -2  -4   1  448.66   20.40
  -2  -4   1  434.56   21.70
   4  -2   1  443.86   20.70
   4  -2   1  431.06   21.00
   3   4  -1  488.65   24.70
  -3  -4  -1  539.15   24.70
  -4   3  -1  532.55   24.00
  -3  -4  -1  455.55   25.30
   4  -3  -1  506.35   24.50
   3   4   1  548.65   24.70
   4  -3   1  495.85   23.90
  -3  -4   1  488.05   24.80
  -4   3   1  532.25   24.40
   4  -3   1  484.25   23.40
   4   4  -1   13.90    2.50
   4  -4  -1   12.70    2.40
  -4  -4  -1    9.30    2.50
  -4   4  -1    7.30    1.60
   4  -4   1    6.40    1.60
   4   4   1    6.70    2.00
   4   4   1    5.10    1.90
   4  -4   1    8.10    1.30
   5   4  -1  108.89    7.30
   5   4  -1  100.59    5.70
   4  -5  -1   91.59    6.80
  -5  -4  -1  100.19    7.00
  -4   5  -1   96.09    6.30
   4  -5  -1  102.89    6.60
   5   4   1  101.79    6.60
   5   4   1   98.69    6.90
   4  -5   1  100.89    5.40
  -5  -4   1  105.09    7.40
  -4   5   1  103.49    6.70
   4  -5   1  102.59    6.30
   5   3  -1 1594.94   71.79
  -5  -3  -1 1613.94   72.99
  -3   5  -1 1575.14   72.39
   5   3  -1 1576.94   73.29
   3  -5  -1 1604.64   72.59
   3  -5  -1 1568.94   72.79
   5   3   1 1588.54   72.39
   3  -5   1 1580.14   71.39
  -3   5   1 1603.24   72.69
   3  -5   1 1565.04   72.29
   5   3   1 1562.74   72.99
  -5  -3   1 1577.74   73.39
  -2   5  -1   93.39    4.70
   5   2  -1   87.99    6.60
  -5  -2  -1   91.69    6.00
  -2   5  -1   86.29    5.80
  -5  -2   1  102.99    6.70
   5   2   1   94.49    6.00
  -2   5   1  104.89    6.10
   5   2   1   89.39    6.20
   2  -5   1   89.19    6.00
   2  -5   1   93.69    4.80
   5   1  -1 1159.98   51.19
   1  -5  -1 1156.08   52.19
   5   1  -1 1130.89   52.19
  -5  -1  -1 1115.99   51.59
  -1   5  -1 1091.29   51.59
   1  -5  -1 1132.49   51.59
  -5  -1   1 1076.79   52.09
  -1   5   1 1103.29   51.69
   5   1   1 1099.99   51.29
   5   1   1 1103.19   51.69
   1  -5   1 1124.09   51.49
   5   0  -1  720.73   34.10
  -5   0  -1  714.33   33.30
   5   0  -1  733.53   33.20
   0  -5   1  704.93   33.60
  -5   0   1  705.93   33.90
   5   0   1  712.03   33.10
   5   0   1  693.83   33.50
   5  -1  -1 1106.69   50.79
   5  -1  -1 1108.59   51.49
  -1  -5  -1 1106.39   51.69
  -1  -5  -1 1097.49   51.09
  -5   1  -1 1121.09   50.69
   1   5   1 1067.49   51.19
   5  -1   1 1116.49   50.89
  -5   1   1 1125.29   51.39
  -1  -5   1 1080.49   51.29
   5  -1   1 1114.09   50.49
   5  -2  -1    2.40    2.00
  -2  -5  -1    6.30    2.10
  -2  -5  -1    6.70    2.90
  -2  -5  -1    5.50    2.00
  -5   2  -1    5.00    1.40
   5  -2   1    3.60    1.40
   5  -2   1    4.40    1.50
   3   5  -1   48.50    3.10
   3   5  -1   42.30    4.60
   5  -3  -1   55.19    4.70
   5  -3  -1   48.80    4.50
  -3  -5   1   51.09    4.80
  -5   3   1   48.90    4.30
   5  -3   1   56.79    3.40
   4   5  -1  439.46   23.30
  -5   4  -1  471.05   22.50
   5  -4  -1  496.15   23.00
   5  -4  -1  469.15   23.10
  -4  -5  -1  465.15   23.40
   4   5  -1  470.45   21.60
   4   5   1  458.15   23.20
  -5   4   1  467.95   22.90
  -4  -5   1  480.85   23.80
   5  -4   1  452.45   22.50
   5  -4   1  463.55   21.70
   5  -5  -1    1.50    1.80
   5   5  -1    0.50    1.20
  -5   5  -1    2.10    1.40
  -5  -5  -1   -0.20    2.00
   5   5  -1    7.50    2.80
   5  -5  -1   -0.60    2.10
   5  -5   1    2.30    1.50
   5   5   1    1.20    1.70
  -5  -5   1    1.40    1.90
  -5   5   1    0.40    1.50
   5  -5   1    1.20    1.20
   5   5   1    1.30    1.80
  -5   6  -1  105.19    7.10
  -6  -5  -1  108.09    7.90
   6   5  -1   94.89    7.80
   5  -6  -1  120.69    8.00
   6   5  -1  115.29    6.20
   5  -6  -1  107.39    7.40
   5  -6   1  113.39    6.20
   5  -6   1  108.19    7.10
   6   5   1   98.19    7.50
   6   5   1  109.79    7.10
  -6  -5   1  106.69    8.20
  -5   6   1  104.19    7.30
  -6  -4  -1  337.67   18.10
   6   4  -1  349.17   18.50
   4  -6  -1  337.07   17.80
  -4   6  -1  337.57   17.40
   4  -6  -1  342.07   17.60
   6   4   1  340.47   17.40
  -6  -4   1  369.16   18.70
   4  -6   1  348.77   17.40
   4  -6   1  348.17   16.40
   6   4   1  344.27   18.20
  -4   6   1  336.37   17.60
   3  -6  -1    1.20    1.70
   6   3  -1   -1.20    1.40
   3  -6  -1   -3.20    2.20
   6   3  -1   -0.20    1.80
  -3   6  -1    1.50    1.50
  -6  -3  -1    0.90    1.60
   3  -6   1    1.20    1.50
   6   3   1    0.20    1.60
   3  -6   1    2.10    1.20
  -3   6   1    1.60    1.60
   6   3   1   -1.40    1.50
  -6  -3   1   -0.40    1.70
   6   2  -1   22.20    2.70
   2  -6  -1   20.80    3.50
   2  -6  -1   31.30    3.40
  -2   6  -1   18.10    2.90
  -6  -2  -1   31.50    3.50
   6   2   1   17.80    2.90
   6   2   1   20.20    2.90
   6   1  -1   17.90    3.20
   6   1  -1   24.50    2.80
  -1   6  -1   17.10    2.80
   1  -6  -1   27.00    3.40
  -6  -1  -1   17.20    2.60
   1  -6  -1   16.80    3.40
   6   1   1   16.70    2.90
  -6  -1   1   19.40    3.00
  -1   6   1   25.20    3.50
   6   1   1   20.50    2.80
   1  -6   1   19.60    3.20
   6  -1  -1  198.88   11.50
  -6   1  -1  198.08   10.80
   6  -1  -1  192.08   10.80
  -1  -6  -1  198.28   11.30
  -1  -6  -1  187.38   11.90
   1   6   1  191.88   11.40
  -1  -6   1  237.38   11.70
  -1  -6   1  191.28   11.40
  -6   1   1  199.48   11.40
   6  -1   1  208.78   11.20
   6  -1   1  230.28   10.70
  -2  -6  -1   -0.10    1.60
  -2  -6  -1    0.50    1.80
  -6   2  -1   -0.50    1.10
   6  -2  -1   -0.10    1.50
   2   6  -1    3.50    1.70
   6  -2  -1   -2.00    1.30
  -2  -6  -1   -1.10    2.50
  -6   2   1   -0.10    1.40
   6  -2   1    0.20    1.10
  -2  -6   1    1.20    2.40
   6  -2   1   -1.60    1.30
   3   6  -1  100.09    7.20
  -6   3  -1  105.59    6.40
   6  -3  -1  105.79    6.90
   3   6  -1  100.99    5.50
  -3  -6  -1  106.59    8.40
   6  -3  -1  105.09    7.20
  -3  -6  -1  104.69    7.30
  -3  -6  -1  103.69    7.80
   6  -3   1  114.19    6.00
  -3  -6   1  107.19    7.70
   6  -3   1  107.39    6.80
  -6   3   1  107.89    7.10
   4   6  -1   78.69    4.50
   6  -4  -1   70.39    6.00
  -6   4  -1   72.59    5.20
   4   6  -1   79.59    6.30
  -4  -6  -1   89.39    8.30
  -4  -6  -1   90.09    6.60
  -6   4   1   70.19    5.70
   6  -4   1   73.69    4.60
  -4  -6   1   71.29    6.30
   6  -4   1   65.89    5.50
   4   6   1   92.19    6.30
   5   6  -1  310.27   17.40
  -6   5  -1  320.47   16.40
   6  -5  -1  310.47   16.80
   6  -5  -1  315.57   17.10
  -5  -6  -1  330.17   17.70
   5   6  -1  335.67   15.50
   6  -5   1  318.37   16.50
   5   6   1  329.37   16.60
  -5  -6   1  336.97   18.00
  -6   5   1  320.47   16.90
   5   6   1  320.57   17.40
   6  -5   1  322.57   15.60
   6   6  -1   94.09    5.80
   6  -6  -1   96.99    7.30
   6   6  -1   88.89    7.60
  -6   6  -1   91.89    6.60
  -6  -6   1   97.99    8.30
   6  -6   1   89.79    6.70
   6  -6   1  100.99    6.00
   6   6   1  104.59    7.60
  -6   6   1   90.59    6.90
   6   6   1  106.69    7.10
   7   6  -1  161.98    9.10
  -7  -6  -1  167.58   11.20
   6  -7  -1  161.78   10.30
   6  -7  -1  174.18   10.90
   7   6  -1  169.38   11.20
  -6   7  -1  165.28   10.20
   7   6   1  164.78   10.00
  -6   7   1  160.98   10.30
   6  -7   1  162.98   10.10
   7   6   1  169.28   11.00
  -7  -6   1  174.68   11.60
   6  -7   1  165.48    9.20
   7   5  -1    3.40    1.80
   7   5  -1    8.30    3.10
  -5   7  -1    1.80    2.10
  -7  -5  -1    4.00    2.40
   5  -7  -1   -3.20    2.70
   5  -7  -1   -0.70    2.00
   7   5   1    0.90    2.10
  -5   7   1    0.40    2.10
   7   5   1    2.80    2.30
   5  -7   1    2.00    2.10
   5  -7   1    4.60    1.90
  -7  -5   1    3.10    2.50
   7   4  -1  314.57   17.60
  -4   7  -1  296.07   16.50
   4  -7  -1  368.16   17.40
   4  -7  -1  298.07   16.50
   7   4  -1  329.57   15.60
  -7  -4  -1  305.07   17.00
  -4   7   1  307.97   16.60
   7   4   1  297.57   16.10
   4  -7   1  319.97   15.30
  -7  -4   1  314.57   17.50
   4  -7   1  308.17   16.40
   7   4   1  328.87   17.30
   7   3  -1    9.40    2.70
  -7  -3  -1   11.60    2.70
   7   3  -1   16.70    2.40
   3  -7  -1   10.00    3.10
  -3   7  -1    7.60    2.30
   3  -7  -1    8.50    2.30
   3  -7   1    7.50    1.90
   3  -7   1    7.70    2.30
   7   3   1    7.10    2.20
  -7  -3   1    9.70    2.90
  -3   7   1    7.80    2.50
   7   3   1    7.80    2.40
   7   2  -1 1599.24   70.99
   2  -7  -1 1611.14   72.29
   2  -7  -1 1554.74   71.79
  -2   7  -1 1532.15   71.89
  -7  -2  -1 1510.25   71.99
   7   2  -1 1560.24   72.69
  -7  -2   1 1555.14   72.59
   7   2   1 1523.65   72.19
   2  -7   1 1588.74   71.69
  -2   7   1 1528.15   71.89
   7   2   1 1547.45   71.29
   1  -7  -1   -0.80    2.40
  -1   7  -1   -0.10    1.60
  -7  -1  -1   -0.80    1.60
   7   1  -1    6.30    2.40
   1  -7  -1    0.40    1.60
   7   1  -1    1.70    1.60
  -7  -1   1    5.50    1.90
   1  -7   1   -2.10    2.00
   7   1   1   -1.80    1.50
   7   1   1    0.20    1.50
  -1   7   1    4.50    2.00
   7   0  -1    9.80    2.20
   0  -7  -1   13.50    3.50
  -7   0  -1   11.00    2.30
   7   0  -1    7.90    2.80
  -7   0   1    8.80    2.60
   7   0   1    8.50    2.40
   7   0   1    8.70    1.90
  -7   1  -1  178.98    9.90
  -1  -7  -1  170.78   11.20
   7  -1  -1  179.98   10.70
  -1  -7  -1  166.58   10.30
   7  -1  -1  181.18    9.80
  -7   1   1  180.58   10.50
  -1  -7   1  163.08   10.50
   7  -1   1  176.98   10.20
  -1  -7   1  169.18   10.60
   1   7   1  168.28   10.50
   7  -1   1  179.58    9.40
  -3  -7  -1  161.98   10.70
  -3  -7  -1  158.38   10.20
   7  -3  -1  144.69    9.40
   3   7  -1  170.28    8.10
  -3  -7  -1  152.18   11.10
   7  -3  -1  156.88   10.00
  -7   3  -1  165.18    9.20
  -7   3   1  156.68    9.70
   7  -3   1  173.18    8.70
  -3  -7   1  154.98   10.70
   7  -3   1  161.98    9.60
   7  -4  -1  259.87   15.00
  -4  -7  -1  274.37   15.60
   4   7  -1  265.17   15.30
   4   7  -1  281.67   13.10
  -7   4  -1  259.87   14.10
   7  -4  -1  287.67   14.70
   7  -4   1  258.37   14.50
  -4  -7   1  260.17   15.50
   7  -4   1  268.07   13.40
  -7   4   1  282.27   14.70
   7  -5  -1 1139.29   53.79
   5   7  -1 1119.79   51.79
  -7   5  -1 1160.88   53.09
  -5  -7  -1 1144.79   54.29
   7  -5  -1 1142.19   53.29
   5   7  -1 1137.99   54.19
   5   7   1 1093.79   52.89
  -5  -7   1 1151.88   54.59
   7  -5   1 1140.49   52.09
   7  -5   1 1153.58   53.29
   5   7   1 1104.09   53.89
  -7   5   1 1152.78   53.49
   7  -6  -1    6.80    3.00
  -6  -7  -1    2.70    3.00
  -7   6  -1    6.10    2.30
   6   7  -1   10.00    1.90
   6   7  -1    7.20    2.70
   7  -6  -1    4.90    2.50
   6   7   1    6.90    2.90
  -6  -7   1   11.10    3.30
   7  -6   1    2.00    1.90
   6   7   1    1.30    2.50
   7   7  -1   99.49    6.10
  -7  -7  -1  102.89    8.50
  -7   7  -1   88.49    7.00
   7  -7  -1   93.19    7.80
   7   7  -1   92.59    8.10
   7  -7  -1   92.29    8.50
  -7   7   1   89.99    7.50
   7  -7   1   88.19    7.10
   7  -7   1   84.79    6.50
  -7  -7   1   95.99    8.60
   7   7   1   87.09    7.20
   7   7   1   98.19    7.90
   7  -8  -1   70.79    7.30
  -8  -7  -1   73.49    7.70
   8   7  -1   78.49    5.70
   7  -8  -1   85.09    8.40
   8   7  -1   79.19    7.80
  -7   8  -1   76.19    6.90
   8   7   1   73.59    7.40
  -7   8   1   80.59    7.20
  -8  -7   1   75.49    8.10
   8   7   1   68.79    6.80
   7  -8   1   83.99    6.50
   7  -8   1   75.99    6.80
   8   6  -1   13.30    3.90
   8   6  -1   17.30    2.80
  -6   8  -1   14.10    3.30
   6  -8  -1   23.20    4.00
  -8  -6  -1   15.60    3.90
   8   6   1   13.00    3.70
   6  -8   1   12.10    3.00
   8   6   1   13.10    3.40
  -6   8   1   14.80    3.50
  -8  -6   1   17.60    4.40
   6  -8   1   13.10    3.20
  -8  -5  -1   41.60    5.70
   8   5  -1   45.00    5.90
  -5   8  -1   41.00    5.10
   5  -8  -1   39.60    5.20
   5  -8  -1   55.19    6.70
   8   5  -1   45.90    4.50
  -8  -5   1   57.09    6.50
   8   5   1   57.29    5.90
  -5   8   1   35.70    4.70
   5  -8   1   39.20    4.90
   5  -8   1   33.60    4.70
   8   5   1   54.69    5.10
   4  -8  -1   92.89    8.60
   4  -8  -1  107.89    7.80
  -4   8  -1   96.09    7.70
   8   4  -1  111.69    8.70
   8   4  -1  121.99    7.00
  -8  -4  -1  117.99    8.30
   8   4   1  109.29    8.40
   4  -8   1  103.09    7.50
   4  -8   1  108.89    6.70
   8   4   1  112.59    7.40
  -8  -4   1  107.39    8.60
  -4   8   1  103.09    7.90
   8   3  -1   13.40    2.70
   3  -8  -1    9.50    2.60
   8   3  -1    9.10    2.80
  -8  -3  -1    9.40    2.90
   3  -8  -1    6.30    3.70
   8   3   1   14.70    2.90
  -3   8   1   12.80    3.00
   8   3   1    9.30    2.80
  -2   8  -1    4.30    2.40
  -8  -2  -1    2.00    1.80
   2  -8  -1   -3.20    2.80
   2  -8  -1    3.90    2.00
   8   2  -1    1.70    2.30
   2  -8   1    3.30    2.20
  -2   8   1    3.60    2.20
  -8  -2   1    0.30    2.20
   8   2   1    0.50    1.80
   8   2   1   -0.80    2.10
   1  -8  -1   12.90    3.70
   8   1  -1   16.30    2.80
   1  -8  -1   14.90    3.00
   8   1  -1   13.60    3.30
  -8  -1  -1   12.50    2.70
   8   1   1    9.20    2.80
   8   1   1   16.00    2.80
  -1   8   1   11.70    3.00
  -8  -1   1   12.60    3.10
   1  -8   1   14.80    3.50
  -8   0  -1  204.88   11.90
   8   0  -1  216.68   11.50
   8   0  -1  209.58   12.90
   0  -8  -1  205.58   13.10
   0  -8  -1  229.48   12.40
  -8   0   1  216.68   12.60
   8   0   1  204.58   11.30
   8   0   1  205.08   12.30
   0  -8   1  192.28   12.10
   0   8   1  221.88   12.80
   8  -1  -1   97.79    7.80
  -8   1  -1  112.49    7.20
  -1  -8  -1   93.49    8.70
  -1  -8  -1  101.59    7.80
   8  -1  -1   94.79    6.80
   8  -1   1  104.69    7.50
  -8   1   1  101.49    7.50
   8  -1   1  111.49    6.50
   1   8   1   93.29    7.80
  -1  -8   1  105.69    8.20
  -1  -8   1  104.79    8.10
   8  -2  -1    1.90    2.40
  -2  -8  -1    8.20    3.80
  -2  -8  -1    5.50    2.60
  -2  -8  -1    5.10    2.70
   8  -2  -1    1.10    1.90
  -8   2  -1    0.10    1.60
   8  -2   1    3.00    1.60
  -8   2   1    2.00    2.10
  -2  -8   1    2.70    2.80
   8  -2   1    2.00    2.10
  -2  -8   1   -0.60    2.30
  -8   3  -1   18.60    3.00
  -3  -8  -1   27.20    4.30
   3   8  -1   23.60    2.70
  -3  -8  -1   25.30    4.50
  -3  -8  -1   23.90    5.00
   8  -3  -1   17.50    3.40
   8  -3  -1   21.00    4.10
   8  -3   1   18.20    2.60
  -8   3   1   18.10    3.30
  -3  -8   1   26.80    4.70
   8  -3   1   24.30    3.80
   8  -4  -1   88.69    7.20
  -8   4  -1   81.09    6.30
   8  -4  -1   90.39    7.00
   8  -4   1   84.89    6.80
  -8   4   1   89.29    6.90
   8  -4   1   85.19    5.80
   8  -5  -1   46.60    5.70
  -8   5  -1   34.60    4.40
   8  -5  -1   38.50    5.30
  -5  -8  -1   36.20    5.60
   5   8  -1   41.80    3.90
   5   8  -1   38.90    5.30
  -5  -8  -1   35.50    5.30
  -5  -8   1   51.89    6.30
   8  -5   1   42.20    5.10
   8  -5   1   35.40    4.00
   5   8   1   42.30    5.00
  -8   5   1   34.30    4.80
   8  -6  -1    4.10    3.40
   6   8  -1   16.90    2.90
  -8   6  -1    8.10    2.70
   8  -6  -1    2.40    2.60
   6   8  -1    6.10    3.00
  -6  -8   1   10.80    4.20
   8  -6   1   10.50    2.60
   6   8   1   21.40    4.00
   8  -6   1    6.10    2.90
  -8   6   1    5.20    2.50
   8  -7  -1  263.57   15.40
  -7  -8  -1  251.17   16.30
   7   8  -1  258.17   13.30
   8  -7  -1  237.68   15.20
  -8   7  -1  261.07   14.60
   7   8  -1  249.88   15.70
   7   8   1  270.57   14.60
   8  -7   1  258.87   14.80
  -7  -8   1  254.47   16.40
   8  -7   1  272.27   13.80
   7   8   1  253.27   15.60
  -8   7   1  263.77   15.00
  -8   8  -1   -2.80    2.60
   8  -8  -1    7.20    3.60
   8   8  -1    6.70    2.70
   8   8  -1    6.10    3.50
  -8  -8  -1    2.10    3.40
  -8  -8   1    2.40    3.90
   8   8   1    3.70    3.10
   8  -8   1   -1.40    2.80
  -9  -8  -1   20.50    4.80
   9   8  -1   26.90    3.70
   9   8  -1   16.60    4.70
   8  -9  -1   19.80    5.70
   8  -9  -1   26.50    5.00
  -8   9  -1   19.50    4.10
   8  -9   1   22.20    4.40
   8  -9   1   22.50    4.30
   9   8   1   23.30    5.20
   9   8   1   23.70    4.80
  -8   9   1   26.90    4.90
  -9  -8   1   29.40    6.20
   9   7  -1 1355.96   65.49
  -7   9  -1 1327.57   63.99
   9   7  -1 1330.77   62.49
  -9  -7  -1 1375.56   65.39
   7  -9  -1 1378.06   64.29
   7  -9  -1 1352.76   64.39
  -9  -7   1 1381.96   65.79
   7  -9   1 1367.16   63.99
   7  -9   1 1411.56   62.99
   9   7   1 1341.67   63.39
  -7   9   1 1356.76   64.29
   9   7   1 1305.37   64.99
  -6   9  -1    7.40    2.80
   9   6  -1    1.50    2.40
  -9  -6  -1    8.60    3.70
   9   6  -1    5.70    3.30
   6  -9  -1    5.40    2.80
   9   6   1    2.60    3.00
  -6   9   1    5.60    3.00
  -9  -6   1    4.50    3.60
   6  -9   1    0.20    2.90
   9   6   1    2.60    3.10
   6  -9   1    8.30    2.90
   5  -9  -1   55.49    6.10
   9   5  -1   59.49    5.20
  -5   9  -1   49.40    5.70
   9   5  -1   47.80    6.70
   5  -9  -1   61.79    7.90
  -9  -5  -1   55.19    6.30
  -5   9   1   52.39    6.20
   9   5   1   59.29    6.60
   5  -9   1   52.09    5.30
   5  -9   1   51.19    5.60
  -9  -5   1   52.49    6.70
   9   5   1   52.69    5.70
  -9  -4  -1  158.38   10.60
   9   4  -1  151.38    8.90
   9   4  -1  147.19   11.10
  -4   9  -1  138.79   10.10
   9   4   1  141.69    9.50
   4  -9   1  135.89    9.60
  -9  -4   1  149.88   10.90
   4  -9   1  152.88    8.80
   9   4   1  159.98   10.80
   9   3  -1 1724.53   79.79
   9   3  -1 1675.23   77.39
  -9  -3  -1 1650.83   78.89
   3  -9  -1 1721.93   78.89
  -3   9  -1 1718.83   78.89
   3  -9  -1 1708.93   78.49
   3  -9   1 1648.94   76.99
   9   3   1 1679.23   77.79
  -3   9   1 1675.73   78.79
   9   3   1 1715.03   79.29
   3  -9   1 1677.73   78.29
  -9  -3   1 1698.63   79.59
  -9  -2  -1  379.96   19.60
   9   2  -1  377.66   18.40
  -2   9  -1  347.27   19.50
   2  -9  -1  364.06   19.90
   2  -9  -1  357.96   19.20
   9   2  -1  366.16   20.40
   9   2   1  371.06   18.50
  -9  -2   1  364.36   20.10
   2  -9   1  362.06   19.40
   9   2   1  363.66   19.80
  -2   9   1  352.76   19.60
   1  -9  -1  634.44   32.60
   9   1  -1  662.53   31.30
   9   1  -1  659.73   33.10
  -9  -1  -1  671.43   32.30
   1  -9  -1  641.34   32.10
   9   1   1  647.94   31.30
   9   1   1  640.04   32.60
  -1   9   1  648.44   32.60
   1  -9   1  701.63   32.30
  -9  -1   1  638.14   32.70
   9   0  -1   28.20    3.60
  -9   0  -1   24.10    3.70
   9   0  -1   32.20    5.30
   9   0   1   24.60    4.30
  -9   0   1   24.10    4.30
   0  -9   1   27.80    4.60
   9   0   1   25.50    3.30
  -1  -9  -1  107.89    7.90
   9  -1  -1   84.79    7.60
  -1  -9  -1   99.59    9.10
   9  -1  -1   77.99    6.40
  -9   1  -1   80.79    6.60
   9  -1   1   80.79    7.10
  -9   1   1   85.59    7.20
   9  -1   1   77.09    5.90
   1   9   1  100.49    8.10
   9  -2  -1  382.16   19.80
   9  -2  -1  374.16   20.90
  -9   2  -1  375.86   19.90
  -9   2   1  395.36   20.80
   9  -2   1  384.16   19.10
   9  -2   1  373.86   20.50
  -2  -9   1  438.56   21.40
  -2  -9   1  384.66   21.50
   9  -3  -1    8.30    3.40
   9  -3  -1   -0.50    2.80
  -9   3  -1    7.70    2.50
   9  -3   1    8.80    2.50
   9  -3   1    8.10    3.20
  -3  -9   1   11.70    5.30
  -3  -9   1    7.40    4.00
  -9   3   1    2.70    2.30
   4   9  -1  155.88    8.00
  -9   4  -1  151.18    9.40
   9  -4  -1  136.59    9.60
   9  -4  -1  148.39   10.60
   9  -4   1  143.39    9.90
  -9   4   1  144.79    9.80
  -4  -9   1  122.79   12.00
   9  -4   1  164.38    8.80
  -5  -9  -1   94.99    8.90
   9  -5  -1   78.79    7.80
  -5  -9  -1   89.79    9.20
  -9   5  -1   89.49    6.90
   5   9  -1  108.69    8.90
   9  -5  -1   90.89    8.00
   5   9   1   92.39    7.40
   9  -5   1   90.89    7.60
   9  -5   1   91.59    6.50
  -5  -9   1  105.69    9.20
  -9   5   1   86.49    7.50
  -9   6  -1   25.80    4.30
   9  -6  -1   26.70    4.70
  -6  -9  -1   38.30    6.40
   6   9  -1   29.30    5.30
   6   9  -1   36.70    4.30
  -6  -9  -1   27.30    6.10
   9  -6  -1   26.90    5.20
  -6  -9   1   33.40    5.90
   6   9   1   30.00    4.90
  -9   6   1   24.50    4.50
   6   9   1   30.30    5.20
   9  -6   1   23.50    4.40
   9  -6   1   40.00    4.90
  -9   7  -1    2.20    2.90
   9  -7  -1   -6.60    2.90
   9  -7  -1    0.50    3.90
   7   9  -1   -2.00    3.30
   9  -7   1    6.20    2.70
   7   9   1    2.40    3.20
   7   9   1   11.70    3.40
  -7  -9   1   -3.00    3.70
  -9   7   1   -4.10    2.50
   9  -7   1   -5.90    2.70
   9  -8  -1   56.89    7.40
  -8  -9  -1   72.59    9.30
   8   9  -1   56.19    8.00
   9  -8  -1   59.69    7.80
  -9   8  -1   63.79    6.40
   8   9  -1   50.79    5.50
  -9   8   1   55.39    6.90
   9  -8   1   58.29    7.10
  -8  -9   1   56.79    8.30
   8   9   1   63.49    7.50
   8   9   1   68.79    8.50
   9  -8   1   80.29    6.80
   9  -9  -1  424.66   24.00
  -9   9  -1  420.26   23.00
   9   9  -1  450.15   21.50
   9   9  -1  408.66   24.40
  -9  -9  -1  437.96   24.80
   9  -9  -1  426.16   23.80
   9   9   1  436.16   22.60
   9  -9   1  443.66   22.40
   9   9   1  420.16   24.30
   9  -9   1  437.96   23.40
  -9   9   1  449.16   23.50
  -9  -9   1  409.16   25.00
   9 -10  -1   20.60    6.60
  10   9  -1   29.50    4.30
  10   9  -1   24.50    5.60
   9 -10  -1   33.80    5.70
  10   9   1   32.40    5.60
 -10  -9   1   38.50    6.70
  10   9   1   36.10    7.40
  -9  10   1   24.80    4.90
   9 -10   1   16.70    5.10
   8 -10  -1   15.50    5.40
 -10  -8  -1   13.60    4.90
   8 -10  -1   23.50    4.90
  -8  10  -1   14.40    4.10
  10   8  -1   16.30    4.90
  10   8  -1   13.80    3.30
  10   8   1   14.30    4.40
  10   8   1   27.70    4.60
 -10  -8   1    9.60    4.50
   8 -10   1   11.80    3.90
   8 -10   1   15.00    4.00
  -8  10   1   17.90    4.70
 -10  -7  -1   45.40    6.70
   7 -10  -1   32.10    5.10
  10   7  -1   38.20    4.50
  10   7  -1   39.20    6.90
  -7  10  -1   37.40    5.50
   7 -10  -1   33.30    6.30
   7 -10   1   32.40    5.00
 -10  -7   1   28.60    5.70
   7 -10   1   38.80    4.90
  10   7   1   40.10    6.60
  -7  10   1   47.80    6.40
   6 -10  -1   29.00    4.90
  10   6  -1   26.00    5.30
  -6  10  -1   28.10    4.70
   6 -10  -1   36.40    6.10
 -10  -6  -1   21.50    4.80
   6 -10   1   24.50    4.40
 -10  -6   1   27.20    5.90
  10   6   1   25.10    4.40
   6 -10   1   25.00    4.40
  10   6   1   25.30    5.10
  -6  10   1   30.50    5.10
  10   5  -1  365.36   21.10
  10   5  -1  358.26   18.20
   5 -10  -1  342.17   20.50
 -10  -5  -1  347.57   20.30
  -5  10  -1  343.67   19.60
   5 -10  -1  341.67   19.40
  -5  10   1  350.06   19.70
  10   5   1  424.76   19.30
   5 -10   1  341.17   18.40
  10   5   1  343.87   20.40
   5 -10   1  356.26   19.30
 -10  -5   1  349.67   20.80
   4 -10  -1   16.10    5.20
  10   4  -1   15.30    4.60
  10   4  -1   19.60    3.40
   4 -10  -1    9.80    3.40
  -4  10  -1   14.60    3.80
 -10  -4  -1   16.00    4.10
   4 -10   1   12.10    3.50
  10   4   1   13.90    3.20
  -4  10   1   10.70    3.70
 -10  -4   1   18.70    4.80
  10   4   1   15.60    4.30
 -10  -3  -1   16.70    3.80
  10   3  -1   15.70    4.70
  -3  10  -1   19.60    4.30
   3 -10  -1   14.40    3.40
  10   3  -1   19.80    3.40
   3 -10  -1   13.60    4.70
  10   3   1   13.80    3.70
   3 -10   1   15.10    3.40
 -10  -3   1   18.90    4.60
  -3  10   1   17.60    4.50
   3 -10   1   19.00    3.60
  10   3   1   16.40    3.40
  10   2  -1   -5.70    2.20
   2 -10  -1   -2.40    3.40
  -2  10  -1    2.70    2.50
 -10  -2  -1   -0.70    2.20
  10   2  -1    1.10    3.10
   2 -10  -1   -1.70    2.10
   2 -10   1    1.20    2.90
  10   2   1   -1.70    2.10
  -2  10   1   -3.00    2.50
 -10  -2   1    1.30    2.80
  10   2   1   -2.50    2.40
  10   1  -1  251.17   15.50
  10   1  -1  237.88   13.50
   1 -10  -1  251.67   15.50
 -10  -1  -1  247.18   14.50
   1 -10  -1  254.17   14.50
  10   1   1  238.98   14.80
 -10  -1   1  244.18   15.10
  10   1   1  251.27   13.50
   1 -10   1  249.68   14.60
  -1  10   1  253.27   15.30
 -10   0  -1   -2.10    1.90
   0 -10  -1   11.70    4.60
  10   0  -1    9.40    3.20
  10   0  -1    0.20    2.40
 -10   0   1   -2.80    2.20
  10   0   1    0.00    2.60
   0 -10   1   -3.50    3.00
  10   0   1   -1.40    1.90
 -10   1  -1  138.29    9.10
  -1 -10  -1  145.89   10.90
  -1 -10  -1  100.29   10.80
  10  -1  -1  139.89   10.40
  -1 -10  -1  136.69   10.00
  10  -1  -1  135.69    8.90
  -1 -10   1  132.19   10.30
  10  -1   1  132.09    9.70
  -1 -10   1  123.99   10.40
  10  -1   1  135.89    8.20
   1  10   1  123.99   10.20
 -10   1   1  127.19    9.70
 -10   2  -1   17.60    3.40
  -2 -10  -1   25.10    6.00
  -2 -10  -1   26.20    5.20
  10  -2  -1   19.00    4.20
  -2 -10  -1   29.60    5.20
  10  -2  -1   14.40    3.60
 -10   2   1   18.60    3.90
  -2 -10   1   15.00    5.00
  10  -2   1   17.30    4.00
  10  -2   1   20.20    3.10
  -2 -10   1   13.60    4.60
 -10   3  -1   23.00    3.70
  -3 -10  -1   38.00    6.70
  -3 -10  -1   26.30    6.60
  -3 -10  -1   32.10    5.40
  10  -3  -1   27.10    4.40
  10  -3  -1   22.90    4.90
  10  -3   1   20.80    4.10
  -3 -10   1   38.10    5.70
 -10   3   1   25.40    4.50
  10  -3   1   22.80    3.40
  -4 -10  -1   74.89    8.90
  10  -4  -1   67.99    7.80
   4  10  -1   76.09    5.20
  -4 -10  -1   72.19    8.90
  -4 -10  -1   85.29   10.30
  10  -4  -1   70.19    6.90
 -10   4  -1   65.39    6.20
 -10   4   1   59.39    6.70
  10  -4   1   68.39    7.40
  10  -4   1   67.79    5.90
  -4 -10   1   80.29    9.10
  -4 -10   1   79.29   10.20
   5  10  -1  154.08    8.30
  -5 -10   1  124.09   12.00
  -6 -10  -1    7.40    4.80
  -6 -10  -1   14.00    9.20
  10  -6  -1   15.10    4.20
 -10   6  -1   11.70    3.30
  10  -6   1    8.50    3.90
   6  10   1   11.60    4.30
  -6 -10   1   23.30    5.30
  10  -6   1   15.80    3.50
  -7 -10  -1   29.90    6.70
 -10   7  -1   27.70    4.50
   7  10  -1   26.50    5.20
  10  -7  -1   28.20    5.80
  10  -7  -1   26.30    5.50
  10  -7   1   50.69    5.80
  10  -7   1   28.70    5.30
  -7 -10   1   30.40    6.50
   7  10   1   31.20    5.10
 -10   7   1   27.90    5.00
   9  10  -1   14.00    3.10
  10  -9  -1   16.40    4.60
  10  -9  -1   13.10    5.30
  -9 -10  -1   20.90    5.80
  -9 -10   1    7.60    4.60
 -10   9   1   16.40    4.40
   9  10   1   14.70    5.40
   9  10   1   10.20    4.50
  10  -9   1   22.40    4.30
  10  10  -1    3.30    2.60
  10 -10  -1    5.20    4.70
  10  10   1   14.00    4.10
  10 -10   1    2.40    3.40
 -10  10   1   10.90    3.80
  10 -11  -1   51.19    8.20
  11  10  -1   51.39    5.70
  11  10   1   57.49    7.50
 -11 -10   1   46.70    7.90
  10 -11   1   47.60    6.20
   9 -11  -1   94.39    9.70
  11   9  -1   98.99    7.30
   9 -11  -1   88.69   10.60
  -9  11   1   80.69    8.70
   9 -11   1   82.99    8.50
 -11  -9   1   86.69   10.10
  11   9   1   99.19    8.70
   8 -11  -1   68.89    7.60
  11   8  -1   63.49    6.40
  11   8  -1   73.89    8.80
   8 -11  -1   75.59    9.10
 -11  -8   1   71.09    9.00
  11   8   1   67.79    7.80
  -8  11   1   76.59    8.10
   8 -11   1   78.69    7.90
  -7  11  -1  265.07   20.70
  11   7  -1  267.47   17.70
 -11  -7  -1  258.27   17.30
   7 -11  -1  250.57   16.20
  11   7  -1  254.67   14.70
   7 -11  -1  265.87   17.80
  11   7   1  266.57   17.40
  11   7   1  280.07   15.90
   7 -11   1  311.57   16.00
 -11  -7   1  288.97   18.10
   7 -11   1  265.37   16.20
  -7  11   1  273.37   16.70
 -11  -6  -1    9.10    4.20
  11   6  -1   11.70    4.40
  11   6  -1   11.00    3.30
  -6  11  -1    9.30    3.70
   6 -11  -1    8.60    3.50
   6 -11  -1    6.10    4.80
  -6  11   1    9.90    4.00
   6 -11   1    6.70    3.30
  11   6   1    6.50    3.80
   6 -11   1   10.10    3.70
 -11  -6   1    8.70    4.20
  11   6   1    8.70    3.60
 -11  -5  -1   -4.80    2.70
  11   5  -1    0.90    2.70
   5 -11  -1   -4.70    4.40
   5 -11  -1   -2.00    2.60
  11   5  -1   -0.30    3.60
  -5  11  -1   -1.00    3.10
  -5  11   1    1.50    3.30
   5 -11   1    2.40    3.20
  11   5   1    5.60    3.70
  11   5   1    2.80    2.70
 -11  -5   1    0.90    3.80
   5 -11   1   -3.80    2.60
  -4  11  -1   39.70    5.90
 -11  -4  -1   27.40    5.20
   4 -11  -1   38.20    6.40
   4 -11  -1   29.90    4.80
  11   4  -1   31.10    6.40
  11   4  -1   31.20    4.30
 -11  -4   1   27.50    6.10
   4 -11   1   43.00    5.60
  -4  11   1   30.60    5.30
  11   4   1   22.00    5.10
  11   4   1   26.70    4.30
   4 -11   1   25.60    4.60
   3 -11  -1 1398.46   65.59
  11   3  -1 1416.86   63.89
  -3  11  -1 1364.16   65.49
   3 -11  -1 1381.66   65.09
  11   3  -1 1377.96   66.59
 -11  -3  -1 1350.26   65.49
  11   3   1 1422.46   63.99
  11   3   1 1363.56   65.99
 -11  -3   1 1370.26   66.19
  -3  11   1 1321.57   65.49
   3 -11   1 1352.86   64.79
 -11  -2  -1   16.60    4.00
  -2  11  -1   14.40    4.00
  11   2  -1   17.10    3.60
   2 -11  -1    9.20    4.10
  11   2  -1   11.10    4.20
  11   2   1   20.10    3.40
  11   2   1   13.30    4.20
   2 -11   1    7.30    4.20
 -11  -2   1   11.10    4.20
  -2  11   1   13.20    4.60
  11   1  -1  691.93   35.40
 -11  -1  -1  673.03   34.10
   1 -11  -1  655.73   33.90
   1 -11  -1  658.53   34.60
  11   1  -1  653.93   33.00
  11   1   1  665.33   34.70
  -1  11   1  706.93   35.10
  11   1   1  667.73   32.80
 -11  -1   1  689.73   35.00
   1 -11   1  745.63   34.50
   0 -11  -1  118.49   10.90
  11   0  -1   75.79    7.60
  11   0  -1   87.59    9.10
 -11   0  -1   85.49    7.70
   0 -11   1   76.19    9.10
   0 -11   1   78.49    9.80
 -11   0   1   87.89    8.50
  11   0   1   89.29    7.00
  11   0   1   88.79    8.50
   0  11   1  108.29    9.40
  11  -1  -1  312.07   19.40
 -11   1  -1  314.37   17.90
  11  -1  -1  290.87   17.40
  -1 -11   1  362.86   19.80
  11  -1   1  310.47   16.80
  -1 -11   1  363.26   19.30
 -11   1   1  335.67   18.90
  11  -1   1  315.87   18.90
  11  -2  -1  263.17   17.00
  11  -2  -1  261.97   15.40
  -2 -11  -1  296.77   17.90
  -2 -11  -1  279.27   17.20
 -11   2  -1  275.57   15.60
  -2 -11  -1  274.37   18.10
  -2 -11   1  272.57   18.20
  11  -2   1  280.97   16.70
  -2 -11   1  252.17   17.20
  11  -2   1  275.27   14.70
 -11   2   1  279.77   16.50
  11  -3  -1 1013.40   49.00
 -11   3  -1 1015.70   48.90
  11  -3  -1 1004.00   50.39
  -3 -11   1 1037.90   50.49
  -3 -11   1 1045.90   51.39
  11  -3   1 1017.40   49.99
  11  -3   1 1009.80   48.00
 -11   3   1 1062.79   49.90
  -4 -11  -1   61.29    9.00
 -11   4  -1   48.90    5.80
  11  -4  -1   46.90    6.30
  -4 -11  -1   69.49   10.70
  -4 -11  -1   51.39    7.70
  11  -4   1   47.20    5.90
  -4 -11   1   51.79    7.40
  11  -4   1   52.89    7.30
  11  -5  -1   11.00    4.10
   5  11  -1   10.30    2.60
  11  -5  -1    8.50    4.00
 -11   5  -1    4.00    2.70
 -11   5   1    3.60    3.20
   5  11   1    5.90    3.80
  11  -5   1   10.70    4.10
  11  -5   1    5.40    3.00
  -5 -11   1    6.20    4.70
  -5 -11   1    2.10    4.90
   6  11  -1  108.59    6.60
  11  -6  -1   96.29    9.50
 -11   6  -1   82.69    7.60
  11  -6  -1   99.29    9.30
  -6 -11  -1   89.69   10.50
   6  11   1   79.99    8.60
  -6 -11   1  105.39   10.50
  11  -6   1   79.19    8.60
 -11   6   1   92.99    8.50
  11  -6   1   84.29    7.50
  -7 -11  -1  555.04   31.60
  11  -7  -1  550.94   30.50
   7  11  -1  570.94   27.40
  11  -7  -1  585.54   30.00
  -7 -11   1  543.25   31.70
  11  -7   1  590.54   30.40
   7  11   1  569.64   28.90
 -11   7   1  564.74   29.80
  11  -7   1  610.84   28.60
  -8 -11  -1  171.38   15.90
  11  -8  -1  139.59   11.50
   8  11  -1  142.39    8.90
  11  -8  -1  137.89   11.60
  -8 -11   1  137.49   13.10
  11  -8   1  136.59    9.90
 -11   8   1  133.59   10.60
   9  11  -1   92.79    7.20
  11  -9  -1  111.19   10.70
  11  -9   1   99.59    8.70
  -9 -11   1   87.49   10.50
   9  11   1   99.69    9.00
 -11   9   1   95.19    9.00
  10  11  -1   28.30    3.90
  11 -10  -1   19.00    6.00
  10  11   1   32.00    5.50
 -10 -11   1   24.80    6.70
  11 -10   1   22.80    4.90
  11 -11  -1    8.90    5.60
  11  11  -1   12.80    3.20
 -11 -11   1   13.50    5.60
  11  11   1    9.60    4.50
  11 -11   1   12.60    4.50
  12  11  -1    0.30    2.90
  11 -12  -1   -6.50    4.90
  11 -12   1   -0.30    3.90
  12  11   1   -0.70    3.50
  10 -12  -1   21.20    6.30
  12  10  -1   23.00    3.90
  10 -12   1    7.60    4.70
  12  10   1   21.40    4.70
   9 -12  -1    0.30    4.90
  12   9  -1    2.00    3.00
   9 -12   1   16.90    4.80
 -12  -9   1    3.40    4.00
  12   9   1    0.70    3.70
  12   8  -1    2.90    2.90
  12   8  -1    1.80    6.30
   8 -12  -1   -1.20    4.60
  -8  12   1    2.10    3.10
 -12  -8   1    4.70    3.80
   8 -12   1    2.70    3.80
  12   8   1    1.10    3.10
  12   7  -1   13.40    4.80
   7 -12  -1   15.40    5.70
   7 -12  -1   11.40    3.70
  12   7  -1   15.20    3.70
   7 -12   1   14.50    4.30
 -12  -7   1   20.30    5.70
  -7  12   1   17.90    4.70
  12   7   1   16.90    4.20
  12   6  -1   56.69    6.50
   6 -12  -1   78.79    7.70
   6 -12  -1   66.99    8.70
  12   6  -1   54.39    8.00
   6 -12   1   64.19    7.40
  12   6   1   59.99    7.30
  -6  12   1   84.99    8.20
 -12  -6   1   64.69    8.80
  -5  12  -1  129.09   10.90
  12   5  -1  124.69   11.30
   5 -12  -1   96.49   11.60
  12   5  -1  110.39    8.80
 -12  -5  -1  131.89   12.00
   5 -12  -1  114.09    9.70
  12   5   1  115.99   10.80
   5 -12   1   94.09    9.00
 -12  -5   1  126.69   11.30
   5 -12   1  115.59    9.50
  -5  12   1  126.09   10.30
  12   5   1  104.09    9.10
   4 -12  -1   18.40    6.00
  12   4  -1   26.60    4.20
  12   4  -1   18.70    5.10
   4 -12  -1   12.80    4.00
  -4  12  -1   13.80    4.70
 -12  -4  -1   23.10    4.80
   4 -12   1   18.40    4.00
  -4  12   1   17.90    5.00
 -12  -4   1   21.70    4.80
   4 -12   1   11.80    4.00
  12   4   1   22.50    4.10
  12   4   1   16.80    4.80
 -12  -3  -1   26.60    5.20
  12   3  -1   22.30    4.10
  12   3  -1   26.70    6.00
   3 -12  -1   22.10    5.70
   3 -12  -1   24.80    4.90
  -3  12  -1   22.50    4.90
 -12  -3   1   24.60    5.10
  12   3   1   23.90    5.00
   3 -12   1   28.50    5.10
  -3  12   1   17.50    5.10
 -12  -2  -1   10.10    3.70
   2 -12  -1    6.90    3.60
  12   2  -1    8.90    3.40
  12   2  -1   13.00    4.30
   2 -12  -1    6.50    5.00
  -2  12   1    7.50    4.90
   2 -12   1   14.60    4.70
  12   2   1    8.60    3.20
  12   2   1   12.40    4.20
 -12  -2   1    9.70    4.00
  12   1  -1  130.69    9.60
  12   1  -1  118.79   11.20
 -12  -1  -1  129.49   10.00
   1 -12  -1  144.39   10.70
  -1  12   1  134.99   11.70
   1 -12   1  152.98   11.30
  12   1   1  130.89   10.80
 -12  -1   1  127.19   10.70
  12   1   1  125.39    9.00
  12   0  -1   34.20    5.20
  12   0  -1   36.70    6.30
 -12   0  -1   33.90    5.20
   0 -12  -1   39.20    7.80
 -12   0   1   26.70    5.40
  12   0   1   28.00    4.20
   0 -12   1   43.10    6.80
   0  12   1   37.10    6.30
  12   0   1   37.40    6.00
   0 -12   1   38.80    6.80
  -1 -12  -1   73.19    9.80
  12  -1  -1   85.29   10.20
 -12   1  -1   60.09    6.90
  12  -1  -1   72.49    7.40
  -1 -12  -1   72.59    8.70
  -1 -12  -1   65.89    9.40
  -1 -12   1   79.79    8.90
  -1 -12   1   79.49    9.40
 -12   1   1   58.69    7.70
  12  -1   1   60.99    7.90
  12  -1   1   68.89    6.30
  -2 -12  -1   -1.00    3.80
  12  -2  -1   -4.80    2.90
  12  -2  -1   -3.40    3.30
  -2 -12  -1    2.30    4.20
 -12   2  -1   -0.30    2.40
  12  -2   1   -2.30    2.30
  -2 -12   1   -0.80    4.00
  12  -2   1   -1.20    2.80
  -2 -12   1    3.30    4.80
 -12   2   1   -2.70    2.70
  12  -3  -1   45.40    6.20
  -3 -12  -1   58.09    9.40
 -12   3  -1   55.49    6.10
  -3 -12  -1   58.99    8.40
  -3 -12  -1   69.09    9.00
  12  -3  -1   38.00    6.40
  -3 -12   1   85.19   10.00
 -12   3   1   49.30    7.00
  12  -3   1   50.09    5.80
  12  -3   1   53.09    7.30
 -12   4  -1    2.60    2.90
  -4 -12  -1    0.20    6.90
  12  -4  -1   -1.40    3.40
  -4 -12  -1   11.90    6.50
  12  -4  -1    1.70    3.40
   4  12  -1    9.00    2.30
  12  -4   1    6.70    3.20
  -4 -12   1    6.90    5.90
  12  -4   1    5.70    4.10
  -4 -12   1    5.10    5.40
 -12   4   1    4.30    3.10
  12  -5  -1  161.98   11.80
  -5 -12  -1  176.08   15.10
   5  12  -1  151.08    8.90
  12  -5  -1  142.69   12.40
 -12   5   1  148.59   11.40
  -5 -12   1  159.08   14.40
  12  -5   1  143.89   12.10
   5  12   1  163.48   11.10
  12  -5   1  166.18   10.40
  -5 -12   1  168.18   13.30
  12  -6  -1   -2.10    3.60
   6  12  -1   13.10    2.80
  12  -6  -1    4.20    4.30
  -6 -12  -1    3.90    4.30
   6  12   1    6.10    4.20
  12  -6   1    4.40    3.50
  -6 -12   1    9.10    4.80
 -12   6   1    7.50    4.00
  -6 -12   1   22.80    5.80
  12  -7  -1   33.90    6.20
   7  12  -1   47.30    5.20
  12  -7  -1   33.80    6.40
  12  -7   1   42.90    5.50
  -7 -12   1   45.60    8.60
   7  12   1   43.60    6.10
 -12   7   1   39.60    6.00
   8  12  -1   15.30    3.10
  12  -8  -1   18.10    5.30
  -8 -12   1   21.70    6.70
 -12   8   1   18.50    5.80
   8  12   1   22.00    5.20
  12  -8   1   14.00    4.20
  12  -9  -1    5.80    5.50
   9  12  -1   20.50    3.40
  12  -9   1   15.90    4.40
   9  12   1   21.60    5.60
  -9 -12   1   18.50    6.00
  12 -10  -1   -1.80    4.90
  10  12  -1    5.30    2.80
  10  12   1   12.20    4.30
 -10 -12   1    3.50    4.70
  12 -10   1    3.90    4.10
  12 -11  -1   20.50    6.70
  11  12  -1   15.30    3.50
  12 -11   1   20.00    5.30
  11  12   1   25.00    5.60
  12  12  -1    1.20    3.00
  12 -12  -1   -0.60    5.40
  12 -12   1   -5.20    3.80
  12  12   1   -1.60    3.90
  12 -13  -1    7.70    6.60
  13  12  -1   -0.50    3.20
  13  12   1    5.10    4.30
  12 -13   1   -8.80    4.30
  13  11  -1   91.49    8.30
  11 -13  -1   94.19   11.70
  13  11   1   93.49    9.60
  11 -13   1  116.89   11.00
  13  10  -1   13.00    3.70
  10 -13  -1    9.20    5.90
  10 -13   1    5.00    4.80
  13  10   1    8.40    4.20
   9 -13  -1  128.19   13.60
  13   9  -1  144.69   10.00
  13   9   1  147.79   10.90
   9 -13   1  136.99   11.60
  13   8  -1   36.50    5.00
   8 -13  -1   33.40    7.10
  13   8   1   38.60    5.70
   8 -13   1   24.10    5.80
   7 -13  -1   -4.80    4.90
  13   7  -1   -3.30    3.10
  13   7   1   -2.90    3.40
  -7  13   1    1.40    3.10
 -13  -7   1    6.10    4.10
   7 -13   1   17.90    4.70
  13   6  -1   16.10    5.10
   6 -13  -1    9.20    5.60
  13   6  -1    9.70    3.50
   6 -13  -1   18.40    4.50
   6 -13   1    7.30    4.00
 -13  -6   1   22.20    5.80
  -6  13   1    7.10    3.80
   5 -13  -1   79.49    8.10
  13   5  -1   80.89    9.50
   5 -13  -1   76.19   10.10
  13   5  -1   70.79    7.30
   5 -13   1   73.59    7.80
 -13  -5   1   79.29    9.20
  13   5   1   84.89    7.60
  -5  13   1   83.69    9.00
  13   4  -1  149.19   12.40
   4 -13  -1  147.99   10.90
   4 -13  -1  125.69   12.00
  13   4  -1  139.99    9.80
  13   4   1  141.19    9.80
   4 -13   1  126.39    9.80
 -13  -4   1  139.49   11.60
  -4  13   1  146.99   11.80
  13   3  -1    6.60    4.20
   3 -13  -1    9.30    3.80
   3 -13  -1   12.00    5.30
  13   3  -1    6.50    3.60
 -13  -3   1    9.10    4.50
  -3  13   1    5.60    4.10
  13   3   1    9.30    3.30
   3 -13   1    8.80    5.20
  13   2  -1   52.79    7.10
   2 -13  -1   65.69    8.60
  13   2  -1   43.80    7.10
   2 -13  -1   57.79    7.30
  -2  13   1   65.89    9.00
 -13  -2   1   60.89    8.30
  13   2   1   53.29    6.10
  13   2   1   50.59    7.90
   2 -13   1   64.59    8.50
  13   1  -1    6.00    3.60
   1 -13  -1    0.50    3.50
  13   1  -1    1.50    3.90
   1 -13  -1    9.10    6.10
  -1  13   1    4.00    5.20
 -13  -1   1    3.80    3.60
  13   1   1    4.90    4.00
  13   1   1    4.70    3.10
   1 -13   1    9.30    4.30
  13  -1  -1  685.53   35.00
  -1 -13  -1  731.33   39.30
  13  -1  -1  699.23   37.30
  -1 -13  -1  682.73   36.70
  -1 -13  -1  740.33   37.40
 -13   1   1  736.23   36.70
  -1 -13   1  678.83   36.70
  13  -1   1  716.43   36.90
  13  -1   1  688.73   34.20
  -1 -13   1  712.23   36.50
  13  -2  -1   23.80    4.80
  13  -2  -1   25.50    6.10
  13  -2   1   20.90    5.70
  -2 -13   1   28.40    7.80
  -2 -13   1   13.20    5.80
  13  -2   1   25.50    4.20
 -13   2   1   22.10    5.30
  -3 -13  -1  795.42   37.30
  13  -3  -1  662.13   36.30
  -3 -13  -1  698.23   36.80
  13  -3  -1  660.53   34.50
  -3 -13   1  660.93   35.80
  13  -3   1  666.13   33.50
 -13   3   1  695.53   35.40
  -3 -13   1  695.23   37.50
  -4 -13  -1   37.80    8.50
  13  -5  -1   19.70    5.00
  13  -5  -1   17.90    5.30
  -5 -13  -1   25.50    7.00
 -13   5   1   19.10    4.30
  -5 -13   1   26.60    7.20
   5  13   1   13.50    4.70
  13  -5   1   28.00    4.50
  13  -6  -1   -5.60    4.00
  13  -6   1   -3.20    3.00
 -13   6   1   -1.10    3.10
  -6 -13   1    1.60    4.40
   6  13   1   -6.00    3.50
  13  -7  -1  528.45   29.20
   7  13  -1  555.34   27.00
  -7 -13   1  524.05   31.10
   7  13   1  556.34   28.10
  13  -7   1  568.04   28.10
   8  13  -1   12.90    3.00
  13  -8  -1    1.30    4.60
  -8 -13   1    3.00    5.40
   8  13   1   13.00    4.70
  13  -9  -1  238.38   17.20
   9  13  -1  231.18   13.40
   9  13   1  244.28   15.30
  -9 -13   1  257.07   18.80
  13  -9   1  249.88   15.40
  10  13  -1   -0.70    2.60
  13 -10  -1   -3.10    5.10
  13 -10   1    5.00    4.40
  10  13   1   -0.40    4.00
  13 -11  -1   14.70    7.20
  11  13  -1   21.20    3.90
  11  13   1   17.50    5.50
  13 -11   1   14.80    5.30
  13 -12  -1   37.90    8.60
  12  13  -1   35.60    4.90
  13 -12   1   41.40    7.10
  12  13   1   39.10    6.40
  13  13  -1   73.79    8.00
  13 -13  -1   72.49   11.30
  13  13   1   71.89    9.40
  13 -13   1   71.59    9.30
  13 -14  -1   47.10    9.80
  14  13  -1   41.10    6.50
  14  13   1   52.59    7.30
  14  12  -1    6.00    3.90
  12 -14  -1   -4.20    6.10
  14  12   1    5.50    4.30
  14  11  -1   12.30    4.10
  11 -14  -1   -1.20    6.70
  14  11   1   11.70    4.70
  10 -14  -1    7.40    6.20
  14  10  -1    6.70    3.70
  14  10   1    6.40    4.20
   9 -14  -1    6.50    6.00
  14   9  -1    8.60    3.70
  14   9   1   11.60    4.30
  14   8  -1   17.30    4.40
   8 -14  -1   12.20    6.20
  14   8   1   20.00    4.60
   7 -14  -1   22.40    6.70
  14   7   1   26.20    4.90
   6 -14  -1   -3.20    4.90
  14   6  -1    4.10    3.30
  14   6   1   -0.60    3.00
   5 -14  -1    9.10    5.40
  14   5  -1    9.70    3.90
  14   5   1    9.30    3.80
  -5  14   1   15.20    5.40
   4 -14  -1    5.00    4.80
  14   4  -1    0.70    3.40
  -4  14   1    5.70    4.40
 -14  -4   1    3.60    3.60
  14   4   1    0.80    3.10
   3 -14  -1    5.70    5.30
  14   3  -1   12.60    4.30
  14   3  -1   11.80    5.50
  14   3   1   14.70    3.80
 -14  -3   1    7.30    4.00
  -3  14   1    6.80    4.80
   2 -14  -1    3.60    5.00
  14   2  -1    2.20    3.50
  14   2  -1    2.00    3.90
 -14  -2   1    4.10    3.80
  -2  14   1    2.40    4.80
  14   2   1   -1.20    2.80
  14   1  -1   -2.70    3.10
   1 -14  -1    5.30    5.30
  14   1  -1   -6.80    2.90
  14   1   1   -1.20    2.80
  -1  14   1   -5.40    3.50
 -14  -1   1   -2.70    2.90
   0 -14  -1    9.80    6.10
  14   0  -1    7.60    4.10
  14   0  -1    9.60    4.20
   0 -14  -1    9.70    5.60
   0 -14   1    3.80    4.20
  14   0   1    8.30    3.30
 -14   0   1    9.60    4.50
  14  -1  -1   52.39    8.00
  -1 -14  -1   60.99    9.10
  14  -1  -1   59.59    7.60
  -1 -14  -1   62.59    9.80
  -1 -14   1   56.39    8.10
 -14   1   1   55.59    7.90
  14  -1   1   65.29    6.70
  14  -2  -1    2.40    5.40
  -2 -14  -1    0.50    4.80
  14  -2  -1    7.50    3.80
  -2 -14  -1   -0.20    5.70
  14  -2   1    1.20    2.90
 -14   2   1   -1.40    3.10
  -2 -14   1    0.70    5.50
  -3 -14  -1   18.90    6.80
  14  -3  -1   16.10    4.60
  -3 -14  -1   22.80    7.20
  -3 -14   1   29.90    8.10
 -14   3   1   14.40    4.80
  14  -3   1   18.70    4.10
  14  -4  -1   64.99    8.30
  -4 -14   1   58.19    9.60
  14  -4   1   64.29    7.20
  14  -5  -1  182.28   13.40
  14  -5   1  175.38   12.00
   5  14   1  190.78   12.50
  -5 -14   1  188.58   16.60
  14  -6  -1   34.70    7.10
  -6 -14   1   43.80    8.00
   6  14   1   47.70    7.00
  14  -6   1   52.69    6.50
  -7 -14   1   25.40    7.40
   7  14   1   22.40    5.20
  14  -7   1   28.20    5.20
  14  -8  -1   -6.90    4.60
   8  14   1    0.50    4.50
  -8 -14   1   10.10    5.50
  14  -8   1   -2.40    3.60
  14  -9  -1   34.20    7.20
  14  -9   1   44.00    6.60
   9  14   1   34.30    6.80
  14 -11  -1   30.50    8.00
  11  14   1   34.80    6.50
  14 -11   1   21.70    6.00
  14 -12  -1   12.30    7.30
  12  14   1    7.30    4.70
  14 -12   1    9.40    5.30
  14 -13  -1   -7.00    5.90
  14 -13   1    2.80    5.20
  13  14   1   -2.10    4.40
  14 -14  -1   -4.80    6.50
  14  14   1    0.20    4.20
  14 -15  -1   12.60    7.90
  15  14   1   14.30    5.30
  15  13  -1   -4.40    4.80
  13 -15  -1   -8.70    6.50
  15  13   1   -9.20    3.60
  12 -15  -1    0.90    6.90
  15  12  -1   -1.20    3.60
  15  12   1   -1.90    4.10
  15  11  -1  158.08   11.80
  11 -15  -1  174.38   16.90
  15  11   1  166.98   12.50
  10 -15  -1   22.40    7.90
  15  10  -1   21.60    4.90
  15  10   1   25.20    5.50
   9 -15  -1  160.58   15.70
  15   9  -1  174.28   12.00
  15   9   1  169.38   12.40
  15   8  -1   -4.60    3.20
   8 -15  -1   -7.40    5.40
  15   8   1    1.60    3.70
  15   7  -1    3.30    3.60
   7 -15  -1    3.90    5.40
  15   7   1    4.70    3.80
  15   6  -1    8.10    4.00
   6 -15  -1   16.90    6.50
  15   6   1   14.40    4.40
   5 -15  -1  132.69   13.60
  15   5  -1  160.38   11.40
  15   5   1  163.78   11.20
  15   4  -1   32.20    5.50
   4 -15  -1   23.40    6.90
  15   4   1   35.00    5.40
  15   3  -1  351.66   19.70
   3 -15  -1  334.07   21.30
  15   3   1  354.36   19.20
  -3  15   1  353.36   22.80
   2 -15  -1    0.10    5.60
  15   2  -1    0.10    3.60
  -2  15   1   -1.70    3.80
  15   2   1    1.60    3.20
  15   1  -1    4.30    3.70
   1 -15  -1    1.80    5.60
   1 -15   1    0.20    4.20
  15   1   1    3.30    3.10
  -1  15   1   11.30    4.80
  15   0  -1   96.69    9.00
   0 -15  -1  102.29   11.70
   0 -15   1  105.39   11.30
  15   0   1   91.59    8.10
  -1 -15  -1   47.40    8.80
  15  -1  -1   57.59    7.10
  -1 -15   1   54.29    9.40
  15  -1   1   47.80    6.40
  15  -2  -1   75.69    8.30
  -2 -15  -1   69.39   10.20
  -2 -15   1   58.69   10.00
  15  -2   1   61.49    7.00
  -3 -15  -1   -5.40    6.60
  15  -3  -1   -0.20    4.20
  15  -3   1    3.50    3.40
  -3 -15   1   -1.00    7.30
  15  -4  -1    6.30    4.30
   4  15   1    8.70    4.20
  15  -4   1    0.10    3.60
  -4 -15   1   13.50    6.60
  15  -5  -1   -3.00    4.30
  15  -5   1   -2.70    3.50
   5  15   1    3.20    4.30
  -5 -15   1    6.00    5.90
  15  -6  -1   22.30    6.20
   6  15   1   30.90    5.80
  -6 -15   1   33.00    7.70
  15  -6   1   20.00    5.10
  15  -7  -1   54.99    8.50
  -7 -15   1   43.80    9.30
  15  -7   1   48.30    6.80
   7  15   1   57.19    7.30
  15  -8  -1   57.09    9.10
   8  15   1   73.09    9.40
  15  -8   1   96.39    9.60
  15  -9  -1   16.10    6.50
  15  -9   1   14.60    5.40
   9  15   1   16.80    5.40
  15 -10  -1   11.10    6.50
  15 -10   1   10.70    5.50
  10  15   1   13.00    5.40
  15 -11  -1  117.69   14.20
  15 -11   1  116.69   12.50
  11  15   1  115.69   11.10
  15 -12  -1    0.20    6.60
  15 -12   1    1.80    5.30
  12  15   1    3.60    4.50
  15 -13  -1  240.98   20.50
  13  15   1  256.97   16.40
  15 -13   1  245.78   18.20
  15 -14  -1   -1.00    7.40
  14  15   1   -1.50    4.10
  15 -15  -1    5.10    8.00
  15  15   1   -2.30    4.20
  16  15   1   -3.50    4.30
  14 -16  -1    5.40    8.80
  16  14   1   -1.00    4.40
  13 -16  -1    4.10    7.30
  16  13   1    3.00    4.50
  12 -16  -1    7.20    7.70
  16  12  -1   10.30    4.80
  16  12   1   13.70    5.20
  11 -16  -1   -3.40    6.80
  16  11  -1   -0.50    3.90
  16  11   1    5.10    4.40
  16  10  -1   -0.80    4.10
  10 -16  -1    0.70    6.70
  16  10   1   -2.70    3.80
  16   9  -1   49.80    6.80
   9 -16  -1   47.80    9.70
  16   9   1   45.90    6.60
   8 -16  -1   30.70    8.30
  16   8  -1   29.70    5.60
  16   8   1   33.10    5.90
  16   7  -1   74.59    8.30
   7 -16  -1   59.89    9.70
  16   7   1   69.09    8.50
   6 -16  -1    6.20    6.00
  16   6  -1   16.00    4.80
  16   6   1   32.70    5.30
   5 -16  -1    1.50    5.70
  16   5  -1    5.40    3.90
  16   5   1    4.90    3.70
   4 -16  -1    7.80    5.80
  16   4  -1   10.30    4.30
  16   4   1    4.50    3.70
  16   3  -1    6.90    4.20
   3 -16  -1   12.50    6.40
  16   3   1   11.20    3.90
   2 -16  -1   -2.20    5.60
  16   2  -1   -4.60    3.70
  16   2   1    4.90    3.50
   1 -16  -1   43.20    8.50
  16   1  -1   27.10    5.60
   1 -16   1   21.40    6.00
  16   1   1   24.80    4.90
   0 -16  -1   13.10    6.70
  16   0  -1    1.40    4.10
  16   0   1   -2.20    3.40
   0 -16   1    2.50    3.90
  16  -1  -1    0.10    3.90
  -1 -16  -1   -2.30    6.10
  16  -1   1    0.60    3.50
  -1 -16   1    0.50    5.10
  16  -2  -1   -3.70    3.70
  -2 -16  -1    4.40    6.70
  -2 -16   1    0.00    6.00
  16  -2   1   -1.10    3.30
  16  -3  -1    9.10    4.80
  16  -3   1    5.60    4.00
  -3 -16   1   12.50    7.60
  16  -4  -1    9.30    5.00
  16  -4   1    6.30    4.40
   4  16   1    9.50    5.20
  -4 -16   1    4.90    6.50
  16  -5  -1    1.90    4.60
  -5 -16   1    1.10    5.50
  16  -5   1   -4.10    4.00
   5  16   1   -1.60    4.70
  16  -6  -1   -0.40    5.10
   6  16   1    3.60    4.10
  16  -6   1   -6.30    3.80
  16  -7  -1   -2.80    5.00
   7  16   1   -1.30    4.70
  16  -7   1   -3.90    3.90
  16  -8  -1   22.60    7.10
   8  16   1   26.40    6.80
  16  -8   1   22.30    6.10
  16  -9  -1   12.90    6.50
  16  -9   1    8.70    5.50
   9  16   1    7.50    6.00
  16 -10  -1   18.30    7.40
  16 -10   1   18.20    6.60
  10  16   1   22.90    8.20
  16 -11  -1   -0.30    6.70
  16 -11   1    1.30    5.80
  11  16   1    4.20    7.40
  16 -12  -1   -3.90    6.60
  16 -12   1    1.30    5.70
  16 -13  -1    2.60    7.50
  16 -13   1   -0.60    5.90
  16 -14  -1    5.90    8.10
  16 -15  -1   18.00    8.80
  17  15   1   65.99    8.80
  17  14   1    0.10    4.90
  17  13   1    2.50    4.80
  17  12  -1    1.00    4.50
  17  12   1    5.50    4.90
  17  11  -1    7.40    4.60
  17  11   1    5.00    4.80
  17  10  -1   22.00    5.60
  17  10   1   24.20    5.70
  17   9  -1    0.40    4.20
  17   9   1   -2.00    3.90
  17   8  -1    2.20    4.30
  17   8   1    8.70    4.50
  17   7  -1    7.50    4.50
  17   7   1   -1.10    3.90
  17   6  -1   30.90    5.90
  17   6   1   25.20    5.50
  17   5  -1   43.40    6.80
  17   5   1   43.80    6.40
  17   4  -1   23.20    5.80
  17   4   1   35.80    5.60
  17   3  -1   22.60    5.60
  17   3   1   10.30    4.60
  17   2  -1   -1.60    4.20
   2 -17   1   -0.20    4.60
  17   2   1    0.20    3.80
  17   1  -1   60.89    7.90
   1 -17   1   48.70    8.70
  17   0  -1    0.70    4.50
   0 -17   1   -4.10    4.10
  17   0   1   -1.00    3.70
  17  -1  -1  341.97   20.80
  17  -1   1  351.86   19.90
  -1 -17   1  338.47   24.10
  17  -2  -1   12.00    5.40
  17  -2   1   10.40    4.50
  -2 -17   1    4.50    6.50
  17  -3  -1   61.99    8.90
  17  -3   1   64.09    8.00
  17  -4  -1   -0.20    5.00
  17  -4   1   -3.10    4.00
  17  -5  -1   51.99    8.80
  17  -5   1   57.59    7.90
  17  -6  -1    6.10    5.90
  17  -6   1    6.50    4.90
  17  -7  -1   73.19   10.30
  17  -7   1   73.39    9.00
  17  -8  -1   23.20    8.00
  17  -8   1   35.00    7.20
  17  -9  -1   31.70    8.30
  17  -9   1   21.60    7.00
  17 -10  -1    0.90    7.40
  17 -10   1   -5.60    5.40
  17 -11  -1    9.60    8.00
  17 -11   1    9.60    6.40
  17 -12  -1   41.30   10.20
  17 -12   1   51.79    9.40
  17 -13  -1    0.50    7.60
  17 -13   1    0.90    7.10
  17 -14  -1   15.00    9.20
  17 -15  -1    4.20    8.10
  18  14   1   -0.10    4.80
  18  13   1   18.30    5.90
  18  12  -1   -0.50    4.70
  18  12   1    1.40    4.80
  18  11  -1    2.70    4.80
  18  11   1    4.10    4.80
  18  10  -1   10.10    5.10
  18  10   1    7.60    4.70
  18   9  -1   -0.30    4.40
  18   9   1    0.60    4.30
  18   8  -1    3.40    4.70
  18   8   1   -2.40    4.10
  18   7  -1    6.00    4.70
  18   7   1   -1.90    4.00
  18   6  -1   20.10    5.70
  18   6   1   10.20    5.00
  18   5  -1    6.30    4.80
  18   5   1    0.60    4.20
  18   4  -1    2.40    4.90
  18   4   1   -0.60    4.10
  18   3  -1    0.20    4.90
  18   3   1    2.40    4.30
  18   2  -1    4.00    5.10
   2 -18   1   24.90    6.30
  18   2   1    6.10    4.50
  18   1  -1   12.80    5.80
  18   1   1   18.80    5.40
   1 -18   1   12.50    5.70
  18   0  -1   -1.20    4.60
   0 -18   1   -7.20    5.70
  18   0   1    0.60    4.20
  18  -1  -1   -4.40    4.40
  18  -1   1    0.20    4.10
  18  -2  -1    4.30    5.50
  18  -2   1    9.20    5.00
  18  -3  -1   75.59   10.10
  18  -3   1   70.79    8.70
  18  -4  -1   -0.10    5.60
  18  -4   1   12.80    5.40
  18  -5  -1   27.00    7.60
  18  -5   1   42.40    7.30
  18  -6  -1    5.40    6.10
  18  -6   1    7.00    5.30
  18  -7  -1   -0.10    6.20
  18  -7   1    1.90    5.30
  18  -8  -1    4.30    6.90
  18  -8   1   -1.80    5.20
  18  -9  -1    0.50    6.70
  18  -9   1   -1.70    5.50
  18 -10  -1   -2.30    6.90
  18 -10   1   -1.50    5.70
  18 -11  -1   -6.90    6.90
  18 -11   1   -1.60    6.20
  18 -12  -1   -5.90    7.40
  18 -12   1    5.30    6.70
  18 -13  -1    3.40    8.30
  18 -14  -1   -4.60    8.30
  19  12  -1   10.70    5.90
  19  12   1    1.80    5.10
  19  11  -1  106.09   12.00
  19  11   1  111.79   11.60
  19  10  -1   13.40    5.90
  19  10   1   15.40    5.70
  19   9  -1   80.99   10.60
  19   9   1   74.69    9.10
  19   8  -1    0.40    5.00
  19   8   1    3.70    4.70
  19   7  -1   10.20    5.50
  19   7   1    6.10    4.80
  19   6  -1   28.50    6.70
  19   6   1   29.40    6.50
  19   5  -1   65.89    9.20
  19   5   1   68.19    8.70
  19   4  -1   40.00    7.60
  19   4   1   37.60    7.00
  19   3  -1   29.10    7.20
  19   3   1   30.70    6.50
  19   2  -1   10.70    5.60
  19   2   1   10.00    5.10
  19   1  -1    3.20    5.30
  19   1   1   -3.70    4.50
  19   0  -1   39.90    7.90
  19   0   1   50.49    7.60
  19  -1  -1   14.40    6.50
  19  -1   1    1.60    4.80
  19  -2  -1    0.90    5.80
  19  -2   1   -0.80    4.40
  19  -3  -1   27.40    7.60
  19  -3   1   23.90    6.30
  19  -4  -1    1.30    5.70
  19  -4   1    6.00    5.10
  19  -5  -1   39.10    8.80
  19  -5   1   38.90    7.70
  19  -6  -1   -0.60    6.30
  19  -6   1   31.60    6.80
  19  -7  -1  115.19   14.70
  19  -7   1   96.89   13.00
  19  -8  -1  -13.70    6.20
  19  -8   1    6.50    6.30
  19  -9  -1    2.80    7.50
  19  -9   1    0.50    6.20
  19 -10  -1    5.10    7.80
  19 -10   1   15.60    7.40
  19 -11  -1   80.69   13.40
  19 -11   1  116.39   14.60
  19 -12  -1    3.90    8.10
  19 -12   1   16.20    8.10
  20  11  -1    2.60    5.40
  20  11   1   -5.60    4.60
  20  10  -1    2.00    5.70
  20  10   1    2.70    5.50
  20   9  -1   28.50    7.80
  20   9   1   47.50    7.70
  20   8  -1    1.60    5.70
  20   8   1    1.80    5.00
  20   7  -1   21.00    6.80
  20   7   1   23.90    6.40
  20   6  -1    0.50    5.20
  20   6   1    3.90    5.20
  20   5  -1   -1.20    5.30
  20   5   1    0.60    5.10
  20   4  -1   -5.80    5.00
  20   4   1   -3.60    4.70
  20   3  -1   -0.60    5.40
  20   3   1    5.10    5.30
  20   2  -1    1.70    5.80
  20   2   1   -2.10    4.90
  20   1  -1    4.40    5.70
  20   1   1    7.60    5.50
  20   0  -1    1.40    5.90
  20   0   1   13.80    5.40
  20  -1  -1    8.20    6.20
  20  -1   1   -1.80    5.10
  20  -2  -1    4.30    6.20
  20  -2   1   -1.00    4.90
  20  -3  -1   -1.10    5.90
  20  -3   1    0.00    5.30
  20  -4  -1   -0.10    6.10
  20  -4   1    6.30    5.60
  20  -5  -1    2.60    6.90
  20  -5   1   -0.60    5.50
  20  -6  -1    4.70    7.10
  20  -6   1    7.10    6.10
  20  -7  -1    4.90    7.40
  20  -7   1    5.10    6.40
  20  -8  -1   -4.90    7.60
  20  -8   1    0.50    6.40
  20  -9  -1    7.00    8.30
  20  -9   1   19.10    7.80
  20 -10  -1    3.40    7.90
  20 -10   1   12.20    7.90
  20 -11  -1    7.60    8.50
  20 -11   1   10.00    7.50
  21   9  -1   30.40    8.00
  21   9   1   34.50    7.40
  21   8  -1    6.50    6.40
  21   8   1   -0.60    5.30
  21   7  -1   26.50    7.50
  21   7   1   31.90    7.20
  21   6  -1    3.60    6.00
  21   6   1    1.90    5.40
  21   5  -1  124.09   14.10
  21   5   1  144.19   13.50
  21   4  -1   -0.30    5.70
  21   4   1    2.90    5.50
  21   3  -1   -2.70    5.70
  21   3   1    4.90    5.70
  21   2  -1   13.90    6.60
  21   2   1    3.10    5.70
  21   1  -1   99.59   13.30
  21   1   1   94.39   12.20
  21   0  -1   30.50    8.30
  21   0   1   32.90    7.80
  21  -1  -1   78.69   11.50
  21  -1   1   79.49   10.90
  21  -2  -1    0.90    6.60
  21  -2   1    7.50    6.30
  21  -3  -1    5.40    7.20
  21  -3   1   -4.20    5.70
  21  -4  -1   11.10    8.00
  21  -4   1    3.30    6.20
  21  -5  -1   10.60    8.00
  21  -5   1   11.00    6.80
  21  -6  -1   19.30    8.90
  21  -6   1   16.60    7.10
  21  -7  -1   -2.70    7.40
  21  -7   1    5.30    6.70
  21  -8  -1   -6.90    7.70
  21  -8   1    5.70    7.00
  21  -9  -1    6.60    8.10
  21  -9   1   13.40    7.80
  22   6  -1    5.00    6.40
  22   6   1    4.30    5.90
  22   5  -1    8.50    6.90
  22   5   1    6.60    6.10
  22   4  -1   -2.50    6.30
  22   4   1    1.00    6.00
  22   3  -1   21.40    8.20
  22   3   1   33.30    8.10
  22   2  -1   -1.60    6.20
  22   2   1    0.50    5.70
  22   1  -1    5.50    7.00
  22   1   1    5.10    6.10
  22   0  -1   -1.30    6.40
  22   0   1   -0.90    5.90
  22  -1  -1    8.40    7.70
  22  -1   1   11.10    7.00
  22  -2  -1   -1.10    7.60
  22  -2   1    5.90    6.90
  22  -3  -1   24.50    8.90
  22  -3   1   16.80    7.60
  22  -4  -1   -0.70    7.70
  22  -4   1    6.60    6.90
  22  -5  -1    9.30    8.40
  22  -5   1    7.50    6.40
  22  -6  -1    7.90    8.20
  22  -6   1    1.20    7.00
   0   0  -2 2351.16  107.09
   0  -1  -2  373.46   18.40
   1   0  -2  341.37   17.80
  -1   0   2  343.47   16.70
  -1   1  -2   89.39    8.80
   1  -1  -2  123.19    6.60
   1   1  -2  129.59    7.80
  -1   1   2  131.29    6.50
   2   1  -2 1021.70   46.30
   2   1  -2  964.30   46.50
   1  -2  -2 1032.40   47.40
   1  -2  -2 1004.00   46.00
  -2  -1  -2 1067.39   47.80
  -1   2  -2  928.41   46.60
  -1   2   2 1022.10   45.90
   2   0  -2  274.17   15.30
   0   2  -2  251.07   15.20
   2   0  -2  301.57   14.80
   0  -2  -2  325.17   14.30
  -2   0   2  300.07   14.70
   0   2   2  337.87   14.50
  -2   1  -2  887.21   41.50
   2  -1  -2  845.22   40.50
   1   2  -2  822.72   40.60
   2  -1  -2  952.00   41.40
  -1  -2  -2  862.21   42.00
  -2   1   2  931.51   40.50
  -1  -2   2  843.52   40.40
   2  -2  -2  111.39    6.40
  -2   2  -2  105.89    7.80
   2   2  -2   96.69    6.30
   2   2  -2  105.39    6.50
  -2  -2  -2   96.19    8.70
  -2  -2   2   94.79    6.40
  -2   2   2  109.39    6.10
  -3  -2  -2  181.18   12.60
   2  -3  -2  210.28   11.80
   3   2  -2  206.58   10.50
   3   2  -2  193.38   10.70
   2  -3  -2  197.48   10.50
   3   2   2  184.68   10.10
  -3  -2   2  197.78   10.70
  -2   3   2  195.78   10.30
   1  -3  -2  811.12   36.90
  -3  -1  -2  778.22   37.20
   1  -3  -2  804.82   35.30
   3   1  -2  719.03   35.60
   3   1  -2  741.13   35.80
  -1   3  -2  745.63   35.60
  -1   3   2  776.22   35.30
  -3  -1   2  725.63   35.70
   0  -3  -2   44.90    3.70
   3   0  -2   50.59    4.50
   0   3  -2   45.70    4.80
   3   0  -2   67.29    5.20
   0  -3  -2   59.09    6.80
   0  -3   2   42.80    4.30
   0   3   2   47.10    3.90
  -3   0   2   51.19    4.30
   3  -1  -2   28.70    3.80
  -1  -3  -2   26.60    2.80
  -1  -3  -2   26.20    5.10
   3  -1  -2   30.10    3.30
   1   3   2   34.30    3.40
  -3   1   2   30.40    3.20
  -2  -3  -2   81.89    8.20
   2   3  -2   86.39    6.10
  -2  -3  -2   91.89    5.90
   2   3  -2   90.59    6.00
   3  -2  -2   94.29    6.10
  -2  -3  -2   98.19    5.50
  -3   2   2  100.79    5.90
   2   3   2  100.59    5.90
  -2  -3   2   95.09    6.30
  -3  -3  -2 1366.66   64.29
  -3  -3  -2 1328.37   63.89
   3  -3  -2 1418.66   65.39
   3   3  -2 1345.97   64.09
  -3  -3  -2 1409.26   66.19
   3   3  -2 1467.05   64.89
   3  -3  -2 1529.35   64.79
  -3   3   2 1546.25   64.59
  -3  -3   2 1386.46   64.89
   3   3   2 1305.97   64.19
   3  -3   2 1372.66   63.89
   4   3  -2   77.89    5.50
   3  -4  -2   59.79    5.20
  -4  -3  -2   83.89    5.10
   4   3  -2   67.29    5.60
   4   3   2   73.89    5.20
  -4  -3   2   66.89    5.80
  -3   4   2   62.49    5.00
   3  -4   2   63.99    4.50
  -4  -2  -2  241.38   14.70
   2  -4  -2  228.38   13.60
   4   2  -2  240.68   12.30
   4   2  -2  247.38   12.90
   2  -4  -2  233.78   12.20
   2  -4   2  232.78   11.70
  -4  -2   2  227.08   12.70
  -2   4   2  232.98   12.20
   4   2   2  225.68   11.90
   2  -4   2  224.38   11.30
   1  -4  -2  472.85   24.00
   4   1  -2  465.25   22.80
   1  -4  -2  475.65   22.40
  -1   4  -2  419.26   22.30
   4   1  -2  465.15   23.10
  -4  -1   2  453.65   23.00
  -1   4   2  543.95   22.70
   1  -4   2  454.85   22.30
   4   0  -2  442.16   20.20
   0  -4  -2  402.26   19.20
   0   4  -2  356.16   18.90
   0  -4  -2  358.56   20.80
   4   0  -2  449.86   20.00
  -4   0   2  439.46   20.00
   0  -4   2  349.27   19.30
   0   4   2  381.36   19.30
   4   0   2  395.66   19.50
   0  -4   2  409.46   19.20
   4  -1  -2  322.07   15.40
   4  -1  -2  273.77   14.90
   1   4  -2  278.07   14.10
   4  -1   2  295.77   14.60
  -4   1   2  297.17   15.00
  -1  -4   2  276.37   14.80
   2   4  -2   59.59    4.70
   4  -2  -2   44.70    4.90
   2   4  -2   55.59    4.40
  -2  -4  -2   60.59    4.30
  -2  -4  -2   62.99    4.70
  -2  -4  -2   55.79    7.10
   4  -2   2   55.99    4.30
  -4   2   2   54.59    4.60
  -2  -4   2   66.49    5.00
   2   4   2   51.39    4.70
   3   4  -2   80.49    5.10
  -3  -4  -2   57.89    5.10
   3   4  -2   87.19    5.80
  -3  -4  -2   74.59    5.00
   4  -3  -2   65.59    6.10
  -3  -4  -2   68.29    8.10
   4  -3  -2   66.39    5.50
  -4   3   2   66.69    5.30
   4  -3   2   69.89    4.60
  -3  -4   2   67.79    5.70
   4   4  -2   54.89    5.00
   4   4  -2   46.20    4.40
  -4  -4  -2   47.50    4.40
  -4  -4  -2   49.70    4.60
   4  -4  -2   51.89    4.90
  -4  -4  -2   61.69    7.30
   4  -4   2   44.40    3.70
   4   4   2   51.39    4.50
  -4   4   2   44.50    4.40
   4  -4   2   44.50    3.60
   5   4  -2  155.78    9.90
   4  -5  -2  159.38   10.60
  -5  -4  -2  156.98    9.30
  -5  -4  -2  146.59   12.00
  -4   5  -2  146.69    8.50
   5   4  -2  153.98    9.00
   4  -5  -2  157.08    9.40
   5   4   2  151.98    9.30
  -4   5   2  161.48    9.20
  -5  -4   2  160.48   10.00
   4  -5   2  149.39    7.80
   4  -5   2  149.29    8.40
  -3   5  -2  190.28   10.20
   3  -5  -2  196.78   12.20
   3  -5  -2  193.48   10.80
  -5  -3  -2  188.88   10.60
   5   3  -2  196.68   11.50
   3  -5   2  189.78   10.20
  -5  -3   2  193.98   11.40
   3  -5   2  194.38    9.50
  -3   5   2  196.18   10.80
   5   3   2  203.88   10.80
  -5  -2  -2   75.59    5.20
   2  -5  -2  104.69    8.00
   5   2  -2   71.49    6.20
   5   2  -2   85.09    6.10
   2  -5  -2   95.69    5.90
   5   2   2   74.09    5.90
  -5  -2   2   73.79    6.10
   5   2   2   81.59    5.50
  -2   5   2   84.89    5.80
   2  -5   2   81.49    5.60
   5   1  -2  293.57   14.70
   1  -5  -2  251.07   15.30
   1  -5  -2  261.37   13.60
   5   1  -2  275.47   14.10
   5   1   2  256.07   13.80
  -5  -1   2  273.97   14.40
  -1   5   2  256.07   13.80
   1  -5   2  247.98   13.50
   5   1   2  272.17   13.50
   5   0  -2   14.80    3.20
   5   0  -2   17.60    3.20
   0  -5  -2   15.50    4.20
   0  -5  -2   14.90    2.40
  -5   0   2   14.60    2.80
   5   0   2   14.00    2.10
   5   0   2   14.90    2.70
   0   5   2   15.30    2.70
  -1  -5  -2  230.98   11.80
   5  -1  -2  215.28   12.40
   5  -1  -2  216.68   12.50
  -1  -5  -2  241.58   14.40
   1   5   2  235.98   12.30
  -5   1   2  224.28   12.40
   5  -1   2  224.18   11.90
   5  -1   2  215.28   11.50
  -1  -5   2  238.38   12.60
   5  -2  -2  385.66   18.70
  -2  -5  -2  348.77   20.00
  -2  -5  -2  337.57   18.20
   2   5  -2  410.76   18.40
   2   5  -2  394.16   17.20
   5  -2  -2  349.77   18.70
  -2  -5  -2  355.86   17.80
   5  -2   2  357.46   17.70
  -2  -5   2  328.97   18.30
   2   5   2  338.97   18.20
   5  -2   2  353.96   17.50
  -5   2   2  364.16   18.30
   3   5  -2  129.79    6.70
   3   5  -2  102.69    7.50
   5  -3  -2  111.99    7.70
   5  -3  -2   95.39    8.10
  -3  -5   2  108.89    8.00
  -5   3   2  135.89    7.60
   5  -3   2  108.69    6.60
   5  -3   2  109.19    6.70
  -4  -5  -2   17.80    3.10
   4   5  -2   15.90    2.50
   5  -4  -2   13.00    3.60
  -4  -5  -2   13.70    2.70
   4   5  -2   13.50    2.90
  -5   4  -2   14.20    2.20
   5  -4  -2   10.90    2.80
  -4  -5  -2   18.20    4.90
   4   5   2    9.50    2.20
   5  -4   2   14.00    2.10
  -5   4   2   13.20    2.90
  -4  -5   2   17.70    3.30
   5  -4   2   15.60    2.20
  -5  -5  -2   98.59    7.50
   5  -5  -2   86.49    8.40
   5  -5  -2   98.19    7.40
   5   5  -2  104.39    7.70
  -5   5  -2   95.09    6.40
  -5  -5  -2  111.09    7.30
  -5  -5  -2  136.59   11.40
  -5  -5   2  116.49    8.30
   5   5   2  101.29    7.20
   5  -5   2   85.59    5.80
  -5   5   2  112.99    7.40
   5  -5   2   97.69    6.40
   6   5  -2   17.50    3.30
   6   5  -2   24.40    4.20
  -6  -5  -2   24.10    3.70
   5  -6  -2   26.30    4.20
  -5   6  -2   24.60    3.20
   5  -6  -2   15.60    4.70
  -5   6   2   21.40    3.70
   5  -6   2   21.80    3.10
   5  -6   2   19.60    2.40
   6   5   2   16.90    3.70
  -6  -5   2   26.30    4.40
   6   5   2   16.90    3.40
   6   4  -2   57.39    5.90
   6   4  -2   67.79    5.10
   4  -6  -2   51.49    5.20
  -4   6  -2   52.59    4.80
  -6  -4  -2   48.70    5.10
   4  -6  -2   82.29    7.70
   4  -6   2   54.69    3.40
   4  -6   2   51.79    4.60
   6   4   2   56.19    5.60
  -4   6   2   47.80    5.20
   6   4   2   53.19    5.30
  -6  -4   2   51.49    5.90
   3  -6  -2  447.96   24.30
  -3   6  -2  456.95   22.60
  -6  -3  -2  449.26   22.80
   3  -6  -2  463.05   23.00
   6   3  -2  475.05   22.80
   6   3  -2  476.75   24.00
   6   3   2  466.05   23.20
  -6  -3   2  459.95   23.80
   6   3   2  461.55   23.20
  -3   6   2  479.85   23.20
   3  -6   2  480.05   22.60
   3  -6   2  451.65   21.20
   2  -6  -2  121.09    7.50
   2  -6  -2  100.49    9.60
   6   2  -2  124.89    7.70
   6   2  -2  122.49    8.40
  -6  -2  -2  122.09    7.20
  -2   6   2  113.99    7.60
   2  -6   2  125.19    7.40
   6   2   2  114.09    7.50
   6   2   2  116.79    7.90
  -6  -2   2  119.39    8.30
   6   1  -2  244.48   13.40
   6   1  -2  255.97   14.30
   1  -6  -2  240.48   13.10
   1  -6  -2  237.48   14.90
  -6  -1  -2  255.87   12.80
  -1   6   2  251.37   13.40
  -6  -1   2  247.38   13.90
   6   1   2  280.27   13.60
   6   1   2  238.48   13.10
   1  -6   2  240.38   13.10
   6   0  -2  194.98   12.10
  -6   0  -2  214.78   11.00
   6   0  -2  215.28   12.60
   0  -6  -2  255.77   11.90
   0  -6   2  187.18   11.70
   6   0   2  215.18   11.70
  -6   0   2  218.58   12.40
   6   0   2  206.98   11.40
   0  -6   2  188.28   11.80
   0   6   2  246.08   12.30
  -1  -6  -2    2.70    3.90
   6  -1  -2    5.00    2.40
   6  -1  -2    5.10    2.30
  -1  -6  -2    8.20    2.10
   6  -1   2    4.80    2.10
  -1  -6   2    5.60    2.80
  -6   1   2    7.20    2.40
   6  -1   2    7.40    2.00
   1   6   2    8.40    2.40
   6  -2  -2   33.00    4.80
  -6   2  -2   35.20    3.20
   6  -2  -2   32.90    4.40
  -2  -6  -2   49.50    4.40
  -6   2   2   32.10    4.20
   6  -2   2   42.60    3.90
   6  -2   2   33.10    3.80
   3   6  -2  122.99    6.80
   6  -3  -2  131.69    8.90
  -3  -6  -2  109.99   10.40
  -3  -6  -2  112.39    8.40
  -6   3  -2  119.59    6.90
   6  -3  -2  111.79    8.40
  -3  -6  -2  113.49    7.70
   3   6  -2  149.88    8.40
   6  -3   2  121.09    7.30
  -3  -6   2  127.49    8.60
  -6   3   2  112.99    7.90
   6  -3   2  113.19    7.20
   4   6  -2  225.18   11.10
   6  -4  -2  219.18   12.70
   6  -4  -2  206.48   12.90
  -4  -6  -2  212.08   14.90
  -6   4  -2  218.38   11.30
  -4  -6  -2  204.08   12.40
  -4  -6  -2  201.98   12.10
   4   6  -2  219.88   12.70
  -6   4   2  227.68   12.40
   6  -4   2  199.78   11.00
   6  -4   2  222.08   11.60
  -4  -6   2  219.58   13.10
   5   6  -2  243.38   14.50
  -5  -6  -2  265.97   14.20
   6  -5  -2  265.87   14.50
   6  -5  -2  263.97   15.00
  -6   5  -2  252.27   13.20
   5   6  -2  247.08   12.90
  -5  -6  -2  261.17   14.60
  -5  -6  -2  260.57   16.90
   6  -5   2  242.08   13.20
   5   6   2  232.38   13.80
   6  -5   2  236.88   12.50
  -6   5   2  262.97   14.10
  -5  -6   2  253.47   15.00
  -6  -6  -2   18.90    3.80
   6   6  -2   26.40    3.40
   6  -6  -2   25.20    4.20
   6  -6  -2   26.20    4.80
  -6  -6  -2   25.40    4.40
  -6   6  -2   19.10    3.10
   6   6  -2   20.10    4.30
   6  -6   2   25.20    2.60
  -6  -6   2   25.40    5.00
   6  -6   2   21.30    3.30
   6   6   2   19.90    4.00
  -6   6   2   20.40    3.60
   6   6   2   26.10    4.20
  -6   7  -2    6.10    2.50
   6  -7  -2    2.10    2.50
   7   6  -2    6.40    2.60
   7   6  -2    3.20    3.00
  -7  -6  -2    7.70    2.80
   6  -7  -2   -1.10    4.00
   6  -7   2    3.00    1.80
   7   6   2   10.50    2.90
   7   6   2   10.90    3.60
   6  -7   2    3.30    2.40
  -6   7   2    4.10    2.80
  -7  -6   2   -0.40    3.00
   7   5  -2  760.52   37.50
  -5   7  -2  705.83   35.70
   5  -7  -2  772.12   36.50
  -7  -5  -2  729.13   36.50
   7   5  -2  767.02   35.60
   5  -7  -2  812.12   37.80
   5  -7   2  759.72   35.80
   5  -7   2  739.03   34.40
   7   5   2  744.83   36.30
   7   5   2  721.03   36.50
  -7  -5   2  742.03   37.40
  -5   7   2  740.43   36.40
   4  -7  -2   76.39    8.80
  -7  -4  -2   77.89    6.40
  -4   7  -2   75.59    6.30
   7   4  -2   79.99    7.60
   4  -7  -2   83.29    6.70
  -7  -4   2   96.59    7.80
   4  -7   2   72.59    6.00
   7   4   2   75.49    6.50
  -4   7   2   76.89    6.60
   4  -7   2   82.49    4.50
   7   4   2   79.09    6.80
   3  -7  -2  805.32   38.70
  -3   7  -2  753.62   37.00
  -7  -3  -2  755.32   37.20
   3  -7  -2  774.62   37.30
   7   3  -2  821.02   37.00
   7   3  -2  782.22   38.40
   7   3   2  764.52   37.30
   3  -7   2  770.42   36.90
  -3   7   2  774.82   37.40
  -7  -3   2  782.92   38.30
   7   3   2  773.72   37.50
   2  -7  -2   11.10    2.50
   7   2  -2    8.20    3.00
   7   2  -2    3.60    2.70
   2  -7  -2   14.20    4.10
  -7  -2  -2   12.30    2.30
  -7  -2   2    7.30    2.70
   7   2   2    5.70    2.40
   7   2   2    8.40    2.60
  -2   7   2    6.60    2.40
   7   1  -2   87.89    7.00
   1  -7  -2   88.39    8.60
   7   1  -2   88.99    7.70
  -7  -1  -2   86.19    6.20
   1  -7  -2   92.39    6.60
   7   1   2   83.09    6.80
  -7  -1   2   84.59    7.10
   1  -7   2  109.79    7.00
  -1   7   2   90.29    7.00
   7   1   2   81.99    6.50
   7   0  -2    3.90    2.80
   7   0  -2    4.20    2.50
   0  -7  -2   -6.50    4.50
  -7   0  -2    2.00    1.70
   0  -7  -2    5.80    2.40
   0  -7   2    8.70    2.50
   7   0   2    1.70    2.10
   7   0   2    2.00    2.00
   0   7   2    2.40    2.50
   0  -7   2   10.90    2.80
  -7   0   2    6.00    2.60
  -7   1  -2  532.05   25.40
   7  -1  -2  518.55   26.60
   7  -1  -2  543.35   27.10
  -1  -7  -2  506.15   26.00
  -1  -7  -2  517.25   28.30
   7  -1   2  523.95   26.00
   1   7   2  511.95   26.70
  -1  -7   2  521.15   26.50
  -7   1   2  528.95   26.80
  -1  -7   2  616.94   27.10
   7  -1   2  557.34   26.00
  -7   2  -2   62.59    4.60
   7  -2  -2   60.99    5.90
  -2  -7  -2   63.99    8.20
  -2  -7  -2   66.69    5.70
  -2  -7  -2   61.59    6.20
   7  -2  -2   56.49    6.40
   7  -2   2   61.69    5.30
  -2  -7   2   71.59    7.10
   2   7   2   61.79    6.30
   7  -2   2   63.39    5.30
  -7   2   2   60.59    5.90
   7  -3  -2   -2.70    3.30
  -3  -7  -2    7.10    2.80
  -3  -7  -2   10.20    4.70
  -7   3  -2   -1.60    1.30
   7  -3  -2    0.40    2.40
   7  -3   2   -0.90    1.60
  -7   3   2   -1.50    1.80
   7  -3   2    3.50    1.80
  -4  -7  -2   17.30    3.30
   7  -4  -2   20.50    4.30
  -4  -7   2   13.50    3.30
   7  -5  -2    2.80    3.50
  -7   5  -2    4.90    2.10
   7  -5  -2    2.60    3.00
   5   7  -2    4.70    2.10
  -5  -7  -2   13.10    3.30
   5   7  -2    4.60    2.70
  -5  -7   2    9.10    3.50
  -7   5   2    2.90    2.40
   7  -5   2    4.90    2.40
   7  -5   2    5.10    1.80
  -7   6  -2  257.67   14.20
   7  -6  -2  255.17   15.90
  -6  -7  -2  270.87   15.80
   7  -6  -2  264.97   15.40
   6   7   2  251.57   15.00
   6   7   2  258.07   15.00
   7  -6   2  257.57   13.20
  -7   6   2  283.47   15.20
   7  -6   2  266.67   14.40
  -7   7  -2  170.18   10.50
   7   7  -2  172.98   12.00
   7  -7  -2  166.18   12.60
   7   7  -2  166.18   10.10
  -7  -7  -2  177.58   11.80
   7  -7  -2  168.58   11.50
   7  -7   2  169.28    9.30
   7   7   2  173.88   11.50
   7  -7   2  181.28   10.70
   7   7   2  158.88   11.10
  -7  -7   2  177.58   12.50
  -7   7   2  174.28   11.20
  -7   8  -2  173.28   11.30
   8   7  -2  188.48   11.00
  -8  -7  -2  174.48   12.30
   7  -8  -2  168.18   12.20
   8   7  -2  178.68   14.40
   7  -8   2  161.78   11.10
  -7   8   2  179.58   12.00
   8   7   2  159.08   11.80
   8   7   2  173.88   12.10
   7  -8   2  206.78   10.10
  -8  -7   2  177.48   13.10
   8   6  -2   74.69    7.80
   6  -8  -2   87.69    9.30
  -8  -6  -2   79.39    7.40
   6  -8  -2   73.59    7.50
  -6   8  -2   69.79    6.90
   8   6  -2   77.19    6.80
   8   6   2   73.49    7.20
   8   6   2   62.49    7.40
  -8  -6   2   82.69    8.60
   6  -8   2   81.39    5.50
   6  -8   2   82.89    6.70
  -6   8   2   71.09    7.10
  -8  -5  -2   71.29    6.60
  -5   8  -2   58.89    6.00
   8   5  -2   67.79    6.20
   5  -8  -2   96.39    9.30
   8   5  -2   65.59    7.40
   5  -8  -2   62.89    6.30
  -5   8   2   66.39    6.40
   5  -8   2   65.99    5.90
   8   5   2   67.89    6.60
  -8  -5   2   57.39    7.30
   8   5   2   61.89    6.50
   5  -8   2   60.39    4.50
   8   4  -2   73.69    6.30
  -8  -4  -2   59.19    5.90
   4  -8  -2   58.19    8.30
   8   4  -2   58.09    7.20
   4  -8  -2   52.39    6.00
  -4   8  -2   58.19    5.80
  -4   8   2   61.79    6.10
   8   4   2   61.49    6.10
  -8  -4   2   60.49    7.40
   4  -8   2   63.09    4.20
   4  -8   2   64.89    5.70
   8   4   2   58.29    6.10
   8   3  -2  530.65   25.40
   3  -8  -2  502.35   27.50
   8   3  -2  514.55   26.90
  -8  -3  -2  518.55   25.60
   3  -8  -2  524.65   25.70
  -3   8  -2  496.45   25.50
  -8  -3   2  519.45   26.90
  -3   8   2  507.55   25.90
   8   3   2  495.15   25.40
   8   3   2  506.05   25.90
   3  -8   2  501.25   25.30
   2  -8  -2  213.88   14.80
   8   2  -2  222.18   12.50
  -8  -2  -2  228.48   12.40
   2  -8  -2  223.28   12.60
   8   2  -2  213.48   13.60
  -8  -2   2  222.58   13.50
   8   2   2  208.88   12.70
  -2   8   2  206.38   12.90
   8   2   2  219.58   12.40
   2  -8   2  217.78   12.60
   8   1  -2  583.54   29.30
   8   1  -2  563.54   28.00
  -8  -1  -2  571.94   27.60
   1  -8  -2  579.44   28.10
   1  -8  -2  566.94   29.80
  -1   8   2  550.64   28.40
   1  -8   2  551.64   27.90
   8   1   2  560.64   27.70
  -8  -1   2  569.34   28.80
   8   1   2  574.94   28.20
   8   0  -2   79.79    7.60
   0  -8  -2  100.59   10.50
  -8   0  -2   62.19    5.30
   8   0  -2   75.99    6.70
  -8   0   2   72.99    6.80
   8   0   2   59.89    5.90
   0  -8   2   65.39    7.10
   8   0   2   64.29    5.90
   0  -8   2   68.79    6.80
   8  -1  -2   21.80    4.10
  -8   1  -2   20.10    2.90
   8  -1  -2   20.10    4.20
  -8   1   2   24.90    4.00
   8  -1   2   24.20    3.80
  -1  -8   2   32.60    5.40
   8  -1   2   26.50    3.60
  -1  -8   2   15.80    4.10
  -2  -8  -2   17.10    4.00
   8  -2  -2   18.10    4.00
   8  -2  -2   24.80    4.30
  -2  -8  -2   11.40    5.80
  -8   2  -2   20.80    2.80
   8  -2   2   18.40    3.40
   8  -2   2   16.70    3.00
  -8   2   2   15.20    3.50
   2   8   2   20.00    4.10
  -8   3  -2   79.39    5.80
   8  -3  -2   55.39    7.20
  -3  -8  -2   97.09    7.50
   8  -3  -2   74.49    7.40
  -3  -8  -2   82.89    8.10
  -3  -8  -2   89.79    9.90
   8  -3   2   82.29    6.70
   8  -3   2   74.59    5.80
  -8   3   2   76.29    6.80
   4   8  -2  165.08    8.70
  -8   4  -2  152.68    9.60
  -4  -8  -2  202.98   14.80
   8  -4  -2  169.28   11.40
  -4  -8  -2  180.88   12.00
  -4  -8  -2  171.68   10.80
   8  -4  -2  162.28   11.80
   8  -4   2  149.88    9.10
  -4  -8   2  169.48   11.50
   8  -4   2  148.79   10.00
  -8   4   2  159.78   10.50
   8  -5  -2    2.80    3.80
  -5  -8  -2   -4.60    5.80
  -5  -8  -2   -0.50    2.60
  -8   5  -2   -3.60    1.70
   8  -5  -2   -0.70    2.50
   5   8  -2    2.10    2.90
   5   8  -2   -1.50    1.70
  -5  -8   2    0.00    3.00
   8  -5   2    1.30    1.80
  -8   5   2   -1.70    2.20
   8  -5   2   -3.20    2.20
   6   8  -2   25.00    5.30
  -8   6  -2   25.40    3.90
   6   8  -2   21.40    3.30
   8  -6  -2   23.50    4.90
  -8   6   2   21.20    4.10
   8  -6   2   26.40    3.20
  -6  -8   2   28.00    5.80
   8  -6   2   24.90    4.10
   7   8  -2   26.10    3.80
  -7  -8  -2   28.90    5.90
  -8   7  -2   22.00    4.10
   8  -7  -2   29.20    5.20
   8  -7  -2   19.20    6.20
  -8   7   2   25.30    4.70
   8  -7   2   19.40    4.30
   7   8   2   22.00    4.70
   8  -7   2   25.30    3.30
   7   8   2   20.90    5.10
  -7  -8   2   31.10    5.70
   8  -8  -2  193.08   13.40
   8  -8  -2  201.48   14.80
  -8   8  -2  220.58   12.60
  -8  -8  -2  192.18   13.70
   8   8  -2  195.18   11.80
  -8  -8   2  209.58   14.70
   8  -8   2  227.58   12.80
  -8   8   2  206.38   13.20
   8   8   2  196.68   13.20
   8  -8   2  207.68   11.40
   8   8   2  198.88   13.60
  -9  -8  -2    1.40    3.50
   8  -9  -2    6.00    5.60
   9   8  -2   10.70    3.50
   8  -9  -2    6.40    4.60
  -8   9   2    5.80    3.90
  -9  -8   2    1.50    3.70
   9   8   2    6.30    3.60
   8  -9   2   -0.30    2.80
   9   8   2    2.20    3.70
   8  -9   2    5.80    2.90
  -9  -7  -2  170.98   12.40
   7  -9  -2  173.68   12.20
   9   7  -2  174.18   11.00
   7  -9  -2  164.68   13.90
  -7   9  -2  175.58   11.50
   9   7   2  174.48   12.30
  -9  -7   2  177.38   13.30
   9   7   2  192.68   12.20
   7  -9   2  180.08   11.30
  -7   9   2  177.78   12.00
   7  -9   2  178.28   10.10
   6  -9  -2  249.68   14.90
  -6   9  -2  239.58   14.40
   6  -9  -2  242.98   16.80
  -9  -6  -2  237.88   14.90
   9   6  -2  245.58   14.20
   9   6  -2  253.47   16.50
   9   6   2  231.78   14.90
   6  -9   2  250.87   14.20
   9   6   2  250.87   14.70
  -6   9   2  246.88   14.90
   6  -9   2  238.08   12.90
  -9  -6   2  263.57   16.30
   9   5  -2  342.67   17.10
   5  -9  -2  359.16   17.80
   9   5  -2  301.37   18.70
  -5   9  -2  284.37   17.20
  -9  -5  -2  295.67   17.40
   5  -9   2  292.67   16.80
   5  -9   2  279.87   15.20
   9   5   2  287.67   17.10
  -9  -5   2  301.47   18.60
   9   5   2  294.77   17.50
  -5   9   2  362.66   18.00
   9   4  -2  279.87   17.20
   4  -9  -2  286.17   17.90
  -4   9  -2  272.07   15.80
   9   4  -2  302.07   15.50
  -9  -4  -2  282.57   16.00
   4  -9  -2  272.87   15.90
   4  -9   2  267.07   15.40
   9   4   2  275.97   16.20
  -4   9   2  281.27   16.20
   9   4   2  275.27   15.60
  -9  -4   2  276.77   17.10
   9   3  -2   37.00    5.70
  -9  -3  -2   46.30    5.20
   9   3  -2   46.10    5.70
   9   3   2   42.80    5.50
   3  -9   2   41.50    5.30
   9   3   2   34.30    5.00
  -9  -3   2   42.00    6.00
   9   2  -2    7.80    3.60
   2  -9  -2    1.10    4.20
   2  -9  -2    1.00    2.20
   9   2  -2   10.70    3.40
  -9  -2  -2   -0.20    1.80
  -9  -2   2    2.20    2.80
   9   2   2    7.40    2.90
   9   2   2    5.60    2.60
  -2   9   2   -1.50    2.40
  -9  -1  -2  188.38   11.00
   9   1  -2  179.38   12.90
   9   1  -2  185.68   11.50
   1  -9  -2  191.58   11.60
   9   1   2  185.68   11.20
   1  -9   2  179.78   12.00
   9   1   2  187.38   11.70
  -9  -1   2  186.38   12.30
  -1   9   2  196.78   12.30
  -9   0  -2  164.18   10.00
   0  -9  -2  162.88   10.80
   9   0  -2  168.88   11.00
   0  -9  -2  182.28   13.90
   9   0  -2  173.08   12.20
   9   0   2  154.38   10.20
   9   0   2  161.88   10.60
   0  -9   2  179.88   11.30
  -9   0   2  172.48   11.40
   0   9   2  162.68   11.50
   0  -9   2  168.28   11.30
   9  -1  -2  552.94   29.10
   9  -1  -2  544.95   28.10
  -9   1  -2  557.64   27.20
  -1  -9  -2  550.84   27.90
  -1  -9  -2  560.24   30.30
  -9   1   2  568.74   28.70
   1   9   2  550.04   28.80
   9  -1   2  557.14   27.30
  -1  -9   2  554.34   28.50
  -1  -9   2  592.44   29.00
   9  -1   2  555.94   28.00
  -9   2  -2   51.29    5.00
  -2  -9  -2   56.99    8.40
   9  -2  -2   51.59    6.60
  -2  -9  -2   63.79    7.60
  -2  -9  -2   66.29    6.60
   9  -2  -2   49.70    6.10
   9  -2   2   51.59    5.40
  -2  -9   2   66.29    7.50
   9  -2   2   52.69    5.90
  -2  -9   2   80.29    9.40
  -3  -9  -2   47.40    6.50
  -3  -9  -2   52.99    6.90
  -9   3  -2   41.40    4.60
   9  -3  -2   42.10    6.10
   9  -3  -2   45.60    6.20
  -3  -9  -2   50.79    8.30
   9  -3   2   45.60    4.70
   9  -3   2   42.10    5.70
  -3  -9   2   46.30    6.90
  -9   3   2   45.70    5.70
  -9   4  -2   18.10    3.40
   9  -4  -2   34.50    5.50
  -4  -9  -2   30.50    5.80
  -4  -9  -2   22.50    7.10
   9  -4  -2   29.40    5.50
  -9   4   2   24.20    4.30
   9  -4   2   27.40    3.40
   9  -4   2   21.20    4.10
  -4  -9   2   29.90    5.50
   9  -5  -2  457.15   24.80
  -9   5  -2  467.05   22.90
   9  -5  -2  429.76   24.70
  -5  -9  -2  460.15   27.20
  -5  -9  -2  468.55   24.90
   5   9  -2  400.86   21.60
   9  -5   2  486.15   22.20
   9  -5   2  450.85   23.50
  -9   5   2  459.25   24.00
  -5  -9   2  468.85   25.30
  -9   6  -2   42.70    5.60
   9  -6  -2   79.09   10.10
   9  -6  -2   52.69    7.30
  -6  -9  -2   59.79    7.80
  -9   6   2   61.79    6.80
   9  -6   2   54.99    6.70
   9  -6   2   50.69    5.10
  -7  -9  -2   89.69    9.70
   9  -7  -2  111.39   10.50
   9  -7  -2  101.49    9.10
  -9   7  -2   84.29    7.10
   7   9  -2   68.99    6.60
   7   9   2   85.99    8.70
   9  -7   2   83.39    6.50
   9  -7   2   75.09    7.80
  -7  -9   2   88.39   10.10
  -9   7   2   98.09    8.30
  -8  -9  -2  300.77   18.40
   8   9  -2  264.17   15.20
   9  -8  -2  296.77   18.00
   9  -8  -2  292.67   18.70
  -9   8   2  290.87   17.10
   8   9   2  263.07   16.90
   9  -8   2  285.77   16.60
   9  -8   2  283.27   15.10
   8   9   2  331.87   17.50
  -8  -9   2  260.37   18.30
   9   9  -2   -3.20    2.70
   9  -9  -2    8.30    5.10
   9   9   2    1.90    3.60
   9  -9   2   -0.90    2.60
  -9   9   2    0.70    3.30
  -9  -9   2    0.80    3.70
   9 -10  -2    6.50    5.70
  10   9  -2   10.60    3.40
  -9  10   2    6.20    3.70
  10   9   2   10.80    4.30
   9 -10   2    2.00    2.90
 -10  -9   2    5.10    4.00
   8 -10  -2  142.69   13.80
  10   8  -2  139.99   10.30
   8 -10   2  175.88    9.90
 -10  -8   2  140.29   12.40
  10   8   2  147.19   11.20
  -8  10   2  147.79   11.30
  10   7  -2   -1.20    3.20
   7 -10  -2    5.90    5.80
 -10  -7   2   -0.20    3.70
  10   7   2   -0.90    3.60
  -7  10   2    7.10    3.60
  10   7   2    3.90    3.40
   7 -10   2    2.20    2.60
   7 -10   2   -5.10    2.50
  -6  10  -2   40.10    5.90
   6 -10  -2   38.50    8.50
 -10  -6  -2   53.59    6.80
   6 -10  -2   50.39    8.30
  10   6  -2   40.80    5.80
  10   6   2   35.70    5.90
  -6  10   2   47.90    6.60
 -10  -6   2   44.90    6.90
   6 -10   2   45.40    6.00
   6 -10   2   40.90    5.10
  10   6   2   44.10    5.90
  -5  10  -2   21.50    4.50
  10   5  -2   21.70    4.50
   5 -10  -2   19.10    6.30
  10   5  -2   23.00    5.50
 -10  -5  -2   20.70    4.40
   5 -10  -2   15.20    3.90
  -5  10   2   27.20    5.30
  10   5   2   17.70    4.40
 -10  -5   2   33.40    6.50
   5 -10   2   23.80    4.20
  10   5   2   22.90    4.80
   4 -10  -2  154.48   14.10
 -10  -4  -2  161.58   11.00
   4 -10  -2  161.68   11.20
  10   4  -2  172.78   12.80
  -4  10  -2  172.48   11.30
  10   4  -2  157.18   11.00
  -4  10   2  173.78   11.80
  10   4   2  165.68   11.10
  10   4   2  164.88   11.70
 -10  -4   2  165.18   12.90
   4 -10   2  167.48   10.90
  10   3  -2   28.30    4.80
   3 -10  -2   36.10    5.10
  10   3  -2   25.90    5.60
 -10  -3  -2   25.80    4.40
  10   3   2   32.60    4.90
   3 -10   2   41.80    5.80
 -10  -3   2   30.90    5.70
  10   3   2   39.60    5.70
  -3  10   2   55.79    7.40
  10   2  -2  531.85   26.20
  10   2  -2  451.65   24.10
   2 -10  -2  482.15   26.70
   2 -10  -2  451.55   24.30
 -10  -2  -2  452.55   24.00
 -10  -2   2  486.75   25.60
  -2  10   2  447.66   24.90
  10   2   2  468.35   24.80
   2 -10   2  472.25   24.40
  10   2   2  442.66   23.70
 -10  -1  -2    8.50    2.90
   1 -10  -2   16.50    3.60
  10   1  -2   12.30    4.50
  10   1  -2   11.00    3.80
  10   1   2   12.80    3.50
   1 -10   2   11.50    4.20
 -10  -1   2    7.40    3.70
  -1  10   2   25.60    4.70
  10   1   2   11.70    3.70
 -10   0  -2   47.70    5.40
  10   0  -2   41.00    5.80
  10   0  -2   56.79    7.70
   0 -10   2   43.90    6.20
 -10   0   2   48.70    6.60
   0 -10   2   69.69    7.40
  10   0   2   49.10    5.80
  10   0   2   53.69    6.30
  10  -1  -2   82.89    8.50
  10  -1  -2  103.49    9.70
 -10   1  -2   98.69    7.10
  10  -1   2   84.89    8.00
 -10   1   2   94.69    8.60
  10  -1   2   92.69    7.30
 -10   2  -2  143.49    9.10
  10  -2  -2  132.09   10.80
  -2 -10  -2  148.29   11.70
  10  -2  -2  112.29   10.60
  -2 -10  -2  117.89   13.80
  -2 -10   2  157.88   11.60
 -10   2   2  146.39   10.80
  10  -2   2  142.39   10.20
  -2 -10   2  167.58   13.10
  10  -2   2  144.79    9.20
  10  -3  -2  520.85   27.80
 -10   3  -2  499.65   25.50
  -3 -10  -2  509.65   29.70
  10  -3  -2  510.15   27.30
  -3 -10  -2  492.65   27.60
  10  -3   2  514.35   26.70
  -3 -10   2  536.15   27.70
  -3 -10   2  521.25   28.50
 -10   3   2  535.55   27.20
  10  -3   2  519.95   25.30
 -10   4  -2   56.29    5.70
  10  -4  -2   63.79    8.00
  10  -4  -2   62.79    7.80
  -4 -10  -2   74.49   10.10
  -4 -10  -2   62.59   10.20
  10  -4   2   48.20    6.80
  10  -4   2   60.09    5.70
 -10   4   2   55.99    6.80
  -4 -10   2   63.19    8.10
  -5 -10  -2   44.30    9.10
  -5 -10  -2   32.60    6.00
  10  -5  -2   31.20    5.60
  10  -5  -2   24.50    5.60
 -10   5  -2   34.90    4.70
  -5 -10   2   28.00    5.90
  10  -5   2   29.80    4.90
 -10   5   2   31.30    5.00
  10  -5   2   34.80    4.10
  10  -6  -2   31.50    5.90
  10  -6  -2   30.40    6.60
   6  10  -2   24.70    3.60
 -10   6  -2   34.50    4.70
  -6 -10  -2   37.40    6.60
  -6 -10   2   49.70    7.30
 -10   6   2   33.90    5.60
  10  -6   2   32.70    4.10
  10  -6   2   30.20    5.20
   7  10  -2  195.98   12.20
  10  -7  -2  229.98   16.20
  10  -7  -2  227.98   15.80
   7  10   2  278.07   15.10
  10  -7   2  223.38   14.30
  -7 -10   2  221.38   16.30
 -10   7   2  227.28   14.50
  10  -7   2  221.68   12.60
   8  10  -2   -0.40    2.60
  10  -8  -2    1.40    4.80
   8  10   2    3.50    4.30
  10  -8   2   -2.30    2.60
  -8 -10   2    4.30    3.90
 -10   8   2    0.30    2.80
   9  10  -2  133.49    9.70
  10  -9  -2  169.78   13.70
   9  10   2  167.48   11.90
  10  -9   2  156.78   10.00
 -10   9   2  165.68   11.90
  -9 -10   2  153.58   13.20
  10 -10  -2   18.90    6.30
  10  10  -2    8.50    3.40
  10 -10   2    5.20    3.30
 -10 -10   2    6.50    4.30
 -10  10   2    1.30    3.50
  10  10   2    7.60    4.70
  10 -11  -2    3.30    5.80
  11  10  -2    3.40    3.60
  10 -11   2    8.20    3.60
 -11 -10   2   10.70    5.10
 -10  11   2    8.20    3.90
  11  10   2    4.00    4.30
  11   9  -2    1.60    3.20
   9 -11  -2   -0.70    5.10
   9 -11   2    1.80    3.10
 -11  -9   2    3.70    3.90
  -9  11   2   -0.80    3.10
  11   9   2    6.30    3.90
  11   8  -2   -1.70    3.40
   8 -11  -2    8.10    5.80
  11   8   2    4.80    3.80
  -8  11   2    5.80    3.60
   8 -11   2    5.10    3.00
 -11  -8   2    1.40    3.90
   7 -11  -2   65.79    9.80
  11   7  -2   85.39    7.90
 -11  -7   2   78.89    9.40
  -7  11   2   69.69    8.20
   7 -11   2   73.39    6.60
  11   7   2   79.49    8.30
   6 -11  -2  275.47   19.60
  11   6  -2  286.27   16.70
  11   6   2  284.27   17.00
  11   6   2  300.17   23.40
  -6  11   2  298.17   17.60
   6 -11   2  283.87   15.20
 -11  -6   2  284.37   18.70
   5 -11  -2   97.69   12.80
  11   5  -2  134.09    9.80
   5 -11   2  110.89    9.40
  -5  11   2  120.39   10.40
  11   5   2  122.29   10.00
  11   5   2  127.89   10.60
 -11  -5   2  126.69   11.80
  11   4  -2  324.07   17.50
 -11  -4  -2  304.27   17.70
   4 -11  -2  304.37   19.90
  -4  11  -2  294.97   17.80
  11   4   2  311.37   18.40
  -4  11   2  314.07   18.30
   4 -11   2  302.57   17.40
  11   4   2  300.57   17.30
 -11  -4   2  310.27   19.20
  11   3  -2  167.28   11.50
 -11  -3  -2  171.88   11.40
   3 -11  -2  166.78   14.10
  11   3  -2  158.48   12.50
  11   3   2  156.68   11.80
   3 -11   2  152.98   11.50
 -11  -3   2  168.58   12.50
  -3  11   2  176.28   12.50
  11   3   2  167.28   11.10
   2 -11  -2   63.99    9.10
  11   2  -2   60.79    8.20
 -11  -2  -2   59.39    6.50
  11   2  -2   59.09    6.80
  -2  11   2   59.49    8.20
 -11  -2   2   59.09    7.60
  11   1  -2   12.80    4.60
  11   1  -2    8.20    4.00
   1 -11  -2    3.30    6.50
 -11  -1  -2   10.40    3.00
   1 -11   2    6.30    3.90
  11   1   2   11.20    3.80
  -1  11   2    9.30    4.30
 -11  -1   2   10.50    3.90
  11   1   2   11.90    3.40
  11   0  -2  398.76   22.80
 -11   0  -2  416.26   22.00
  11   0  -2  399.56   24.00
   0 -11  -2  414.96   25.50
  11   0   2  413.76   21.80
   0 -11   2  457.95   23.30
   0  11   2  455.65   24.10
  11   0   2  411.86   22.90
   0 -11   2  454.85   23.70
 -11   0   2  434.46   23.70
  -1 -11  -2   22.60    5.80
 -11   1  -2   18.60    3.40
  -1 -11  -2   14.00    6.80
  11  -1  -2   16.60    4.90
  11  -1  -2    9.20    4.60
  11  -1   2   17.30    3.70
  -1 -11   2   18.00    4.60
  -1 -11   2   25.80    6.10
 -11   1   2   19.10    4.50
   1  11   2   24.90    5.50
  11  -1   2   16.70    4.00
  11  -2  -2   32.70    5.60
 -11   2  -2   34.10    4.80
  -2 -11  -2   37.10    8.30
  11  -2  -2   23.60    5.50
  -2 -11  -2   42.70    6.70
 -11   2   2   29.00    5.10
  -2 -11   2   41.30    8.30
  11  -2   2   29.00    4.30
  -2 -11   2   34.40    6.60
  11  -2   2   46.00    6.30
  11  -4  -2   87.09    9.90
  -4 -11  -2   92.59   11.60
 -11   4  -2  101.99    7.90
  11  -4  -2   96.09    9.70
  -4 -11  -2  108.19   13.90
  11  -4   2  113.09    7.70
  11  -4   2   87.79    9.00
 -11   4   2  104.59    9.00
  -4 -11   2  124.29   11.10
  11  -5  -2  326.77   20.80
  -5 -11  -2  418.36   24.30
  11  -5  -2  363.86   20.70
  -5 -11  -2  340.77   21.60
  11  -5   2  351.46   17.90
 -11   5   2  339.67   19.80
  -5 -11   2  332.27   21.10
  11  -5   2  332.57   19.90
  11  -6  -2  104.99   12.70
  11  -6  -2  120.49   11.60
  -6 -11   2  125.29   11.70
  11  -6   2  103.19    7.70
   6  11   2   85.79    9.70
  11  -6   2   86.79    9.00
 -11   6   2   95.29    9.20
  11  -7  -2  245.98   17.00
 -11   7   2  242.68   15.40
   7  11   2  248.48   15.60
  11  -7   2  233.18   13.60
  -7 -11   2  254.17   17.70
   8  11  -2    5.20    2.80
   8  11   2   13.50    4.70
 -11   8   2    5.60    3.30
  11  -8   2    1.50    3.00
  -8 -11   2    7.80    4.80
   9  11  -2   29.50    4.30
  11  -9  -2   29.00    7.40
  11  -9   2   30.60    4.70
   9  11   2   34.10    6.10
  -9 -11   2   28.30    6.30
 -11   9   2   33.40    6.00
  10  11  -2    5.60    3.30
  11 -10  -2    0.10    5.40
 -10 -11   2   10.70    5.10
 -11  10   2   15.10    4.40
  11 -10   2    8.90    3.70
  10  11   2   16.40    5.40
  11 -11  -2  140.39   14.30
  11  11  -2  160.28   10.70
 -11 -11   2  149.39   13.60
  11 -11   2  121.59   10.90
  11  11   2  145.29   12.00
  12  11  -2   30.60    5.30
  11 -12  -2   39.80    8.20
  11 -12   2   24.60    5.30
 -12 -11   2   27.50    7.00
  12  11   2   26.30    6.10
  10 -12  -2   26.00    7.80
  12  10  -2   33.90    5.40
  10 -12   2   25.20    5.00
 -12 -10   2   25.20    6.20
  12   9  -2  149.79   11.20
   9 -12  -2  159.68   15.00
  12   9   2  164.78   12.20
  -9  12   2  149.99   12.20
 -12  -9   2  148.39   13.20
  12   8  -2    0.50    3.50
   8 -12  -2    1.10    5.50
  -8  12   2   -3.00    3.20
  12   8   2   -1.80    3.50
 -12  -8   2   -1.60    3.60
   8 -12   2    1.10    4.10
   7 -12  -2   12.90    6.60
  12   7  -2   21.50    4.60
  12   7   2   22.70    5.00
 -12  -7   2   21.50    5.70
  -7  12   2   15.80    4.60
  12   6  -2   21.30    4.70
   6 -12  -2   12.70    6.70
  12   6   2   16.10    4.60
 -12  -6   2   17.60    5.50
  -6  12   2   26.80    5.50
   5 -12  -2   41.00    8.10
  12   5  -2   44.30    6.20
  12   5   2   33.50    5.90
 -12  -5   2   41.00    7.00
  -5  12   2   34.20    5.80
  12   4  -2   -0.30    3.50
   4 -12  -2   -1.90    5.30
 -12  -4   2    0.10    3.60
  -4  12   2   -0.10    3.20
  12   4   2   -5.40    3.20
  12   3  -2   78.59    8.80
   3 -12  -2   81.39   10.10
  12   3   2   79.59    8.00
   3 -12   2   94.29    9.40
  -3  12   2   87.29    9.20
 -12  -3   2   77.29    9.10
  12   3   2   84.39    8.90
  12   2  -2   11.40    5.20
  12   2   2   29.30    5.60
 -12  -2   2   29.20    6.20
  -2  12   2   30.50    6.10
   2 -12   2   35.10    5.90
  12   2   2   28.80    4.70
  12   1  -2  173.68   15.00
   1 -12  -2  162.28   15.10
  12   1  -2  171.88   12.40
  12   1   2  188.48   12.90
   1 -12   2  169.98   12.80
   1 -12   2  195.98   12.90
 -12  -1   2  190.08   13.40
  12   1   2  183.58   11.50
  -1  12   2  176.98   14.30
  12   0  -2   55.39    7.80
   0 -12  -2   99.49   12.40
  12   0  -2   55.29    7.10
   0 -12   2   46.90    7.30
   0  12   2   71.89    9.90
 -12   0   2   45.90    6.70
   0 -12   2   65.09    8.10
  12   0   2   63.49    6.70
  12   0   2   61.19    7.50
  -1 -12  -2   67.19   10.90
  12  -1  -2   61.49    7.70
  12  -1  -2   79.09    9.60
  12  -1   2   68.49    7.80
 -12   1   2   59.79    8.20
   1  12   2   60.59    8.30
  -1 -12   2   79.49    9.60
  12  -1   2   66.89    6.70
  -2 -12  -2  324.57   23.40
  -2 -12  -2  392.56   22.40
  12  -2  -2  343.37   22.00
  12  -2  -2  335.07   20.80
  -2 -12   2  436.06   23.50
 -12   2   2  367.56   21.40
  12  -2   2  361.06   21.00
  12  -2   2  356.26   19.20
  -2 -12   2  423.96   22.30
  -3 -12  -2    7.80    5.10
  12  -3  -2    5.70    4.70
  12  -3  -2    3.30    4.50
  -3 -12   2    7.90    5.90
 -12   3   2    3.30    3.40
  -3 -12   2    1.00    5.40
  12  -3   2    8.30    3.20
  12  -3   2    4.20    3.60
  12  -4  -2   71.39    8.90
  -4 -12  -2   78.59   11.60
  12  -4   2   61.39   10.80
 -12   4   2   54.79    7.50
  12  -4   2   69.19    6.60
  -4 -12   2   97.39   11.40
  -5 -12  -2    1.70    7.60
  12  -5  -2   -6.60    4.40
  12  -5   2    3.50    2.80
  -5 -12   2   -4.50    3.50
 -12   5   2   -0.60    2.80
  12  -6  -2  111.09   11.60
  12  -6   2  116.09    8.60
 -12   6   2  111.39    9.90
  -6 -12   2  117.29   12.10
   6  12   2  137.29   10.70
  12  -7  -2   49.00    8.30
   7  12   2   62.69    7.80
  -7 -12   2   56.69    9.70
 -12   7   2   45.30    6.50
  12  -7   2   61.29    6.30
  12  -8  -2  207.68   15.30
  -8 -12   2  164.78   14.70
   8  12   2  176.38   12.70
 -12   8   2  157.68   12.30
  12  -8   2  156.78   10.90
  12  -9  -2   65.99    9.60
  -9 -12   2   61.69    9.30
   9  12   2   87.89    9.10
 -12   9   2   68.39    8.50
  12  -9   2   65.79    7.40
  12 -10  -2    2.00    5.80
 -10 -12   2    1.70    4.60
  10  12   2   13.40    5.10
  12 -10   2    7.60    3.70
  12 -11  -2    2.60    6.30
  11  12   2    4.50    4.90
 -11 -12   2    2.70    4.50
  12 -11   2   -1.10    4.10
  12 -12  -2   -2.60    6.30
  12 -12   2    0.60    4.00
  12  12   2   -0.40    4.30
  12 -13  -2   67.49   11.20
  13  12   2   71.59    9.20
  13  11  -2    4.70    4.30
  11 -13  -2    2.10    6.60
  13  11   2    5.30    5.00
  10 -13  -2    3.00    6.30
  13  10  -2    4.60    4.00
  13  10   2    1.00    4.60
   9 -13  -2    4.40    6.80
  13   9  -2    6.50    4.00
  13   9   2    0.70    4.40
 -13  -9   2    6.80    4.40
  13   8  -2    6.50    4.10
   8 -13  -2   -2.30    6.20
  13   8   2    5.50    4.20
  -8  13   2    4.80    3.90
 -13  -8   2    7.20    4.60
   7 -13  -2  200.68   17.20
  13   7  -2  242.78   14.40
 -13  -7   2  215.88   16.40
  -7  13   2  199.98   14.90
  13   7   2  215.38   14.40
   6 -13  -2   -7.80    5.40
  13   6  -2   19.30    4.60
  -6  13   2    2.20    3.60
  13   6   2    6.80    4.00
 -13  -6   2    6.10    4.90
   5 -13  -2  175.78   15.30
  13   5  -2  177.08   12.40
 -13  -5   2  175.08   13.80
  -5  13   2  178.78   13.40
  13   5   2  170.48   12.10
   4 -13  -2   -0.40    5.30
  13   4  -2    3.30    3.80
 -13  -4   2    3.30    4.00
  13   4   2    3.80    3.30
  -4  13   2    6.10    3.60
  13   3  -2    0.60    4.10
   3 -13  -2   -7.90    5.10
 -13  -3   2   -0.40    3.30
  13   3   2   -1.90    3.10
  -3  13   2    1.60    4.00
   2 -13  -2    6.20    6.00
  13   2  -2   -3.10    3.50
  13   2   2   -0.50    3.00
  -2  13   2    0.00    4.10
 -13  -2   2   -1.90    3.20
   1 -13  -2  154.78   14.90
  13   1  -2  152.18   11.90
  -1  13   2  143.89   13.00
  13   1   2  150.48   10.50
 -13  -1   2  158.38   12.20
   1 -13   2  143.69   12.20
   0 -13  -2  106.19   13.50
  13   0  -2   87.49    9.60
 -13   0   2  104.49    9.90
   0  13   2  111.09   11.20
  13   0   2  102.29    8.30
   0 -13   2   95.99   10.20
  -1 -13  -2  147.29   14.80
  13  -1  -2  126.39   11.00
  -1 -13   2  135.29   13.10
  13  -1   2  146.29    9.70
 -13   1   2  126.29   11.20
  -2 -13  -2   25.30    7.50
  13  -2  -2    4.90    4.10
  13  -2   2   10.50    3.30
  -2 -13   2    4.80    6.00
 -13   2   2    4.20    3.70
  -3 -13  -2   25.60    8.10
  13  -3  -2   21.50    5.60
 -13   3   2   21.10    4.80
  -3 -13   2   43.90    8.50
  13  -3   2   28.00    4.30
  13  -4  -2  202.48   14.90
  -4 -13  -2  250.37   18.70
  -4 -13   2  191.58   16.60
 -13   4   2  202.78   14.00
  13  -4   2  206.58   12.40
  -5 -13  -2   52.79   11.10
  13  -5  -2   47.80    7.90
 -13   5   2   44.20    6.90
  -5 -13   2   76.09   10.40
  13  -5   2   63.89    6.80
  13  -6  -2  245.28   18.10
   6  13   2  274.97   17.20
 -13   6   2  275.57   17.30
  13  -6   2  277.97   15.60
  -6 -13   2  307.77   19.70
  13  -7  -2    9.80    5.80
  -7 -13   2    5.30    5.50
  13  -7   2    4.00    3.10
 -13   7   2    2.00    3.20
   7  13   2    6.00    4.40
  13  -8  -2    0.10    5.30
   8  13   2    3.50    4.60
  13  -8   2    2.00    3.30
  -8 -13   2    5.50    4.80
  13  -9  -2   24.60    7.50
  13  -9   2   31.50    5.20
  -9 -13   2   29.00    6.90
   9  13   2   39.60    6.50
  13 -10  -2  100.49   13.40
  13 -10   2  111.29    9.90
  10  13   2  138.89   11.70
 -10 -13   2   98.49   12.40
  13 -11  -2   19.00    7.60
  13 -11   2   24.00    5.40
  11  13   2   25.10    6.40
  13 -12  -2    2.30    6.70
  12  13   2    6.00    4.90
  13 -12   2    4.90    4.60
  13 -13  -2    3.00    7.30
  13  13   2    4.90    5.30
  13 -14  -2   14.70    8.40
  14  13   2   31.90    7.20
  14  12   2    0.20    4.90
  14  11  -2    0.10    4.20
  11 -14  -2   10.40    7.40
  14  11   2    2.50    5.00
  14  10  -2   58.59    7.50
  10 -14  -2   66.19   11.30
  14  10   2   60.49    8.70
   9 -14  -2   -8.30    6.10
  14   9  -2    1.60    3.90
  14   9   2    0.90    4.60
  14   8  -2   31.10    5.60
   8 -14  -2   20.70    8.00
  14   8   2   20.40    5.40
  14   7  -2   -1.30    3.70
   7 -14  -2   -4.10    5.90
 -14  -7   2    2.40    4.60
  -7  14   2    6.70    5.20
  14   7   2    2.00    4.00
   6 -14  -2   12.10    6.90
  14   6  -2   27.50    5.20
  14   6   2   25.40    5.10
  -6  14   2    8.80    5.20
 -14  -6   2    6.10    4.50
  14   5  -2   58.69    7.40
   5 -14  -2   42.60    8.40
  14   5   2   46.60    6.60
  -5  14   2   56.29    8.10
 -14  -5   2   65.59    9.00
  14   4  -2   97.89    9.60
   4 -14  -2   81.19   10.80
 -14  -4   2   90.29   10.00
  -4  14   2   90.59   10.40
  14   4   2   86.59    8.60
   3 -14  -2  108.19   13.30
  14   3  -2  136.69   11.00
  -3  14   2  124.39   11.80
 -14  -3   2  125.19   11.70
  14   3   2  126.39   10.00
   2 -14  -2   24.30    7.50
  14   2  -2   38.40    6.30
  14   2   2   30.10    4.90
  -2  14   2   34.50    7.40
 -14  -2   2   27.40    6.00
  14   1  -2    4.20    4.20
   1 -14  -2   10.80    7.00
 -14  -1   2    5.00    4.10
   1 -14   2    3.10    4.00
  14   1   2    3.80    3.20
  -1  14   2   10.20    5.30
  14   0  -2    4.50    4.20
   0 -14  -2    4.30    6.10
 -14   0   2    0.20    3.40
   0 -14   2   -0.40    3.50
   0  14   2    0.50    3.90
  14   0   2    1.50    2.80
  -1 -14  -2   96.59   12.70
  14  -1  -2   79.49    9.40
  -1 -14   2   87.49   11.80
 -14   1   2   78.89    9.40
  14  -1   2   94.79    7.80
  -2 -14  -2    4.70    6.70
  14  -2  -2    6.60    4.40
  14  -2   2    1.80    2.90
  -2 -14   2   16.00    7.40
 -14   2   2    1.80    3.60
  14  -3  -2  177.58   13.00
  -3 -14  -2  128.79   15.10
 -14   3   2  135.49   11.40
  14  -3   2  120.39    9.70
  14  -4  -2   -4.40    4.30
  -4 -14   2    3.80    5.60
  14  -4   2   -3.30    2.90
 -14   4   2   -2.00    2.80
  14  -5  -2   15.90    5.80
  -5 -14  -2    9.40    7.90
  14  -5   2   -5.40    3.10
  -5 -14   2    3.50    4.50
 -14   5   2    0.80    3.30
  14  -6  -2   30.60    7.50
  14  -6   2   43.20    5.80
   6  14   2   69.79    8.90
  -6 -14   2   37.50    7.80
  14  -7  -2   53.69    9.20
  -7 -14   2   41.60    8.60
  14  -7   2   41.90    5.80
   7  14   2   57.29    8.50
  14  -8  -2   37.20    8.30
  14  -8   2   41.90    6.00
  -8 -14   2   35.60    7.90
   8  14   2   43.80    7.80
  14  -9  -2    6.90    6.50
  14  -9   2    9.80    4.10
   9  14   2    4.50    4.60
  -9 -14   2    6.70    5.60
  14 -10  -2   11.90    7.00
  10  14   2    9.20    5.40
  14 -10   2   15.30    4.90
  14 -11  -2   21.50    8.20
  11  14   2   28.60    6.90
  14 -11   2   24.30    5.90
  14 -12  -2   72.09   12.00
  14 -12   2   63.59    9.40
  12  14   2   81.89    9.70
  14 -13  -2   45.20   10.50
  13  14   2   51.39    8.40
  14 -14  -2    9.30    8.30
  14  14   2   12.60    6.00
  14 -15  -2   -4.30    7.80
  15  14   2    0.70    5.20
  13 -15  -2   24.80    9.80
  15  13   2   28.80    6.70
  12 -15  -2   27.30    9.80
  15  12   2   29.10    6.90
  11 -15  -2   37.10   10.00
  15  11  -2   21.30    6.20
  15  11   2   32.80    6.80
  10 -15  -2   13.10    8.00
  15  10  -2   -0.10    4.40
  15  10   2    7.50    4.90
   9 -15  -2    5.00    7.40
  15   9  -2    2.30    4.90
  15   9   2   10.00    5.10
  15   8  -2  101.79   10.40
   8 -15  -2  111.49   13.60
  15   8   2  116.39   11.00
   7 -15  -2   22.50    8.00
  15   7  -2   25.30    5.90
  15   7   2   43.00    6.40
   6 -15  -2   66.29   10.60
  15   6  -2   75.69    9.30
  15   6   2   72.79    8.80
  15   5  -2    7.00    4.40
   5 -15  -2  -10.80    5.90
  15   5   2   -5.40    3.30
  -5  15   2   -1.40    3.90
   4 -15  -2  -10.50    5.50
  15   4  -2   -6.80    3.80
  15   4   2    4.20    3.50
  -4  15   2   -1.30    4.20
  15   3  -2   -4.10    3.90
   3 -15  -2  -12.30    5.10
  15   3   2   -0.80    3.10
 -15  -3   2   -2.20    4.10
  -3  15   2   -0.80    4.50
   2 -15  -2   53.99   10.20
  15   2  -2   61.39    8.10
   2 -15   2   56.59    8.90
  -2  15   2   73.09   10.40
 -15  -2   2   60.49    8.90
  15   2   2   66.19    7.40
   1 -15  -2   43.60    9.30
  15   1  -2   41.40    7.00
  -1  15   2   38.70    7.30
 -15  -1   2   41.30    7.50
  15   1   2   37.00    5.70
   1 -15   2   42.20    7.60
  15   0  -2    4.10    4.40
   0 -15  -2   -1.80    6.90
  15   0   2    4.90    3.40
   0 -15   2    1.20    5.60
 -15   0   2    6.30    4.40
  15  -1  -2   33.60    6.60
 -15   1   2   33.30    7.40
  -1 -15   2   42.00    8.60
  15  -1   2   35.60    5.30
  15  -2  -2    8.50    5.10
  -2 -15  -2   -2.30    6.80
  -2 -15   2   22.60    8.70
  15  -2   2    6.60    3.50
  15  -3  -2   90.59   11.00
  -3 -15  -2  119.39   14.30
  15  -3   2   92.69    8.40
  -3 -15   2  104.79   13.40
  15  -4  -2   25.20    6.70
  -4 -15  -2   19.70    8.90
  15  -4   2   24.80    4.70
  -4 -15   2   25.90    8.40
  15  -5  -2  417.86   24.90
  -5 -15   2  401.56   25.80
  15  -5   2  407.86   22.00
  15  -6  -2   30.70    7.30
  15  -6   2   26.90    5.30
   6  15   2   31.90    6.80
  -6 -15   2   23.60    6.50
  15  -7  -2   32.10    7.90
  15  -7   2   22.40    5.20
  -7 -15   2   28.80    7.10
   7  15   2   20.40    6.70
  15  -8  -2    1.10    6.10
  15  -8   2    7.40    4.10
  -8 -15   2    3.80    5.20
   8  15   2   -2.80    4.50
  15  -9  -2   85.99   12.00
   9  15   2   84.59   10.70
  15  -9   2  102.09    9.90
  15 -10  -2   53.59   10.60
  10  15   2   49.20    8.60
  15 -10   2   48.40    7.30
  15 -11  -2   16.50    8.50
  11  15   2   20.90    6.60
  15 -11   2   25.90    6.30
  12  15   2   10.60    6.00
  15 -13  -2   -0.50    7.30
  13  15   2   -2.60    5.10
  15 -14  -2   14.80    9.10
  14  15   2   21.20    6.80
  15 -15  -2    0.60    8.60
  15  15   2   -7.80    4.80
  15 -16  -2   21.50   10.40
  16  15   2   25.50    7.00
  14 -16  -2    4.20    8.70
  16  14   2    4.80    5.30
  13 -16  -2   -2.50    8.30
  16  13   2   -3.10    4.80
  12 -16  -2    4.70    8.20
  16  12   2    1.80    4.60
  16  11  -2   30.80    6.70
  11 -16  -2   30.90   10.10
  16  11   2   32.90    6.70
  10 -16  -2    3.20    7.20
  16  10  -2    6.90    5.10
  16  10   2    2.70    4.50
  16   9  -2   39.50    6.90
   9 -16  -2   24.80    8.70
  16   9   2   33.60    6.50
   8 -16  -2    6.40    7.70
  16   8  -2   15.70    5.50
  16   8   2   17.60    5.40
  16   7  -2   -0.40    4.60
   7 -16  -2    2.70    7.10
  16   7   2   19.80    5.30
   6 -16  -2    5.90    6.70
  16   6  -2   -0.10    4.40
  16   6   2    2.50    3.90
   5 -16  -2   -0.10    6.70
  16   5  -2   14.60    5.40
  16   5   2   12.00    4.50
  16   4  -2   12.30    5.20
   4 -16  -2    8.30    7.50
  16   4   2   15.00    4.60
   3 -16  -2   -1.10    6.20
  16   3  -2   -3.60    4.40
  -3  16   2   -2.30    7.30
  16   3   2    0.60    3.70
   2 -16  -2  -11.50    5.80
  16   2  -2   -2.80    4.20
   2 -16   2   -1.90    3.90
  -2  16   2    2.30    5.40
  16   2   2   -0.30    3.50
  16   1  -2   28.40    6.50
   1 -16  -2   32.40    8.80
   1 -16   2   22.50    6.10
  16   1   2   33.70    5.50
  -1  16   2   28.20    6.90
   0 -16  -2   70.79   11.70
  16   0  -2   68.89    9.10
   0 -16   2   80.79   11.80
  16   0   2   72.49    8.00
  -1 -16  -2   70.19   11.30
  16  -1  -2   63.49    9.00
  -1 -16   2   95.29   12.50
  16  -1   2   64.99    7.90
  16  -2  -2   70.59    9.40
  -2 -16  -2   72.09   11.60
  16  -2   2   76.29    8.10
  -2 -16   2  113.79   15.90
  -3 -16  -2   51.89   10.50
  16  -3  -2   45.90    8.30
  16  -3   2   37.50    6.00
  -3 -16   2   42.80    9.30
  -4 -16  -2    6.60    7.90
  16  -4  -2   -4.80    5.20
  16  -4   2   15.30    4.60
  -4 -16   2    1.00    6.10
  16  -5  -2   -2.10    6.00
  -5 -16   2    2.00    4.90
   5  16   2    8.00    5.10
  16  -5   2   -2.30    3.80
  16  -6  -2   15.10    6.60
  16  -6   2   11.20    4.70
   6  16   2   19.60    5.60
  -6 -16   2   12.40    6.10
  16  -7  -2   95.89   12.30
  -7 -16   2  131.09   14.30
   7  16   2   95.99   11.20
  16  -7   2   84.59    9.80
  16  -8  -2   21.40    8.00
  16  -8   2   21.60    5.60
   8  16   2   26.10    6.30
  16  -9  -2   58.99   10.80
   9  16   2   48.50    7.90
  16  -9   2   41.80    6.90
  16 -10  -2   22.80    8.70
  10  16   2   26.30    7.30
  16 -10   2   27.40    6.50
  16 -11  -2   -2.70    7.80
  16 -11   2   11.80    6.00
  11  16   2   11.70    6.10
  16 -12  -2   10.40    8.30
  12  16   2    5.40    6.00
  16 -13  -2    1.20    8.40
  13  16   2   12.70    6.70
  16 -14  -2   -1.70    8.10
  14  16   2   -4.40    5.20
  16 -15  -2   -9.30    8.00
  15  16   2   -8.80    5.00
  14 -17  -2   43.60   11.70
  13 -17  -2   31.00   11.20
  17  13   2   24.50    6.70
  12 -17  -2    8.00    8.90
  17  12   2    2.50    4.90
  17  11  -2   17.40    5.80
  11 -17  -2   16.60    9.00
  17  11   2   10.20    5.30
  17  10  -2    0.00    4.90
  10 -17  -2    9.30    8.00
  17  10   2    0.40    4.60
  17   9  -2   32.40    7.10
   9 -17  -2   33.20   10.10
  17   9   2   29.30    6.60
  17   8  -2   11.00    5.80
   8 -17  -2   20.50    8.00
  17   8   2   18.70    5.60
   7 -17  -2  155.88   17.10
  17   7  -2  168.38   14.20
  17   7   2  182.48   13.70
   6 -17  -2   -4.70    7.20
  17   6  -2    6.40    5.00
  17   6   2    0.30    4.30
   5 -17  -2    8.00    7.40
  17   5  -2    1.60    4.80
  17   5   2    3.10    4.20
   4 -17  -2   -2.20    6.80
  17   4  -2    7.80    5.30
  17   4   2   10.20    4.40
   3 -17  -2   70.69   11.60
  17   3  -2   55.19    8.30
  17   3   2   50.89    7.10
   3 -17   2   55.39    8.90
   2 -17  -2    8.50    7.80
  17   2  -2   22.40    6.50
  17   2   2   23.80    5.20
   2 -17   2   16.10    6.50
  17   1  -2    3.60    5.20
   1 -17  -2    4.20    7.70
  17   1   2   -1.70    3.70
   1 -17   2    1.30    4.20
   0 -17  -2   14.40    8.90
  17   0  -2   31.00    7.00
  17   0   2   26.40    5.40
   0 -17   2   35.00    9.40
  17  -1  -2    5.30    5.50
  17  -1   2    5.60    4.00
  -1 -17   2    7.70    7.70
  -2 -17  -2   24.80    8.70
  17  -2  -2   15.00    7.00
  -2 -17   2   36.90    9.70
  17  -2   2   19.00    5.10
  -3 -17  -2    3.30    8.70
  17  -3  -2    8.00    6.20
  -3 -17   2    9.80    7.60
  17  -3   2    9.50    4.60
  -4 -17  -2   81.99   13.20
  17  -4  -2   91.49   11.70
  -4 -17   2  110.29   15.00
  17  -4   2   88.29    9.50
  17  -5  -2   25.30    8.00
   5  17   2   33.80    7.00
  -5 -17   2   22.00    7.10
  17  -5   2   24.50    5.70
  17  -6  -2    6.50    6.90
   6  17   2    5.90    5.80
  17  -6   2    9.30    4.70
  -6 -17   2    6.20    6.00
  17  -7  -2   20.70    7.50
   7  17   2   21.80    6.30
  17  -8  -2    4.10    7.00
   8  17   2    3.90    5.00
  17  -8   2   16.60    5.40
  17  -9  -2   80.39   12.80
  17  -9   2   85.79   10.90
   9  17   2   97.79   11.30
  17 -10  -2   -1.80    7.30
  10  17   2   -5.40    5.50
  17 -10   2   -3.00    4.80
  17 -11  -2    7.20    8.50
  11  17   2   10.20    6.20
  17 -11   2   10.20    6.20
  17 -12  -2    0.40    8.20
  12  17   2   -1.80    7.00
  17 -13  -2    6.60    8.60
  17 -14  -2    8.10    9.10
  18  13   2    0.70    5.30
  18  12   2    4.00    5.10
  18  11  -2   31.40    7.70
  18  11   2   37.20    7.20
  18  10  -2   19.60    6.40
  18  10   2   29.90    6.70
  18   9  -2   14.90    6.10
  18   9   2   20.30    6.00
  18   8  -2   17.80    6.20
  18   8   2   -2.50    4.30
  18   7  -2    1.30    5.40
  18   7   2    1.20    4.70
  18   6  -2   13.00    6.00
  18   6   2   18.80    5.60
  18   5  -2   89.29   11.40
  18   5   2   87.99   10.40
  18   4  -2   20.40    6.40
   4 -18  -2   16.70   12.30
  18   4   2   15.60    5.40
  18   3  -2   35.20    7.40
  18   3   2   34.40    6.20
  18   2  -2   -3.50    5.20
  18   2   2   -2.40    4.00
  18   1  -2    5.90    6.20
   1 -18   2   15.20    9.00
  18   1   2   19.60    5.30
  18   0  -2   -5.80    5.30
  18   0   2   -0.20    3.90
   0 -18   2   -0.80    6.60
  -1 -18  -2   15.50   11.70
  18  -1  -2   10.40    6.70
  18  -1   2   17.40    5.00
  -1 -18   2   18.30    9.50
  18  -2  -2   21.40    7.40
  -2 -18  -2    7.30   14.80
  -2 -18   2   47.10   11.70
  18  -2   2   20.10    5.50
  -3 -18  -2   13.20   14.80
  18  -3  -2    6.00    6.80
  18  -3   2    6.40    4.70
  -3 -18   2   11.60    7.60
  18  -4  -2   -6.20    6.80
  18  -4   2   -3.70    4.20
  -4 -18   2    7.60    6.80
  18  -5  -2   -0.30    6.70
  18  -5   2   -5.80    4.40
  18  -6  -2   43.30    9.70
  18  -6   2   43.80    7.40
  18  -7  -2    4.60    7.10
  18  -7   2   11.50    5.60
  18  -8  -2    9.00    8.20
  18  -8   2   17.80    6.00
  18  -9  -2   -2.60    7.10
  18  -9   2   -1.00    5.00
  18 -10  -2   -3.00    7.40
  18 -10   2    9.00    6.00
  18 -11  -2   41.90   11.20
  18 -11   2   49.70    9.20
  18 -12  -2   15.10    9.70
  18 -13  -2   33.20   11.20
  19  12   2   12.00    6.00
  19  11   2   -3.90    4.80
  19  10  -2    4.00    6.10
  19  10   2    2.40    5.20
  19   9  -2    6.80    6.10
  19   9   2    3.80    5.30
  19   8  -2   38.40    8.00
  19   8   2   36.70    7.20
  19   7  -2   18.20    6.60
  19   7   2   21.90    6.30
  19   6  -2    8.30    6.00
  19   6   2    4.10    5.00
  19   5  -2    6.10    5.80
  19   5   2    0.00    4.80
  19   4  -2    0.60    5.70
  19   4   2    2.90    4.70
  19   3  -2   64.19   10.00
  19   3   2   65.19    8.50
  19   2  -2    2.80    5.90
  19   2   2    0.60    4.40
  19   1  -2   37.20    8.60
  19   1   2   47.30    7.30
  19   0  -2    1.50    5.70
  19   0   2    2.50    4.40
  19  -1  -2   16.70    7.40
  19  -1   2   31.20    6.50
  19  -2  -2   13.90    7.50
  19  -2   2    6.50    4.90
  19  -3  -2   82.69   11.90
  19  -3   2   65.19    8.50
  19  -4  -2   42.70    9.70
  19  -4   2   42.70    7.40
  19  -5  -2   15.10    7.90
  19  -5   2   12.10    5.70
  19  -6  -2   -6.70    6.70
  19  -6   2   -1.10    5.00
  19  -7  -2    1.40    7.40
  19  -7   2   -0.20    5.30
  19  -8  -2   17.40    9.10
  19  -8   2   17.10    6.40
  19  -9  -2  -10.00    7.20
  19  -9   2    7.50    5.80
  19 -10  -2    8.30    8.50
  19 -10   2   13.30    6.50
  19 -11  -2   10.80    9.20
  19 -11   2   12.40    7.00
  19 -12  -2   -1.60    7.90
  20  10  -2   25.70    7.70
  20  10   2   36.10    7.50
  20   9  -2    6.20    6.40
  20   9   2   -1.60    4.90
  20   8  -2    0.10    6.30
  20   8   2   -0.10    5.20
  20   7  -2   13.10    7.00
  20   7   2   10.40    5.70
  20   6  -2   14.70    7.10
  20   6   2   22.20    6.40
  20   5  -2   13.30    6.80
  20   5   2    9.00    5.70
  20   4  -2   17.70    7.30
  20   4   2   21.30    6.20
  20   3  -2    2.10    6.50
  20   3   2    1.70    4.90
  20   2  -2    2.90    6.30
  20   2   2   10.30    5.40
  20   1  -2   62.69   10.50
  20   1   2   60.49    8.50
  20   0  -2   43.30    9.20
  20   0   2   28.70    6.70
  20  -1  -2   62.39   11.00
  20  -1   2   59.49    8.50
  20  -2  -2    8.80    7.10
  20  -2   2    0.20    4.80
  20  -3  -2   -0.40    7.00
  20  -3   2    2.30    5.10
  20  -4  -2    4.00    7.50
  20  -4   2    4.40    5.60
  20  -5  -2   18.80    9.00
  20  -5   2   12.20    6.40
  20  -6  -2   -7.10    7.00
  20  -6   2    0.90    5.70
  20  -7  -2   17.80    9.20
  20  -7   2   10.10    6.40
  20  -8  -2   -7.30    7.40
  20  -8   2    4.80    5.80
  20  -9  -2   -4.00    8.10
  20  -9   2    0.90    6.10
  20 -10  -2   21.30    9.60
  20 -10   2   15.30    7.40
  21   8  -2   23.00    7.70
  21   8   2   28.20    7.20
  21   7  -2    1.30    6.60
  21   7   2    7.10    5.80
  21   6  -2   -0.40    6.40
  21   6   2    3.10    5.50
  21   5  -2   -0.10    6.40
  21   5   2    1.10    5.20
  21   4  -2    4.50    7.20
  21   4   2   17.30    6.20
  21   3  -2   -1.20    6.60
  21   3   2    8.20    5.80
  21   2  -2   20.50    8.20
  21   2   2   24.50    6.90
  21   1  -2   12.20    7.80
  21   1   2   11.30    6.00
  21   0  -2    4.70    7.30
  21   0   2    0.00    5.80
  21  -1  -2   17.00    8.50
  21  -1   2   19.20    6.80
  21  -2  -2   14.90    8.30
  21  -2   2   19.20    7.00
  21  -3  -2   34.30   10.00
  21  -3   2   33.50    7.60
  21  -4  -2    0.10    7.80
  21  -4   2    4.10    5.80
  21  -5  -2   -2.00    7.90
  21  -5   2    2.70    5.80
  21  -6  -2    8.50    8.90
  21  -6   2    4.00    5.70
  21  -7  -2   24.70   10.30
  21  -7   2   17.00    7.00
  21  -8  -2   -5.90    7.70
  21  -8   2    8.00    6.40
  22   4  -2   30.00    8.80
  22   4   2   -1.50    5.90
  22   3  -2    3.70    7.40
  22   3   2    7.30    6.00
  22   2  -2    5.70    7.80
  22   2   2    7.00    6.10
  22   1  -2    1.30    7.10
  22   1   2    6.90    6.10
  22   0  -2   41.90   10.80
  22   0   2   33.00    8.10
  22  -1  -2    5.00    8.30
  22  -1   2   11.60    6.50
  22  -2  -2   -4.20    7.50
  22  -2   2    2.50    5.80
  22  -3  -2    3.10    8.00
  22  -3   2    2.70    6.10
  22  -4  -2    4.00    9.00
  22  -4   2   18.80    7.00
   0   0  -3   -1.70    3.60
   1   0  -3  491.75   24.50
  -1   0  -3  452.55   24.90
   1  -2  -3  293.37   17.90
  -1   2  -3  309.07   17.70
   2   1  -3  295.67   17.20
  -2  -1  -3  367.26   19.30
  -1   2   3  316.17   15.50
  -2  -1   3  320.37   15.80
  -2   0  -3    4.10    4.30
   0   2  -3   -2.00    3.50
  -2   0   3    5.90    1.70
   1   2  -3  118.09    8.70
  -1  -2  -3  128.79   11.30
  -2   1  -3   89.19    9.70
  -2   1   3  107.59    6.60
   2  -2  -3  998.40   45.80
   2  -2  -3 1009.30   47.80
  -2  -2  -3  980.70   48.20
   2   2  -3  989.40   46.70
  -2   2  -3  946.71   47.30
  -2   2   3 1023.10   45.70
  -2  -2   3  960.20   45.80
  -2   3  -3  402.16   20.70
   3   2  -3  362.66   19.90
   3   2  -3  410.46   19.50
  -3  -2  -3  401.16   22.40
   2  -3  -3  380.66   21.40
   2  -3  -3  382.26   19.30
  -2   3   3  383.96   19.10
  -3  -2   3  375.96   19.40
  -3  -1  -3  194.58   14.70
   0  -3  -3  329.97   19.80
   3   0  -3  380.56   17.50
   3   0  -3  336.17   18.50
   0   3   3  331.27   16.70
  -3   0   3  327.67   17.10
   3  -1  -3    3.40    2.10
   1   3  -3    7.70    3.40
   3  -1  -3    8.20    3.80
  -3   1  -3    5.60    4.70
  -1  -3  -3    8.80    5.10
  -1  -3   3    8.40    2.10
   2   3  -3   28.70    4.00
  -2  -3  -3   17.30    5.50
  -3   2   3   21.80    3.10
  -2  -3   3   16.40    3.10
  -3   3  -3    5.10    4.70
  -3  -3  -3   27.90    6.20
   3  -3  -3   21.30    4.90
   3   3  -3   23.10    3.60
  -3   3   3   38.10    4.20
   4   3  -3   91.19    7.30
  -4  -3  -3  103.39   11.20
   4   3  -3  107.29    8.00
  -4  -3   3   92.09    7.40
   4   2  -3 1762.82   80.29
  -4  -2  -3 1697.23   82.29
  -2   4  -3 1765.52   80.39
   2  -4  -3 1678.03   81.69
   2  -4  -3 1733.63   79.79
   4   2  -3 1666.93   80.29
  -2   4   3 1727.13   79.69
  -4  -2   3 1898.41   80.59
   1  -4  -3   72.89    9.60
   1  -4  -3   87.59    6.10
  -1   4  -3   62.79    8.00
   4   1  -3   84.99    6.70
  -4  -1   3   85.29    6.50
  -1   4   3   77.59    5.90
   0  -4  -3  105.49    6.20
   0  -4  -3   71.79    9.40
   0   4  -3   71.49    7.70
   4   0  -3  118.19    7.30
   0   4   3   85.79    6.50
   4  -1  -3   19.90    3.50
  -1  -4  -3   24.00    6.90
  -4   1  -3   34.80    6.30
   4  -1  -3   27.50    4.70
  -4   1   3   19.00    3.10
   2   4  -3 1602.14   75.59
   4  -2  -3 1627.44   77.19
  -2  -4  -3 1655.53   78.69
   2   4  -3 1640.54   75.99
   4  -2  -3 1652.83   76.29
  -2  -4   3 1705.43   76.29
  -4   2   3 1694.63   76.09
   2   4   3 1656.63   75.69
   4  -3  -3   80.89    7.00
  -3  -4  -3   81.79    9.70
   3   4  -3  102.49    7.30
   4  -3  -3   77.89    8.30
   4  -3   3   78.19    6.30
  -3  -4   3  112.09    7.40
   4   4  -3  203.58   12.20
  -4  -4  -3  218.58   15.40
   4  -4  -3  218.48   12.30
   4   4  -3  191.18   12.00
   4  -4  -3  201.38   13.70
  -4   4   3  216.48   11.80
   4  -4   3  214.88   11.20
  -4  -4   3  198.68   12.50
  -5  -4  -3    3.20    5.00
   5   4  -3    1.30    2.20
   5   4  -3    1.60    2.90
   4  -5  -3    3.90    2.40
   4  -5  -3   -2.50    4.30
   4  -5   3    5.00    1.90
   5   4   3    4.10    1.90
  -5  -4   3    3.20    2.50
  -4   5   3    3.10    2.20
   3  -5  -3    8.50    4.70
   3  -5  -3    3.30    2.20
  -5  -3  -3   -5.10    5.10
   5   3  -3    7.40    2.60
   3  -5   3    3.10    1.80
  -5  -3   3    5.20    2.60
  -3   5   3    2.50    1.90
   5   3   3    4.70    2.00
   2  -5  -3   49.10    7.40
   2  -5  -3   71.89    5.60
  -5  -2  -3   50.89    8.70
   5   2  -3   57.69    6.00
   5   2  -3   62.79    7.00
  -5  -2   3   67.59    6.30
   2  -5   3   52.59    4.50
  -2   5   3   61.69    5.30
  -1   5  -3    3.40    3.40
   5   1  -3   11.60    2.80
  -5  -1  -3   22.60    6.10
   1  -5  -3   20.60    5.20
   5   1  -3    9.60    3.80
   1  -5   3    9.50    2.70
  -1   5   3   12.90    2.50
  -5  -1   3   10.00    2.90
   5   0  -3   49.00    6.10
   0  -5  -3   73.89    5.10
   5   0  -3   56.79    6.80
   0   5  -3   84.19    6.80
  -5   0   3   47.70    5.60
   0  -5   3   78.49    6.20
   1   5  -3   -2.60    3.00
  -1  -5  -3    6.70    2.40
   5  -1  -3    4.50    2.70
  -1  -5  -3    4.10    1.70
  -1  -5  -3   -5.30    5.50
   5  -1   3    8.50    2.70
  -5   1   3    1.90    2.20
  -1  -5   3   -0.20    2.30
   1   5   3    3.90    2.30
   2   5  -3   49.99    5.40
  -2  -5  -3   53.39    5.00
   5  -2  -3   50.69    5.30
   5  -2  -3   60.39    7.00
  -2  -5  -3   64.79    4.50
  -2  -5  -3   60.49    8.50
   5  -2   3   61.29    5.50
   2   5   3   53.99    5.50
  -5   2   3   48.60    5.10
  -2  -5   3   40.50    5.50
   5  -3  -3    1.10    3.70
   3   5  -3    5.90    2.50
  -3  -5  -3    9.40    2.50
   3   5  -3    2.60    2.40
   5  -3  -3    2.20    2.30
  -3  -5  -3    8.70    1.90
  -3  -5  -3    8.50    4.70
  -3  -5   3    1.30    2.60
  -5   3   3    3.30    2.10
  -4  -5  -3  111.99    7.90
  -4  -5  -3  116.19    7.40
   5  -4  -3  112.09    8.60
  -4  -5  -3  109.89   12.00
   5  -4  -3  107.19   10.30
   4   5  -3  131.79    8.50
   4   5  -3  149.59    8.90
  -4  -5   3  139.09    9.20
  -5   4   3  114.49    8.10
   5  -4   3  111.39    7.40
  -5  -5  -3   10.00    2.90
   5  -5  -3    6.60    4.60
   5  -5  -3    5.50    3.30
  -5  -5  -3   10.30    6.30
   5   5  -3    8.70    3.60
  -5  -5   3    9.50    3.30
   5  -5   3   12.90    2.60
  -5   5   3   10.00    3.10
   6   5  -3    5.40    3.30
  -6  -5  -3    5.60    6.40
  -6  -5  -3    5.00    2.20
   5  -6  -3    4.90    5.00
  -6  -5   3    1.40    3.00
   5  -6   3    4.30    1.90
   5  -6   3    0.80    2.00
   6   5   3    3.80    2.40
  -5   6   3    3.00    2.50
   4  -6  -3  952.30   43.70
   4  -6  -3  860.21   44.30
  -6  -4  -3  888.01   45.50
   6   4  -3  844.82   42.40
   4  -6   3  887.31   41.40
  -4   6   3  944.81   42.60
   4  -6   3  876.51   40.80
   6   4   3  850.31   42.10
  -6  -4   3  883.21   43.20
  -6  -3  -3   96.59   12.50
   3  -6  -3   92.19    7.40
   6   3  -3  114.69    8.80
   6   3  -3   91.59    7.80
   3  -6  -3   97.09   10.80
  -3   6   3   92.29    7.10
   6   3   3   91.09    6.70
  -6  -3   3   96.29    8.10
   3  -6   3   94.69    5.60
   3  -6   3   90.89    6.40
   2  -6  -3   24.40    3.50
   6   2  -3   25.80    4.30
   6   2  -3   31.20    5.10
   2  -6  -3   16.70    5.60
   6   2   3   22.30    4.00
   2  -6   3   22.60    3.50
   2  -6   3   18.20    2.60
  -2   6   3   24.60    3.70
  -6  -2   3   24.00    4.20
   6   2   3   26.40    3.50
   1  -6  -3   15.80    3.00
   6   1  -3   22.60    4.20
   1  -6  -3    6.70    5.20
  -6  -1   3   16.00    3.30
   6   1   3   14.10    3.70
   1  -6   3   14.70    2.90
   1  -6   3   19.20    3.30
  -1   6   3   17.30    3.10
   0  -6  -3  273.37   18.50
   0  -6  -3  284.07   14.50
   6   0  -3  271.47   15.60
   6   0  -3  273.27   16.10
   0  -6   3  289.67   14.80
   0   6   3  278.97   15.10
   6   0   3  256.97   15.10
   0  -6   3  280.07   15.20
  -6   0   3  290.67   15.50
  -1  -6  -3  115.69   12.60
  -1  -6  -3  118.19    8.30
   6  -1  -3  122.79    9.10
   6  -1  -3  109.49    9.70
  -1  -6  -3  130.99    7.70
  -1  -6   3  119.19    8.50
   1   6   3  131.69    8.40
  -6   1   3  119.19    8.40
   6  -1   3  116.59    8.40
  -2  -6  -3    0.30    1.60
  -2  -6  -3   -1.30    5.00
   6  -2  -3    1.00    2.10
   6  -2  -3   -3.10    3.20
  -2  -6  -3    1.00    2.20
   6  -2   3    3.60    2.30
  -6   2   3   -1.00    1.80
   2   6   3    3.10    2.50
  -2  -6   3   10.30    2.80
   6  -3  -3   -1.60    2.10
  -3  -6  -3   -5.60    4.50
   6  -3  -3   -0.20    3.70
  -3  -6  -3    3.30    2.50
   3   6  -3   -1.50    2.10
   3   6  -3   -6.00    3.60
   6  -3   3    1.10    2.00
  -6   3   3    0.20    1.90
  -3  -6   3   -2.30    2.40
   6  -4  -3   38.40    6.60
   6  -4  -3   34.60    5.40
  -4  -6  -3   37.90    5.20
  -4  -6  -3   27.30    7.60
   4   6  -3   34.40    4.80
  -4  -6   3   54.89    6.30
  -6   4   3   33.80    4.70
   6  -5  -3    3.90    4.90
  -5  -6  -3    0.40    6.50
  -5  -6  -3   12.40    3.40
  -5  -6   3   12.60    3.80
  -6   5   3    5.80    2.70
   6  -5   3    6.50    2.20
  -6  -6  -3  523.95   31.10
   6   6  -3  539.05   26.60
   6  -6  -3  501.15   28.70
  -6  -6  -3  521.15   26.80
   6  -6   3  526.65   25.70
   6  -6   3  525.45   25.10
  -6  -6   3  551.94   28.20
  -6   6   3  545.15   27.10
   7   6  -3    5.30    3.40
  -7  -6  -3    1.30    2.60
   6  -7  -3    1.80    5.50
   6  -7   3    1.90    2.40
  -6   7   3    2.70    3.10
   7   6   3    1.60    3.50
  -7  -6   3    3.00    3.40
   7   6   3    3.70    2.70
   6  -7   3    1.50    1.80
  -7  -5  -3    6.30    2.70
   5  -7  -3   -1.20    5.50
   7   5  -3    4.50    3.60
  -5   7   3    5.60    3.10
   7   5   3    4.50    2.90
   5  -7   3    6.80    1.80
   5  -7   3    2.20    2.50
  -7  -5   3    8.20    3.80
   7   5   3   10.60    3.80
  -7  -4  -3  104.89    7.50
   4  -7  -3  127.69   12.80
   4  -7   3  111.69    6.10
  -7  -4   3  118.79    9.60
   4  -7   3  112.79    7.40
   7   4   3  106.89    8.10
   7   4   3  102.99    8.90
   3  -7  -3   44.80    7.40
   7   3   3   39.70    5.40
   3  -7   3   43.40    5.00
  -3   7   3   42.80    5.40
   7   3   3   42.40    5.00
   7   2  -3  130.99   10.40
   7   2  -3  147.19   11.30
   2  -7  -3  146.69   12.70
   7   2   3  150.98    9.10
  -7  -2   3  148.79   10.10
  -2   7   3  131.89    9.60
   2  -7   3  139.09    9.00
   7   2   3  136.29    9.90
   1  -7  -3   12.20    5.90
   7   1  -3    8.10    3.10
   7   1  -3    8.60    4.00
   7   1   3    8.20    3.30
  -7  -1   3   14.90    3.40
   1  -7   3   10.50    2.90
   1  -7   3    8.30    2.80
  -1   7   3    9.90    3.30
   7   1   3    4.70    2.40
   7   0  -3   73.79    7.30
   0  -7  -3   92.39   11.30
   7   0  -3   73.39    8.10
   0   7   3   74.69    7.00
  -7   0   3   75.79    6.80
   7   0   3   61.49    7.20
  -1  -7  -3   -6.00    5.50
  -1  -7  -3    1.40    2.90
   7  -1  -3   -0.50    2.70
   7  -1   3   10.30    2.90
   1   7   3    1.00    2.70
  -7   1   3   -0.90    2.10
  -1  -7   3    3.20    3.00
   7  -2  -3    5.80    4.20
   7  -2  -3   -0.60    2.30
  -2  -7  -3   -2.10    2.50
  -2  -7  -3   -9.20    4.90
  -2  -7   3    1.40    2.60
   7  -2   3    2.10    2.90
   2   7   3   -2.20    3.00
  -7   2   3    1.30    2.20
   7  -3  -3   11.30    4.50
  -3  -7  -3    6.60    3.40
  -3  -7  -3    6.90    5.80
   7  -3  -3    9.30    3.60
   3   7  -3    6.40    2.50
  -3  -7   3   10.40    3.60
   7  -3   3    4.80    2.60
  -7   3   3    9.50    2.90
   5   7  -3    0.80    3.20
  -5  -7  -3    1.60    2.90
   7  -5  -3   -8.50    5.70
  -5  -7  -3   -4.80    6.00
  -7   5   3   -3.70    2.40
   7  -5   3   -2.00    2.10
  -6  -7  -3    7.90    3.20
  -6  -7  -3   -0.40    7.00
   7  -6  -3    1.20    5.30
   6   7  -3   -7.00    3.90
   7  -6   3    2.50    2.10
  -7   6   3   -1.00    2.70
  -6  -7   3    3.00    3.50
   7  -6   3    0.90    2.30
  -7  -7  -3    3.70    3.00
   7   7  -3    3.40    3.30
   7  -7  -3   25.00    6.70
  -7  -7   3   -1.30    3.40
   7  -7   3   -3.10    2.50
   7   7   3    3.10    2.80
   7   7   3    4.70    3.90
   7  -7   3    3.90    2.10
   7  -8  -3   28.00    7.10
  -8  -7  -3   23.20    5.90
  -7   8  -3   20.70    4.20
   8   7  -3   24.40    4.80
   7  -8   3   25.80    3.10
   8   7   3   16.10    5.10
  -7   8   3   31.60    5.10
   7  -8   3   20.30    4.30
  -8  -7   3   40.10    6.20
   8   7   3   25.60    4.80
  -8  -6  -3  835.52   40.80
   8   6  -3  770.02   40.40
  -6   8  -3  789.22   39.90
   6  -8  -3  832.72   43.00
   6  -8   3  849.22   38.50
   6  -8   3  853.81   40.00
   8   6   3  862.91   41.20
  -6   8   3  868.41   41.20
  -8  -6   3  850.71   42.20
   8   6   3  842.02   41.10
   5  -8  -3  139.09   14.60
  -8  -5  -3  155.18   10.20
   8   5  -3  149.09   11.20
  -5   8   3  160.98   10.90
   5  -8   3  156.58   10.00
   8   5   3  155.88   10.70
   5  -8   3  160.28    8.20
  -8  -5   3  158.98   12.10
   8   5   3  154.38   11.30
  -8  -4  -3 1166.18   55.79
   4  -8  -3 1319.97   59.39
   8   4  -3 1164.08   56.59
   8   4   3 1131.49   56.19
  -8  -4   3 1220.38   57.89
   8   4   3 1157.48   56.49
   4  -8   3 1211.68   55.69
   4  -8   3 1160.48   53.89
  -4   8   3 1211.68   56.69
   8   3  -3    9.30    4.10
   3  -8  -3    5.30    5.60
   3  -8   3    5.60    3.20
  -3   8   3    3.70    3.20
   8   3   3   -0.50    3.00
   8   3   3    0.60    2.30
   8   2  -3    0.10    3.50
   2  -8  -3   -6.10    4.70
  -8  -2   3    0.30    2.80
   2  -8   3   -5.00    2.50
  -2   8   3    2.60    2.90
   8   2   3   -0.50    2.50
   8   2   3    4.70    3.30
   8   1  -3   37.50    6.20
   1  -8  -3   37.00    7.70
   8   1   3   31.20    4.40
   1  -8   3   31.10    5.00
  -8  -1   3   34.00    5.40
   8   1   3   32.10    4.50
  -1   8   3   38.70    5.40
   1  -8   3   39.90    5.50
   0  -8  -3 1871.41   82.39
   8   0  -3 1686.13   79.79
  -8   0   3 1667.53   79.59
   8   0   3 1616.94   78.59
   0  -8   3 1732.23   79.09
   8   0   3 1643.84   78.39
   0   8   3 1711.23   79.39
   0  -8   3 1699.33   78.89
   8  -1  -3   15.80    5.60
  -1  -8  -3   18.70    4.20
  -1  -8  -3    1.40    6.60
   8  -1   3   16.90    3.60
   8  -1   3   11.10    3.00
   1   8   3   11.30    4.10
  -8   1   3   17.30    4.10
  -2  -8  -3  237.08   14.40
  -2  -8  -3  236.58   17.70
   8  -2  -3  215.38   15.20
  -2  -8   3  228.38   14.50
  -8   2   3  246.08   14.40
   8  -2   3  247.78   13.30
   8  -2   3  242.48   13.20
   2   8   3  225.88   14.70
   8  -3  -3   -1.90    4.60
  -3  -8  -3    1.40    3.30
  -3  -8  -3   -2.70    5.90
  -8   3   3    0.30    2.60
   8  -3   3    6.10    2.70
  -3  -8   3   -0.10    2.80
   4   8  -3  293.67   16.50
  -4  -8  -3  334.17   22.50
  -4  -8  -3  329.67   18.60
  -4  -8   3  318.87   19.40
  -8   4   3  340.57   18.30
   8  -4   3  342.37   16.90
  -5  -8  -3   31.20    8.60
   5   8  -3   36.30    4.60
   8  -5  -3   28.50    6.30
  -5  -8  -3   26.90    4.90
  -8   5   3   20.30    4.30
  -5  -8   3   28.20    5.50
   8  -5   3   23.80    4.10
   8  -5   3   36.40    4.70
  -6  -8  -3   51.69    6.80
  -6  -8  -3   39.20   10.40
  -8   6  -3   35.20    4.90
   8  -6  -3   44.00    7.80
  -6  -8   3   40.80    6.80
  -8   6   3   40.10    5.50
   8  -6   3   36.80    5.00
   8  -6   3   47.30    4.90
   8  -7  -3   44.70    8.00
  -8   7  -3   40.10    5.10
   7   8  -3   38.90    5.40
  -8   7   3   44.20    6.20
   8  -7   3   38.10    5.20
   8  -7   3   51.29    4.80
  -7  -8   3   54.99    7.80
   8   8  -3   17.80    4.40
   8  -8   3   27.90    4.40
  -8   8   3   26.10    4.80
   8   8   3   23.50    5.20
   8   8   3   31.30    5.70
   8  -8   3   27.30    3.40
  -8  -8   3   32.10    5.90
   9   8  -3    1.00    3.20
   8  -9  -3    6.80    5.90
  -9  -8   3    2.50    3.80
   9   8   3    5.60    4.30
   8  -9   3    7.50    2.30
  -8   9   3    5.30    3.30
   9   7  -3    5.00    3.80
   7  -9  -3   27.90    7.50
  -7   9   3   17.60    4.60
   9   7   3   13.20    4.90
   7  -9   3   10.70    2.50
  -9  -7   3   18.70    5.30
   9   7   3   11.10    4.90
   7  -9   3    6.10    3.10
   6  -9  -3    4.30    6.60
  -6   9  -3   12.00    3.60
   9   6  -3   -5.80    4.00
   9   6   3    3.80    4.40
   9   6   3    7.60    3.80
  -9  -6   3   18.50    4.70
  -6   9   3    6.10    3.50
   6  -9   3    4.90    2.90
   5  -9  -3   22.80    6.70
  -9  -5  -3    4.50    2.60
   9   5  -3   10.50    4.40
   5  -9   3    6.50    2.90
   9   5   3   -2.90    3.60
  -5   9   3    4.30    3.10
   5  -9   3    0.80    1.70
  -9  -5   3   -0.30    3.70
   9   5   3    6.10    3.10
   4  -9  -3   24.40    6.80
   9   4  -3    8.30    4.50
  -9  -4  -3    8.70    2.70
  -9  -4   3   10.90    4.60
   9   4   3    4.50    3.60
   9   4   3    7.40    3.00
  -4   9   3   15.90    4.00
   4  -9   3    9.00    3.30
   3  -9  -3   26.50    7.30
   9   3  -3   21.70    5.10
   3  -9   3   15.20    4.20
   9   3   3   18.50    4.30
   9   3   3   22.00    4.20
  -3   9   3   19.40    5.00
  -9  -3   3   17.90    4.80
   2  -9  -3   18.60    6.60
   9   2  -3    9.10    4.30
   9   2   3    9.50    3.50
  -2   9   3    5.60    3.90
   2  -9   3    2.00    3.20
  -9  -2   3   12.70    4.00
   9   2   3    7.90    3.10
   1  -9  -3   22.50    7.90
   9   1  -3   28.40    5.70
  -9  -1   3   25.80    4.80
   9   1   3   18.20    4.00
  -1   9   3   25.60    5.00
   9   1   3   25.60    4.70
   1  -9   3   23.00    4.80
   1  -9   3   21.50    4.80
   9   0  -3    2.00    4.90
   0  -9  -3   26.30    8.40
   0  -9   3    7.70    3.90
   0  -9   3    5.40    4.10
   9   0   3   10.20    3.40
   0   9   3   14.60    4.10
  -9   0   3    8.80    3.70
   9   0   3    4.50    3.00
  -1  -9  -3   22.60    4.70
  -1  -9  -3   22.80    7.60
   9  -1  -3   -8.20    5.40
   1   9   3   19.20    4.90
   9  -1   3    9.20    3.10
  -9   1   3    9.50    3.70
   9  -1   3    2.00    3.40
  -2  -9  -3   73.09    8.00
  -2  -9  -3   65.19   10.90
   9  -2  -3   68.29    9.30
  -2  -9   3   80.59    9.20
   9  -2   3   71.79    6.70
   9  -2   3   71.69    6.90
   2   9   3   61.59    8.20
  -9   2   3   65.49    7.30
  -3  -9  -3   16.90    7.40
  -3  -9  -3   18.70    5.10
   9  -3  -3   12.40    5.70
  -3  -9   3   13.00    4.50
   9  -3   3   14.00    3.50
  -9   3   3   13.20    4.00
   9  -3   3   16.60    3.70
  -5  -9  -3    0.10    3.10
  -5  -9  -3    1.00    6.40
   9  -5  -3   -8.20    4.80
   6   9  -3   54.39    6.50
  -6  -9  -3   40.60   10.20
   9  -6  -3   31.10    7.50
  -9   6   3   28.80    5.20
   9  -6   3   34.10    5.20
   9  -6   3   39.10    4.80
  -6  -9   3   38.50    7.30
   9  -7  -3  -10.10    4.70
   7   9  -3    3.00    2.60
   9  -7   3    0.30    2.80
   9  -7   3   -0.50    2.10
  -7  -9   3    0.40    3.50
  -9   7   3   -3.50    2.60
   8   9  -3   57.39    6.40
   9  -8  -3   60.79    9.20
  -8  -9   3   46.70    7.60
  -9   8   3   51.59    7.10
   8   9   3   49.10    7.30
   9  -8   3   50.29    5.10
   9   9  -3   -3.20    2.50
   9  -9  -3   -1.70    5.50
   9  -9   3    0.10    2.00
  -9  -9   3   -2.50    3.50
   9   9   3   -3.20    3.60
  -9   9   3    1.10    3.00
   9 -10  -3   30.40    8.00
  10   9   3   10.70    4.70
   9 -10   3   18.50    3.40
 -10  -9   3   13.50    5.10
  -9  10   3   32.80    5.60
  10   8  -3   -6.70    3.20
   8 -10  -3  -11.20    5.40
   8 -10   3    0.40    2.30
  10   8   3    1.70    3.60
 -10  -8   3    0.80    3.60
  -8  10   3   -0.60    2.90
  10   7  -3    2.60    4.00
   7 -10  -3   21.00    7.30
   7 -10   3   14.90    2.70
  10   7   3    7.40    4.10
 -10  -7   3   13.60    4.80
  -7  10   3   16.00    4.40
   6 -10  -3   33.70    8.30
  10   6  -3   29.20    5.60
   6 -10   3   26.90    7.60
 -10  -6   3   30.80    6.20
  -6  10   3   34.70    5.80
   6 -10   3   32.80    4.30
  10   6   3   36.80    6.00
   5 -10  -3  147.29   15.20
  10   5  -3  111.29   11.10
 -10  -5   3  145.19   12.40
  10   5   3  142.49   10.70
   5 -10   3  138.29    9.80
  10   5   3  138.39   11.10
  -5  10   3  149.09   11.00
  10   4  -3   -5.00    3.90
 -10  -4  -3    3.90    3.20
   4 -10  -3   -0.50    6.20
  10   4   3    3.60    2.80
  -4  10   3    2.10    3.30
 -10  -4   3    2.60    3.70
  10   4   3    2.20    3.50
   4 -10   3   -0.60    2.50
   3 -10  -3   20.90    6.50
 -10  -3  -3    0.10    2.00
  -3  10   3   -0.90    2.90
  10   3   3    0.20    3.30
 -10  -3   3   -2.60    2.90
  10   3   3    0.00    2.60
   3 -10   3   -4.60    2.90
  10   2  -3   80.19    9.40
 -10  -2  -3   83.79    6.60
   2 -10  -3  128.59   13.30
   2 -10   3   59.89    8.10
 -10  -2   3   86.49    8.60
  10   2   3   77.59    7.70
  -2  10   3  102.99    9.50
  10   2   3   85.39    7.80
 -10  -1  -3  172.88   10.00
  10   1  -3  160.78   12.70
  10   1   3  180.18   11.50
   1 -10   3  145.09   12.10
 -10  -1   3  178.98   12.30
   1 -10   3  149.79   11.80
  10   1   3  163.78   11.10
  10   0  -3  133.19   12.80
 -10   0  -3  159.78    9.50
   0 -10  -3  186.48   17.10
 -10   0   3  174.18   11.90
  10   0   3  146.69   10.80
   0  10   3  162.78   12.50
  10   0   3  164.58   10.80
  -1 -10  -3   41.70    9.20
  -1 -10  -3   40.80    6.50
  10  -1  -3   37.50    7.20
  10  -1   3   42.00    5.60
  -1 -10   3   32.50    6.20
  10  -1   3   39.60    5.40
   1  10   3   36.10    6.80
 -10   1   3   32.00    5.30
  -1 -10   3   42.70    8.00
  -2 -10  -3   22.90    7.80
  10  -2  -3   11.70    5.80
  -2 -10  -3   12.60    4.50
 -10   2   3    9.80    3.80
  10  -2   3   10.60    3.40
  -2 -10   3   15.40    5.50
  10  -2   3   12.00    3.70
   2  10   3    9.00    4.50
  -2 -10   3   12.50    4.40
  -3 -10  -3   12.10    7.20
  10  -3  -3    1.50    5.30
  -3 -10  -3   13.80    5.00
  10  -3   3    5.70    3.20
  10  -3   3    4.90    3.00
 -10   3   3    3.10    3.20
  -3 -10   3    7.20    4.70
  10  -4  -3  575.94   31.40
  -4 -10  -3  588.44   33.50
  10  -4   3  578.04   29.10
  10  -4   3  571.94   28.00
 -10   4   3  600.64   29.90
  -4 -10   3  522.55   30.40
  -5 -10  -3   27.90    8.30
  10  -5  -3   10.60    6.30
 -10   5   3   11.70    4.00
  10  -5   3    4.20    3.40
  10  -5   3   14.80    3.20
  -5 -10   3    4.70    5.00
  10  -6  -3  801.22   43.80
  -6 -10  -3  976.30   47.10
 -10   6   3  856.61   42.80
  10  -6   3  859.41   42.00
  -6 -10   3  849.91   44.10
  10  -6   3  840.22   40.50
  10  -8  -3   80.79   10.60
   8  10   3   72.79    8.80
 -10   8   3   78.09    8.20
  10  -8   3   73.09    6.20
  -8 -10   3   75.59    9.80
   9  10  -3   -5.50    2.30
  10  -9  -3   -4.10    5.60
  -9 -10   3    2.20    3.80
  10  -9   3    0.40    2.30
 -10   9   3   -3.90    3.30
   9  10   3    0.50    4.20
  10 -10  -3   44.80    9.50
 -10  10   3   57.49    7.60
  10  10   3   59.99    8.10
  10 -10   3   72.29    6.30
 -10 -10   3   68.59    9.70
  10 -11  -3    3.30    6.50
  11  10  -3   -0.70    3.80
 -11 -10   3    3.10    4.00
 -10  11   3    4.90    3.50
  11  10   3    9.20    4.70
  11   9  -3   -6.00    3.80
   9 -11  -3   -6.70    6.20
 -11  -9   3    4.50    4.00
  -9  11   3    4.70    3.70
  11   9   3    6.90    4.50
  11   8  -3   -1.70    3.80
   8 -11  -3   22.00    7.70
 -11  -8   3    6.00    4.30
  -8  11   3    4.20    3.80
  11   8   3    7.60    4.40
  11   7  -3    1.90    4.60
   7 -11  -3    2.90    6.50
 -11  -7   3   11.30    5.20
  -7  11   3    8.30    4.20
  11   7   3   13.00    4.80
  11   6  -3    4.70    4.30
   6 -11  -3    7.80    6.20
  11   6   3    5.30    4.10
 -11  -6   3    1.20    3.90
  -6  11   3    5.00    3.60
   5 -11  -3   15.50    7.40
  11   5  -3   38.40    6.40
  11   5   3   13.10    4.90
 -11  -5   3   28.50    5.90
  -5  11   3   12.70    4.50
   4 -11  -3  -11.50    5.80
  11   4  -3   -4.30    4.40
  11   4   3    2.10    3.50
 -11  -4   3    5.90    3.80
  -4  11   3    6.10    3.90
  11   3  -3   -3.20    3.90
   3 -11  -3   -3.80    5.90
  11   3   3    0.30    2.70
   3 -11   3   -1.90    3.20
 -11  -3   3   -0.60    3.20
  11   3   3   -0.20    3.10
  -3  11   3    0.70    3.40
  11   2  -3    0.50    4.90
   2 -11  -3    1.50    6.50
   2 -11   3    7.40    3.60
  11   2   3    4.60    3.30
   2 -11   3    4.30    3.60
 -11  -2   3    1.60    3.40
  11   2   3    5.20    3.60
  -2  11   3    5.50    4.00
   1 -11  -3    1.20    7.20
  11   1  -3  -11.50    4.20
  11   1   3   -0.90    2.60
 -11  -1   3    0.70    3.00
   1 -11   3   -3.10    3.30
  -1  11   3   -3.50    3.50
   1 -11   3   -3.60    3.20
  11   1   3    0.40    3.30
  11   0  -3   24.20    6.10
   0 -11  -3   46.00    9.30
 -11   0  -3   25.10    4.40
   0 -11   3   35.40    6.40
   0 -11   3   29.70    5.40
 -11   0   3   20.20    4.90
  11   0   3   29.50    4.90
  11   0   3   24.60    4.70
   0  11   3   33.00    6.30
  -1 -11  -3   25.90    8.40
 -11   1  -3   25.70    4.50
  11  -1  -3   19.20    6.10
 -11   1   3   25.00    5.50
  11  -1   3   21.10    4.70
  -1 -11   3   20.50    5.20
  -1 -11   3   33.50    7.80
   1  11   3   30.40    6.10
  11  -1   3   22.50    4.40
  11  -2  -3   14.80    6.70
  -2 -11  -3   25.50    8.40
  -2 -11   3   33.40    6.70
  11  -2   3   18.60    4.20
  11  -2   3   21.00    4.50
 -11   2   3   14.70    4.80
  -2 -11   3   37.70    7.70
  11  -3  -3   11.40    6.60
  -3 -11  -3   14.70    7.80
  11  -3   3   19.20    4.00
 -11   3   3   16.90    4.50
  11  -3   3   20.00    4.40
  -3 -11   3   22.50    6.30
  11  -4  -3   -4.00    5.50
  -4 -11  -3    9.00    7.80
  11  -4   3   -0.80    2.60
 -11   4   3   -1.50    2.90
  11  -4   3   -0.40    2.90
  -4 -11   3   -2.20    3.40
  11  -5  -3    4.20    5.30
  -5 -11   3    6.20    4.50
 -11   5   3    1.60    3.40
  11  -5   3    2.10    2.80
  -6 -11  -3   33.60    9.60
  11  -6  -3   26.70    7.70
 -11   6   3   24.90    5.10
  -6 -11   3   25.30    6.20
  11  -6   3   29.60    4.20
  11  -7  -3    8.60    6.00
  11  -7   3   17.20    3.50
 -11   7   3   10.30    4.40
  -7 -11   3   18.60    6.20
  11  -8  -3   44.80    8.50
   8  11   3   36.50    6.70
 -11   8   3   38.30    6.50
  -8 -11   3   35.90    7.40
  11  -8   3   34.80    4.50
  11  -9  -3    5.30    6.30
   9  11   3    2.70    4.80
 -11   9   3    0.60    3.20
  11  -9   3    0.80    2.80
  -9 -11   3    2.80    4.10
  11 -10  -3    4.80    6.50
 -10 -11   3    3.30    4.40
 -11  10   3    0.00    3.40
  11 -10   3    2.70    2.90
  10  11   3    0.00    4.30
  11 -11  -3    5.20    7.00
 -11 -11   3    1.10    4.10
  11  11   3    9.90    5.20
 -11  11   3   -1.40    3.50
  11 -12  -3    4.70    7.60
 -12 -11   3   13.60    5.50
  12  11   3    5.00    5.80
  10 -12  -3  152.38   16.20
 -12 -10   3  105.79   12.20
  12  10   3  113.19   11.90
 -10  12   3  109.49   10.90
  12   9  -3   11.20    5.10
   9 -12  -3    9.30    7.90
 -12  -9   3   24.60    6.50
  -9  12   3   19.30    5.20
  12   9   3   31.90    6.10
  12   8  -3   99.39   10.70
   8 -12  -3   95.09   13.10
  12   8   3  117.19   10.40
  -8  12   3  114.89   10.30
 -12  -8   3   81.89   11.20
   7 -12  -3   14.00    7.60
  12   7  -3   17.50    5.40
  -7  12   3   14.40    4.70
 -12  -7   3   23.40    6.50
  12   7   3   15.80    5.00
  12   6  -3  503.75   29.30
   6 -12  -3  550.94   32.30
  12   6   3  560.84   29.10
 -12  -6   3  593.74   31.60
  -6  12   3  558.34   30.00
  12   5  -3   22.50    6.10
   5 -12  -3   19.30    7.60
 -12  -5   3   23.60    5.70
  -5  12   3   31.60    6.30
  12   5   3   36.80    5.80
   4 -12  -3  166.08   15.90
  12   4  -3  179.18   13.90
  12   4   3  179.38   12.70
  -4  12   3  186.78   13.60
 -12  -4   3  194.38   14.10
  12   3  -3   -5.00    4.10
   3 -12  -3   -2.10    6.20
  -3  12   3    3.00    3.50
 -12  -3   3    3.60    3.60
  12   2  -3   10.80    5.30
   2 -12  -3    9.50    7.20
  -2  12   3   20.00    5.60
   2 -12   3   25.50    5.20
  12   2   3   17.30    4.40
 -12  -2   3   13.20    4.50
   1 -12  -3   51.09   10.10
  12   1  -3   58.89    8.40
   1 -12   3   59.39    7.70
 -12  -1   3   57.29    7.80
  12   1   3   52.59    7.10
  -1  12   3   64.09    8.60
  12   0  -3  193.28   14.90
   0 -12  -3  232.08   18.40
   0  12   3  203.88   15.20
  12   0   3  211.18   13.00
   0 -12   3  210.88   14.90
 -12   0   3  200.88   14.40
  -1 -12  -3    2.50    6.90
  12  -1  -3    2.60    5.00
 -12   1   3    4.50    3.80
   1  12   3   10.80    4.80
  -1 -12   3   21.10    6.50
  12  -1   3   17.70    3.80
  -2 -12  -3    5.60    7.80
  12  -2  -3   11.40    5.70
 -12   2   3   11.40    4.50
  12  -2   3   13.40    3.80
  -2 -12   3   23.00    6.10
  -3 -12  -3   34.00    9.90
  12  -3  -3   37.10    8.00
  12  -3   3   38.50    5.00
  -3 -12   3   47.00    7.50
 -12   3   3   36.00    5.80
  12  -4  -3   14.40    6.30
  -4 -12  -3    8.10    8.60
  -4 -12   3   14.80    5.20
  12  -4   3   15.20    3.70
 -12   4   3   16.00    4.80
  -5 -12  -3   68.39   12.40
  12  -5  -3   96.69   12.30
  -5 -12   3   57.29    8.80
 -12   5   3   59.29    7.60
  12  -5   3   64.39    6.60
  12  -6  -3  169.18   15.40
  -6 -12  -3  153.38   18.20
 -12   6   3  183.58   13.00
  12  -6   3  179.08   11.00
  -6 -12   3  193.58   15.50
  12  -7  -3    5.50    6.20
  12  -7   3   12.70    3.20
 -12   7   3    2.80    3.30
  -7 -12   3    5.50    5.20
  12  -8  -3    2.40    6.20
  12  -8   3    0.40    2.80
 -12   8   3    0.60    3.30
  -8 -12   3    5.60    4.30
   8  12   3    1.50    4.60
  12  -9  -3    4.30    6.30
   9  12   3   20.10    6.40
  -9 -12   3   14.80    5.50
  12  -9   3   12.60    3.60
 -12   9   3   10.40    4.30
  12 -10  -3  213.98   18.10
  10  12   3  223.28   15.80
 -12  10   3  212.38   17.80
 -10 -12   3  202.28   17.10
  12 -10   3  213.28   13.00
  12 -11  -3    9.50    7.40
  11  12   3    8.20    5.30
 -11 -12   3    6.60    4.80
  12 -12  -3   44.80   10.20
 -12 -12   3   32.00    7.50
  12  12   3   44.60    8.00
  12 -13  -3   -2.50    7.30
  13  12   3    0.90    5.20
  11 -13  -3   -0.90    7.60
  13  11   3    1.50    4.90
 -13 -11   3    4.40    5.60
  13  10  -3    7.10    5.10
  10 -13  -3   12.00    8.40
  13  10   3    6.80    5.30
 -13 -10   3   19.80    6.40
  13   9  -3    7.90    5.00
   9 -13  -3    5.00    8.00
  13   9   3   10.70    5.30
  -9  13   3    8.20    4.50
 -13  -9   3   14.20    5.80
   8 -13  -3    8.20    8.30
  13   8  -3    0.80    5.50
 -13  -8   3   13.90    6.10
  13   8   3   15.60    5.80
  -8  13   3   16.90    5.50
   7 -13  -3    2.20    6.80
  13   7  -3    0.50    4.60
  -7  13   3    5.20    4.30
 -13  -7   3    5.00    5.20
  13   7   3    5.90    4.30
   6 -13  -3    4.70    6.90
  13   6  -3   15.20    5.20
  13   6   3    8.90    4.50
  -6  13   3    4.70    3.90
 -13  -6   3    4.20    4.40
   5 -13  -3   -0.40    6.20
  13   5  -3   14.10    5.40
 -13  -5   3   14.50    5.20
  13   5   3   10.10    4.50
  -5  13   3   10.00    4.80
  13   4  -3   13.00    5.50
   4 -13  -3    7.90    7.40
  13   4   3   17.00    4.80
 -13  -4   3    9.60    4.60
  -4  13   3   17.20    5.20
   3 -13  -3   12.80    7.40
  13   3  -3   18.10    5.70
 -13  -3   3    9.70    4.70
  -3  13   3   12.40    5.20
  13   3   3   15.20    4.50
  13   2  -3   13.10    5.90
   2 -13  -3    9.90    7.50
 -13  -2   3   14.50    4.80
   2 -13   3   12.70    4.70
  13   2   3   14.80    4.50
  -2  13   3   20.90    5.90
   1 -13  -3   -0.20    6.90
  13   1  -3    2.00    4.90
 -13  -1   3    3.20    3.40
  -1  13   3    2.40    4.70
  13   1   3   11.70    3.70
   1 -13   3    2.10    3.60
   0 -13  -3   -0.70    6.70
  13   0  -3   -3.30    4.50
  13   0   3    0.70    3.00
   0  13   3   -4.80    4.00
 -13   0   3    1.60    3.50
   0 -13   3    0.50    4.30
  13  -1  -3   -3.70    4.40
  -1 -13  -3   20.50    8.00
   1  13   3    7.50    4.50
 -13   1   3    2.00    3.50
  -1 -13   3   -3.40    5.60
  13  -1   3    0.80    2.90
  13  -2  -3    4.80    5.50
  -2 -13  -3    7.60    7.60
  13  -2   3    2.50    3.10
 -13   2   3    5.60    3.90
  13  -3  -3  -10.80    5.60
  -3 -13  -3   -2.40    7.30
  -3 -13   3    8.90    5.40
  13  -3   3   13.50    3.80
 -13   3   3   -0.70    3.00
  -4 -13  -3    1.50    7.60
  13  -4  -3    0.80    5.80
 -13   4   3   -1.40    2.70
  13  -4   3    5.10    3.20
  -4 -13   3   11.90    4.80
  -5 -13  -3   22.10    9.20
  13  -5  -3   -2.40    5.70
  -5 -13   3    3.20    4.40
  13  -5   3   -0.70    3.10
 -13   5   3   -0.80    3.10
  -6 -13  -3   -7.80    8.10
  13  -6  -3   -8.40    5.70
  13  -6   3   -1.00    2.90
 -13   6   3   -3.80    2.80
  13  -7  -3   19.80    7.20
  -7 -13   3    3.70    4.80
   7  13   3    2.00    4.80
 -13   7   3    0.00    3.40
  13  -7   3   -1.00    2.90
  13  -8  -3   -1.10    5.70
  13  -8   3    0.20    2.80
  -8 -13   3   -4.80    3.90
 -13   8   3   -3.70    3.10
   8  13   3   -2.70    4.60
  13  -9  -3   -5.90    5.80
  13  -9   3   -0.80    3.10
  -9 -13   3   -3.90    3.90
   9  13   3    3.80    5.20
  13 -10  -3    9.40    7.50
  10  13   3   14.40    6.20
 -10 -13   3    6.80    5.50
  13 -10   3   10.90    4.10
  13 -11  -3    8.20    7.70
 -11 -13   3    7.70    5.30
  11  13   3   20.30    6.30
  13 -12  -3    8.10    8.10
  12  13   3   24.60    7.00
  13 -13  -3    0.40    8.10
  13  13   3    2.70    5.10
  13 -14  -3    4.60    8.90
  14  13   3   -1.80    5.00
  12 -14  -3   37.10   11.20
  14  12   3   30.70    7.30
  11 -14  -3   -1.70    7.70
  14  11   3   -0.20    4.80
  14  10  -3  -11.00    4.80
  10 -14  -3   -8.40    7.00
  14  10   3   -8.60    4.60
   9 -14  -3   -1.70    7.10
  14   9  -3    0.20    4.90
  14   9   3   -4.20    4.70
 -14  -9   3    9.60    6.80
   8 -14  -3    1.70    7.60
  14   8  -3    2.50    4.80
 -14  -8   3    6.00    5.40
  14   8   3    2.60    4.70
  -8  14   3    6.30    5.30
  14   7  -3   26.40    6.60
   7 -14  -3   27.10    8.90
  -7  14   3   23.50    6.80
  14   7   3   26.90    6.10
 -14  -7   3   25.30    6.50
   6 -14  -3  168.28   16.90
  14   6  -3  187.18   14.30
  14   6   3  179.68   13.70
 -14  -6   3  179.28   14.90
  -6  14   3  172.78   14.50
  14   5  -3   -0.70    4.60
   5 -14  -3   -7.50    6.10
  14   5   3    1.10    4.20
 -14  -5   3   -1.70    3.60
  -5  14   3    4.30    4.20
  14   4  -3   16.60    5.90
   4 -14  -3   -4.70    6.90
 -14  -4   3    9.80    4.60
  14   4   3    6.50    4.70
  -4  14   3    6.50    4.40
   3 -14  -3   29.00    9.50
  14   3  -3   28.70    7.10
  -3  14   3   29.90    6.50
   3 -14   3   34.00    6.40
 -14  -3   3   39.80    7.60
  14   3   3   32.40    5.80
   2 -14  -3  121.79   15.10
  14   2  -3  133.19   12.60
 -14  -2   3  133.19   12.00
   2 -14   3  122.19   11.80
  14   2   3  121.49   10.50
  -2  14   3  141.39   13.30
   1 -14  -3   -3.20    6.60
  14   1  -3   -6.10    4.80
  -1  14   3   -3.50    4.40
  14   1   3    2.10    3.50
 -14  -1   3    4.20    4.00
   1 -14   3   -4.10    3.60
   0 -14  -3  215.78   19.00
  14   0  -3  185.18   15.30
   0  14   3  176.78   15.80
 -14   0   3  207.68   14.90
  14   0   3  191.98   12.80
   0 -14   3  201.78   16.20
  14  -1  -3   -3.30    5.00
  -1 -14   3   11.80    7.30
  14  -1   3    1.10    3.20
 -14   1   3    1.90    3.30
  -2 -14  -3   10.10    8.20
  14  -2  -3   12.00    6.00
  14  -2   3    4.80    3.60
  -2 -14   3   23.60    6.30
 -14   2   3   11.00    4.30
  -3 -14  -3    0.20    7.90
  14  -3  -3    1.90    6.10
 -14   3   3    4.40    3.90
  14  -3   3    8.00    3.60
  -3 -14   3    7.90    6.20
  14  -4  -3  318.87   21.20
  -4 -14  -3  278.47   23.90
  -4 -14   3  307.07   21.00
  14  -4   3  332.37   17.70
 -14   4   3  317.37   19.50
  14  -5  -3   15.70    6.90
  -5 -14  -3   -8.20    9.20
 -14   5   3    4.00    3.90
  -5 -14   3    8.30    5.20
  14  -5   3    8.80    3.60
  -6 -14  -3  258.97   23.20
  14  -6  -3  265.87   20.30
 -14   6   3  268.27   17.70
  14  -6   3  268.57   15.60
  -6 -14   3  299.37   20.30
  14  -7  -3   -0.80    6.20
  14  -7   3   -1.40    3.00
  -7 -14   3    6.30    5.30
   7  14   3   -0.50    4.50
  14  -8  -3   -2.20    6.10
  -8 -14   3    0.70    5.70
  14  -8   3   -2.20    3.10
   8  14   3   -2.30    4.60
  14  -9  -3    0.60    6.80
  -9 -14   3    2.90    5.30
  14  -9   3    7.30    3.90
   9  14   3    3.50    5.70
  14 -10  -3    5.20    7.30
 -10 -14   3    9.10    5.40
  14 -10   3    7.30    4.10
  10  14   3    4.10    5.40
  14 -11  -3   16.50    8.60
  11  14   3    3.10    5.60
  14 -12  -3   -0.70    7.60
  12  14   3   -5.60    5.00
  14 -13  -3   -2.70    7.60
  13  14   3   -6.30    4.90
  14 -14  -3    4.60    9.00
  14  14   3    4.20    5.90
  14 -15  -3   -0.90    9.50
  15  14   3   -2.60    5.90
  13 -15  -3  -10.30    8.10
  15  13   3   -6.90    5.10
  12 -15  -3   -7.30    8.00
  15  12   3    1.00    5.30
  11 -15  -3    1.20    7.90
  15  11   3    2.30    5.30
  10 -15  -3    7.90    8.20
  15  10  -3    2.40    6.10
  15  10   3    0.90    4.90
   9 -15  -3    4.10    8.00
  15   9  -3    6.90    5.80
  15   9   3   10.70    5.60
   8 -15  -3   -1.80    7.40
  15   8  -3   -5.10    4.80
  15   8   3   -3.90    4.80
  15   7  -3    8.90    5.70
   7 -15  -3   15.30    8.30
  15   7   3   16.00    5.70
   6 -15  -3    2.10    6.80
  15   6  -3    4.30    5.30
  15   6   3   -2.80    3.90
 -15  -6   3    2.50    4.70
  -6  15   3    2.70    4.30
  15   5  -3    2.80    5.20
   5 -15  -3    1.30    7.30
 -15  -5   3    4.10    4.00
  -5  15   3    1.30    4.30
  15   5   3   -0.40    4.10
   4 -15  -3   -7.00    6.70
  15   4  -3   -4.00    5.40
  15   4   3   -3.90    3.80
 -15  -4   3    2.40    3.90
  -4  15   3   -6.30    3.70
  15   3  -3    2.60    5.80
   3 -15  -3   -0.40    7.10
   3 -15   3   17.60    5.50
  -3  15   3    0.00    4.60
 -15  -3   3    0.00    4.00
  15   3   3   -0.30    3.80
   2 -15  -3   -3.60    7.10
  15   2  -3   -5.60    4.80
  15   2   3   -0.60    3.50
  -2  15   3   -1.20    4.60
   2 -15   3   -0.50    3.90
 -15  -2   3   -0.50    3.70
  15   1  -3    4.00    5.60
   1 -15  -3   -3.60    7.20
  -1  15   3   -0.20    4.70
  15   1   3   -1.70    3.50
   1 -15   3   -5.00    4.70
 -15  -1   3   -4.00    3.30
  15   0  -3   16.00    6.80
   0 -15  -3   14.20    8.30
   0 -15   3   13.40    6.50
   0  15   3   13.30    5.80
 -15   0   3   17.80    5.60
  15   0   3   15.30    4.40
  -1 -15  -3   33.00    9.80
  15  -1  -3    0.00    6.40
 -15   1   3   10.70    4.60
  -1 -15   3   35.70    8.90
  15  -1   3   12.20    4.40
  15  -2  -3   16.50    7.00
  -3 -15  -3   18.40    9.00
  15  -3  -3    1.30    6.40
 -15   3   3   10.00    4.70
  15  -3   3    7.00    4.20
  15  -4  -3   -3.50    5.90
  -4 -15  -3    1.00    8.10
  15  -4   3    1.20    3.60
  -4 -15   3    3.60    4.90
  -5 -15  -3   -3.00    8.20
  15  -5  -3   -7.20    6.10
  -5 -15   3    0.70    4.50
  15  -5   3   -0.60    3.50
  15  -6  -3    8.80    7.50
  15  -6   3    6.90    3.90
  -6 -15   3   14.20    6.20
  15  -7  -3    5.60    7.10
  15  -8  -3   11.80    7.80
   8  15   3    9.00    6.30
  15  -8   3    6.30    3.90
  -8 -15   3   -1.30    6.20
  15  -9  -3    7.50    7.90
   9  15   3   14.20    6.40
  -9 -15   3   11.40    6.70
  15  -9   3   12.00    4.40
  15 -10  -3    0.20    7.70
  15 -10   3   15.80    4.80
  10  15   3    5.90    5.60
  15 -11  -3   -0.40    7.60
  11  15   3    5.10    6.30
  15 -12  -3    6.70    8.60
  12  15   3   -3.80    5.50
  15 -13  -3    7.70    8.90
  13  15   3   -2.40    5.60
  15 -14  -3    8.70    9.50
  14  15   3   -2.20    5.90
  15 -15  -3   -0.50    8.70
  15  15   3   -6.60    5.60
  14 -16  -3   37.90   12.50
  16  14   3   35.00    8.20
  13 -16  -3    3.70    9.30
  16  13   3   -3.20    5.30
  12 -16  -3   93.79   15.30
  16  12   3   94.49   12.00
  11 -16  -3    0.10    8.10
  16  11   3    3.30    5.30
  16  10  -3    1.50    8.30
  10 -16  -3    3.40    8.40
  16  10   3    7.60    5.60
  16   9  -3   -2.00    5.70
   9 -16  -3    8.50    8.20
  16   9   3    1.90    5.30
  16   8  -3  178.18   15.80
   8 -16  -3  190.08   19.60
  16   8   3  204.18   15.30
   7 -16  -3   13.20    8.20
  16   7  -3    8.50    6.30
  16   7   3    9.10    5.30
  16   6  -3   76.89   10.50
   6 -16  -3   71.99   12.40
  16   6   3   94.69   10.40
   5 -16  -3   -2.50    7.70
  16   5  -3   -1.40    5.30
  16   5   3   -4.60    4.10
   4 -16  -3   15.40    9.10
  16   4  -3   28.00    7.30
  16   4   3   10.60    4.90
  -4  16   3   15.10    6.20
   3 -16  -3   -3.50    7.40
  16   3  -3   16.00    6.50
  -3  16   3    6.50    6.00
  16   3   3    5.20    4.60
   2 -16  -3   -4.90    7.10
  16   2  -3    0.80    5.70
  16   2   3   -4.20    3.40
  -2  16   3    1.90    5.20
  16   1  -3    4.30    5.80
   1 -16  -3   -2.70    7.30
   1 -16   3   -2.90    6.20
  -1  16   3    3.80    5.10
  16   1   3    1.00    3.90
  16   0  -3   40.50    8.30
   0 -16  -3   47.70   11.20
   0 -16   3   42.60    9.70
  16   0   3   37.10    6.00
  -1 -16  -3    4.20    7.90
  16  -1  -3    6.40    6.50
  -1 -16   3   -5.70    6.40
  16  -1   3   -0.50    3.70
  16  -2  -3   10.90    6.50
  -2 -16  -3    6.60    8.50
  -2 -16   3   10.20    7.60
  16  -2   3    9.30    4.30
  -3 -16  -3   -6.50    7.80
  16  -3  -3    5.40    6.30
  16  -3   3    6.60    4.10
  -3 -16   3    5.80    7.30
  16  -4  -3  289.27   21.50
  -4 -16  -3  268.37   23.30
  -4 -16   3  273.17   20.80
  16  -4   3  311.37   17.40
  16  -5  -3    5.70    7.10
  -5 -16  -3   15.40   10.00
  16  -5   3    6.40    4.10
  -5 -16   3    6.60    5.30
  16  -6  -3  148.29   16.70
  16  -6   3  157.88   12.10
   6  16   3  183.68   14.40
  -6 -16   3  162.08   24.70
  16  -7  -3   -5.00    6.70
   7  16   3    4.20    5.40
  16  -7   3   -0.30    3.60
  16  -8  -3   56.49   11.70
   8  16   3   74.39   10.40
  16  -8   3   58.89    7.40
  16  -9  -3   -7.80    7.90
   9  16   3    1.70    5.70
  16  -9   3   -4.30    4.10
  10  16   3  161.38   14.80
  16 -10   3  141.39   12.40
  16 -11  -3   -7.10    7.80
  11  16   3   -3.80    5.80
  16 -12  -3   -1.40    8.30
  12  16   3   24.40    7.00
  16 -13  -3   -7.80    7.70
  13  16   3   -1.90    5.80
  16 -14  -3   22.10   10.80
  14  16   3   20.20    7.50
  13 -17  -3    1.80    9.90
  17  13   3   -0.50    5.80
  12 -17  -3   -4.90    9.00
  17  12   3    1.60    5.70
  11 -17  -3   17.10    9.80
  17  11   3    1.40    5.30
  10 -17  -3    9.00    9.20
  17  10   3   11.60    6.00
   9 -17  -3    8.40    8.60
  17   9  -3    6.30    6.10
  17   9   3    0.80    5.30
  17   8  -3    9.90    6.90
   8 -17  -3   14.50    8.80
  17   8   3   16.20    6.40
   7 -17  -3   -0.70    8.00
  17   7   3   14.20    5.90
  17   6  -3   -8.80    5.30
   6 -17  -3   -5.50    7.60
  17   6   3    1.70    4.70
   5 -17  -3   25.90    9.40
  17   5  -3    8.20    6.30
  17   5   3   10.90    5.20
  17   4  -3   19.00    6.90
   4 -17  -3    5.60    8.30
  17   4   3   13.60    5.30
  17   3  -3    2.80    6.10
   3 -17  -3   -4.00    8.00
  17   3   3   -2.70    3.80
   2 -17  -3   -9.00    8.00
  17   2  -3    9.50    6.40
  -2  17   3    2.80    5.40
  17   2   3    0.20    4.00
  17   1  -3   -2.10    6.00
   1 -17  -3   -7.80    8.20
  17   1   3   -2.80    3.90
  -1  17   3    5.20    5.30
   0 -17  -3  -16.60    7.90
  17   0  -3   -8.30    5.80
  17   0   3    4.80    4.20
  -1 -17  -3   -3.70    8.40
  17  -1  -3    0.80    6.60
  17  -1   3   -1.30    3.80
  17  -2  -3    6.60    6.90
  -2 -17  -3   -6.90    8.20
  17  -2   3    3.70    4.00
  -3 -17  -3   56.09   11.70
  17  -3  -3    6.80    6.80
  17  -3   3    9.70    4.50
  17  -4  -3   -0.50    6.90
  -4 -17  -3   -6.30    9.40
  17  -4   3   -3.60    4.10
  17  -5  -3    4.90    7.50
  -5 -17  -3   -7.30    8.70
  17  -5   3   -3.40    4.00
  17  -6  -3    9.40    8.00
  17  -6   3    6.60    4.50
   6  17   3    9.00    6.40
  17  -7  -3   15.70    8.80
  17  -7   3    5.80    4.60
   7  17   3   21.20    6.80
  17  -8  -3    7.70    8.20
   8  17   3    1.80    5.70
  17  -8   3    4.30    4.70
  17  -9  -3    2.30    8.00
  17  -9   3   -0.80    4.40
   9  17   3    3.00    5.70
  17 -10  -3   -1.50    8.10
  10  17   3    8.50    6.40
  17 -10   3    8.50    5.30
  17 -11  -3   -5.50    8.20
  11  17   3    2.70    6.70
  17 -12  -3    1.10    8.40
  12  17   3   -3.00    5.90
  17 -13  -3   18.20   10.40
  13  17   3    9.70    6.80
  12 -18  -3   27.20   11.90
  18  12   3   23.90    7.20
  11 -18  -3    9.00    9.70
  18  11   3   -0.60    5.10
  10 -18  -3   17.00    9.80
  18  10   3    2.80    5.50
   9 -18  -3    6.00    9.20
  18   9  -3    9.50    6.80
  18   9   3   11.00    6.00
   8 -18  -3  149.99   18.90
  18   8  -3  153.18   15.70
  18   8   3  149.09   13.50
  18   7  -3    4.00    6.30
   7 -18  -3    7.40    9.30
  18   7   3    3.70    5.30
   6 -18  -3   98.39   15.20
  18   6  -3   97.29   12.10
  18   6   3   96.79   11.40
  18   5  -3   10.60    6.80
   5 -18  -3    0.20    8.20
  18   5   3    8.90    5.20
   4 -18  -3   56.19   12.20
  18   4  -3   39.90    9.20
  18   4   3   54.39    8.00
  18   3  -3    3.00    6.40
   3 -18  -3   -4.50    8.00
  18   3   3    4.70    4.60
   2 -18  -3  127.39   16.40
  18   2  -3  119.19   14.50
  18   2   3  139.09   12.00
   1 -18  -3   -2.90    8.80
  18   1  -3   -3.30    6.20
  18   1   3    0.50    4.40
  18   0  -3   -8.40    6.00
   0 -18  -3   -5.50    8.80
  18   0   3    2.30    4.40
  18  -1  -3   -2.70    6.40
  -1 -18  -3   20.10    9.70
  18  -1   3    4.50    4.20
  -2 -18  -3   28.90   10.40
  18  -2  -3   17.90    8.00
  18  -2   3   16.60    5.40
  18  -3  -3    1.60    7.60
  -3 -18  -3   16.60   10.40
  18  -3   3    4.80    4.50
  -4 -18  -3   -1.20    9.80
  18  -4  -3   16.90    8.30
  18  -4   3   11.50    5.10
  18  -5  -3   -1.40    7.40
  18  -5   3    0.20    4.40
  18  -6  -3    5.10    7.80
   6  18   3    7.90    6.20
  18  -6   3   -0.60    4.40
  18  -7  -3    1.00    7.60
  18  -7   3   -1.30    4.30
   7  18   3   -2.80    6.30
  18  -8  -3   23.00    9.50
   8  18   3   12.90    6.80
  18  -8   3   11.60    5.30
  18  -9  -3   -0.20    8.20
  18  -9   3    4.00    5.30
   9  18   3   16.20    6.80
  18 -10  -3   41.60   11.60
  18 -10   3   38.20    9.60
  10  18   3   57.29   10.20
  18 -11  -3    2.40    8.40
  11  18   3    5.40    6.80
  18 -12  -3    8.80    9.20
  12  18   3   -1.10    6.20
  19  10   3    2.80    5.60
  19   9  -3    1.50    6.70
  19   9   3   -2.40    4.90
  19   8  -3   19.10    7.60
  19   8   3   -2.30    5.20
   7 -19  -3    0.50   12.80
  19   7  -3    0.90    6.70
  19   7   3    0.20    5.20
   6 -19  -3   19.40   11.40
  19   6  -3    6.50    7.20
  19   6   3    8.60    5.70
  19   5  -3    7.70    7.30
   5 -19  -3   23.60   12.00
  19   5   3    7.60    5.50
  19   4  -3    4.40    7.20
   4 -19  -3    2.80    9.50
  19   4   3    3.30    5.00
   3 -19  -3    2.50    8.90
  19   3  -3    0.50    6.60
  19   3   3   -0.60    4.80
  19   2  -3    9.20    7.10
   2 -19  -3    1.30    9.40
  19   2   3    1.60    4.70
   1 -19  -3   11.00   10.40
  19   1  -3    7.60    7.00
  19   1   3    5.90    4.90
   0 -19  -3   10.90   10.00
  19   0  -3    8.30    7.80
  19   0   3   13.90    5.30
  -1 -19  -3    1.70    9.30
  19  -1  -3   -0.60    7.00
  19  -1   3    0.90    4.50
  19  -2  -3   12.50    8.10
  -2 -19  -3   17.00   10.10
  19  -2   3    5.30    4.70
  19  -3  -3    7.50    8.00
  -3 -19  -3   11.80   10.90
  19  -3   3    0.10    4.60
  -4 -19  -3    9.20   11.00
  19  -4  -3   -5.80    7.40
  19  -4   3   -2.90    4.40
  19  -5  -3   -5.30    7.60
  19  -5   3  -11.00    4.30
  19  -6  -3   -3.50    7.90
  19  -6   3   -4.70    4.40
  19  -7  -3    4.10    8.50
  19  -7   3   -1.40    4.50
  19  -8  -3   -0.80    8.30
  19  -8   3    0.60    5.00
  19  -9  -3    2.10    8.80
  19  -9   3    1.40    5.20
  19 -10  -3   -1.10    8.50
  20   8  -3    4.80    7.10
  20   8   3   -2.80    5.00
  20   7  -3    7.20    7.30
  20   7   3    2.30    5.40
  20   6  -3   -4.70    7.10
  20   6   3    1.10    5.00
  20   5  -3   -1.70    7.10
  20   5   3    1.70    5.10
  20   4  -3   15.50    8.30
  20   4   3   25.00    6.70
  20   3  -3    9.80    7.70
  20   3   3    3.10    5.10
  20   2  -3  128.39   15.80
  20   2   3  110.39   12.10
  20   1  -3   -2.20    7.10
  20   1   3   -4.70    5.00
  20   0  -3   -3.00    7.30
  20   0   3   -0.50    4.80
  20  -1  -3   -1.30    7.60
  20  -1   3    5.00    5.30
  20  -2  -3  172.58   18.60
  20  -2   3  179.98   14.30
  20  -3  -3    5.10    7.90
  20  -3   3   -1.00    4.90
  20  -4  -3   64.59   12.50
  20  -4   3   75.09    9.30
  20  -5  -3    4.00    8.50
  20  -5   3    1.20    5.10
  20  -6  -3    0.00    8.40
  20  -6   3   -1.50    4.90
  20  -7  -3   -1.60    8.50
  20  -7   3   -2.10    5.10
  20  -8  -3    6.50    9.00
  20  -8   3    7.10    5.80
  21   5  -3   -3.70    7.00
  21   5   3   -8.10    4.80
  21   4  -3    2.00    7.30
  21   4   3   -5.50    5.00
  21   3  -3    7.60    7.80
  21   3   3   -3.00    5.10
  21   2  -3    7.70    8.00
  21   2   3    5.90    5.40
  21   1  -3    4.60    8.20
  21   1   3    8.80    6.00
  21   0  -3    0.10    8.10
  21   0   3   10.90    6.00
  21  -1  -3   10.90    8.60
  21  -1   3    9.90    6.00
  21  -2  -3   -1.60    8.00
  21  -2   3    3.10    5.50
  21  -3  -3   -0.50    8.20
  21  -3   3   -7.40    4.60
  21  -4  -3    7.40    9.30
  21  -4   3   -3.40    4.90
  21  -5  -3    4.10    9.00
  21  -5   3   -3.30    5.00
   0   0  -4   52.29    7.90
   1   0  -4   -0.40    4.40
  -1   0  -4   13.50    5.60
   0   1  -4   -1.80    4.50
   0  -1  -4   -1.90    5.10
   1   1  -4   86.89    9.40
  -1   1  -4   90.19   10.60
   1  -1  -4   84.59   10.20
   2   1  -4   99.59   10.20
   1  -2  -4  135.99   12.20
  -1   2  -4   93.19   11.50
  -2  -1  -4  132.69   12.90
  -1  -2  -4   22.80    6.80
  -2   1  -4   28.00    6.90
   2  -1  -4   14.80    5.50
   2  -2  -4   16.10    5.50
   2  -3  -4   88.59   10.80
  -2   3   4   51.89    5.50
  -3  -1  -4  234.18   17.20
   1  -3  -4  189.38   15.90
   3   1  -4  218.48   14.70
  -1   3  -4  237.68   15.60
  -3  -1   4  193.78   11.90
  -1   3   4  208.48   11.40
  -3   0  -4    1.70    6.30
   0   3  -4   12.10    5.60
   3   0  -4    2.20    4.70
   0  -3  -4    6.80    7.00
  -3   0   4    1.80    2.20
  -3   1  -4 1055.29   50.79
   1   3  -4  985.30   49.20
   3  -1  -4  996.20   49.99
  -1  -3  -4 1054.99   51.49
  -3   1   4 1001.00   47.50
   3  -2  -4   18.60    5.60
  -3   2  -4   10.80    6.10
  -2  -3  -4   13.90    6.60
   2   3  -4   13.40    5.30
   3  -3  -4 1260.47   61.79
  -3  -3  -4 1234.68   62.49
  -3   3  -4 1257.57   61.19
   3   3  -4 1254.47   60.29
  -3  -3   4 1276.17   59.29
  -3   3   4 1322.07   58.99
  -4  -3  -4    9.80    7.10
   4   3  -4   25.00    5.30
   3  -4  -4   12.80    6.40
  -3   4  -4   15.30    6.10
  -4  -3   4   19.60    4.40
  -3   4   4   16.10    3.20
  -4  -2  -4   23.10    7.90
  -2   4  -4    7.10    5.80
   4   2  -4   11.30    5.00
  -4  -2   4   18.90    3.60
  -2   4   4   18.90    3.40
  -1   4  -4   70.99    9.00
   4   1  -4   93.09    9.70
  -4  -1  -4   80.89   11.60
   1  -4  -4   97.09   12.50
  -1   4   4   86.29    6.60
  -4  -1   4   73.49    7.10
  -4   0  -4    5.50    6.30
   4   0  -4    5.80    4.70
   0  -4  -4   10.20    7.70
  -4   0   4    3.40    2.60
  -1  -4  -4    9.10    7.20
  -4   1  -4   20.00    6.90
   1   4  -4   25.10    6.00
   4  -1  -4   27.10    6.10
  -4   1   4   13.50    3.20
   2   4  -4    9.80    4.80
  -2  -4  -4   -5.60    5.50
   4  -2  -4   -1.00    4.90
  -4   2   4   -2.20    2.30
   4  -3  -4   10.40    6.20
   4  -4  -4   -2.80    5.70
  -4  -4  -4   -6.20    6.00
   4   4  -4   -0.60    3.90
  -4   4   4   -1.60    2.40
  -4  -4   4    5.10    2.80
   4  -4   4   -2.20    2.80
  -5  -4  -4   46.70    9.60
   5   4  -4   52.49    6.90
  -4   5   4   49.10    5.70
   4  -5   4   45.00    5.70
  -5  -4   4   46.70    6.00
   3  -5  -4   14.50    6.80
  -5  -3  -4   23.60    8.20
   3  -5   4   19.60    3.60
  -3   5   4   23.80    3.90
  -5  -2  -4    6.50    6.80
   2  -5  -4    4.80    5.70
   5   2  -4    6.50    4.60
  -5  -2   4    8.00    3.30
  -2   5   4    7.00    2.70
   1  -5  -4  295.07   19.80
  -1   5  -4  257.17   16.90
   5   1  -4  330.27   18.10
  -5  -1  -4  236.18   20.10
  -1   5   4  278.97   15.50
  -5  -1   4  313.47   16.10
   0   5  -4   18.40    5.30
  -5   0  -4   20.60    7.80
   0  -5  -4   20.70    8.50
   5   0  -4   21.20    5.40
   0   5   4   21.40    3.60
  -5   0   4   20.10    3.70
  -5   1  -4  207.18   16.40
   5  -1  -4  165.58   14.40
   1   5  -4  171.48   13.30
  -1  -5  -4  249.78   18.00
  -1  -5   4  183.78   11.80
  -5   1   4  189.98   11.80
   1   5   4  235.88   12.00
  -2  -5  -4   92.09   11.20
   5  -2  -4  106.59   11.10
   2   5  -4  103.99    9.30
  -5   2   4   83.09    7.10
  -2  -5   4   77.39    8.00
   5  -2   4   95.69    7.80
   2   5   4   99.49    7.70
   5  -3  -4   62.09    9.00
  -3  -5  -4   55.99   10.10
   3   5  -4   62.29    8.10
  -5   3   4   61.09    6.10
   5  -3   4   51.59    6.30
  -3  -5   4   62.29    7.00
   4   5  -4   13.50    4.40
   5  -4  -4    9.20    6.40
  -5   4   4   13.80    3.40
  -4  -5   4   12.40    3.80
   5   5  -4  550.94   25.40
   5  -5  -4  428.26   27.30
  -5  -5  -4  435.46   28.80
   5  -5   4  429.16   22.90
  -5   5   4  484.15   24.20
   6   5  -4   17.30    4.50
   5  -6  -4   21.10    7.20
  -6  -5  -4   14.10    8.30
  -6  -5   4    9.20    3.80
  -5   6   4    3.70    3.20
   5  -6   4    5.50    2.50
   6   4  -4   23.00    5.40
  -6  -4  -4    2.00    8.00
   4  -6  -4    1.70    5.90
  -4   6   4    6.90    3.10
   4  -6   4    5.50    2.60
  -6  -4   4    8.20    4.50
  -6  -3  -4  167.58   17.10
   6   3  -4  174.58   13.30
   3  -6  -4  151.18   15.00
  -6  -3   4  185.18   12.10
  -3   6   4  161.98   10.80
   3  -6   4  162.18    9.80
  -6  -2  -4   36.70    8.50
   2  -6  -4   -5.00    5.40
   6   2  -4   -3.60    4.30
  -2   6   4    0.00    2.90
  -6  -2   4    3.70    2.90
  -6  -1  -4    7.00    6.90
   6   1  -4   -4.60    4.20
  -1   6  -4   -7.10    4.10
   1  -6  -4    5.20    6.60
  -1   6   4    1.10    2.80
  -6  -1   4    0.50    2.50
   0   6  -4    0.30    4.10
   6   0  -4   -0.60    4.30
   0  -6  -4    0.30    7.10
   0  -6   4    5.70    2.70
  -6   0   4    3.50    2.80
   0   6   4   -0.50    2.80
   1   6  -4   96.79    9.90
   6  -1  -4  102.39   10.80
  -1  -6  -4  106.59   13.70
  -1  -6  -4   98.69    7.80
   1   6   4  108.99    8.30
   6  -1   4   84.39    8.50
  -6   1   4  107.69    8.20
  -1  -6   4  112.29    8.40
  -2  -6  -4    4.40    6.40
   6  -2  -4   10.70    5.30
   2   6  -4    3.70    3.90
  -2  -6  -4    5.30    2.70
   6  -2   4    3.40    3.10
  -6   2   4    4.50    2.70
  -2  -6   4   -0.50    3.10
   2   6   4    1.20    3.00
   3   6  -4   -7.60    4.10
  -3  -6  -4   29.70    7.90
   6  -3  -4   -0.10    5.00
   6  -3   4    2.30    3.30
  -3  -6   4    7.90    3.30
  -6   3   4    0.20    2.50
   6  -4  -4    9.20    6.00
   4   6  -4   -2.20    3.70
  -4  -6  -4   16.30    7.60
  -6   4   4   -2.40    2.50
   6  -4   4   -2.60    2.80
  -4  -6   4    3.90    3.60
   5   6  -4   61.79    7.50
  -5  -6  -4   76.49   11.60
  -6   5   4   68.59    7.10
  -5  -6   4   70.99    8.20
   6  -5   4   51.99    6.20
   6   6  -4    9.50    4.30
  -6  -6  -4   -6.00    7.20
   6  -6  -4   -9.00    6.00
  -6   6   4   -0.30    2.60
   6  -6   4    4.30    2.60
  -6  -6   4    2.00    3.50
   6  -7  -4   13.70    7.40
  -7  -6  -4   29.30    9.80
  -7  -6   4   25.10    5.20
   6  -7   4   10.40    2.90
  -6   7   4   15.00    4.00
  -7  -5  -4 1096.29   56.79
   5  -7  -4 1108.19   55.89
   7   5  -4 1104.89   53.29
   5  -7   4 1084.89   50.49
  -5   7   4 1081.39   52.49
  -7  -5   4 1105.79   53.69
   4  -7  -4   53.19    9.40
  -7  -4  -4   53.09   11.50
  -4   7   4   40.70    5.60
   7   4   4   42.20    5.10
   4  -7   4   50.79    5.00
   3  -7  -4  394.86   24.90
   7   3  -4  406.16   23.10
  -7  -3   4  415.86   22.40
   7   3   4  366.66   21.70
  -3   7   4  412.06   21.50
   3  -7   4  402.66   19.30
   7   2  -4   14.00    5.30
  -7  -2   4   15.60    4.20
   7   2   4    8.80    4.70
   2  -7   4   20.80    3.30
   7   1  -4  485.55   29.00
   1  -7  -4  515.05   31.50
  -1   7   4  509.05   27.40
   1  -7   4  626.34   26.90
  -7  -1   4  536.75   27.90
   1  -7   4  606.94   27.40
   7   1   4  477.25   27.50
   7   0  -4   82.59    9.70
   0   7  -4   67.99    7.40
  -7   0   4   78.59    7.50
   7   0   4   78.29    8.30
   0  -7   4   76.79    7.40
   0  -7   4   65.89    7.60
  -1  -7  -4  512.25   31.10
  -1  -7  -4  481.25   26.00
   7  -1  -4  494.85   28.70
   1   7  -4  508.15   26.00
  -7   1   4  543.55   26.80
   1   7   4  538.65   26.80
  -1  -7   4  508.55   26.50
   7  -1   4  546.75   26.60
   7  -2  -4    5.80    5.70
  -2  -7  -4    4.70    6.70
  -2  -7  -4    2.80    2.80
   2   7   4    3.60    3.50
  -7   2   4   -1.30    2.70
   7  -2   4    1.60    3.00
  -2  -7   4    3.40    3.60
   7  -3  -4   -2.60    5.00
   3   7  -4   -1.90    3.90
  -3  -7  -4   -2.60    7.10
  -3  -7  -4    2.80    3.00
   7  -3   4    1.70    3.00
  -7   3   4    1.30    2.80
  -3  -7   4    1.00    3.90
  -4  -7  -4   42.90   10.30
  -4  -7  -4   49.70    6.20
   4   7  -4   70.19    7.10
   7  -4  -4   47.70    8.20
   7  -4   4   53.79    6.10
  -7   4   4   45.30    6.30
  -4  -7   4   61.99    8.00
   7  -5  -4    5.80    5.90
   5   7  -4    0.40    3.70
  -7   5   4    2.60    3.10
   7  -5   4    3.20    2.80
  -5  -7   4    0.80    3.70
  -6  -7  -4   40.80   10.60
   7  -6  -4   47.10    9.20
   7  -6   4   37.10    4.60
  -7   6   4   49.99    6.40
   7  -7  -4  107.39   12.80
  -7  -7  -4   85.99   13.20
   7   7  -4   94.79   10.20
   7  -7   4   91.79    6.70
  -7  -7   4  108.69   10.10
  -7   7   4   96.99    8.70
   7  -8  -4   11.00    7.00
   8   7  -4   20.20    4.90
   7  -8   4   -2.50    2.10
   7  -8   4   -1.70    2.40
   8   7   4   -2.80    3.70
  -7   8   4    3.20    3.30
  -8  -7   4    1.20    3.70
   8   6  -4    9.70    4.40
   6  -8  -4    2.70    6.70
   8   6   4   -3.20    3.80
  -6   8   4    8.70    3.20
   6  -8   4   -4.30    2.30
  -8  -6   4    1.30    3.50
   6  -8   4   -3.90    1.80
   5  -8  -4   20.50    8.10
  -5   8   4   14.50    3.90
   5  -8   4   15.10    3.10
   8   5   4   16.90    3.70
   5  -8   4   16.00    2.40
   8   5   4   19.30    5.00
  -8  -5   4   21.10    5.80
   4  -8  -4    8.90    6.70
   8   4  -4    9.80    5.40
   8   4   4   10.90    3.20
   4  -8   4   10.30    2.10
   8   4   4   10.80    4.40
  -8  -4   4    8.10    4.50
   4  -8   4   10.00    2.90
  -4   8   4   14.20    4.00
   3  -8  -4   70.09   10.20
   8   3  -4   95.79   10.90
  -8  -3   4   67.69    8.10
   3  -8   4   65.09    6.70
   8   3   4   73.69    8.40
  -3   8   4   63.79    7.90
   8   3   4   61.19    6.40
   3  -8   4   60.19    6.60
   2  -8  -4   -2.00    6.60
   8   2  -4    0.60    5.10
   2  -8   4    2.30    2.90
   8   2   4   -2.70    3.50
  -2   8   4   -5.70    3.40
   2  -8   4   -1.00    3.20
  -8  -2   4    5.70    3.40
   8   1  -4   28.00    6.50
   1  -8  -4   13.10    9.20
  -1   8   4   20.10    4.90
  -8  -1   4   28.50    4.70
   1  -8   4   20.60    5.30
   1  -8   4   12.00    3.80
   8   0  -4   10.30    5.40
   0  -8  -4   -8.80    7.90
   0   8   4    3.10    3.30
   8   0   4    5.10    4.00
  -8   0   4    7.00    3.20
  -1  -8  -4   67.69   12.00
   8  -1  -4   58.49    9.30
  -1  -8  -4  100.59    8.80
   1   8   4   83.39    8.90
  -1  -8   4   97.39    8.70
  -8   1   4   70.99    7.80
   8  -1   4  100.29    8.50
  -1  -8   4   84.59    8.40
   8  -2  -4   -3.30    5.20
  -2  -8  -4    3.10    3.00
  -2  -8  -4   -6.40    6.40
   8  -2   4   11.30    3.70
  -8   2   4    9.90    3.20
  -2  -8   4    7.00    3.50
   2   8   4   -5.60    3.60
  -3  -8  -4   18.20    5.00
  -3  -8  -4    8.00    7.30
   8  -3   4   30.40    4.50
  -4  -8  -4    2.60    7.50
   4   8  -4   -9.10    3.80
   8  -4  -4   -5.20    5.10
  -4  -8   4    3.70    3.60
  -8   4   4    0.10    2.70
  -5  -8  -4   17.60    8.40
   8  -5  -4   -5.20    5.50
   5   8  -4   14.90    4.10
   8  -5   4   10.50    3.20
  -5  -8   4   11.20    4.20
  -6  -8  -4   -9.70    7.20
   8  -6  -4    2.40    5.40
   6   8  -4   -3.50    3.70
  -6  -8   4   -1.40    3.50
   8  -6   4    4.80    2.40
  -8   6   4   -3.50    2.90
   7   8  -4    4.40    3.60
  -7  -8  -4    3.50    8.10
   8  -7  -4   -5.20    5.30
  -7  -8   4   -2.90    3.40
  -8   7   4   -1.80    2.90
   8  -7   4    0.20    2.10
   8  -7   4   -3.20    2.20
   8  -8  -4    5.30    6.40
   8   8  -4   12.00    4.50
  -8   8   4    4.80    3.30
   8   8   4   -6.50    4.10
  -8  -8   4    5.30    3.90
   8  -8   4    1.20    2.10
   9   8  -4   27.90    5.80
   8  -9   4    0.10    2.20
   9   8   4   -7.50    3.80
  -9  -8   4    0.90    3.30
  -8   9   4   14.10    4.00
   7  -9  -4   25.70    8.10
   9   7  -4   28.70    6.10
   9   7   4   24.40    5.80
  -9  -7   4   24.10    5.80
  -7   9   4   25.30    5.30
   7  -9   4   20.90    3.80
   9   6  -4   18.00    5.50
  -9  -6   4   15.10    5.30
  -6   9   4   20.30    4.30
   9   6   4    8.20    4.40
   9   5  -4  305.97   19.20
   5  -9  -4  279.17   21.80
   5  -9   4  301.77   16.40
  -5   9   4  311.77   18.00
  -9  -5   4  327.57   19.60
   9   5   4  293.77   17.20
   9   5   4  290.27   18.50
   9   4  -4    3.10    5.30
   4  -9  -4    5.50    6.90
   9   4   4   13.00    4.50
  -9  -4   4    6.90    4.50
   9   4   4   13.60    3.60
   4  -9   4   12.60    3.20
  -4   9   4   15.60    4.30
   9   3  -4  125.29   12.30
   3  -9  -4   79.99   11.50
  -9  -3   4   93.79    9.30
   9   3   4   85.89    7.30
  -3   9   4   96.49    8.80
   3  -9   4   80.59    7.70
   9   3   4   91.89    8.90
   3  -9   4   72.49    7.80
   2  -9  -4   -3.30    6.90
   9   2  -4   -0.80    5.20
  -2   9   4    5.70    3.90
   9   2   4    0.70    3.50
   2  -9   4   -3.90    3.50
   9   2   4    2.10    2.70
   2  -9   4   -2.60    2.90
  -9  -2   4    1.50    3.50
   9   1  -4  311.17   20.40
   9   1   4  318.57   18.00
   1  -9   4  297.47   17.50
   1  -9   4  299.47   18.50
  -9  -1   4  333.97   18.70
   0  -9  -4   -4.20    8.30
   9   0  -4   -6.50    5.50
   0   9   4    2.20    3.60
   0  -9   4   13.40    4.70
  -9   0   4    8.50    3.70
   0  -9   4    9.90    4.30
   9   0   4    1.20    3.80
   9  -1  -4  370.66   24.10
  -1  -9  -4  403.06   27.20
   1   9   4  410.36   22.70
  -1  -9   4  407.96   22.20
  -1  -9   4  417.16   22.00
  -9   1   4  404.36   22.20
   9  -1   4  381.86   21.30
   9  -2  -4   25.20    7.00
  -2  -9  -4   30.80    9.50
  -9   2   4   26.10    5.10
   2   9   4   34.00    6.20
   9  -2   4   23.00    4.60
  -2  -9   4   28.00    5.30
  -3  -9  -4  133.49   16.60
   9  -3  -4  105.89   12.80
   9  -3   4  155.08    9.90
  -9   3   4  135.89   10.40
   9  -4  -4   56.49    9.20
  -4  -9   4   62.99    8.80
   9  -4   4   56.19    6.60
  -9   4   4   51.49    6.70
  -5  -9  -4  548.65   33.50
   9  -5  -4  531.65   31.40
  -5  -9   4  567.24   30.10
  -9   5   4  556.24   28.90
   9  -5   4  553.44   27.30
   9  -6  -4   22.90    7.30
  -6  -9  -4   23.90    9.70
  -6  -9   4   27.60    6.20
   9  -6   4   23.10    3.70
   9  -6   4   23.70    4.10
  -9   6   4   20.10    4.60
  -7  -9  -4  107.69   14.80
   9  -7  -4  114.59   13.50
  -7  -9   4  112.59   11.30
  -9   7   4  120.49   10.10
   9  -7   4  114.79    7.80
   9  -8  -4    5.10    6.20
   9  -8   4    1.30    2.10
   8   9   4   -5.00    4.20
  -8  -9   4    0.30    3.60
  -9   8   4   -0.20    3.20
   9  -9  -4    0.10    6.40
   9  -9   4    4.70    2.40
  -9  -9   4   -1.20    3.50
   9   9   4    2.40    4.70
  -9   9   4   -2.30    2.90
   9 -10  -4   -5.40    6.80
 -10  -9   4   12.40    5.20
  10   9   4   10.70    5.10
  -9  10   4    3.20    3.70
  10   8  -4   -1.60    3.80
   8 -10  -4   -1.40    6.90
  -8  10   4   -1.90    2.80
  10   8   4   -5.10    4.00
 -10  -8   4   -0.70    3.70
   7 -10  -4   -0.60    6.60
  10   7  -4    6.20    4.60
 -10  -7   4    3.50    4.30
  10   7   4    3.70    4.40
  -7  10   4    3.40    3.30
   6 -10  -4   12.50    7.30
  10   6  -4   11.40    5.90
 -10  -6   4   17.90    6.20
  10   6   4   14.70    5.40
  -6  10   4   11.80    4.40
   5 -10  -4    1.10    6.30
  10   5  -4    2.00    5.10
 -10  -5   4   11.70    4.40
  10   5   4   -4.30    3.70
  -5  10   4    4.70    3.50
   4 -10  -4   -3.90    6.20
  10   4  -4   -7.60    5.00
  10   4   4   -1.50    3.40
 -10  -4   4   -0.20    3.20
  -4  10   4    1.00    3.10
  10   3  -4   -1.70    5.20
   3 -10  -4   -1.50    5.70
  10   3   4    0.10    2.70
   3 -10   4   -1.30    2.90
 -10  -3   4   -1.60    3.10
  10   3   4   -3.20    3.20
  -3  10   4    1.90    3.20
  10   2  -4   -4.20    5.00
  -2  10   4    4.10    3.60
  10   2   4   -1.00    2.40
  10   2   4   -1.30    3.30
 -10  -2   4   -0.10    3.20
   2 -10   4   -7.40    3.10
   2 -10   4   -5.00    3.00
   1 -10  -4   24.50    9.70
  10   1  -4   15.90    6.80
 -10  -1   4   23.10    5.10
   1 -10   4   21.00    5.70
   1 -10   4   19.10    5.30
  10   1   4   22.50    5.00
  -1  10   4   16.20    4.90
  10   0  -4    9.40    6.00
   0 -10  -4    5.40    7.50
   0  10   4   11.40    4.00
 -10   0   4   -0.40    3.20
   0 -10   4    2.70    4.40
  10   0   4    0.90    3.60
  10   0   4    2.60    2.60
  -1 -10  -4    5.50    7.40
  10  -1  -4  -11.90    5.00
  10  -1   4   -2.90    3.20
   1  10   4   -2.40    3.90
 -10   1   4    1.30    3.30
  -2 -10  -4   -1.20    6.90
  10  -2  -4   -5.60    5.50
  -2 -10   4    3.70    3.80
  10  -2   4   -0.90    3.20
   2  10   4   -3.70    3.80
 -10   2   4    1.20    3.10
  -3 -10  -4   50.99   10.40
  10  -3  -4   45.30    8.70
  -3 -10   4   44.00    7.00
 -10   3   4   45.20    6.70
  10  -3   4   43.70    5.70
  10  -4  -4    5.80    5.70
  -4 -10  -4   15.40    8.20
  10  -4   4    6.60    3.20
  10  -4   4    0.20    2.60
  -4 -10   4    1.50    4.00
 -10   4   4   -0.40    3.00
  -5 -10  -4   16.20    8.80
  10  -5  -4   -2.70    5.60
 -10   5   4    2.70    3.10
  -5 -10   4    8.60    4.80
  10  -5   4    1.90    2.90
  10  -5   4    5.80    3.00
  -6 -10  -4   -1.30    8.10
  10  -6  -4   -4.80    5.80
  10  -6   4    1.70    2.60
 -10   6   4   -1.30    3.10
  -6 -10   4    1.20    3.60
  -7 -10  -4   21.00    9.40
  10  -7  -4    9.60    7.20
 -10   7   4   12.40    4.50
  -7 -10   4   10.90    5.20
  10  -7   4   11.90    3.20
  10  -8  -4   12.20    7.40
  -8 -10   4    8.30    4.70
   8  10   4    9.10    5.50
 -10   8   4   10.70    4.20
  10  -8   4    7.20    2.80
  10  -9  -4   -3.00    6.30
   9  10   4   -5.60    4.60
  10  -9   4   -0.80    2.40
 -10   9   4   -1.00    3.00
  -9 -10   4    1.20    4.00
  10 -10  -4   12.80    7.60
 -10  10   4   -2.00    3.40
 -10 -10   4    4.50    4.40
  10  10   4    1.90    5.10
  10 -11  -4    1.90    7.50
 -11 -10   4    2.40    4.60
 -10  11   4    2.40    3.60
  11  10   4    4.30    5.40
   9 -11  -4   24.80    9.20
 -11  -9   4   19.00    6.10
  11   9   4   22.20    6.20
  -9  11   4   17.90    5.30
  11   8  -4    6.10    5.40
   8 -11  -4    9.20    8.00
  11   8   4   10.10    5.20
 -11  -8   4    3.80    4.80
  -8  11   4    6.30    4.30
   7 -11  -4  122.59   15.00
  11   7  -4   81.19   10.90
  11   7   4  118.19   11.20
 -11  -7   4  126.39   13.10
  -7  11   4  116.49   10.50
  11   6  -4   16.30    6.80
   6 -11  -4   14.90    8.20
  11   6   4   28.50    5.80
  -6  11   4   35.70    6.20
 -11  -6   4   41.00    8.10
  11   5  -4  107.09   12.50
   5 -11  -4  111.19   14.10
  11   5   4  122.09   11.10
  -5  11   4  125.89   10.90
 -11  -5   4  125.39   11.80
   4 -11  -4    1.10    6.90
  11   4  -4    4.80    6.20
  11   4   4    3.80    4.20
  -4  11   4   19.30    5.30
 -11  -4   4   11.50    4.30
  11   3  -4    3.10    6.10
   3 -11  -4   -5.60    7.00
  -3  11   4    4.80    4.00
  11   3   4    8.40    4.40
   3 -11   4    9.80    4.20
 -11  -3   4    7.50    4.10
  11   2  -4   10.40    6.60
   2 -11  -4   12.40    8.70
 -11  -2   4   18.00    5.00
  -2  11   4   17.00    4.90
  11   2   4   24.30    5.20
   2 -11   4   14.40    5.10
   1 -11  -4    9.30    7.70
  11   1  -4    4.40    5.80
   1 -11   4    2.00    4.40
  11   1   4    3.20    4.60
  -1  11   4    2.90    3.80
  11   1   4    0.60    3.40
 -11  -1   4    4.50    3.40
   0 -11  -4   20.20    7.90
  11   0  -4    7.50    6.20
 -11   0   4    8.00    3.80
   0 -11   4    6.50    5.00
  11   0   4   12.80    3.60
   0  11   4   20.90    5.60
  11   0   4    9.50    4.00
  11  -1  -4   -7.90    5.00
  -1 -11  -4   -1.40    6.90
  11  -1   4   -5.30    3.10
  11  -1   4    0.10    2.60
 -11   1   4   -1.70    2.80
  -1 -11   4    5.10    4.10
   1  11   4    2.70    4.00
  11  -2  -4   -0.50    5.40
  -2 -11  -4   -4.40    6.60
 -11   2   4    0.00    3.00
  11  -2   4   -0.20    3.30
  -2 -11   4    2.60    3.60
  11  -2   4    0.80    2.60
  11  -3  -4   36.50    8.00
  -3 -11  -4   52.29   10.60
  11  -3   4   35.10    5.30
  -3 -11   4   34.20    6.40
 -11   3   4   24.50    5.20
  11  -4  -4   -2.50    5.80
  -4 -11  -4   28.90    9.30
  -4 -11   4    0.50    4.30
  11  -4   4    3.10    3.10
 -11   4   4    2.20    3.40
  -5 -11  -4  335.37   25.00
  11  -5  -4  285.17   21.40
  -5 -11   4  309.57   20.40
 -11   5   4  329.27   19.20
  11  -5   4  323.97   17.20
  11  -6  -4   14.00    7.00
  -6 -11  -4   12.50    9.20
 -11   6   4    2.20    3.10
  11  -6   4    2.30    2.90
  -6 -11   4    1.10    4.00
  11  -7  -4  105.99   14.20
  -7 -11  -4   96.79   15.00
 -11   7   4  108.79   10.20
  11  -7   4  111.19    8.30
  -7 -11   4  123.99   12.40
  11  -8  -4   25.50    8.90
  11  -8   4   20.00    3.70
   8  11   4   24.90    7.00
 -11   8   4   23.60    5.30
  -8 -11   4   24.20    6.40
  11  -9  -4   41.50    9.80
  11  -9   4   45.30    5.90
   9  11   4   53.89    8.50
 -11   9   4   54.29    8.10
  -9 -11   4   48.80    8.40
  11 -10  -4   14.70    8.50
 -11  10   4    6.30    4.50
 -10 -11   4    6.50    4.80
  10  11   4   13.50    6.10
  11 -11  -4  164.28   18.60
 -11  11   4  148.69   13.30
  11  11   4  193.58   15.30
  11 -12  -4    3.50    8.70
  12  11   4    8.40    5.60
  10 -12  -4    7.70    8.50
 -10  12   4    2.90    4.10
 -12 -10   4    2.60    6.10
  12  10   4   10.50    5.70
   9 -12  -4    5.50    8.60
 -12  -9   4    7.00    5.40
  12   9   4   18.80    6.20
  -9  12   4    5.90    4.40
   8 -12  -4    3.80    7.80
  12   8   4   17.80    5.70
  -8  12   4    6.70    4.20
 -12  -8   4   -0.30    5.00
  12   7  -4   -3.70    4.60
   7 -12  -4    1.80    7.60
  -7  12   4    7.70    4.80
  12   7   4   17.80    5.60
 -12  -7   4    4.60    5.20
   6 -12  -4   -1.80    6.60
  12   6  -4   22.70    5.60
  -6  12   4    6.10    4.10
  12   6   4    7.60    5.00
 -12  -6   4    7.10    4.70
   5 -12  -4   18.80    8.40
  12   5  -4   12.70    7.50
 -12  -5   4   20.10    5.40
  12   5   4   33.60    6.20
  -5  12   4   24.00    6.00
  12   4  -4   -1.80    6.00
   4 -12  -4    1.30    7.00
  12   4   4   10.20    4.50
 -12  -4   4    5.20    3.80
   3 -12  -4   -6.10    6.60
  12   3  -4   -4.10    5.40
   3 -12   4    0.10    3.30
 -12  -3   4   -1.30    3.10
  -3  12   4    1.80    3.70
  12   3   4    8.80    4.00
   2 -12  -4    2.20    8.00
  12   2  -4  -10.20    5.00
   2 -12   4   -1.60    3.70
  -2  12   4   -3.80    3.60
  12   2   4   -1.90    3.20
 -12  -2   4   -2.50    3.00
   1 -12  -4    4.40    7.90
  12   1  -4   -5.80    5.50
 -12  -1   4   -1.20    3.00
  12   1   4    2.00    3.70
  -1  12   4    2.20    4.60
   1 -12   4   -4.70    3.90
  12   0  -4   -5.00    5.50
   0 -12  -4   -0.90    7.20
   0 -12   4   -6.00    3.90
 -12   0   4    1.40    3.40
   0  12   4    6.50    4.70
  12   0   4    1.10    3.70
  12  -1  -4   -2.60    5.70
  12  -1   4    1.80    3.70
  -1 -12   4    9.00    4.60
 -12   1   4   -1.60    3.20
  -2 -12  -4   -7.70    7.10
  12  -2  -4   -7.40    5.80
  12  -2   4   -7.40    3.10
  -2 -12   4    6.50    4.00
 -12   2   4   -3.00    2.70
  12  -3  -4   -9.80    5.20
  -3 -12  -4   -9.60    6.90
  12  -3   4    1.20    3.20
  -3 -12   4    0.70    3.70
 -12   3   4    1.40    3.10
  12  -4  -4   -0.90    5.80
  -4 -12  -4   -9.40    8.20
  12  -4   4   -0.60    2.90
 -12   4   4   -0.70    2.90
  -4 -12   4   -0.70    4.10
  -5 -12  -4  -17.10    7.70
  12  -5  -4  -11.20    5.50
  -5 -12   4   -0.40    4.20
  12  -5   4   -0.90    3.00
 -12   5   4   -3.80    2.90
  12  -6  -4   -6.70    6.00
  -6 -12  -4   -3.20    9.00
  12  -6   4   -1.30    2.80
  -6 -12   4    2.90    5.10
 -12   6   4   -1.30    3.20
  12  -7  -4   16.00    7.70
  -7 -12  -4    6.20    9.40
  -7 -12   4    5.70    4.70
 -12   7   4    6.70    3.80
  12  -7   4   -0.30    2.80
  12  -8  -4   -2.60    6.80
  -8 -12   4    3.20    4.50
   8  12   4   -7.60    4.80
 -12   8   4    3.10    3.70
  12  -8   4    1.00    2.80
  12  -9  -4    3.40    7.00
 -12   9   4    5.80    4.70
   9  12   4   -0.80    5.40
  -9 -12   4    3.70    5.30
  12  -9   4   -1.10    3.00
  12 -10  -4   -0.30    7.20
  10  12   4   -1.60    5.40
 -12  10   4    2.50    4.00
  12 -11  -4    6.40    8.00
  11  12   4    8.20    6.10
  12 -12  -4   -1.10    8.10
  12  12   4    3.90    5.80
  12 -13  -4   -2.20    8.50
  13  12   4    7.50    6.10
  11 -13  -4    3.40    8.60
  13  11   4    7.00    6.00
  10 -13  -4   -0.50    8.60
 -10  13   4    4.30    7.00
  13  10   4   -8.30    4.80
   9 -13  -4    6.40    9.20
  13   9   4    5.90    5.80
  -9  13   4   12.80    4.50
 -13  -9   4   10.70    7.20
  13   8  -4   -5.70    4.50
   8 -13  -4   -4.70    7.70
 -13  -8   4    6.90    5.70
  13   8   4    5.30    5.40
  -8  13   4   17.30    5.00
   7 -13  -4  202.98   19.70
  -7  13   4  196.38   15.40
 -13  -7   4  217.08   16.70
  13   7   4  200.08   15.00
   6 -13  -4   -1.60    7.40
  13   6  -4    3.50    5.30
 -13  -6   4    3.30    4.60
  -6  13   4    3.10    4.30
  13   6   4    6.50    4.70
   5 -13  -4  290.77   22.80
  13   5  -4  253.97   19.40
  -5  13   4  297.97   19.30
 -13  -5   4  295.17   19.40
  13   5   4  280.97   18.00
   4 -13  -4   -6.40    7.00
  13   4  -4   13.10    6.80
  13   4   4    5.10    4.40
  -4  13   4    4.20    4.50
   4 -13   4    2.60    4.30
 -13  -4   4   -1.70    3.50
  13   3  -4   -2.40    5.50
   3 -13  -4   -8.00    7.40
 -13  -3   4    2.50    3.80
  -3  13   4    3.10    4.50
  13   3   4   -1.90    3.80
   3 -13   4   -2.10    3.60
  13   2  -4    2.10    6.20
   2 -13  -4    3.50    7.80
  -2  13   4    8.10    5.00
 -13  -2   4    0.20    3.20
   2 -13   4    4.60    4.60
  13   2   4    3.80    4.10
  13   1  -4  159.08   15.50
   1 -13  -4  148.39   17.80
   1 -13   4  146.49   13.40
 -13  -1   4  158.18   12.90
  -1  13   4  165.98   14.40
  13   1   4  158.48   12.00
   0 -13  -4   15.50    8.60
  13   0  -4   -1.60    6.80
  13   0   4    6.70    4.50
 -13   0   4    9.90    4.60
   0 -13   4   -4.50    5.20
   0  13   4    9.40    5.60
  -1 -13  -4   53.19   11.30
  13  -1  -4   48.80    9.90
  13  -1   4   56.79    7.10
  -1 -13   4   61.59    8.80
   1  13   4   63.39    9.50
 -13   1   4   61.19    8.10
  -2 -13  -4    5.80    8.50
  13  -2  -4   -4.70    6.20
 -13   2   4    0.10    3.10
  -2 -13   4    6.20    4.70
  13  -2   4    3.20    3.70
  -3 -13  -4   11.40    9.30
  13  -3  -4    9.40    7.50
  13  -3   4   18.00    4.70
  -3 -13   4   13.30    5.20
 -13   3   4   14.90    4.70
  -4 -13  -4   21.80   10.90
  13  -4  -4   20.30    8.30
  13  -4   4   32.00    5.10
  -4 -13   4   34.00    7.20
 -13   4   4   24.20    5.30
  -5 -13  -4   28.80   11.90
  13  -5  -4   40.80    9.50
  13  -5   4   42.60    5.70
 -13   5   4   49.00    7.50
  -5 -13   4   44.20    8.00
  -6 -13  -4    4.00   10.10
  13  -6  -4   16.30    7.80
 -13   6   4   16.90    5.00
  13  -6   4   18.30    4.20
  -6 -13   4   17.60    6.70
  -7 -13  -4   19.70   10.50
  13  -7  -4   16.80    8.00
 -13   7   4   14.30    4.90
  13  -7   4   13.80    3.90
  -7 -13   4   13.10    7.20
  13  -8  -4   20.10    8.80
   8  13   4   -3.40    5.50
  13  -8   4    2.40    3.20
 -13   8   4    3.30    3.80
  13  -9  -4   12.80    8.30
 -13   9   4    8.30    4.60
   9  13   4   11.00    6.50
  13  -9   4    9.20    3.80
  13 -10  -4   13.40    8.60
  10  13   4    3.80    5.60
  13 -11  -4    2.10    8.70
  11  13   4    6.50    6.00
  13 -12  -4    7.00    9.00
  12  13   4   12.70    6.60
  13 -13  -4    1.00    8.80
  13  13   4    1.10    5.80
  13 -14  -4  -12.60    8.70
  14  13   4   -0.90    5.80
  12 -14  -4    9.70    9.30
  14  12   4    0.50    5.60
  11 -14  -4    6.30    9.00
  14  11   4   10.20    6.20
  10 -14  -4    4.50    8.70
  14  10   4    2.40    5.30
   9 -14  -4   -3.10    7.60
  14   9   4   -2.40    5.00
   8 -14  -4    3.50    8.50
  14   8  -4   -1.90    5.10
  14   8   4    5.60    5.30
  -8  14   4    7.00    5.00
 -14  -8   4   17.10    8.20
   7 -14  -4    9.30    8.20
  14   7  -4    0.30    5.30
  14   7   4   11.20    5.60
 -14  -7   4    9.20    5.20
  -7  14   4   11.30    5.40
  14   6  -4   27.50    7.20
   6 -14  -4   -4.00    7.50
  14   6   4   -3.50    4.40
  -6  14   4    1.00    4.40
 -14  -6   4   -0.70    4.10
  14   5  -4    4.60    6.00
   5 -14  -4   -3.90    7.40
 -14  -5   4   -1.00    3.70
  14   5   4    4.40    4.70
  -5  14   4    4.30    4.70
  14   4  -4   -1.70    5.80
   4 -14  -4   -9.50    7.20
 -14  -4   4    0.90    4.10
  -4  14   4    3.00    4.30
  14   4   4    4.40    4.50
   3 -14  -4    5.60    8.70
  14   3  -4    3.00    6.30
 -14  -3   4    5.50    4.50
  -3  14   4    9.10    5.10
  14   3   4    6.80    4.60
  14   2  -4   -0.20    6.20
   2 -14  -4   -9.30    7.80
  -2  14   4    1.00    5.20
 -14  -2   4   -2.40    3.60
  14   2   4    1.70    4.20
  14   1  -4   -2.30    6.40
   1 -14  -4    2.80    8.30
  -1  14   4    0.40    4.90
  14   1   4    2.90    4.30
 -14  -1   4    6.00    4.60
  14   0  -4   -9.60    6.80
   0 -14  -4    7.60    8.20
   0  14   4   -2.80    4.40
 -14   0   4    0.80    3.80
  14   0   4   -1.20    3.80
  -1 -14  -4   27.50    9.60
  14  -1  -4   -9.80    6.60
  14  -1   4   -0.50    3.70
 -14   1   4    3.90    3.90
  -1 -14   4   24.80    7.70
  -3 -14  -4    8.90    9.20
  14  -3  -4    5.60    7.50
  14  -3   4    4.40    4.20
 -14   3   4    6.20    3.90
  14  -4  -4    3.70    7.20
  -4 -14  -4   -1.20    9.10
 -14   4   4    5.70    4.10
  14  -4   4    8.00    4.00
  14  -5  -4    0.50    7.00
  -5 -14  -4   -4.60    9.30
  14  -5   4    6.80    3.80
 -14   5   4    4.90    4.00
  14  -6  -4   -0.10    6.70
  -6 -14  -4  -10.00    9.10
 -14   6   4   -0.30    3.60
  14  -6   4    0.50    3.30
  14  -7  -4   -0.90    7.20
 -14   7   4    2.80    4.10
  14  -7   4    2.90    3.30
  14  -8  -4   -2.40    7.50
  14  -8   4    1.80    3.50
   8  14   4    2.10    5.80
  14  -9  -4    6.90    8.30
  14  -9   4    3.30    3.90
   9  14   4    1.40    5.60
  14 -10  -4   -2.30    8.10
  10  14   4   10.20    6.20
  14 -11  -4   -9.20    7.90
  11  14   4    7.90    6.10
  14 -12  -4  -10.90    7.80
  12  14   4    4.90    6.00
  14 -13  -4   -1.30    9.20
  13  14   4    0.60    6.10
  14 -14  -4   -3.40    9.10
  14  14   4   -8.40    5.70
  14 -15  -4    7.90    9.80
  15  14   4   -3.30    6.00
  13 -15  -4   42.60   12.70
  15  13   4   49.80    9.40
  12 -15  -4   -3.50    9.00
  15  12   4    4.20    6.10
  11 -15  -4   53.49   12.90
  15  11   4   62.99    9.90
  10 -15  -4    3.60    8.30
  15  10   4    4.60    5.70
   9 -15  -4   14.30    9.20
  15   9   4    7.20    5.90
  15   8  -4    7.00    6.40
   8 -15  -4   26.40   10.30
  15   8   4   19.70    6.50
  15   7  -4   11.40    6.80
   7 -15  -4   19.30    9.60
  15   7   4   18.80    6.50
  15   6  -4    5.70    6.40
   6 -15  -4    6.20    8.80
  15   6   4    1.50    5.00
  -6  15   4    7.20    6.10
 -15  -6   4    3.70    4.40
   5 -15  -4   21.90    9.90
  15   5  -4   16.40    7.40
  15   5   4   16.40    6.00
 -15  -5   4   20.60    6.40
  -5  15   4   13.40    6.20
   4 -15  -4    0.40    8.20
  15   4  -4   -9.70    5.20
  15   4   4   -1.80    4.30
  -4  15   4    1.90    4.50
 -15  -4   4   -3.50    4.10
  15   3  -4   -2.90    6.00
   3 -15  -4    0.80    8.00
 -15  -3   4   -1.40    3.90
  15   3   4   -6.80    4.50
  -3  15   4   -0.50    4.90
  15   2  -4   -1.70    6.30
   2 -15  -4   -5.00    7.70
 -15  -2   4   -2.00    3.80
  -2  15   4    0.00    5.30
  15   2   4    3.00    4.50
  15   1  -4  102.89   13.70
   1 -15  -4  107.29   15.30
 -15  -1   4  108.99   11.50
  -1  15   4  114.19   13.50
  15   1   4  107.59   10.80
  15   0  -4   -6.30    6.60
   0 -15  -4    4.00    8.30
   0  15   4    1.90    5.10
 -15   0   4    3.50    4.40
  15   0   4    0.50    4.10
  15  -1  -4   32.10    8.90
  -1 -15  -4   38.30   11.00
 -15   1   4   28.80    6.40
  15  -1   4   29.40    6.00
  15  -2  -4   -0.80    7.10
  -2 -15  -4    5.00    9.50
 -15   2   4   -0.70    3.50
  15  -2   4   -2.00    3.80
  15  -3  -4   92.89   13.30
  -3 -15  -4  117.49   16.50
  15  -3   4   96.99    9.70
 -15   3   4  103.39   10.50
  -4 -15  -4   22.10   10.60
  15  -4  -4   27.80    9.30
 -15   4   4   20.40    5.70
  15  -4   4   35.80    5.80
  -5 -15  -4  357.06   27.90
  15  -5  -4  337.87   24.40
  15  -5   4  329.07   19.00
 -15   5   4  329.07   21.70
  -6 -15  -4   18.60   10.80
  15  -6  -4    1.70    7.70
  15  -6   4    1.40    3.60
  15  -7  -4   24.60    9.70
  15  -7   4   19.10    4.70
  15  -8  -4   10.40    8.70
  15  -8   4   16.80    4.50
   8  15   4   23.10    7.30
  15  -9  -4   55.09   12.80
  15  -9   4   79.19   11.50
   9  15   4   92.79   12.20
  15 -10  -4    9.10    8.80
  10  15   4    4.30    6.30
  15 -11  -4   13.00    9.50
  11  15   4   18.30    7.20
  15 -12  -4    6.10    9.70
  12  15   4    6.30    6.60
  15 -13  -4    3.20    9.20
  13  15   4   -2.00    6.20
  15 -14  -4   -2.80    9.30
  14  15   4   -2.00    5.80
  13 -16  -4   20.10   11.00
  16  13   4   -0.30    6.10
  12 -16  -4    2.20   10.10
  16  12   4   -3.30    5.90
  11 -16  -4    7.60    9.50
  16  11   4    0.30    5.70
  10 -16  -4    0.90    9.10
  16  10   4    2.00    5.80
   9 -16  -4    4.60    8.80
  16   9   4    7.50    6.00
   8 -16  -4    7.90    9.20
  16   8  -4   -4.20    6.00
  16   8   4    3.40    5.60
  16   7  -4    7.80    7.50
   7 -16  -4   22.20    9.60
  16   7   4   16.50    6.50
   6 -16  -4  -10.80    7.90
  16   6  -4   -7.70    6.30
  16   6   4    1.30    5.30
   5 -16  -4    4.50    8.60
  16   5  -4   -3.90    6.20
  16   5   4    1.90    5.00
  16   4  -4    0.40    6.40
   4 -16  -4    1.00    8.10
  16   4   4    3.10    4.90
   3 -16  -4    9.50    9.30
  16   3  -4   24.50    8.40
  16   3   4   11.10    5.40
 -16  -3   4   17.90    6.40
   2 -16  -4  -11.40    7.90
  16   2  -4    2.70    7.00
  16   2   4   -4.20    4.10
 -16  -2   4    0.30    4.10
   1 -16  -4   -2.70    8.40
  16   1  -4    2.10    6.90
  16   1   4   -3.90    4.00
 -16  -1   4    3.00    4.80
   0 -16  -4   -6.40    8.30
  16   0  -4    6.10    7.20
  16   0   4   -2.80    3.90
 -16   0   4    1.40    4.40
  16  -1  -4  -10.50    6.90
  -1 -16  -4    7.60    9.10
  16  -1   4   -0.80    4.00
 -16   1   4    1.30    5.60
  -2 -16  -4   -6.60    8.60
  16  -2  -4    9.90    7.70
  16  -2   4    1.60    4.20
  -3 -16  -4    6.60    9.50
  16  -3  -4   -6.40    6.30
  16  -3   4   -4.00    3.80
  -4 -16  -4    1.10    9.40
  16  -4  -4    3.50    7.60
  16  -4   4   -1.00    4.00
  -5 -16  -4    3.30    9.70
  16  -5  -4    1.30    7.60
  16  -5   4    2.10    4.00
  -6 -16  -4   18.50   10.80
  16  -6  -4    6.90    8.00
  16  -6   4   -0.70    3.80
  16  -7  -4   -4.10    7.40
  16  -7   4   -2.70    3.90
   7  16   4    5.30    6.10
  16  -8  -4    5.10    8.00
   8  16   4   12.40    6.70
  16  -8   4    3.80    4.10
  16  -9  -4    0.70    8.80
   9  16   4    3.90    6.90
  16 -10  -4   -3.50    8.70
  10  16   4    4.30    6.70
  16 -11  -4    0.30    8.80
  11  16   4   -2.90    6.20
  16 -12  -4   -2.00    8.80
  12  16   4    1.60    6.90
  16 -13  -4   13.10   10.20
  13  16   4    0.30    6.50
  12 -17  -4    3.90   10.10
  11 -17  -4   36.00   12.20
  17  11   4   24.20    7.80
  10 -17  -4   19.20   11.10
  17  10   4    5.50    6.10
   9 -17  -4   51.49   13.10
  17   9   4   59.29    9.90
  17   8  -4   17.10    7.90
   8 -17  -4   21.80   10.70
  17   8   4   30.60    7.60
   7 -17  -4  253.97   23.30
  17   7  -4  198.18   19.20
  17   7   4  246.68   17.80
  17   6  -4   -2.40    6.60
   6 -17  -4   10.20    9.70
  17   6   4    8.00    5.60
  17   5  -4   -0.30    7.00
   5 -17  -4    5.00    9.40
  17   5   4    7.90    5.60
   4 -17  -4   10.90    9.90
  17   4  -4    9.80    7.30
  17   4   4    6.60    5.40
   3 -17  -4   44.60   12.30
  17   3  -4   52.79   10.60
  17   3   4   51.69    8.00
   2 -17  -4   -2.60    9.00
  17   2  -4    0.50    7.10
  17   2   4    3.10    4.80
   1 -17  -4   -4.50    8.80
  17   1  -4    1.70    7.20
  17   1   4   -3.20    4.10
   0 -17  -4    1.10    9.50
  17   0  -4    0.00    7.20
  17   0   4    3.40    4.50
  17  -1  -4   -6.70    6.70
  -1 -17  -4   -4.80    9.50
  17  -1   4    2.00    4.30
  17  -2  -4    7.20    8.40
  -2 -17  -4   -4.80    9.40
  17  -2   4    1.10    4.50
  -3 -17  -4   17.00   11.40
  17  -3  -4   20.50    9.20
  17  -3   4   15.70    5.40
  -4 -17  -4    4.40   10.90
  17  -4  -4    0.10    7.80
  17  -4   4    4.30    4.40
  -5 -17  -4   26.70   12.10
  17  -5  -4   35.60   10.30
  17  -5   4   26.20    5.70
  17  -6  -4   -3.10    7.40
  17  -6   4   -3.30    3.90
  17  -7  -4   -2.10    8.40
  17  -7   4    2.40    4.20
   7  17   4    2.80    5.90
  17  -8  -4    1.30    8.80
  17  -8   4    1.30    4.20
   8  17   4    7.50    6.60
  17  -9  -4   55.19   13.50
   9  17   4   82.39   11.90
  17 -10  -4   -3.10    8.60
  10  17   4    0.00    6.50
  17 -11  -4   35.80   11.60
  11  17   4   33.90    9.00
  17 -12  -4    3.10    9.30
  10 -18  -4    1.60    9.60
  18  10   4    1.80    5.80
   9 -18  -4    6.50    9.80
  18   9   4    5.00    6.20
  18   8  -4   -5.30    7.50
   8 -18  -4    2.80    9.70
  18   8   4    8.80    6.20
  18   7  -4    9.60    7.80
   7 -18  -4   -4.30    9.00
  18   7   4    5.90    6.00
  18   6  -4    0.40    7.20
   6 -18  -4   -0.80    9.20
  18   6   4   -1.90    5.20
  18   5  -4    5.60    7.80
   5 -18  -4   10.90   10.10
  18   5   4    8.40    5.80
  18   4  -4    4.10    7.40
   4 -18  -4   -1.00    9.00
  18   4   4   -1.40    5.10
  18   3  -4   -3.90    7.00
   3 -18  -4    3.90    9.60
  18   3   4   -0.50    4.60
  18   2  -4   -7.80    6.40
   2 -18  -4    4.30    9.70
  18   2   4    0.60    4.60
  18   1  -4    1.00    7.80
   1 -18  -4   -5.40    9.10
  18   1   4    5.90    4.90
   0 -18  -4   -5.00    9.50
  18   0  -4   -9.80    6.60
  18   0   4    0.80    4.60
  -1 -18  -4   -3.30   10.20
  18  -1  -4    3.40    7.50
  18  -1   4    1.20    4.60
  18  -2  -4   -8.90    6.60
  -2 -18  -4    1.50   10.20
  18  -2   4    2.70    4.50
  -3 -18  -4   13.30   10.60
  18  -3  -4   11.50    8.70
  18  -3   4    0.60    4.50
  18  -4  -4  -10.10    8.40
  -4 -18  -4  -11.90   10.00
  18  -4   4   -2.90    4.30
  18  -5  -4   -5.60    8.60
  -5 -18  -4   -3.40   10.80
  18  -5   4    1.60    4.50
  18  -6  -4   -2.20    8.40
  18  -6   4   -2.40    4.30
  18  -7  -4   -2.40    8.50
  18  -7   4    6.20    4.90
   7  18   4   34.20    8.10
  18  -8  -4   -3.20    8.80
   8  18   4   -0.70    6.40
  18  -8   4    0.60    4.60
  18  -9  -4   14.30   10.10
   9  18   4   11.50    7.30
  18 -10  -4    8.00    9.70
  10  18   4   -0.20    6.40
   8 -19  -4    2.30    9.90
  19   8   4    0.80    5.50
  19   7  -4   42.00   10.50
   7 -19  -4   34.30   12.20
  19   7   4   55.19    9.20
  19   6  -4    7.30    7.70
   6 -19  -4   -6.20    8.70
  19   6   4    0.10    5.20
  19   5  -4    1.90    7.90
   5 -19  -4    3.70    9.40
  19   5   4   14.60    6.10
  19   4  -4    3.90    8.30
   4 -19  -4    8.50   10.80
  19   4   4   16.50    6.30
   3 -19  -4  142.79   18.40
  19   3  -4  103.59   15.50
  19   3   4  122.39   12.50
   2 -19  -4   28.10   11.40
  19   2  -4    8.90    8.30
  19   2   4   10.60    5.90
  19   1  -4   54.29   12.10
   1 -19  -4   51.49   13.50
  19   1   4   71.29    9.30
  19   0  -4   -3.20    8.00
   0 -19  -4    4.00   10.50
  19   0   4    3.40    5.00
  19  -1  -4   26.90   10.00
  -1 -19  -4   41.40   12.80
  19  -1   4   27.40    6.40
  19  -2  -4    5.80    8.60
  -2 -19  -4   36.10   12.20
  19  -2   4   15.80    5.80
  19  -3  -4   62.59   13.10
  -3 -19  -4   93.59   16.30
  19  -3   4   83.89   10.20
  19  -4  -4    9.60    9.00
  -4 -19  -4    0.10   10.90
  19  -4   4    7.30    5.10
  -5 -19  -4   -3.40   10.80
  19  -5  -4   18.30   10.30
  19  -5   4   17.10    5.90
  19  -6  -4    4.00    9.40
   6  19   4    1.60    6.20
  19  -6   4    5.50    5.00
  19  -7  -4   -3.30    8.60
   7  19   4    1.30    6.40
  19  -7   4    1.80    4.70
  19  -8  -4   12.60    9.80
   8  19   4   -1.60    6.50
  19  -8   4    3.30    5.00
  20   5  -4    4.80    7.50
   5 -20  -4   -2.90   12.20
  20   5   4    5.80    5.70
  20   4  -4    6.60    8.30
   4 -20  -4   22.30   12.60
  20   4   4    2.50    5.20
   3 -20  -4    7.70   10.90
  20   3  -4    4.90    8.40
  20   3   4   -0.60    5.20
  20   2  -4    0.00    8.20
   2 -20  -4    8.10   10.60
  20   2   4   -3.20    5.20
   1 -20  -4    5.90   11.10
  20   1  -4   -1.30    7.90
  20   1   4   -1.80    5.00
   0 -20  -4    4.50   11.00
  20   0  -4    0.30    8.50
  20   0   4    3.50    5.10
  -1 -20  -4    8.80   11.00
  20  -1  -4    0.50    8.70
  20  -1   4    3.00    5.10
  20  -2  -4    4.50    8.60
  -2 -20  -4   -6.00   10.50
  20  -2   4    2.70    5.10
  20  -3  -4   -1.80    8.20
  -3 -20  -4   14.10   12.50
  20  -3   4    2.10    4.80
  -4 -20  -4   18.50   13.30
  20  -4  -4    6.10    9.00
  20  -4   4   -4.70    4.80
  20  -5  -4    3.80    9.40
  20  -5   4   -0.80    4.80
   0   0  -5   -2.90    6.40
   1   0  -5   46.90    9.60
   0  -1  -5   75.59   11.50
  -1   0  -5   56.29   10.70
   0   1  -5   63.99   10.30
   1   1  -5  144.39   15.20
   1  -1  -5  153.38   15.50
  -1  -1  -5  153.48   16.00
  -1   1  -5  143.99   15.40
   1  -2  -5  119.39   15.40
   0   2  -5   10.40    7.20
  -2   1  -5   16.90    7.90
  -1  -2  -5   11.60    8.50
   2  -1  -5   14.20    7.20
   2  -2  -5  175.98   16.70
  -2   2  -5  195.28   16.70
   2   2  -5  191.68   16.10
  -2  -2  -5  202.38   18.00
  -3  -2  -5   72.89   11.30
  -2   3  -5   93.39   11.80
   3   2  -5   78.89   10.30
   2  -3  -5   87.19   12.00
  -2   3   5   88.39    6.90
  -3  -1  -5   34.70    9.40
  -1   3  -5   53.89    9.20
   1  -3  -5   60.99   11.40
   3   1  -5   54.19    8.80
   3   0  -5  114.09   13.50
   0  -3  -5  125.39   15.10
   0   3  -5  133.39   14.20
  -3   0  -5  152.38   16.50
  -3   0   5  127.89    8.40
  -3   1  -5   -6.20    7.20
   1   3  -5   -4.70    5.80
   3  -1  -5   -2.70    5.30
  -1  -3  -5   36.70    8.50
  -3   1   5    0.30    2.10
  -3   2  -5   16.60    8.00
   3  -2  -5   20.90    7.40
   2   3  -5   23.30    7.30
  -2  -3  -5   17.40    7.90
  -3   2   5   20.40    3.40
  -3  -3  -5    9.70    7.80
  -3   3  -5    7.70    6.30
   3  -3  -5    5.90    6.70
   3   3  -5    0.40    5.70
  -3  -3   5    3.50    3.00
  -3   3   5    7.40    2.90
  -4  -3  -5   91.39   12.80
  -3   4  -5   55.79    9.70
   4   3  -5   78.19    9.90
  -4  -3   5   66.89    6.90
   4   2  -5  111.59   13.00
   2  -4  -5  114.19   15.20
  -4  -2  -5  155.58   16.30
  -2   4  -5   97.39   12.70
  -4  -2   5  119.19    8.60
  -2   4   5  122.49    8.40
   1  -4  -5   35.30    9.90
  -4  -1  -5   13.10    8.10
   4   1  -5   17.10    6.80
  -1   4  -5   14.80    7.00
  -4  -1   5   12.30    3.20
   0   4  -5    1.60    5.90
   0  -4  -5   -1.30    7.70
   4   0  -5    2.50    5.60
  -4   0  -5   10.70    7.90
   0   4   5    3.90    2.60
  -4   0   5    3.20    2.50
  -1  -4  -5   -5.60    7.40
  -4   1  -5    6.00    7.10
   4  -1  -5    7.10    6.30
  -4   1   5    6.60    2.60
   2   4  -5  225.58   15.80
  -4   2  -5  186.88   16.90
   4  -2  -5  184.88   16.30
  -2  -4  -5  162.08   17.80
  -4   2   5  186.08   11.30
   4  -3  -5   17.40    7.60
  -4   3  -5   21.60    7.90
  -3  -4  -5   11.70    8.20
   3   4  -5   16.90    6.80
  -3  -4   5   26.40    5.00
  -4   3   5   18.20    3.90
   4   4  -5   35.90    7.70
   4  -4  -5   26.20    8.50
  -4  -4  -5   33.00    9.50
  -4  -4   5   48.30    6.50
  -4   4   5   29.50    4.60
   5   4  -5   90.99   11.50
   4  -5  -5   50.99    9.40
  -5  -4  -5   49.99   10.70
  -5  -4   5   56.79    7.90
  -4   5   5   52.19    6.30
   4  -5   5   56.79    6.60
  -5  -3  -5   71.89   11.90
  -3   5  -5  102.89   12.50
   5   3  -5  119.89   12.20
   3  -5  -5   79.09   11.50
  -5  -3   5   88.39    8.00
  -3   5   5   71.99    7.30
  -5  -2  -5   18.00    8.10
   2  -5  -5   18.30    8.20
   5   2  -5   31.30    7.20
  -2   5  -5   18.50    7.10
  -2   5   5   21.00    4.20
  -5  -2   5   21.50    4.20
  -5  -1  -5   90.39   12.60
   1  -5  -5   92.89   13.50
   5   1  -5   81.19   10.70
  -1   5  -5   73.29   10.40
  -1   5   5   85.59    7.70
  -5  -1   5   80.79    7.20
  -5   0  -5   66.49   10.70
   0   5  -5   59.09    9.00
   5   0  -5   49.99    9.00
   0  -5  -5   52.89   10.90
  -5   0   5   41.70    5.40
   0   5   5   61.99    6.60
  -1  -5  -5   44.50    9.50
   5  -1  -5   -0.70    6.30
  -5   1  -5   13.30    8.00
   1   5   5   17.60    3.40
   2   5  -5   26.30    7.20
  -2  -5  -5   33.90    9.00
   5  -2  -5   42.70    9.10
  -5   2  -5   38.20    9.80
  -5   2   5   36.40    4.80
   5  -3  -5   33.90    8.10
   3   5  -5   19.10    6.50
  -3  -5  -5   15.20    7.90
  -5   3   5   18.60    3.80
  -3  -5   5   19.60    4.30
   5  -3   5   16.50    4.40
   5  -4  -5   68.89   10.20
  -4  -5  -5   56.29   11.50
   4   5  -5   89.09   10.70
   5  -4   5   48.90    6.60
  -5   4   5   56.49    6.80
  -4  -5   5   68.19    7.50
   5   5  -5    5.80    5.10
   5  -5  -5    3.20    6.40
  -5  -5  -5    3.70    7.90
  -5  -5   5   -4.00    3.80
   5  -5   5   -0.10    2.80
  -5   5   5    0.20    2.50
   5  -6  -5  128.59   15.90
   6   5  -5  156.18   13.30
  -6  -5  -5  150.28   17.80
  -6  -5   5  157.48   12.30
   5  -6   5  132.09    9.30
  -5   6   5  139.09   10.30
   6   4  -5  168.48   14.50
  -6  -4  -5  160.58   17.60
   4  -6   5  168.98   10.80
  -4   6   5  181.78   11.70
  -6  -4   5  186.08   13.20
   6   3  -5   92.19   12.40
   3  -6  -5  115.39   13.60
  -6  -3  -5  105.49   14.30
   3  -6   5   95.89    8.00
  -3   6   5  112.49    9.10
  -6  -3   5  121.49    9.40
   6   2  -5   -0.60    5.20
   2  -6  -5    5.10    7.50
  -6  -2  -5    6.20    7.70
  -2   6  -5   -3.40    5.60
  -2   6   5   -0.90    3.30
  -6  -2   5    2.10    2.60
   1  -6  -5   -1.30    8.80
   6   1  -5    7.60    6.40
  -6  -1  -5    8.10    8.20
  -1   6  -5    7.70    5.70
  -1   6   5    6.40    3.30
  -6  -1   5    5.80    3.00
   0  -6  -5   31.90   10.20
   0   6  -5   57.89    8.40
  -6   0  -5   49.00   10.30
   6   0  -5   45.40    8.30
   0   6   5   48.80    6.70
  -6   0   5   36.50    5.20
   1   6  -5  138.39   12.10
   6  -1  -5  110.49   13.50
  -1  -6  -5  131.49   15.50
  -6   1   5  118.19    8.90
   6  -1   5  103.39    9.70
   1   6   5  116.49    9.30
   6  -2  -5   -2.60    5.60
   2   6  -5    5.20    5.40
  -2  -6  -5   -4.40    6.80
  -6   2   5    0.30    2.60
  -2  -6   5    6.20    3.30
   6  -2   5    3.00    3.50
   2   6   5    1.40    3.20
   6  -3  -5   17.50    7.70
  -3  -6  -5   17.80    8.30
   3   6  -5   29.70    6.60
  -6   3   5   26.60    4.50
  -3  -6   5   29.40    5.00
   6  -3   5   31.30    5.20
  -4  -6  -5   -6.00    7.70
   6  -4  -5   15.20    7.00
   4   6  -5   -3.80    5.00
  -6   4   5    0.20    2.90
  -4  -6   5   -3.50    2.80
   6  -4   5    4.10    3.10
   5   6  -5    6.00    5.30
  -5  -6  -5   19.20    8.70
   6  -5  -5   30.80    8.30
  -5  -6   5    9.80    4.10
  -6   5   5    8.40    3.80
   6  -5   5    7.60    3.40
   6  -6  -5   94.89   12.60
   6   6  -5   89.09   10.70
  -6  -6  -5   83.69   13.40
  -6   6   5   69.59    7.80
  -6  -6   5   82.69    9.20
   6  -6   5   70.39    6.90
   7   6  -5   24.20    6.40
   6  -7  -5   14.70    7.60
  -7  -6  -5   -0.90    8.30
   6  -7   5    7.70    3.10
  -6   7   5   12.20    3.90
  -7  -6   5   19.00    5.80
  -7  -5  -5   12.50    8.80
   7   5  -5   13.10    5.50
   5  -7  -5    5.30    6.70
   5  -7   5   -1.30    2.50
  -7  -5   5    3.20    4.40
  -5   7   5    1.30    3.00
  -7  -4  -5   54.99   12.00
   4  -7  -5   75.99   11.70
   4  -7   5   70.29    6.10
  -7  -4   5   83.59    8.60
  -4   7   5   63.59    7.80
   7   3  -5   -4.90    5.10
   3  -7  -5   -9.50    5.80
  -7  -3  -5   -0.70    8.00
  -7  -3   5    2.70    3.30
   3  -7   5   -2.90    2.50
  -3   7   5   -0.50    3.20
   7   2  -5  138.19   13.50
   2  -7  -5  125.49   16.20
  -2   7   5  118.09   10.10
   2  -7   5  124.09    8.40
  -7  -2   5  135.89   10.10
   7   1  -5    3.30    6.20
  -1   7  -5   -5.00    5.80
   1  -7  -5   -2.40    8.40
   7   1   5   -1.60    4.00
  -1   7   5    8.10    3.80
  -7  -1   5    2.00    2.80
   0   7  -5    1.70    5.70
   7   0  -5   15.50    7.20
   0   7   5   22.40    4.40
  -7   0   5    9.50    3.20
   7  -1  -5   -6.80    6.20
   1   7  -5   23.70    6.10
  -1  -7  -5    1.20    7.40
   1   7   5    8.90    3.90
   7  -1   5   -8.00    3.20
  -7   1   5    1.70    2.50
   7  -2  -5   68.79   10.80
  -2  -7  -5   86.19   13.00
   2   7  -5   70.39    9.60
  -7   2   5   84.69    7.60
   2   7   5   88.69    8.60
   7  -2   5   79.59    8.30
  -2  -7   5   79.69    8.40
  -3  -7  -5   21.80    8.70
   7  -3  -5   30.30    8.10
   7  -3   5   34.10    5.20
  -7   3   5   28.70    4.90
   7  -4  -5   -0.70    6.30
  -4  -7  -5    7.60    8.60
   4   7  -5    4.70    5.00
   7  -4   5   -0.40    3.20
  -4  -7   5   12.20    3.80
  -7   4   5   -1.40    2.50
  -5  -7  -5   33.20   10.50
   5   7  -5   58.79    8.00
   7  -5  -5   41.30    9.10
  -7   5   5   40.70    6.10
   7  -5   5   42.50    5.40
  -5  -7   5   60.69    7.80
  -6  -7  -5   40.10   10.80
   7  -6  -5   44.80   10.10
   6   7  -5   48.50    7.40
  -6  -7   5   37.30    6.80
   7  -6   5   35.40    4.90
  -7   6   5   41.00    6.00
   7  -7  -5   26.10    9.00
   7   7  -5   11.90    5.50
  -7  -7  -5   17.60    9.60
   7  -7   5    6.00    2.90
  -7  -7   5   10.80    4.70
  -7   7   5   11.40    4.00
   7  -8  -5    6.60    7.50
   8   7  -5    3.60    5.10
  -8  -7   5   -3.30    4.40
  -7   8   5    3.30    3.30
   6  -8  -5  134.39   16.30
   8   6  -5  158.98   13.70
  -6   8   5  136.79   11.10
  -8  -6   5  135.59   12.90
   8   5  -5   24.00    6.30
   5  -8  -5    4.40    7.10
  -5   8   5   11.00    4.10
   8   5   5   17.40    5.30
  -8  -5   5   17.10    5.90
   4  -8  -5  198.38   18.50
   8   4  -5  196.88   16.60
  -4   8   5  227.38   14.10
   8   4   5  204.28   14.50
  -8  -4   5  201.78   14.30
   8   3  -5   14.40    6.30
   3  -8  -5    7.60    7.70
  -8  -3   5   14.10    4.40
   8   3   5   18.60    5.40
  -3   8   5    8.90    3.90
   2  -8  -5   39.00    9.00
   8   2  -5   -0.80    5.40
  -2   8   5    5.40    3.50
   8   2   5    2.20    4.20
  -8  -2   5   -2.80    2.60
   8   1  -5   38.40    8.40
   1  -8  -5   59.89   11.20
  -8  -1   5   44.20    6.40
   8   1   5   41.80    6.60
  -1   8   5   47.40    6.90
   8   0  -5  172.78   15.80
   0  -8  -5  155.58   18.10
  -8   0   5  172.38   11.90
   0   8   5  173.78   12.30
   0  -8   5  180.28   11.70
   8   0   5  156.88   12.40
   0  -8   5  167.88   11.80
  -1  -8  -5    4.30    8.00
   8  -1  -5    0.70    6.20
   8  -1   5   21.70    4.70
   1   8   5    9.50    4.20
  -1  -8   5   22.70    5.60
   8  -2  -5   57.09   10.20
  -2  -8  -5   54.69   11.50
   2   8   5   63.39    8.20
   8  -2   5   49.50    6.40
  -8   2   5   52.39    6.70
  -2  -8   5   56.59    7.70
  -3  -8  -5   29.60   10.00
   8  -3  -5   21.90    8.00
   8  -3   5   32.00    5.20
  -8   3   5   27.90    5.00
  -3  -8   5   31.40    5.70
  -4  -8  -5   44.90   11.10
   8  -4  -5   32.10    9.10
  -8   4   5   32.50    5.30
  -4  -8   5   39.00    6.50
   8  -4   5   28.10    5.00
   8  -5  -5   70.89   11.00
  -5  -8  -5   58.39   12.10
   8  -5   5   61.09    7.00
  -5  -8   5   71.79    8.90
  -8   5   5   62.19    7.80
   8  -6  -5   42.80   10.00
  -6  -8  -5   32.20   11.10
   8  -6   5   38.80    5.10
  -6  -8   5   51.49    7.70
  -8   6   5   35.60    6.10
   8  -7  -5   84.39   12.40
  -7  -8  -5   70.59   13.80
  -8   7   5   84.59    8.80
  -7  -8   5   86.09    9.90
   8  -7   5   78.19    6.90
  -8  -8  -5   -6.90    8.30
   8  -8  -5   -5.40    7.30
  -8   8   5    1.60    3.30
  -8  -8   5   -0.60    4.00
   8  -9  -5   11.00    8.90
  -9  -8   5   16.80    7.00
   9   8   5   14.70    6.60
  -8   9   5   14.20    4.90
   9   7  -5   92.29   11.60
   7  -9  -5   58.69   12.00
  -7   9   5   71.19    8.50
   9   7   5   51.99    8.80
  -9  -7   5   93.49   12.10
   6  -9  -5    1.90    7.40
   9   6  -5   12.10    5.80
  -6   9   5    0.70    3.40
   9   6   5    3.20    4.90
  -9  -6   5    3.30    4.80
   5  -9  -5   21.70    8.50
   9   5  -5   34.30    7.40
   9   5   5   18.80    5.60
  -9  -5   5   15.20    5.30
  -5   9   5   19.80    5.00
   9   4  -5   18.40    6.40
   4  -9  -5    8.90    7.80
  -4   9   5   10.10    4.20
  -9  -4   5   11.30    4.50
   9   4   5   12.60    5.20
   3  -9  -5   63.89   11.90
  -3   9   5   69.19    8.30
  -9  -3   5   69.49    8.60
   9   3   5   69.39    9.10
   2  -9  -5   41.40   11.70
   9   2  -5   43.40    9.20
   9   2   5   40.60    6.70
  -2   9   5   45.40    6.80
  -9  -2   5   40.10    6.20
   1  -9  -5   -2.80    8.00
   9   1  -5    4.20    6.20
   9   1   5    1.50    4.00
  -9  -1   5    1.10    2.90
  -1   9   5   -1.10    3.40
   1  -9   5    2.70    3.10
   9   0  -5   29.20    8.00
   0  -9   5   30.20    5.40
  -9   0   5   29.50    5.50
   9   0   5   22.80    5.40
   9  -1  -5   -2.90    5.80
  -1  -9  -5   -1.80    7.80
   9  -1   5    0.50    3.80
  -9   1   5    0.50    2.90
   1   9   5    1.10    3.60
  -1  -9   5   -3.60    3.50
  -2  -9  -5   45.70   11.20
   9  -2  -5   48.70    9.80
  -2  -9   5   73.19    8.50
  -9   2   5   45.10    6.40
   9  -2   5   47.20    6.50
   2   9   5   73.59    8.90
  -3  -9  -5   10.40    8.30
   9  -3  -5   -6.70    6.20
   9  -3   5   11.30    3.90
  -3  -9   5   28.60    5.30
   9  -4  -5   51.49   10.30
  -4  -9  -5   46.90   11.20
  -4  -9   5   52.29    7.90
  -9   4   5   51.19    7.10
   9  -4   5   64.29    7.20
  -5  -9  -5    3.20    8.60
   9  -5  -5   -0.80    6.60
  -5  -9   5    0.20    3.60
   9  -5   5   12.10    3.70
  -9   5   5   -0.20    3.10
   9  -6  -5   19.10    8.50
  -6  -9  -5   31.50   10.70
  -6  -9   5   22.20    6.00
  -9   6   5   25.10    5.40
   9  -6   5   25.00    4.30
  -7  -9  -5    2.30    9.00
   9  -7  -5    7.90    7.80
   9  -7   5    7.40    3.30
  -7  -9   5   11.00    5.00
  -9   7   5    8.20    4.20
  -8  -9  -5   50.09   12.10
   9  -8  -5   51.99   11.50
  -9   8   5   48.60    7.10
   9  -9  -5   29.80    9.70
  -9   9   5   25.40    5.60
   9   9   5   11.10    6.10
   9 -10  -5   -2.20    7.80
  10   9   5    0.40    5.40
   8 -10  -5    1.70    7.50
  10   8   5    6.90    5.60
  -8  10   5    1.70    4.00
   7 -10  -5   45.10   10.90
  10   7  -5   58.79    8.70
  -7  10   5   40.00    6.80
 -10  -7   5   50.99   12.10
  10   7   5   35.10    7.70
   6 -10  -5   -0.80    7.80
  10   6  -5   15.80    5.90
  10   6   5    5.00    5.00
 -10  -6   5    8.50    5.30
  -6  10   5    3.50    3.90
  10   5  -5  211.58   16.70
   5 -10  -5  163.68   18.10
 -10  -5   5  192.58   14.60
   5 -10   5  194.38   13.10
  10   5   5  187.78   14.90
  -5  10   5  187.38   13.90
  10   4  -5    5.80    6.00
   4 -10  -5    7.20    7.90
 -10  -4   5    5.50    4.10
  10   4   5    9.50    5.10
   4 -10   5    1.30    4.20
  -4  10   5    5.00    4.10
   3 -10  -5   36.20    9.80
  10   3  -5   28.90    7.90
  10   3   5   26.20    6.40
 -10  -3   5   23.10    5.40
  -3  10   5   29.90    6.00
   3 -10   5   27.50    6.40
  10   2  -5    8.10    6.60
   2 -10  -5    5.90    9.00
 -10  -2   5    6.50    3.80
   2 -10   5    4.00    4.20
  10   2   5    3.80    4.20
  -2  10   5    9.20    5.00
   1 -10  -5   35.70   10.70
  10   1  -5   41.10    8.70
 -10  -1   5   41.20    6.60
  -1  10   5   32.60    6.50
  10   1   5   33.90    6.40
   1 -10   5   32.80    6.00
   0 -10  -5   13.50    9.30
  10   0  -5   17.70    8.10
   0  10   5   24.70    5.90
 -10   0   5   17.70    4.80
  10   0   5   18.40    5.10
  -1 -10  -5   32.10   10.40
  10  -1  -5   24.70    8.50
   1  10   5   35.90    6.80
 -10   1   5   25.00    5.30
  10  -1   5   30.70    5.80
  -1 -10   5   36.90    6.10
  -2 -10  -5    8.00    8.40
  10  -2  -5    0.70    6.60
 -10   2   5   -0.10    3.00
  10  -2   5    7.60    4.10
  -2 -10   5    4.70    4.00
  -3 -10  -5   21.00    9.40
  10  -3  -5   22.70    8.20
  -3 -10   5   22.20    5.90
  10  -3   5   24.20    5.00
 -10   3   5   21.90    4.90
  10  -4  -5   76.59   12.10
  -4 -10  -5   64.69   12.60
 -10   4   5   67.49    8.10
  10  -4   5   71.09    8.00
  -4 -10   5   86.29   10.10
  10  -5  -5    9.30    7.50
  -5 -10  -5   30.80   10.90
  10  -5   5   15.70    4.10
 -10   5   5   17.90    5.00
  -5 -10   5   15.90    5.60
  -6 -10  -5  180.08   20.40
  10  -6  -5  141.29   17.20
  -6 -10   5  140.19   16.30
  10  -6   5  158.48   10.60
 -10   6   5  152.28   12.30
  10  -7  -5   -1.80    7.70
  -7 -10  -5    8.90    9.90
 -10   7   5    0.60    3.50
  10  -7   5    0.60    2.90
  10  -8  -5   15.90    9.10
 -10   8   5    4.60    3.80
  10  -9  -5    1.90    8.10
   9  10   5    6.00    5.90
  10 -10  -5   38.10   11.50
  10  10   5   53.49    9.30
  10 -11  -5   27.60   10.10
  11  10   5   15.90    6.90
   9 -11  -5   -2.00    7.80
  11   9   5   13.80    6.00
   8 -11  -5    8.50    8.10
  11   8   5   14.60    6.40
   7 -11  -5    7.10    8.00
  11   7  -5   16.50    6.40
  11   7   5    7.20    5.90
   6 -11  -5    5.80    7.60
  11   6  -5   16.00    6.00
  -6  11   5    2.20    4.30
  11   6   5    8.30    5.50
   5 -11  -5   -3.40    7.70
  11   5  -5    4.30    5.80
 -11  -5   5    5.70    4.20
  -5  11   5    2.00    4.10
  11   5   5   -1.80    4.70
  11   4  -5   10.10    7.00
   4 -11  -5   -9.30    7.50
 -11  -4   5    3.30    4.30
  11   4   5    1.90    4.70
  -4  11   5    3.70    4.30
   3 -11  -5   43.20   11.90
  11   3  -5   35.20    8.90
 -11  -3   5   50.49    7.60
  -3  11   5   46.30    8.10
  11   3   5   42.30    7.30
  11   2  -5    2.50    6.10
   2 -11  -5   -7.00    7.70
   2 -11   5   -5.10    4.10
  11   2   5    1.30    4.40
  -2  11   5    1.20    4.00
 -11  -2   5   -0.30    3.40
  11   1  -5   18.70    7.40
   1 -11  -5   10.00    8.90
  -1  11   5    1.10    4.80
 -11  -1   5    2.00    3.50
  11   1   5    3.10    4.70
   1 -11   5    6.10    4.10
   0 -11  -5   18.50    9.00
  11   0  -5   -0.60    6.30
   0 -11   5    3.00    3.90
 -11   0   5    3.90    3.70
  11   0   5    4.10    4.40
   0  11   5   22.20    5.80
  -1 -11  -5   31.40   10.20
  11  -1  -5   28.10    8.70
  -1 -11   5   15.80    5.40
 -11   1   5   16.90    4.80
  11  -1   5   20.60    5.60
   1  11   5   30.00    6.60
  11  -2  -5   -4.10    6.90
  -2 -11  -5   11.30    9.20
  11  -2   5    5.20    4.00
 -11   2   5   -1.60    3.00
  -3 -11  -5   14.20    9.60
  11  -3  -5   15.90    8.20
 -11   3   5   20.90    5.00
  11  -3   5   17.90    5.00
  -3 -11   5   22.10    7.20
  -4 -11  -5   31.50   11.30
  11  -4  -5   29.90    9.40
 -11   4   5   35.80    6.10
  11  -4   5   35.30    5.70
  -5 -11  -5   44.00   11.90
  11  -5  -5   -6.90    6.80
  11  -5   5    1.50    3.50
  -6 -11  -5   -9.20    9.20
  11  -6  -5   -9.60    6.60
  11  -6   5   -0.80    3.10
 -11   6   5   -2.10    3.20
  11  -7  -5   20.90    9.30
  -7 -11  -5   31.60   11.20
  11  -7   5   17.30    4.00
 -11   7   5   11.70    5.10
  11  -8  -5   43.40   11.00
  11  -9  -5    9.50    8.60
   9  11   5    0.50    6.40
  11 -10  -5    2.10    8.50
  10  11   5    4.00    6.10
  11 -11  -5    5.30    8.90
  11  11   5   -4.60    5.50
  11 -12  -5    7.90    9.20
  12  11   5    0.30    6.10
  10 -12  -5   24.10   10.40
  12  10   5   24.40    7.70
   9 -12  -5   -2.30    9.00
  12   9   5   13.00    6.50
   8 -12  -5    2.80    8.70
  12   8   5   20.40    6.70
   7 -12  -5    6.70    8.60
  12   7  -5   23.40    7.70
  12   7   5   20.40    6.60
   6 -12  -5  137.19   17.30
  12   6  -5  113.19   15.00
  12   6   5  140.39   13.20
  12   5  -5   12.50    7.50
   5 -12  -5   -1.80    7.50
  12   5   5   13.00    5.60
  12   4  -5   56.69   10.80
   4 -12  -5   66.99   12.40
 -12  -4   5   68.49   11.10
  12   4   5   63.69    8.70
   3 -12  -5    2.90    8.70
  12   3  -5    2.60    7.00
  12   3   5   -1.70    4.40
 -12  -3   5    2.10    3.70
   2 -12  -5    5.90    8.60
  12   2  -5    5.70    7.10
  12   2   5    5.70    4.80
  -2  12   5    2.20    6.20
 -12  -2   5    5.10    3.90
   1 -12  -5   70.69   12.90
  12   1  -5   68.89   11.60
  12   1   5   63.89    8.30
  -1  12   5   68.99   12.70
 -12  -1   5   72.99    9.10
  12   0  -5   46.20   10.20
   0 -12  -5   55.19   12.00
 -12   0   5   38.60    6.60
   0  12   5   39.50   12.50
  12   0   5   49.10    7.20
  12  -1  -5   11.40    8.30
  -1 -12  -5   30.40   10.60
  12  -1   5   28.80    6.00
 -12   1   5   22.30    5.70
  -2 -12  -5   12.20    9.20
  12  -2  -5    4.30    7.40
  12  -2   5    4.20    4.50
 -12   2   5    5.30    3.80
  -3 -12  -5   12.70    9.60
  12  -3  -5    9.50    7.90
  12  -3   5   12.20    4.90
 -12   3   5   13.40    4.40
  12  -4  -5   -3.60    7.40
  -4 -12  -5    1.10    9.20
  12  -4   5   -2.20    3.50
 -12   4   5    3.30    3.60
  12  -5  -5   57.29   11.50
  -5 -12  -5   46.00   12.90
 -12   5   5   55.69    7.90
  12  -5   5   48.40    6.30
  -6 -12  -5   -3.10   10.10
  12  -6  -5   18.00    8.50
  12  -6   5    2.50    3.40
  12  -7  -5   54.79   12.00
  -7 -12  -5   80.59   15.10
  12  -7   5   69.29    7.60
  12  -8  -5    5.00    8.00
  12  -9  -5   -3.50    8.30
   9  12   5    3.70    6.30
  12 -10  -5   17.00    9.90
  10  12   5   30.90    8.50
  12 -11  -5   10.30    9.50
  11  12   5    6.10    6.80
  12 -12  -5   -0.70    8.90
  12  12   5    3.70    6.20
  12 -13  -5  -15.10    8.40
  13  12   5    1.20    6.50
  11 -13  -5    9.40    9.50
  13  11   5    2.90    6.50
  10 -13  -5   -3.80    8.60
  13  10   5    0.70    5.90
   9 -13  -5   19.30    9.50
  13   9   5    3.60    6.20
   8 -13  -5    6.10    9.70
  13   8   5   18.50    7.00
  13   7  -5    3.80    6.30
   7 -13  -5   -4.50    8.40
  13   7   5   -4.80    5.20
   6 -13  -5  -18.60    7.20
  13   6  -5    7.70    6.50
  13   6   5   -5.90    4.50
  13   5  -5    8.40    7.40
   5 -13  -5   -3.00    9.20
  13   5   5    6.10    5.50
  13   4  -5   14.60    8.40
   4 -13  -5   21.00   10.60
  13   4   5   20.10    6.20
   3 -13  -5    7.60    8.90
  13   3  -5    3.70    7.30
  13   3   5    4.20    5.00
   2 -13  -5   44.40   12.10
  13   2  -5   38.00   10.20
  13   2   5   40.00    7.40
  13   1  -5    7.40    7.50
   1 -13  -5    6.70    8.90
 -13  -1   5    1.10    5.00
  13   1   5    6.80    5.10
  13   0  -5   -1.60    6.90
   0 -13  -5   10.70    9.00
  13   0   5    0.60    4.30
 -13   0   5    0.10    4.30
  13  -1  -5   31.60    9.90
  -1 -13  -5   35.10   10.50
  13  -1   5   35.00    6.60
 -13   1   5   31.60    7.00
  13  -2  -5   19.10    9.30
  -2 -13  -5   36.20   11.20
 -13   2   5   11.60    5.70
  13  -2   5   20.20    5.60
  -3 -13  -5   27.60   11.40
  13  -3  -5    5.90    8.10
  13  -3   5   16.10    5.20
  13  -4  -5   -6.40    6.70
  -4 -13  -5   -8.10    9.40
  13  -4   5   -5.00    3.60
  13  -5  -5   -0.20    7.90
  -5 -13  -5  -18.70    9.80
  13  -5   5    9.00    4.10
  -6 -13  -5    1.60   10.80
  13  -6  -5   15.20    8.80
  13  -6   5   13.90    4.40
  13  -7  -5    4.30    8.80
  -7 -13  -5    4.70   10.50
  13  -7   5   11.00    4.10
  13  -8  -5    0.70    8.40
   8  13   5   10.10    6.60
  13  -9  -5    0.90    9.00
   9  13   5    7.00    6.50
  13 -10  -5    3.70    9.30
  10  13   5    9.20    7.10
  13 -11  -5   -5.10    8.50
  11  13   5    4.10    6.40
  13 -12  -5   -0.80    9.30
  12  13   5    1.60    6.60
  13 -13  -5    2.90    9.80
  13  13   5   -3.50    6.30
  13 -14  -5    5.30   10.50
  14  13   5    5.10    7.00
  12 -14  -5   -1.60    9.60
  14  12   5   11.60    7.30
  11 -14  -5   18.50   11.00
  14  11   5    0.30    6.30
  10 -14  -5   -6.10    8.70
  14  10   5    3.50    6.50
   9 -14  -5    4.70    9.10
  14   9   5    0.90    5.80
   8 -14  -5   -7.80    8.00
  14   8   5    2.10    5.70
   7 -14  -5   29.60   11.10
  14   7   5   22.90    6.90
   6 -14  -5   -1.70    8.60
  14   6  -5  -12.60    5.80
  14   6   5    9.50    5.60
  14   5  -5   -0.30    7.20
   5 -14  -5    1.20    9.10
  14   5   5   16.10    6.40
   4 -14  -5    2.10    8.90
  14   4  -5   10.60    7.80
  14   4   5    4.90    5.20
   3 -14  -5   -5.40    8.20
  14   3  -5    1.70    7.00
  14   3   5    5.30    5.00
  14   2  -5   14.10    8.70
   2 -14  -5   13.00    9.70
  14   2   5   27.50    6.80
  14   1  -5   -8.10    7.00
   1 -14  -5   -6.10    8.30
  14   1   5   -1.30    4.80
   0 -14  -5   66.49   13.20
  14   0  -5   71.79   13.40
  14   0   5   72.69    9.00
  -1 -14  -5    7.90    9.20
  14  -1  -5   -9.10    6.60
  14  -1   5    1.00    4.60
  -2 -14  -5   12.60   10.40
  14  -2  -5   -3.80    6.60
  14  -2   5    0.30    4.30
  14  -3  -5   41.50   10.90
  -3 -14  -5   48.60   13.30
  14  -3   5   44.70    6.80
  -4 -14  -5  103.99   17.40
  14  -4  -5  126.29   16.70
  14  -4   5  129.39   10.80
  -5 -14  -5   66.39   14.40
  14  -5  -5   72.89   13.30
  14  -5   5   79.69    8.80
  -6 -14  -5   73.99   15.60
  14  -6  -5   73.59   13.30
  14  -6   5   74.89    8.60
  14  -7  -5    8.20    8.90
  -7 -14  -5   -4.30    9.90
  14  -7   5    1.90    3.60
  14  -8  -5   -0.20    8.20
   8  14   5    9.90    6.40
  14  -9  -5    9.10    9.60
   9  14   5   26.60    8.00
  14 -10  -5    6.30    9.90
  10  14   5    8.70    7.20
  14 -11  -5    9.50   10.10
  11  14   5   24.80    8.30
  14 -12  -5    1.20    9.80
  12  14   5    1.80    6.40
  14 -13  -5   -4.00    9.20
  13  14   5   -4.70    6.40
  12 -15  -5    3.60    9.50
  15  12   5   -0.30    6.10
  11 -15  -5    4.80   10.30
  15  11   5    9.50    6.70
  10 -15  -5   18.20   11.20
  15  10   5   15.70    7.10
   9 -15  -5   -2.00    9.10
  15   9   5   10.30    6.60
   8 -15  -5    3.90    9.30
  15   8   5    4.30    6.10
   7 -15  -5    3.00    9.30
  15   7   5    2.20    5.60
   6 -15  -5    0.20    8.70
  15   6  -5  -13.50    6.60
  15   6   5    9.90    6.10
   5 -15  -5   -1.30    8.80
  15   5  -5   -8.30    6.90
  15   5   5    4.20    5.70
   4 -15  -5    7.90   10.00
  15   4  -5   14.40    8.80
  15   4   5    9.30    5.70
  15   3  -5    0.60    7.60
   3 -15  -5   -1.00    9.30
  15   3   5    8.90    5.70
   2 -15  -5   31.10   11.90
  15   2  -5   24.10    9.60
  15   2   5   19.80    6.70
   1 -15  -5   -8.80    8.30
  15   1  -5   -1.50    7.40
  15   1   5    2.50    5.10
   0 -15  -5  -16.00    7.80
  15   0  -5    2.90    7.60
  15   0   5   -7.60    4.40
  -1 -15  -5    1.40    9.70
  15  -1  -5    1.60    7.90
  15  -1   5    3.00    4.70
  15  -2  -5   34.10   10.30
  -2 -15  -5   36.50   12.60
  15  -2   5   37.80    6.70
  15  -3  -5   -9.30    7.10
  -3 -15  -5    7.10   10.20
  15  -3   5    1.90    4.40
  15  -4  -5   15.10    9.20
  -4 -15  -5   24.20   11.80
  15  -4   5   13.00    5.10
  15  -5  -5   -5.00    7.70
  -5 -15  -5    3.80   10.00
  15  -5   5    0.90    4.00
  -6 -15  -5   16.80   11.40
  15  -6  -5    5.80    9.00
  15  -6   5    9.60    4.60
  -7 -15  -5    8.90   10.60
  15  -7  -5   -8.30    7.90
  15  -7   5   -2.00    3.60
  15  -8  -5   13.50    9.70
   8  15   5   21.00    7.90
  15  -9  -5   -3.30    8.90
   9  15   5   -1.10    6.20
  15 -10  -5   -1.50    9.30
  10  15   5   -2.00    6.90
  15 -11  -5   -3.50    9.80
  11  15   5    6.60    7.10
  15 -12  -5   -6.90    9.40
  12  15   5   -3.30    6.60
  11 -16  -5    2.20    9.50
  10 -16  -5    5.30    9.70
  16  10   5   -2.50    5.90
   9 -16  -5   16.80   10.80
  16   9   5   11.90    6.90
   8 -16  -5   51.59   13.40
  16   8   5   51.29    9.50
   7 -16  -5   29.20   12.00
  16   7   5   38.20    8.50
   6 -16  -5   36.60   12.00
  16   6  -5   23.10   10.00
  16   6   5   48.90    8.80
  16   5  -5  -11.60    7.20
   5 -16  -5   -9.40    8.30
  16   5   5   -2.20    5.30
  16   4  -5   -7.40    7.10
   4 -16  -5   -6.80    8.80
  16   4   5   -0.20    5.30
   3 -16  -5   11.40    9.80
  16   3  -5    5.10    8.00
  16   3   5    8.50    5.90
   2 -16  -5   -5.50    8.80
  16   2  -5   -0.50    8.00
  16   2   5   -1.30    5.00
  16   1  -5   -3.30    7.90
   1 -16  -5   17.40   10.50
  16   1   5    6.70    5.60
   0 -16  -5   -2.90    9.20
  16   0  -5    0.10    7.40
  16   0   5    0.90    4.70
  -1 -16  -5   12.10   10.20
  16  -1  -5   -9.90    7.30
  16  -1   5   -1.30    4.50
  16  -2  -5    5.80    8.20
  -2 -16  -5   25.90   11.60
  16  -2   5    3.50    4.80
  16  -3  -5    3.80    7.90
  -3 -16  -5    7.10   10.80
  16  -3   5    8.60    4.70
  16  -4  -5   60.29   13.00
  -4 -16  -5   40.80   13.30
  16  -4   5   52.89    7.50
  -5 -16  -5   -3.40   10.10
  16  -5  -5   -9.30    8.00
  16  -5   5    4.30    4.40
  16  -6  -5    7.50    9.60
  -6 -16  -5   29.40   12.40
  16  -6   5   14.80    4.90
  16  -7  -5   -5.00    8.80
  16  -7   5    3.80    4.30
  16  -8  -5   17.90   10.50
   8  16   5   25.60    8.50
  16  -9  -5    4.50   10.00
   9  16   5    5.30    7.20
  16 -10  -5   25.50   11.80
  10  16   5   31.30    9.20
  16 -11  -5    5.30   10.40
   9 -17  -5   -7.80    9.10
  17   9   5    7.70    6.60
   8 -17  -5   -5.50    9.30
  17   8   5   -3.30    6.00
   7 -17  -5    4.20   10.00
  17   7   5    0.60    5.90
  17   6  -5    6.50    8.70
   6 -17  -5    5.20   10.00
  17   6   5   19.90    7.10
  17   5  -5    5.20    9.00
   5 -17  -5    8.30   10.30
  17   5   5    4.70    6.20
  17   4  -5   16.80    9.50
   4 -17  -5   15.70   10.70
  17   4   5   18.50    6.70
  17   3  -5   -2.60    8.40
   3 -17  -5    3.50    9.90
  17   3   5    2.40    5.60
  17   2  -5    1.00    8.80
   2 -17  -5    5.70   10.00
  17   2   5   -1.80    5.00
   1 -17  -5   13.20   10.50
  17   1  -5    3.20    8.40
  17   1   5    0.70    5.20
   0 -17  -5   14.50   10.90
  17   0  -5   -4.50    7.50
  17   0   5   -1.10    4.70
  17  -1  -5   18.80    9.70
  -1 -17  -5   18.10   11.80
  17  -1   5   13.20    5.50
  -2 -17  -5    9.90   11.30
  17  -2  -5    9.50    9.00
  17  -2   5    6.80    5.00
  17  -3  -5   -0.80    8.40
  -3 -17  -5   16.50   11.50
  17  -3   5   -3.40    4.30
  17  -4  -5   11.20    9.40
  -4 -17  -5   -1.50   11.10
  17  -4   5   17.50    5.60
  17  -5  -5  -13.30    8.20
  -5 -17  -5    1.10   11.00
  17  -5   5    2.40    4.40
  17  -6  -5   -6.30    8.80
  -6 -17  -5   26.00   12.40
  17  -6   5    6.10    4.50
  17  -7  -5   10.70    9.90
   7  17   5   14.70    7.70
  17  -8  -5   14.60   10.40
   8  17   5   31.60    9.00
  17  -9  -5   -1.90    9.70
   9  17   5    6.60    7.70
   7 -18  -5    4.20   10.10
  18   7   5   -3.10    6.00
  18   6  -5    3.00    8.60
   6 -18  -5   13.30   11.30
  18   6   5   17.80    6.90
  18   5  -5    1.30    8.40
   5 -18  -5   11.40   10.40
  18   5   5    7.40    6.40
   4 -18  -5    9.10   10.30
  18   4  -5    2.50    9.00
  18   4   5    9.90    6.10
  18   3  -5    3.10    8.70
   3 -18  -5   23.60   11.90
  18   3   5   20.50    6.90
   2 -18  -5   59.09   14.50
  18   2  -5   41.90   12.40
  18   2   5   47.20    8.30
   1 -18  -5    2.90   10.70
  18   1  -5   -5.00    8.70
  18   1   5    5.40    5.20
  18   0  -5   -3.10    8.50
   0 -18  -5   12.00   11.30
  18   0   5   -0.10    4.80
  -1 -18  -5   34.10   13.30
  18  -1  -5   -1.10    8.30
  18  -1   5   10.60    5.60
  18  -2  -5   16.00   10.10
  -2 -18  -5   19.80   12.70
  18  -2   5   17.90    6.00
  18  -3  -5   39.80   11.60
  -3 -18  -5   22.10   12.30
  18  -3   5   36.10    7.10
  -4 -18  -5   12.90   12.10
  18  -4  -5    4.90   10.00
  18  -4   5    7.30    4.90
  -5 -18  -5    9.50   12.10
  18  -5  -5    6.10    9.80
  18  -5   5   12.80    5.30
  18  -6  -5    6.90   10.10
  -6 -18  -5    3.70   12.00
  18  -6   5   -1.10    4.20
  18  -7  -5    6.70    9.60
   7  18   5    3.30    6.80
   4 -19  -5   10.40   11.00
  19   3  -5    2.10    8.60
   3 -19  -5    7.00   10.50
  19   3   5    2.10    5.40
   2 -19  -5    2.50   11.00
  19   2  -5    1.30    8.90
  19   2   5    4.70    5.60
   1 -19  -5    5.80   10.90
  19   1  -5  -11.80    7.70
  19   1   5   -3.20    4.90
   0 -19  -5   15.20   12.10
  19   0  -5   15.00    9.80
  19   0   5   14.60    6.10
  19  -1  -5    5.70    9.30
  -1 -19  -5    3.00   11.60
  19  -1   5    0.70    5.00
  19  -2  -5    0.80    8.80
  -2 -19  -5    1.70   11.60
  19  -2   5    4.70    5.20
  19  -3  -5   -1.40    8.50
  -3 -19  -5    9.30   12.10
  19  -3   5    0.40    4.60
  19  -4  -5    2.60    9.30
   0   0  -6  381.16   25.60
   1  -1  -6   11.50    7.60
  -1   1  -6    8.60    7.60
   1   1  -6   13.10    7.30
  -1  -1  -6    7.90    7.70
  -1   2  -6   60.39   11.10
  -2  -1  -6   73.29   12.10
   1  -2  -6   64.79   11.50
   2   0  -6   56.89   10.60
   0  -2  -6   78.49   11.80
   0   2  -6   75.39   11.20
  -2   0  -6   43.20   11.00
  -1  -2  -6   29.30    9.40
  -2   1  -6   34.30    9.90
   1   2  -6   64.09   10.20
   2  -1  -6   35.50    9.60
  -2   2  -6   29.30    9.90
   2  -2  -6   25.80    8.80
  -2  -2  -6   21.90    9.10
   2   2  -6   15.70    7.60
  -3  -2  -6    6.20    8.10
   2  -3  -6    1.10    8.00
   3   2  -6   14.60    7.40
  -2   3  -6   21.40    8.50
  -1   3  -6   17.60    7.90
   3   1  -6   14.50    7.30
   1  -3  -6   -3.40    7.50
  -3  -1  -6    2.30    8.00
   0   3  -6    6.70    7.80
   0  -3  -6   12.90    8.60
  -3   0  -6    0.90    8.50
   3   0  -6    5.80    7.00
  -1  -3  -6   20.00    9.00
  -3   1  -6   27.60    9.10
   1   3  -6   15.90    8.20
   3  -1  -6   13.00    8.00
   2   3  -6    2.10    6.60
  -3   2  -6   -8.70    6.70
   3  -2  -6   -1.80    6.80
  -2  -3  -6   14.50    8.80
  -3   2   6    0.20    2.40
  -3  -3  -6   12.80    8.80
  -3   3  -6   17.20    8.70
   3  -3  -6   26.60    9.00
  -3   3   6   21.30    4.00
   3  -4  -6   10.90    8.00
  -3   4  -6    4.60    7.70
   4   3  -6   15.20    7.30
  -4  -3  -6   12.80    8.80
  -3   4   6   13.30    3.70
  -4  -3   6   15.90    3.50
  -2   4  -6   54.49   10.50
   2  -4  -6   51.89   11.60
   4   2  -6   59.99   10.30
  -4  -2  -6   54.29   11.50
  -2   4   6   59.09    6.70
   1  -4  -6   47.40   11.00
  -4  -1  -6   21.70    9.60
  -1   4  -6   39.00    9.70
   4   1  -6   38.40    9.10
  -4  -1   6   32.20    4.40
   4   0  -6   78.89   11.50
   0   4  -6   95.89   12.40
   0  -4  -6   79.99   12.80
  -4   0  -6   74.49   12.80
  -4   1  -6   46.70   10.60
  -1  -4  -6   54.29   11.70
   4  -1  -6   48.10    9.90
  -4   1   6   48.80    5.60
   4  -2  -6    1.20    6.70
   2   4  -6   -3.10    6.90
  -4   2  -6   -9.40    7.30
  -2  -4  -6  -10.70    7.00
  -4   2   6   -2.70    2.40
   3   4  -6   11.20    6.60
  -3  -4  -6   -3.10    7.40
  -4   3  -6   12.00    8.80
   4  -3  -6    3.90    6.50
  -4   3   6    9.80    3.20
   4   4  -6   -1.40    6.40
  -4   4  -6   -0.20    8.10
   4  -4  -6    1.80    7.20
  -4  -4  -6    9.60    8.60
  -4  -4   6    2.30    3.10
  -4   4   6   -0.80    2.60
   5   4  -6  117.99   13.90
   4  -5  -6  101.99   13.60
  -5  -4  -6   90.49   14.30
   4  -5   6  104.09    9.00
  -5  -4   6  100.79    9.00
  -4   5   6   82.19    8.40
   5   3  -6   14.90    7.10
  -3   5  -6    7.20    7.80
  -5  -3  -6    4.40    8.60
   3  -5  -6    7.30    8.10
  -3   5   6   -1.00    3.30
  -5  -3   6    5.90    2.90
   2  -5  -6   19.00    9.50
  -2   5  -6   10.00    7.40
   5   2  -6   22.80    7.80
  -5  -2  -6   33.40   10.20
  -5  -2   6   15.60    3.80
  -2   5   6   19.90    4.60
  -5  -1  -6    2.40    8.40
   5   1  -6   -0.60    6.50
  -1   5  -6    0.90    6.50
   1  -5  -6   -7.70    7.60
  -5  -1   6   -1.50    2.20
  -5   0  -6   18.50    9.40
   0  -5  -6   10.20    8.50
   5   0  -6   22.00    8.00
   0   5  -6   11.50    7.60
  -5   0   6   10.80    3.30
  -5   1  -6    7.60    8.70
   5  -1  -6    0.10    6.50
  -1  -5  -6  -10.40    7.00
   1   5  -6    0.90    6.90
  -5   1   6   -2.10    2.30
   2   5  -6   76.89   10.30
  -5   2  -6   34.80   10.30
  -2  -5  -6   25.90    9.80
   5  -2  -6   36.50    9.00
  -5   2   6   39.10    5.20
   5  -3  -6   18.60    7.40
  -3  -5  -6    2.50    7.70
   3   5  -6    6.40    6.70
  -5   3   6    3.00    3.00
   5  -4  -6   27.60    9.00
   4   5  -6   35.90    8.10
  -4  -5  -6    5.90    8.50
  -4  -5   6   26.50    4.70
   5  -4   6   17.40    4.80
  -5   4   6   17.60    4.40
   5  -5  -6   14.70    7.80
  -5  -5  -6    4.20    8.70
   5   5  -6   10.90    7.20
   5  -5   6    3.10    3.90
  -5   5   6    8.80    3.60
  -5  -5   6   14.00    4.30
   5  -6  -6   -9.30    7.20
  -6  -5  -6    4.30    8.80
   6   5  -6   12.50    7.00
   5  -6   6   -1.10    3.10
  -5   6   6    1.60    4.10
  -6  -5   6    1.20    6.70
   4  -6  -6   45.80   11.00
  -6  -4  -6   47.20   11.60
   6   4  -6   82.89   11.20
  -4   6   6   57.19    7.60
  -6  -4   6   65.69    8.00
   4  -6   6   61.59    7.30
  -6  -3  -6   50.59   11.80
   3  -6  -6   56.19   11.70
   6   3  -6   66.49   10.90
  -3   6   6   57.29    7.30
  -6  -3   6   55.89    6.80
   3  -6   6   64.49    7.20
   2  -6  -6   90.79   14.30
  -6  -2  -6   95.19   14.70
   6   2  -6   99.09   12.50
  -2   6   6   81.29    8.50
  -6  -2   6   87.29    8.00
  -6  -1  -6    6.30    9.10
   1  -6  -6    1.10    8.40
   6   1  -6    3.60    6.70
  -6  -1   6    2.00    2.70
  -1   6   6    7.90    3.80
  -6   0  -6   74.49   13.00
   6   0  -6   68.09   11.10
   0  -6  -6   53.49   11.90
  -6   0   6   59.19    6.60
   0   6   6   50.99    7.30
   6  -1  -6   28.20    8.90
  -1  -6  -6   28.40    9.90
  -6   1   6   26.40    4.70
   6  -2  -6   -4.60    6.80
  -2  -6  -6    0.20    7.60
   6  -2   6    9.30    4.50
  -6   2   6    4.30    3.10
   6  -3  -6    6.20    7.20
  -3  -6  -6    7.30    8.20
  -6   3   6    0.80    3.10
  -3  -6   6    2.80    4.30
   6  -3   6    3.10    4.10
  -4  -6  -6   71.79   13.30
   6  -4  -6   54.99   10.90
   6  -4   6   60.09    8.10
  -4  -6   6   82.09    9.30
  -6   4   6   69.49    7.70
  -5  -6  -6   42.10   11.50
   6  -5  -6   31.70    9.50
  -6   5   6   35.70    7.10
  -5  -6   6   31.40   10.20
   6  -5   6   30.50    5.30
   6  -6  -6   18.10    8.30
  -6  -6  -6   13.50    9.80
   6  -6   6   14.80    4.30
   6  -7  -6   13.40    8.60
  -7  -6  -6   12.40    9.90
  -7  -5  -6   43.00   11.40
   5  -7  -6   48.10   10.80
   7   5  -6   40.10    9.70
  -7  -4  -6    4.40    9.40
   4  -7  -6   33.00    9.10
   7   4  -6   13.30    7.30
  -7  -3  -6    6.90    9.70
   7   3  -6   13.60    7.20
   3  -7  -6   12.30    8.70
  -3   7   6   13.70    4.80
  -7  -3   6   16.60    5.20
   7   2  -6   10.10    7.30
   2  -7  -6   11.80    8.60
  -7  -2  -6   11.30    9.90
  -7  -2   6    8.60    3.70
  -2   7   6    5.30    3.90
   1  -7  -6   12.80    9.10
   7   1  -6    5.70    7.10
   7   1   6   -1.00    4.70
  -1   7   6    3.30    3.70
  -7  -1   6   -1.10    2.80
   0  -7  -6   42.90   11.00
   7   0  -6   39.60    9.60
   0   7   6   54.99    7.30
   7   0   6   29.30    6.60
  -7   0   6   33.70    5.40
  -1  -7  -6   10.00    8.50
   7  -1  -6   28.20    8.30
  -7   1   6   15.50    4.00
   1   7   6   17.30    4.80
   7  -1   6   18.60    5.50
  -2  -7  -6   10.00    8.80
   7  -2  -6    5.20    7.00
  -7   2   6    2.90    3.10
   7  -2   6    4.50    4.40
   7  -3  -6   -0.70    6.80
  -3  -7  -6   11.50    8.60
  -7   3   6   -1.10    2.80
   7  -3   6    3.10    4.00
  -3  -7   6    2.00    3.60
  -4  -7  -6   10.10    8.60
   7  -4  -6   11.10    8.20
   7  -4   6   11.60    4.40
  -5  -7  -6   -3.60    8.40
   7  -5  -6    8.00    7.70
   7  -5   6    8.60    3.60
   7  -6  -6   41.70   10.30
  -6  -7  -6   47.00   12.10
   7  -6   6   41.00    5.70
   7  -7  -6    2.60    7.60
  -7  -7  -6   13.80   10.40
  -8  -7  -6   24.80   11.30
   7  -8  -6   21.50    9.40
   6  -8  -6   22.20    9.40
   8   5  -6    7.60    6.50
   5  -8  -6   -1.30    7.60
   8   4  -6   -0.50    6.60
   4  -8  -6   -1.30    8.30
   8   4   6   -0.40    5.20
   8   3  -6   58.09   10.30
   3  -8  -6   42.80   11.90
   8   3   6   50.49    8.40
   2  -8  -6    3.60    8.70
   8   2  -6    5.20    6.80
   8   2   6   18.30    6.10
   1  -8  -6   29.00   10.50
   8   1  -6   29.30    9.00
   8   1   6   27.40    6.30
   0  -8  -6   -6.90    7.70
   8   0  -6    3.50    7.10
   8   0   6    1.30    4.90
   8  -1  -6   14.00    8.00
  -1  -8  -6    7.90    8.50
   8  -1   6   19.10    5.60
   8  -2  -6    4.80    7.50
  -2  -8  -6    3.90    8.90
   8  -2   6    6.30    4.50
   8  -3  -6   33.50    9.60
  -3  -8  -6   19.90    9.90
   8  -3   6   31.80    5.70
   8  -4  -6   74.39   13.10
  -4  -8  -6   72.29   14.00
   8  -4   6   88.59    9.10
  -5  -8  -6   -2.60    8.40
   8  -5  -6   -1.50    7.10
   8  -5   6   -0.60    3.50
   8  -6  -6   49.70   11.10
  -6  -8  -6   32.90   11.70
   8  -6   6   26.90    5.10
   8  -7  -6   18.20    9.20
  -7  -8  -6   10.70   10.30
   8  -8  -6   46.30   12.30
  -8  -8  -6   52.89   13.00
   8  -9  -6   -5.40    8.00
   9   8   6    1.10    5.70
   7  -9  -6   -3.20    8.00
   9   7   6    2.80    6.20
   6  -9  -6   26.10   10.20
   9   6   6   23.00    7.70
   5  -9  -6  -15.50    7.30
   9   5  -6   11.50    7.00
   9   5   6    1.30    5.40
   9   4  -6   47.40    9.60
   4  -9  -6   33.10   10.70
   9   4   6   41.10    8.10
   3  -9  -6    9.20    9.00
   9   3  -6   -2.60    6.60
   9   3   6    2.70    5.30
   2  -9  -6   15.50    9.40
   9   2  -6   17.60    8.40
   9   2   6   32.30    6.70
   9   1  -6    9.10    7.70
   1  -9  -6    9.70    9.00
   9   1   6    6.20    5.50
   9   0  -6   -1.30    7.00
   0  -9  -6   -4.70    8.30
  -1  -9  -6   13.30    8.80
   9  -1  -6    0.40    7.40
   9  -1   6    6.60    4.90
   9  -2  -6   18.50    8.80
  -2  -9  -6   20.90   10.40
   9  -2   6   11.70    5.00
  -3  -9  -6  -10.70    7.70
   9  -3  -6    3.60    7.40
   9  -3   6    5.70    4.50
   9  -4  -6   24.10    9.40
  -4  -9  -6   30.50   11.10
   9  -4   6   35.00    5.80
  -5  -9  -6   17.90   10.50
   9  -5  -6    9.00    9.10
   9  -5   6   16.80    4.70
   9  -6  -6   22.80   10.00
  -6  -9  -6   10.50   10.90
   9  -6   6   22.70    5.20
   9  -7  -6    8.50    8.70
  -7  -9  -6   18.50   11.10
  -8  -9  -6    3.90   10.30
   9  -8  -6    3.50    8.40
   9  -9  -6   -0.40    8.40
   9   9   6    1.90    6.00
   9 -10  -6    7.90    8.90
  10   9   6   15.50    7.40
   8 -10  -6   55.29   12.90
  10   8   6   79.29   11.10
   7 -10  -6   -5.60    8.30
  10   7   6   -0.40    5.60
   6 -10  -6   14.10    9.30
  10   6   6   10.40    6.40
  10   5  -6   23.10    8.10
   5 -10  -6   -3.80    8.20
  10   5   6    3.00    5.90
   4 -10  -6   75.59   14.30
  10   4   6   72.49   10.10
  10   3  -6   -0.60    7.00
   3 -10  -6  -11.90    8.30
  10   3   6    5.80    5.50
   2 -10  -6  123.69   17.20
  10   2  -6  136.19   16.80
  10   2   6  151.08   13.50
   1 -10  -6    7.00    8.80
  10   1  -6    8.90    7.80
  10   1   6   12.50    5.50
  10   0  -6   14.90    8.80
   0 -10  -6   33.00   11.30
  10   0   6   18.60    6.00
  -1 -10  -6    3.50    9.10
  10  -1  -6    1.90    7.70
  10  -1   6    4.40    4.90
  -2 -10  -6   -3.70    8.50
  10  -2  -6   -5.40    7.50
  10  -2   6    4.60    4.70
  10  -3  -6   17.50    9.50
  10  -3   6   30.60    5.90
  -4 -10  -6   21.80   11.60
  10  -4  -6   21.20    9.60
  10  -4   6   20.10    5.30
  10  -5  -6   -4.70    7.80
  -5 -10  -6   10.90   10.50
  10  -5   6    2.30    4.00
  10  -6  -6    2.80    8.60
  -6 -10  -6   -0.50    9.80
  10  -6   6   -1.30    3.50
  10  -7  -6   11.20    9.60
  -7 -10  -6   14.00   11.00
  -8 -10  -6    6.40   10.80
  10  -8  -6    9.80    9.20
  10  -9  -6   15.40    9.50
   9  10   6   10.20    7.60
  10 -10  -6    9.50    9.80
  10  10   6   19.30    8.20
  10 -11  -6    5.00    9.40
  11  10   6  -10.60    5.90
   9 -11  -6    2.60    9.10
  11   9   6    0.80    6.50
   8 -11  -6    2.00    9.30
  11   8   6    9.20    7.00
   7 -11  -6    2.90    9.10
  11   7   6   22.20    8.00
   6 -11  -6   14.60   10.00
  11   6   6   29.10    8.00
   5 -11  -6   13.50    9.50
  11   5  -6   35.10    9.20
  11   5   6   20.20    7.30
   4 -11  -6    9.20    9.10
  11   4  -6   27.70    8.70
  11   4   6    6.30    5.80
   3 -11  -6   30.10   10.10
  11   3  -6    2.10    7.50
  11   3   6    7.50    5.70
   2 -11  -6   13.10    9.40
  11   2  -6    8.80    8.10
  11   2   6    9.90    5.70
  11   1  -6    9.60    8.10
   1 -11  -6    5.60    8.80
  11   1   6    7.90    5.50
  11   0  -6   16.40    8.90
   0 -11  -6   24.50   10.60
  11   0   6   20.50    6.40
  -1 -11  -6   53.79   11.80
  11  -1  -6    0.50    8.10
  11  -1   6   -0.30    4.60
  -2 -11  -6   14.20    9.80
  11  -2  -6    3.40    8.30
  11  -2   6    5.20    4.90
  11  -3  -6    1.10    8.30
  -3 -11  -6   22.40   10.50
  11  -3   6    2.20    4.40
  11  -4  -6    1.60    8.60
  -4 -11  -6   19.20   10.90
  11  -4   6    1.20    4.20
  -5 -11  -6   -1.40   10.40
  11  -5  -6   -3.80    8.40
  11  -5   6   -1.60    4.00
  -6 -11  -6    7.30   11.60
  11  -6  -6   22.00    9.90
  11  -6   6   18.60    5.50
  11  -7  -6   -5.20    8.00
  -7 -11  -6   -8.70    9.80
  11  -8  -6   22.40   10.40
  -8 -11  -6   17.20   11.30
  11  -9  -6    3.90    9.40
   9  11   6    7.20    7.20
  11 -10  -6   -0.40    9.00
  10  11   6   -4.40    6.30
  11 -11  -6    1.80   10.20
  11  11   6   -0.50    6.80
  11 -12  -6   -0.80    9.70
  12  11   6   -1.70    6.40
  10 -12  -6   18.70   10.50
  12  10   6   -1.60    6.40
   9 -12  -6    5.10    9.60
  12   9   6   13.70    7.30
   8 -12  -6    5.70    9.30
  12   8   6   -2.30    5.90
   7 -12  -6   -6.50    8.50
  12   7   6   -0.70    6.00
   6 -12  -6   -4.90    8.60
  12   6   6    2.40    6.10
   5 -12  -6    1.80    9.20
  12   5  -6   11.00    7.20
  12   5   6   13.00    6.50
  12   4  -6    8.50    7.80
   4 -12  -6    1.40    9.70
  12   4   6   -0.40    5.70
  12   3  -6   17.40    8.60
   3 -12  -6   20.20   10.80
  12   3   6   24.10    6.90
  12   2  -6   69.59   12.60
   2 -12  -6   59.79   13.70
  12   2   6   71.79   10.00
  12   1  -6   -1.00    7.70
   1 -12  -6    6.30    8.90
  12   1   6   -3.20    4.90
  12   0  -6    1.30    7.90
   0 -12  -6    1.00    8.30
  12   0   6   -1.50    4.80
  -1 -12  -6   19.20   10.30
  12  -1  -6    0.50    8.10
  12  -1   6    3.70    4.90
  12  -2  -6  149.09   18.80
  -2 -12  -6  160.08   21.00
  12  -2   6  157.88   13.10
  -3 -12  -6   35.80   11.60
  12  -3  -6    3.90    8.50
  12  -3   6   -0.30    4.60
  -4 -12  -6   59.19   13.80
  12  -4  -6   57.79   12.60
  12  -4   6   44.60    7.10
  -5 -12  -6   -1.40   10.10
  12  -5  -6    2.40    8.60
  12  -5   6    2.70    4.30
  12  -6  -6   12.10    9.70
  -6 -12  -6   14.40   11.80
  12  -7  -6    9.70    9.50
  -7 -12  -6   -1.80   10.50
  12  -8  -6   41.70   12.70
  12  -9  -6    4.60    9.70
   9  12   6   13.60    8.10
  12 -10  -6   -4.60    9.00
  10  12   6   -7.10    6.50
  12 -11  -6   -4.50    9.20
  11  12   6   -3.40    6.90
  12 -12  -6    6.30   10.00
  12  12   6    1.50    7.20
  11 -13  -6   -8.30    9.30
  13  11   6   -1.30    6.60
  10 -13  -6    0.70    9.90
  13  10   6    5.50    6.90
   9 -13  -6    0.40    9.40
  13   9   6   -1.70    6.30
   8 -13  -6  -11.70    8.90
  13   8   6    0.30    6.20
   7 -13  -6  -12.00    8.80
  13   7   6   -2.80    5.90
   6 -13  -6   -5.80    9.00
  13   6   6    0.80    5.90
   5 -13  -6    9.20    9.50
  13   5  -6    2.30    6.80
  13   5   6   -4.20    5.20
  13   4  -6    9.20    7.80
   4 -13  -6   12.50    9.70
  13   4   6    8.30    5.80
   3 -13  -6   -2.90    8.40
  13   3  -6    2.80    7.80
  13   3   6   -3.30    5.30
  13   2  -6    4.40    8.00
   2 -13  -6   17.20   10.20
  13   2   6   -0.90    5.30
  13   1  -6    6.30    8.40
   1 -13  -6   13.20   10.40
  13   1   6    8.10    5.90
   0 -13  -6   18.10   10.70
  13   0  -6   -0.80    8.30
  13   0   6   -3.70    4.70
  -1 -13  -6   18.00   10.80
  13  -1  -6    7.60    8.70
  13  -1   6   -0.40    5.00
  -2 -13  -6   22.90   11.10
  13  -2  -6   -0.40    8.10
  13  -2   6    3.70    5.20
  -3 -13  -6   13.20   10.90
  13  -3  -6    6.00    9.20
  13  -3   6   13.40    5.40
  13  -4  -6   47.80   12.50
  -4 -13  -6   52.29   13.80
  13  -4   6   39.90    6.90
  -5 -13  -6   12.60   11.20
  13  -5  -6   13.00    9.80
  13  -5   6   18.20    5.20
  13  -6  -6   31.10   11.60
  -6 -13  -6   14.50   11.70
  13  -7  -6   -0.90    9.10
  -7 -13  -6    1.10   10.40
  13  -8  -6    1.90    9.80
  13  -9  -6   -6.00    9.10
   9  13   6    8.70    7.00
  13 -10  -6    3.90   10.50
  10  13   6   18.30    8.50
  13 -11  -6  -13.80    9.00
  11  13   6   -3.20    7.00
  10 -14  -6   32.10   12.40
  14  10   6   33.00    8.80
   9 -14  -6   12.90   10.30
  14   9   6    1.60    6.20
   8 -14  -6   -0.80    9.30
  14   8   6    1.50    6.30
   7 -14  -6   -3.40    9.50
  14   7   6    5.50    6.50
   6 -14  -6   -0.30    9.90
  14   6   6   -6.20    5.60
   5 -14  -6   -5.80    8.90
  14   5  -6    3.10    6.70
  14   5   6   -0.20    5.80
  14   4  -6   14.90    8.40
   4 -14  -6   12.70   10.90
  14   4   6   31.20    7.80
  14   3  -6    6.10    8.20
   3 -14  -6   17.70   10.90
  14   3   6   18.60    6.90
  14   2  -6   11.10    8.40
   2 -14  -6   -6.10    8.80
  14   2   6    5.50    5.80
   1 -14  -6   -7.40    8.70
  14   1  -6    2.30    8.40
  14   1   6    1.50    5.50
   0 -14  -6  -10.00    8.90
  14   0  -6   -4.60    8.20
  14   0   6   -1.40    5.30
  14  -1  -6   16.10    9.50
  -1 -14  -6   16.00   11.40
  14  -1   6   20.30    6.40
  14  -2  -6   11.00    9.70
  -2 -14  -6   22.30   11.80
  14  -2   6   21.70    6.50
  -3 -14  -6   32.40   12.80
  14  -3  -6    8.40    9.30
  14  -3   6   23.60    6.70
  -4 -14  -6    9.50   10.90
  14  -4  -6    3.10    9.10
  14  -4   6    1.00    4.70
  -5 -14  -6    5.80   11.20
  14  -5  -6   -2.30    8.90
  14  -5   6   -2.40    4.00
  14  -6  -6   18.50   11.00
  -6 -14  -6   26.70   13.30
  14  -7  -6   12.40   10.20
  -7 -14  -6   17.80   12.20
  14  -8  -6   17.70   11.30
   8  14   6   50.39   10.60
  14  -9  -6    6.20   10.00
   9  14   6    2.50    7.30
  14 -10  -6    8.10   10.50
  10  14   6    0.30    7.40
   9 -15  -6   -9.00    9.10
  15   9   6    2.90    6.40
   8 -15  -6    5.20   10.50
  15   8   6   19.70    7.70
   7 -15  -6    3.50   10.10
  15   7   6   14.00    6.80
   6 -15  -6   -4.80    9.20
  15   6   6    8.20    6.60
   5 -15  -6   -0.90    9.70
  15   5  -6   -3.00    7.20
  15   5   6    1.70    6.10
   4 -15  -6   -8.80    8.90
  15   4  -6   -4.50    7.20
  15   4   6   -0.70    5.50
   3 -15  -6   -4.60    9.00
  15   3  -6   -3.30    7.30
  15   3   6   -0.40    5.40
   2 -15  -6   -6.40    9.00
  15   2  -6   -3.50    7.80
  15   2   6   -2.20    5.40
   1 -15  -6   -4.40    9.50
  15   1  -6    0.20    8.60
  15   1   6   -3.80    5.20
  15   0  -6   -2.10    8.10
   0 -15  -6   -2.80    9.50
  15   0   6    3.80    5.60
  -1 -15  -6   -7.80    9.70
  15  -1  -6   -1.50    8.20
  15  -1   6   -2.60    4.90
  -2 -15  -6    4.10   10.40
  15  -2  -6    1.10    9.00
  15  -2   6    0.60    5.00
  15  -3  -6   18.90   10.00
  -3 -15  -6   17.20   12.20
  15  -3   6    9.00    5.30
  15  -4  -6   -4.10    8.90
  -4 -15  -6   -2.20   10.70
  15  -4   6   -2.90    4.20
  -5 -15  -6    5.60   11.70
  15  -5  -6   -1.70    9.70
  15  -5   6    4.20    4.60
  -6 -15  -6   10.40   12.00
  15  -6  -6   -4.60    9.40
  15  -7  -6   -3.40    9.20
  -7 -15  -6   12.40   12.00
  15  -8  -6    1.80   10.20
   8  15   6   12.70    7.90
  15  -9  -6    4.00   10.20
   9  15   6    4.50    7.90
   7 -16  -6   -0.60    9.70
  16   7   6    4.80    6.60
   6 -16  -6   -2.30    9.80
  16   6   6   12.10    7.20
   5 -16  -6   12.40   10.90
  16   5  -6   -4.90    9.50
  16   5   6    6.40    6.30
   4 -16  -6   21.20   11.60
  16   4  -6    4.80    8.70
  16   4   6   29.90    7.90
  16   3  -6   -8.60    7.50
   3 -16  -6    2.60    9.90
  16   3   6   -4.10    5.40
  16   2  -6    3.40    8.70
   2 -16  -6    8.80   10.50
  16   2   6    8.90    6.10
  16   1  -6   -0.10    8.80
   1 -16  -6    2.10   10.20
  16   1   6    4.10    6.00
   0 -16  -6   26.70   12.10
  16   0  -6   12.90   10.00
  16   0   6   29.10    7.30
  -1 -16  -6   -6.10   10.40
  16  -1  -6    2.50    9.20
  16  -1   6    6.40    5.60
  -2 -16  -6   27.10   12.50
  16  -2  -6   11.50   10.00
  16  -2   6   19.50    6.20
  16  -3  -6    1.70    9.40
  -3 -16  -6    5.70   10.90
  16  -3   6   15.60    5.60
  16  -4  -6   -5.00    8.90
  -4 -16  -6   -0.50   10.50
  16  -4   6    0.60    4.70
  16  -5  -6   -5.30    9.20
  -5 -16  -6   -0.50   10.60
  16  -5   6   -5.10    4.10
  16  -6  -6    2.20   10.00
  -6 -16  -6    3.00   12.00
  16  -7  -6    7.80   10.30
  17   4  -6   -0.10    8.60
   4 -17  -6   12.80   11.60
  17   4   6    0.20    6.40
   3 -17  -6   -1.70   10.10
  17   3  -6   -2.20    8.40
  17   3   6   -1.10    5.90
   2 -17  -6   25.80   12.40
  17   2  -6   15.90   10.20
  17   2   6    8.90    6.30
  17   1  -6   -9.10    7.90
   1 -17  -6    8.90   10.70
  17   1   6    5.90    5.80
  17   0  -6   -3.60    8.90
   0 -17  -6    9.80   10.70
  17   0   6    0.80    5.10
  17  -1  -6   24.30   11.00
  -1 -17  -6    6.40   11.30
  17  -1   6    3.90    5.10
  -2 -17  -6    2.00   10.90
  17  -2  -6    5.20    9.70
  17  -2   6    4.30    5.10
  17  -3  -6   18.10   10.80
  -3 -17  -6   10.60   11.70
  17  -3   6    1.70    4.90
  -4 -17  -6   10.70   12.60
  17  -4  -6   22.20   11.50
  17  -4   6   12.60    5.60
   0   0  -7   23.00    9.70
   0  -1  -7   32.50    9.70
   1   0  -7   17.50    9.40
  -1   0  -7   30.30   10.60
   0   1  -7   14.20    9.40
   1  -1  -7  208.18   20.10
  -1  -1  -7  218.48   21.00
  -1   1  -7  196.08   21.20
   2   1  -7   39.40   10.80
  -2  -1  -7   35.90   11.20
   1  -2  -7   65.99   11.70
  -1   2  -7   43.20   11.10
  -2   0  -7   -0.40    8.90
   2   0  -7   16.80    8.70
   0  -2  -7   24.90    9.40
   0   2  -7   32.80   10.10
   2  -1  -7   25.40    9.20
  -2   1  -7    9.90    9.90
  -1  -2  -7   26.70    9.60
   1   2  -7   26.80    9.40
   2   2  -7    9.40    8.20
  -2  -2  -7   -0.40    8.30
   2  -2  -7    8.40    8.00
  -2   2  -7   19.70    9.50
   2  -3  -7    8.10    8.50
  -3  -2  -7    9.40    9.20
  -2   3  -7   20.90    9.70
   3   2  -7   16.30    8.30
   1  -3  -7   29.00    9.70
   3   1  -7   37.60   10.10
  -3  -1  -7   15.90   10.50
  -1   3  -7   27.00   10.60
  -3   0  -7   21.30   10.20
   0  -3  -7   23.70    9.60
   0   3  -7   49.50   10.80
   3   0  -7   15.10    8.20
   1   3  -7   10.80    9.20
  -1  -3  -7    9.30    9.00
  -3   1  -7    6.50    9.50
   3  -1  -7    3.30    7.60
   2   3  -7   20.60    9.70
   3  -2  -7    5.00    7.80
  -2  -3  -7   -0.50    8.30
  -3   2  -7    6.20    9.00
  -3   3  -7   21.70    9.80
   3  -3  -7   12.30    8.80
  -3  -3  -7    5.50    9.20
   3   3  -7   12.80    8.80
   4   3  -7   21.70    8.50
  -3   4  -7    5.90    9.00
  -4  -3  -7   19.60   10.40
   3  -4  -7   18.20    9.20
   2  -4  -7    4.40    8.10
  -4  -2  -7   -5.10    8.40
  -2   4  -7   11.60    8.80
   4   2  -7    7.40    7.60
  -1   4  -7   14.20    8.80
   4   1  -7    0.20    7.50
  -4  -1  -7   -0.40    9.40
   1  -4  -7   18.60    9.20
   0  -4  -7    8.20    8.50
  -4   0  -7   -3.00    9.10
   0   4  -7   23.40    9.50
   4   0  -7    7.50    7.90
   4  -1  -7    5.60    8.20
   1   4  -7   10.00    8.90
  -1  -4  -7    4.50    8.60
  -4   1  -7   -1.20    9.60
   4  -2  -7   10.90    8.60
   2   4  -7   16.20    9.10
  -4   2  -7    9.20    9.70
  -2  -4  -7    6.50    9.30
   4  -3  -7   17.10    9.10
   3   4  -7   38.80    9.90
  -4   3  -7   28.90   11.40
  -3  -4  -7   20.20   10.50
   4   4  -7   21.80    8.60
  -4  -4  -7    3.30    9.00
   4  -4  -7   22.80    9.50
  -5  -4  -7    9.70    9.90
   5   4  -7   26.40    8.60
   4  -5  -7   19.80    9.60
   5   3  -7  104.39   14.10
   3  -5  -7  139.19   17.80
  -5  -3  -7   90.49   15.40
   5   2  -7   16.00    8.60
   2  -5  -7   18.00    9.50
  -5  -2  -7   10.30    9.90
  -5  -1  -7  134.29   17.90
   1  -5  -7  151.28   19.00
   5   1  -7  168.48   18.10
   5   0  -7   15.80    8.70
   0  -5  -7   29.70   10.40
  -5   0  -7   27.20   11.50
  -5   1  -7   16.10   11.30
   5  -1  -7   36.50    9.90
   5  -2  -7    6.60    8.20
  -5   2  -7   -6.30   10.60
  -2  -5  -7    4.60    9.30
   5  -3  -7   16.90    8.80
  -3  -5  -7   18.20   10.10
   5  -3   7   15.40    5.60
   5  -4  -7    3.20    8.00
  -4  -5  -7    1.10    9.40
   5  -4   7    3.80    4.50
   5  -5  -7   10.00    8.70
  -5  -5  -7   10.30   10.00
   5  -6  -7    0.40    8.20
  -6  -5  -7    5.70   10.20
  -6  -4  -7   -1.60    9.40
   6   4  -7    7.90    7.70
   4  -6  -7    1.10    8.30
   6   3  -7    9.30    8.20
  -6  -3  -7   -0.30    9.50
   3  -6  -7    7.10    8.70
  -6  -2  -7  -13.10    8.60
   2  -6  -7    2.00    8.50
   6   2  -7    8.40    7.70
   1  -6  -7   43.90   11.30
   6   1  -7   12.60    8.00
  -6  -1  -7   -1.90   10.00
   6   0  -7    7.00    7.90
  -6   0  -7    2.00   10.20
   0  -6  -7   -1.30    8.90
   6  -1  -7   11.80    8.30
  -1  -6  -7   -3.70    8.30
   6  -2  -7    7.80    7.70
  -2  -6  -7   -6.00    8.50
   6  -2   7    0.50    5.00
   6  -3  -7   -0.10    8.10
  -3  -6  -7   -9.90    8.40
   6  -3   7   -2.20    4.30
  -4  -6  -7   -1.70    9.50
   6  -4  -7    0.60    7.50
   6  -4   7   -1.70    4.30
  -5  -6  -7   -7.30    8.70
   6  -5  -7    4.40    8.40
  -6  -6  -7    4.60    9.70
   6  -6  -7   15.10    9.30
   6  -7  -7    7.80    9.40
  -7  -6  -7   10.80   10.90
   5  -7  -7    3.60    9.20
  -7  -5  -7   10.40   10.50
   7   4  -7   10.10    8.10
   4  -7  -7   -0.90    9.70
  -7  -4  -7   -5.70    9.50
  -7  -3  -7   12.00   11.00
   7   3  -7   22.40    9.10
   3  -7  -7    0.30    9.70
   7   2  -7   10.50    8.10
   2  -7  -7   -1.40    8.50
   1  -7  -7   15.30    9.90
   7   1  -7   23.90    8.90
   7   1   7   10.70    6.20
   0  -7  -7   -1.80    8.00
   7   0  -7   14.80    8.80
   7   0   7    1.80    5.60
  -1  -7  -7   -2.20    8.70
   7  -1  -7   10.30    8.10
   7  -1   7   -5.40    4.70
   7  -2  -7    4.40    7.70
  -2  -7  -7    6.30    9.70
   7  -2   7   10.30    5.60
   7  -3  -7   67.09   12.90
  -3  -7  -7   40.60   12.70
   7  -3   7   69.29    8.80
  -4  -7  -7  -13.40    9.30
   7  -4  -7   10.80    8.20
   7  -4   7    0.40    4.10
  -5  -7  -7   50.79   13.00
   7  -5  -7   71.99   13.40
  -6  -7  -7    9.00   10.70
   7  -6  -7    8.50    8.80
  -7  -7  -7    6.20   10.10
   7  -7  -7   15.30    9.30
   7  -8  -7    2.40    9.00
   6  -8  -7    8.70    9.20
   5  -8  -7   -1.30    8.60
   8   5   7   -4.10    5.90
   8   4  -7    5.30    7.90
   4  -8  -7    1.80    9.00
   8   4   7    0.10    5.90
   8   3  -7   10.50    8.60
   3  -8  -7   -5.70    8.60
   8   3   7    9.80    6.80
   2  -8  -7   -0.40    8.30
   8   2  -7    5.10    8.10
   8   2   7    4.50    6.00
   8   1  -7   19.40    8.80
   1  -8  -7   -0.80    8.60
   8   1   7   -1.10    5.40
   8   0  -7    8.50    7.70
   0  -8  -7    0.90    8.60
   8   0   7   -1.30    5.30
   8  -1  -7   13.10    8.50
  -1  -8  -7    5.00    9.10
   8  -1   7   -4.90    4.80
   8  -2  -7   -2.80    7.30
  -2  -8  -7    1.90    9.20
   8  -2   7    0.70    4.70
   8  -3  -7    7.20    8.50
  -3  -8  -7    3.50   10.20
   8  -3   7    9.20    5.10
   8  -4  -7   -1.10    7.60
  -4  -8  -7   -1.90    9.80
   8  -4   7   -4.70    4.00
   8  -5  -7   11.00    9.20
  -5  -8  -7   -2.60    9.30
   8  -6  -7    3.90    8.30
  -6  -8  -7   -2.20    9.70
  -7  -8  -7    7.70   10.50
   8  -7  -7   -3.50    8.20
  -8  -8  -7   14.00   11.40
   8  -8  -7    9.70    9.30
   8  -9  -7    4.20    9.60
   9   8   7    6.20    7.20
   7  -9  -7   51.39   13.50
   9   7   7   76.29   11.50
   6  -9  -7   10.80   10.00
   9   6   7    8.70    7.00
   5  -9  -7    5.50    9.70
   9   5   7    7.60    6.80
   9   4  -7   16.50    9.10
   4  -9  -7    4.50    9.50
   9   4   7    2.30    6.00
   3  -9  -7   71.29   14.30
   9   3  -7   97.19   14.30
   9   3   7   89.99   11.70
   9   2  -7    7.40    8.20
   2  -9  -7   -1.30    9.10
   9   2   7    3.20    5.90
   1  -9  -7   16.00   10.70
   9   1  -7   22.00    9.70
   9   1   7   29.10    7.50
   9   0  -7    4.40    8.00
   0  -9  -7    1.30    9.20
   9   0   7    3.80    5.50
   9  -1  -7    5.70    8.10
  -1  -9  -7    7.40    9.50
   9  -1   7   -4.40    4.90
  -2  -9  -7   13.80   10.40
   9  -2  -7   -0.90    8.20
   9  -2   7   -2.80    5.00
  -3  -9  -7   -0.70    9.50
   9  -3  -7    4.70    9.00
   9  -3   7    6.30    5.00
  -4  -9  -7    5.90   10.20
   9  -4  -7   -5.80    8.00
   9  -4   7    0.10    4.50
  -5  -9  -7   -2.20    9.80
   9  -5  -7    0.30    8.50
  -6  -9  -7   13.40   10.70
   9  -6  -7    1.10    8.30
   9  -7  -7    6.30    9.30
  -7  -9  -7    5.50   11.40
   9  -8  -7    5.80    9.10
  -8  -9  -7    2.10   10.90
   9  -9  -7   48.40   12.90
   9   9   7   42.30    9.90
   9 -10  -7    3.10   10.00
  10   9   7   -3.70    6.90
   8 -10  -7    2.50    9.40
  10   8   7    0.90    7.20
   7 -10  -7    4.30    9.10
  10   7   7   -0.30    6.50
   6 -10  -7   -4.70    8.40
  10   6   7   10.90    7.10
   5 -10  -7    1.20    9.20
  10   5   7    0.50    6.30
  10   4  -7   12.70   10.40
   4 -10  -7   -2.50    9.00
  10   4   7   11.70    7.10
  10   3  -7   17.40    8.10
   3 -10  -7    0.20    8.50
  10   3   7   10.00    6.70
   2 -10  -7   -2.90    8.10
  10   2  -7    5.80    8.10
  10   2   7    4.90    6.00
   1 -10  -7    0.00    8.90
  10   1  -7    2.40    7.80
  10   1   7    7.60    5.80
  10   0  -7    4.20    8.00
   0 -10  -7    8.50    9.60
  10   0   7    3.50    5.30
  10  -1  -7    2.10    8.20
  -1 -10  -7   12.70    9.90
  10  -1   7    3.40    5.20
  -2 -10  -7   32.30   11.30
  10  -2  -7    1.50    8.20
  10  -2   7   -0.10    5.20
  -3 -10  -7    7.60   10.50
  10  -3  -7    5.40    8.90
  10  -3   7   -0.30    4.90
  -4 -10  -7    7.20   10.40
  10  -4  -7    6.50    9.10
  10  -4   7   -0.60    4.40
  10  -5  -7   -9.90    8.40
  -5 -10  -7  -11.30    9.70
  10  -6  -7   -4.60    8.30
  -6 -10  -7   11.20   11.10
  10  -7  -7    5.60    9.50
  -7 -10  -7    6.70   11.00
  -8 -10  -7    2.50   10.50
  10  -8  -7    0.40    9.20
  10  -9  -7   13.30   10.30
   9  10   7    9.70    7.50
  10 -10  -7    1.50    9.50
  10  10   7    2.30    7.20
  10 -11  -7    5.90   10.00
  11  10   7   -2.40    7.30
   9 -11  -7   -4.20    9.00
  11   9   7    4.70    7.40
   8 -11  -7    5.40    9.80
  11   8   7    8.70    7.80
   7 -11  -7    9.10   10.30
  11   7   7   10.70    7.70
   6 -11  -7   -6.40    8.40
  11   6   7   -0.60    6.50
   5 -11  -7    5.00    9.40
  11   5   7    1.60    6.30
   4 -11  -7   20.70   10.40
  11   4   7   14.70    7.30
  11   3  -7   78.09   13.20
   3 -11  -7   93.59   15.70
  11   3   7   99.99   13.10
  11   2  -7    6.90    8.10
   2 -11  -7   -2.00    9.20
  11   2   7    6.90    6.10
   1 -11  -7   23.10   10.80
  11   1  -7   25.30   10.30
  11   1   7   32.70    8.10
  11   0  -7    8.70    9.20
   0 -11  -7   12.50   10.50
  11   0   7    4.10    5.70
  11  -1  -7   32.00   10.90
  -1 -11  -7   38.10   12.60
  11  -1   7   36.20    7.60
  11  -2  -7   11.80    9.40
  -2 -11  -7   20.10   10.90
  11  -2   7   10.00    5.70
  11  -3  -7   62.39   13.90
  -3 -11  -7   63.99   14.60
  11  -3   7   67.59    9.00
  -4 -11  -7    7.20    9.90
  11  -4  -7    2.20    9.30
  11  -4   7    1.50    4.90
  -5 -11  -7    3.70   10.00
  11  -5  -7   -0.60    9.00
  -6 -11  -7    5.30   11.20
  11  -6  -7    1.70    8.70
  -7 -11  -7   17.40   12.40
  11  -7  -7    6.50    9.80
  11  -8  -7   -0.30    9.20
  11  -9  -7    6.90   10.00
   9  11   7    4.90    7.90
  11 -10  -7   10.70   10.40
  10  11   7   -3.60    6.80
   9 -12  -7   -3.10    9.70
  12   9   7    0.90    6.70
   8 -12  -7   -0.20    9.40
  12   8   7    0.80    6.70
   7 -12  -7    2.90    9.50
  12   7   7    1.30    6.60
   6 -12  -7   -4.20    9.70
  12   6   7   -3.60    6.20
   5 -12  -7   -6.60    9.40
  12   5   7    1.10    6.20
   4 -12  -7   -0.20    9.80
  12   4   7    2.80    6.30
   3 -12  -7   11.70   10.40
  12   3  -7    7.50    7.90
  12   3   7   10.80    7.00
   2 -12  -7    3.60    9.40
  12   2  -7    7.00    8.40
  12   2   7    2.00    6.30
   1 -12  -7   12.20   10.20
  12   1  -7   10.20    8.70
  12   1   7    1.60    5.90
  12   0  -7   10.30    9.00
   0 -12  -7    1.10    9.80
  12   0   7    3.50    5.60
  -1 -12  -7   12.90   10.90
  12  -1  -7    8.00    9.20
  12  -1   7    1.90    5.20
  -2 -12  -7    7.40   10.80
  12  -2  -7   -0.20    9.00
  12  -2   7    1.10    4.90
  -3 -12  -7   -2.10   10.00
  12  -3  -7   11.20    9.90
  12  -3   7    6.10    5.40
  -4 -12  -7    5.20   10.90
  12  -4  -7   11.70   10.10
  12  -4   7    4.90    5.50
  -5 -12  -7   -3.20   10.50
  12  -5  -7   -2.00    8.80
  -6 -12  -7    6.50   11.40
  12  -6  -7    3.60    9.50
  12  -7  -7    6.90   10.00
  -7 -12  -7   -2.10   10.60
  12  -8  -7   -1.10    9.10
  12  -9  -7   -5.00    9.20
   9  12   7    2.60    7.50
   7 -13  -7   -1.10    9.60
  13   7   7   -1.30    6.70
   6 -13  -7    0.00    9.20
  13   6   7    6.60    6.90
   5 -13  -7    3.40    9.80
  13   5   7    3.70    6.70
   4 -13  -7    3.70    9.70
  13   4   7   -1.30    6.10
  13   3  -7   -1.80    7.40
   3 -13  -7    1.50   10.10
  13   3   7   -3.90    5.80
   2 -13  -7    2.00   10.30
  13   2  -7   -1.20    8.00
  13   2   7   -6.40    5.60
   1 -13  -7  -11.10    9.10
  13   1  -7   -3.00    8.50
  13   1   7   13.00    6.80
  13   0  -7    8.70    9.40
   0 -13  -7   -3.40   10.00
  13   0   7    3.00    5.60
  13  -1  -7   35.10   11.90
  -1 -13  -7   18.20   12.10
  13  -1   7   44.00    8.20
  -2 -13  -7   -4.10   10.30
  13  -2  -7   10.40    9.50
  13  -2   7   -2.00    5.20
  -3 -13  -7   41.90   14.20
  13  -3  -7   36.80   12.50
  13  -3   7   40.20    7.70
  13  -4  -7   -1.20    9.20
  -4 -13  -7    3.80   11.50
  13  -4   7   -5.20    6.40
  -5 -13  -7   -3.70   10.80
  13  -5  -7    3.40    9.70
  -6 -13  -7    3.70   11.40
  13  -6  -7   -1.40   10.00
  -7 -13  -7   43.90   14.30
  13  -7  -7   34.90   13.00
   5 -14  -7    1.20   10.40
  14   5   7   -7.40    5.70
   4 -14  -7    4.30   10.30
  14   4   7   -2.70    5.90
  14   3  -7    2.10    8.00
   3 -14  -7   10.60   11.50
  14   3   7    0.80    6.20
  14   2  -7   -1.00    8.80
   2 -14  -7    0.30    9.80
  14   2   7   -0.50    5.70
   1 -14  -7   -8.90    9.40
  14   1  -7   -1.30    8.80
  14   1   7   -5.50    5.30
  14   0  -7   -3.50    8.90
   0 -14  -7   -4.30    9.70
  14   0   7   -1.00    5.70
  -1 -14  -7   -2.00   10.40
  14  -1  -7    1.00    9.30
  14  -1   7    2.50    6.00
  -2 -14  -7   12.20   12.10
  14  -2  -7    0.40    9.20
  14  -2   7   -4.40    5.30
  -3 -14  -7   -1.00   10.50
  14  -3  -7   -1.00    9.30
  14  -3   7   -6.60    5.10
  14  -4  -7    7.60   10.20
  -4 -14  -7   -0.40   11.10
  14  -5  -7    7.50   10.00
  -5 -14  -7   -0.40   11.30
  15   2  -7   -4.40    8.80
   2 -15  -7    2.50   10.10
   1 -15  -7    1.00   10.30
  15   1  -7    1.70    9.30
  15   1   7   -5.10    5.50
  15   0  -7    0.60    9.30
   0 -15  -7  -10.20    9.70
  15   0   7    4.50    5.90
  -1 -15  -7    6.40   11.70
  15  -1  -7    7.80   10.20
  15  -1   7    0.70    6.00
  15  -2  -7    2.50   10.20
  -2 -15  -7    4.60   11.50
   0   0  -8  154.18   20.40
   0   1  -8   10.00    9.70
   1   0  -8   39.00   11.20
  -1   0  -8   12.80    9.90
   0  -1  -8   14.20    9.60
   1  -1  -8   15.60    9.70
   1   1  -8   28.90   11.30
  -1  -1  -8   14.80   10.00
  -1   1  -8    9.00    9.80
  -2  -1  -8   28.90   11.60
   1  -2  -8   32.30   10.70
  -1   2  -8   29.40   11.50
   2   1  -8   34.40   10.90
  -2   0  -8   17.60   10.60
   0  -2  -8   26.50   10.40
   0   2  -8   38.20   12.00
   2   0  -8   26.50   10.60
   2  -1  -8   19.30   10.10
  -1  -2  -8   33.90   11.60
  -2   1  -8   38.70   11.60
   1   2  -8   22.80   10.40
   2  -2  -8   17.20    9.80
   2   2  -8   10.00    9.40
  -2   2  -8   27.30   11.00
  -2  -2  -8   13.80    9.90
   3   2  -8   22.00   10.60
  -3  -2  -8   22.40   11.00
   2  -3  -8    8.60    9.10
   1  -3  -8   12.70    8.90
   3   1  -8    0.10    8.60
  -3  -1  -8   14.20   10.20
   0  -3  -8   23.20   10.10
   3   0  -8   12.20    9.40
  -3   0  -8   19.30   10.60
  -3   1  -8    8.90   10.20
  -1  -3  -8   17.80   10.30
   3  -1  -8   12.90    9.10
   3  -2  -8   15.80    9.20
  -3   2  -8    5.10    9.90
  -2  -3  -8    8.50    9.70
  -3  -3  -8   -1.50    9.10
   3  -3  -8    9.60    8.90
  -4  -3  -8   19.70   11.00
   3  -4  -8   17.10   10.10
   4   2  -8   42.80   11.30
   2  -4  -8   38.00   12.20
  -4  -2  -8   45.80   12.60
   1  -4  -8    4.60    9.50
  -4  -1  -8    5.00   10.30
   4   1  -8    7.70    8.70
   0  -4  -8   25.10   11.00
  -4   0  -8   29.40   12.00
   4   0  -8   18.20    9.70
  -4   1  -8   -5.90    9.70
  -1  -4  -8   -1.90    9.50
   4  -1  -8    6.10    8.50
  -4   2  -8   -3.00   10.20
  -2  -4  -8   -2.00    9.80
   4  -2  -8    6.30    8.30
  -3  -4  -8    0.00   10.10
   4  -3  -8    1.40    8.40
   4  -4  -8    4.10    9.30
  -4  -4  -8   -5.30    9.70
   4  -5  -8    1.40    8.50
  -5  -4  -8   -2.10    9.70
   3  -5  -8    3.30    8.60
  -5  -3  -8    6.50   10.30
   2  -5  -8   11.10    9.40
   5   2  -8    2.90    8.80
  -5  -2  -8   -4.80   10.30
   1  -5  -8   16.70    9.80
  -5  -1  -8    9.60   10.60
   5   1  -8   14.60    9.10
   0  -5  -8    6.70    9.60
  -5   0  -8   -1.60   10.30
   5   0  -8   13.40    8.90
  -1  -5  -8    0.70    9.40
   5  -1  -8   10.80    8.80
  -5   1  -8    3.20   11.10
  -2  -5  -8    4.30   10.20
   5  -2  -8   13.30    8.70
   5  -3  -8   -6.40    8.00
  -3  -5  -8   -7.30    9.00
  -4  -5  -8   -6.40    9.30
   5  -4  -8    8.00    9.10
   5  -5  -8    5.80    8.70
  -5  -5  -8    7.40   10.70
  -6  -5  -8    1.30   10.50
   5  -6  -8   16.30    9.70
   4  -6  -8   17.70    9.50
  -6  -4  -8    2.70   10.40
   3  -6  -8    6.80    9.30
  -6  -3  -8    0.40   10.50
   2  -6  -8   12.50   10.20
   6   2  -8   16.50    9.80
  -6  -2  -8   19.40   11.60
   6   1  -8   15.20    9.20
  -6  -1  -8    1.70   10.20
   1  -6  -8    9.70    9.60
   0  -6  -8   16.40   10.40
   6   0  -8   26.90    9.90
   6  -1  -8   20.00    9.60
  -1  -6  -8    3.60    9.60
   6  -1   8    5.30    6.30
   6  -2  -8   15.40    9.20
  -2  -6  -8    9.90   10.70
   6  -2   8    4.10    6.00
  -3  -6  -8   16.60   11.30
   6  -3  -8   16.90   10.10
   6  -4  -8   17.70   10.40
  -4  -6  -8   27.40   11.80
   6  -5  -8    4.40    9.30
  -5  -6  -8    1.30   10.30
   6  -6  -8    1.70    8.80
  -6  -6  -8    1.00   10.20
  -7  -6  -8    0.50   10.50
   6  -7  -8    8.00    8.90
  -7  -5  -8    3.70   11.20
   5  -7  -8    4.20    8.90
  -7  -4  -8    0.20   10.20
   4  -7  -8   12.20    9.90
   3  -7  -8   10.90    9.30
   2  -7  -8    3.40    8.90
   7   2  -8    4.50    8.70
   7   2   8   14.60    7.20
   7   1  -8    9.40    8.40
   1  -7  -8   15.50    9.50
   7   1   8   -0.60    5.80
   7   0  -8    2.60    8.20
   0  -7  -8    0.30    8.80
   7   0   8    2.80    6.10
  -1  -7  -8    2.60    9.30
   7  -1  -8    0.20    8.10
   7  -1   8   -2.20    5.70
  -2  -7  -8   -3.20    8.90
   7  -2  -8    6.20    8.50
   7  -2   8   -0.90    5.50
  -3  -7  -8    4.80   10.20
   7  -3  -8    5.40    9.40
  -4  -7  -8    5.00   10.50
   7  -4  -8   -3.60    8.40
  -5  -7  -8    6.00   10.80
   7  -5  -8   -1.60    8.80
  -6  -7  -8    7.60   11.10
   7  -6  -8    0.00    9.10
  -7  -7  -8   -2.50   10.20
   7  -7  -8    3.30    9.60
   7  -8  -8    8.60   10.20
   8   7   8    7.10    7.60
   6  -8  -8   22.10   10.90
   8   6   8    7.40    7.30
   5  -8  -8   10.10   10.00
   8   5   8    6.70    7.00
   4  -8  -8   13.20   10.60
   8   4   8    6.10    7.20
   3  -8  -8   16.00   10.40
   8   3   8   43.70    8.80
   2  -8  -8    9.90    9.90
   8   2  -8   19.40    9.60
   8   2   8   13.30    7.00
   8   1  -8   15.20    9.30
   1  -8  -8   13.90   10.30
   8   1   8    3.30    6.30
   0  -8  -8   15.80   10.50
   8   0  -8    8.10    8.90
   8   0   8   -0.70    6.00
  -1  -8  -8   -4.40    9.00
   8  -1  -8   14.00    9.10
   8  -1   8   -4.00    5.50
  -2  -8  -8    1.60    9.70
   8  -2  -8    6.30    8.70
   8  -2   8   -3.80    5.10
   8  -3  -8    2.30    8.80
  -3  -8  -8   -1.60    9.60
  -4  -8  -8   10.40   11.00
   8  -4  -8   18.30   10.40
   8  -5  -8    6.10    9.50
  -5  -8  -8    6.80   11.40
  -6  -8  -8    4.70   11.00
   8  -6  -8   -3.30    8.50
  -7  -8  -8   11.00   12.00
   8  -7  -8   -7.30    8.40
   8  -8  -8   -2.30    9.10
   8   8   8   13.60    8.10
   7  -9  -8    2.10    9.60
   9   7   8   -0.50    6.90
   6  -9  -8    0.30    9.70
   9   6   8    6.00    7.30
   5  -9  -8   -9.40    8.50
   9   5   8    5.90    7.00
   4  -9  -8   -2.10    8.90
   9   4   8   -3.20    6.30
   3  -9  -8    2.70    9.70
   9   3   8    4.10    6.80
   2  -9  -8   13.70   10.60
   9   2  -8   18.50    9.50
   9   2   8   12.60    7.10
   1  -9  -8    7.80   10.10
   9   1  -8    8.80    8.60
   9   1   8    7.60    6.70
   0  -9  -8   -2.60    9.00
   9   0  -8    5.00    8.10
   9   0   8    6.00    6.40
  -1  -9  -8   19.30   11.10
   9  -1  -8   10.00    8.70
   9  -1   8   -2.70    5.60
   9  -2  -8    7.50    9.60
  -2  -9  -8   13.10   11.00
   9  -2   8    8.60    5.80
  -3  -9  -8   -1.70   10.30
   9  -3  -8    7.60    9.60
   9  -4  -8    1.70    8.80
  -4  -9  -8   -2.60   10.20
   9  -5  -8    6.10    9.30
  -5  -9  -8    9.50   11.30
   9  -6  -8   -2.30    8.60
  -6  -9  -8    2.20   11.40
   9  -7  -8    0.20    9.50
  -7  -9  -8   -6.40   10.10
   6 -10  -8   11.00   10.50
   5 -10  -8    8.20   10.50
  10   5   8   -5.80    6.40
   4 -10  -8   25.90   11.60
  10   4   8   20.30    8.40
   3 -10  -8    0.60    9.70
  10   3   8    8.00    6.90
  10   2  -8   48.00   13.30
   2 -10  -8   39.00   13.00
  10   2   8   39.40    9.20
  10   1  -8    7.00    8.40
   1 -10  -8    5.00   10.30
  10   1   8    2.20    6.20
  10   0  -8    5.80    9.00
   0 -10  -8   10.80   10.30
  10   0   8   -0.20    6.10
  -1 -10  -8    4.00   10.30
  10  -1  -8   16.80   10.10
  10  -1   8    7.90    6.20
  -2 -10  -8   22.80   11.80
  10  -2  -8   14.40   10.20
  10  -2   8    7.90    6.10
  10  -3  -8    5.90    9.50
  -3 -10  -8   13.10   11.30
  -4 -10  -8   -0.20   10.50
  10  -4  -8    8.00   10.00
  -5 -10  -8   11.50   11.70
  10  -5  -8    2.30    9.80
  10  -6  -8    2.70    9.20
   4 -11  -8   13.40   10.20
   3 -11  -8    2.00    9.70
  11   3   8    0.90    6.40
   2 -11  -8    6.20   10.10
  11   2  -8   23.80   16.70
  11   2   8    1.40    6.20
  11   1  -8   14.10    9.50
   1 -11  -8    7.00   10.00
  11   1   8    0.90    6.00
  11   0  -8    8.40    9.30
   0 -11  -8    8.30   10.90
  11   0   8    8.60    6.40
  11  -1  -8    6.50    9.60
  -1 -11  -8   22.90   12.10
  11  -1   8    0.50    5.70
  11  -2  -8    8.00    9.50
  -2 -11  -8    3.00    9.90
  11  -2   8    4.30    5.80
  11  -3  -8    4.80    9.40
  -3 -11  -8    9.50   11.20
  11  -4  -8   14.00   10.40
  -4 -11  -8   -5.00    9.80
   0   0  -9    7.30   10.20
   0  -1  -9   -3.30    9.40
  -1   0  -9    3.00    9.40
   1   0  -9    8.40   10.00
   1  -1  -9    8.40   10.30
  -1  -1  -9    6.20   10.40
   1  -2  -9   -4.00    9.60
  -2  -1  -9    4.80   10.60
  -2   0  -9    7.00   10.20
   0  -2  -9    7.10   10.30
   2   0  -9    2.50    9.30
  -1  -2  -9    4.40   10.70
   2  -1  -9    1.40    9.40
   2  -2  -9   -5.40    9.00
  -2  -2  -9    3.20   10.30
  -3  -2  -9    3.70   10.50
   2  -3  -9    3.40    9.60
   1  -3  -9    5.30   10.00
  -3  -1  -9    3.70   10.10
   0  -3  -9    7.40   10.40
  -3   0  -9   14.70   11.20
   3   0  -9   17.00   10.80
   3  -1  -9    4.80    9.00
  -1  -3  -9   -4.30    9.40
   3  -2  -9    2.40    9.40
  -2  -3  -9   -1.90    9.80
  -3  -3  -9   10.00   10.90
   3  -3  -9   13.10   10.60
   3  -4  -9   -2.70    9.20
  -4  -3  -9    0.70   10.40
   2  -4  -9    2.70    9.60
  -4  -2  -9    3.30   10.80
  -4  -1  -9   11.20   11.00
   1  -4  -9   -2.30    9.30
   4   0  -9   -4.60    9.10
   0  -4  -9    3.90   10.20
  -4   0  -9    1.00   10.80
   4  -1  -9    9.00    9.70
  -1  -4  -9   -2.50    9.70
  -2  -4  -9   13.00   11.40
   4  -2  -9   22.30   11.40
  -3  -4  -9   -1.10   10.10
   4  -3  -9   -5.00    9.00
  -4  -4  -9    6.00   10.80
   4  -4  -9    0.40    9.30
  -5  -2  -9   -3.30   10.50
   2  -5  -9   13.60   10.30
  -5  -1  -9    1.50   10.10
   1  -5  -9    7.00    9.90
   5   0  -9    4.80    9.40
   0  -5  -9    7.60   10.30
  -1  -5  -9    3.20    9.50
   5  -1  -9   12.80    9.90
   5  -2  -9    3.80    9.20
  -2  -5  -9    9.90   10.70

_computing_structure_solution     'SHELXT 2014/4 (Sheldrick, 2014)'
;
_shelx_hkl_checksum                33724
_olex2_submission_special_instructions  'No special instructions were received'
