# Supplementary material for: Various Approaches to Studying the Phase Transition in an Octamethylcyclotetrasiloxane Crystal: From X-ray Structural Analysis to Metadynamics
Source: Int J Mol Sci. 2022 Aug 13;23(16):9073. doi: 10.3390/ijms23169073 (PMC9408834; doi:10.3390/ijms23169073)
Supplement: Supplementary file 1 [file ijms-23-09073-s001.zip › 1-11_240.cif]

data_240
_audit_creation_date               2021-12-16
_audit_creation_method
;
Olex2 1.5
(compiled 2021.12.09 svn.r5202d8cf for OlexSys, GUI svn.r6439)
;
_shelxl_version_number             2014/6
_audit_contact_author_address      ?
_audit_contact_author_email        ?
_audit_contact_author_name         ''
_audit_contact_author_phone        ?
_publ_contact_author_id_orcid      ?
_publ_section_references
;
Dolomanov, O.V., Bourhis, L.J., Gildea, R.J, Howard, J.A.K. & Puschmann, H.
 (2009), J. Appl. Cryst. 42, 339-341.

Sheldrick, G.M. (2015). Acta Cryst. A71, 3-8.

Sheldrick, G.M. (2015). Acta Cryst. C71, 3-8.
;
_chemical_name_common              ?
_chemical_name_systematic          ?
_chemical_formula_moiety           'C8 H24 O4 Si4'
_chemical_formula_sum              'C8 H24 O4 Si4'
_chemical_formula_weight           296.63
_chemical_melting_point            ?
loop_
  _atom_type_symbol
  _atom_type_description
  _atom_type_scat_dispersion_real
  _atom_type_scat_dispersion_imag
  _atom_type_scat_source
 'C' 'C' 0.0033 0.0016 'International Tables Vol C Tables 4.2.6.8 and 6.1.1.4'
 'H' 'H' 0.0000 0.0000 'International Tables Vol C Tables 4.2.6.8 and 6.1.1.4'
 'O' 'O' 0.0106 0.0060 'International Tables Vol C Tables 4.2.6.8 and 6.1.1.4'
 'Si' 'Si' 0.0817 0.0704 'International Tables Vol C Tables 4.2.6.8 and 6.1.1.4'

_shelx_space_group_comment
;
The symmetry employed for this shelxl refinement is uniquely defined
by the following loop, which should always be used as a source of
symmetry information in preference to the above space-group names.
They are only intended as comments.
;
_space_group_crystal_system        'tetragonal'
_space_group_IT_number             88
_space_group_name_H-M_alt          'I 41/a'
_space_group_name_Hall             '-I 4ad'
loop_
  _space_group_symop_operation_xyz
 'x, y, z'
 '-x+1/2, -y, z+1/2'
 '-y+3/4, x+1/4, z+1/4'
 'y+3/4, -x+3/4, z+3/4'
 'x+1/2, y+1/2, z+1/2'
 '-x+1, -y+1/2, z+1'
 '-y+5/4, x+3/4, z+3/4'
 'y+5/4, -x+5/4, z+5/4'
 '-x, -y, -z'
 'x-1/2, y, -z-1/2'
 'y-3/4, -x-1/4, -z-1/4'
 '-y-3/4, x-3/4, -z-3/4'
 '-x+1/2, -y+1/2, -z+1/2'
 'x, y+1/2, -z'
 'y-1/4, -x+1/4, -z+1/4'
 '-y-1/4, x-1/4, -z-1/4'

_cell_length_a                     16.0850(16)
_cell_length_b                     16.0850(16)
_cell_length_c                     6.8911(9)
_cell_angle_alpha                  90
_cell_angle_beta                   90
_cell_angle_gamma                  90
_cell_volume                       1782.9(4)
_cell_formula_units_Z              4
_cell_measurement_reflns_used      2278
_cell_measurement_temperature      240
_cell_measurement_theta_max        27.105
_cell_measurement_theta_min        2.536
_shelx_estimated_absorpt_T_max     0.907
_shelx_estimated_absorpt_T_min     0.852
_exptl_absorpt_coefficient_mu      0.331
_exptl_absorpt_correction_T_max    0.7461
_exptl_absorpt_correction_T_min    0.5597
_exptl_absorpt_correction_type     multi-scan
_exptl_absorpt_process_details
;
SADABS-2014/5 (Bruker,2014/5) was used for absorption correction.
wR2(int) was 0.1515 before and 0.0379 after correction.
The Ratio of minimum to maximum transmission is 0.7502.
The \l/2 correction factor is 0.00150.
;
_exptl_absorpt_special_details     ?
_exptl_crystal_colour              colourless
_exptl_crystal_colour_primary      colourless
_exptl_crystal_density_diffrn      1.105
_exptl_crystal_density_meas        .
_exptl_crystal_density_method      ?
_exptl_crystal_description         irregular
_exptl_crystal_F_000               640
_exptl_crystal_recrystallization_method  'in situ, in 0.3 mm capillary'
_exptl_crystal_size_max            0.5
_exptl_crystal_size_mid            0.3
_exptl_crystal_size_min            0.3
_exptl_transmission_factor_max     ?
_exptl_transmission_factor_min     ?
_diffrn_reflns_av_R_equivalents    0.0398
_diffrn_reflns_av_unetI/netI       0.0403
_diffrn_reflns_Laue_measured_fraction_full  1.000
_diffrn_reflns_Laue_measured_fraction_max  0.995
_diffrn_reflns_limit_h_max         15
_diffrn_reflns_limit_h_min         -23
_diffrn_reflns_limit_k_max         19
_diffrn_reflns_limit_k_min         -19
_diffrn_reflns_limit_l_max         9
_diffrn_reflns_limit_l_min         -9
_diffrn_reflns_number              6271
_diffrn_reflns_point_group_measured_fraction_full  1.000
_diffrn_reflns_point_group_measured_fraction_max  0.995
_diffrn_reflns_theta_full          25.242
_diffrn_reflns_theta_max           30.714
_diffrn_reflns_theta_min           2.532
_diffrn_ambient_temperature        240
_diffrn_detector                   'CCD area detector'
_diffrn_detector_area_resol_mean   8
_diffrn_detector_type              'Bruker SMART CCD 1K area detector'
_diffrn_measured_fraction_theta_full  1.000
_diffrn_measured_fraction_theta_max  0.995
_diffrn_measurement_device         'three-circle diffractometer'
_diffrn_measurement_device_type    'Bruker APEX-II CCD'
_diffrn_measurement_method         '\w and \f scans'
_diffrn_radiation_monochromator    graphite
_diffrn_radiation_probe            x-ray
_diffrn_radiation_type             MoK\a
_diffrn_radiation_wavelength       0.71073
_diffrn_source                     'sealed tube'
_diffrn_source_current             30.0
_diffrn_source_power               1.5
_diffrn_source_target              Mo
_diffrn_source_voltage             50.0
_reflns_Friedel_coverage           0.000
_reflns_Friedel_fraction_full      .
_reflns_Friedel_fraction_max       .
_reflns_number_gt                  816
_reflns_number_total               1376
_reflns_special_details
;
 Reflections were merged by SHELXL according to the crystal
 class for the calculation of statistics and refinement.
 
 _reflns_Friedel_fraction is defined as the number of unique
 Friedel pairs measured divided by the number that would be
 possible theoretically, ignoring centric projections and
 systematic absences.
;
_reflns_threshold_expression       'I > 2\s(I)'
_computing_cell_refinement         'SAINT v8.34A (Bruker, 2013)'
_computing_data_collection         ?
_computing_data_reduction          'SAINT v8.34A (Bruker, 2013)'
_computing_molecular_graphics      'Olex2 1.5 (Dolomanov et al., 2009)'
_computing_publication_material    'Olex2 1.5 (Dolomanov et al., 2009)'
_computing_structure_refinement    'SHELXL 2014/6 (Sheldrick, 2015)'
_computing_structure_solution      'SHELXT 2014/4 (Sheldrick, 2014)'
_refine_diff_density_max           0.394
_refine_diff_density_min           -0.279
_refine_diff_density_rms           0.051
_refine_ls_extinction_coef         .
_refine_ls_extinction_method       none
_refine_ls_goodness_of_fit_ref     1.090
_refine_ls_hydrogen_treatment      constr
_refine_ls_matrix_type             full
_refine_ls_number_parameters       39
_refine_ls_number_reflns           1376
_refine_ls_number_restraints       0
_refine_ls_R_factor_all            0.0971
_refine_ls_R_factor_gt             0.0545
_refine_ls_restrained_S_all        1.090
_refine_ls_shift/su_max            0.001
_refine_ls_shift/su_mean           0.000
_refine_ls_structure_factor_coef   Fsqd
_refine_ls_weighting_details      
 'w=1/[\s^2^(Fo^2^)+(0.0754P)^2^+0.9743P] where P=(Fo^2^+2Fc^2^)/3'
_refine_ls_weighting_scheme        calc
_refine_ls_wR_factor_gt            0.1545
_refine_ls_wR_factor_ref           0.1724
_refine_special_details            ?
_olex2_refinement_description
;
1.a Idealised Me refined as rotating group:
 C3(H3A,H3B,H3C), C4(H4A,H4B,H4C)
;
_atom_sites_solution_hydrogens     geom
_atom_sites_solution_primary       dual
_atom_sites_solution_secondary     ?
loop_
  _atom_site_label
  _atom_site_type_symbol
  _atom_site_fract_x
  _atom_site_fract_y
  _atom_site_fract_z
  _atom_site_U_iso_or_equiv
  _atom_site_adp_type
  _atom_site_occupancy
  _atom_site_site_symmetry_order
  _atom_site_calc_flag
  _atom_site_refinement_flags_posn
  _atom_site_refinement_flags_adp
  _atom_site_refinement_flags_occupancy
  _atom_site_disorder_assembly
  _atom_site_disorder_group
 Si1 Si 0.93196(4) 0.36667(4) 0.08543(12) 0.0549(3) Uani 1 1 d . . . . .
 O1 O 1.03187(10) 0.35849(12) 0.0782(3) 0.0698(6) Uani 1 1 d . . . . .
 C3 C 0.8949(3) 0.3869(3) -0.1602(6) 0.1148(15) Uani 1 1 d . . . . .
 H3A H 0.9208 0.4371 -0.2096 0.172 Uiso 1 1 calc R U . . .
 H3B H 0.8350 0.3940 -0.1584 0.172 Uiso 1 1 calc R U . . .
 H3C H 0.9092 0.3404 -0.2434 0.172 Uiso 1 1 calc R U . . .
 C4 C 0.9020(3) 0.45239(19) 0.2471(6) 0.1035(14) Uani 1 1 d . . . . .
 H4A H 0.9180 0.4390 0.3792 0.155 Uiso 1 1 calc R U . . .
 H4B H 0.8423 0.4604 0.2409 0.155 Uiso 1 1 calc R U . . .
 H4C H 0.9299 0.5030 0.2066 0.155 Uiso 1 1 calc R U . . .

loop_
  _atom_site_aniso_label
  _atom_site_aniso_U_11
  _atom_site_aniso_U_22
  _atom_site_aniso_U_33
  _atom_site_aniso_U_23
  _atom_site_aniso_U_13
  _atom_site_aniso_U_12
 Si1 0.0440(4) 0.0480(4) 0.0727(6) 0.0140(3) 0.0009(3) 0.0018(3)
 O1 0.0452(10) 0.0607(11) 0.1037(16) 0.0196(10) -0.0103(10) -0.0011(8)
 C3 0.090(3) 0.156(4) 0.098(3) 0.043(3) -0.034(2) -0.028(2)
 C4 0.122(3) 0.0542(19) 0.134(3) -0.001(2) 0.042(3) 0.0018(18)

_geom_special_details
;
 All esds (except the esd in the dihedral angle between two l.s. planes)
 are estimated using the full covariance matrix.  The cell esds are taken
 into account individually in the estimation of esds in distances, angles
 and torsion angles; correlations between esds in cell parameters are only
 used when they are defined by crystal symmetry.  An approximate (isotropic)
 treatment of cell esds is used for estimating esds involving l.s. planes.
;
loop_
  _geom_bond_atom_site_label_1
  _geom_bond_atom_site_label_2
  _geom_bond_distance
  _geom_bond_site_symmetry_2
  _geom_bond_publ_flag
 Si1 O1 1.6131(18) . ?
 Si1 O1 1.6242(18) 12_756 ?
 Si1 C3 1.824(4) . ?
 Si1 C4 1.837(3) . ?
 O1 Si1 1.6242(18) 15_665 ?
 C3 H3A 0.9700 . ?
 C3 H3B 0.9700 . ?
 C3 H3C 0.9700 . ?
 C4 H4A 0.9700 . ?
 C4 H4B 0.9700 . ?
 C4 H4C 0.9700 . ?

loop_
  _geom_angle_atom_site_label_1
  _geom_angle_atom_site_label_2
  _geom_angle_atom_site_label_3
  _geom_angle
  _geom_angle_site_symmetry_1
  _geom_angle_site_symmetry_3
  _geom_angle_publ_flag
 O1 Si1 O1 109.99(13) . 12_756 ?
 O1 Si1 C3 108.16(17) . . ?
 O1 Si1 C3 111.02(16) 12_756 . ?
 O1 Si1 C4 109.96(16) . . ?
 O1 Si1 C4 107.63(14) 12_756 . ?
 C3 Si1 C4 110.1(2) . . ?
 Si1 O1 Si1 149.10(14) . 15_665 ?
 Si1 C3 H3A 109.5 . . ?
 Si1 C3 H3B 109.5 . . ?
 Si1 C3 H3C 109.5 . . ?
 H3A C3 H3B 109.5 . . ?
 H3A C3 H3C 109.5 . . ?
 H3B C3 H3C 109.5 . . ?
 Si1 C4 H4A 109.5 . . ?
 Si1 C4 H4B 109.5 . . ?
 Si1 C4 H4C 109.5 . . ?
 H4A C4 H4B 109.5 . . ?
 H4A C4 H4C 109.5 . . ?
 H4B C4 H4C 109.5 . . ?

loop_
  _geom_torsion_atom_site_label_1
  _geom_torsion_atom_site_label_2
  _geom_torsion_atom_site_label_3
  _geom_torsion_atom_site_label_4
  _geom_torsion
  _geom_torsion_site_symmetry_1
  _geom_torsion_site_symmetry_2
  _geom_torsion_site_symmetry_3
  _geom_torsion_site_symmetry_4
  _geom_torsion_publ_flag
 O1 Si1 O1 Si1 -27.6(3) 12_756 . . 15_665 ?
 C3 Si1 O1 Si1 -149.0(3) . . . 15_665 ?
 C4 Si1 O1 Si1 90.7(3) . . . 15_665 ?

_shelx_res_file
;
TITL 240_a.res in I4(1)/a
REM Old TITL 250_a.res in I4(1)/a
REM SHELXT solution in I4(1)/a
REM R1 0.176, Rweak 0.009, Alpha 0.021, Orientation as input
REM Formula found by SHELXT: C2 O Si
CELL 0.71073 16.085 16.085 6.8911 90 90 90
ZERR 4 0.0016 0.0016 0.0009 0 0 0
LATT 2
SYMM 0.5-X,-Y,0.5+Z
SYMM 0.75-Y,0.25+X,0.25+Z
SYMM 0.75+Y,0.75-X,0.75+Z
SFAC C H O Si
UNIT 32 96 16 16

L.S. 4
PLAN  4
SIZE 0.3 0.3 0.5
TEMP -33.15
CONF
BOND $H
list 4
fmap 2
acta
MORE -1
REM <olex2.extras>
REM <HklSrc "%.\\240.hkl">
REM </olex2.extras>

WGHT    0.075400    0.974300
FVAR       0.50984
SI1   4    0.931962    0.366670    0.085426    11.00000    0.04399    0.04799 =
         0.07272    0.01402    0.00091    0.00178
O1    3    1.031867    0.358491    0.078239    11.00000    0.04521    0.06067 =
         0.10366    0.01955   -0.01030   -0.00106
C3    1    0.894905    0.386882   -0.160229    11.00000    0.09031    0.15648 =
         0.09770    0.04321   -0.03359   -0.02772
AFIX 137
H3A   2    0.920800    0.437074   -0.209567    11.00000   -1.50000
H3B   2    0.835022    0.393957   -0.158394    11.00000   -1.50000
H3C   2    0.909184    0.340363   -0.243372    11.00000   -1.50000
AFIX   0
C4    1    0.901979    0.452389    0.247145    11.00000    0.12213    0.05423 =
         0.13423   -0.00106    0.04179    0.00181
AFIX 137
H4A   2    0.917958    0.439023    0.379241    11.00000   -1.50000
H4B   2    0.842273    0.460440    0.240936    11.00000   -1.50000
H4C   2    0.929875    0.502959    0.206639    11.00000   -1.50000
AFIX   0
HKLF 4

REM  240_a.res in I4(1)/a
REM R1 =  0.0545 for     816 Fo > 4sig(Fo)  and  0.0971 for all    1376 data
REM     39 parameters refined using      0 restraints

END

WGHT      0.0754      0.9743

REM Highest difference peak  0.394,  deepest hole -0.279,  1-sigma level  0.051
Q1    1   0.9331  0.3426 -0.0308  11.00000  0.05    0.39
Q2    1   1.0206  0.3622  0.2065  11.00000  0.05    0.33
Q3    1   0.8796  0.4483  0.0792  11.00000  0.05    0.25
Q4    1   0.9405  0.3300 -0.2114  11.00000  0.05    0.24
;
_shelx_res_checksum                23334
_shelx_hkl_file
;
   0  -1   1 9084.59  272.07
   0  -1   1 8335.07  285.27
   0   1  -1 8663.33  264.47
   0  -2   2   58.59    2.70
   0  -3   3  481.75   20.60
   0  -3   3  504.45   16.10
   0   3  -3  495.05   16.30
   0  -4   4  310.77   17.10
   0   4  -4  338.57   12.00
   0  -5   5    7.80    6.00
   0  -5   5   14.40    2.50
   0   5  -5   12.60    2.60
   0  -6   6   13.20    7.80
   0   6  -6    7.30    2.50
   0  -7   7   34.50   11.00
   0  -8   8    6.10    8.50
   0  -9   9    0.10    9.60
   1  -9   8   13.30   10.90
   1  -8   7   50.79   12.20
  -1   7  -6    3.10    2.60
   1  -7   6   -1.80    6.60
  -1   6  -5   41.70    4.20
   1  -6   5   43.70    4.40
   1  -6   5   43.30    9.20
  -1   5  -4  198.18    8.60
   1  -5   4  205.78    8.50
   1  -5   4  185.28   13.60
  -1   4  -3  145.29    6.10
   1  -4   3  132.79    6.00
   1  -4   3  139.29    9.70
   1  -4   3  132.09    5.50
  -1   3  -2   67.39    3.40
   1  -3   2   61.69    3.40
   1  -3   2   68.89    5.70
   1  -3   2   66.29    3.10
  -1   2  -1  488.25   15.90
   1  -2   1  495.55   17.40
   1  -2   1  510.65   15.90
   1  -2   1  498.55   15.80
  -1   1   0    0.10    0.20
  -1   1   0    1.40    0.30
   1  -1   0    0.00    0.20
   1  -1   0    0.10    0.20
  -1   0   1 8633.14  298.77
  -1   0   1 8758.92  266.77
   1   0  -1 8495.65  263.37
  -1  -1   2 3349.96  103.69
  -1  -1   2 3370.96  102.89
   1   1  -2 3301.27  103.79
  -1  -2   3  597.74   23.80
  -1  -2   3  630.44   20.10
   1   2  -3  640.94   20.10
  -1  -3   4   22.10    5.70
  -1  -3   4   22.60    2.30
   1   3  -4   22.10    2.50
  -1  -4   5   62.49    9.50
   1   4  -5   73.49    4.80
  -1  -5   6    0.00    5.40
   1   5  -6    4.40    2.20
  -1  -6   7   -0.90    7.60
  -1  -7   8    4.80    9.60
  -1  -8   9   -8.20    9.50
   2 -10   8    0.80    8.30
   2  -9   7    7.70    9.00
  -2   8  -6  111.99    7.70
   2  -8   6  114.29   15.00
  -2   7  -5    5.80    2.60
   2  -7   5    5.10    6.60
  -2   6  -4   95.89    6.00
   2  -6   4  101.19   11.70
   2  -6   4   98.79    5.90
  -2   5  -3  279.87   10.90
   2  -5   3  276.67   10.80
   2  -5   3  295.07   10.40
   2  -5   3  268.17   14.90
  -2   4  -2  575.24   19.50
   2  -4   2  579.74   19.10
   2  -4   2  590.94   22.50
   2  -4   2  592.04   19.50
  -2   3  -1 1318.37   42.70
   2  -3   1 1377.96   42.70
   2  -3   1 1380.86   42.80
   2  -3   1 1425.36   44.60
  -2   2   0   10.60    1.30
  -2   2   0    9.10    0.90
   2  -2   0   10.40    1.30
  -2   1   1 1027.00   31.70
  -2   1   1 1023.10   31.70
   2  -1  -1  995.30   31.60
  -2   0   2   38.10    2.40
  -2   0   2   39.10    3.80
   2   0  -2   38.00    2.40
  -2  -1   3  347.27   11.80
  -2  -1   3  348.57   15.00
   2   1  -3  332.77   11.60
  -2  -2   4    6.60    1.60
  -2  -2   4    9.40    4.30
   2   2  -4    6.50    1.70
  -2  -3   5   49.50    8.30
   2   3  -5   52.49    4.00
  -2  -4   6   -0.50    5.50
   2   4  -6    0.30    1.80
  -2  -5   7   -4.90    6.20
  -2  -6   8    4.50    8.40
  -2  -7   9   -4.50    8.70
   3 -11   8    1.40    9.30
   3 -10   7    6.70    9.90
   3  -9   6   -9.60    6.60
   3  -8   5   62.89   11.40
   3  -7   4   36.70    4.30
   3  -7   4   34.70    8.00
   3  -6   3  165.08   11.70
   3  -6   3  171.68    8.10
   3  -6   3  178.18    7.50
   3  -5   2  119.39    5.60
  -3   4  -1  742.53   24.50
   3  -4   1  728.23   24.30
   3  -4   1  727.53   24.40
   3  -4   1  790.62   26.50
  -3   3   0    0.90    1.10
   3  -3   0   -0.50    1.10
  -3   2   1 2927.81   86.29
  -3   2   1 2764.12   85.79
   3  -2  -1 2698.03   85.79
  -3   1   2   22.30    2.90
  -3   1   2   21.80    2.30
   3  -1  -2   20.10    2.20
  -3   0   3  478.25   16.30
  -3   0   3  448.36   18.50
   3   0  -3  500.15   16.20
  -3  -1   4 1475.45   46.00
  -3  -1   4 1448.56   50.69
   3   1  -4 1450.75   45.70
  -3  -2   5  223.58   15.00
   3   2  -5  232.58    9.30
  -3  -3   6   -2.80    4.80
   3   3  -6    2.30    1.80
  -3  -4   7    0.80    6.40
  -3  -5   8   -5.90    6.70
  -3  -6   9    9.80   10.20
   4 -12   8   13.00   11.20
   4 -11   7   -3.00    7.70
   4 -10   6   59.09   12.80
   4  -9   5   32.90    9.50
   4  -8   4    3.30    6.60
   4  -8   4    3.50    2.80
   4  -7   3  185.58    9.20
   4  -7   3  194.18   13.60
   4  -6   2   28.50    3.10
   4  -6   2   27.90    3.40
   4  -6   2   21.20    4.70
  -4   5  -1    2.20    1.40
  -4   5  -1    2.70    1.90
   4  -5   1    1.50    2.20
   4  -5   1    0.90    1.40
  -4   4   0   46.10    3.70
   4  -4   0   44.70    3.60
  -4   3   1  372.56   13.60
  -4   3   1  384.26   12.60
   4  -3  -1  367.86   13.60
  -4   2   2    0.00    1.50
  -4   2   2    0.40    1.20
   4  -2  -2   -0.70    1.10
  -4   1   3  131.39    6.40
  -4   1   3  156.68    8.50
   4  -1  -3  125.79    6.20
  -4   0   4  262.97   14.00
   4   0  -4  262.97   10.30
  -4  -1   5  239.98   15.20
   4   1  -5  240.28    9.70
  -4  -2   6  226.48   16.60
   4   2  -6  212.18    9.30
  -4  -3   7   58.19   11.30
  -4  -4   8   -1.10    6.30
  -4  -5   9    0.00    7.70
   5 -12   7   -6.00    7.70
   5 -11   6   -2.10    8.40
   5 -10   5   73.79   12.20
   5  -9   4  333.67   20.20
   5  -8   3  226.58   15.30
   5  -8   3  241.08   11.20
  -5   7  -2  419.46   16.50
   5  -7   2  439.56   16.30
   5  -7   2  462.15   16.90
   5  -7   2  431.46   19.80
  -5   6  -1    9.50    2.10
   5  -6   1   15.20    2.60
  -5   5   0   -2.20    1.20
  -5   5   0   -0.40    1.00
   5  -5   0    2.30    1.50
  -5   4   1  120.49    5.00
  -5   4   1  116.89    6.30
   5  -4  -1  122.49    6.30
  -5   3   2 1157.98   38.50
  -5   3   2 1203.78   38.50
   5  -3  -2 1199.58   38.60
  -5   2   3  940.41   31.80
  -5   2   3  990.00   33.40
   5  -2  -3  953.70   31.70
  -5   1   4  153.28   10.40
   5  -1  -4  150.18    7.30
  -5   0   5    9.40    4.90
   5   0  -5    7.70    2.20
  -5  -1   6    3.60    5.30
   5   1  -6    3.70    1.90
  -5  -2   7   -2.80    6.40
  -5  -3   8    8.30    7.80
  -5  -4   9    0.50    8.40
   6 -13   7    7.20   10.30
   6 -12   6    5.60    8.00
   6 -11   5   60.29   12.20
   6 -10   4   20.70    7.50
   6  -9   3  137.09    9.40
   6  -9   3  118.69   11.90
  -6   8  -2  330.87   15.40
  -6   8  -2  350.06   14.90
   6  -8   2  426.26   15.70
  -6   7  -1  332.07   13.10
  -6   7  -1  317.77   13.40
   6  -7   1  313.37   13.30
  -6   6   0   24.50    3.20
  -6   6   0   32.90    3.00
   6  -6   0   24.70    3.30
  -6   5   1   45.80    3.00
  -6   5   1   49.60    4.50
   6  -5  -1   54.39    4.70
  -6   4   2  613.34   21.40
  -6   4   2  604.94   22.00
   6  -4  -2  633.04   22.00
  -6   3   3    3.50    2.10
  -6   3   3    1.10    2.50
   6  -3  -3    0.20    1.70
  -6   2   4  223.68   12.50
   6  -2  -4  232.68   10.20
  -6   1   5   23.50    5.80
   6  -1  -5   22.70    3.40
  -6   0   6    0.90    5.60
   6   0  -6    8.10    2.30
  -6  -1   7    3.40    6.70
  -6  -2   8    3.40    8.00
  -6  -3   9    3.30    7.80
   7 -14   7    0.60    9.80
   7 -13   6   -9.20    7.30
   7 -12   5   -0.80    7.30
   7 -11   4   47.30   10.00
  -7  10  -3  268.47   14.40
  -7   9  -2   78.39    7.00
  -7   9  -2   77.59    7.80
   7  -9   2   82.39    7.20
  -7   8  -1  461.65   18.70
  -7   8  -1  470.45   17.90
   7  -8   1  481.85   18.70
  -7   7   0    0.20    2.10
  -7   7   0   -0.10    1.70
   7  -7   0    4.10    2.10
  -7   6   1    3.00    1.40
  -7   6   1    0.70    2.20
   7  -6  -1   -0.80    1.80
  -7   5   2   94.39    5.60
  -7   5   2   88.99    6.40
   7  -5  -2   89.29    6.40
  -7   4   3  294.87   13.40
   7  -4  -3  293.77   12.80
  -7   3   4  457.15   21.00
   7  -3  -4  536.85   19.20
  -7   2   5    3.00    4.10
   7  -2  -5    1.50    2.20
  -7   1   6   -2.90    4.70
   7  -1  -6    1.50    2.00
  -7   0   7   42.20    9.90
  -7  -1   8   20.10    9.90
  -7  -2   9   -1.40    8.70
  -8  14  -6   17.40    7.70
  -8  13  -5    0.40    5.20
  -8  12  -4   72.29    9.20
  -8  11  -3   46.30    6.80
  -8  10  -2   36.00    5.80
  -8   9  -1  183.48   10.50
  -8   9  -1  164.38    9.50
   8  -9   1  188.38   10.60
  -8   8   0 1188.88   41.00
  -8   8   0 1184.38   38.80
   8  -8   0 1188.98   40.80
  -8   7   1  548.05   19.00
  -8   7   1  566.34   21.50
   8  -7  -1  535.45   21.20
  -8   6   2   20.50    4.30
  -8   6   2   24.00    3.50
   8  -6  -2   28.50    4.60
  -8   5   3   71.79    6.60
   8  -5  -3   64.99    6.20
  -8   4   4   36.30    6.00
   8  -4  -4   42.90    5.30
  -8   3   5    3.00    4.20
   8  -3  -5    0.40    2.20
  -8   2   6   -3.10    4.80
   8  -2  -6   -1.00    2.00
  -8   1   7    9.60    7.10
  -8   0   8   -1.10    6.80
  -8  -1   9    0.50    8.90
  -9  15  -6   -2.70    5.10
  -9  14  -5    6.60    6.20
  -9  13  -4    8.20    5.80
  -9  12  -3    2.40    4.30
  -9  11  -2   28.00    5.40
  -9  10  -1   11.10    4.00
  -9  10  -1    9.10    3.60
   9 -10   1   14.10    4.10
  -9   9   0    6.20    2.80
  -9   9   0    0.10    3.20
   9  -9   0    1.80    3.10
  -9   8   1  564.04   22.90
  -9   8   1  581.74   20.20
   9  -8  -1  574.84   22.80
  -9   7   2  906.11   31.40
   9  -7  -2  936.61   33.20
  -9   6   3   60.69    6.60
   9  -6  -3   72.69    6.70
  -9   5   4   18.70    5.10
   9  -5  -4   19.00    4.10
  -9   4   5   59.29    8.60
   9  -4  -5   56.69    6.20
  -9   3   6    3.10    4.80
   9  -3  -6    3.30    2.70
  -9   2   7    4.80    6.30
  -9   1   8   17.80    8.70
  -9   0   9   -2.80    7.90
 -10  15  -5    4.40    6.20
 -10  14  -4   18.70    6.50
 -10  13  -3   24.80    6.20
 -10  12  -2  142.39    9.60
 -10  11  -1   12.30    3.70
 -10  10   0   52.09    5.00
 -10  10   0   30.90    5.10
  10 -10   0   48.40    6.50
 -10   9   1  243.78   13.50
 -10   9   1  259.47   10.80
  10  -9  -1  239.78   13.00
 -10   8   2    2.30    2.40
  10  -8  -2   -1.80    3.00
 -10   7   3  189.68   11.20
  10  -7  -3  237.08   12.00
 -10   6   4    5.40    3.70
  10  -6  -4    7.90    3.60
 -10   5   5    1.80    4.10
  10  -5  -5    6.20    3.30
 -10   4   6    9.40    5.60
 -10   3   7    6.70    6.40
 -10   2   8   12.30    7.90
 -11  16  -5    9.30    6.60
 -11  15  -4    9.70    5.50
 -11  14  -3   26.70    5.90
 -11  13  -2   51.99    7.10
 -11  12  -1    6.70    3.70
 -11  11   0   -0.50    2.30
 -11  10   1    7.50    2.50
  11 -10  -1    2.20    2.90
 -11   9   2    7.30    2.80
  11  -9  -2   10.20    3.80
 -11   8   3   -2.10    2.70
  11  -8  -3   -0.50    2.70
 -11   7   4   44.50    6.70
  11  -7  -4   67.99    7.00
 -11   6   5   47.80    8.10
  11  -6  -5   55.89    6.80
 -11   5   6    6.60    5.20
 -11   4   7    2.00    5.10
 -11   3   8    5.40   10.10
 -12  16  -4   -0.30    5.40
 -12  15  -3   15.30    6.00
 -12  14  -2    2.20    4.30
 -12  13  -1   59.29    6.90
 -12  12   0   28.60    4.50
 -12  11   1    8.30    2.80
 -12  10   2   23.80    4.40
  12 -10  -2   21.90    5.50
 -12   9   3   19.00    4.80
  12  -9  -3   17.90    4.70
 -12   8   4   -0.10    3.40
  12  -8  -4   11.20    4.10
 -12   7   5   39.80    7.30
 -12   6   6   58.39    9.60
 -13  16  -3    1.00    4.80
 -13  15  -2   31.30    6.20
 -13  14  -1   39.30    6.00
 -13  13   0   -0.90    2.80
 -13  12   1    2.30    2.60
 -13  11   2   24.50    4.60
 -13  10   3   14.10    4.80
  13 -10  -3   22.80    5.30
 -13   9   4   -2.90    3.10
  13  -9  -4   -0.40    3.30
 -14  16  -2    2.90    4.40
 -14  15  -1    8.30    4.40
 -14  14   0   31.80    5.10
 -14  13   1   -0.50    2.80
 -16  14   0   14.20    4.50
 -16  15  -1    7.10    4.40
 -15   9   4    4.90    7.20
 -15  10   3   37.50    7.00
 -15  11   2   17.80    4.90
 -15  12   1   -2.30    3.00
 -15  13   0   -0.90    3.10
 -15  14  -1   -2.00    3.30
 -15  15  -2    3.50    4.50
 -15  16  -3   -1.40    4.70
 -14   6   6    1.30    5.40
 -14   7   5   -4.40    4.00
  14  -8  -4   15.00    4.80
 -14   8   4    7.50    5.20
 -14   9   3   22.80    5.70
 -14  10   2   -0.10    3.30
 -14  11   1   24.60    4.50
 -14  12   0    1.40    3.20
 -14  13  -1   -3.50    3.30
 -14  14  -2   -0.50    4.10
 -14  15  -3   -3.50    4.60
 -13   4   7    2.40    6.00
 -13   5   6    0.90    4.90
 -13   6   5   40.80    8.00
  13  -7  -4   65.39    7.60
 -13   7   4   49.00    8.10
  13  -8  -3   34.80    5.60
 -13   8   3   40.50    6.40
  13  -9  -2  151.18   10.60
 -13   9   2  125.89    8.80
 -13  10   1   84.69    6.50
 -13  11   0    0.00    2.30
 -13  12  -1    3.80    3.60
 -13  13  -2   21.30    5.70
 -13  14  -3   20.90    6.20
 -13  15  -4    1.00    5.30
 -12   2   8   -1.80    6.90
 -12   3   7    0.10    6.00
 -12   4   6   -1.30    4.40
  12  -5  -5    9.00    3.70
 -12   5   5   25.40    6.70
  12  -6  -4    0.40    3.00
 -12   6   4   -5.10    3.20
  12  -7  -3   33.00    5.60
 -12   7   3   29.50    5.60
  12  -8  -2   23.50    5.10
 -12   8   2   19.80    4.10
  12  -9  -1   14.60    4.30
 -12   9   1   16.70    3.40
 -12  10   0   10.20    3.20
 -12  11  -1    8.20    3.50
 -12  12  -2   63.89    7.70
 -12  13  -3    6.40    4.90
 -12  14  -4   33.20    7.00
 -12  15  -5    0.20    5.70
 -11   1   8   -2.70    7.30
 -11   2   7    9.60    7.30
 -11   3   6    4.00    5.50
  11  -4  -5    4.80    3.10
 -11   4   5    2.20    4.70
  11  -5  -4   87.19    7.70
 -11   5   4   75.39    9.10
  11  -6  -3   35.20    5.30
 -11   6   3   28.60    5.20
  11  -7  -2  244.08   12.60
 -11   7   2  225.08   11.20
  11  -8  -1  175.68   11.00
 -11   8   1  200.28    9.30
 -11   8   1  187.28   11.60
  11  -9   0    2.10    3.00
 -11   9   0    2.70    2.40
 -11   9   0    3.00    5.50
 -11  10  -1    6.00    2.90
 -11  11  -2    0.10    3.80
 -11  12  -3   89.79    9.30
 -11  13  -4   17.30    5.80
 -11  14  -5   15.00    6.30
 -10   0   8    3.40    7.60
 -10   1   7    6.20    7.20
 -10   2   6    0.20    5.20
  10  -3  -5   26.20    4.50
 -10   3   5   27.20    6.70
  10  -4  -4  130.89    8.80
 -10   4   4  117.09   10.00
  10  -5  -3    1.80    2.60
 -10   5   3   -3.70    3.10
  10  -6  -2   83.59    7.20
 -10   6   2   84.89    6.60
  10  -7  -1  546.55   22.40
 -10   7   1  581.14   20.40
 -10   7   1  573.24   22.90
  10  -8   0 1348.86   46.40
 -10   8   0 1350.06   46.70
 -10   8   0 1371.96   44.50
  10  -9   1  257.07   18.90
 -10   9  -1  257.47   14.70
 -10   9  -1  269.27   12.50
 -10  10  -2  107.59    8.10
 -10  11  -3   94.39    8.60
 -10  12  -4    2.10    5.20
 -10  13  -5   14.70    6.10
 -10  14  -6   -6.00    5.90
  -9  -2   9    9.20    9.50
  -9  -1   8   16.40    9.40
  -9   0   7   43.20   10.40
   9  -1  -6    0.40    2.30
  -9   1   6    0.90    5.80
   9  -2  -5    1.60    2.40
  -9   2   5    2.30    4.20
   9  -3  -4   24.80    4.40
  -9   3   4   16.30    4.80
   9  -4  -3   36.90    5.10
  -9   4   3   29.90    5.00
   9  -5  -2   82.89    6.80
  -9   5   2   97.59    6.30
  -9   5   2   83.99    7.20
   9  -6  -1  139.49    8.50
  -9   6   1  121.39    8.40
  -9   6   1  121.39    6.50
   9  -7   0   -0.30    2.60
  -9   7   0    2.70    2.20
  -9   7   0    2.00    3.00
   9  -8   1  578.24   22.60
  -9   8  -1  582.34   21.70
  -9   8  -1  571.34   22.80
  -9   9  -2  363.76   16.30
  -9  10  -3   42.00    6.60
  -9  11  -4   59.69    8.30
  -9  12  -5   39.10    8.30
  -9  13  -6    3.80    6.20
  -8  -3   9   -3.10    8.10
  -8  -2   8    5.00    7.40
  -8  -1   7   42.60   10.90
   8   0  -6  180.18    9.30
  -8   0   6  191.78   15.60
   8  -1  -5   52.69    5.20
  -8   1   5   49.40    8.60
   8  -2  -4  184.08    9.50
  -8   2   4  170.98   11.40
   8  -3  -3  831.12   28.70
  -8   3   3  798.72   29.80
   8  -4  -2  438.36   17.10
  -8   4   2  426.06   16.50
  -8   4   2  438.36   17.30
   8  -5  -1    3.00    2.10
  -8   5   1   -0.50    2.00
  -8   5   1    1.20    1.40
   8  -6   0  271.27   11.90
  -8   6   0  255.07   11.90
  -8   6   0  246.88   10.30
   8  -7   1  561.14   21.30
  -8   7  -1  547.25   20.50
  -8   7  -1  567.74   21.50
   8  -8   2   28.20    4.50
  -8   8  -2   37.10    5.10
  -8   8  -2   28.10    4.90
  -8   9  -3  136.49    9.70
  -8  10  -4   -1.60    4.40
   8 -11   5   -2.60    6.80
  -8  11  -5    2.80    5.00
   8 -12   6    1.50    8.50
  -8  13  -7   -3.50    6.40
  -7  -4   9   -4.20    7.30
  -7  -3   8   10.90    8.50
  -7  -2   7   19.50    8.70
   7   1  -6    4.00    2.10
  -7  -1   6    6.30    5.60
   7   0  -5   95.99    6.20
  -7   0   5   92.79    9.90
   7  -1  -4   49.60    4.90
  -7   1   4   49.99    7.00
   7  -2  -3    6.40    2.40
  -7   2   3    8.30    2.60
  -7   2   3    2.80    2.90
   7  -3  -2   66.39    5.00
  -7   3   2   68.59    5.00
  -7   3   2   69.79    5.30
   7  -4  -1  927.01   30.80
  -7   4   1  875.61   30.60
  -7   4   1  897.91   29.20
   7  -5   0    1.00    1.80
  -7   5   0    0.90    1.90
   7  -6   1    2.30    1.90
  -7   6  -1    3.50    2.00
  -7   6  -1    0.20    1.80
   7  -7   2  273.07   12.30
  -7   7  -2  283.37   13.00
  -7   7  -2  278.87   12.40
   7  -8   3   19.30    3.90
  -7   8  -3   22.20    5.80
   7  -9   4  258.37   18.10
   7 -10   5   50.39   10.70
   7 -11   6   -6.90    7.30
   7 -12   7   -1.10    9.70
  -6  -5   9   -4.00    8.80
  -6  -4   8    2.20    8.20
  -6  -3   7  -11.50    5.70
   6   2  -6    7.00    2.30
  -6  -2   6    7.60    6.10
   6   1  -5   45.20    4.20
  -6  -1   5   39.10    7.80
   6   0  -4   20.50    3.00
  -6   0   4   22.70    5.50
   6  -1  -3  252.37   10.40
  -6   1   3  254.17   10.70
  -6   1   3  244.48   11.90
   6  -2  -2  115.19    6.00
  -6   2   2  112.89    6.20
  -6   2   2  108.59    6.20
   6  -3  -1  975.60   32.60
  -6   3   1 1020.00   31.50
  -6   3   1  958.90   32.60
   6  -4   0   77.09    5.00
  -6   4   0   77.29    5.10
  -6   4   0   82.39    4.30
   6  -5   1   49.10    4.20
  -6   5  -1   43.70    4.10
  -6   5  -1   46.20    3.90
   6  -6   2   -0.60    1.70
   6  -6   2   -1.70    1.60
  -6   6  -2    0.50    1.70
  -6   6  -2   -0.30    2.20
   6  -7   3   22.80    7.20
   6  -7   3   31.60    4.00
   6  -8   4    5.20    6.80
   6  -9   5   91.19   13.00
   6 -10   6  125.69   17.20
   6 -11   7    7.70    8.80
  -5  -6   9   -1.90    8.90
  -5  -5   8    4.10    8.30
  -5  -4   7    3.90    6.70
   5   3  -6    8.30    2.50
  -5  -3   6   12.10    6.90
   5   2  -5   89.49    5.50
  -5  -2   5   82.89   10.30
   5   1  -4  188.18    8.30
  -5  -1   4  201.18   12.50
   5   0  -3 2081.19   66.19
  -5   0   3 2144.39   68.89
  -5   0   3 2143.69   66.59
   5  -1  -2 1513.45   48.60
  -5   1   2 1540.25   49.40
  -5   1   2 1555.34   48.80
   5  -2  -1  196.88    8.40
  -5   2   1  202.18    8.60
  -5   2   1  212.08    7.80
   5  -3   0   -1.50    1.00
  -5   3   0   -0.30    1.30
  -5   3   0   -1.30    0.90
   5  -4   1  111.09    5.80
  -5   4  -1  115.59    5.90
  -5   4  -1  118.49    6.00
   5  -5   2   24.90    4.90
   5  -5   2   28.80    3.00
   5  -5   2   32.10    3.30
  -5   5  -2   23.80    3.00
   5  -6   3  163.48    7.70
   5  -6   3  112.89   10.70
   5  -8   5   46.00    9.90
   5  -9   6    3.10    7.20
   5 -10   7   13.00    9.20
   5 -11   8    0.60    8.50
  -4  -7   9    3.50    8.60
  -4  -6   8   -7.50    6.40
  -4  -5   7    9.20    7.60
   4   4  -6    3.50    2.10
  -4  -4   6   -3.20    5.80
   4   3  -5  129.09    6.60
  -4  -3   5  133.29   12.80
   4   2  -4   32.10    3.20
  -4  -2   4   29.20    5.70
   4   1  -3  109.29    5.30
  -4  -1   3  111.89    5.50
  -4  -1   3  103.89    7.40
   4   0  -2 1954.50   60.99
  -4   0   2 1984.50   62.39
  -4   0   2 1967.40   61.19
   4  -1  -1 3346.47  131.29
  -4   1   1 3477.85  106.39
  -4   1   1 3449.35  108.49
   4  -2   0 7579.54  241.58
  -4   2   0 7582.54  238.88
  -4   2   0 7986.50  239.08
   4  -3   1  361.36   12.70
  -4   3  -1  348.77   12.70
  -4   3  -1  358.16   12.90
   4  -4   2  126.59    5.60
   4  -4   2  119.69    8.40
   4  -4   2  122.79    5.80
  -4   4  -2  117.99    5.80
   4  -5   3  249.48    9.50
   4  -5   3  243.78   10.00
   4  -5   3  261.37   14.60
   4  -6   4  221.98    9.60
   4  -6   4  227.98   15.40
   4  -7   5   35.90    9.40
   4  -8   6   10.10    7.60
   4  -9   7   18.10    9.50
   4 -10   8   12.50   11.20
  -3  -8   9    9.00   10.90
  -3  -7   8   18.80   10.80
  -3  -6   7   16.80    8.40
   3   5  -6   -0.40    1.80
  -3  -5   6    3.20    6.50
   3   4  -5   34.40    3.60
  -3  -4   5   26.30    7.10
   3   3  -4  490.45   16.80
  -3  -3   4  477.25   21.80
   3   2  -3  553.54   19.50
  -3  -2   3  673.63   23.60
  -3  -2   3  571.34   19.80
   3   1  -2   63.09    3.30
  -3  -1   2   67.69    4.70
  -3  -1   2   58.89    3.40
   3   0  -1    4.10    0.90
  -3   0   1    4.50    1.00
  -3   0   1    4.30    1.20
   3  -1   0   -0.30    0.50
  -3   1   0    0.10    0.50
  -3   1   0   -0.20    0.40
   3  -2   1 2811.32   88.39
   3  -2   1 2985.00   89.69
  -3   2  -1 2813.52   89.39
   3  -3   2  891.51   32.00
   3  -3   2  943.61   28.70
   3  -3   2  891.21   28.80
  -3   3  -2  897.91   28.90
   3  -4   3  175.88   11.60
   3  -4   3  194.28    7.20
   3  -4   3  189.28    7.70
   3  -5   4  102.49    5.40
   3  -5   4   89.49   10.20
   3  -7   6   17.80    8.20
   3  -8   7    6.10    8.30
   3  -9   8   -1.40    8.40
  -2  -9   9   -3.50    9.60
  -2  -8   8    2.10    8.00
  -2  -7   7   -2.40    6.80
   2   6  -6    3.10    2.30
  -2  -6   6    2.40    5.70
   2   5  -5   -0.40    1.90
  -2  -5   5    3.10    5.40
   2   4  -4  302.07   11.30
  -2  -4   4  296.47   16.30
   2   3  -3   28.80    2.60
  -2  -3   3   35.10    5.50
  -2  -3   3   28.70    2.60
   2   2  -2  210.88    7.70
  -2  -2   2  217.68    7.90
  -2  -2   2  220.78   10.00
   2   1  -1  493.15   16.20
  -2  -1   1  524.05   17.10
  -2  -1   1  513.55   16.30
   2   0   0 3942.51  125.39
  -2   0   0 4223.28  126.99
  -2   0   0 4011.60  125.39
   2  -1   1 1006.10   31.10
   2  -1   1  996.80   32.80
  -2   1  -1 1028.90   31.20
   2  -2   2  219.48    7.20
   2  -2   2  205.38    7.30
   2  -2   2  201.38   10.10
  -2   2  -2  213.98    7.50
   2  -3   3  550.44   18.10
   2  -3   3  547.35   17.70
   2  -3   3  572.44   22.90
  -2   3  -3  559.14   18.30
   2  -4   4   43.50    7.40
   2  -4   4   32.70    2.90
  -2   4  -4   27.40    3.00
   2  -5   5   96.39   12.30
  -2   5  -5   80.09    5.40
   2  -6   6    6.90    6.80
  -2   6  -6    6.90    2.60
   2  -7   7   17.40    9.10
   2  -8   8   -1.40    8.70
   2  -9   9   15.60   10.30
  -1  -9   8   14.10   10.90
  -1  -8   7   15.90    9.70
   1   7  -6    1.60    2.40
  -1  -7   6   -0.80    6.00
   1   6  -5   17.70    3.10
  -1  -6   5   12.20    6.50
   1   5  -4  147.79    7.10
  -1  -5   4  149.29   12.20
   1   4  -3  123.79    5.50
  -1  -4   3  119.29    5.30
  -1  -4   3  126.49    9.30
   1   3  -2   34.20    2.40
   1   2  -1  968.40   30.50
  -1  -2   1  989.90   30.50
  -1  -2   1 1002.00   31.80
   1   1   0   -0.10    0.10
   1   1   0    0.50    0.20
  -1  -1   0   -0.10    0.20
  -1  -1   0    0.10    0.10
   1   0   1 8443.16  258.17
  -1   0  -1 8195.78  267.47
   1  -1   2 3272.37  101.29
   1  -1   2 3073.09   98.69
   1  -1   2 3307.57   98.89
  -1   1  -2 3343.07   99.39
   1  -2   3  380.36   13.30
   1  -2   3  425.76   18.40
  -1   2  -3  460.35   13.80
   1  -3   4 1480.35   45.10
   1  -3   4 1467.75   52.19
  -1   3  -4 1456.65   45.70
   1  -4   5  253.37    9.00
   1  -4   5  255.87   17.00
  -1   4  -5  243.28    9.90
   1  -5   6   -2.40    5.80
  -1   5  -6    4.10    2.10
   1  -6   7   11.20    7.90
   1  -7   8   33.10   11.10
   1  -8   9   -7.60    8.70
   0 -10   8    2.80    8.80
   0  -9   7   37.40   11.20
   0   8  -6  166.88    9.30
   0  -8   6  179.78   16.60
   0   7  -5  158.98    8.30
   0   6  -4   19.10    3.30
   0  -6   4   21.60    7.00
   0   5  -3 2094.79   65.69
   0  -5   3 2151.08   65.39
   0  -5   3 2096.29   70.39
   0   4  -2 1935.11   59.19
   0  -4   2 1879.91   62.09
   0  -4   2 1923.71   58.99
   0   2   0 3281.17  118.99
   0   2   0 4143.59  121.19
   0  -2   0 4099.59  120.19
   0  -2   0 3970.30  119.69
   0   1   1 8689.53  270.87
   0  -1  -1 8990.60  270.37
   0  -1  -1 8741.13  267.27
   0   0   2   -1.00    1.90
   0   0  -2   -0.60    0.50
   0  -1   3 2308.17   64.19
   0  -1   3 2038.40   68.59
   0   1  -3 1990.40   64.29
   0  -2   4  120.69   10.60
   0  -2   4  129.49    4.90
   0   2  -4  133.69    5.40
   0  -3   5  217.28    7.90
   0  -3   5  227.18   15.30
   0   3  -5  221.88    8.80
   0  -4   6   76.39   11.50
   0   4  -6   91.99    5.40
   0  -5   7    0.90    7.80
   0  -6   8    2.70    9.10
   0  -7   9   -7.00    7.60
   1 -11   8    6.50   10.20
   1 -10   7    4.00    8.10
  -1   9  -6    0.80    2.90
   1  -9   6    0.20    6.80
  -1   8  -5  289.27   12.80
   1  -8   5  303.67   19.80
  -1   7  -4  538.25   20.00
   1  -7   4  583.64   20.10
   1  -7   4  530.55   25.70
  -1   6  -3    0.90    1.60
   1  -6   3    0.40    1.70
   1  -6   3    1.90    1.40
   1  -6   3    2.50    4.30
  -1   5  -2  799.52   25.30
   1  -5   2  737.13   24.90
  -1   4  -1 1091.09   34.80
   1  -4   1 1126.69   34.80
   1  -4   1 1099.39   34.60
   1  -4   1 1087.99   36.30
  -1   3   0   -0.10    0.50
   1  -3   0    0.10    0.70
   1  -3   0    0.20    0.70
   1  -3   0   -0.10    0.60
  -1   2   1  545.95   17.90
  -1   2   1  526.45   17.60
   1  -2  -1  526.55   17.40
   1  -2  -1  648.84   18.10
  -1   1   2 3341.77  102.29
  -1   1   2 3350.26  102.59
   1  -1  -2 3287.07  103.19
  -1   0   3 1633.14   50.99
  -1   0   3 1676.83   54.69
   1   0  -3 1678.83   50.99
  -1  -1   4  128.09    9.70
  -1  -1   4  129.89    5.20
   1   1  -4  135.09    5.40
  -1  -2   5   37.60    7.50
   1   2  -5   28.50    2.90
  -1  -3   6    4.70    6.50
   1   3  -6    4.00    1.90
  -1  -4   7    6.40    7.60
   1   4  -7    1.10    2.20
  -1  -5   8    2.20    8.60
  -1  -6   9    8.40   10.30
   2 -12   8    3.60   10.00
   2 -11   7   -0.50    8.50
   2 -10   6   55.39   12.30
  -2   9  -5  112.79    8.00
   2  -9   5  103.79   14.10
   2  -8   4  137.79    8.20
  -2   7  -3  280.77   11.80
   2  -7   3  256.37   15.20
   2  -7   3  300.57   11.90
  -2   6  -2   35.70    3.80
   2  -6   2   33.00    5.30
   2  -6   2   40.80    3.70
   2  -6   2   36.80    3.20
   2  -5   1   85.29    5.80
   2  -5   1   91.29    4.60
   2  -5   1   87.29    4.90
  -2   4   0  819.72   26.30
  -2   4   0  796.92   25.70
   2  -4   0  823.52   26.40
  -2   3   1 1500.85   43.70
  -2   3   1 1409.76   44.60
   2  -3  -1 1388.16   44.60
   2  -3  -1 1414.76   44.20
  -2   2   2  214.88    8.10
  -2   2   2  219.18    8.80
   2  -2  -2  223.68    8.20
  -2   1   3  629.44   20.40
  -2   1   3  621.44   23.10
   2  -1  -3  636.04   20.50
  -2   0   4  155.78    6.20
   2   0  -4  142.59    6.10
  -2  -1   5  226.18   14.30
   2   1  -5  200.58    8.10
  -2  -2   6  103.29   12.90
   2   2  -6  106.69    5.50
  -2  -3   7    9.80    7.60
   2   3  -7    6.40    2.30
  -2  -4   8    3.60    8.80
  -2  -5   9    5.20    8.60
   3 -13   8    2.40    9.80
   3 -12   7   -3.70    7.70
   3 -11   6    6.30    8.20
   3 -10   5   -2.80    6.40
   3  -9   4   56.59    9.60
   3  -8   3    7.20    5.20
   3  -8   3    8.00    3.20
   3  -7   2  768.32   26.30
   3  -7   2  747.83   29.10
   3  -7   2  757.12   25.50
   3  -6   1  468.65   17.10
   3  -6   1  473.45   16.70
   3  -6   1  476.15   18.70
  -3   5   0    1.50    1.30
   3  -5   0    2.20    1.60
  -3   4   1  780.92   23.40
  -3   4   1  746.83   24.70
   3  -4  -1  706.03   24.60
  -3   3   2  955.60   30.30
  -3   3   2  912.71   30.10
   3  -3  -2  926.11   30.20
  -3   2   3   59.49    5.20
  -3   2   3   61.29    3.80
   3  -2  -3   49.90    3.60
  -3   1   4   21.30    2.70
  -3   1   4   24.90    4.70
   3  -1  -4   20.60    2.50
  -3   0   5  192.28   13.00
   3   0  -5  188.78    7.90
  -3  -1   6    3.10    5.90
   3   1  -6   -0.10    1.40
  -3  -2   7   52.39   11.00
   3   2  -7   49.70    4.40
  -3  -3   8   52.19   12.20
  -3  -4   9   12.10    9.50
   4 -13   7   10.80   10.50
   4 -12   6   -4.80    7.40
   4 -11   5   11.90    7.50
   4 -10   4    8.20    6.40
   4  -9   3   36.70    5.00
   4  -9   3   30.80    8.10
   4  -8   2   17.30    5.70
   4  -8   2   28.30    4.20
   4  -8   2   24.30    3.50
  -4   7  -1 1089.39   36.00
   4  -7   1 1090.89   38.10
   4  -7   1 1116.29   36.30
   4  -7   1 1061.39   35.80
  -4   6   0  987.60   31.40
  -4   6   0 1009.60   32.60
   4  -6   0  941.11   32.50
  -4   5   1    2.10    1.40
  -4   5   1    1.30    0.80
   4  -5  -1    5.10    1.60
  -4   4   2  127.89    6.00
  -4   4   2  125.79    6.40
   4  -4  -2  125.69    6.50
  -4   3   3  441.26   15.80
  -4   3   3  438.86   16.90
   4  -3  -3  428.56   15.80
  -4   2   4  286.87   14.20
   4  -2  -4  288.57   11.40
   4  -1  -5   56.29    4.40
  -4   0   6   91.79   11.30
   4   0  -6   78.49    4.90
  -4  -1   7   54.29   10.80
   4   1  -7   56.09    7.00
  -4  -2   8   -4.60    7.10
  -4  -3   9   -1.60    8.50
   5 -14   7    1.90    8.70
   5 -13   6    8.10    8.20
   5 -12   5   -1.10    8.00
   5 -11   4   79.89   11.70
   5 -10   3  241.88   16.80
   5  -9   2   74.89    6.60
   5  -9   2   66.69    8.80
  -5   8  -1   24.30    3.80
  -5   8  -1   25.60    3.70
   5  -8   1   21.50    3.50
   5  -8   1   22.60    3.50
  -5   7   0   -1.20    1.60
  -5   7   0    0.10    1.40
   5  -7   0   -1.20    1.70
  -5   6   1   16.10    1.80
  -5   6   1    9.50    2.30
   5  -6  -1   10.50    2.60
  -5   5   2   29.50    2.90
  -5   5   2   27.40    3.40
   5  -5  -2   34.70    4.00
  -5   4   3   39.90    4.10
  -5   4   3   33.30    4.10
   5  -4  -3   34.00    3.80
  -5   3   4  255.77   13.10
   5  -3  -4  251.57   10.80
  -5   2   5    2.40    4.20
   5  -2  -5   -0.40    1.70
  -5   1   6    3.40    5.20
   5  -1  -6    4.50    1.90
  -5   0   7    0.80    6.20
  -5  -1   8    0.80    7.20
  -5  -2   9   -0.90    7.10
   6 -15   7    6.10   10.60
   6 -14   6    5.30    8.40
   6 -13   5   -1.30    6.90
   6 -12   4   31.70    9.30
   6 -11   3    4.30    6.40
  -6  10  -2  234.88   12.40
   6 -10   2  239.38   12.30
  -6   9  -1  113.89    6.90
  -6   9  -1  113.69    7.60
   6  -9   1  104.49    7.50
   6  -9   1  106.69    7.80
  -6   8   0   58.39    4.40
  -6   8   0   58.29    5.40
   6  -8   0   52.59    5.60
  -6   7   1  326.47   13.80
  -6   7   1  334.17   11.60
   6  -7  -1  306.17   13.50
  -6   6   2    1.60    1.80
  -6   6   2    1.70    1.50
   6  -6  -2    1.80    2.20
  -6   5   3  296.27   12.90
   6  -5  -3  292.97   12.70
  -6   4   4    9.30    3.90
   6  -4  -4   21.90    3.40
  -6   3   5  186.78   12.50
   6  -3  -5  181.28    9.10
  -6   2   6    2.40    4.80
   6  -2  -6    4.50    2.10
  -6   1   7    5.10    6.30
  -6   0   8   12.40    8.50
  -6  -1   9    4.30    8.50
   7 -15   6   -3.20    8.10
   7 -14   5   15.10    9.70
   7 -13   4    8.20    8.00
  -7  12  -3  151.88   10.50
  -7  11  -2  372.56   16.50
  -7  10  -1    2.60    3.10
  -7  10  -1   11.20    3.50
  -7   9   0   -4.00    1.90
  -7   9   0   -5.70    2.30
   7  -9   0   -4.10    2.70
  -7   8   1  477.95   16.40
  -7   8   1  493.95   19.10
   7  -8  -1  435.46   18.60
  -7   7   2  270.37   11.10
  -7   7   2  279.57   12.90
   7  -7  -2  285.77   13.00
  -7   6   3  142.29    8.50
   7  -6  -3  172.08    9.30
  -7   5   4  304.67   15.00
   7  -5  -4  294.07   13.40
  -7   4   5  148.89   11.20
   7  -4  -5  144.89    8.70
  -7   3   6    3.40    4.90
   7  -3  -6    1.70    2.10
  -7   2   7    0.20    5.90
  -7   1   8    4.00    7.50
  -7   0   9    8.50    8.60
  -8  16  -6    7.90    6.70
  -8  15  -5    2.60    5.80
  -8  14  -4   14.20    5.70
  -8  13  -3   90.19    8.70
  -8  12  -2    0.90    3.20
  -8  11  -1  299.37   13.00
  -8  11  -1  262.17   14.70
   8 -11   1  261.37   13.90
  -8  10   0    4.00    3.20
  -8  10   0    5.90    2.60
   8 -10   0    8.90    3.70
  -8   9   1  160.58    7.30
  -8   9   1  146.89   10.10
   8  -9  -1  137.39   10.00
  -8   8   2   29.60    3.80
   8  -8  -2   29.40    5.20
  -8   7   3  340.17   15.30
   8  -7  -3  396.76   16.50
  -8   6   4  161.98   10.50
   8  -6  -4  178.18    9.90
  -8   5   5   60.29    7.90
   8  -5  -5   53.89    5.90
  -8   4   6   67.19    9.50
   8  -4  -6   81.29    6.80
  -8   3   7    5.40    6.30
  -8   2   8   -1.20    6.20
  -8   1   9    0.10    7.60
  -9  16  -5   19.20    7.60
  -9  15  -4   23.20    6.80
  -9  14  -3   15.30    5.70
  -9  13  -2   64.09    7.40
  -9  12  -1   90.69    7.30
  -9  11   0    0.50    2.10
  -9  11   0    3.10    3.50
   9 -11   0    2.20    3.00
  -9  10   1   14.10    3.90
  -9  10   1   15.90    2.90
   9 -10  -1   12.00    3.80
  -9   9   2  361.56   14.40
   9  -9  -2  352.16   16.50
  -9   8   3  111.99    7.80
   9  -8  -3  124.19    9.00
  -9   7   4    2.90    3.00
   9  -7  -4   -0.10    2.40
  -9   6   5    3.00    3.80
   9  -6  -5    4.10    2.80
  -9   4   7    3.40    5.90
  -9   3   8    3.40    7.10
 -10  17  -5   20.30    7.70
 -10  16  -4    6.00    5.90
 -10  15  -3   49.99    7.80
 -10  14  -2    8.50    4.50
 -10  13  -1   11.50    3.80
 -10  12   0   16.60    3.50
 -10  11   1    8.80    2.50
  10 -11  -1    6.30    3.50
 -10  10   2   81.69    6.10
  10 -10  -2   78.19    7.90
 -10   9   3    9.80    3.30
  10  -9  -3    9.50    3.90
 -10   8   4   33.40    5.60
  10  -8  -4   56.79    6.90
 -10   7   5   10.10    4.40
  10  -7  -5    6.40    3.30
 -10   6   6   24.00    6.70
 -11  17  -4   12.60    6.40
 -11  16  -3    1.10    4.70
 -11  15  -2   77.19    8.40
 -11  14  -1   47.00    6.10
 -11  13   0    1.00    2.60
 -11  12   1   10.40    2.90
 -11  11   2    0.90    2.40
  11 -11  -2    2.40    3.50
 -11  10   3   40.20    5.80
  11 -10  -3   67.59    7.90
 -11   9   4    5.60    3.60
  11  -9  -4   28.60    5.20
 -12  17  -3    3.20    5.00
 -12  16  -2   -1.90    4.00
 -12  15  -1   34.20    5.50
 -12  14   0  113.69    7.80
 -12  13   1   63.89    5.90
  12 -11  -3   60.79    7.70
  12 -10  -4   22.70    5.40
 -17  10   3   -3.70    4.70
 -17  11   2   14.40    5.50
 -17  12   1   12.50    4.60
 -17  13   0   -1.60    3.50
 -17  14  -1   10.10    4.80
 -16   7   5   10.10    6.70
 -16   8   4   -0.70    5.10
 -16   9   3   -2.30    4.30
 -16  10   2    6.50    4.40
 -16  11   1    5.50    4.10
 -16  12   0    0.80    3.40
 -16  13  -1   13.20    4.80
 -16  14  -2   -3.40    3.40
 -16  15  -3    5.00    5.20
 -15   4   7   -1.50    6.30
 -15   5   6   -3.00    5.20
 -15   6   5   -4.20    5.00
  15  -7  -4    1.00    3.80
 -15   7   4    4.20    5.30
 -15   8   3    6.10    4.80
 -15   9   2   61.99    7.30
 -15  10   1   34.80    5.40
 -15  11   0   -0.30    3.10
 -15  12  -1    1.10    3.30
 -15  13  -2   -1.90    4.00
 -15  14  -3   -0.10    4.90
 -14   3   7    5.60    7.30
 -14   4   6    1.50    5.70
 -14   5   5   -1.30    5.10
  14  -6  -4    4.70    3.60
 -14   6   4    6.40    5.20
  14  -7  -3   -3.10    3.10
 -14   7   3   -0.90    3.80
 -14   8   2   -0.30    3.20
 -14   9   1  150.28    8.90
 -14  10   0  236.18   11.70
 -14  11  -1   26.10    4.90
 -14  12  -2    5.80    4.50
 -14  13  -3   10.00    5.60
 -14  14  -4   -2.70    4.30
 -13   1   8   14.30    9.40
 -13   2   7   18.30    9.00
 -13   3   6    1.70    5.30
  13  -4  -5    2.90    3.20
 -13   4   5    2.60    5.20
  13  -5  -4   24.80    5.20
 -13   5   4   31.60    6.90
  13  -6  -3   16.30    4.50
 -13   6   3    9.00    4.60
  13  -7  -2   10.80    4.10
 -13   7   2   10.00    3.50
 -13   8   1   33.30    4.40
 -13   9   0    2.30    2.60
 -13  10  -1   89.19    7.10
 -13  11  -2   31.10    6.00
 -13  12  -3    1.90    4.50
 -13  13  -4    2.70    5.20
 -13  14  -5    2.90    5.40
 -12   0   8   10.00    8.30
 -12   1   7    5.20    7.50
 -12   2   6   43.80    9.90
  12  -3  -5   10.30    3.70
 -12   3   5    6.90    5.20
  12  -4  -4   -0.60    2.80
 -12   4   4   -0.60    3.90
  12  -5  -3   59.69    6.70
 -12   5   3   70.09    7.90
  12  -6  -2   65.39    7.10
 -12   6   2   66.89    6.40
  12  -7  -1    8.00    3.80
 -12   7   1    8.30    3.90
 -12   7   1    2.40    2.40
 -12   8   0   12.10    3.00
 -12   9  -1   13.80    3.60
 -12  10  -2   23.40    5.40
 -12  11  -3   62.69    7.90
 -12  12  -4    1.30    4.80
 -12  13  -5   15.90    6.80
 -11  -1   8   -2.60    7.70
 -11   0   7    7.20    6.90
 -11   1   6   -3.70    5.00
  11  -2  -5   15.10    3.80
 -11   2   5   20.70    6.80
  11  -3  -4    4.20    3.00
 -11   3   4   -1.40    4.20
  11  -4  -3   64.49    6.80
 -11   4   3   59.89    6.90
  11  -5  -2    0.90    2.50
 -11   5   2    1.30    3.00
  11  -6  -1  223.78   11.40
 -11   6   1  193.48    9.30
 -11   6   1  188.28   11.50
  11  -7   0   -0.70    2.50
 -11   7   0   -1.50    3.00
 -11   7   0   -2.50    2.00
 -11   8  -1  185.08    9.80
 -11   9  -2   17.20    4.60
 -11  10  -3   79.39    8.50
 -11  11  -4  172.78   12.20
 -11  12  -5   17.30    6.90
 -11  13  -6    2.50    6.30
 -10  -2   8  -13.80    6.00
 -10  -1   7   12.80    8.20
  10   0  -6   85.69   11.10
 -10   0   6   62.19   10.60
  10  -1  -5   19.60    4.00
 -10   1   5   23.10    6.80
  10  -2  -4  161.28    9.50
 -10   2   4  173.68   12.40
  10  -3  -3  724.63   26.10
 -10   3   3  669.43   27.10
  10  -4  -2    3.80    2.30
 -10   4   2    0.30    2.30
 -10   4   2    0.30    2.60
  10  -5  -1  111.09    7.90
 -10   5   1  108.69    8.30
 -10   5   1  122.39    6.70
  10  -6   0  368.96   16.00
 -10   6   0  383.86   16.50
 -10   6   0  365.56   14.50
  10  -7   1  577.84   22.40
 -10   7  -1  576.14   21.60
 -10   7  -1  571.24   22.60
 -10   8  -2    1.80    3.50
 -10   9  -3   14.40    4.90
 -10  10  -4   10.10    4.90
 -10  11  -5   52.39    8.90
 -10  12  -6   35.40    8.10
  -9  -3   8    3.70    8.60
  -9  -2   7   17.00    9.00
   9   1  -6    1.80    2.30
  -9  -1   6    1.60    6.30
   9   0  -5  201.48   10.10
  -9   0   5  193.48   14.20
   9  -1  -4  202.38   10.10
  -9   1   4  198.28   12.80
   9  -2  -3  539.45   20.40
  -9   2   3  537.05   22.10
   9  -3  -2 1844.62   60.59
  -9   3   2 1884.31   60.49
  -9   3   2 1893.31   61.09
   9  -4  -1  575.74   21.80
  -9   4   1  578.64   21.90
  -9   4   1  597.54   20.40
   9  -5   0   -3.80    1.80
  -9   5   0    0.00    1.80
  -9   5   0   -6.00    2.20
   9  -6   1  121.39    7.60
  -9   6  -1  123.49    8.10
  -9   6  -1  123.89    7.40
   9  -7   2  930.01   32.90
  -9   7  -2  962.40   33.50
  -9   7  -2  934.81   33.20
  -9   8  -3  127.29    9.70
  -9   9  -4   -2.40    3.80
  -9  10  -5   10.50    5.80
  -9  11  -6   -7.30    4.60
  -9  12  -7    0.00    5.50
  -8  -4   8   19.40    9.60
  -8  -3   7    0.00    7.40
   8   2  -6  110.79    7.10
  -8  -2   6  118.79   13.70
   8   1  -5  295.67   12.60
  -8  -1   5  291.27   17.50
   8   0  -4   49.60    5.20
  -8   0   4   59.69    8.10
   8  -1  -3    9.70    2.70
  -8   1   3    8.20    3.70
   8  -2  -2   71.09    5.40
  -8   2   2   83.19    6.00
  -8   2   2   76.89    5.50
   8  -3  -1  406.76   16.20
  -8   3   1  453.15   15.30
  -8   3   1  405.26   16.40
   8  -4   0  493.05   18.30
  -8   4   0  473.15   18.40
  -8   4   0  495.95   17.20
   8  -5   1   -1.10    1.60
  -8   5  -1   -0.80    1.90
  -8   5  -1   -0.40    1.70
   8  -6   2   16.80    3.10
  -8   6  -2   27.60    4.40
  -8   6  -2   16.40    3.30
   8  -7   3  401.06   15.90
  -8   7  -3  387.76   16.10
  -8   7  -3  382.06   17.30
  -8   8  -4  101.29    9.40
   8  -9   5    2.30    6.50
   8 -10   6    0.20    7.40
   8 -11   7   -1.30    9.60
  -7  -6   9    3.60    9.60
  -7  -5   8    9.40    9.00
  -7  -4   7   -3.50    7.10
   7   3  -6   22.20    3.50
  -7  -3   6   25.00    8.40
   7   2  -5    3.90    2.10
  -7  -2   5    2.10    5.40
   7   1  -4  562.44   19.90
  -7  -1   4  535.05   23.70
   7   0  -3  153.98    7.70
  -7   0   3  161.48    8.20
  -7   0   3  170.28   10.00
   7  -1  -2  185.58    8.20
  -7   1   2  170.38    8.50
  -7   1   2  161.08    8.20
   7  -2  -1  208.98    9.20
  -7   2   1  213.58    9.50
  -7   2   1  208.88    8.50
   7  -3   0    0.40    1.40
  -7   3   0   -0.70    1.10
  -7   3   0    2.80    1.70
   7  -4   1  828.72   28.60
  -7   4  -1  850.51   28.80
  -7   4  -1  859.91   28.50
   7  -5   2   93.19    5.70
  -7   5  -2   88.89    5.80
  -7   5  -2   90.59    6.30
   7  -6   3  142.89    7.70
  -7   6  -3  141.99    7.90
  -7   6  -3  169.18   10.00
   7  -7   4   17.20    8.00
   7  -8   5   78.99   12.10
   7  -9   6    7.20    8.10
   7 -10   7   -1.50    8.30
   7 -11   8    0.60    9.90
  -6  -7   9    4.90    9.90
  -6  -6   8    2.10    9.10
  -6  -5   7   -3.00    6.70
   6   4  -6    0.60    2.00
  -6  -4   6    3.90    5.70
   6   3  -5    6.10    2.30
  -6  -3   5    8.70    5.20
   6   2  -4   93.29    5.50
  -6  -2   4   77.89    8.80
   6   1  -3    2.00    1.70
  -6  -1   3    6.10    2.90
  -6  -1   3    3.00    1.90
   6   0  -2  196.78    8.50
  -6   0   2  205.08    9.40
  -6   0   2  192.48    8.60
   6  -1  -1 1111.99   36.70
  -6   1   1 1163.88   36.30
  -6   1   1 1133.49   36.90
   6  -2   0  127.09    6.30
  -6   2   0  134.29    5.80
  -6   2   0  138.69    6.60
   6  -3   1 1022.40   32.00
  -6   3  -1  929.71   31.90
  -6   3  -1  976.90   32.00
   6  -4   2  596.74   20.20
  -6   4  -2  559.94   20.30
  -6   4  -2  591.04   21.20
   6  -5   3  293.77   16.20
   6  -5   3  292.57   11.40
  -6   5  -3  277.97   11.50
   6  -6   4   -2.80    5.10
   6  -6   4    1.50    1.80
   6  -7   5   10.40    6.70
   6  -8   6   41.80   11.30
   6  -9   7   19.20    9.70
   6 -10   8   -8.60    7.50
  -5  -7   8    8.00    9.50
  -5  -6   7    3.90    8.40
   5   5  -6    3.10    2.30
  -5  -5   6   -2.70    6.10
   5   4  -5   13.50    2.70
  -5  -4   5   16.10    6.20
   5   3  -4  105.49    5.90
  -5  -3   4  118.89   10.40
   5   2  -3  262.97   10.40
  -5  -2   3  275.77   10.90
  -5  -2   3  271.87   13.20
   5   1  -2  663.63   22.00
  -5  -1   2  655.43   23.50
  -5  -1   2  662.53   22.30
   5   0  -1  305.57   11.30
  -5   0   1  324.47   11.40
  -5   0   1  296.97   11.30
   5  -1   0   -2.90    1.10
  -5   1   0   -1.80    1.10
  -5   1   0   -2.50    1.30
   5  -2   1  194.78    7.90
  -5   2  -1  201.28    8.20
  -5   2  -1  209.58    8.20
   5  -3   2 1117.69   35.30
  -5   3  -2 1106.59   35.60
  -5   3  -2 1098.49   36.50
   5  -4   3   40.90    6.50
   5  -4   3   42.70    3.30
   5  -4   3   32.90    2.90
  -5   4  -3   38.70    3.40
   5  -5   4   65.49    9.80
   5  -5   4   64.49    4.30
   5  -6   5    7.40    6.50
   5  -6   5   10.20    1.70
   5  -7   6    1.50    6.90
   5  -8   7    6.80    8.40
   5  -9   8   18.50   11.20
  -4  -8   8    4.00    9.20
  -4  -7   7   43.10   11.00
   4   6  -6   84.09    6.10
  -4  -6   6   72.69   12.00
   4   5  -5   48.90    4.60
  -4  -5   5   43.70    8.40
   4   4  -4   24.80    3.20
  -4  -4   4   19.10    5.60
   4   3  -3  243.68    8.70
  -4  -3   3  187.98   11.20
  -4  -3   3  193.78    8.60
   4   2  -2  563.94   19.00
  -4  -2   2  575.64   19.30
  -4  -2   2  583.14   21.00
   4   1  -1 1101.99   36.30
  -4  -1   1 1100.09   36.40
  -4  -1   1 1271.67   37.10
   4   0   0 9999.00  302.47
  -4   0   0 9825.02  300.47
  -4   0   0 9455.55  301.67
   4  -1   1 3262.07  103.89
  -4   1  -1 3311.47  103.49
  -4   1  -1 3431.16  102.09
   4  -2   2   -0.50    2.60
   4  -2   2   -0.60    0.80
  -4   2  -2    1.10    1.00
   4  -3   3  442.06   14.30
   4  -3   3  434.66   14.50
   4  -3   3  441.56   19.50
  -4   3  -3  418.36   14.80
   4  -4   4   24.60    6.80
   4  -5   5   16.40    1.80
   4  -5   5   14.80    6.60
   4  -6   6    4.20    6.80
   4  -7   7   10.90    9.60
   4  -8   8    3.60   10.30
  -3  -9   8    3.10    8.10
  -3  -8   7    4.60    8.50
   3   7  -6   -0.90    2.30
  -3  -7   6   -4.50    6.50
   3   6  -5  182.98    8.80
  -3  -6   5  175.18   14.20
   3   5  -4  253.87   10.20
  -3  -5   4  235.28   15.20
   3   4  -3  445.46   15.40
  -3  -4   3  439.46   15.50
  -3  -4   3  437.16   18.90
   3   3  -2  931.81   29.60
  -3  -3   2  920.11   31.80
  -3  -3   2  935.81   29.70
   3   2  -1 1432.36   44.40
  -3  -2   1 1474.75   45.40
  -3  -2   1 1401.56   44.50
   3   1   0    0.10    0.40
  -3  -1   0    0.00    0.40
  -3  -1   0    1.60    0.50
   3   0   1    5.00    0.80
  -3   0  -1    3.70    0.80
  -3   0  -1    4.60    1.20
   3  -1   2   16.10    3.40
   3  -1   2   19.60    1.40
  -3   1  -2   20.10    1.80
   3  -2   3   23.80    4.80
   3  -2   3   30.20    1.70
   3  -2   3   32.70    1.60
   3  -3   4  488.75   22.90
   3  -4   5  124.89   12.50
   3  -5   6   11.10    7.00
   3  -6   7    3.40    8.20
   3  -7   8    3.10    8.60
   3  -8   9   -8.50    9.10
  -2 -10   8   -1.50    9.30
  -2  -9   7   -1.40    7.20
   2   8  -6    1.50    2.50
  -2  -8   6    0.60    6.10
   2   7  -5    2.00    2.40
  -2  -7   5    3.80    5.50
   2   6  -4  224.88    9.80
  -2  -6   4  219.68   15.00
   2   5  -3  973.50   31.50
  -2  -5   3  945.91   35.50
  -2  -5   3  991.50   31.40
   2   4  -2   -0.80    1.00
  -2  -4   2   -2.50    1.90
  -2  -4   2    0.50    1.00
   2   3  -1 2791.52   87.79
  -2  -3   1 2923.11   87.89
  -2  -3   1 2928.11   89.09
   2   2   0   10.30    1.00
  -2  -2   0   10.80    1.00
  -2  -2   0    7.60    0.90
   2   1   1  474.15   15.10
  -2  -1  -1  485.15   15.70
  -2  -1  -1  502.85   15.10
   2   0   2   49.10    4.90
  -2   0  -2   46.70    1.90
   2  -1   3  590.84   23.30
  -2   1  -3  600.64   18.70
   2  -3   5  219.48   15.70
  -2   3  -5  215.88    8.60
   2  -4   6  213.58   17.60
  -2   4  -6  206.38    8.90
   2  -5   7   -3.00    7.20
   2  -6   8   -3.10    7.60
   2  -7   9   -0.80    8.70
  -1 -11   8    4.40    8.90
  -1 -10   7    2.00    7.70
   1   9  -6   -1.90    2.50
  -1  -9   6   -9.70    7.40
   1   8  -5   54.39    5.40
  -1  -8   5   47.50    9.90
   1   7  -4   52.69    5.10
  -1  -7   4   55.69    8.90
   1   6  -3  260.47   10.40
  -1  -6   3  256.57   14.30
  -1  -6   3  259.07   10.00
   1   5  -2 1493.25   46.70
  -1  -5   2 1469.75   46.50
  -1  -5   2 1495.25   49.60
   1   4  -1 3447.16  108.19
  -1  -4   1 3492.55  107.79
  -1  -4   1 3528.55  108.69
   1   3   0   -0.20    0.60
   1   3   0    0.50    0.40
  -1  -3   0    1.10    0.70
  -1  -3   0    0.40    0.60
   1   2   1 1007.00   31.20
  -1  -2  -1  979.80   31.50
  -1  -2  -1  996.70   31.10
  -1  -2  -1 1078.29   31.20
   1   1   2 3243.88  100.29
   1   0   3 1619.64   54.29
  -1   0  -3 1660.13   49.70
   1  -1   4  161.18   11.60
  -1   1  -4  148.69    5.60
   1  -2   5  215.08   14.70
  -1   2  -5  199.78    7.70
   1  -3   6   -7.70    5.60
  -1   3  -6    1.10    1.70
   1  -4   7   58.59   11.50
  -1   4  -7   47.50    4.40
   1  -5   8    7.30    8.10
   1  -6   9    2.70    9.70
   0 -12   8   -4.90    8.00
   0 -11   7    6.10    8.40
   0 -10   6   66.59   12.40
   0   9  -5  198.58   10.40
   0  -9   5  198.08   17.10
   0   8  -4   51.89    5.40
   0  -8   4   46.20    8.70
   0   7  -3  156.88    7.60
   0  -7   3  135.19   10.50
   0  -7   3  149.09    6.90
   0  -6   2  229.68   11.80
   0   5  -1  318.47   11.20
   0  -5   1  296.87   12.30
   0  -5   1  292.17   10.80
   0   4   0 9676.63  294.97
   0   4   0 9739.03  297.47
   0  -4   0 9440.16  295.67
   0  -4   0 9601.64  295.97
   0  -3  -1    2.60    0.90
   0   2   2   35.40    3.30
   0  -2  -2   36.00    2.20
   0   1   3 1860.61   57.29
   0  -1  -3 1651.73   53.39
   0   0   4  641.24   25.80
   0   0  -4  629.44   20.00
   0  -1   5   19.60    6.20
   0   1  -5   24.70    2.20
   0  -2   6   59.39   10.90
   0   2  -6   58.19    3.90
   0  -3   7   28.90    9.10
   0   3  -7   39.90    4.10
   0  -4   8   -1.10    8.30
   0  -5   9    7.30    9.00
   1 -13   8    2.80    8.90
   1 -12   7    7.20    9.80
   1 -11   6   11.90    9.60
  -1  10  -5   26.90    4.30
   1 -10   5   21.10    8.20
  -1   9  -4  779.22   27.30
   1  -9   4  729.63   33.40
  -1   8  -3  324.37   13.60
   1  -8   3  345.67   13.80
   1  -8   3  318.57   17.50
  -1   7  -2    4.90    1.90
   1  -7   2    4.90    1.60
   1  -7   2    6.60    3.20
  -1   6  -1  117.29    5.90
   1  -6   1  107.89    5.40
   1  -6   1  114.59    7.00
   1  -5   0    0.10    1.30
   1  -5   0   -0.30    1.40
   1  -5   0   -1.30    1.20
  -1   4   1 1200.48   34.00
   1  -4  -1 1055.59   33.80
   1  -4  -1 1087.59   35.20
  -1   3   2   61.49    3.30
  -1   3   2   65.39    3.80
   1  -3  -2   60.79    3.40
  -1   2   3  349.27   11.70
  -1   2   3  351.36   14.50
   1  -2  -3  353.56   12.00
  -1   1   4  143.29   10.00
  -1   1   4  137.89    5.20
   1  -1  -4  149.49    5.80
  -1   0   5   18.90    6.00
   1   0  -5   19.00    2.00
  -1  -1   6   -0.30    5.30
   1   1  -6   -1.20    1.10
  -1  -2   7    6.40    6.70
   1   2  -7   11.90    2.50
  -1  -3   8    3.10    7.70
  -1  -4   9    4.00    9.40
   2 -13   7    5.90    9.00
   2 -12   6   -6.20    7.00
  -2  11  -5   34.90    5.30
   2 -11   5   28.70   10.00
  -2  10  -4   81.89    7.40
   2 -10   4   80.29   12.10
  -2   9  -3   79.39    6.90
   2  -9   3   89.99   11.40
   2  -9   3   73.09    6.70
  -2   8  -2  213.58    9.90
   2  -8   2  207.18    9.80
   2  -8   2  211.38   12.70
   2  -8   2  211.08    9.20
   2  -7   1  410.96   14.70
   2  -7   1  407.66   16.10
   2  -7   1  334.77   13.80
   2  -6   0   72.29    4.70
   2  -6   0   80.69    4.70
   2  -6   0   78.29    4.90
  -2   5   1   89.99    3.40
  -2   5   1   89.49    4.80
   2  -5  -1   92.39    5.00
   2  -5  -1   93.59    3.80
  -2   4   2  693.93   22.40
  -2   4   2  587.64   21.80
   2  -4  -2  752.02   22.60
  -2   3   3  571.14   20.80
  -2   3   3  573.04   19.10
   2  -3  -3  576.04   19.30
  -2   2   4   40.00    5.60
  -2   1   5   26.90    6.70
   2  -1  -5   27.60    2.70
  -2   0   6   57.89    9.90
   2   0  -6   55.09    3.70
  -2  -1   7   29.40    9.00
   2   1  -7   30.50    3.20
  -2  -2   8   -4.40    6.20
  -2  -3   9   -7.20    8.20
   3 -14   7    4.40   10.10
   3 -13   6   -0.30    9.10
   3 -12   5   -1.30    6.60
   3 -11   4    7.00    6.20
   3 -10   3  177.18   10.20
   3 -10   3  156.18   14.20
   3  -9   2    6.20    2.80
   3  -9   2   -0.80    3.80
   3  -9   2    0.00    1.90
   3  -8   1  413.46   16.40
   3  -8   1  428.36   15.90
   3  -8   1  426.66   17.90
  -3   7   0   -0.60    1.40
   3  -7   0    0.30    1.70
   3  -7   0    0.30    1.40
  -3   6   1  472.65   16.90
  -3   6   1  472.85   15.10
   3  -6  -1  462.95   17.00
  -3   5   2   73.19    4.70
  -3   5   2   80.19    4.00
   3  -5  -2   66.09    4.60
  -3   4   3  293.97   12.20
  -3   3   4  499.65   20.10
   3  -3  -4  469.75   17.10
  -3   2   5   57.79    8.10
   3  -2  -5   51.69    4.20
  -3   1   6   10.90    5.90
   3  -1  -6    3.20    1.50
  -3   0   7   50.99    9.90
   3   0  -7   43.50    3.90
  -3  -2   9   -2.20    8.10
   4 -15   7   -9.00    7.70
   4 -14   6   39.50   12.40
   4 -13   5   17.30    8.50
   4 -11   3   86.19   11.20
   4 -10   2    0.20    5.00
   4 -10   2    5.60    3.50
   4  -9   1   41.70    4.60
   4  -9   1   58.19    6.30
   4  -9   1   45.20    6.20
  -4   8   0 1021.10   33.20
   4  -8   0 1015.80   34.80
   4  -8   0 1042.00   34.50
  -4   7   1 1057.39   35.30
  -4   7   1 1081.29   33.20
   4  -7  -1 1036.90   35.40
  -4   6   2   24.20    3.20
   4  -6  -2   18.60    2.90
  -4   5   3  255.67   10.80
  -4   5   3  269.97   11.20
   4  -5  -3  251.47   11.00
  -4   4   4   19.80    4.30
   4  -4  -4   17.10    2.90
  -4   3   5   18.70    5.40
  -4   2   6   -3.50    4.40
   4  -2  -6   -0.60    1.50
  -4   1   7    1.40    6.40
   4  -1  -7    0.40    1.80
  -4   0   8    7.60    7.20
  -4  -1   9   -0.50    8.00
   5 -15   6   -4.70    8.70
   5 -14   5   27.40    9.80
   5 -13   4   31.80    9.30
   5 -11   2   45.80    8.10
   5 -11   2   57.89    6.90
  -5  10  -1   27.50    4.50
   5 -10   1   25.10    5.10
   5 -10   1   25.80    4.40
  -5   9   0   -1.60    2.00
  -5   8   1   23.00    3.60
  -5   8   1   25.80    2.40
   5  -8  -1   30.90    4.30
  -5   7   2  466.55   17.30
  -5   7   2  423.76   15.40
   5  -7  -2  442.66   17.20
  -5   6   3   97.49    6.20
   5  -6  -3  105.99    6.80
  -5   5   4   59.09    6.60
  -5   4   5   41.80    6.60
   5  -4  -5   40.40    4.40
  -5   3   6   -1.00    4.60
   5  -3  -6    0.20    1.70
  -5   2   7   -0.60    5.70
  -5   1   8    5.90    7.20
  -5   0   9    0.40    8.40
   6 -16   6    8.40    9.60
   6 -15   5    0.40    8.10
   6 -14   4   12.20    8.60
   6 -13   3   72.29   11.10
  -6  12  -2   25.50    4.90
  -6  11  -1  405.16   16.40
   6 -11   1  400.56   17.60
  -6  10   0  242.78   10.20
  -6  10   0  239.48   11.90
   6 -10   0  224.88   11.70
   6 -10   0  226.58   12.20
  -6   9   1  121.99    5.60
  -6   9   1  114.99    7.90
   6  -9  -1  109.89    8.00
  -6   8   2  333.57   14.40
  -6   8   2  310.87   12.10
   6  -8  -2  333.87   14.40
  -6   7   3   26.30    3.80
   6  -7  -3   22.10    3.90
  -6   6   4    2.60    3.20
   6  -6  -4   -3.20    2.20
  -6   5   5   51.39    7.10
   6  -5  -5   58.19    5.50
  -6   4   6   80.19   10.10
   6  -4  -6   80.29    6.10
  -6   3   7   20.20    7.50
  -6   2   8    4.80    7.50
  -6   1   9   -1.00    7.80
  -7  17  -6    5.10    6.00
  -7  16  -5   16.50    7.00
  -7  15  -4   -0.90    5.40
  -7  14  -3    9.40    4.80
  -7  13  -2  474.55   20.00
  -7  12  -1  383.26   15.90
   7 -12   1  353.46   20.40
  -7  11   0    4.20    2.40
   7 -11   0    1.60    3.10
   7 -11   0    3.60    3.40
  -7  10   1   -2.40    2.80
  -7  10   1    2.10    1.70
   7 -10  -1   -3.00    3.10
  -7   9   2   78.49    5.10
   7  -9  -2   94.19    7.80
  -7   8   3   19.20    3.50
   7  -8  -3   19.60    4.10
   7  -7  -4   75.19    6.90
  -7   6   5    6.60    4.10
   7  -6  -5    8.50    3.10
  -7   5   6    2.90    4.50
   7  -5  -6   -1.30    2.40
  -7   4   7   75.59   11.00
  -7   3   8   22.90    8.80
  -8  17  -5    5.70    6.30
  -8  16  -4   11.60    6.30
  -8  15  -3   10.30    5.20
  -8  14  -2   -0.40    3.50
  -8  13  -1  179.18   10.00
  -8  12   0  667.63   23.40
   8 -12   0  641.14   26.10
  -8  11   1  270.67   10.90
   8 -11  -1  270.07   14.00
  -8  10   2   33.90    4.00
   8 -10  -2   46.70    6.30
  -8   9   3   81.39    6.50
  -8   8   4  129.89    8.90
   8  -8  -4  108.09    8.50
  -8   7   5   14.00    4.60
   8  -7  -5   13.60    3.70
  -8   6   6   18.00    5.90
  -8   5   7   15.50   10.50
  -9  17  -4   25.60    6.70
  -9  16  -3    5.70    5.10
  -9  15  -2    1.60    4.00
  -9  14  -1   11.80    3.80
  -9  13   0   -0.50    2.20
  -9  12   1   93.79    5.60
   9 -12  -1   81.89    8.50
  -9  11   2   27.90    3.70
   9 -11  -2   29.00    5.70
   9 -10  -3   49.80    6.50
  -9   9   4    4.90    3.00
   9  -9  -4    2.50    3.20
   9  -8  -5   24.90    4.80
 -10  18  -4    3.70    6.00
 -10  17  -3    4.30    5.20
 -10  16  -2   29.80    6.00
 -10  15  -1    2.70    3.40
 -10  14   0    2.30    2.70
 -10  13   1    6.90    2.50
  10 -12  -2  166.78   11.60
  10 -11  -3   89.59    8.80
  10 -10  -4    7.70    3.90
 -11  18  -3   24.90    6.60
 -11  17  -2    5.90    5.30
  11 -12  -3   96.09    9.50
  11 -11  -4  167.88   11.90
 -19  11   2   39.80    8.20
 -19  12   1   11.20    5.80
 -19  13   0   -0.90    4.40
 -18   8   4    3.10    6.60
 -18   9   3    0.40    5.30
 -18  10   2   -0.30    4.60
 -18  11   1   24.90    6.00
 -18  12   0   20.80    5.40
 -18  13  -1   -0.40    4.00
 -17   5   6   -5.60    6.20
 -17   6   5    5.00    7.00
 -17   7   4   33.50    8.70
 -17   8   3   17.60    6.60
 -17   9   2    8.10    4.90
 -17  10   1   31.80    6.10
 -17  11   0    3.20    3.90
 -17  12  -1   16.20    5.10
 -17  13  -2    1.90    4.50
 -16   4   6    1.00    7.20
 -16   5   5    2.80    6.70
 -16   6   4    9.70    6.20
 -16   7   3    8.80    5.40
 -16   8   2    4.60    4.20
 -16   9   1   -1.60    3.50
 -16  10   0    7.40    3.90
 -16  11  -1    3.60    3.70
 -16  12  -2   23.80    5.90
 -16  13  -3   -0.20    4.20
 -15   2   7   -3.80    6.70
 -15   3   6  -11.90    5.60
 -15   4   5   -5.50    5.70
  15  -5  -4   10.80    4.30
 -15   5   4    7.10    6.00
 -15   6   3    6.50    4.90
 -15   7   2   22.80    5.00
 -15   8   1   50.19    6.00
 -15   9   0   -0.10    2.60
 -15  10  -1   37.80    6.00
 -15  11  -2   15.20    5.00
 -15  12  -3   16.50    5.50
 -15  13  -4   18.80    6.60
 -14   1   7    6.10    7.90
 -14   2   6   28.60    9.40
 -14   3   5   33.90    8.70
  14  -4  -4   42.30    6.60
 -14   4   4   32.50    7.70
  14  -5  -3   40.60    6.10
 -14   5   3   65.39    8.40
  14  -6  -2   12.50    4.40
 -14   6   2    6.40    3.60
 -14   7   1   40.40    5.40
 -14   8   0  257.17   12.30
 -14   9  -1  157.18    9.60
 -14  10  -2   -2.70    3.50
 -14  11  -3    4.30    4.90
 -14  12  -4   -3.40    4.10
 -14  13  -5    1.00    4.70
 -13  -1   8   -1.90    8.30
 -13   0   7    8.70    8.90
 -13   1   6    1.40    6.70
  13  -2  -5   65.99    7.20
 -13   2   5   64.69   10.90
  13  -3  -4   50.59    6.60
 -13   3   4   41.60    8.30
  13  -4  -3    5.20    3.30
 -13   4   3    8.70    4.80
  13  -5  -2   87.69    7.90
 -13   5   2   90.89    7.80
  13  -6  -1   28.40    5.10
 -13   6   1   28.00    5.20
 -13   6   1   32.50    4.80
 -13   7   0    2.10    2.50
 -13   8  -1   32.20    4.70
 -13   9  -2  141.99   10.00
 -13  10  -3   23.60    5.90
 -13  11  -4    3.50    4.60
 -13  12  -5   -0.10    4.60
 -13  13  -6   -5.60    4.50
 -12  -2   8    0.30    8.00
 -12  -1   7   10.20    8.80
 -12   0   6   48.10   10.90
  12  -1  -5   44.40    5.60
 -12   1   5   32.40    8.60
  12  -2  -4    2.30    2.90
 -12   2   4   -5.20    4.30
  12  -3  -3   43.90    5.60
 -12   3   3   41.90    6.80
  12  -4  -2    0.40    2.80
 -12   4   2    8.70    3.60
  12  -5  -1    5.70    3.10
 -12   5   1    3.20    2.70
  12  -6   0   26.40    4.90
 -12   6   0   23.00    3.70
 -12   6   0   19.50    4.60
 -12   7  -1    9.70    3.30
 -12   8  -2   22.90    4.50
 -12   9  -3   20.30    5.60
 -12  10  -4   26.80    6.60
 -12  11  -5    4.50    5.90
 -12  12  -6    7.00    5.40
 -11  -3   8   -7.90    6.50
 -11  -2   7    5.80    7.40
 -11  -1   6   10.00    7.40
  11   0  -5    2.60    2.70
 -11   0   5    1.80    5.60
  11  -1  -4    8.00    3.20
 -11   1   4    8.20    5.40
  11  -2  -3   27.80    4.70
 -11   2   3   17.50    5.00
  11  -3  -2  922.81   32.70
 -11   3   2  939.41   33.30
 -11   3   2  892.81   32.40
  11  -4  -1  299.77   13.80
 -11   4   1  310.97   14.40
 -11   4   1  298.27   12.50
  11  -5   0   -3.60    2.30
 -11   5   0    2.50    3.00
 -11   5   0    1.10    2.10
  11  -6   1  196.08   10.50
 -11   6  -1  184.58    9.70
 -11   6  -1  205.68   11.30
 -11   7  -2  222.48   11.60
 -11   8  -3   -1.40    3.50
 -11   9  -4   25.00    5.80
 -11  10  -5   96.39   10.00
 -11  11  -6    6.40    6.20
 -11  12  -7    2.00    5.70
 -10  -4   8   -7.10    7.80
 -10  -3   7   -5.30    6.00
 -10  -2   6   43.40   10.10
  10   1  -5   21.50    3.80
 -10  -1   5   20.20    6.90
  10   0  -4   10.80    3.10
 -10   0   4    9.20    5.20
 -10   1   3   11.50    5.00
  10  -2  -2   10.40    3.10
 -10   2   2   11.80    3.60
 -10   2   2   10.00    3.70
  10  -3  -1 1365.56   45.20
 -10   3   1 1344.67   44.00
 -10   3   1 1363.26   45.70
  10  -4   0 1143.89   39.60
 -10   4   0 1174.48   40.10
 -10   4   0 1211.18   38.60
  10  -5   1  118.79    7.60
 -10   5  -1  119.19    8.00
 -10   5  -1  119.49    7.30
  10  -6   2  106.29    7.10
 -10   6  -2   81.79    7.10
 -10   6  -2   92.69    7.60
 -10   7  -3  227.58   12.30
 -10   8  -4   48.40    7.50
 -10   9  -5   10.00    5.70
 -10  10  -6   59.69    9.20
 -10  11  -7   11.80    7.50
  -9  -5   8   11.10   10.10
  -9  -4   7   20.80    9.20
   9   3  -6    3.60    2.40
  -9  -3   6   -1.50    6.50
   9   2  -5  132.99    7.70
  -9  -2   5  108.79   11.60
   9   1  -4  754.92   26.60
  -9  -1   4  746.83   30.70
   9   0  -3  711.23   25.30
  -9   0   3  713.83   27.80
   9  -1  -2  547.45   20.00
  -9   1   2  521.75   20.20
  -9   1   2  531.45   20.40
   9  -2  -1  908.01   30.80
  -9   2   1  891.11   29.90
  -9   2   1  889.11   31.10
   9  -3   0   -0.50    1.80
  -9   3   0   -0.60    2.00
  -9   3   0    0.90    1.50
   9  -4   1  590.54   21.50
  -9   4  -1  592.94   21.10
  -9   4  -1  588.54   21.80
   9  -5   2   83.39    5.90
  -9   5  -2   78.59    6.30
  -9   5  -2   88.09    6.40
   9  -6   3   79.49    6.20
  -9   6  -3   66.59    6.30
  -9   6  -3   84.39    7.30
  -9   7  -4    0.00    3.70
  -9   8  -5   22.40    6.00
  -9   9  -6    2.20    5.70
  -9  10  -7    0.40    6.40
  -8  -6   8    3.90    9.10
  -8  -5   7    9.70    7.70
   8   4  -6    9.60    2.90
  -8  -4   6   14.50    7.10
   8   3  -5   52.09    5.00
  -8  -3   5   55.89    9.00
   8   2  -4    0.40    2.10
  -8  -2   4    0.70    4.20
   8   1  -3  345.67   13.50
  -8  -1   3  326.87   15.70
  -8  -1   3  327.87   14.00
   8   0  -2  854.81   28.80
  -8   0   2  815.92   29.00
  -8   0   2  873.91   29.90
   8  -1  -1  696.73   24.50
  -8   1   1  741.63   24.30
  -8   1   1  695.93   24.90
   8  -2   0 2219.08   68.69
  -8   2   0 2142.59   68.89
  -8   2   0 2170.88   67.79
   8  -3   1  393.96   14.90
  -8   3  -1  387.06   14.70
  -8   3  -1  394.46   15.10
   8  -4   2  420.46   15.50
  -8   4  -2  401.56   16.20
  -8   4  -2  411.06   15.90
   8  -5   3   72.49    5.10
  -8   5  -3   65.99    5.60
  -8   5  -3   64.39    6.90
  -8   6  -4  161.08    8.60
  -8   6  -4  163.38   10.60
   8  -7   5   24.30    8.50
  -8   7  -5   13.30    5.30
   8  -8   6   10.30    8.30
   8  -9   7    5.50    8.70
   8 -10   8   -6.10    9.40
  -7  -7   8   -9.60    7.80
  -7  -6   7    4.40    7.20
   7   5  -6    3.20    2.50
  -7  -5   6    5.40    6.40
   7   4  -5   39.30    4.40
  -7  -4   5   30.10    7.60
   7   3  -4   30.20    3.60
  -7  -3   4   30.50    6.80
   7   2  -3  300.47   11.90
  -7  -2   3  299.87   12.40
  -7  -2   3  286.17   14.30
   7   1  -2    4.20    1.70
  -7  -1   2    3.50    2.40
  -7  -1   2    6.00    2.10
   7   0  -1  966.00   31.90
  -7   0   1  974.30   31.80
  -7   0   1  974.00   32.20
   7  -1   0   -0.60    1.10
  -7   1   0   -0.50    1.20
  -7   1   0    0.70    1.00
   7  -2   1  192.08    8.20
  -7   2  -1  192.08    8.50
  -7   2  -1  192.48    8.20
   7  -3   2   68.29    4.40
  -7   3  -2   72.89    5.30
  -7   3  -2   76.79    4.90
   7  -4   3  283.47   10.80
  -7   4  -3  279.27   11.40
  -7   4  -3  258.17   12.90
   7  -5   4  277.77   11.00
   7  -5   4  312.77   18.30
  -7   5  -4  293.87   12.00
   7  -6   5    3.00    6.20
   7  -7   6    0.40    7.10
   7  -8   7    6.50    9.40
   7  -9   8  -12.60    8.10
  -6  -8   8   -8.80    6.60
  -6  -7   7    9.70    8.10
   6   6  -6   54.29    5.60
  -6  -6   6   42.70   10.30
   6   5  -5   11.10    3.00
  -6  -5   5   12.50    6.80
   6   4  -4  236.58   10.80
  -6  -4   4  313.87   16.30
   6   3  -3  182.88    8.00
  -6  -3   3  176.08    8.30
  -6  -3   3  174.68   10.50
   6   2  -2   40.30    3.30
  -6  -2   2   39.20    3.40
  -6  -2   2   35.40    4.40
   6   1  -1  110.19    5.40
  -6  -1   1  116.89    5.80
  -6  -1   1  104.29    5.50
   6   0   0 3762.72  111.09
  -6   0   0 3644.84  113.29
  -6   0   0 3465.35  111.09
   6  -1   1 1151.88   35.50
  -6   1  -1 1071.09   35.50
  -6   1  -1 1109.59   35.60
   6  -2   2  112.09    5.10
  -6   2  -2  106.69    6.10
  -6   2  -2  106.09    5.40
   6  -3   3    5.20    1.50
   6  -3   3    0.30    4.00
   6  -3   3    1.00    1.40
  -6   3  -3    2.70    1.60
  -6   3  -3    3.40    3.00
   6  -4   4    6.10    5.30
   6  -4   4    6.30    1.60
  -6   4  -4    7.40    2.10
   6  -5   5   57.69   10.30
   6  -6   6   38.60   10.10
   6  -7   7    5.60    8.20
   6  -8   8    2.20    9.70
  -5  -9   8   15.80    9.60
  -5  -8   7    4.80    8.70
   5   7  -6   -3.30    2.20
  -5  -7   6   -2.10    5.70
   5   6  -5   62.39    5.30
  -5  -6   5   44.00    9.40
   5   5  -4   61.19    5.10
  -5  -5   4   78.29    9.80
   5   4  -3  271.07   10.40
  -5  -4   3  247.68   10.50
  -5  -4   3  261.27   13.50
   5   3  -2   67.19    4.10
  -5  -3   2   69.79    4.30
  -5  -3   2   74.09    5.60
   5   2  -1  107.49    4.80
  -5  -2   1   91.69    5.20
  -5  -2   1   96.69    4.80
   5   1   0   -1.30    1.00
  -5  -1   0   -1.70    0.80
  -5  -1   0   -1.90    0.80
   5   0   1  313.57   11.60
  -5   0  -1  381.36   12.00
  -5   0  -1  326.47   12.00
   5  -1   2 1711.43   49.60
  -5   1  -2 1600.74   49.99
  -5   1  -2 1499.75   50.89
   5  -2   3  917.91   28.10
   5  -2   3  962.20   34.00
   5  -2   3  803.22   28.00
  -5   2  -3  925.31   28.90
   5  -3   4  254.67   15.60
   5  -3   4  253.37    8.50
   5  -4   5   31.00    7.70
   5  -5   6    4.10    6.40
   5  -6   7    6.30    9.00
   5  -7   8    4.50    9.60
  -4 -10   8    5.20   10.00
  -4  -9   7    6.80    9.00
   4   8  -6   83.89    6.80
  -4  -8   6   73.89   12.20
   4   7  -5  168.58    8.80
  -4  -7   5  151.78   13.90
   4   6  -4    4.80    2.40
   4   5  -3   43.80    3.70
  -4  -5   3   41.50    6.10
  -4  -5   3   34.50    3.60
   4   4  -2  119.99    5.80
  -4  -4   2  132.19    6.00
  -4  -4   2  126.99    7.70
   4   3  -1  786.22   25.00
  -4  -3   1  761.02   25.00
  -4  -3   1  775.62   26.00
   4   2   0  866.81   27.30
  -4  -2   0  830.42   27.20
  -4  -2   0  888.51   27.40
   4   1   1 1243.08   37.70
  -4  -1  -1 1315.97   38.00
  -4  -1  -1 1106.59   38.00
   4   0   2 1666.93   54.59
  -4   0  -2 1848.22   56.49
  -4   0  -2 1878.11   55.09
   4  -1   3  127.79    8.80
  -4   1  -3  117.79    4.90
   4  -2   4  274.77   16.10
   4  -3   5   23.40    7.10
   4  -4   6   12.10    6.60
   4  -5   7   -4.40    6.50
   4  -6   8   -1.70    9.20
   4  -7   9    1.50    8.90
  -3 -11   8    1.60    8.40
  -3 -10   7    0.10    7.60
   3   9  -6    2.80    3.00
  -3  -9   6   -4.50    7.00
  -3  -8   5    9.80    6.70
   3   7  -4  491.85   17.60
  -3  -7   4  426.86   22.20
   3   6  -3    1.90    1.70
  -3  -6   3    1.60    4.00
  -3  -6   3    1.10    1.60
   3   5  -2 1131.39   36.50
  -3  -5   2 1154.48   36.50
  -3  -5   2 1143.99   39.10
   3   4  -1  363.46   12.80
  -3  -4   1  364.56   12.80
  -3  -4   1  384.06   14.10
  -3  -3   0    2.60    1.00
   3   2   1 1415.26   43.30
  -3  -2  -1 1408.76   43.40
  -3  -2  -1 1412.66   43.30
   3   1   2   58.09    5.10
  -3  -1  -2   61.29    2.50
   3   0   3  471.15   19.00
  -3   0  -3  450.55   14.30
   3  -1   4   18.30    5.40
   3  -2   5   52.79    8.80
   3  -3   6    1.90    6.50
   3  -4   7   58.39   12.20
   3  -5   8   15.20   10.00
   3  -6   9    2.40    9.60
  -2 -12   8   -4.20    7.80
  -2 -11   7    7.40    9.60
  -2 -10   6   -5.20    6.30
   2   9  -5    4.80    2.80
  -2  -9   5   -1.80    5.20
   2   8  -4  173.38    9.10
  -2  -8   4  196.68   14.40
   2   7  -3    6.50    2.20
  -2  -7   3    0.20    3.50
  -2  -7   3    3.00    1.80
   2   6  -2  116.19    5.80
  -2  -6   2  107.99    7.60
  -2  -6   2  113.09    5.50
   2   5  -1  222.28    8.90
  -2  -5   1  242.88    8.90
   2   4   0 8158.58  254.97
  -2  -4   0 8152.18  253.77
  -2  -4   0 8399.46  255.57
   2   3   1 2891.11   88.29
   2   3   1 2810.62   88.39
  -2  -3  -1 2827.82   87.79
  -2  -3  -1 2870.91   88.59
   2   2   2  218.18    9.30
  -2  -2  -2  221.08    7.20
   2   1   3  332.07   14.70
   2   0   4  121.39    9.70
   2  -1   5   29.40    7.00
  -2   1  -5   36.20    2.50
   2  -2   6   86.09   11.60
  -2   2  -6   94.19    4.70
   2  -3   7   59.09   10.90
   2  -4   8    8.70    9.30
   2  -5   9   -0.90    9.30
  -1 -13   8    4.00   10.20
  -1 -12   7    7.60    8.90
  -1 -11   6   -5.10    7.50
   1  10  -5   20.80    4.10
  -1 -10   5   10.90    6.80
   1   9  -4  235.68   11.30
   1   8  -3   14.70    3.10
  -1  -8   3   10.80    5.50
   1   7  -2  144.79    7.20
  -1  -7   2  143.69    9.20
  -1  -7   2  148.29    6.80
   1   6  -1 1110.09   36.10
  -1  -6   1 1135.29   37.50
  -1  -6   1 1119.79   35.80
   1   5   0   -4.60    1.20
  -1  -5   0   -3.40    1.10
  -1  -5   0   -3.50    1.30
   1   4   1 3301.97  102.49
   1   4   1 3347.96  104.49
  -1  -4  -1 3547.45  102.89
  -1  -4  -1 3294.87  104.09
   1   3   2   18.40    2.40
  -1  -3  -2   25.60    1.90
   1   2   3  618.24   22.30
  -1  -2  -3  590.54   18.90
   1   1   4  142.69   10.00
  -1  -1  -4  150.18    5.10
   1   0   5   13.40    6.10
  -1   0  -5   18.20    1.80
   1  -1   6   -1.90    5.60
  -1   1  -6   -0.20    1.20
   1  -2   7   22.50    9.00
  -1   2  -7   25.80    2.70
   1  -3   8   34.00   10.70
   1  -4   9   -0.10    7.70
   0 -13   7   11.00   10.20
   0 -12   6   27.80   10.10
   0  11  -5    3.50    3.10
   0 -11   5   -0.60    6.50
   0  10  -4   18.10    3.90
   0 -10   4    7.40    6.60
   0   9  -3  688.83   24.90
   0  -9   3  696.43   29.60
   0   8  -2  846.72   28.30
   0  -8   2  815.32   31.00
   0  -8   2  810.22   27.60
   0   7  -1  904.91   30.20
   0  -7   1  899.51   29.80
   0  -7   1  924.31   31.60
   0   6   0 3722.23  113.19
   0  -6   0 3657.53  112.89
   0  -6   0 3677.63  113.09
   0  -5  -1  310.37   11.20
   0   4   2 1813.12   58.69
   0  -4  -2 2043.00   58.49
   0  -4  -2 1869.51   58.89
   0   3   3  452.25   17.10
   0  -3  -3  447.96   14.90
   0   2   4  114.19    9.00
   0  -2  -4  136.89    5.20
   0   1   5   13.50    5.70
   0  -1  -5   16.40    1.70
   0   0   6   -2.10    4.40
   0   0  -6    1.40    1.10
   0  -1   7    5.20    7.00
   0   1  -7    3.20    1.60
   0  -2   8   16.00    8.30
   0  -3   9    7.40    9.20
   1 -14   7   -0.20    9.90
   1 -13   6   -4.60    8.40
  -1  12  -5   39.50    6.00
   1 -12   5   38.90   11.20
  -1  11  -4   30.90    5.00
   1 -11   4   27.20    8.00
  -1  10  -3  717.53   26.50
   1 -10   3  712.83   30.90
   1 -10   3  746.03   26.60
  -1   9  -2    6.50    3.00
   1  -9   2   -0.70    4.40
   1  -9   2    6.20    2.40
   1  -9   2   11.30    3.50
  -1   8  -1  144.59    7.40
   1  -8   1  131.99    6.70
   1  -8   1  131.09    7.30
   1  -8   1  113.29    8.00
   1  -7   0    0.20    1.20
   1  -7   0   -0.80    1.40
   1  -7   0    0.40    1.40
  -1   6   1  110.89    3.60
  -1   6   1  105.79    4.10
   1  -6  -1   99.99    5.50
   1  -6  -1  104.09    5.40
  -1   5   2  657.33   20.40
   1  -5  -2  638.74   19.60
   1  -5  -2  619.54   21.40
  -1   4   3  107.29    6.20
   1  -4  -3  103.59    5.20
  -1   3   4 1454.45   49.40
   1  -3  -4 1470.35   45.80
  -1   2   5  222.88   13.90
   1  -2  -5  218.28    8.30
  -1   1   6    0.90    4.90
   1  -1  -6   -0.50    1.10
  -1   0   7   -6.30    5.90
   1   0  -7    4.50    1.60
  -1  -1   8   -0.80    7.60
  -1  -2   9   -5.90    6.50
   2 -15   7    0.40    8.80
   2 -14   6   -1.00    7.70
   2 -13   5    6.90    7.70
   2 -12   4   71.19   11.20
   2 -11   3   33.40    7.60
   2 -10   2  168.38   12.50
   2 -10   2  184.28   10.20
   2 -10   2  195.28   10.90
   2  -9   1  104.79    7.00
   2  -9   1   99.39    7.80
   2  -9   1  103.69    6.40
   2  -8   0   12.90    3.00
   2  -8   0   18.10    3.20
   2  -8   0   20.70    3.40
  -2   7   1  223.78    7.30
   2  -7  -1  207.68    9.40
   2  -7  -1  209.88    9.20
  -2   6   2   44.80    2.70
   2  -6  -2   48.10    4.10
   2  -6  -2   54.49    2.20
  -2   5   3  265.37   10.80
   2  -5  -3  257.47   10.50
  -2   4   4   32.20    4.90
   2  -4  -4   36.20    3.60
  -2   3   5  250.97   14.40
   2  -3  -5  244.38    9.80
  -2   2   6  109.99   11.30
   2  -2  -6  102.79    5.20
  -2   1   7   13.30    7.00
   2  -1  -7   13.40    2.10
  -2   0   8    7.80    8.00
  -2  -1   9    1.70    8.80
   3 -15   6   -5.40    9.30
   3 -14   5   15.20    9.70
   3 -13   4   19.90    8.60
   3 -12   3  113.69   11.90
   3 -11   2  969.30   38.40
   3 -11   2 1037.50   35.60
   3 -10   1  163.08    8.80
   3 -10   1  147.99   10.60
   3 -10   1  161.08    9.70
   3  -9   0   14.00    3.40
   3  -9   0    3.50    2.30
  -3   8   1  420.86   14.80
   3  -8  -1  495.95   17.30
   3  -8  -1  471.45   17.50
  -3   7   2  774.72   24.60
   3  -7  -2  767.92   26.60
  -3   6   3  194.08    8.70
  -3   6   3  175.88    8.30
   3  -6  -3  199.28    9.00
  -3   5   4  109.49    7.60
   3  -5  -4  108.89    6.40
  -3   4   5  118.09    9.60
   3  -4  -5  124.89    6.60
  -3   3   6   53.49    8.50
  -3   2   7    8.50    6.50
   3  -2  -7    5.60    1.90
  -3   1   8   -1.40    6.80
  -3   0   9   12.20    9.10
   4 -16   6    5.00    9.30
   4 -15   5   16.70   10.00
   4 -14   4   -0.90    7.00
   4 -13   3   -6.90    5.90
   4 -12   2    4.30    5.60
   4 -12   2    1.20    4.00
   4 -11   1  197.98   12.50
   4 -11   1  222.48   10.80
   4 -11   1  178.38   11.20
  -4  10   0  192.88    8.90
   4 -10   0  221.28   11.10
   4 -10   0  198.08   10.40
  -4   9   1   49.80    3.10
   4  -9  -1   58.09    5.90
  -4   8   2   23.90    2.50
  -4   8   2   24.80    3.80
   4  -8  -2   27.70    4.10
  -4   7   3  181.98    8.30
   4  -7  -3  178.48    9.10
  -4   6   4  247.78   11.90
   4  -6  -4  239.08   11.10
  -4   5   5   14.60    4.80
   4  -5  -5   14.10    3.00
  -4   4   6   -1.30    4.20
   4  -4  -6    1.00    1.80
  -4   3   7   -2.10    5.30
  -4   2   8   12.20    7.60
  -4   1   9    4.50    8.40
   5 -17   6   -1.20    9.50
   5 -16   5   -2.80    8.90
   5 -15   4   33.40   10.60
   5 -14   3    6.00    6.10
   5 -13   2   69.99   10.00
  -5  12  -1   62.49    6.40
   5 -12   1   75.79    7.90
   5 -11   0    3.70    3.40
   5 -11   0   13.00    3.90
  -5  10   1   24.20    2.70
   5 -10  -1   26.10    5.10
  -5   9   2   55.39    3.70
   5  -9  -2   81.69    7.00
  -5   8   3  245.08   10.40
   5  -8  -3  230.08   11.70
  -5   7   4   86.39    6.80
   5  -7  -4   90.39    7.00
  -5   6   5    9.60    4.20
   5  -6  -5   12.90    3.30
  -5   5   6    0.30    4.30
   5  -5  -6    0.40    2.00
  -5   4   7   12.30    6.30
  -5   3   8    1.80    6.60
   6 -17   5    9.50   10.20
   6 -16   4   20.50    8.70
  -6  15  -3    4.60    5.20
  -6  14  -2   40.40    6.50
  -6  13  -1  201.38   10.80
  -6  12   0  748.53   25.60
   6 -12   0  709.43   27.40
   6 -12   0  757.22   28.50
  -6  11   1  412.76   15.50
   6 -11  -1  496.45   19.40
  -6  10   2  186.88    8.30
   6 -10  -2  234.58   11.90
  -6   9   3  108.29    6.60
   6  -9  -3  123.39    8.50
  -6   8   4    5.20    3.00
   6  -8  -4    4.00    3.10
  -6   7   5    1.40    3.30
   6  -7  -5    2.80    2.80
  -6   6   6   47.40    7.60
   6  -6  -6   46.80    5.40
  -6   5   7   23.50    8.00
  -7  18  -5    0.00    4.90
  -7  17  -4    2.70    5.50
  -7  16  -3    5.90    4.70
  -7  15  -2   -0.10    3.80
  -7  14  -1  165.28    9.50
  -7  13   0   -0.70    2.30
   7 -13   0    2.50    3.30
  -7  12   1  375.76   13.90
   7 -12  -1  368.06   17.30
   7 -12  -1  386.56   17.10
  -7  11   2  301.67   12.40
   7 -11  -2  371.76   16.20
  -7  10   3  187.78    9.20
  -7   9   4  220.98   14.70
   7  -9  -4  251.97   12.80
   7  -8  -5   98.99    7.80
  -8  18  -4   -0.60    5.30
  -8  17  -3   33.30    7.10
  -8  16  -2   31.40    6.10
  -8  15  -1    1.50    3.00
  -8  14   0  135.29    7.80
  -8  13   1  171.48    7.90
   8 -13  -1  163.88   11.30
   8 -12  -2    4.60    3.30
   8 -11  -3   43.90    6.20
   8 -10  -4    0.20    2.90
   8  -9  -5   -0.90    2.80
  -9  19  -4    1.30    5.40
  -9  18  -3    2.10    4.90
  -9  17  -2    2.00    4.20
  -9  16  -1   19.80    5.40
   9 -13  -2   46.80    7.00
   9 -12  -3    2.60    3.60
   9 -11  -4   50.89    6.90
  10 -13  -3   19.90    5.30
  10 -12  -4    2.00    3.80
 -20   9   3    8.30    7.00
 -20  10   2    1.70    5.60
 -20  11   1    8.80    6.00
 -19   7   4   17.10    8.00
 -19   8   3    4.30    6.10
 -19   9   2   34.10    7.70
 -19  10   1   29.10    6.50
 -19  11   0    3.10    4.20
 -19  12  -1   15.20    5.50
 -18   5   5   -2.20    6.40
 -18   6   4    8.70    7.20
 -18   7   3   49.50    9.00
 -18   8   2   21.10    6.50
 -18   9   1   41.40    7.10
 -18  10   0  110.29    9.60
 -18  11  -1   26.10    5.80
 -18  12  -2    3.60    4.70
 -17   3   6   -2.40    7.70
 -17   4   5    3.50    6.90
 -17   5   4   -3.90    5.70
 -17   6   3   17.50    6.10
 -17   7   2   -1.50    4.50
 -17   8   1    0.40    3.30
 -17   9   0    1.30    3.30
 -17  10  -1   21.80    4.90
 -17  11  -2   10.40    5.10
 -17  12  -3   -0.90    4.20
 -16   1   7   -0.80    8.50
 -16   2   6    3.20    7.30
 -16   3   5    1.80    6.70
 -16   4   4   11.80    7.00
 -16   5   3    4.80    5.40
 -16   6   2   10.40    4.50
 -16   7   1   -0.60    3.20
 -16   8   0   12.90    3.80
 -16   9  -1    5.60    3.60
 -16  10  -2   12.80    5.00
 -16  11  -3   14.90    5.60
 -16  12  -4    3.80    5.60
 -15   0   7    6.60    8.30
 -15   1   6   -0.80    6.50
 -15   2   5    3.30    6.00
  15  -3  -4   10.70    3.90
 -15   3   4   15.80    6.80
  15  -4  -3   56.99    7.40
 -15   4   3   58.89    8.70
 -15   5   2  101.99    8.60
 -15   6   1   18.00    4.20
 -15   7   0    2.00    3.20
 -15   8  -1   47.40    5.90
 -15   9  -2   63.29    7.10
 -15  10  -3   35.30    7.00
 -15  11  -4   28.60    6.70
 -15  12  -5   12.40    6.40
 -14  -1   7    3.50    7.50
 -14   0   6   43.40   10.90
  14  -1  -5   30.70    5.40
 -14   1   5   22.10    7.70
  14  -2  -4    0.50    2.90
 -14   2   4    4.00    5.00
  14  -3  -3   18.30    4.60
 -14   3   3   15.30    5.70
  14  -4  -2   10.70    3.80
 -14   4   2    6.60    3.80
 -14   5   1   97.99    7.60
 -14   6   0   48.00    5.20
 -14   7  -1   32.10    5.10
 -14   8  -2    1.20    3.10
 -14   9  -3   27.20    5.80
 -14  10  -4   31.60    6.70
 -14  11  -5    9.90    6.00
 -13  -3   8    4.40    9.80
 -13  -2   7    1.90    8.50
 -13  -1   6    2.30    6.30
  13   0  -5   50.39    6.10
 -13   0   5   44.70    9.80
  13  -1  -4  219.78   11.80
 -13   1   4  202.18   15.00
  13  -2  -3   94.09    7.70
 -13   2   3   82.59    9.30
  13  -3  -2    8.10    3.60
 -13   3   2    7.80    4.30
  13  -4  -1   12.30    3.50
 -13   4   1    8.50    3.50
 -13   4   1   12.60    4.00
  13  -5   0   -0.70    2.60
 -13   5   0   13.40    3.40
 -13   5   0    6.90    4.80
 -13   6  -1   23.70    4.70
 -13   7  -2    9.00    3.90
 -13   8  -3   39.50    6.20
 -13   9  -4    0.20    4.00
 -13  10  -5   19.80    6.70
 -13  11  -6    4.80    5.90
 -12  -4   8   11.10   10.20
 -12  -3   7    5.10    7.30
 -12  -2   6    5.20    7.40
  12   1  -5   39.90    5.10
 -12  -1   5   51.49    9.90
  12   0  -4   33.80    4.90
 -12   0   4   37.90    7.30
  12  -1  -3   68.69    6.70
 -12   1   3   72.39    8.80
  12  -2  -2  140.79    9.00
 -12   2   2  140.49    9.50
 -12   2   2  153.88   10.00
  12  -3  -1   87.59    7.30
 -12   3   1   87.09    6.60
 -12   3   1   72.89    7.60
  12  -4   0  244.08   12.00
 -12   4   0  255.37   11.10
 -12   4   0  218.68   12.30
  12  -5   1    1.60    2.20
 -12   5  -1    4.50    3.10
 -12   5  -1    3.90    3.20
 -12   6  -2   81.19    6.90
 -12   7  -3   32.50    6.00
 -12   8  -4   14.00    5.50
 -12   9  -5    1.40    5.10
 -12  10  -6   29.00    7.70
 -12  11  -7    2.10    5.50
 -11  -5   8    9.90   10.10
 -11  -4   7   -5.30    6.90
 -11  -3   6    2.60    7.40
  11   2  -5   47.00    5.60
 -11  -2   5   46.60    9.90
  11   1  -4   19.70    3.80
 -11  -1   4   19.60    6.40
  11   0  -3    0.70    2.50
 -11   0   3   -2.70    4.00
  11  -1  -2  245.88   11.80
 -11   1   2  227.08   12.30
 -11   1   2  239.28   12.30
  11  -2  -1  912.41   31.90
 -11   2   1  900.61   31.20
 -11   2   1  919.01   32.60
  11  -3   0   -3.30    2.50
 -11   3   0    3.50    2.20
 -11   3   0    1.00    3.00
  11  -4   1  272.37   12.80
 -11   4  -1  306.87   12.60
 -11   4  -1  287.07   13.60
  11  -5   2   -0.20    2.40
 -11   5  -2    0.10    2.70
 -11   5  -2    1.40    2.90
 -11   6  -3   25.80    5.00
 -11   7  -4   66.69    7.50
 -11   8  -5   -4.60    3.60
 -11   9  -6    7.90    6.00
 -11  10  -7    6.70    6.50
 -10  -6   8   -0.90    8.70
 -10  -5   7   10.60    8.70
 -10  -4   6   53.29   10.70
  10   3  -5   -0.70    2.10
 -10  -3   5   -6.70    4.50
  10   2  -4   75.39    6.10
 -10  -2   4   82.09    9.50
  10   1  -3  729.13   26.20
 -10  -1   3  731.23   28.90
  10   0  -2  293.67   12.70
 -10   0   2  301.47   13.30
 -10   0   2  282.57   13.50
  10  -1  -1  718.63   25.80
 -10   1   1  731.03   25.40
 -10   1   1  733.23   26.30
  10  -2   0 3413.66  102.79
 -10   2   0 3200.48  102.99
 -10   2   0 3235.48  101.59
  10  -3   1 1380.16   45.20
 -10   3  -1 1357.66   45.70
 -10   3  -1 1387.46   44.90
  10  -4   2   -1.60    1.70
 -10   4  -2    1.20    2.50
 -10   4  -2    1.00    2.70
 -10   5  -3   -0.50    2.40
 -10   5  -3    0.70    3.10
 -10   6  -4    8.90    4.20
 -10   7  -5    0.50    4.80
 -10   8  -6   -6.30    5.00
 -10   9  -7   12.60    7.20
  -9  -7   8    5.00    9.30
  -9  -6   7   33.70   11.30
  -9  -5   6   -6.30    6.20
   9   4  -5   44.40    5.00
  -9  -4   5   44.80    9.10
   9   3  -4   49.80    4.90
  -9  -3   4   43.70    7.50
   9   2  -3   84.09    6.00
  -9  -2   3   74.09    7.80
   9   1  -2   12.00    2.70
  -9  -1   2    7.00    3.20
  -9  -1   2   18.50    3.40
   9   0  -1   17.00    3.00
  -9   0   1   15.30    2.70
  -9   0   1   17.20    3.00
   9  -1   0    2.40    1.70
  -9   1   0    0.20    1.30
  -9   1   0   -0.30    1.80
   9  -2   1  876.51   29.30
  -9   2  -1  874.21   29.20
  -9   2  -1  849.81   29.70
   9  -3   2 1725.53   55.09
  -9   3  -2 1707.33   55.69
  -9   3  -2 1758.92   56.09
   9  -4   3   31.90    3.60
  -9   4  -3   38.00    5.50
  -9   4  -3   36.10    4.30
  -9   5  -4   15.90    4.80
  -9   5  -4   21.80    3.70
  -9   6  -5    8.60    5.10
  -9   7  -6    2.40    5.20
  -9   8  -7   -0.70    5.80
  -9   9  -8    6.90    7.20
  -8  -8   8    6.30    8.70
  -8  -7   7    7.90    9.00
   8   6  -6   59.79    7.30
  -8  -6   6   35.70    9.50
   8   5  -5   49.99    5.20
  -8  -5   5   46.50    8.80
   8   4  -4    1.30    2.20
  -8  -4   4    8.10    6.10
   8   3  -3   10.00    2.50
  -8  -3   3    7.70    2.80
  -8  -3   3    5.50    3.90
   8   2  -2  200.98    9.20
  -8  -2   2  211.98    9.70
  -8  -2   2  220.68   10.80
   8   1  -1  126.69    6.60
  -8  -1   1  122.09    6.50
  -8  -1   1  126.29    6.80
   8   0   0   59.99    4.10
  -8   0   0   53.09    4.20
  -8   0   0   53.09    3.60
   8  -1   1  716.53   23.80
  -8   1  -1  676.43   24.10
  -8   1  -1  722.33   23.90
   8  -2   2   69.29    4.50
  -8   2  -2   72.69    5.20
  -8   2  -2   74.89    5.00
   8  -3   3  745.63   25.00
  -8   3  -3  765.82   25.90
  -8   3  -3  746.73   27.20
   8  -4   4   32.60    3.20
  -8   4  -4   36.50    6.20
  -8   4  -4   36.20    3.90
  -8   5  -5   53.59    7.40
   8  -6   6    9.20    7.70
   8  -7   7    9.90    9.70
   8  -8   8    1.30    9.80
  -7  -9   8   -1.00    8.80
  -7  -8   7   -1.70    6.60
   7   7  -6   14.00    4.00
  -7  -7   6   26.60    9.20
   7   6  -5    3.30    2.50
  -7  -6   5    2.60    5.20
   7   5  -4   89.49    6.10
  -7  -5   4   79.49   10.10
   7   4  -3  179.48    8.30
  -7  -4   3  177.98    8.80
  -7  -4   3  175.88   11.50
   7   3  -2  755.42   25.90
  -7  -3   2  775.92   28.10
  -7  -3   2  797.62   26.60
   7   2  -1  225.28    9.20
  -7  -2   1  228.08    9.70
  -7  -2   1  223.18    9.40
   7   1   0   -0.60    1.00
  -7  -1   0   -0.70    1.00
  -7  -1   0   -0.70    0.90
   7   0   1  945.31   31.00
  -7   0  -1  955.40   31.20
  -7   0  -1  993.90   31.50
   7  -1   2  149.69    6.40
  -7   1  -2  140.29    7.30
  -7   1  -2  151.68    6.80
   7  -2   3    6.80    1.60
  -7   2  -3    6.60    1.90
  -7   2  -3    5.90    2.90
  -7   3  -4  428.96   15.50
  -7   3  -4  425.16   18.10
   7  -4   5  167.48   15.20
   7  -5   6    6.80    7.70
   7  -6   7   13.70    9.70
   7  -7   8    0.80    8.90
  -6 -10   8    2.70    8.80
  -6  -9   7    2.70    8.30
  -6  -8   6    0.20    6.50
   6   7  -5    5.60    2.70
  -6  -7   5    2.50    6.00
   6   6  -4   -2.70    2.20
  -6  -6   4   -2.40    5.10
   6   5  -3  107.09    6.20
  -6  -5   3  131.09    9.50
  -6  -5   3  105.09    6.50
   6   4  -2   20.80    2.60
  -6  -4   2   20.80    2.70
  -6  -4   2   28.50    4.20
   6   3  -1  491.25   16.90
  -6  -3   1  489.45   17.10
  -6  -3   1  480.75   17.70
   6   2   0   82.39    4.20
  -6  -2   0   77.69    4.30
  -6  -2   0   79.49    4.10
   6   1   1  124.29    5.30
  -6  -1  -1  120.39    5.40
  -6  -1  -1  119.59    5.50
   6   0   2  189.98    7.30
  -6   0  -2  210.78    8.60
  -6   0  -2  186.98    7.60
  -6   1  -3  241.88   11.00
  -6   1  -3  248.88    9.30
   6  -2   4  211.28   14.00
  -6   2  -4  211.48    8.40
   6  -3   5  184.38   15.10
   6  -4   6   79.29   11.80
   6  -5   7   18.00    9.00
   6  -6   8   -9.50    6.70
   6  -7   9    2.80   10.90
  -5 -11   8   11.50    9.60
  -5 -10   7    3.90    8.90
  -5  -9   6   -5.30    5.80
   5   8  -5   56.19    5.80
  -5  -8   5   43.00    9.10
   5   7  -4  292.47   12.20
  -5  -7   4  264.87   16.70
   5   6  -3  274.57   11.40
  -5  -6   3  280.37   15.10
  -5  -6   3  286.77   11.60
   5   5  -2   33.80    3.40
  -5  -5   2   35.60    3.50
  -5  -5   2   34.60    4.80
   5   4  -1    4.00    1.40
  -5  -4   1    3.20    1.40
  -5  -4   1    6.10    2.10
   5   3   0    2.60    1.20
  -5  -3   0    2.10    1.10
   5   2   1   92.89    4.10
  -5  -2  -1   94.29    4.20
  -5  -2  -1   88.39    4.20
   5   1   2  621.74   19.70
  -5  -1  -2  625.14   21.10
  -5  -1  -2  624.04   20.10
  -5   0  -3 2153.48   64.09
  -5   0  -3 2018.00   65.99
   5  -1   4  143.49   11.10
  -5   1  -4  141.39    5.70
   5  -2   5   -4.70    5.50
   5  -3   6   -5.60    6.10
   5  -4   7    7.70    7.50
   5  -5   8    6.70    9.20
   5  -6   9    8.10    9.00
  -4 -12   8   -0.10    9.40
  -4 -11   7   -1.30    7.60
  -4 -10   6   -2.40    6.40
   4   9  -5   55.99    5.90
  -4  -9   5   64.69   10.60
   4   8  -4   49.10    5.20
  -4  -8   4   41.50    8.30
   4   7  -3  286.17   12.00
  -4  -7   3  284.17   15.50
  -4  -7   3  314.47   12.80
   4   6  -2  626.74   21.20
  -4  -6   2  606.14   23.70
  -4  -6   2  619.54   21.20
   4   5  -1  117.69    5.50
  -4  -5   1  116.69    6.60
  -4  -5   1  110.79    5.40
   4   4   0   51.29    3.10
  -4  -4   0   45.40    3.00
  -4  -4   0   41.90    3.20
   4   3   1  772.22   24.30
  -4  -3  -1  762.82   24.30
  -4  -3  -1  761.02   24.10
   4   2   2  582.14   18.50
  -4  -2  -2  588.64   18.60
  -4  -2  -2  595.84   19.60
   4   1   3   98.09    8.00
  -4  -1  -3  115.89    4.20
   4   0   4  269.87   15.10
   4  -1   5   68.59    9.60
   4  -2   6   -2.10    5.40
   4  -3   7    3.90    7.10
   4  -4   8    7.00    8.80
   4  -5   9    1.70    9.50
  -3 -13   8   -3.30    8.00
  -3 -12   7  -12.90    7.90
  -3 -11   6   -3.90    6.60
   3  10  -5   31.40    4.60
  -3 -10   5   18.00    7.70
   3   9  -4   24.60    4.00
  -3  -9   4   22.90    7.40
   3   8  -3  795.22   27.30
  -3  -8   3  784.82   31.50
   3   7  -2   67.79    4.80
  -3  -7   2   64.89    6.50
  -3  -7   2   70.59    4.50
   3   6  -1  989.70   31.80
  -3  -6   1  958.00   32.90
  -3  -6   1  981.00   31.60
   3   5   0   -0.80    1.00
  -3  -5   0   -1.00    1.10
  -3  -5   0   -1.30    0.80
   3   4   1  358.36   12.40
  -3  -4  -1  360.46   12.30
  -3  -4  -1  371.86   11.80
   3   3   2  894.41   28.10
  -3  -3  -2  910.51   28.60
  -3  -3  -2  905.81   28.10
   3   2   3  544.75   20.80
  -3  -2  -3  543.25   16.80
   3   1   4 1489.75   51.29
   3   0   5  183.58   13.90
   3  -1   6    3.70    5.40
   3  -2   7    2.50    6.70
   3  -3   8   38.10   11.40
   3  -4   9   17.50   10.10
  -2 -13   7   16.20    9.70
  -2 -12   6   36.70   10.70
   2  11  -5   14.30    4.10
  -2 -11   5    8.60    7.90
   2  10  -4  155.08    9.40
  -2 -10   4  136.79   13.50
   2   9  -3  503.65   19.40
  -2  -9   3  523.45   23.90
   2   8  -2   79.89    5.30
  -2  -8   2   64.19    7.00
  -2  -8   2   73.69    4.80
   2   7  -1  208.78    8.70
  -2  -7   1  200.88    8.40
  -2  -7   1  193.68    9.60
   2   6   0  135.49    6.30
  -2  -6   0  133.19    6.10
  -2  -6   0  136.29    6.30
   2   5   1  208.28    6.90
   2   5   1  202.58    8.00
  -2  -5  -1  216.48    7.10
  -2  -5  -1  203.28    7.90
  -2  -4  -2    1.10    0.90
   2   3   3   31.90    4.20
  -2  -3  -3   32.60    2.20
   2   2   4   -1.20    3.70
   2   1   5  207.98   13.60
   2   0   6   57.99    9.50
   2  -1   7   10.40    7.60
   2  -2   8    2.90    7.80
   2  -3   9    8.90    9.60
  -1 -14   7   15.00   11.20
  -1 -13   6   -5.90    8.20
   1  12  -5   40.40    5.70
  -1 -12   5   29.30    9.40
   1  11  -4    9.10    3.50
  -1 -11   4    6.90    5.90
   1  10  -3   15.60    3.80
   1   9  -2  580.14   20.20
  -1  -9   2  512.85   22.60
  -1  -9   2  523.55   19.30
   1   8  -1  718.33   24.50
  -1  -8   1  707.23   25.80
  -1  -8   1  697.93   24.00
   1   7   0   -1.90    1.30
  -1  -7   0   -0.40    1.50
  -1  -7   0   -2.10    1.10
   1   6   1 1149.69   34.30
   1   6   1 1119.49   36.30
  -1  -6  -1 1136.09   34.80
  -1  -6  -1 1110.79   36.00
  -1  -5  -2 1459.45   44.50
  -1  -5  -2 1461.95   45.70
  -1  -5  -2 1470.35   45.00
   1   4   3  133.09    7.00
  -1  -4  -3  125.09    5.40
  -1  -4  -3  123.69    5.30
   1   3   4   35.80    5.30
  -1  -3  -4   26.70    2.50
   1   2   5   21.40    6.10
  -1  -2  -5   29.40    1.90
   1   1   6    0.80    5.40
   1   0   7    6.90    7.00
   1  -1   8    5.50    8.40
   1  -2   9   17.50    9.00
   0 -15   7   -5.00    9.50
   0 -14   6   38.50   11.40
   0  13  -5   46.30    9.50
   0 -13   5   54.19   11.40
   0  12  -4   26.40    4.90
   0 -12   4   38.00    9.60
   0  11  -3    3.10    3.10
   0 -11   3   10.90    6.20
   0  10  -2  301.47   13.00
   0 -10   2  284.47   12.00
   0 -10   2  262.07   15.30
   0   9  -1   13.10    2.80
   0  -9   1    9.70    3.60
   0  -9   1   21.10    3.10
   0   8   0   47.10    4.50
   0  -8   0   63.19    4.30
   0  -8   0   51.49    4.30
   0   7   1  962.00   28.60
   0  -7  -1  900.41   30.50
   0  -6  -2  179.18    7.80
   0  -6  -2  185.08    7.80
   0   5   3 2013.50   63.59
   0  -5  -3 2047.00   63.19
   0   4   4  256.67   12.60
   0  -4  -4  251.07    9.60
   0   3   5  190.38   13.40
   0  -3  -5  238.88    8.40
   0   2   6   57.39    9.10
   0  -2  -6   59.09    3.00
   0   1   7    6.50    6.60
   0  -1  -7    2.40    1.20
   0   0   8   18.90    9.20
   0  -1   9    9.70    8.90
   1 -16   7   -5.20    7.50
   1 -15   6    0.70    9.50
   1 -14   5   -0.10    8.10
  -1  13  -4   55.59    6.90
   1 -13   4   54.49   11.10
  -1  12  -3  130.39    9.50
   1 -12   3  152.38   13.10
  -1  11  -2  651.03   24.70
   1 -11   2  640.94   27.50
   1 -11   2  652.73   24.60
  -1  10  -1   68.69    6.40
   1 -10   1   64.89    5.50
   1 -10   1   69.49    6.60
   1 -10   1   71.39    7.70
  -1   8   1  121.99    4.80
  -1   8   1  162.88    5.70
   1  -8  -1  138.59    7.30
   1  -8  -1  129.39    7.00
   1  -7  -2    5.70    2.00
   1  -7  -2    3.80    1.80
  -1   6   3    0.00    1.70
   1  -6  -3   -0.90    1.60
  -1   5   4  196.08   10.30
   1  -5  -4  202.28    8.70
  -1   4   5  254.57   14.10
   1  -4  -5  240.78    9.60
  -1   3   6    0.70    4.60
   1  -3  -6   -0.20    1.20
  -1   2   7   17.40    7.60
   1  -2  -7   23.50    2.50
  -1   1   8   12.10    7.90
  -1   0   9   11.20    8.80
   2 -16   6    2.10    8.30
   2 -15   5    4.00    7.70
   2 -14   4    7.40    7.70
   2 -13   3   82.39   11.00
   2 -12   2   22.50    4.60
   2 -12   2   23.60    6.60
   2 -11   1 1101.69   37.30
   2 -11   1 1113.99   38.20
   2 -11   1 1095.69   39.50
   2 -10   0 1225.38   41.30
   2 -10   0 1202.08   40.60
   2 -10   0 1244.68   41.10
  -2   9   1  102.09    4.10
   2  -9  -1   89.79    6.20
   2  -9  -1  107.29    7.00
   2  -8  -2  211.38    9.80
   2  -8  -2  195.98    9.30
  -2   7   3  293.17   10.70
   2  -7  -3  285.77   12.00
  -2   6   4  121.49    8.30
   2  -6  -4  174.28    8.00
  -2   5   5   78.49    8.30
   2  -5  -5   83.79    5.50
  -2   4   6  217.38   14.40
   2  -4  -6  209.38    8.90
  -2   3   7   57.09    9.80
   2  -3  -7   52.29    3.80
  -2   2   8   -6.60    6.20
  -2   1   9   16.80    9.30
   3 -17   6    5.40    9.30
   3 -16   5    1.30    8.50
   3 -15   4   11.70    8.30
   3 -14   3   25.90    8.10
   3 -13   2  276.07   16.70
   3 -12   1  434.66   20.10
   3 -12   1  435.06   17.90
   3 -12   1  461.15   19.10
  -3  11   0   -0.80    2.20
   3 -11   0   -1.00    2.80
   3 -11   0   -3.40    2.90
   3 -10  -1 1015.80   34.80
  -3   9   2    5.10    1.30
  -3   9   2    3.40    2.10
   3  -9  -2    1.80    2.90
  -3   8   3   11.50    2.20
   3  -8  -3   13.50    3.40
  -3   7   4   36.80    4.50
   3  -7  -4   35.00    4.50
  -3   6   5    2.30    3.70
   3  -6  -5    7.70    2.50
  -3   5   6    4.00    4.60
   3  -5  -6   12.00    2.60
  -3   4   7   45.80    9.10
  -3   3   8   32.00    9.10
   4 -17   5   -0.30    8.90
   4 -16   4    0.80    7.30
   4 -15   3   68.89   11.40
   4 -14   2   49.00    8.60
   4 -13   1   24.20    5.50
  -4  12   0  156.38    8.00
   4 -12   0  166.98   10.00
   4 -12   0  161.48   10.60
  -4  11   1  181.78    7.20
   4 -11  -1  174.68   11.10
   4 -11  -1  177.18   10.10
   4 -10  -2   13.40    3.80
  -4   9   3   29.20    3.40
   4  -9  -3   36.70    5.10
  -4   8   4    5.60    2.90
   4  -8  -4    3.60    2.80
  -4   7   5   32.90    5.70
  -4   6   6    1.10    4.10
   4  -6  -6    0.20    2.00
  -4   5   7    3.50    6.00
   5 -18   5    4.80    9.80
   5 -17   4    6.50    8.40
   5 -16   3   27.00    8.80
  -5  15  -2    0.00    3.70
  -5  14  -1   27.90    4.80
  -5  13   0    0.80    2.20
   5 -13   0   -9.10    3.50
   5 -13   0   -5.50    2.80
  -5  12   1   67.69    4.20
   5 -12  -1   85.89    7.50
   5 -12  -1   89.19    8.60
   5 -10  -3  219.78   11.80
   5  -9  -4  336.47   15.20
   5  -8  -5   43.30    5.70
   5  -7  -6    4.60    2.70
  -6  19  -5   10.70    6.70
  -6  18  -4   12.60    6.50
  -6  17  -3   32.00    6.90
  -6  16  -2    3.50    4.30
  -6  14   0   93.09    6.30
   6 -14   0   94.99    9.60
  -6  13   1  202.38    8.50
   6 -13  -1  192.08   12.30
   6 -12  -2   30.30    5.60
   6 -11  -3    1.70    3.20
   6 -10  -4   30.20    5.00
   6  -9  -5  104.19    8.30
  -7  19  -4   10.80    6.30
  -7  18  -3   16.90    6.10
  -7  17  -2  106.39    9.10
  -7  16  -1   23.70    4.60
   7 -14  -1  160.58   11.40
   7 -13  -2  484.25   21.30
   7 -12  -3  172.68   11.60
   7 -11  -4   46.50    6.50
   7 -10  -5   53.89    6.90
   8 -14  -2    0.10    3.60
   8 -13  -3   99.59    9.20
   8 -12  -4   63.99    8.20
   9 -14  -3    9.80    4.80
   9 -13  -4    6.20    6.90
 -20   6   4    4.10    6.30
 -20   7   3    6.30    6.00
 -20   8   2   -2.80    5.30
 -20   9   1   13.90    6.30
 -20  10   0   40.20    7.10
 -20  11  -1   12.80    5.00
 -19   4   5   -3.10    6.80
 -19   5   4    7.10    7.40
 -19   6   3    8.20    6.60
 -19   7   2   13.00    6.10
 -19   8   1   -1.20    4.20
 -19   9   0   -6.40    3.90
 -19  10  -1   39.50    6.50
 -19  11  -2   46.50    7.20
 -18   2   6   26.00   11.30
 -18   3   5   22.90    9.00
 -18   4   4    2.00    6.60
 -18   5   3   21.90    6.90
 -18   6   2   29.60    7.20
 -18   7   1   -2.80    3.40
 -18   8   0   -0.60    3.70
 -18   9  -1   25.90    5.30
 -18  10  -2    0.00    4.00
 -18  11  -3   37.10    7.40
 -17   1   6   -4.50    7.80
 -17   2   5   11.30    7.80
 -17   3   4   40.20    9.50
 -17   4   3    5.10    5.90
 -17   5   2    5.40    4.90
 -17   6   1   21.50    5.30
 -17   7   0    1.20    3.10
 -17   8  -1    3.70    3.90
 -17   9  -2   10.70    4.90
 -17  10  -3   -2.50    4.50
 -17  11  -4    9.70    5.20
 -16  -1   7  -14.90    7.10
 -16   0   6    8.40    8.70
 -16   1   5    7.50    6.80
 -16   2   4   -2.30    5.80
 -16   3   3   29.20    7.30
 -16   4   2   -4.30    3.90
 -16   5   1   51.39    6.60
 -16   6   0   16.70    4.00
 -16   7  -1   -1.10    2.60
 -16   8  -2    2.80    3.60
 -16   9  -3   -0.40    4.30
 -16  10  -4   -0.10    5.00
 -16  11  -5    6.70    5.20
 -15  -2   7    9.80    9.00
 -15  -1   6    7.70    8.60
 -15   0   5   23.40    8.10
  15  -1  -4   25.80    5.10
 -15   1   4   18.10    6.70
  15  -2  -3   46.20    6.00
 -15   2   3   40.90    8.00
 -15   3   2  206.88   12.80
 -15   4   1  171.38   10.50
 -15   5   0   -1.60    2.30
 -15   6  -1   20.60    4.30
 -15   7  -2   13.70    4.20
 -15   8  -3    5.80    4.20
 -15   9  -4    3.10    5.10
 -15  10  -5    4.90    5.60
 -14  -3   7    8.90    8.80
 -14  -2   6   -3.40    7.40
  14   1  -5    0.90    3.00
 -14  -1   5    3.50    6.80
  14   0  -4    0.30    2.70
 -14   0   4    1.90    5.60
  14  -1  -3   90.39    7.90
 -14   1   3   83.99    9.80
  14  -2  -2   67.09    6.80
 -14   2   2   61.09    7.10
  14  -3  -1  163.18   10.10
 -14   3   1  160.98    9.50
 -14   4   0  356.16   15.00
 -14   5  -1   98.89    7.60
 -14   6  -2    6.90    3.50
 -14   7  -3   -1.80    3.30
 -14   8  -4   15.10    5.00
 -14   9  -5    5.70    5.00
 -14  10  -6   -1.40    5.40
 -13  -4   7   19.10    9.70
 -13  -3   6   -3.80    7.00
  13   2  -5    8.10    3.50
 -13  -2   5    2.60    6.00
  13   1  -4   53.99    6.10
 -13  -1   4   46.70    9.00
  13   0  -3  201.58   11.00
 -13   0   3  191.18   12.80
  13  -1  -2    3.10    2.70
 -13   1   2    1.80    3.40
  13  -2  -1   -2.30    2.60
 -13   2   1   -0.40    2.90
 -13   2   1    1.20    2.60
  13  -3   0   -0.70    2.40
 -13   3   0    0.40    2.90
 -13   3   0    0.70    2.40
 -13   4  -1    8.90    3.50
 -13   5  -2   81.29    7.20
 -13   6  -3   18.10    4.90
 -13   7  -4   68.19    7.70
 -13   8  -5   -3.70    4.40
 -13   9  -6    8.80    6.10
 -12  -6   8   -5.30    7.20
 -12  -5   7   -6.00    7.90
 -12  -4   6   -5.60    6.80
 -12  -3   5    4.50    5.90
  12   2  -4   71.69    6.40
 -12  -2   4   72.59   10.20
  12   1  -3  120.39    8.10
 -12  -1   3  119.39   10.10
  12   0  -2   -0.20    2.50
 -12   0   2    0.70    3.00
 -12   0   2    0.80    3.30
  12  -1  -1    1.90    3.00
 -12   1   1    4.10    3.50
 -12   1   1    0.40    2.70
  12  -2   0  122.49    8.10
 -12   2   0  108.99    8.50
 -12   2   0  113.09    6.80
  12  -3   1  102.89    7.10
 -12   3  -1   74.99    7.30
 -12   3  -1   80.99    6.10
 -12   4  -2    7.00    5.40
 -12   4  -2   -0.20    2.70
 -12   5  -3   64.09    6.70
 -12   6  -4   -4.20    3.20
 -12   7  -5   72.19    8.40
 -12   8  -6    6.20    5.10
 -12   9  -7    1.30    5.90
 -11  -7   8    2.80    9.30
 -11  -6   7   11.10    9.60
 -11  -5   6   -5.60    5.90
  11   4  -5    2.10    2.40
 -11  -4   5    5.70    6.20
  11   3  -4    6.10    2.90
 -11  -3   4    9.40    5.70
  11   2  -3   29.50    4.20
 -11  -2   3   37.40    6.90
  11   1  -2  651.63   23.50
 -11  -1   2  599.64   24.40
 -11  -1   2  651.03   24.20
  11   0  -1   10.40    2.90
 -11   0   1    8.70    3.20
 -11   0   1   11.50    3.20
  11  -1   0   -1.30    2.10
 -11   1   0   -3.40    1.80
 -11   1   0    2.90    2.90
  11  -2   1  874.71   30.60
 -11   2  -1  922.91   30.60
 -11   2  -1  879.51   31.40
  11  -3   2  886.11   30.20
 -11   3  -2  850.51   30.80
 -11   3  -2  898.51   30.90
 -11   4  -3   65.39    6.60
 -11   4  -3   68.89    6.20
 -11   5  -4   79.49    7.70
 -11   6  -5   51.39    7.70
 -11   7  -6   -1.70    4.90
 -11   8  -7    6.70    5.60
 -10  -8   8   -1.70    8.70
 -10  -7   7    4.10    8.00
 -10  -6   6  104.69   14.20
  10   5  -5   79.49    6.80
 -10  -5   5   82.59   11.50
  10   4  -4    4.10    2.50
 -10  -4   4    4.50    5.00
  10   3  -3  169.38    8.80
 -10  -3   3  151.88   11.40
  10   2  -2  175.88    9.10
 -10  -2   2  181.38   10.80
 -10  -2   2  193.88    9.90
  10   1  -1   82.09    6.10
 -10  -1   1  124.59    7.20
 -10  -1   1  105.69    6.50
  10   0   0  377.56   14.20
 -10   0   0  354.96   13.50
 -10   0   0  331.07   14.20
  10  -1   1  710.63   24.80
 -10   1  -1  708.93   24.60
 -10   1  -1  723.93   25.40
  10  -2   2    8.10    2.30
 -10   2  -2    5.60    3.10
 -10   2  -2   10.80    2.90
  10  -3   3  618.24   21.90
 -10   3  -3  654.33   24.20
 -10   3  -3  631.44   23.00
 -10   4  -4  124.19    9.40
 -10   4  -4  121.69    7.60
 -10   5  -5    3.70    4.00
 -10   6  -6   20.50    6.20
 -10   7  -7    6.70    6.20
 -10   8  -8   -4.30    6.30
  -9  -9   8   16.10   10.10
  -9  -8   7    2.60    8.40
  -9  -7   6    5.00    7.00
   9   6  -5  106.99    7.50
  -9  -6   5   83.79   11.40
   9   5  -4  325.07   13.60
  -9  -5   4  302.97   18.00
   9   4  -3   28.30    3.70
  -9  -4   3   24.10    5.70
   9   3  -2   -0.30    1.80
  -9  -3   2    4.50    2.20
  -9  -3   2   -4.40    3.30
   9   2  -1  108.69    6.10
  -9  -2   1   95.59    6.30
  -9  -2   1   98.89    6.20
  -9  -1   0   17.40    2.50
   9   0   1   15.80    2.70
  -9   0  -1   18.70    3.00
  -9   0  -1   14.70    2.40
   9  -1   2  532.25   18.50
  -9   1  -2  531.05   19.20
  -9   1  -2  526.45   19.40
   9  -2   3  506.95   17.60
  -9   2  -3  513.05   19.80
  -9   2  -3  501.05   18.50
   9  -3   4   26.40    2.70
  -9   3  -4   20.40    5.00
  -9   3  -4   23.00    3.60
  -9   4  -5   62.69    8.00
  -9   4  -5   51.09    5.80
  -9   5  -6   -1.30    5.10
  -9   6  -7    2.20    5.50
  -9   7  -8    1.90    5.50
  -8 -10   8    1.60    9.60
  -8  -9   7    1.40    7.30
  -8  -8   6   14.40    8.20
   8   7  -5  100.09    7.20
  -8  -7   5   85.79   11.70
   8   6  -4    5.50    2.80
  -8  -6   4   -1.60    4.90
   8   5  -3  251.37   10.90
  -8  -5   3  238.28   14.00
   8   4  -2   18.70    2.80
  -8  -4   2   20.70    4.50
  -8  -4   2   17.40    2.90
   8   3  -1  435.16   15.50
  -8  -3   1  405.56   15.80
  -8  -3   1  427.46   16.30
   8   2   0   19.70    2.70
  -8  -2   0   30.10    3.10
  -8  -2   0   18.40    2.70
   8   1   1  141.19    6.60
  -8  -1  -1  158.78    6.80
  -8  -1  -1  141.09    6.90
   8   0   2  837.42   26.50
  -8   0  -2  792.92   27.50
  -8   0  -2  804.02   27.00
   8  -1   3    9.10    1.80
  -8   1  -3    6.20    2.90
  -8   1  -3    8.20    2.20
   8  -2   4  168.18    6.50
  -8   2  -4  179.08    8.10
  -8   2  -4  180.38   10.20
  -8   3  -5   -2.80    3.70
  -8   3  -5    3.60    1.90
  -8   4  -6   69.39    8.70
   8  -5   7   14.30    8.70
  -8   5  -7    0.90    5.50
  -8   6  -8    1.30    5.50
  -7 -11   8   -2.60    9.50
  -7 -10   7   -7.00    8.00
  -7  -9   6   12.90    8.70
   7   8  -5   16.50    3.60
  -7  -8   5   14.20    7.00
   7   7  -4   33.40    4.60
  -7  -7   4   17.00    6.50
   7   6  -3   24.30    3.90
  -7  -6   3   25.70    6.50
   7   5  -2  461.25   16.70
  -7  -5   2  450.95   18.80
  -7  -5   2  443.36   16.90
   7   4  -1 1106.49   35.10
  -7  -4   1 1061.99   35.40
  -7  -4   1 1074.89   36.20
   7   3   0    1.40    1.20
  -7  -3   0   -0.30    1.00
  -7  -3   0    2.70    1.50
   7   2   1  216.48    8.40
  -7  -2  -1  214.98    8.70
  -7  -2  -1  220.18    8.50
   7   1   2   10.50    1.50
  -7  -1  -2    9.70    2.30
  -7  -1  -2    6.40    1.60
   7   0   3  155.08    6.00
  -7   0  -3  159.28    8.30
  -7   0  -3  158.68    6.90
  -7   1  -4   50.59    3.90
  -7   1  -4   49.60    6.00
   7  -2   5    3.90    5.60
  -7   2  -5   -0.80    3.90
   7  -3   6   -4.40    5.60
   7  -4   7   43.40   11.70
   7  -5   8   22.70   11.00
   7  -6   9   -5.10    9.60
  -6 -11   7   29.60   11.50
  -6 -10   6   29.50    9.50
   6   9  -5    0.80    2.30
  -6  -9   5    9.10    6.40
   6   8  -4  177.48    9.40
  -6  -8   4  163.78   13.50
   6   7  -3  150.88    8.00
  -6  -7   3  149.69   11.80
   6   6  -2    1.10    1.80
  -6  -6   2    6.10    3.40
  -6  -6   2    2.00    1.80
   6   5  -1   18.40    2.60
  -6  -5   1   13.30    2.40
  -6  -5   1   14.80    3.30
   6   4   0 1033.30   32.90
  -6  -4   0  996.80   33.00
  -6  -4   0 1041.30   33.10
   6   3   1  481.65   16.00
  -6  -3  -1  455.75   15.80
  -6  -3  -1  480.45   16.20
   6   2   2   41.60    2.60
  -6  -2  -2   40.60    2.80
  -6  -2  -2   37.70    3.30
  -6  -1  -3    4.30    2.20
  -6  -1  -3    3.40    1.30
  -6   0  -4   22.10    4.70
  -6   0  -4   27.80    2.60
   6  -1   5   17.00    6.20
   6  -2   6    6.30    5.90
   6  -3   7   16.10    7.90
   6  -4   8    6.10    8.50
   6  -5   9   22.40   10.90
  -5 -12   7    9.30   10.10
  -5 -11   6    2.40    7.50
   5  10  -5    8.00    3.20
  -5 -10   5    3.70    6.60
   5   9  -4   17.60    3.90
  -5  -9   4   19.90    7.40
   5   8  -3   65.59    5.60
   5   7  -2   95.69    5.90
  -5  -7   2  104.09    6.00
  -5  -7   2  110.89    8.40
   5   6  -1   43.70    3.70
  -5  -6   1   43.40    4.30
  -5  -6   1   40.40    3.50
   5   5   0    0.00    1.10
  -5  -5   0    4.10    1.50
  -5  -5   0   -0.90    1.30
   5   4   1    2.30    1.00
  -5  -4  -1    1.40    0.90
  -5  -4  -1    1.40    1.10
   5   3   2   71.99    3.40
  -5  -3  -2   71.29    3.90
  -5  -3  -2   69.39    3.50
  -5  -2  -3  273.77   11.10
  -5  -2  -3  266.37    9.30
   5   1   4  198.48   12.90
  -5  -1  -4  199.28    7.00
   5   0   5    3.50    4.80
   5  -1   6    6.10    5.90
   5  -2   7   -0.80    7.40
   5  -3   8   12.90    9.40
   5  -4   9    4.10    9.30
  -4 -13   7   -4.70    7.50
  -4 -12   6   11.70    9.40
   4  11  -5    6.80    3.40
  -4 -11   5   -2.50    6.70
   4  10  -4  116.19    7.90
  -4 -10   4  128.39   13.40
   4   9  -3   42.70    5.10
  -4  -9   3   25.60    7.00
   4   8  -2  450.25   16.50
  -4  -8   2  413.96   18.80
  -4  -8   2  429.86   16.10
   4   7  -1  886.81   31.00
  -4  -7   1  862.21   30.80
  -4  -7   1 1084.89   33.10
   4   6   0   83.29    4.70
  -4  -6   0   93.29    5.10
  -4  -6   0   74.99    4.50
   4   5   1  117.29    5.30
  -4  -5  -1  115.89    4.70
  -4  -5  -1  114.69    5.20
   4   4   2  122.29    5.10
  -4  -4  -2  122.99    5.10
  -4  -4  -2  123.79    5.10
  -4  -3  -3  183.28    6.50
  -4  -3  -3  185.78    8.10
   4   2   4   33.20    6.10
   4   1   5  237.08   15.20
   4   0   6   78.79   10.30
   4  -1   7    3.20    7.20
   4  -2   8  -17.90    6.50
   4  -3   9   -1.20    7.30
  -3 -14   7    8.40    9.80
  -3 -13   6    9.40    9.10
   3  12  -5    5.00    3.60
  -3 -12   5   18.00    8.00
   3  11  -4    2.10    3.00
  -3 -11   4    1.90    6.20
   3  10  -3  624.44   23.50
  -3 -10   3  658.33   28.40
   3   9  -2 1793.52   58.29
  -3  -9   2 1844.12   57.99
  -3  -9   2 1810.02   61.49
   3   8  -1  386.36   14.80
  -3  -8   1  393.76   14.50
  -3  -8   1  379.56   16.00
   3   7   0    1.90    1.60
  -3  -7   0    3.80    1.80
  -3  -7   0    1.00    1.30
   3   6   1  983.60   32.40
  -3  -6  -1  995.10   32.20
  -3  -6  -1 1032.00   31.60
   3   5   2 1126.99   35.90
  -3  -5  -2 1143.79   35.10
  -3  -5  -2 1138.99   35.80
  -3  -4  -3  432.16   15.10
  -3  -4  -3  435.16   14.20
   3   3   4  486.55   20.00
  -3  -3  -4  475.15   15.10
  -3  -3  -4  462.85   14.90
   3   2   5  235.38   14.60
   3   1   6   -2.80    4.90
   3   0   7   40.40    9.80
   3  -1   8    7.80    8.20
   3  -2   9    6.50    9.80
  -2 -15   7    2.40    8.90
  -2 -14   6   44.00   12.70
   2  13  -5   77.09    9.50
  -2 -13   5   75.69   13.50
   2  12  -4    1.10    2.90
  -2 -12   4    2.60    6.30
   2  11  -3   35.70    5.00
   2  10  -2   10.20    3.20
  -2 -10   2   13.30    3.00
  -2 -10   2    6.90    4.90
   2   9  -1  841.72   29.40
  -2  -9   1  863.11   29.00
  -2  -9   1  872.81   31.00
   2   8   0 2014.50   66.69
  -2  -8   0 2169.58   66.49
  -2  -8   0 2169.28   66.89
   2   7   1  188.68    8.40
  -2  -7  -1  195.98    8.20
  -2  -7  -1  203.18    7.40
  -2  -6  -2  104.69    4.70
  -2  -6  -2  109.39    3.80
  -2  -6  -2  109.89    5.20
  -2  -5  -3  925.51   29.50
  -2  -5  -3  932.91   29.50
   2   4   4  280.17   13.20
  -2  -4  -4  270.97    9.70
  -2  -4  -4  271.77    9.50
   2   2   6  108.99   11.50
   2   1   7   21.50    8.10
   2   0   8    6.00    8.10
   2  -1   9    4.80    8.80
  -1 -16   7   -0.70    8.20
  -1 -15   6  -12.70    6.80
  -1 -14   5   18.70    9.90
   1  13  -4  202.98   11.90
  -1 -13   4  186.08   16.10
   1  12  -3   78.49    7.30
  -1 -12   3   73.49   10.10
   1  11  -2  265.27   13.50
  -1 -11   2  360.06   17.50
   1  10  -1  724.73   25.70
  -1 -10   1  705.33   26.90
  -1 -10   1  704.13   24.90
   1   9   0    0.60    1.80
  -1  -9   0   -1.70    2.00
  -1  -9   0    0.00    1.50
   1   8   1  663.53   23.80
  -1  -8  -1  695.03   22.10
  -1  -8  -1  705.33   23.40
  -1  -7  -2  141.99    6.70
  -1  -6  -3  237.78    9.60
  -1  -6  -3  243.28    8.50
  -1  -6  -3  250.47    9.50
   1   5   4  144.69    8.60
  -1  -5  -4  135.69    6.10
  -1  -5  -4  135.79    6.30
   1   4   5   49.30    7.00
  -1  -4  -5   61.09    3.70
  -1  -4  -5   54.19    3.60
   1   3   6    0.70    4.50
   1   2   7   13.70    7.30
   1   1   8    5.50    7.40
   1   0   9   -4.70    7.60
   0 -16   6   -3.10    9.00
   0 -15   5   20.70    9.50
   0  14  -4    4.10    3.80
   0 -14   4   -0.50    6.10
   0  13  -3  203.68   11.80
   0 -13   3  190.28   14.80
   0  12  -2    2.20    3.20
   0 -12   2    4.30    5.00
   0  11  -1   10.10    3.60
   0 -11   1    8.70    4.20
   0 -11   1    9.80    2.90
   0  10   0  370.16   15.40
   0 -10   0  370.06   15.10
   0 -10   0  364.06   14.50
   0   9   1   19.90    1.70
   0  -9  -1   25.00    3.50
   0  -9  -1   17.50    2.00
   0  -8  -2  777.72   26.40
   0  -8  -2  786.82   26.80
   0  -7  -3  150.68    5.20
   0  -7  -3  164.68    7.70
   0  -7  -3  165.78    7.50
   0   6   4   17.70    3.70
   0  -6  -4   25.40    3.00
   0  -6  -4   19.30    2.90
   0   5   5    3.40    4.10
   0  -5  -5   11.10    2.40
   0   4   6   83.59    9.70
   0  -4  -6  102.29    4.80
   0   3   7   34.60    8.80
   0  -3  -7   42.50    2.60
   0   2   8    5.30    7.30
   0   1   9    7.30    8.50
   1 -17   6    0.50    9.30
   1 -16   5   11.80    9.00
   1 -15   4    3.20    7.30
   1 -14   3   22.20    7.90
   1 -13   2  298.47   17.50
   1 -13   2  321.37   16.10
   1 -12   1  452.45   17.80
   1 -12   1  451.95   18.90
   1 -12   1  435.16   19.90
   1 -11   0   -2.40    1.90
   1 -11   0   -2.60    2.70
   1 -11   0   -1.60    2.70
  -1  10   1   72.69    3.40
   1 -10  -1   69.69    5.90
   1 -10  -1   77.59    6.50
   1  -9  -2   10.80    3.00
   1  -9  -2    6.00    2.80
   1  -8  -3  437.56   16.70
   1  -8  -3  450.95   17.00
  -1   7   4  541.25   19.80
   1  -7  -4  557.64   19.90
  -1   6   5   48.60    6.30
   1  -6  -5   50.79    4.70
  -1   5   6    4.00    4.40
   1  -5  -6    1.80    1.80
  -1   4   7   54.19    9.70
   1  -4  -7   56.39    3.70
  -1   3   8   34.00    9.20
   2 -18   6    8.90    9.60
   2 -17   5    3.00    7.70
   2 -16   4   33.50   10.20
   2 -15   3   11.90    7.20
   2 -14   2   -3.30    5.10
   2 -13   1  221.68   12.50
   2 -13   1  240.88   13.90
   2 -12   0 1482.35   50.79
   2 -12   0 1504.85   49.99
   2 -12   0 1534.25   50.29
  -2  11   1 1092.79   34.80
   2 -11  -1 1139.39   38.70
   2 -11  -1 1121.69   37.90
   2 -10  -2  183.28    9.70
   2 -10  -2  175.38   10.30
   2  -9  -3   68.09    6.00
   2  -9  -3   76.49    6.60
  -2   8   4    2.50    2.40
   2  -8  -4    2.60    2.50
  -2   7   5    6.70    3.70
   2  -7  -5    9.30    2.90
  -2   6   6    4.70    4.30
   2  -6  -6    7.00    2.20
  -2   5   7   -1.30    5.80
   3 -18   5    4.90   10.00
   3 -17   4   14.00    8.70
   3 -16   3   -4.00    6.30
   3 -15   2    6.10    5.80
   3 -14   1   21.80    5.60
   3 -14   1   19.40    5.10
  -3  13   0   -2.70    2.10
   3 -13   0    1.90    3.80
   3 -13   0   -3.00    2.80
  -3  12   1  430.06   15.20
   3 -12  -1  455.05   18.70
   3 -12  -1  497.35   20.00
   3 -11  -2  680.13   25.40
   3 -11  -2  649.04   24.80
   3 -10  -3  175.58   10.50
   3 -10  -3  188.38   10.30
   3  -9  -4   74.89    6.70
   3  -8  -5   59.59    6.00
   3  -7  -6   20.80    3.50
   4 -19   5  -12.90    7.90
   4 -18   4   16.20    9.20
   4 -17   3    2.10    7.10
   4 -16   2   25.10    7.30
  -4  15  -1   -0.20    3.50
   4 -14   0    6.80    4.30
   4 -14   0   23.30    4.80
   4 -13  -1   11.50    4.10
   4 -13  -1   15.60    4.90
   4 -12  -2    3.70    3.80
   4 -12  -2    2.80    3.40
   4 -11  -3   96.89    8.50
   4 -10  -4    1.90    3.20
   4  -9  -5   35.50    5.10
   4  -8  -6    8.40    3.00
   5 -19   4    4.10    9.50
  -5  18  -3   11.70    5.50
  -5  17  -2   58.39    7.60
  -5  16  -1   12.20    4.10
   5 -14  -1   24.60    5.80
   5 -13  -2   60.89    7.40
   5 -12  -3   33.80    5.50
   5 -11  -4   84.79    8.00
   5 -10  -5  102.09    8.50
   6 -15  -1   12.50    4.90
   6 -13  -3   72.39    8.50
   6 -12  -4   31.20    5.40
   6 -11  -5   52.29    7.40
   7 -15  -2    6.90    4.40
   7 -14  -3    9.70    4.60
   7 -13  -4    2.10    3.50
   8 -15  -3   14.70    5.10
 -21   6   3    1.60    6.80
 -21   7   2   12.20    7.00
 -21   8   1   -6.20    4.80
 -21   9   0   -2.50    4.40
 -20   4   4    0.10    7.50
 -20   5   3   15.50    7.90
 -20   6   2    7.40    5.40
 -20   7   1    5.30    4.80
 -20   8   0   -8.00    3.40
 -20   9  -1    2.80    4.80
 -20  10  -2   -0.30    4.20
 -19   2   5   12.20    8.90
 -19   3   4   31.30    9.10
 -19   4   3   25.50    8.40
 -19   5   2   55.69    8.70
 -19   6   1   71.49    8.90
 -19   7   0    1.10    4.40
 -19   8  -1   -2.30    4.00
 -19   9  -2   31.10    6.10
 -19  10  -3   14.40    5.80
 -18   0   6    7.20    8.70
 -18   1   5   19.70    9.30
 -18   2   4    1.70    6.70
 -18   3   3    6.70    5.90
 -18   4   2    4.90    4.70
 -18   5   1   14.10    4.90
 -18   6   0   74.39    8.10
 -18   7  -1   -0.70    3.30
 -18   8  -2   15.00    4.80
 -18   9  -3    5.50    4.90
 -18  10  -4   19.10    6.60
 -17  -1   6   -5.90    6.50
 -17   0   5   -1.30    6.50
 -17   1   4   36.60    8.90
 -17   2   3   49.30    9.10
 -17   3   2   10.50    4.80
 -17   4   1    6.30    4.20
 -17   5   0   -2.90    3.00
 -17   6  -1   14.30    4.50
 -17   7  -2    0.10    3.90
 -17   8  -3   13.20    4.90
 -17   9  -4   -1.20    4.20
 -17  10  -5    6.30    5.30
 -16  -2   6   -1.70    7.00
 -16  -1   5   10.20    8.40
 -16   0   4   39.60    9.50
 -16   1   3   10.30    5.50
 -16   2   2    0.20    3.60
 -16   3   1   55.59    6.90
 -16   4   0  131.99    8.60
 -16   5  -1   41.00    5.50
 -16   6  -2   13.90    4.30
 -16   7  -3   12.10    4.80
 -16   8  -4    3.60    4.40
 -16   9  -5   -1.70    4.30
 -15  -4   7    2.60    9.20
 -15  -3   6    1.10    8.00
 -15  -2   5   -0.70    6.30
  15   1  -4    8.70    3.60
 -15  -1   4   10.40    6.90
  15   0  -3   10.60    3.90
 -15   0   3    8.50    5.10
  15  -1  -2    4.50    3.70
 -15   1   2    0.90    3.40
 -15   2   1   10.90    3.80
 -15   3   0    0.50    2.80
 -15   4  -1  176.18    9.80
 -15   5  -2  100.19    7.90
 -15   6  -3    3.80    4.00
 -15   7  -4    8.20    5.00
 -15   8  -5    4.80    4.70
 -15   9  -6    1.10    5.40
 -14  -5   7    2.80    9.00
 -14  -4   6   44.90   11.60
  14   3  -5   13.70    3.90
 -14  -3   5   12.90    7.60
  14   2  -4    2.70    2.90
 -14  -2   4    6.00    5.90
  14   1  -3   24.30    4.60
 -14  -1   3   25.10    6.40
  14   0  -2  175.68   10.20
 -14   0   2  154.18   10.60
  14  -1  -1   59.99    6.20
 -14   1   1   69.09    7.50
 -14   1   1   60.69    6.50
 -14   2   0  172.38    9.40
 -14   3  -1  166.48    9.10
 -14   4  -2    7.00    3.40
 -14   5  -3   48.30    6.40
 -14   6  -4    1.00    3.70
 -14   7  -5    4.20    4.40
 -14   8  -6   -4.10    4.90
 -13  -6   7   -3.90    8.50
 -13  -5   6   10.60    7.60
  13   4  -5   17.40    4.00
 -13  -4   5    6.70    6.60
  13   3  -4   18.30    3.80
 -13  -3   4   18.60    7.00
  13   2  -3   64.19    6.40
 -13  -2   3   66.19    8.60
  13   1  -2  311.67   14.00
 -13  -1   2  304.07   15.60
  13   0  -1   82.89    6.90
 -13   0   1   78.89    7.40
 -13   0   1   81.99    6.80
  13  -1   0    0.30    2.30
 -13   1   0    2.30    3.20
 -13   1   0   -0.30    2.60
 -13   2  -1    4.50    3.10
 -13   2  -1    0.60    2.30
 -13   3  -2    0.10    2.80
 -13   4  -3    7.10    3.50
 -13   5  -4   23.20    5.50
 -13   6  -5   49.00    7.50
 -13   7  -6    1.50    4.60
 -13   8  -7    1.20    5.30
 -12  -7   7  -12.60    7.40
 -12  -6   6    3.60    7.20
  12   5  -5    0.00    2.50
 -12  -5   5    1.20    7.10
  12   4  -4    6.30    3.00
 -12  -4   4    4.80    5.00
  12   3  -3  137.99    8.30
 -12  -3   3  130.29   10.90
  12   2  -2   20.40    3.80
 -12  -2   2   23.10    4.30
 -12  -2   2   20.10    4.90
  12   1  -1  455.75   17.80
 -12  -1   1  430.96   18.10
 -12  -1   1  442.96   18.40
  12   0   0  324.87   13.70
 -12   0   0  313.47   14.30
 -12   0   0  303.87   13.00
  12  -1   1    1.70    2.50
 -12   1  -1   -1.90    2.60
 -12   1  -1    3.60    3.10
 -12   2  -2  136.99    8.60
 -12   2  -2  139.39    8.30
 -12   3  -3   58.39    6.70
 -12   4  -4   -1.30    3.20
 -12   5  -5   14.30    5.00
 -12   6  -6   67.89    8.80
 -12   7  -7   10.20    6.00
 -11  -8   7   -5.60    7.40
 -11  -7   6    2.20    6.90
  11   6  -5   56.89    6.40
 -11  -6   5   47.40   10.20
  11   5  -4   77.59    6.50
 -11  -5   4   82.49   10.40
  11   4  -3   95.19    6.90
 -11  -4   3   89.69    9.30
  11   3  -2  674.33   24.50
 -11  -3   2  705.13   25.60
 -11  -3   2  669.73   26.70
  11   2  -1 1116.99   37.30
 -11  -2   1 1106.59   38.00
 -11  -2   1 1110.99   38.00
  11   1   0   -1.60    1.90
 -11  -1   0    0.70    2.10
 -11  -1   0   -3.00    2.20
  11   0   1    9.50    2.80
 -11   0  -1    7.90    2.90
 -11   0  -1    5.70    2.70
  11  -1   2  226.68   10.30
 -11   1  -2  246.78   11.30
 -11   1  -2  232.18   11.20
 -11   2  -3   17.50    4.10
 -11   2  -3   19.10    3.50
 -11   3  -4    1.00    3.60
 -11   4  -5   -0.80    3.50
 -11   5  -6   -4.10    3.90
 -11   6  -7   21.90    7.20
 -11   7  -8    1.80    5.00
 -10  -9   7    8.60    9.80
 -10  -8   6    2.90    6.90
  10   7  -5   53.79    5.90
 -10  -7   5   41.50    9.40
  10   6  -4   29.70    4.60
 -10  -6   4   14.20    7.00
  10   5  -3  224.18   10.80
 -10  -5   3  238.58   14.60
  10   4  -2    2.20    2.20
 -10  -4   2    2.70    3.60
 -10  -4   2    3.80    2.50
  10   3  -1  138.59    7.40
 -10  -3   1  130.99    7.90
 -10  -3   1  133.79    8.10
  10   2   0 1235.28   40.00
 -10  -2   0 1165.98   40.40
 -10  -2   0 1255.47   39.90
  10   1   1   78.99    5.20
 -10  -1  -1   76.69    5.60
 -10  -1  -1   75.79    4.90
  10   0   2  284.07   11.20
 -10   0  -2  279.87   11.90
 -10   0  -2  284.57   12.10
  10  -1   3   13.70    2.50
 -10   1  -3    7.20    3.10
 -10   1  -3   10.50    2.70
  10  -2   4  184.38    7.20
 -10   2  -4  158.78   10.20
 -10   2  -4  155.58    8.30
 -10   3  -5   31.10    6.00
 -10   4  -6    5.20    4.50
 -10   5  -7   -2.80    5.20
 -10   6  -8   -0.90    5.30
  -9 -10   7   12.00    9.80
  -9  -9   6   -2.10    6.60
   9   8  -5    2.10    2.80
  -9  -8   5   -4.10    6.30
   9   7  -4  274.67   12.60
  -9  -7   4  264.47   17.50
   9   6  -3  117.19    7.40
  -9  -6   3  115.09   10.30
   9   5  -2   67.59    5.50
  -9  -5   2   77.39    7.70
  -9  -5   2   68.09    5.70
  -9  -4   1   56.39    5.50
   9   3   0   -0.70    1.50
  -9  -3   0   -0.90    1.60
  -9  -3   0   -1.30    1.40
   9   2   1  104.89    5.50
  -9  -2  -1   93.89    5.80
  -9  -2  -1  101.69    5.40
   9   1   2    9.60    2.00
  -9  -1  -2    8.00    2.40
  -9  -1  -2   12.00    2.60
   9   0   3  663.43   22.40
  -9   0  -3  696.13   23.60
  -9   0  -3  695.33   24.80
  -9   1  -4  195.98   10.70
  -9   1  -4  208.18    9.10
  -9   2  -5   -0.90    1.80
  -9   2  -5    1.10    3.70
  -9   3  -6   -1.90    4.10
  -9   4  -7    8.60    6.30
  -9   5  -8   -3.30    5.20
  -8 -11   7    1.40    8.10
  -8 -10   6    9.20    7.60
   8   9  -5   20.90    4.20
  -8  -9   5   23.00    8.50
   8   8  -4  117.29    7.70
  -8  -8   4  105.59   12.10
   8   7  -3   13.70    3.30
  -8  -7   3   19.40    6.40
   8   6  -2  352.06   14.10
  -8  -6   2  356.76   14.50
  -8  -6   2  345.97   16.70
   8   5  -1   25.30    3.10
  -8  -5   1   21.50    3.10
  -8  -5   1   24.30    4.00
   8   4   0 1058.79   34.20
  -8  -4   0 1025.90   34.30
  -8  -4   0 1058.79   34.60
   8   3   1  431.46   15.00
  -8  -3  -1  417.26   14.90
  -8  -3  -1  422.76   15.40
   8   2   2  212.18    8.20
  -8  -2  -2  207.08    8.70
  -8  -2  -2  205.58    8.80
   8   1   3  335.07   11.50
  -8  -1  -3  322.87   12.30
  -8  -1  -3  331.47   13.50
  -8   0  -4   54.59    6.20
  -8   0  -4   50.79    4.00
  -8   1  -5   55.59    6.80
  -8   1  -5   52.79    4.00
  -8   2  -6   -4.60    3.60
  -8   3  -7   -3.30    5.30
  -8   4  -8    1.60    5.40
  -8   5  -9    1.00    6.30
  -7 -12   7   -1.40    8.40
  -7 -11   6    2.10    8.10
   7  10  -5    2.00    3.20
  -7 -10   5    0.40    6.50
   7   9  -4   -0.50    2.20
  -7  -9   4   -7.70    4.50
   7   8  -3  401.06   16.00
  -7  -8   3  389.16   20.00
   7   7  -2  286.97   11.80
  -7  -7   2  279.27   12.00
  -7  -7   2  264.37   14.20
   7   6  -1  329.87   12.80
  -7  -6   1  341.67   13.10
  -7  -6   1  317.77   14.00
   7   5   0    2.10    1.50
  -7  -5   0   -0.90    1.30
  -7  -5   0    0.30    1.60
   7   4   1 1105.09   34.70
  -7  -4  -1 1065.69   34.40
  -7  -4  -1 1070.59   34.80
   7   3   2  760.72   24.80
  -7  -3  -2  778.72   25.40
  -7  -3  -2  760.12   25.10
   7   2   3  283.07    9.80
  -7  -2  -3  290.27   10.60
  -7  -2  -3  284.67   11.80
  -7  -1  -4  545.35   20.90
  -7  -1  -4  547.55   18.20
  -7   0  -5  105.49    4.80
  -7   0  -5  100.89    8.00
  -7   1  -6   -0.30    3.70
   7  -2   7    2.50    7.00
   7  -3   8   13.60    8.60
   7  -4   9    5.50    9.60
  -7   4  -9   19.70    6.90
  -6 -13   7    2.70    9.50
  -6 -12   6   49.50   11.70
   6  11  -5   49.00    6.00
  -6 -11   5   41.80   10.30
   6  10  -4    8.10    3.30
  -6 -10   4    2.70    5.80
   6   9  -3   67.19    6.10
  -6  -9   3   77.09    9.70
   6   8  -2   21.00    3.50
  -6  -8   2   20.60    3.50
  -6  -8   2   24.70    5.30
   6   7  -1    3.30    2.00
  -6  -7   1    6.60    2.10
  -6  -7   1    4.50    2.90
   6   6   0   29.90    3.10
  -6  -6   0   24.20    2.90
  -6  -6   0   40.70    3.60
   6   5   1   13.60    2.10
  -6  -5  -1   13.60    1.90
  -6  -5  -1   10.10    1.80
   6   4   2   30.70    2.50
  -6  -4  -2   24.70    2.50
  -6  -4  -2   24.00    2.50
  -6  -3  -3  180.18    8.20
  -6  -3  -3  185.28    7.10
  -6  -2  -4   94.79    6.70
  -6  -2  -4   97.59    4.30
  -6  -1  -5   43.10    6.10
   6   0   6    5.40    6.20
   6  -1   7   -5.80    6.90
   6  -2   8    4.30    8.70
   6  -3   9    1.20    9.80
  -5 -14   7   -5.20    7.60
  -5 -13   6   10.60    8.50
   5  12  -5   14.50    4.60
  -5 -12   5   13.80    7.50
   5  11  -4   80.19    7.20
  -5 -11   4   87.19   12.00
   5  10  -3    0.10    2.70
  -5 -10   3   -1.80    5.10
   5   9  -2   88.79    6.80
  -5  -9   2  108.39    9.00
  -5  -9   2   97.29    6.50
   5   8  -1   -0.60    1.80
  -5  -8   1    1.40    2.60
  -5  -8   1   -1.20    1.50
   5   7   0    2.00    1.70
  -5  -7   0   -1.10    1.80
  -5  -7   0    0.30    1.40
   5   6   1   46.80    3.50
  -5  -6  -1   43.50    3.30
  -5  -6  -1   44.10    3.10
   5   5   2   32.90    2.80
  -5  -5  -2   33.00    2.70
  -5  -5  -2   31.40    2.30
  -5  -4  -3  253.97    9.90
  -5  -4  -3  252.17    9.00
  -5  -3  -4   99.19    6.40
  -5  -3  -4  103.39    4.20
   5   2   5   98.69   10.40
   5   1   6   -5.10    5.10
   5   0   7   -1.30    6.80
   5  -1   8   13.90    9.00
   5  -2   9    0.60    8.90
  -4 -15   7   -2.50    9.40
  -4 -14   6   -5.50    8.30
   4  13  -5    1.80    5.90
  -4 -13   5   14.70    7.80
   4  12  -4    0.70    3.20
  -4 -12   4   -8.40    5.60
   4  11  -3   74.29    7.20
  -4 -11   3   68.49   10.00
   4  10  -2    5.30    2.80
  -4 -10   2    6.00    2.30
   4   9  -1  605.24   21.90
  -4  -9   1  616.54   21.60
  -4  -9   1  597.74   23.30
   4   8   0  501.75   18.30
  -4  -8   0  506.25   18.50
  -4  -8   0  503.45   18.00
   4   7   1  867.61   29.30
  -4  -7  -1  881.11   29.10
  -4  -7  -1  910.71   28.60
   4   6   2  616.34   20.60
  -4  -6  -2  613.64   20.40
  -4  -6  -2  608.84   19.50
  -4  -5  -3   41.10    2.90
  -4  -5  -3   41.00    3.00
  -4  -4  -4   21.60    3.60
  -4  -4  -4   18.50    1.90
   4   3   5  126.69   10.80
   4   2   6  221.28   15.60
   4   1   7   49.99   10.40
   4   0   8    0.20    7.50
   4  -1   9    9.20    9.40
  -3 -15   6   -5.80    7.30
  -3 -14   5   57.99   12.60
   3  13  -4   36.00    5.40
  -3 -13   4   41.00    9.30
   3  12  -3   45.10    6.00
  -3 -12   3   39.20    8.40
   3  11  -2  938.41   32.80
  -3 -11   2  919.21   35.80
   3  10  -1 1341.37   45.20
  -3 -10   1 1407.56   44.80
  -3 -10   1 1358.86   46.80
   3   9   0   -2.80    1.90
  -3  -9   0   -1.00    2.30
  -3  -9   0    1.00    1.70
   3   8   1  381.26   14.60
  -3  -8  -1  391.36   13.60
  -3  -8  -1  379.06   14.20
   3   7   2   77.29    4.70
  -3  -7  -2   73.39    4.40
  -3  -7  -2   68.69    3.10
  -3  -6  -3    2.30    1.20
  -3  -6  -3    5.90    1.70
  -3  -5  -4  251.37    9.00
  -3  -5  -4  247.18   10.20
   3   4   5   24.50    5.70
  -3  -4  -5   27.60    1.90
  -3  -4  -5   23.00    2.20
   3   3   6   -1.20    4.80
   3   2   7   48.60    9.50
   3   1   8   32.50    9.90
   3   0   9    3.00    8.30
  -2 -16   6   -8.50    8.70
  -2 -15   5   -2.00    8.50
   2  14  -4    3.60    3.50
  -2 -14   4    1.40    7.00
   2  13  -3  100.19    8.40
  -2 -13   3  106.29   12.20
   2  12  -2  126.19    9.10
  -2 -12   2  134.49   11.50
   2  11  -1  879.81   31.00
  -2 -11   1  882.11   32.50
  -2 -11   1  858.21   30.10
   2  10   0 3275.47  102.99
  -2 -10   0 3230.98  102.29
  -2 -10   0 3362.26  102.99
   2   9   1  855.11   29.20
  -2  -9  -1  847.92   28.70
  -2  -9  -1  856.51   27.70
  -2  -8  -2   69.29    4.50
  -2  -7  -3    3.40    1.60
  -2  -6  -4  220.18    8.50
  -2  -6  -4  207.98    8.60
  -2  -6  -4  205.58    8.60
   2   5   5   -5.40    3.30
  -2  -5  -5   -0.70    1.40
  -2  -5  -5   -0.40    1.40
   2   4   6   -0.60    4.80
   2   3   7    8.90    6.50
   2   2   8    0.10    6.90
   2   1   9    3.30    7.90
  -1 -17   6   -4.60    9.50
  -1 -16   5   13.60    9.00
   1  15  -4   21.60    5.20
  -1 -15   4   13.10    8.40
   1  14  -3   94.29    8.60
  -1 -14   3   98.89   12.50
   1  13  -2    5.80    3.60
  -1 -13   2    8.30    5.50
   1  12  -1   -1.10    3.00
  -1 -12   1   -4.60    4.20
  -1 -12   1    0.70    2.90
   1  11   0   -0.60    2.80
  -1 -11   0   -1.10    2.20
  -1 -11   0   -6.90    2.50
  -1 -10  -1  693.73   22.90
  -1 -10  -1  698.03   24.30
  -1  -9  -2  498.15   18.10
  -1  -8  -3    5.80    2.40
  -1  -8  -3    4.30    2.10
  -1  -7  -4   50.49    4.30
  -1  -7  -4   50.09    3.50
  -1  -7  -4   49.80    4.70
   1   6   5    9.90    4.30
  -1  -6  -5   17.90    2.70
  -1  -6  -5   19.50    2.70
   1   5   6    9.30    4.90
  -1  -5  -6    5.60    1.80
  -1  -5  -6    4.20    1.50
   1   4   7   -0.50    5.80
   1   3   8    2.40    6.80
   0 -18   6   13.80   11.00
   0 -17   5    7.70    9.30
   0  16  -4   44.90    9.00
   0 -16   4   45.90   11.30
   0  15  -3   11.50    4.60
   0 -15   3    1.20    6.30
   0  14  -2  170.78   11.10
   0 -14   2  150.88   12.90
   0  13  -1   81.59    8.20
   0 -13   1   84.99    6.80
   0 -13   1   96.89    9.00
   0 -13   1   89.59    8.10
   0 -12   0  301.87   13.80
   0 -12   0  293.17   13.20
   0 -11  -1   12.30    2.80
   0 -10  -2  276.17   12.10
   0 -10  -2  284.57   12.60
   0  -9  -3  684.53   23.90
   0  -9  -3  677.33   24.30
   0  -8  -4   52.39    2.80
   0  -8  -4   53.09    5.20
   0  -8  -4   56.19    5.30
   0   7   5   94.99    7.60
   0  -7  -5   87.09    5.90
   0  -7  -5  100.19    6.00
   0   6   6    7.40    4.50
   0  -6  -6    5.10    2.20
   0  -6  -6    9.90    2.30
   0   5   7    6.20    6.30
   0  -5  -7    0.10    1.70
   0  -5  -7    1.10    1.40
   1 -18   5   -4.50    8.60
   1 -17   4   -2.80    7.20
   1 -16   3   61.69   11.10
   1 -15   2   72.39   10.30
   1 -14   1   14.50    5.00
   1 -14   1   22.80    5.10
   1 -13   0   -1.40    3.20
   1 -13   0    2.70    3.40
   1 -13   0   -0.60    2.30
  -1  12   1  425.36   14.50
   1 -12  -1  456.15   17.90
   1 -12  -1  438.06   18.50
   1 -11  -2  632.04   23.30
   1 -11  -2  635.54   24.00
   1 -10  -3  678.13   24.80
   1 -10  -3  707.63   25.60
   1  -9  -4  816.32   29.00
   1  -9  -4  840.92   28.80
   1  -8  -5  327.27   13.60
   1  -8  -5  318.27   13.30
   1  -7  -6   10.40    2.50
   2 -19   5    6.70    9.20
   2 -18   4    2.40    8.10
   2 -17   3   16.10    7.80
   2 -16   2    9.20    6.10
   2 -15   1   24.80    6.10
   2 -14   0    9.70    3.90
   2 -14   0    6.30    2.80
   2 -13  -1  221.88   12.70
   2 -13  -1  218.98   11.60
   2 -12  -2   33.50    6.00
   2 -12  -2   19.80    4.30
   2 -11  -3   28.80    4.60
   2 -11  -3   25.10    4.60
   2 -10  -4   72.29    6.80
   2  -9  -5  123.99    8.00
   2  -8  -6  106.19    7.30
   3 -19   4   23.00   10.70
   3 -18   3   11.80    8.10
   3 -17   2   49.60    9.40
   3 -15   0    1.50    4.60
   3 -14  -1   24.00    5.60
   3 -13  -2  294.07   14.70
   3 -12  -3  117.69    9.20
   3 -11  -4    6.90    3.40
   3 -10  -5   -2.90    2.50
   4 -15  -1    7.60    4.60
   4 -14  -2   46.20    7.30
   4 -13  -3    2.40    3.60
   4 -12  -4   12.90    4.00
   4 -11  -5    1.90    3.10
   5 -16  -1   12.50    5.40
   5 -15  -2   -2.40    4.10
   5 -14  -3   21.00    5.10
   5 -13  -4   28.60    5.50
   6 -16  -2    3.80    4.20
   6 -15  -3    7.00    4.30
   6 -14  -4   18.70    5.80
   7 -16  -3    5.80    4.80
 -21   4   3    1.20    6.60
 -21   5   2   27.00    8.30
 -21   6   1   17.40    6.30
 -21   7   0   -5.30    4.80
 -21   8  -1   -3.90    4.60
 -20   2   4   14.90    7.90
 -20   3   3   -0.30    6.60
 -20   4   2    1.40    5.80
 -20   5   1   44.50    8.40
 -20   6   0   83.69    9.50
 -20   7  -1    5.90    4.70
 -20   8  -2    5.30    4.90
 -20   9  -3   10.10    5.50
 -19   0   5    9.00    7.80
 -19   1   4   44.60   10.60
 -19   2   3   32.50    8.10
 -19   3   2    0.70    5.30
 -19   4   1    1.60    4.90
 -19   5   0    3.90    4.50
 -19   6  -1   66.39    7.50
 -19   7  -2   15.30    4.90
 -19   8  -3    8.30    4.70
 -19   9  -4   -2.20    5.00
 -18  -2   6    5.40    8.80
 -18  -1   5    4.10    6.70
 -18   0   4    5.10    6.60
 -18   1   3   19.90    7.20
 -18   2   2   85.69    9.70
 -18   3   1    5.70    4.20
 -18   4   0    9.70    4.10
 -18   5  -1   20.70    5.10
 -18   6  -2   24.20    5.30
 -18   7  -3   20.70    5.40
 -18   8  -4    1.50    4.40
 -17  -3   6    0.70    8.60
 -17  -2   5   -0.50    6.60
 -17  -1   4    3.60    6.90
 -17   0   3   87.59   11.00
 -17   1   2   19.20    5.80
 -17   2   1    6.00    4.00
 -17   3   0   -2.90    2.90
 -17   4  -1    6.70    3.70
 -17   5  -2   -2.50    3.00
 -17   7  -4   46.80    7.60
 -17   8  -5    0.80    4.40
 -16  -4   6    3.50    7.90
 -16  -3   5    4.50    7.00
 -16  -2   4   23.20    8.40
 -16  -1   3   71.89   10.50
 -16   0   2    0.90    4.30
 -16   1   1    1.10    3.30
 -16   2   0    0.50    2.90
 -16   3  -1   50.69    5.70
 -16   4  -2    4.40    3.30
 -16   5  -3   -1.60    3.30
 -16   6  -4    1.40    4.40
 -16   7  -5   19.30    6.50
 -16   8  -6    1.20    4.90
 -15  -6   7    4.10    8.40
 -15  -5   6  -11.20    7.10
 -15  -4   5    7.60    7.20
  15   3  -4   23.70    4.60
 -15  -3   4   26.80    7.60
  15   2  -3   20.30    4.20
 -15  -2   3   16.70    5.90
 -15  -1   2   81.79    8.90
 -15   0   1   58.19    6.30
 -15   1   0    1.50    2.50
 -15   2  -1    6.80    2.90
 -15   3  -2  209.88   11.20
 -15   4  -3   44.10    6.20
 -15   5  -4    1.40    4.20
 -15   6  -5   -4.60    3.70
 -15   7  -6    5.00    4.80
 -14  -7   7   -2.40    8.80
 -14  -6   6   -5.60    6.50
 -14  -5   5   25.80    9.60
  14   4  -4   -0.60    2.60
 -14  -4   4    3.50    6.00
  14   3  -3   20.70    3.90
 -14  -3   3   22.70    6.30
  14   2  -2   -0.10    2.40
 -14  -2   2   -1.60    3.20
  14   1  -1   15.40    3.60
 -14  -1   1   18.80    4.20
 -14  -1   1   12.30    3.80
 -14   0   0   22.20    3.90
 -14   1  -1   57.79    5.30
 -14   2  -2   56.09    5.70
 -14   3  -3   16.40    4.30
 -14   4  -4   27.30    5.60
 -14   5  -5   -1.10    4.40
 -14   6  -6    5.90    5.60
 -14   7  -7   -7.20    4.70
 -13  -8   7    2.90    8.10
 -13  -7   6   -2.40    7.00
  13   6  -5    5.40    3.40
 -13  -6   5  -12.10    5.50
  13   5  -4   17.80    4.10
 -13  -5   4   14.50    6.50
  13   4  -3   -0.60    2.30
 -13  -4   3    2.00    4.40
  13   3  -2  283.77   12.80
 -13  -3   2  267.77   14.70
  13   2  -1  229.28   11.30
 -13  -2   1  228.68   12.20
 -13  -2   1  227.28   11.90
  13   1   0   -3.20    2.10
 -13  -1   0   -0.90    2.30
 -13  -1   0   -2.90    2.50
 -13   0  -1   77.49    7.10
 -13   0  -1   83.29    6.30
 -13   1  -2    4.40    3.40
 -13   2  -3   90.29    7.30
 -13   3  -4   41.90    6.00
 -13   4  -5    3.60    4.60
 -13   5  -6   -1.20    4.30
 -13   6  -7   10.80    6.30
 -12  -9   7    8.00    9.70
 -12  -8   6    6.40    8.80
  12   7  -5    8.20    3.80
 -12  -7   5    9.50    8.00
  12   6  -4   40.20    5.40
  12   5  -3   33.80    4.90
 -12  -5   3   34.70    7.30
  12   4  -2    0.60    2.30
 -12  -4   2    3.90    2.70
 -12  -4   2    2.10    4.40
  12   3  -1  448.76   17.20
 -12  -3   1  435.76   18.40
 -12  -3   1  425.66   18.00
  12   2   0 1456.45   47.60
 -12  -2   0 1428.46   48.40
 -12  -2   0 1475.15   47.90
  12   1   1  433.86   16.80
 -12  -1  -1  443.06   16.70
 -12  -1  -1  434.96   17.70
  12   0   2   -0.40    2.10
 -12   0  -2    0.10    2.50
 -12   0  -2    0.00    2.60
 -12   1  -3   83.09    7.30
 -12   2  -4    3.60    3.80
 -12   3  -5    7.00    4.00
 -12   4  -6    3.50    5.10
 -12   5  -7    8.40    5.40
 -12   6  -8   -0.70    5.50
 -11 -10   7   14.90    9.40
 -11  -9   6   -1.30    7.70
  11   8  -5   -1.20    2.60
 -11  -8   5   -6.90    5.80
  11   7  -4   60.29    6.30
 -11  -7   4   59.89   10.30
  11   6  -3   -1.20    2.30
 -11  -6   3    2.50    5.00
  11   5  -2   53.29    5.40
 -11  -5   2   52.79    5.90
 -11  -5   2   52.19    7.30
  11   4  -1  186.98    9.40
 -11  -4   1  187.58   10.50
 -11  -4   1  190.18   10.00
  11   3   0    0.60    2.00
 -11  -3   0   -1.50    2.10
 -11  -3   0   -3.00    2.00
  11   2   1 1085.99   36.00
 -11  -2  -1 1108.19   36.10
 -11  -2  -1 1086.69   36.90
  11   1   2  637.24   21.70
 -11  -1  -2  605.04   22.50
 -11  -1  -2  627.94   22.40
  11   0   3    0.80    1.50
 -11   0  -3    0.40    2.20
 -11   0  -3    1.30    3.10
 -11   1  -4   13.40    3.90
 -11   1  -4   11.00    2.70
 -11   2  -5   16.00    4.60
 -11   3  -6    4.10    4.20
 -11   4  -7    2.00    5.30
 -11   5  -8    7.80    5.50
 -10 -11   7    4.10    9.30
 -10 -10   6   46.90   11.50
  10   9  -5    8.40    3.60
 -10  -9   5    6.50    6.70
  10   8  -4   -0.90    2.40
 -10  -8   4   -8.10    5.20
  10   7  -3  282.07   12.90
 -10  -7   3  274.77   16.60
  10   6  -2  252.67   11.50
 -10  -6   2  248.08   13.80
 -10  -6   2  230.58   11.70
  10   5  -1   17.00    3.10
 -10  -5   1   26.70    4.00
 -10  -5   1   19.40    4.20
  10   4   0  163.98    8.40
 -10  -4   0  196.78    9.30
 -10  -4   0  165.38    8.80
  10   3   1  142.79    7.10
 -10  -3  -1  137.39    7.50
 -10  -3  -1  136.79    6.90
  10   2   2  186.28    8.40
 -10  -2  -2  196.68    9.00
 -10  -2  -2  204.78    9.30
  10   1   3  704.83   22.90
 -10  -1  -3  681.83   24.00
 -10  -1  -3  673.93   24.70
 -10   0  -4   16.80    3.00
 -10   0  -4   14.30    3.90
 -10   1  -5   18.80    4.90
 -10   1  -5   16.10    2.90
 -10   2  -6   -2.50    4.00
 -10   3  -7   -1.00    4.30
 -10   4  -8    1.40    5.90
  -9 -12   7   -1.50    8.50
  -9 -11   6   -0.10    7.20
   9  10  -5    7.40    3.70
  -9 -10   5   11.50    8.00
   9   9  -4    2.80    2.70
  -9  -9   4   -4.90    4.90
   9   8  -3  147.09    8.50
  -9  -8   3  124.29   11.60
   9   7  -2   95.49    6.90
  -9  -7   2   91.49    9.50
  -9  -7   2   92.79    7.30
   9   6  -1  119.89    7.00
  -9  -6   1  126.29    8.70
  -9  -6   1  116.99    7.30
   9   5   0    0.00    1.80
  -9  -5   0   -1.60    1.60
  -9  -5   0   -1.60    2.10
   9   4   1   55.59    4.20
  -9  -4  -1   49.80    3.90
  -9  -4  -1   53.39    4.40
   9   3   2    8.60    1.80
  -9  -3  -2    4.40    1.90
  -9  -3  -2   -0.10    2.00
   9   2   3   73.29    4.30
  -9  -2  -3   79.79    6.10
  -9  -2  -3   79.19    5.20
   9   1   4  768.12   24.30
  -9  -1  -4  786.32   26.00
  -9  -1  -4  771.82   28.00
  -9   0  -5  195.28    8.40
  -9   0  -5  204.18   11.50
  -9   1  -6   -0.20    4.10
  -9   2  -7   -1.70    5.00
  -9   3  -8    0.10    5.10
  -8 -13   7    4.40    9.20
  -8 -12   6    5.10    8.40
   8  11  -5    2.50    3.50
  -8 -11   5   16.40    8.50
   8  10  -4   36.50    5.00
  -8 -10   4   53.99    9.70
   8   9  -3  181.58    9.60
  -8  -9   3  131.49   12.10
   8   8  -2   25.20    4.00
  -8  -8   2   33.00    4.60
  -8  -8   2   14.50    5.50
   8   7  -1  478.65   17.90
  -8  -7   1  486.65   18.20
  -8  -7   1  469.85   19.50
   8   6   0   53.09    4.40
  -8  -6   0   51.59    4.60
  -8  -6   0   52.89    5.00
   8   5   1   27.30    3.10
  -8  -5  -1   26.10    3.30
  -8  -5  -1   26.10    3.00
   8   4   2   23.70    2.70
  -8  -4  -2   22.60    2.80
  -8  -4  -2   19.50    2.70
   8   3   3   11.00    1.80
  -8  -3  -3   11.10    2.90
  -8  -3  -3   12.90    2.30
  -8  -2  -4    4.20    3.10
  -8  -2  -4    2.60    1.60
  -8  -1  -5  292.27   10.60
  -8  -1  -5  284.57   13.70
  -8   0  -6  199.58   12.20
  -8   1  -7    9.40    5.70
  -8   2  -8   -3.90    4.70
  -8   3  -9   -0.40    6.10
  -7 -14   7   -4.30    9.10
  -7 -13   6   -6.10    7.60
   7  12  -5   65.29    8.80
  -7 -12   5   57.29   11.40
   7  11  -4   63.99    6.80
  -7 -11   4   62.29   10.90
   7  10  -3  221.88   11.50
  -7 -10   3  241.68   15.80
   7   9  -2  961.70   32.40
  -7  -9   2  912.71   35.20
  -7  -9   2  932.11   32.20
   7   8  -1  536.35   19.80
  -7  -8   1  539.85   21.50
  -7  -8   1  541.35   19.80
   7   7   0    1.70    1.70
  -7  -7   0   -1.60    1.40
  -7  -7   0   -4.10    2.00
   7   6   1  330.07   12.60
  -7  -6  -1  338.97   12.30
  -7  -6  -1  326.37   12.50
   7   5   2  449.46   15.60
  -7  -5  -2  442.06   15.30
  -7  -5  -2  442.46   15.60
   7   4   3  186.78    7.30
  -7  -4  -3  186.28    7.60
  -7  -4  -3  180.88    8.20
  -7  -3  -4   33.90    4.50
  -7  -3  -4   36.20    3.10
  -7  -2  -5    6.60    1.50
  -7  -2  -5    7.60    3.40
  -7  -1  -6    0.70    4.00
  -7   0  -7   47.70    7.30
  -7   1  -8   14.60    6.50
  -7   2  -9   -3.50    5.50
  -6 -15   7   -2.30    9.10
  -6 -14   6    1.00    8.60
  -6 -13   5   55.59   11.50
   6  12  -4    2.00    3.20
  -6 -12   4   -2.50    6.30
   6  11  -3   35.40    5.10
  -6 -11   3   35.90    8.00
   6  10  -2   90.09    7.10
  -6 -10   2   88.09    9.80
  -6 -10   2   94.79    6.80
   6   9  -1  141.59    8.00
  -6  -9   1  138.39    7.70
   6   8   0  268.57   11.40
  -6  -8   0  271.67   11.20
  -6  -8   0  265.77   11.70
   6   7   1    4.50    1.90
  -6  -7  -1    4.10    1.60
  -6  -7  -1    3.30    1.70
   6   6   2    2.60    1.50
  -6  -6  -2    0.50    1.30
  -6  -6  -2    0.20    1.00
   6   5   3   97.29    4.80
  -6  -5  -3  103.19    5.00
  -6  -5  -3   95.99    5.20
  -6  -4  -4  247.38   10.80
  -6  -4  -4  242.98    8.90
  -6  -3  -5    9.40    3.50
  -6  -2  -6   12.10    4.50
   6   1   7  -10.80    5.90
  -6  -1  -7    0.40    4.00
   6   0   8    2.60    8.20
   6  -1   9    0.60    9.10
  -5 -15   6   -0.50    8.70
  -5 -14   5   -4.40    6.60
   5  13  -4   27.70    5.30
  -5 -13   4   27.30    8.20
   5  12  -3   72.49    6.90
  -5 -12   3   70.39   10.10
   5  11  -2   -1.30    2.50
   5  10  -1  134.39    7.80
  -5 -10   1  110.19    7.00
  -5 -10   1  107.59    8.90
   5   9   0   -3.20    2.00
  -5  -9   0   -3.40    1.60
  -5  -9   0   -4.60    2.40
   5   8   1   -2.20    1.50
  -5  -8  -1   -0.80    1.50
  -5  -8  -1    0.90    1.60
   5   7   2   92.89    5.40
  -5  -7  -2   99.49    4.40
  -5  -7  -2   95.69    5.10
   5   6   3  280.87   10.50
  -5  -6  -3  277.37   10.40
  -5  -6  -3  282.97   10.20
  -5  -5  -4   60.79    4.80
  -5  -5  -4   66.79    3.60
  -5  -4  -5   13.30    3.60
  -5  -4  -5   15.00    1.50
  -5  -3  -6   12.50    4.40
   5   2   7   11.50    7.40
   5   1   8   -5.60    7.30
   5   0   9    2.40    9.00
  -4 -16   6   -0.70    8.20
  -4 -15   5    1.00    8.60
   4  14  -4   39.20    5.80
  -4 -14   4   25.70    9.10
   4  13  -3    3.20    3.50
  -4 -13   3    3.40    5.20
   4  12  -2   -4.40    2.60
  -4 -12   2    1.30    4.50
   4  11  -1  289.37   13.50
  -4 -11   1  301.77   12.80
  -4 -11   1  299.77   15.10
   4  10   0 1247.68   40.90
  -4 -10   0 1226.78   41.10
  -4 -10   0 1195.18   40.30
   4   9   1  576.24   21.00
  -4  -9  -1  615.44   20.40
  -4  -9  -1  559.04   20.50
   4   8   2  428.46   15.90
  -4  -8  -2  414.76   15.40
  -4  -8  -2  437.16   14.30
  -4  -7  -3  283.17    9.70
  -4  -7  -3  284.17   10.80
  -4  -6  -4    8.30    2.20
  -4  -6  -4    5.00    1.60
  -4  -5  -5   44.00    3.10
  -4  -5  -5   47.60    5.00
  -4  -5  -5   41.60    2.60
   4   4   6   11.10    5.50
   4   3   7   57.29   10.30
   4   2   8    4.50    7.50
   4   1   9   -2.60    8.30
  -3 -17   6   -1.40    9.40
  -3 -16   5   -5.70    6.80
   3  15  -4    8.50    4.40
  -3 -15   4   17.50    8.50
   3  14  -3   10.20    4.10
  -3 -14   3   17.30    7.30
   3  13  -2   14.60    3.70
  -3 -13   2   12.50    5.30
   3  12  -1   84.29    7.30
  -3 -12   1   85.69    6.60
  -3 -12   1   92.99    8.70
   3  11   0   -3.40    2.60
  -3 -11   0   -2.30    2.00
  -3 -11   0   -5.10    2.60
   3  10   1 1347.67   45.10
  -3 -10  -1 1362.86   44.50
  -3 -10  -1 1385.56   43.80
   3   9   2 1774.42   57.99
  -3  -9  -2 1860.01   56.09
  -3  -9  -2 1788.02   57.59
  -3  -9  -2 1832.42   55.69
  -3  -8  -3  779.92   23.90
  -3  -8  -3  760.72   25.80
  -3  -7  -4  452.15   16.00
  -3  -7  -4  461.95   15.50
  -3  -6  -5  157.88    8.30
  -3  -6  -5  180.68    7.00
  -3  -6  -5  174.78    7.40
   3   5   6   -5.60    3.90
   3   4   7    2.20    5.60
   3   3   8   24.50    9.10
  -2 -18   6   23.50   12.20
  -2 -17   5   16.30   10.10
   2  16  -4   -0.20    3.80
  -2 -16   4    9.50    8.30
   2  15  -3   37.10    6.10
  -2 -15   3   47.80   10.30
   2  14  -2   83.29    8.50
  -2 -14   2   69.99    9.70
   2  13  -1   10.00    4.00
  -2 -13   1    0.50    4.00
  -2 -13   1    8.50    2.90
   2  12   0  111.19    8.40
  -2 -12   0  112.09    8.20
  -2 -12   0  121.69    7.60
   2  11   1  881.51   30.80
  -2 -11  -1  861.51   29.90
  -2 -11  -1  865.61   28.80
  -2  -9  -3  510.15   18.40
  -2  -8  -4  184.58    6.60
  -2  -8  -4  178.38    8.10
  -2  -8  -4  180.18    8.60
  -2  -7  -5    4.20    1.80
  -2  -7  -5    1.80    1.90
  -2  -7  -5    5.00    2.40
   2   6   6    4.60    4.40
  -2  -6  -6    3.10    1.70
  -2  -6  -6    3.90    1.60
   2   5   7   -2.10    5.60
  -1 -18   5    6.20   10.00
  -1 -17   4   39.70   11.10
   1  16  -3    6.50    4.40
  -1 -16   3   10.10    7.40
   1  15  -2   -2.20    3.50
  -1 -15   2   -6.50    4.60
   1  14  -1   61.99    7.40
  -1 -14   1   63.59    8.20
   1  13   0    1.20    3.20
  -1 -13   0    1.40    3.40
  -1 -13   0    2.30    2.50
  -1 -12  -1   10.00    3.20
  -1 -12  -1   -0.80    2.40
  -1 -11  -2  225.98   11.00
  -1 -11  -2  267.37   12.30
  -1 -10  -3   15.40    3.50
  -1 -10  -3   14.10    3.00
  -1  -9  -4  199.28    9.30
  -1  -9  -4  198.08    9.90
  -1  -8  -5   50.19    4.70
  -1  -8  -5   54.29    5.00
  -1  -7  -6    2.60    2.00
  -1  -7  -6   -1.90    1.60
  -1  -6  -7    0.30    1.60
  -1  -6  -7   -0.60    1.30
   0 -19   5   12.50   10.00
   0 -18   4    2.10    7.90
   0 -17   3   90.89   13.20
   0 -16   2   -3.00    5.70
   0 -15   1   72.09    8.60
   0 -15   1   71.59    8.60
   0 -14   0   20.70    5.00
   0 -14   0   20.20    4.00
   0 -14   0   33.10    5.30
   0 -13  -1   79.79    7.70
   0 -13  -1   70.99    6.40
   0 -12  -2   -0.60    2.50
   0 -12  -2    3.20    3.20
   0 -11  -3   -2.00    2.20
   0 -11  -3    3.50    3.30
   0 -10  -4   34.70    4.60
   0  -9  -5  194.58    9.90
   0  -8  -6  184.28    9.20
   1 -19   4    4.10    8.50
   1 -18   3   22.90    8.60
   1 -17   2  175.78   15.10
   1 -16   1  108.79   10.70
   1 -15   0    0.80    3.30
   1 -14  -1   17.40    4.40
   1 -13  -2  299.57   14.90
   1 -12  -3  127.79    9.50
   1 -11  -4   25.80    4.60
   1 -10  -5   21.10    4.10
   1  -9  -6   -0.10    2.60
   2 -19   3   16.30   11.00
   2 -16   0  124.59   11.10
   2 -15  -1   31.80    6.20
   2 -14  -2    4.70    4.20
   2 -13  -3   57.79    6.80
   2 -12  -4   77.19    7.70
   2 -11  -5   46.90    6.00
   3 -16  -1   38.20    7.40
   3 -15  -2   15.70    5.00
   3 -14  -3   37.80    6.50
   3 -13  -4   19.80    5.00
   3 -12  -5    2.70    5.80
   4 -16  -2   23.00    5.90
   4 -15  -3   55.99    7.70
   4 -14  -4    4.60    3.80
   5 -17  -2   70.09    9.70
   5 -16  -3   26.90    6.10
 -22   4   2    0.40    5.50
 -22   5   1   10.30    6.80
 -22   6   0   14.20    6.70
 -21   1   4    6.30    8.10
 -21   2   3    5.90    7.40
 -21   3   2   -1.10    6.40
 -21   4   1    6.10    5.30
 -21   5   0    4.90    5.40
 -21   6  -1   16.30    5.60
 -21   7  -2    3.10    4.50
 -20   0   4   11.30    8.60
 -20   1   3   39.30    9.00
 -20   2   2   12.60    7.10
 -20   3   1    3.60    4.80
 -20   4   0   35.00    6.90
 -20   5  -1   43.20    7.20
 -20   6  -2    1.80    3.70
 -20   7  -3   13.40    5.00
 -19  -2   5    7.60    7.70
 -19  -1   4   -5.30    6.80
 -19   0   3    1.90    5.40
 -19   1   2    6.00    5.20
 -19   2   1   35.80    6.80
 -19   3   0    3.70    4.60
 -19   4  -1    6.30    4.60
 -19   5  -2   70.29    7.70
 -19   6  -3    2.80    4.50
 -19   7  -4   16.40    5.90
 -18  -3   5   14.70    9.20
 -18  -2   4   -5.30    6.40
 -18  -1   3    3.30    6.00
 -18   0   2   15.30    6.10
 -18   1   1    3.20    4.40
 -18   2   0   -4.70    3.20
 -18   3  -1    5.80    3.60
 -18   4  -2    2.00    4.00
 -18   5  -3   16.90    5.30
 -18   6  -4    3.60    4.90
 -18   7  -5   15.60    6.10
 -17  -5   6    2.80    8.70
 -17  -4   5    8.50    8.50
 -17  -3   4   -4.40    6.40
 -17  -2   3   18.50    7.40
 -17  -1   2  171.48   12.60
 -17   0   1   36.60    6.30
 -17   1   0    4.30    3.50
 -17   2  -1   10.20    3.80
 -17   3  -2    4.00    3.80
 -17   4  -3    6.10    4.20
 -17   5  -4    6.30    4.20
 -17   6  -5    4.30    5.20
 -16  -6   6   -2.40    8.00
 -16  -5   5   -5.80    7.30
 -16  -4   4   -2.40    5.30
 -16  -3   3   -2.60    4.50
 -16  -2   2    0.70    4.70
 -16  -1   1  112.89    9.10
 -16   0   0  129.69    9.20
 -16   1  -1   10.70    3.60
 -16   2  -2    2.90    3.20
 -16   3  -3   18.20    5.00
 -16   4  -4    9.70    4.90
 -16   5  -5    3.30    4.80
 -16   6  -6   14.30    5.70
 -15  -7   6   -2.10    8.50
 -15  -6   5   -1.80    7.00
 -15  -5   4   28.30    8.80
 -15  -4   3   56.79    9.20
 -15  -3   2   11.30    4.90
 -15  -2   1   19.00    5.00
 -15  -1   0   -1.30    2.40
 -15   0  -1   66.39    5.80
 -15   1  -2    0.40    3.00
 -15   2  -3   41.70    5.90
 -15   3  -4    8.40    4.20
 -15   4  -5    2.10    4.70
 -15   5  -6    2.00    4.60
 -15   6  -7    0.30    4.50
 -14  -8   6    9.30    9.50
 -14  -7   5    5.60    7.90
  14   6  -4   17.80    4.50
 -14  -6   4   13.90    7.60
  14   5  -3   16.60    3.90
 -14  -5   3   16.50    6.10
  14   4  -2   23.50    4.20
 -14  -4   2   36.90    7.00
  14   3  -1   26.10    5.10
 -14  -3   1   21.10    4.50
 -14  -2   0   18.10    3.80
 -14  -1  -1   14.60    3.30
 -14   0  -2  166.88    9.20
 -14   1  -3   79.49    6.90
 -14   2  -4    2.10    3.40
 -14   3  -5   33.10    6.20
 -14   4  -6    0.90    4.60
 -14   5  -7   -0.50    4.60
 -13  -9   6    6.40    8.80
 -13  -8   5    1.00    6.50
  13   7  -4    9.00    3.50
 -13  -7   4    4.80    5.80
  13   6  -3   90.39    7.60
 -13  -6   3   74.29   10.40
  13   5  -2   52.29    5.80
 -13  -5   2   60.89    7.80
  13   4  -1   13.20    3.40
 -13  -4   1   11.50    4.20
 -13  -4   1    8.40    3.30
  13   3   0   -2.20    2.10
 -13  -3   0   -1.10    2.30
 -13  -3   0   -2.90    2.70
 -13  -2  -1  223.28   10.50
 -13  -2  -1  229.58   12.10
 -13  -1  -2  316.27   13.70
 -13   0  -3  200.08   10.60
 -13   1  -4  201.78   11.70
 -13   2  -5   61.59    7.70
 -13   3  -6    1.80    4.30
 -13   4  -7    5.20    5.30
 -12 -10   6   40.60   12.00
 -12  -9   5   24.30    9.10
  12   8  -4   63.29    6.80
 -12  -8   4   68.59   11.50
  12   7  -3  158.08    9.30
 -12  -7   3  141.19   12.20
  12   6  -2   31.60    4.80
 -12  -6   2   28.00    6.50
  12   5  -1   58.79    5.60
 -12  -5   1   58.59    6.00
 -12  -5   1   70.99    6.90
  12   4   0  161.38    8.40
 -12  -4   0  148.09    8.90
 -12  -4   0  143.59    8.80
  12   3   1  436.06   16.70
 -12  -3  -1  441.36   16.90
 -12  -3  -1  434.16   17.50
 -12  -2  -2   27.90    4.20
 -12  -2  -2   31.50    4.20
 -12  -1  -3  136.79    8.40
 -12  -1  -3  127.99    8.70
 -12   0  -4   29.30    4.80
 -12   1  -5   43.10    6.50
 -12   2  -6   36.70    6.40
 -12   3  -7   -6.10    4.20
 -12   4  -8    2.70    5.70
 -11 -11   6    1.80    7.90
 -11 -10   5   37.90    9.60
  11   9  -4   64.99    6.80
 -11  -9   4   49.00    9.60
  11   8  -3   46.80    5.70
 -11  -8   3   37.80    7.50
  11   7  -2  400.86   16.50
 -11  -7   2  381.96   19.30
 -11  -7   2  419.86   19.40
  11   6  -1  402.46   15.90
 -11  -6   1  383.76   16.40
 -11  -6   1  388.96   17.30
  11   5   0   -3.00    2.20
 -11  -5   0    1.50    2.40
 -11  -5   0   -2.50    2.70
  11   4   1  187.88    9.00
 -11  -4  -1  198.28    9.60
 -11  -4  -1  190.18    9.00
  11   3   2  718.63   24.30
 -11  -3  -2  690.13   25.00
 -11  -3  -2  708.83   24.60
  11   2   3   36.70    4.00
 -11  -2  -3   34.00    4.30
 -11  -2  -3   34.80    4.60
 -11  -1  -4   19.30    4.00
 -11  -1  -4   21.60    3.40
 -11   0  -5    6.40    3.90
 -11   1  -6    4.10    4.30
 -11   2  -7    5.70    5.30
 -11   3  -8   -3.10    4.90
 -10 -12   6   25.00   11.20
 -10 -11   5   82.09   13.70
  10  10  -4    5.00    3.30
 -10 -10   4   11.00    6.70
  10   9  -3   53.99    6.00
 -10  -9   3   50.79    9.40
  10   8  -2   37.90    5.00
 -10  -8   2   40.10    6.10
 -10  -8   2   37.90    7.10
  10   7  -1   -2.80    2.60
 -10  -7   1    3.90    3.90
 -10  -7   1    1.30    2.60
  10   6   0  249.48   10.90
 -10  -6   0  240.88   11.20
 -10  -6   0  245.18   11.40
  10   5   1   22.80    3.20
 -10  -5  -1   20.90    3.20
 -10  -5  -1   19.60    3.10
  10   4   2    4.20    1.90
 -10  -4  -2    8.20    2.50
 -10  -4  -2    4.90    2.30
  10   3   3  174.18    7.70
 -10  -3  -3  192.68    8.70
 -10  -3  -3  172.78    8.80
  10   2   4   59.79    3.40
 -10  -2  -4   77.79    6.60
 -10  -1  -5   21.90    3.00
 -10  -1  -5   28.60    5.10
 -10   0  -6   64.09    7.30
 -10   0  -6   64.69    4.30
 -10   1  -7    6.20    4.60
 -10   2  -8    8.60    5.90
  -9 -13   6    8.40    9.40
  -9 -12   5   -3.40    6.80
   9  11  -4   31.90    5.30
  -9 -11   4   20.90    8.20
   9  10  -3   11.60    3.30
  -9 -10   3    4.20    5.10
   9   9  -2  352.56   15.50
  -9  -9   2  421.66   20.60
  -9  -9   2  352.76   18.40
   9   8  -1  151.88    8.80
  -9  -8   1  155.28   10.10
  -9  -8   1  155.58    9.10
   9   7   0    0.30    2.00
  -9  -7   0    0.60    2.90
  -9  -7   0    7.50    2.70
   9   6   1  114.79    6.70
  -9  -6  -1  124.29    7.00
  -9  -6  -1  121.29    6.60
   9   5   2   69.19    4.80
  -9  -5  -2   70.09    4.40
  -9  -5  -2   71.49    5.20
   9   4   3   33.20    3.30
  -9  -4  -3   27.50    3.60
  -9  -4  -3   35.20    3.70
   9   3   4   53.79    3.10
  -9  -3  -4   56.99    5.50
  -9  -3  -4   61.59    4.40
  -9  -2  -5  124.89    6.20
  -9  -2  -5  130.59    8.70
  -9  -1  -6   -1.70    3.80
  -9  -1  -6    0.10    1.30
  -9   0  -7   37.90    7.10
  -9   1  -8    5.40    5.30
  -9   2  -9   -4.10    5.10
  -8 -14   6   11.40    9.00
  -8 -13   5   -8.40    7.20
   8  12  -4   12.20    4.10
  -8 -12   4    9.70    7.40
   8  11  -3   -3.20    2.60
  -8 -11   3   -1.10    4.80
   8  10  -2   -0.60    2.60
  -8 -10   2   -4.50    4.60
   8   9  -1  598.64   21.60
  -8  -9   1  568.34   21.40
  -8  -9   1  561.14   23.10
   8   8   0 1185.28   39.30
  -8  -8   0 1193.18   40.10
  -8  -8   0 1179.18   39.30
   8   7   1  469.95   17.20
  -8  -7  -1  458.25   17.00
  -8  -7  -1  470.05   17.20
   8   6   2  348.97   13.20
  -8  -6  -2  342.37   12.60
  -8  -6  -2  343.97   13.20
   8   5   3  242.48    9.60
  -8  -5  -3  246.18   10.00
  -8  -5  -3  244.68   10.10
  -8  -4  -4    3.40    1.70
  -8  -3  -5   62.89    6.10
  -8  -3  -5   56.19    3.80
  -8  -2  -6  119.59    8.90
  -8  -1  -7   51.39    7.20
  -8   0  -8   -2.00    5.00
  -8   1  -9    7.20    5.70
  -7 -15   6   -5.60    7.90
  -7 -14   5    8.30    7.70
   7  13  -4   69.09    7.40
  -7 -13   4   66.99   11.50
   7  12  -3   33.50    5.10
  -7 -12   3   34.90    7.80
   7  11  -2  220.18   11.30
  -7 -11   2  207.78   13.60
   7  10  -1  582.44   21.80
  -7 -10   1  576.24   21.40
  -7 -10   1  559.24   23.40
   7   9   0    5.10    2.60
  -7  -9   0    8.00    2.50
   7   8   1  532.95   19.40
  -7  -8  -1  533.85   19.10
  -7  -8  -1  527.85   19.10
   7   7   2  271.77   11.20
  -7  -7  -2  278.07   10.50
  -7  -7  -2  288.47   11.30
   7   6   3   22.20    2.90
  -7  -6  -3   31.90    3.30
  -7  -6  -3   28.80    3.10
  -7  -5  -4   77.69    4.60
  -7  -5  -4   90.19    5.70
  -7  -4  -5   32.30    2.90
  -7  -4  -5   36.20    4.60
  -7  -3  -6   24.80    4.90
  -7  -2  -7   23.60    5.80
  -7  -1  -8   35.60    7.20
  -7   0  -9    4.60    6.00
  -6 -16   6   13.30   10.20
  -6 -15   5    5.40    7.70
   6  14  -4    6.70    4.40
  -6 -14   4    7.20    7.20
   6  13  -3    7.50    3.70
  -6 -13   3    3.50    6.00
   6  12  -2   78.09    7.00
  -6 -12   2   57.89    8.70
   6  11  -1  210.28   10.70
  -6 -11   1  191.68   12.20
  -6 -11   1  202.48   10.20
   6  10   0  403.36   16.10
  -6 -10   0  416.56   15.70
  -6 -10   0  366.36   16.50
   6   9   1  125.29    7.30
  -6  -9  -1  126.79    7.10
  -6  -9  -1  124.19    6.90
   6   8   2   24.00    3.30
  -6  -8  -2   27.50    3.00
  -6  -8  -2   18.00    2.80
   6   7   3  145.09    6.90
  -6  -7  -3  143.59    6.10
  -6  -7  -3  134.79    6.60
  -6  -6  -4   -0.70    1.90
  -6  -6  -4   -0.80    1.50
  -6  -5  -5   13.60    1.90
  -6  -5  -5   15.40    3.70
  -6  -4  -6    5.40    3.30
  -6  -3  -7    4.50    4.50
  -6  -2  -8    4.60    4.90
  -6  -1  -9   -2.90    4.90
  -5 -17   6    1.80    8.80
  -5 -16   5    5.30    7.90
   5  15  -4    0.60    3.50
  -5 -15   4    0.50    6.90
   5  14  -3   58.89    7.40
  -5 -14   3   53.69    9.40
   5  13  -2   87.19    7.90
  -5 -13   2   77.49    9.60
   5  12  -1    5.50    3.20
  -5 -12   1    2.10    2.30
  -5 -12   1   -0.30    3.80
   5  11   0    2.50    2.70
  -5 -11   0   -0.10    2.10
  -5 -11   0   -4.50    3.00
   5  10   1  119.69    7.40
  -5 -10  -1  113.89    6.80
  -5 -10  -1  118.99    7.00
   5   9   2   83.19    5.90
  -5  -9  -2   89.99    5.00
  -5  -9  -2   85.89    5.60
   5   8   3   61.09    4.80
  -5  -8  -3   67.49    4.60
  -5  -8  -3   66.69    3.50
  -5  -7  -4  298.87   10.90
  -5  -7  -4  283.17   10.90
  -5  -6  -5   56.39    4.80
  -5  -6  -5   52.49    3.30
  -5  -5  -6   -1.90    2.80
  -5  -4  -7    2.00    4.00
  -5  -3  -8    7.70    5.30
  -5  -2  -9    3.50    6.10
  -4 -17   5    0.90    8.80
   4  16  -4   11.30    4.60
  -4 -16   4   16.40    8.70
   4  15  -3   44.50    6.50
  -4 -15   3   50.89    9.90
   4  14  -2    5.40    3.50
  -4 -14   2    5.50    5.30
   4  13  -1   11.10    3.90
  -4 -13   1    6.20    4.70
  -4 -13   1    9.10    3.00
   4  12   0  245.18   12.30
  -4 -12   0  244.28   11.40
  -4 -12   0  240.98   12.40
   4  11   1  304.47   13.50
  -4 -11  -1  301.47   12.50
  -4 -11  -1  305.57   12.90
   4  10   2   13.30    3.00
  -4 -10  -2    0.50    1.90
  -4 -10  -2   -0.70    1.80
  -4  -9  -3   50.59    4.30
  -4  -9  -3   31.80    2.60
  -4  -8  -4   38.20    3.70
  -4  -8  -4   36.90    2.80
  -4  -7  -5  161.68    7.40
  -4  -7  -5  151.58    7.10
  -4  -7  -5  144.69    6.50
  -4  -6  -6   85.79    6.40
  -4  -6  -6   81.09    4.20
  -4  -6  -6   79.09    3.70
  -4  -5  -7    9.10    4.40
  -3 -18   5   30.90   10.90
  -3 -17   4   33.60   10.80
   3  16  -3   18.90    5.30
  -3 -16   3   15.40    8.00
   3  15  -2  205.68   12.50
  -3 -15   2  211.38   15.30
   3  14  -1  161.28   10.30
  -3 -14   1  153.28   11.50
   3  13   0   -2.70    2.80
  -3 -13   0   -2.10    2.20
  -3 -13   0   -2.00    3.10
   3  12   1   80.29    7.40
  -3 -12  -1   81.59    5.90
  -3 -12  -1   80.39    6.40
  -3 -11  -2  895.91   30.80
  -3 -10  -3  648.04   22.90
  -3  -9  -4   22.00    3.10
  -3  -9  -4   21.30    3.40
  -3  -8  -5    5.30    2.20
  -3  -8  -5    1.90    1.80
  -3  -7  -6    1.40    1.60
  -3  -7  -6    0.10    1.30
  -2 -19   5   13.90   11.10
  -2 -18   4   -6.90    7.30
  -2 -17   3   58.99   11.10
   2  16  -2   -3.50    3.30
  -2 -16   2   -5.60    4.90
   2  15  -1    1.50    3.70
  -2 -15   1    6.50    4.70
   2  14   0  164.98   10.70
  -2 -14   0  152.58    9.80
  -2 -14   0  161.48   10.20
  -2 -13  -1    2.30    2.50
  -2 -13  -1    2.60    2.60
  -2 -12  -2  130.69    7.90
  -2 -11  -3   22.30    3.70
  -2 -11  -3   15.60    3.80
  -2 -10  -4  157.48    8.60
  -2 -10  -4  145.39    7.90
  -2  -9  -5    4.70    2.50
  -2  -9  -5    1.60    2.20
  -2  -8  -6   -2.60    1.80
  -1 -19   4   29.20   11.30
  -1 -18   3   31.60    9.60
  -1 -17   2   18.00    7.20
  -1 -16   1    5.40    5.20
  -1 -15   0    7.30    3.80
  -1 -14  -1   69.89    7.40
  -1 -13  -2   -0.90    3.20
  -1 -12  -3   77.29    7.30
  -1 -11  -4   15.80    3.80
  -1 -10  -5   19.80    3.80
  -1  -9  -6    1.10    2.30
   0 -19   3    0.80   10.90
   0 -16   0  118.89   10.60
   0 -15  -1   68.79    7.90
   0 -14  -2  160.08   10.60
   0 -13  -3  202.08   11.70
   0 -12  -4   38.70    5.60
   0 -11  -5    4.00    2.90
   1 -16  -1  135.89   11.30
   1 -15  -2   92.99    9.30
   1 -14  -3   34.00    6.10
   1 -13  -4   57.29    6.70
   1 -12  -5   53.89    6.80
   2 -17  -1   83.59    9.80
   2 -16  -2    7.20    4.40
   2 -15  -3   18.40    5.40
   2 -14  -4    2.50    3.80
   3 -17  -2   41.70    7.50
   3 -16  -3   -0.50    4.00
   4 -18  -2   14.60   10.20
 -22   2   2   -6.00    6.20
 -22   3   1   -0.60    6.20
 -22   4   0   12.20    6.50
 -22   5  -1   -3.00    5.00
 -21  -1   4    9.50    8.70
 -21   0   3   29.30    9.30
 -21   1   2   66.59   10.90
 -21   2   1   19.10    6.70
 -21   3   0   -5.20    4.20
 -21   4  -1   16.70    5.70
 -21   5  -2   20.60    5.80
 -21   6  -3    2.90    4.40
 -20  -2   4    0.20    6.60
 -20  -1   3   -7.30    6.30
 -20   0   2   -2.50    5.10
 -20   1   1   16.60    6.40
 -20   2   0   18.20    5.50
 -20   3  -1    4.00    4.70
 -20   4  -2   -0.80    4.40
 -20   5  -3   15.10    5.10
 -20   6  -4    5.20    5.10
 -19  -4   5    6.40    8.80
 -19  -3   4   25.80    8.80
 -19  -2   3    8.20    7.20
 -19  -1   2    0.80    5.70
 -19   0   1   -4.10    3.80
 -19   1   0    0.70    4.40
 -19   2  -1   24.30    5.40
 -19   3  -2    3.20    4.20
 -19   4  -3   21.90    5.40
 -19   5  -4    2.90    4.20
 -19   6  -5   13.30    5.90
 -18  -5   5    0.90    8.50
 -18  -4   4    9.20    7.40
 -18  -3   3   28.30    7.90
 -18  -2   2   15.20    6.00
 -18  -1   1   40.70    7.30
 -18   0   0   29.10    5.70
 -18   1  -1   13.10    4.70
 -18   2  -2  100.79    8.70
 -18   3  -3   12.80    4.60
 -18   4  -4    1.10    4.10
 -18   5  -5    2.30    4.70
 -17  -6   5   -0.30    6.70
 -17  -5   4   -6.20    6.40
 -17  -4   3   -0.90    5.40
 -17  -3   2   36.60    7.50
 -17  -2   1   73.99    8.40
 -17  -1   0   -4.00    3.10
 -17   0  -1   27.00    5.00
 -17   1  -2   13.10    4.50
 -17   2  -3   42.50    6.40
 -17   3  -4   24.40    5.60
 -17   4  -5   -0.20    3.90
 -17   5  -6    2.70    4.50
 -16  -8   6    5.20    8.70
 -16  -7   5    2.70    7.50
 -16  -6   4   11.50    8.00
 -16  -5   3   16.80    6.70
 -16  -4   2   21.90    6.50
 -16  -3   1   35.50    6.50
 -16  -2   0  118.49    9.20
 -16  -1  -1  130.89    8.60
 -16   0  -2    3.10    3.50
 -16   1  -3    2.10    3.50
 -16   2  -4   -1.10    4.00
 -16   3  -5   -1.30    4.30
 -16   4  -6   -1.90    4.90
 -15  -9   6   -7.30    8.50
 -15  -8   5    2.40    6.90
 -15  -7   4    0.30    6.70
 -15  -6   3   10.70    6.70
 -15  -5   2   -0.90    5.00
 -15  -4   1    8.30    4.70
 -15  -3   0    1.10    2.90
 -15  -2  -1   20.40    4.10
 -15  -1  -2   78.79    6.80
 -15   0  -3   15.70    4.40
 -15   1  -4   20.50    4.80
 -15   2  -5    1.00    4.50
 -15   3  -6   -4.00    3.80
 -15   4  -7   -0.70    5.10
 -14 -10   6   -4.30    8.70
 -14  -9   5   -0.50    6.80
 -14  -8   4   -1.70    5.80
 -14  -7   3    9.10    5.70
 -14  -6   2   32.70    6.90
 -14  -5   1   22.50    5.20
 -14  -4   0    4.10    3.60
 -14  -3  -1   19.30    3.70
 -14  -2  -2   -0.40    2.30
 -14  -1  -3   25.60    4.60
 -14   0  -4    1.00    3.20
 -14   1  -5   29.00    5.70
 -14   2  -6   40.20    7.30
 -14   3  -7    0.00    4.90
 -13 -11   6    1.40    7.40
 -13 -10   5    0.40    6.90
  13   9  -4    9.10    4.80
 -13  -9   4    4.20    6.40
  13   8  -3  116.29    8.70
 -13  -8   3  105.19   12.20
  13   7  -2  507.65   20.00
 -13  -7   2  462.15   22.40
  13   6  -1  201.68   12.40
 -13  -6   1  187.38   11.90
 -13  -5   0    8.10    3.50
 -13  -4  -1   14.20    3.50
 -13  -3  -2  280.57   12.40
 -13  -2  -3   59.39    5.90
 -13  -1  -4   57.79    6.50
 -13   0  -5   53.79    7.10
 -13   1  -6    3.20    4.40
 -13   2  -7   23.50    6.10
 -13   3  -8    8.20    5.60
 -12 -12   6   -7.10    7.30
 -12 -11   5   16.50    9.50
  12  10  -4    4.50    3.20
 -12 -10   4   -0.10    5.70
  12   9  -3    0.10    2.90
 -12  -9   3   -2.60    5.50
  12   8  -2    3.20    2.70
 -12  -8   2    2.60    4.90
  12   7  -1  382.36   15.90
 -12  -7   1  380.16   17.70
 -12  -7   1  372.16   16.50
  12   6   0  774.42   26.80
 -12  -6   0  721.33   27.20
 -12  -6   0  746.23   27.60
 -12  -5  -1   65.89    5.90
 -12  -5  -1   66.89    5.50
 -12  -4  -2    4.10    2.50
 -12  -4  -2    5.60    2.50
 -12  -3  -3  146.69    8.10
 -12  -2  -4   75.89    6.80
 -12  -1  -5   44.80    6.10
 -12   0  -6   54.49    7.50
 -12   1  -7    6.70    5.10
 -12   2  -8    2.00    5.00
 -11 -13   6   -2.00    8.80
 -11 -12   5    7.30    8.60
  11  11  -4  185.98   11.20
 -11 -11   4  178.88   16.90
  11  10  -3  111.69    8.30
 -11 -10   3   91.09   12.10
  11   9  -2   31.90    4.60
 -11  -9   2   27.10    6.30
  11   8  -1  273.27   12.60
 -11  -8   1  287.97   13.30
 -11  -8   1  262.07   14.60
  11   7   0   -1.70    2.20
 -11  -7   0    0.30    2.50
 -11  -7   0   -4.50    2.90
  11   6   1  410.66   15.80
 -11  -6  -1  402.26   16.20
 -11  -6  -1  393.96   15.90
 -11  -5  -2   53.59    4.80
 -11  -5  -2   48.30    5.10
 -11  -4  -3   98.69    6.50
 -11  -4  -3   97.09    6.40
 -11  -3  -4    9.70    2.70
 -11  -3  -4    2.60    2.90
 -11  -2  -5   53.79    6.50
 -11  -1  -6   11.30    4.70
 -11   0  -7    0.70    4.50
 -11   1  -8   -2.00    4.60
 -10 -14   6   -7.40    8.20
 -10 -13   5   13.20    8.50
  10  12  -4   20.30    5.00
 -10 -12   4   26.30    8.90
  10  11  -3   56.79    6.30
 -10 -11   3   64.29   10.50
  10  10  -2   77.29    6.70
 -10 -10   2   73.59    9.40
  10   9  -1    9.50    3.10
 -10  -9   1   19.70    5.40
 -10  -9   1   11.20    3.80
  10   8   0    8.60    3.10
 -10  -8   0    9.30    3.50
 -10  -8   0    4.30    3.00
  10   7   1   -1.20    2.30
 -10  -7  -1    2.10    2.70
 -10  -7  -1   -3.10    2.30
  10   6   2  248.98   10.80
 -10  -6  -2  252.67   10.60
 -10  -6  -2  262.27   11.40
  10   5   3  226.88   10.10
 -10  -5  -3  239.18   10.20
 -10  -5  -3  230.88   10.20
 -10  -4  -4    5.90    2.20
 -10  -4  -4    5.80    3.00
 -10  -3  -5    0.90    1.90
 -10  -3  -5   -4.40    2.70
 -10  -2  -6   46.60    6.50
 -10  -2  -6   44.60    3.60
 -10  -1  -7   13.70    5.00
 -10   0  -8    0.20    4.70
  -9 -15   6   -2.70    8.60
  -9 -14   5    5.40    7.80
   9  13  -4   -2.00    3.30
  -9 -13   4  -14.30    5.80
   9  12  -3   15.60    4.10
  -9 -12   3   12.40    6.90
   9  11  -2   10.80    3.20
  -9 -11   2   14.90    5.70
   9  10  -1  264.37   12.30
  -9 -10   1  241.38   13.90
  -9 -10   1  251.87   12.20
   9   9   0    4.50    2.60
  -9  -9   0    2.50    2.70
  -9  -9   0    9.10    3.90
   9   8   1  177.08    9.30
  -9  -8  -1  198.68    9.50
  -9  -8  -1  176.48    9.20
   9   7   2   87.19    6.10
  -9  -7  -2   84.09    5.90
  -9  -7  -2   91.89    5.50
   9   6   3  116.59    6.20
  -9  -6  -3  115.09    6.20
  -9  -6  -3  122.49    6.70
  -9  -5  -4  310.47   12.10
  -9  -5  -4  311.97   12.80
  -9  -4  -5   34.50    3.50
  -9  -4  -5   36.90    4.90
  -9  -3  -6    0.90    3.40
  -9  -3  -6   -0.80    1.20
  -9  -2  -7   19.60    5.50
  -9  -1  -8   13.50    5.60
  -9   0  -9    6.90    5.50
  -8 -16   6   -3.10    9.50
  -8 -15   5   -2.30    8.10
   8  14  -4   22.50    5.00
  -8 -14   4   12.30    8.00
   8  13  -3   48.00    6.50
  -8 -13   3   39.10    9.00
   8  12  -2   17.50    3.90
  -8 -12   2   13.60    5.40
   8  11  -1  182.38   10.20
  -8 -11   1  180.18   12.10
  -8 -11   1  190.88   10.10
   8  10   0 1376.66   46.50
  -8 -10   0 1373.46   46.30
  -8 -10   0 1451.15   47.60
   8   9   1  591.94   21.70
  -8  -9  -1  593.04   21.50
  -8  -9  -1  574.44   21.60
   8   8   2   28.60    4.00
  -8  -8  -2   25.90    3.70
  -8  -8  -2   29.90    3.60
   8   7   3   16.00    2.90
  -8  -7  -3   16.10    2.60
   8   6   4    1.70    1.10
  -8  -6  -4    2.60    1.80
  -8  -6  -4   -1.20    2.00
  -8  -5  -5   39.20    4.80
  -8  -5  -5   41.20    3.40
  -8  -4  -6    9.20    3.70
  -8  -3  -7    2.50    4.00
  -8  -2  -8    5.80    4.70
  -8  -1  -9    6.30    5.50
  -7 -16   5   22.30   10.50
   7  15  -4    5.00    4.50
  -7 -15   4    5.40    7.60
   7  14  -3   -3.00    3.10
  -7 -14   3    0.80    5.60
   7  13  -2    7.50    3.30
  -7 -13   2    3.50    5.30
   7  12  -1    8.90    3.40
  -7 -12   1    5.70    4.20
  -7 -12   1    3.90    2.80
   7  11   0    2.80    2.90
  -7 -11   0    1.50    2.30
  -7 -11   0   -5.70    3.00
   7  10   1  573.34   21.40
  -7 -10  -1  559.34   20.90
  -7 -10  -1  579.54   21.30
   7   9   2  959.20   32.30
  -7  -9  -2  940.21   31.90
  -7  -9  -2  943.31   31.20
   7   8   3  393.76   15.00
  -7  -8  -3  395.76   14.70
  -7  -8  -3  390.96   13.80
  -7  -7  -4   27.80    3.30
  -7  -7  -4   31.80    3.40
  -7  -6  -5    0.90    2.50
  -7  -6  -5    1.30    1.50
  -7  -5  -6   -2.70    2.90
  -7  -4  -7   -0.20    3.70
  -7  -3  -8    2.00    4.40
  -6 -17   5   12.80   10.00
  -6 -16   4   -2.90    7.30
   6  15  -3    0.10    3.20
  -6 -15   3    1.80    6.30
   6  14  -2    4.30    3.80
  -6 -14   2    1.70    5.30
   6  13  -1   33.20    5.20
  -6 -13   1   29.80    6.40
  -6 -13   1   32.10    4.40
   6  12   0   18.60    4.10
  -6 -12   0   25.70    4.10
  -6 -12   0    9.50    4.30
   6  11   1  202.78   10.40
  -6 -11  -1  201.88    9.80
  -6 -11  -1  189.88   10.10
   6  10   2   77.09    6.40
  -6 -10  -2   91.09    5.60
  -6 -10  -2   84.89    6.00
   6   9   3   79.19    5.80
  -6  -9  -3   75.39    5.20
  -6  -9  -3   78.89    4.30
  -6  -8  -4  156.98    6.70
  -6  -8  -4  151.38    7.10
  -6  -7  -5    4.70    2.40
  -6  -7  -5   11.10    2.10
  -6  -6  -6   48.20    3.40
  -6  -6  -6   43.80    2.90
  -6  -6  -6   47.40    5.40
  -6  -5  -7    3.50    3.80
  -5 -18   5   -8.50    8.30
  -5 -17   4   -5.70    7.10
  -5 -16   3   -0.40    6.20
   5  15  -2  110.69   10.30
  -5 -15   2  100.69   11.50
   5  14  -1   93.79    8.30
  -5 -14   1   99.59    9.60
   5  13   0   -0.60    2.80
  -5 -13   0    2.60    2.60
  -5 -13   0    0.10    3.50
   5  12   1    3.20    2.70
  -5 -12  -1    2.60    2.90
  -5 -12  -1    5.60    2.50
   5  11   2    0.40    2.80
  -5 -11  -2   -0.10    2.10
  -5 -11  -2   -0.10    2.00
  -5 -10  -3    4.10    2.10
  -5 -10  -3    0.30    1.60
  -5  -9  -4   20.50    2.30
  -5  -9  -4   18.40    2.90
  -5  -8  -5   53.69    3.90
  -5  -7  -6   -0.60    1.60
  -5  -7  -6    0.70    1.20
  -4 -19   5    8.50    9.50
  -4 -18   4    4.90    8.30
  -4 -17   3    0.90    6.60
  -4 -16   2    1.70    5.70
  -4 -15   1  168.48   12.50
  -4 -14   0  337.37   15.90
  -4 -13  -1    4.30    3.10
  -4 -11  -3   68.29    7.90
  -4  -9  -5   48.90    4.80
  -4  -8  -6   78.69    5.20
  -3 -19   4   25.60   10.80
  -3 -18   3    1.10    7.50
  -3 -17   2    7.90    6.40
  -3 -16   1   61.59    8.80
  -3 -15   0   -2.30    5.50
  -3 -11  -4   -2.20    2.30
  -3 -10  -5   23.10    3.90
  -3  -9  -6    1.50    2.30
  -2 -19   3   33.20   15.10
  -2 -13  -3   94.29    7.90
  -2 -12  -4    1.80    2.80
  -2 -11  -5    7.60    3.30
  -1 -16  -1    1.20    3.60
  -1 -15  -2   -1.60    3.00
  -1 -14  -3   90.39    8.40
  -1 -13  -4  217.28   12.20
  -1 -12  -5   48.30    6.60
   0 -17  -1   42.60    7.50
   0 -16  -2    7.50    4.70
   0 -15  -3    6.10    4.60
   0 -14  -4   -0.60    3.20
   1 -17  -2  201.58   14.00
   1 -16  -3   59.69    8.00
   2 -18  -2    9.00    5.10
 -22   0   2    5.10    7.30
 -22   1   1   19.90    7.80
 -22   2   0   39.30    7.80
 -22   3  -1    2.10    4.90
 -22   4  -2    9.40    5.20
 -21  -2   3    2.40    6.70
 -21  -1   2   21.60    8.30
 -21   0   1   49.99    9.20
 -21   1   0   -2.20    5.10
 -21   2  -1   22.50    6.50
 -21   3  -2   -0.80    4.40
 -21   4  -3    1.70    4.50
 -20  -4   4    1.00    6.80
 -20  -3   3   11.70    7.40
 -20  -2   2    6.30    6.80
 -20  -1   1   11.50    5.80
 -20   0   0   25.70    6.80
 -20   1  -1   12.70    5.60
 -20   2  -2    7.80    4.50
 -20   3  -3    3.90    4.30
 -20   4  -4    8.20    4.60
 -19  -5   4    6.80    8.30
 -19  -4   3   18.80    8.70
 -19  -3   2    7.90    6.90
 -19  -2   1   35.40    7.70
 -19  -1   0   -5.20    3.40
 -19   0  -1    1.20    3.70
 -19   1  -2    5.90    4.50
 -19   2  -3   17.70    4.90
 -19   3  -4   28.10    6.40
 -19   4  -5   -0.20    4.80
 -18  -7   5   -4.80    7.10
 -18  -6   4   -1.70    6.50
 -18  -5   3   15.10    7.70
 -18  -4   2   15.50    6.50
 -18  -3   1    9.10    5.70
 -18  -2   0  124.19   10.00
 -18  -1  -1   29.40    5.60
 -18   0  -2   24.40    5.10
 -18   1  -3   20.60    5.50
 -18   2  -4   -0.50    3.70
 -18   3  -5   27.50    6.60
 -17  -8   5    4.10    7.90
 -17  -7   4    0.80    6.80
 -17  -6   3   20.40    7.70
 -17  -5   2   64.69   10.00
 -17  -4   1    0.10    4.30
 -17  -3   0    3.20    3.90
 -17  -2  -1   88.59    7.80
 -17  -1  -2  173.18   10.70
 -17   0  -3   85.49    7.70
 -17   1  -4   28.70    6.00
 -17   2  -5    5.20    4.80
 -17   3  -6   -3.90    4.00
 -16  -9   5   11.70    9.50
 -16  -8   4   11.70    8.40
 -16  -7   3   14.00    7.10
 -16  -6   2   -4.70    4.90
 -16  -5   1    9.40    4.90
 -16  -4   0    3.50    4.10
 -16  -3  -1   45.70    6.20
 -16  -2  -2    1.10    2.90
 -16  -1  -3   53.19    6.00
 -16   0  -4   40.50    6.00
 -16   1  -5    8.90    4.50
 -16   2  -6    4.70    4.60
 -16   3  -7   -2.00    4.20
 -15 -10   5    1.80    7.90
 -15  -9   4   17.50    7.90
 -15  -8   3   14.60    6.80
 -15  -7   2   -2.20    4.90
 -15  -6   1    7.10    4.60
 -15  -5   0   -5.50    2.90
 -15  -4  -1    9.50    3.50
 -15  -3  -2   11.00    3.30
 -15  -2  -3   16.40    3.90
 -15  -1  -4    5.00    3.90
 -15   0  -5   25.60    5.30
 -15   1  -6   -1.00    4.50
 -15   2  -7    0.50    4.30
 -14 -11   5    9.00    9.20
 -14 -10   4   -2.80    6.30
 -14  -9   3    8.90    6.20
 -14  -8   2   -1.80    4.60
 -14  -7   1  147.19   11.00
 -14  -6   0   87.19    7.80
 -14  -5  -1   30.30    4.90
 -14  -4  -2   29.00    4.20
 -14  -3  -3   30.30    4.70
 -14  -2  -4    1.30    3.10
 -14  -1  -5    0.70    4.10
 -14   0  -6   38.20    6.80
 -14   1  -7   16.40    6.00
 -13 -12   5    7.80    8.90
 -13 -11   4   38.70   10.70
 -13 -10   3   14.00    6.60
 -13  -9   2   59.99    9.20
 -13  -8   1  187.68   12.80
 -13  -7   0    3.10    3.40
 -13  -6  -1  202.18   10.80
 -13  -5  -2   53.59    5.00
 -13  -4  -3    1.20    2.30
 -13  -3  -4   22.40    4.40
 -13  -2  -5    9.60    3.80
 -13  -1  -6   -1.40    4.00
 -13   0  -7   15.00    5.30
 -13   1  -8    9.50    5.80
 -12 -13   5    0.80    8.40
 -12 -12   4   -3.60    6.80
 -12 -11   3  111.39   13.70
 -12 -10   2  124.79   12.10
 -12  -9   1   82.39    9.20
 -12  -8   0  665.63   26.00
 -12  -7  -1  370.46   15.70
 -12  -6  -2   31.50    4.20
 -12  -5  -3   26.30    3.90
 -12  -4  -4    7.70    3.20
 -12  -3  -5    0.90    2.90
 -12  -2  -6    4.70    4.20
 -12  -1  -7    5.70    4.80
 -12   0  -8   -0.60    4.80
 -11 -14   5    1.40    8.50
 -11 -13   4    5.90    8.10
 -11 -12   3   61.89   10.30
 -11 -11   2   -2.00    5.00
 -11 -10   1    6.40    4.20
 -11  -9   0   -3.10    3.20
 -11  -8  -1  267.67   12.30
 -11  -7  -2  374.86   14.80
 -11  -6  -3    1.80    2.40
 -11  -5  -4   89.29    6.30
 -11  -4  -5    3.60    3.10
 -11  -3  -6    6.20    4.10
 -11  -2  -7   -2.30    3.90
 -11  -1  -8    1.80    4.50
 -10 -15   5    3.80    8.90
 -10 -14   4   26.80    8.70
 -10 -13   3   13.20    7.60
 -10 -12   2   24.60    7.20
 -10 -11   1    5.60    4.50
 -10 -10   0   52.79    6.60
 -10  -9  -1   11.70    3.70
 -10  -8  -2   37.50    4.30
 -10  -7  -3  260.17   10.80
 -10  -6  -4   25.10    3.70
 -10  -5  -5   85.39    6.60
 -10  -4  -6   57.89    6.70
 -10  -3  -7   -1.50    3.60
 -10  -2  -8    0.50    4.30
  -9 -16   5    2.80    8.90
  -9 -15   4    5.00    7.10
  -9 -14   3   34.80    8.90
  -9 -13   2  120.49   12.00
  -9 -12   1   22.20    5.90
  -9 -11   0   -0.40    3.10
  -9 -10  -1  264.77   12.60
  -9  -9  -2  360.26   14.20
  -9  -8  -3  134.39    6.70
  -9  -7  -4  259.07   10.80
  -9  -6  -5  103.09    6.70
  -9  -5  -6   -2.30    2.90
  -9  -5  -6   -0.10    1.50
  -9  -4  -7   15.90    4.80
  -9  -3  -8   -0.60    4.00
  -8 -17   5    3.00    9.20
  -8 -16   4   -7.60    7.00
  -8 -15   3   14.80    6.90
  -8 -14   2   -0.90    4.90
  -8 -13   1   29.70    6.50
  -8 -12   0    9.90    3.90
  -8 -11  -1  198.18   10.50
  -8 -10  -2    0.20    2.50
  -8  -9  -3  125.99    6.30
  -8  -8  -4  109.69    5.80
  -8  -7  -5   92.29    6.00
  -8  -6  -6   47.70    5.40
  -8  -6  -6   48.10    3.60
  -8  -5  -7    7.80    4.10
  -7 -18   5   16.00    9.50
  -7 -17   4   45.40   11.60
  -7 -16   3    1.20    6.60
  -7 -15   2   17.00    6.70
  -7 -14   1   33.10    6.90
  -7 -13   0    3.00    3.50
  -7 -11  -2  228.18   10.50
  -7 -10  -3  232.68    9.50
  -7  -9  -4    0.00    1.60
  -7  -8  -5   20.00    3.40
  -7  -7  -6    5.80    2.00
  -7  -7  -6    8.90    3.00
  -6 -18   4    8.90    8.60
  -6 -17   3   20.90    8.50
  -6 -16   2   10.70    6.20
  -6 -15   1   24.60    6.50
  -6 -14   0   55.19    7.00
  -6 -13  -1   25.50    4.60
  -6 -12  -2   63.49    8.10
  -6  -8  -6   10.20    2.70
  -5 -19   4    0.50    8.20
  -5 -18   3   26.50    9.20
  -5 -17   2    0.70    5.60
  -5 -16   1   43.60    7.70
  -5 -15   0    1.80    4.50
  -5 -10  -5    3.50    2.40
  -4 -11  -5    3.30    2.70
  -3 -14  -3   15.80    4.30
  -3 -13  -4   41.50    5.60
  -2 -17  -1    9.30    4.40
  -2 -16  -2    1.20    3.60
  -2 -15  -3   38.00    6.00
  -2 -14  -4    2.00    3.50
  -1 -18  -1    8.20    5.00
  -1 -17  -2   13.50    5.10
  -1 -16  -3   16.00    5.10
   0 -18  -2   22.40    6.60
 -23   1   0   -0.30    6.10
 -22  -2   2   -2.20    7.00
 -22  -1   1   15.10    7.80
 -22   0   0   78.89   10.50
 -22   1  -1   31.10    7.80
 -22   2  -2   -1.10    4.20
 -21  -4   3    5.80    8.10
 -21  -3   2    5.70    6.50
 -21  -2   1   -0.40    6.70
 -21  -1   0   -3.20    4.60
 -21   0  -1   39.50    7.40
 -21   1  -2   57.79    8.30
 -21   2  -3    7.80    4.70
 -20  -6   4   -4.20    7.70
 -20  -5   3   12.10    7.70
 -20  -4   2   13.90    7.20
 -20  -3   1    2.50    5.60
 -20  -2   0    0.20    4.60
 -20  -1  -1    5.20    5.10
 -20   0  -2   -3.00    4.40
 -20   1  -3   36.20    6.50
 -20   2  -4    6.00    5.10
 -19  -7   4   -0.90    6.70
 -19  -6   3   -2.80    6.00
 -19  -5   2   11.10    7.50
 -19  -4   1    1.00    5.10
 -19  -3   0   -0.80    4.10
 -19  -2  -1   25.00    5.80
 -19  -1  -2   -1.30    3.60
 -19   0  -3   -2.60    3.40
 -19   1  -4   30.60    6.20
 -19   2  -5   14.50    5.20
 -18  -8   4    1.00    7.10
 -18  -7   3   16.50    8.30
 -18  -6   2   -1.00    5.40
 -18  -5   1   33.80    7.70
 -18  -4   0   -7.90    3.40
 -18  -3  -1   12.50    4.60
 -18  -2  -2   12.20    4.80
 -18  -1  -3    8.10    4.10
 -18   0  -4    3.20    3.70
 -18   1  -5   13.30    4.90
 -18   2  -6   19.90    5.80
 -17 -10   5    3.80    8.00
 -17  -9   4   18.00    9.70
 -17  -8   3   16.60    7.80
 -17  -7   2  103.49   11.60
 -17  -6   1   52.59    8.30
 -17  -5   0    2.50    4.00
 -17  -4  -1   -2.10    3.30
 -17  -3  -2   30.50    5.20
 -17  -2  -3    9.20    3.90
 -17  -1  -4   -3.80    3.50
 -17   0  -5    0.60    3.90
 -17   1  -6    1.10    4.70
 -16 -11   5   -3.10    8.00
 -16 -10   4   -5.50    7.50
 -16  -9   3    6.20    6.70
 -16  -8   2   21.40    7.60
 -16  -7   1   27.30    6.90
 -16  -6   0   52.09    7.50
 -16  -5  -1   14.60    4.70
 -16  -4  -2   20.60    4.70
 -16  -3  -3    3.10    3.10
 -16  -2  -4   24.00    4.80
 -16  -1  -5   13.00    4.80
 -16   0  -6   -2.00    3.50
 -16   1  -7   -4.80    4.30
 -15 -12   5   -4.50    8.00
 -15 -11   4    5.30    7.30
 -15 -10   3   38.40    9.50
 -15  -9   2    4.30    5.70
 -15  -8   1    7.90    4.60
 -15  -7   0   -8.40    3.40
 -15  -6  -1    8.50    4.30
 -15  -5  -2    0.60    2.90
 -15  -4  -3   65.89    6.50
 -15  -3  -4   20.80    4.60
 -15  -2  -5    0.00    3.30
 -15  -1  -6    5.70    4.10
 -15   0  -7    1.80    4.70
 -14 -13   5   -4.10    7.60
 -14 -12   4   42.00   11.30
 -14 -11   3   29.00    9.40
 -14 -10   2    6.20    5.40
 -14  -9   1   14.00    5.80
 -14  -8   0  139.69   10.70
 -14  -7  -1  194.98   11.40
 -14  -6  -2   41.20    5.40
 -14  -5  -3   14.50    3.70
 -14  -4  -4    1.60    3.20
 -14  -3  -5   13.60    4.50
 -14  -2  -6   -0.20    4.00
 -14  -1  -7    6.00    4.90
 -13 -14   5    3.90    7.90
 -13 -13   4   -2.40    7.30
 -13 -12   3   -0.70    6.30
 -13 -11   2   42.80    9.00
 -13 -10   1    7.40    4.70
 -13  -9   0    0.60    4.10
 -13  -8  -1  176.88   10.60
 -13  -7  -2  505.95   19.70
 -13  -6  -3   75.09    6.10
 -13  -5  -4   24.50    4.10
 -13  -4  -5   21.30    4.60
 -13  -3  -6   -0.30    3.60
 -13  -2  -7   -1.20    4.10
 -13  -1  -8   -1.00    4.50
 -12 -15   5    1.40    8.00
 -12 -14   4    4.60    7.30
 -12 -13   3    2.70    6.00
 -12 -12   2   63.39   10.30
 -12 -11   1    9.40    5.20
 -12 -10   0   14.30    4.90
 -12  -9  -1   89.49    7.70
 -12  -7  -3  154.88    8.30
 -12  -6  -4   26.80    4.20
 -12  -5  -5    0.30    3.00
 -12  -4  -6    0.60    3.40
 -12  -3  -7   -1.70    4.00
 -12  -2  -8    0.60    4.40
 -11 -16   5    8.50    9.80
 -11 -15   4   29.40   10.40
 -11 -14   3    4.50    6.90
 -11 -13   2   19.20    6.60
 -11 -12   1    7.40    5.10
 -11 -10  -1    1.30    3.20
 -11  -9  -2   27.90    4.50
 -11  -8  -3   45.50    4.60
 -11  -7  -4   49.70    4.90
 -11  -6  -5   58.49    5.70
 -11  -5  -6    0.00    3.40
 -11  -4  -7    2.00    4.00
 -11  -3  -8   -5.50    3.90
 -10 -17   5    1.30    8.90
 -10 -16   4   -0.20    7.40
 -10 -15   3   36.60   10.20
 -10 -14   2   -3.80    5.60
 -10 -13   1   86.49   10.10
 -10 -12   0   12.80    4.50
 -10 -11  -1    6.50    3.50
 -10 -10  -2   77.89    6.20
 -10  -9  -3   48.20    4.70
 -10  -8  -4    0.00    2.00
 -10  -7  -5   47.30    4.80
 -10  -6  -6  116.99    7.90
 -10  -5  -7   20.00    5.10
  -9 -17   4    5.10    8.50
  -9 -16   3   -1.40    6.90
  -9 -15   2   64.19   10.20
  -9 -14   1  150.98   12.30
  -9 -13   0    2.30    3.90
  -9 -12  -1   24.00    4.70
  -9 -11  -2    8.50    3.20
  -9 -10  -3   10.80    2.90
  -9  -9  -4    1.80    2.00
  -9  -8  -5    0.80    2.20
  -8 -18   4   -2.00    7.90
  -8 -17   3    6.90    7.80
  -8 -16   2    3.40    6.00
  -8 -15   1   47.10    8.10
  -8 -14   0  254.47   14.40
  -8 -13  -1   31.50    5.20
  -8 -12  -2   22.20    4.00
  -7 -19   4    7.30    9.00
  -7 -18   3   28.10    9.70
  -7 -17   2   -0.30    5.70
  -7 -16   1   -3.20    4.50
  -7 -15   0   -2.90    4.00
  -3 -18  -1    4.30    4.50
  -3 -17  -2   15.30    5.00
  -3 -16  -3   24.90    9.20
  -2 -18  -2   91.69   11.00
 -23  -1   0    2.80    6.70
 -23   0  -1   14.60    7.10
 -22  -4   2    4.50    7.60
 -22  -3   1    6.60    7.30
 -22  -2   0    3.30    5.90
 -22  -1  -1   16.40    6.60
 -22   0  -2    5.80    5.00
 -22   1  -3    8.50    5.40
 -21  -6   3    9.50    7.60
 -21  -5   2   17.40    8.80
 -21  -4   1   16.00    7.00
 -21  -3   0   -3.60    5.60
 -21  -2  -1    0.70    4.90
 -21  -1  -2   20.70    6.60
 -21   0  -3   13.90    5.90
 -21   1  -4    3.70    4.50
 -20  -7   3   12.50    8.80
 -20  -6   2   17.10    7.50
 -20  -5   1   -0.80    5.40
 -20  -4   0    0.40    4.80
 -20  -3  -1   -2.40    4.40
 -20  -2  -2   16.30    5.80
 -20  -1  -3    4.00    4.90
 -20   0  -4   21.40    6.00
 -19  -9   4    1.40    7.10
 -19  -8   3    4.30    8.00
 -19  -7   2   12.60    7.30
 -19  -6   1   29.70    7.90
 -19  -5   0    3.40    4.80
 -19  -4  -1    3.10    4.50
 -19  -3  -2    0.60    3.90
 -19  -2  -3    7.50    4.10
 -19  -1  -4   -2.00    3.50
 -19   0  -5    7.80    4.50
 -18 -10   4    2.10    8.50
 -18  -9   3    4.80    7.70
 -18  -8   2    1.60    6.10
 -18  -7   1   71.19   10.40
 -18  -6   0  140.09   11.50
 -18  -5  -1   32.60    6.30
 -18  -4  -2   12.40    4.40
 -18  -3  -3   22.60    5.00
 -18  -2  -4   -0.90    3.90
 -18  -1  -5    2.00    4.40
 -18   0  -6    9.30    5.20
 -17 -11   4   12.80    9.70
 -17 -10   3   -0.80    7.50
 -17  -9   2    5.30    6.20
 -17  -8   1   28.10    7.80
 -17  -7   0   -2.50    4.00
 -17  -6  -1   55.99    7.20
 -17  -5  -2   61.59    6.90
 -17  -4  -3    4.30    3.40
 -17  -3  -4    0.50    3.30
 -17  -2  -5    1.30    4.10
 -17  -1  -6   -2.90    3.80
 -16 -12   4   -5.10    7.60
 -16 -11   3    5.40    6.80
 -16 -10   2   28.10    8.80
 -16  -9   1   23.10    6.70
 -16  -8   0   30.10    6.70
 -16  -7  -1   22.60    5.20
 -16  -6  -2    0.60    3.70
 -16  -5  -3   19.60    4.60
 -16  -4  -4   -1.70    3.30
 -16  -3  -5   -0.80    3.70
 -16  -2  -6   -0.20    4.20
 -16  -1  -7    2.20    4.60
 -15 -13   4    0.20    7.00
 -15 -12   3   26.80    9.50
 -15 -11   2   63.09   10.70
 -15 -10   1    2.40    4.80
 -15  -9   0   -4.00    4.10
 -15  -8  -1    4.00    3.80
 -15  -7  -2    1.40    3.60
 -15  -6  -3   11.00    3.80
 -15  -5  -4   36.20    5.30
 -15  -4  -5    8.40    3.90
 -15  -3  -6    0.40    3.90
 -15  -2  -7    0.20    4.20
 -14 -14   4    7.70    8.60
 -14 -13   3   10.20    8.30
 -14 -12   2   -6.10    5.70
 -14 -11   1   50.79    8.80
 -14 -10   0    2.50    4.70
 -14  -9  -1    5.80    4.40
 -14  -8  -2    0.10    3.20
 -14  -7  -3   17.30    3.90
 -14  -6  -4   14.30    3.80
 -14  -5  -5   27.20    4.90
 -14  -4  -6   43.00    6.30
 -14  -3  -7   -2.00    3.70
 -13 -15   4   14.40    9.20
 -13 -14   3    3.80    7.40
 -13 -13   2   26.80    8.20
 -13 -12   1   52.99    8.50
 -13 -11   0    2.50    4.40
 -13 -10  -1   10.20    4.50
 -13  -9  -2   70.79    6.90
 -13  -8  -3   99.29    7.40
 -13  -7  -4    1.40    2.80
 -13  -6  -5    2.40    3.20
 -13  -5  -6    1.90    3.60
 -13  -4  -7    9.20    4.60
 -13  -3  -8    1.20    6.60
 -12 -16   4   -0.80    8.40
 -12 -15   3   16.90    8.40
 -12 -14   2    4.80    6.50
 -12 -13   1   -1.60    5.10
 -12 -12   0   14.50    5.40
 -12 -11  -1    8.00    4.50
 -12 -10  -2  144.69    9.20
 -12  -9  -3    3.70    3.00
 -12  -8  -4   56.29    5.50
 -12  -7  -5   11.10    3.40
 -12  -6  -6    0.70    3.40
 -12  -5  -7    5.60    5.80
 -11 -17   4   14.60    9.70
 -11 -16   3   14.20    8.10
 -11 -15   2   12.60    7.10
 -11 -14   1   30.10    7.70
 -11 -13   0   -0.50    4.30
 -11 -12  -1   14.20    4.50
 -11 -11  -2   -1.30    3.00
 -11 -10  -3   88.09    6.40
 -11  -9  -4   55.69    5.00
 -11  -8  -5   -3.00    2.50
 -10 -18   4   21.40   10.30
 -10 -17   3   10.30    7.90
 -10 -16   2   10.90    7.00
 -10 -15   1   39.40    8.10
 -10 -14   0  240.18   14.80
 -10 -13  -1   83.89    8.20
 -10 -12  -2   28.50    4.80
  -9 -18   3    6.90    8.40
  -9 -17   2   15.00    7.50
  -9 -16   1    2.80    5.60
  -9 -15   0    2.70    4.50
 -22  -5   1   22.70    8.90
 -22  -4   0   49.50   10.00
 -22  -3  -1    9.50    6.70
 -22  -2  -2    1.90    5.90
 -22  -1  -3    3.80    5.30
 -21  -7   2    0.40    7.80
 -21  -6   1    6.40    7.50
 -21  -5   0   -4.00    5.30
 -21  -4  -1   20.70    7.10
 -21  -3  -2    7.80    5.90
 -21  -2  -3    2.80    4.60
 -21  -1  -4    3.60    4.60
 -20  -9   3    1.90    8.20
 -20  -8   2   12.90    7.60
 -20  -7   1    1.50    6.20
 -20  -6   0    4.70    6.70
 -20  -5  -1   -4.60    4.50
 -20  -4  -2   11.70    5.70
 -20  -3  -3   20.30    5.50
 -20  -2  -4    2.90    4.10
 -19 -10   3   10.00    8.80
 -19  -9   2   -3.80    6.80
 -19  -8   1    9.00    7.20
 -19  -7   0   -4.80    5.40
 -19  -6  -1   32.50    7.00
 -19  -5  -2   11.60    5.30
 -19  -4  -3   23.10    5.80
 -19  -3  -4   34.90    6.50
 -19  -2  -5   -0.20    3.80
 -18 -11   3   23.00    9.90
 -18 -10   2   -3.10    6.50
 -18  -9   1    1.20    5.70
 -18  -8   0   70.09    9.80
 -18  -7  -1   57.19    8.50
 -18  -6  -2    0.00    3.70
 -18  -5  -3    6.90    4.50
 -18  -4  -4   10.10    4.40
 -18  -3  -5   11.00    4.90
 -18  -2  -6    2.30    4.40
 -17 -12   3    1.70    7.90
 -17 -11   2   -3.40    6.50
 -17 -10   1   -1.10    5.30
 -17  -9   0   -2.90    5.10
 -17  -8  -1   27.70    6.50
 -17  -7  -2  111.89    9.10
 -17  -6  -3   26.50    5.60
 -17  -5  -4   -0.10    3.10
 -17  -4  -5    2.10    4.10
 -17  -3  -6   -2.10    3.60
 -16 -13   3    3.30    7.90
 -16 -12   2   -2.10    5.90
 -16 -11   1   19.70    7.00
 -16 -10   0   26.70    7.10
 -16  -9  -1   31.50    6.70
 -16  -8  -2   22.20    5.20
 -16  -7  -3    8.10    4.00
 -16  -6  -4   11.80    4.20
 -16  -5  -5   -1.70    3.00
 -16  -4  -6   11.30    4.80
 -16  -3  -7    1.20    4.10
 -15 -14   3   -7.00    7.20
 -15 -13   2   29.10    8.50
 -15 -12   1   34.30    8.30
 -15 -11   0    0.90    5.10
 -15 -10  -1   -1.20    4.20
 -15  -9  -2   -0.40    3.70
 -15  -8  -3   10.10    4.10
 -15  -7  -4   -1.30    3.10
 -15  -6  -5    1.60    3.50
 -15  -4  -7    3.70    4.30
 -14 -15   3    0.40    6.80
 -14 -14   2    0.00    6.30
 -14 -13   1   44.80    9.10
 -14 -12   0  111.99   11.20
 -14 -11  -1   33.10    6.80
 -14 -10  -2    0.50    3.70
 -14  -9  -3    9.90    3.90
 -14  -8  -4   13.90    3.80
 -14  -7  -5   -1.10    3.10
 -14  -6  -6    3.30    3.50
 -13 -16   3    7.30    8.20
 -13 -15   2    9.30    7.10
 -13 -14   1    0.90    5.70
 -13 -13   0   -3.90    4.70
 -13 -12  -1   69.79    8.70
 -13 -11  -2   47.60    6.70
 -13 -10  -3   17.90    4.30
 -13  -9  -4    1.60    3.20
 -13  -8  -5   -0.10    3.30
 -12 -17   3    1.30    8.20
 -12 -16   2    8.20    7.80
 -12 -15   1   -0.30    5.70
 -12 -14   0    4.40    5.30
 -12 -13  -1   -2.00    4.20
 -12 -12  -2   49.40    6.70
 -12 -11  -3   91.39    9.90
 -11 -18   3   31.20   10.50
 -11 -17   2   15.40    7.80
 -11 -16   1    3.00    5.90
 -11 -15   0    0.50    5.20
 -22  -6   0   23.80    8.70
 -22  -5  -1    8.90    6.20
 -22  -4  -2    6.40    6.20
 -21  -8   1    3.20    7.40
 -21  -7   0    6.60    7.00
 -21  -6  -1    5.90    6.20
 -21  -5  -2   11.80    6.20
 -21  -4  -3   -2.60    4.80
 -20 -10   2    8.10    7.90
 -20  -9   1    7.70    6.60
 -20  -8   0   -0.30    6.20
 -20  -7  -1    4.50    5.20
 -20  -6  -2    3.20    5.40
 -20  -5  -3   -0.40    4.80
 -20  -4  -4    1.10    4.10
 -19 -10   1   17.80    8.70
 -19  -9   0    9.20    6.80
 -19  -8  -1    6.70    6.40
 -19  -7  -2   19.40    6.40
 -19  -6  -3    3.20    4.30
 -19  -5  -4    3.90    4.60
 -19  -4  -5    6.70    4.60
 -18 -12   2   -9.20    6.90
 -18 -11   1   14.90    7.90
 -18 -10   0    4.80    5.80
 -18  -9  -1    1.20    5.60
 -18  -8  -2   -2.00    4.10
 -18  -7  -3   27.00    6.30
 -18  -6  -4   11.00    4.80
 -18  -5  -5    4.90    4.40
 -17 -13   2   -5.20    7.10
 -17 -12   1   -3.70    6.10
 -17 -11   0   -8.40    5.20
 -17 -10  -1    6.00    5.60
 -17  -9  -2    0.40    4.80
 -17  -8  -3   28.60    5.90
 -17  -7  -4    0.60    3.80
 -17  -6  -5    4.90    4.00
 -17  -5  -6   -0.60    4.00
 -16 -14   2    1.40    6.40
 -16 -13   1   -3.10    6.10
 -16 -12   0   23.90    7.60
 -16 -11  -1   27.60    7.00
 -16 -10  -2   28.90    6.30
 -16  -9  -3    7.50    4.60
 -16  -8  -4    8.00    4.10
 -16  -7  -5    9.30    4.20
 -16  -6  -6   -2.40    3.80
 -15 -15   2    3.70    7.60
 -15 -14   1    8.70    6.50
 -15 -13   0    2.10    5.20
 -15 -12  -1   25.80    6.80
 -15 -11  -2   64.29    8.30
 -15 -10  -3   47.00    6.90
 -15  -9  -4   25.20    5.10
 -14 -16   2   -3.60    6.80
 -14 -15   1   -0.80    5.80
 -14 -14   0   31.20    7.70
 -14 -13  -1   42.60    7.80
 -14 -12  -2    3.20    4.10
 -13 -17   2   -5.70    6.80
 -13 -16   1    9.30    7.30
 -21  -9   0    6.90    7.30
 -21  -8  -1    8.20    6.30
 -21  -7  -2    0.40    5.70
 -21  -6  -3    5.70    5.90
 -20 -11   1   11.30    8.20
 -20 -10   0   32.90    9.30
 -20  -9  -1    3.50    6.50
 -20  -8  -2    9.90    6.50
 -20  -7  -3    8.40    5.80
 -20  -6  -4    2.20    4.90
 -19 -12   1   25.40    9.20
 -19 -11   0   -1.70    6.80
 -19 -10  -1   23.90    7.70
 -19  -9  -2    0.60    5.10
 -19  -8  -3    5.40    4.60
 -19  -7  -4    4.10    5.10
 -19  -6  -5    3.60    4.70
 -18 -13   1    4.40    7.40
 -18 -12   0   34.30    9.00
 -18 -11  -1   10.80    6.50
 -18 -10  -2    7.70    5.80
 -18  -9  -3    6.20    5.10
 -18  -8  -4   -1.00    4.00
 -18  -7  -5   -0.60    4.00
 -17 -14   1    2.60    7.20
 -17 -13   0    3.50    6.60
 -17 -12  -1   -2.20    5.20
 -17 -11  -2    2.70    5.40
 -17 -10  -3    5.00    5.10
 -17  -9  -4   10.00    5.70
 -16 -15   1    5.20    7.10
 -16 -14   0    4.80    6.20
 -16 -13  -1    4.60    5.70
 -16 -12  -2    6.50    6.80
 -20 -11  -1   13.80    7.50
 -20 -10  -2   -0.70    5.70
 -20  -9  -3    1.20    5.60
 -19 -13   0   -3.60    6.20
 -19 -12  -1   36.90    9.10
 -19 -11  -2   55.59    9.90
 -19 -10  -3   13.10    6.40
 -18 -14   0    5.90    7.30
 -18 -13  -1    6.10    8.90

_computing_structure_solution     'SHELXT 2014/4 (Sheldrick, 2014)'
_computing_structure_solution     'SHELXT 2014/4 (Sheldrick, 2014)'
;
_shelx_hkl_checksum                52741
_olex2_submission_special_instructions  'No special instructions were received'
