# Supplementary material for: Various Approaches to Studying the Phase Transition in an Octamethylcyclotetrasiloxane Crystal: From X-ray Structural Analysis to Metadynamics
Source: Int J Mol Sci. 2022 Aug 13;23(16):9073. doi: 10.3390/ijms23169073 (PMC9408834; doi:10.3390/ijms23169073)
Supplement: Supplementary file 1 [file ijms-23-09073-s001.zip › 1-11_250.cif]

data_250
_audit_creation_date               2021-12-16
_audit_creation_method
;
Olex2 1.5
(compiled 2021.12.09 svn.r5202d8cf for OlexSys, GUI svn.r6439)
;
_shelxl_version_number             2014/6
_audit_contact_author_address      ?
_audit_contact_author_email        ?
_audit_contact_author_name         ''
_audit_contact_author_phone        ?
_publ_contact_author_id_orcid      ?
_publ_section_references
;
Dolomanov, O.V., Bourhis, L.J., Gildea, R.J, Howard, J.A.K. & Puschmann, H.
 (2009), J. Appl. Cryst. 42, 339-341.

Sheldrick, G.M. (2015). Acta Cryst. A71, 3-8.

Sheldrick, G.M. (2015). Acta Cryst. C71, 3-8.
;
_chemical_name_common              ?
_chemical_name_systematic          ?
_chemical_formula_moiety           'C8 H24 O4 Si4'
_chemical_formula_sum              'C8 H24 O4 Si4'
_chemical_formula_weight           296.63
_chemical_melting_point            ?
loop_
  _atom_type_symbol
  _atom_type_description
  _atom_type_scat_dispersion_real
  _atom_type_scat_dispersion_imag
  _atom_type_scat_source
 'C' 'C' 0.0033 0.0016 'International Tables Vol C Tables 4.2.6.8 and 6.1.1.4'
 'H' 'H' 0.0000 0.0000 'International Tables Vol C Tables 4.2.6.8 and 6.1.1.4'
 'O' 'O' 0.0106 0.0060 'International Tables Vol C Tables 4.2.6.8 and 6.1.1.4'
 'Si' 'Si' 0.0817 0.0704 'International Tables Vol C Tables 4.2.6.8 and 6.1.1.4'

_shelx_space_group_comment
;
The symmetry employed for this shelxl refinement is uniquely defined
by the following loop, which should always be used as a source of
symmetry information in preference to the above space-group names.
They are only intended as comments.
;
_space_group_crystal_system        'tetragonal'
_space_group_IT_number             88
_space_group_name_H-M_alt          'I 41/a'
_space_group_name_Hall             '-I 4ad'
loop_
  _space_group_symop_operation_xyz
 'x, y, z'
 '-x+1/2, -y, z+1/2'
 '-y+3/4, x+1/4, z+1/4'
 'y+3/4, -x+3/4, z+3/4'
 'x+1/2, y+1/2, z+1/2'
 '-x+1, -y+1/2, z+1'
 '-y+5/4, x+3/4, z+3/4'
 'y+5/4, -x+5/4, z+5/4'
 '-x, -y, -z'
 'x-1/2, y, -z-1/2'
 'y-3/4, -x-1/4, -z-1/4'
 '-y-3/4, x-3/4, -z-3/4'
 '-x+1/2, -y+1/2, -z+1/2'
 'x, y+1/2, -z'
 'y-1/4, -x+1/4, -z+1/4'
 '-y-1/4, x-1/4, -z-1/4'

_cell_length_a                     16.0850(16)
_cell_length_b                     16.0850(16)
_cell_length_c                     6.8911(9)
_cell_angle_alpha                  90
_cell_angle_beta                   90
_cell_angle_gamma                  90
_cell_volume                       1782.9(4)
_cell_formula_units_Z              4
_cell_measurement_reflns_used      2248
_cell_measurement_temperature      250
_cell_measurement_theta_max        27.066
_cell_measurement_theta_min        2.533
_shelx_estimated_absorpt_T_max     0.907
_shelx_estimated_absorpt_T_min     0.852
_exptl_absorpt_coefficient_mu      0.331
_exptl_absorpt_correction_T_max    0.7461
_exptl_absorpt_correction_T_min    0.5641
_exptl_absorpt_correction_type     multi-scan
_exptl_absorpt_process_details
;
SADABS-2014/5 (Bruker,2014/5) was used for absorption correction.
wR2(int) was 0.1504 before and 0.0383 after correction.
The Ratio of minimum to maximum transmission is 0.7561.
The \l/2 correction factor is 0.00150.
;
_exptl_absorpt_special_details     ?
_exptl_crystal_colour              colourless
_exptl_crystal_colour_primary      colourless
_exptl_crystal_density_diffrn      1.105
_exptl_crystal_density_meas        .
_exptl_crystal_density_method      ?
_exptl_crystal_description         irregular
_exptl_crystal_F_000               640
_exptl_crystal_recrystallization_method  'in situ, in 0.3 mm capillary'
_exptl_crystal_size_max            0.5
_exptl_crystal_size_mid            0.3
_exptl_crystal_size_min            0.3
_exptl_transmission_factor_max     ?
_exptl_transmission_factor_min     ?
_diffrn_reflns_av_R_equivalents    0.0382
_diffrn_reflns_av_unetI/netI       0.0418
_diffrn_reflns_Laue_measured_fraction_full  1.000
_diffrn_reflns_Laue_measured_fraction_max  0.993
_diffrn_reflns_limit_h_max         20
_diffrn_reflns_limit_h_min         -19
_diffrn_reflns_limit_k_max         23
_diffrn_reflns_limit_k_min         -16
_diffrn_reflns_limit_l_max         9
_diffrn_reflns_limit_l_min         -9
_diffrn_reflns_number              6282
_diffrn_reflns_point_group_measured_fraction_full  1.000
_diffrn_reflns_point_group_measured_fraction_max  0.993
_diffrn_reflns_theta_full          25.242
_diffrn_reflns_theta_max           30.768
_diffrn_reflns_theta_min           2.532
_diffrn_ambient_temperature        250
_diffrn_detector                   'CCD area detector'
_diffrn_detector_area_resol_mean   8
_diffrn_detector_type              'Bruker SMART CCD 1K area detector'
_diffrn_measured_fraction_theta_full  1.000
_diffrn_measured_fraction_theta_max  0.993
_diffrn_measurement_device         'three-circle diffractometer'
_diffrn_measurement_device_type    'Bruker APEX-II CCD'
_diffrn_measurement_method         '\w and \f scans'
_diffrn_radiation_monochromator    graphite
_diffrn_radiation_probe            x-ray
_diffrn_radiation_type             MoK\a
_diffrn_radiation_wavelength       0.71073
_diffrn_source                     'sealed X-ray tube'
_diffrn_source_current             30.0
_diffrn_source_power               1.5
_diffrn_source_target              Mo
_diffrn_source_voltage             50.0
_reflns_Friedel_coverage           0.000
_reflns_Friedel_fraction_full      .
_reflns_Friedel_fraction_max       .
_reflns_number_gt                  794
_reflns_number_total               1381
_reflns_special_details
;
 Reflections were merged by SHELXL according to the crystal
 class for the calculation of statistics and refinement.
 
 _reflns_Friedel_fraction is defined as the number of unique
 Friedel pairs measured divided by the number that would be
 possible theoretically, ignoring centric projections and
 systematic absences.
;
_reflns_threshold_expression       'I > 2\s(I)'
_computing_cell_refinement         'SAINT v8.34A (Bruker, 2013)'
_computing_data_collection         ?
_computing_data_reduction          'SAINT v8.34A (Bruker, 2013)'
_computing_molecular_graphics      'Olex2 1.5 (Dolomanov et al., 2009)'
_computing_publication_material    'Olex2 1.5 (Dolomanov et al., 2009)'
_computing_structure_refinement    'SHELXL 2014/6 (Sheldrick, 2015)'
_computing_structure_solution      'SHELXT 2014/4 (Sheldrick, 2014)'
_refine_diff_density_max           0.451
_refine_diff_density_min           -0.305
_refine_diff_density_rms           0.053
_refine_ls_extinction_coef         .
_refine_ls_extinction_method       none
_refine_ls_goodness_of_fit_ref     1.087
_refine_ls_hydrogen_treatment      constr
_refine_ls_matrix_type             full
_refine_ls_number_parameters       39
_refine_ls_number_reflns           1381
_refine_ls_number_restraints       0
_refine_ls_R_factor_all            0.1067
_refine_ls_R_factor_gt             0.0560
_refine_ls_restrained_S_all        1.087
_refine_ls_shift/su_max            0.000
_refine_ls_shift/su_mean           0.000
_refine_ls_structure_factor_coef   Fsqd
_refine_ls_weighting_details      
 'w=1/[\s^2^(Fo^2^)+(0.0890P)^2^+0.7790P] where P=(Fo^2^+2Fc^2^)/3'
_refine_ls_weighting_scheme        calc
_refine_ls_wR_factor_gt            0.1683
_refine_ls_wR_factor_ref           0.1906
_refine_special_details            ?
_olex2_refinement_description
;
1.a Idealised Me refined as rotating group:
 C003(H00A,H00B,H00C), C004(H00D,H00E,H00F)
;
_atom_sites_solution_hydrogens     geom
_atom_sites_solution_primary       dual
_atom_sites_solution_secondary     ?
loop_
  _atom_site_label
  _atom_site_type_symbol
  _atom_site_fract_x
  _atom_site_fract_y
  _atom_site_fract_z
  _atom_site_U_iso_or_equiv
  _atom_site_adp_type
  _atom_site_occupancy
  _atom_site_site_symmetry_order
  _atom_site_calc_flag
  _atom_site_refinement_flags_posn
  _atom_site_refinement_flags_adp
  _atom_site_refinement_flags_occupancy
  _atom_site_disorder_assembly
  _atom_site_disorder_group
 Si01 Si 0.38345(4) 0.81789(4) 0.66437(13) 0.0574(4) Uani 1 1 d . . . . .
 O002 O 0.39153(13) 0.71821(11) 0.6713(3) 0.0728(7) Uani 1 1 d . . . . .
 C003 C 0.2980(2) 0.8481(3) 0.5034(7) 0.1097(15) Uani 1 1 d . . . . .
 H00A H 0.3109 0.8312 0.3716 0.165 Uiso 1 1 calc R U . . .
 H00B H 0.2908 0.9079 0.5079 0.165 Uiso 1 1 calc R U . . .
 H00C H 0.2472 0.8211 0.5454 0.165 Uiso 1 1 calc R U . . .
 C004 C 0.3625(3) 0.8551(3) 0.9092(7) 0.1199(16) Uani 1 1 d . . . . .
 H00D H 0.3123 0.8291 0.9581 0.180 Uiso 1 1 calc R U . . .
 H00E H 0.3553 0.9150 0.9069 0.180 Uiso 1 1 calc R U . . .
 H00F H 0.4089 0.8411 0.9931 0.180 Uiso 1 1 calc R U . . .

loop_
  _atom_site_aniso_label
  _atom_site_aniso_U_11
  _atom_site_aniso_U_22
  _atom_site_aniso_U_33
  _atom_site_aniso_U_23
  _atom_site_aniso_U_13
  _atom_site_aniso_U_12
 Si01 0.0504(5) 0.0458(4) 0.0761(7) 0.0007(3) 0.0145(3) 0.0019(3)
 O002 0.0635(12) 0.0471(11) 0.1079(17) -0.0099(10) 0.0207(11) -0.0011(8)
 C003 0.056(2) 0.134(4) 0.140(4) 0.045(3) 0.000(2) 0.001(2)
 C004 0.164(4) 0.095(3) 0.101(3) -0.037(2) 0.050(3) -0.031(3)

_geom_special_details
;
 All esds (except the esd in the dihedral angle between two l.s. planes)
 are estimated using the full covariance matrix.  The cell esds are taken
 into account individually in the estimation of esds in distances, angles
 and torsion angles; correlations between esds in cell parameters are only
 used when they are defined by crystal symmetry.  An approximate (isotropic)
 treatment of cell esds is used for estimating esds involving l.s. planes.
;
loop_
  _geom_bond_atom_site_label_1
  _geom_bond_atom_site_label_2
  _geom_bond_distance
  _geom_bond_site_symmetry_2
  _geom_bond_publ_flag
 Si01 O002 1.6094(19) . ?
 Si01 O002 1.6227(19) 15_566 ?
 Si01 C003 1.831(4) . ?
 Si01 C004 1.822(4) . ?
 O002 Si01 1.6227(19) 12_767 ?
 C003 H00A 0.9700 . ?
 C003 H00B 0.9700 . ?
 C003 H00C 0.9700 . ?
 C004 H00D 0.9700 . ?
 C004 H00E 0.9700 . ?
 C004 H00F 0.9700 . ?

loop_
  _geom_angle_atom_site_label_1
  _geom_angle_atom_site_label_2
  _geom_angle_atom_site_label_3
  _geom_angle
  _geom_angle_site_symmetry_1
  _geom_angle_site_symmetry_3
  _geom_angle_publ_flag
 O002 Si01 O002 110.09(14) . 15_566 ?
 O002 Si01 C003 107.66(15) 15_566 . ?
 O002 Si01 C003 110.04(17) . . ?
 O002 Si01 C004 108.36(18) . . ?
 O002 Si01 C004 111.09(16) 15_566 . ?
 C004 Si01 C003 109.6(3) . . ?
 Si01 O002 Si01 149.18(15) . 12_767 ?
 Si01 C003 H00A 109.5 . . ?
 Si01 C003 H00B 109.5 . . ?
 Si01 C003 H00C 109.5 . . ?
 H00A C003 H00B 109.5 . . ?
 H00A C003 H00C 109.5 . . ?
 H00B C003 H00C 109.5 . . ?
 Si01 C004 H00D 109.5 . . ?
 Si01 C004 H00E 109.5 . . ?
 Si01 C004 H00F 109.5 . . ?
 H00D C004 H00E 109.5 . . ?
 H00D C004 H00F 109.5 . . ?
 H00E C004 H00F 109.5 . . ?

loop_
  _geom_torsion_atom_site_label_1
  _geom_torsion_atom_site_label_2
  _geom_torsion_atom_site_label_3
  _geom_torsion_atom_site_label_4
  _geom_torsion
  _geom_torsion_site_symmetry_1
  _geom_torsion_site_symmetry_2
  _geom_torsion_site_symmetry_3
  _geom_torsion_site_symmetry_4
  _geom_torsion_publ_flag
 O002 Si01 O002 Si01 -27.3(3) 15_566 . . 12_767 ?
 C003 Si01 O002 Si01 91.2(3) . . . 12_767 ?
 C004 Si01 O002 Si01 -149.0(3) . . . 12_767 ?

_shelx_res_file
;
TITL 250_a.res in I4(1)/a
REM Old TITL 250_a.res in I4(1)/a
REM SHELXT solution in I4(1)/a
REM R1 0.184, Rweak 0.008, Alpha 0.026, Orientation as input
REM Formula found by SHELXT: C2 O Si
CELL 0.71073 16.085 16.085 6.8911 90 90 90
ZERR 4 0.0016 0.0016 0.0009 0 0 0
LATT 2
SYMM 0.5-X,-Y,0.5+Z
SYMM 0.75-Y,0.25+X,0.25+Z
SYMM 0.75+Y,0.75-X,0.75+Z
SFAC C H O Si
UNIT 32 96 16 16

L.S. 4
PLAN  4
SIZE 0.3 0.3 0.5
TEMP -23.15
CONF
BOND $H
list 4
MORE -1
fmap 2
acta
REM <olex2.extras>
REM <HklSrc "%.\\250.hkl">
REM </olex2.extras>

WGHT    0.089000    0.779000
FVAR       0.51051
SI01  4    0.383446    0.817892    0.664365    11.00000    0.05040    0.04581 =
         0.07614    0.00069    0.01451    0.00190
O002  3    0.391532    0.718208    0.671286    11.00000    0.06346    0.04705 =
         0.10786   -0.00987    0.02070   -0.00114
C003  1    0.298037    0.848063    0.503372    11.00000    0.05554    0.13397 =
         0.13972    0.04509    0.00030    0.00145
AFIX 137
H00A  2    0.310859    0.831164    0.371607    11.00000   -1.50000
H00B  2    0.290828    0.907904    0.507859    11.00000   -1.50000
H00C  2    0.247185    0.821102    0.545376    11.00000   -1.50000
AFIX   0
C004  1    0.362535    0.855129    0.909238    11.00000    0.16375    0.09460 =
         0.10132   -0.03656    0.05017   -0.03118
AFIX 137
H00D  2    0.312295    0.829144    0.958052    11.00000   -1.50000
H00E  2    0.355292    0.914989    0.906932    11.00000   -1.50000
H00F  2    0.408886    0.841080    0.993102    11.00000   -1.50000
AFIX   0
HKLF 4

REM  250_a.res in I4(1)/a
REM R1 =  0.0560 for     794 Fo > 4sig(Fo)  and  0.1067 for all    1381 data
REM     39 parameters refined using      0 restraints

END

WGHT      0.0893      0.7881

REM Highest difference peak  0.451,  deepest hole -0.305,  1-sigma level  0.053
Q1    1   0.4085  0.8178  0.7832  11.00000  0.05    0.45
Q2    1   0.3909  0.7330  0.5509  11.00000  0.05    0.32
Q3    1   0.3008  0.8706  0.6709  11.00000  0.05    0.25
Q4    1   0.4251  0.8100  0.9534  11.00000  0.05    0.24
;
_shelx_res_checksum                38598
_shelx_hkl_file
;
   1   0  -1 8608.44  308.67
   1   0  -1 8336.07  317.97
  -1   0   1 8760.62  302.27
   2   0  -2   60.09    2.80
   3   0  -3  457.05   17.20
   3   0  -3  476.55   21.50
  -3   0   3  465.95   17.40
   4   0  -4  283.47   17.50
  -4   0   4  345.67   13.00
   5   0  -5   10.10    6.10
   5   0  -5    9.70    2.10
  -5   0   5   11.20    2.40
   6   0  -6    9.50    7.50
  -6   0   6    5.60    2.30
   7   0  -7   31.80   10.90
   8   0  -8   15.00    9.90
   9   0  -9   10.70    9.50
   9  -1  -8    5.00    9.40
   8  -1  -7   48.40   11.50
  -7   1   6    8.70    2.70
   7  -1  -6    3.50    6.70
  -6   1   5   36.70    3.90
   6  -1  -5   54.39   10.20
   6  -1  -5   39.00    3.70
  -5   1   4  196.78    8.90
   5  -1  -4  186.98   13.90
   5  -1  -4  198.08    8.80
  -4   1   3  144.09    6.30
   4  -1  -3  129.49    6.10
   4  -1  -3  125.39    5.60
   4  -1  -3  129.89    9.60
  -3   1   2   63.99    3.30
   3  -1  -2   54.69    5.40
   3  -1  -2   55.79    3.00
   3  -1  -2   62.39    3.30
  -2   1   1  505.05   18.30
   2  -1  -1  509.65   18.30
   2  -1  -1  493.25   18.30
   2  -1  -1  507.95   19.80
  -1   1   0    1.80    0.30
  -1   1   0   -0.10    0.10
   1  -1   0   -0.20    0.20
   1  -1   0    0.40    0.20
   0   1  -1 8612.44  325.07
   0   1  -1 8569.64  301.47
   0  -1   1 8138.69  322.67
   1   1  -2 3339.67  119.09
   1   1  -2 3347.77  117.49
  -1  -1   2 3284.87  118.99
   2   1  -3  607.24   22.00
   2   1  -3  570.94   25.40
  -2  -1   3  617.94   22.00
   3   1  -4   22.60    2.20
   3   1  -4   22.70    5.90
  -3  -1   4   17.70    2.20
   4   1  -5   53.19    9.20
  -4  -1   5   74.39    4.70
   5   1  -6    6.10    6.40
  -5  -1   6    5.10    2.00
   6   1  -7    4.50    6.90
   7   1  -8    5.80    9.50
   8   1  -9   -0.10    9.40
  10  -2  -8   -0.10    7.90
   9  -2  -7    5.90    8.20
  -8   2   6  106.79    7.30
   8  -2  -6  120.59   15.20
  -7   2   5    4.20    2.40
   7  -2  -5    1.40    6.10
  -6   2   4   90.89    6.00
   6  -2  -4   87.29    5.40
   6  -2  -4   96.79   10.60
  -5   2   3  260.27   11.40
   5  -2  -3  262.57   15.40
   5  -2  -3  291.27   11.00
   5  -2  -3  268.37   11.30
  -4   2   2  568.94   21.30
   4  -2  -2  581.04   21.00
   4  -2  -2  551.44   21.20
   4  -2  -2  568.24   24.20
  -3   2   1 1307.77   49.00
   3  -2  -1 1423.36   50.79
   3  -2  -1 1365.26   49.00
   3  -2  -1 1389.96   49.00
  -2   2   0   11.10    1.10
  -2   2   0   12.10    1.30
   2  -2   0   13.40    1.30
  -1   2  -1 1040.50   37.30
  -1   2  -1 1056.49   37.20
   1  -2   1 1018.70   37.20
   0   2  -2   39.40    2.40
   0   2  -2   40.90    3.90
   0  -2   2   36.60    2.30
   1   2  -3  342.47   16.00
   1   2  -3  345.47   13.00
  -1  -2   3  334.37   12.90
   2   2  -4    3.40    4.00
   2   2  -4    8.80    1.50
  -2  -2   4    4.80    1.50
   3   2  -5   40.60    8.00
  -3  -2   5   50.69    3.80
   4   2  -6   -3.10    5.20
  -4  -2   6    0.50    1.50
   5   2  -7   -1.00    6.60
   6   2  -8   -6.90    6.50
   7   2  -9  -12.70    8.00
  11  -3  -8    4.40    9.50
  10  -3  -7   -6.10    7.90
   9  -3  -6    7.90    8.30
   8  -3  -5   61.09   11.10
   7  -3  -4   34.10    8.20
   7  -3  -4   37.20    4.00
   6  -3  -3  168.58   12.60
   6  -3  -3  175.28    7.70
   6  -3  -3  166.78    8.20
   5  -3  -2  109.69    5.40
  -4   3   1  720.73   27.40
   4  -3  -1  783.82   29.40
   4  -3  -1  716.03   27.40
  -3   3   0    1.30    1.00
   3  -3   0    0.40    1.00
  -2   3  -1 2875.81  101.09
  -2   3  -1 2894.61  101.19
   2  -3   1 2782.82  100.99
  -1   3  -2   21.10    2.90
  -1   3  -2   22.60    2.20
   1  -3   2   21.80    2.10
   0   3  -3  437.36   17.10
   0   3  -3  452.35   19.70
   0  -3   3  461.75   17.10
   1   3  -4 1387.56   50.49
   1   3  -4 1399.16   54.99
  -1  -3   4 1411.66   50.39
   2   3  -5  218.58   15.20
  -2  -3   5  214.68    9.40
   3   3  -6   -4.60    5.60
  -3  -3   6    1.50    1.60
   4   3  -7   -1.60    5.90
   5   3  -8   -0.20    8.10
   6   3  -9   -1.80    7.90
  12  -4  -8   10.60    9.90
  11  -4  -7   -2.50    7.90
  10  -4  -6   57.09   12.90
   9  -4  -5   46.50   10.50
   8  -4  -4    3.30    2.60
   8  -4  -4    9.50    6.30
   7  -4  -3  169.98    8.70
   7  -4  -3  170.08   13.20
   6  -4  -2   26.30    2.90
   6  -4  -2   28.60    3.20
   6  -4  -2   23.30    5.00
  -5   4   1    2.90    1.90
  -5   4   1    1.20    1.10
   5  -4  -1    1.60    2.30
   5  -4  -1    2.50    1.30
  -4   4   0   44.90    3.40
   4  -4   0   44.90    3.40
  -3   4  -1  349.27   14.40
  -3   4  -1  383.76   13.90
   3  -4   1  358.46   14.50
  -2   4  -2    1.30    1.10
  -2   4  -2   -0.80    1.50
   2  -4   2    0.60    1.10
  -1   4  -3  163.68    8.90
  -1   4  -3  127.49    6.50
   1  -4   3  124.69    6.30
   0   4  -4  256.87   14.40
   0  -4   4  246.58   10.50
   1   4  -5  227.38   15.40
  -1  -4   5  236.08   10.10
   2   4  -6  196.58   16.20
  -2  -4   6  196.78    9.00
   3   4  -7   56.19   11.60
   4   4  -8   12.20    8.90
   5   4  -9    2.60    9.90
  12  -5  -7   -0.30    8.30
  11  -5  -6    2.90    8.70
  10  -5  -5   73.09   12.20
   9  -5  -4  302.07   19.80
   8  -5  -3  219.78   15.50
   8  -5  -3  232.78   11.20
  -7   5   2  411.66   17.50
   7  -5  -2  432.26   17.70
   7  -5  -2  425.56   20.90
   7  -5  -2  439.06   17.40
  -6   5   1    9.70    1.90
   6  -5  -1   12.80    2.20
  -5   5   0   -1.80    1.10
  -5   5   0   -0.30    1.10
   5  -5   0    1.30    1.30
  -4   5  -1  123.69    6.50
  -4   5  -1  123.69    5.60
   4  -5   1  123.89    6.50
  -3   5  -2 1167.18   43.00
  -3   5  -2 1146.89   42.70
   3  -5   2 1169.88   42.80
  -2   5  -3  896.21   34.30
  -2   5  -3  965.60   36.20
   2  -5   3  901.61   34.20
  -1   5  -4  120.59    9.80
   1  -5   4  136.89    6.80
   0   5  -5    8.20    5.50
   0  -5   5    8.50    2.00
   1   5  -6    0.40    5.10
  -1  -5   6    0.50    1.60
   2   5  -7    0.60    6.90
   3   5  -8   -1.90    6.40
   4   5  -9    3.80    9.10
  13  -6  -7   -2.40    9.50
  12  -6  -6    6.60    7.90
  11  -6  -5   42.70   11.30
  10  -6  -4   18.00    7.40
   9  -6  -3  107.29   11.70
   9  -6  -3  126.09    8.60
  -8   6   2  304.87   15.70
  -8   6   2  328.77   14.90
   8  -6  -2  390.66   15.50
  -7   6   1  327.77   14.10
  -7   6   1  298.97   13.70
   7  -6  -1  308.07   13.70
  -6   6   0   25.30    2.80
  -6   6   0   20.50    2.80
   6  -6   0   19.80    2.80
  -5   6  -1   50.69    4.30
  -5   6  -1   49.80    3.20
   5  -6   1   48.40    4.20
  -4   6  -2  583.34   22.70
  -4   6  -2  573.84   22.80
   4  -6   2  576.24   22.80
  -3   6  -3    1.80    1.70
  -3   6  -3    1.00    2.60
   3  -6   3    1.70    1.60
  -2   6  -4  199.18   12.40
   2  -6   4  211.68    9.70
  -1   6  -5   17.70    5.40
   1  -6   5   23.70    3.10
   0   6  -6    9.10    6.40
   0  -6   6    4.20    1.80
   1   6  -7   -5.20    6.40
   2   6  -8    9.20    8.60
   3   6  -9    3.00    7.90
  14  -7  -7    2.10   10.10
  13  -7  -6    5.20    8.40
  12  -7  -5   -1.90    8.00
  11  -7  -4   43.10    9.80
 -10   7   3  250.97   14.50
  -9   7   2   76.39    7.80
  -9   7   2   85.19    6.70
   9  -7  -2   90.69    7.00
  -8   7   1  462.15   19.30
  -8   7   1  449.86   19.30
   8  -7  -1  443.16   19.20
  -7   7   0    0.80    1.70
  -7   7   0    1.40    1.90
   7  -7   0    1.80    1.70
  -6   7  -1    0.80    1.40
  -6   7  -1   -1.00    1.80
   6  -7   1    0.20    1.70
  -5   7  -2   82.19    6.10
  -5   7  -2   96.89    5.80
   5  -7   2   87.39    6.00
  -4   7  -3  264.87   13.30
   4  -7   3  269.37   12.30
  -3   7  -4  408.56   21.10
   3  -7   4  484.25   18.80
  -2   7  -5    1.90    4.00
   2  -7   5    2.60    1.90
  -1   7  -6   -0.70    5.20
   1  -7   6    1.00    1.70
   0   7  -7   36.40   10.30
   1   7  -8   18.00   10.30
   2   7  -9    4.60    9.40
 -14   8   6    3.10    6.20
 -13   8   5    5.30    6.20
 -12   8   4   56.89    8.40
 -11   8   3   35.70    6.10
 -10   8   2   33.20    5.30
  -9   8   1  151.58    9.60
  -9   8   1  184.08   10.20
   9  -8  -1  173.98   10.00
  -8   8   0 1136.29   42.80
  -8   8   0 1184.78   44.20
   8  -8   0 1118.99   43.80
  -7   8  -1  503.25   21.50
  -7   8  -1  521.75   20.00
   7  -8   1  502.15   21.40
  -6   8  -2   29.80    3.80
  -6   8  -2   30.10    4.40
   6  -8   2   24.10    3.90
  -5   8  -3   71.69    6.60
   5  -8   3   61.99    5.60
  -4   8  -4   35.60    6.10
   4  -8   4   36.30    4.60
  -3   8  -5    4.30    4.60
   3  -8   5   -0.80    1.90
  -2   8  -6    0.00    5.10
   2  -8   6    0.60    1.90
  -1   8  -7   15.40    7.90
   0   8  -8  -10.80    6.60
   1   8  -9    3.70    8.80
 -15   9   6    3.50    5.90
 -14   9   5    2.40    5.40
 -13   9   4   11.40    5.50
 -12   9   3    6.00    4.40
 -11   9   2   28.00    5.30
 -10   9   1   16.60    3.90
 -10   9   1   14.60    4.00
  10  -9  -1   11.70    3.50
  -9   9   0    1.40    2.70
  -9   9   0    3.70    2.70
   9  -9   0    1.60    2.90
  -8   9  -1  563.94   22.50
  -8   9  -1  584.74   24.40
   8  -9   1  565.14   24.10
  -7   9  -2  836.72   33.00
   7  -9   2  869.41   33.90
  -6   9  -3   63.59    6.80
   6  -9   3   79.39    6.30
  -5   9  -4   20.50    5.00
   5  -9   4   19.00    3.60
  -4   9  -5   52.29    8.40
   4  -9   5   59.09    5.80
  -3   9  -6    0.80    5.10
   3  -9   6   -0.90    2.00
  -2   9  -7    3.90    6.50
  -1   9  -8   12.20    8.30
   0   9  -9    7.50    8.90
 -15  10   5   -0.30    4.70
 -14  10   4    6.30    5.40
 -13  10   3   16.10    5.40
 -12  10   2  135.59   10.00
 -11  10   1    7.40    3.50
 -10  10   0   52.59    5.00
 -10  10   0   29.20    4.60
  10 -10   0   57.89    6.30
  -9  10  -1  239.68   13.30
  -9  10  -1  246.48   11.30
   9 -10   1  234.28   12.80
  -8  10  -2    2.40    2.60
   8 -10   2   -0.90    2.50
  -7  10  -3  176.88   11.20
   7 -10   3  220.58   11.30
  -6  10  -4    2.20    3.30
   6 -10   4    4.80    2.70
  -5  10  -5    4.80    4.30
   5 -10   5    6.70    2.80
  -4  10  -6    6.10    5.80
  -3  10  -7    6.00    6.30
  -2  10  -8   -0.60    7.00
 -16  11   5    7.00    6.20
 -15  11   4   10.30    5.50
 -14  11   3   25.80    6.00
 -13  11   2   46.60    6.80
 -12  11   1    8.70    3.70
 -11  11   0   -1.40    2.10
 -10  11  -1    3.90    2.30
  10 -11   1    2.10    2.60
  -9  11  -2    7.60    2.90
   9 -11   2    8.30    3.40
  -8  11  -3    0.50    3.00
   8 -11   3    0.50    2.40
  -7  11  -4   31.80    5.90
  -6  11  -5   37.90    7.50
   6 -11   5   45.20    5.60
  -5  11  -6    7.40    5.50
  -4  11  -7    5.20    6.30
  -3  11  -8   13.70    9.40
 -16  12   4    2.50    5.40
 -15  12   3   25.90    6.60
 -14  12   2    7.00    4.50
 -13  12   1   58.29    6.70
 -12  12   0   20.60    3.90
 -11  12  -1    7.70    2.80
 -10  12  -2   24.50    4.40
  10 -12   2   18.90    4.80
  -9  12  -3   13.90    4.30
   9 -12   3   16.50    4.00
  -8  12  -4    3.60    3.90
   8 -12   4    7.20    3.20
  -7  12  -5   38.50    7.30
  -6  12  -6   62.49   10.20
 -16  13   3   -2.20    4.60
 -15  13   2   29.00    6.40
 -14  13   1   35.60    5.90
 -13  13   0   -1.10    2.70
 -12  13  -1    4.50    2.80
 -11  13  -2   28.40    5.10
 -10  13  -3    9.80    4.50
  10 -13   3   19.70    4.60
  -9  13  -4   -2.00    3.30
   9 -13   4   -0.50    2.70
 -16  14   2   -1.70    4.20
 -15  14   1    3.50    3.80
 -14  14   0   23.50    4.60
 -13  14  -1   -3.20    2.70
 -13  16  -1   16.80    7.60
 -14  16   0   10.60    4.30
 -15  16   1    5.60    4.40
  -9  15  -4   -2.60    5.90
 -10  15  -3   25.30    6.00
 -11  15  -2   19.00    5.20
 -12  15  -1    0.40    3.30
 -13  15   0   -1.40    3.00
 -14  15   1    2.20    3.60
 -15  15   2   -4.20    4.00
 -16  15   3    3.40    5.10
  -6  14  -6    2.50    5.60
  -7  14  -5    0.20    4.30
   8 -14   4   11.10    3.90
  -8  14  -4    8.40    5.10
  -9  14  -3   23.10    5.70
 -10  14  -2    0.10    3.30
 -11  14  -1   22.40    4.40
 -12  14   0    0.60    3.10
 -13  14   1   -5.00    3.00
 -14  14   2   -1.60    4.00
 -15  14   3   -2.50    4.30
  -4  13  -7    5.10    6.60
  -5  13  -6   -0.40    5.10
  -6  13  -5   35.10    7.60
   7 -13   4   51.19    6.30
  -7  13  -4   38.60    7.30
   8 -13   3   31.80    4.90
  -8  13  -3   41.50    6.60
   9 -13   2  144.19    9.80
  -9  13  -2  114.39    8.70
 -10  13  -1   83.89    6.80
 -11  13   0    0.90    2.70
 -12  13   1    0.80    3.50
 -13  13   2   20.80    5.70
 -14  13   3   18.50    6.10
 -15  13   4    2.50    4.90
  -2  12  -8    2.40    7.90
  -3  12  -7    5.20    6.50
  -4  12  -6   11.00    6.30
   5 -12   5    7.80    3.30
  -5  12  -5   19.00    6.30
   6 -12   4    4.90    2.80
  -6  12  -4    1.30    3.90
   7 -12   3   26.80    4.50
  -7  12  -3   29.80    5.70
   8 -12   2   20.20    4.30
  -8  12  -2   14.70    3.80
   9 -12   1   11.60    3.50
  -9  12  -1   19.20    3.40
 -10  12   0   13.90    3.50
 -11  12   1    7.20    3.60
 -12  12   2   39.60    6.40
 -13  12   3   -2.90    4.30
 -14  12   4   18.70    5.90
 -15  12   5    2.30    5.50
  -1  11  -8   13.40    9.10
  -2  11  -7    0.60    6.80
  -3  11  -6   -7.10    4.50
   4 -11   5    6.20    2.90
  -4  11  -5    6.00    5.00
   5 -11   4   79.69    6.80
  -5  11  -4   62.79    8.40
   6 -11   3   30.20    4.60
  -6  11  -3   31.40    5.30
   7 -11   2  228.78   12.00
  -7  11  -2  209.58   11.40
   8 -11   1  172.28   10.50
  -8  11  -1  164.28   10.70
  -8  11  -1  181.38    9.30
   9 -11   0   -3.00    2.00
  -9  11   0    3.60    2.40
  -9  11   0   -1.20    2.70
 -10  11   1    4.80    2.80
 -11  11   2   -0.50    3.80
 -12  11   3  102.19    9.70
 -13  11   4   23.70    6.70
 -14  11   5    7.90    5.30
   0  10  -8  -10.40    6.60
  -1  10  -7    5.20    7.20
  -2  10  -6    3.30    5.60
   3 -10   5   18.60    3.50
  -3  10  -5   25.70    6.70
   4 -10   4  117.59    7.90
  -4  10  -4   97.09    9.10
   5 -10   3   -1.00    2.10
  -5  10  -3   -1.80    3.30
   6 -10   2   78.49    6.80
  -6  10  -2   85.59    6.90
  -6  10  -2  129.19   10.30
   7 -10   1  550.44   23.30
  -7  10  -1  530.25   23.50
  -7  10  -1  557.74   22.00
   8 -10   0 1250.27   48.50
  -8  10   0 1255.07   48.70
  -8  10   0 1293.47   47.60
   9 -10  -1  246.98   14.10
  -9  10   1  220.28   13.50
  -9  10   1  252.27   12.70
 -10  10   2   96.69    8.30
 -11  10   3   82.89    8.20
 -12  10   4    3.40    4.80
 -13  10   5   22.90    6.90
 -14  10   6   -1.30    5.30
   2   9  -9    4.60    9.00
   1   9  -8   20.10   10.50
   0   9  -7   36.60   10.20
   1  -9   6    0.40    2.00
  -1   9  -6   -1.40    5.40
   2  -9   5    1.00    2.00
  -2   9  -5    4.60    4.60
   3  -9   4   24.80    3.90
  -3   9  -4   21.10    5.70
   4  -9   3   36.50    4.60
  -4   9  -3   25.40    5.10
   5  -9   2   93.99    6.60
  -5   9  -2   85.99    6.70
  -5   9  -2   87.09    6.40
   6  -9   1  120.99    7.80
  -6   9  -1  119.19    6.70
  -6   9  -1  119.99    8.20
   7  -9   0   -0.70    2.10
  -7   9   0    5.30    2.40
  -7   9   0    3.00    2.60
   8  -9  -1  570.64   24.00
  -8   9   1  566.64   24.20
  -8   9   1  580.24   23.90
  -9   9   2  345.47   16.90
 -10   9   3   53.69    7.40
 -11   9   4   42.80    7.20
 -12   9   5   21.50    6.60
 -13   9   6   -1.90    5.10
   3   8  -9    3.00    9.10
   2   8  -8    3.80    7.70
   1   8  -7   42.30   11.10
   0  -8   6  173.38    9.00
   0   8  -6  166.48   15.20
   1  -8   5   55.39    5.00
  -1   8  -5   62.99    9.40
   2  -8   4  171.38    9.10
  -2   8  -4  168.28   11.70
   3  -8   3  801.02   30.30
  -3   8  -3  750.12   31.70
   4  -8   2  406.16   17.30
  -4   8  -2  413.86   17.40
  -4   8  -2  403.46   17.50
   5  -8   1    0.20    1.70
  -5   8  -1   -0.90    1.70
  -5   8  -1    2.30    1.50
   6  -8   0  253.17   11.80
  -6   8   0  237.78   10.90
  -6   8   0  249.28   11.90
   7  -8  -1  512.55   21.80
  -7   8   1  543.45   21.90
  -7   8   1  527.25   22.00
   8  -8  -2   27.20    4.10
  -8   8   2   31.00    4.30
  -8   8   2   28.70    4.90
  -9   8   3  135.29    9.80
 -10   8   4   -2.00    3.70
  11  -8  -5    5.40    7.70
 -11   8   5    0.60    4.80
  12  -8  -6   11.90    9.10
  13  -8  -7    8.20    9.00
 -13   8   7   10.60    6.40
   4   7  -9   -9.70    8.00
   3   7  -8    3.70    7.20
   2   7  -7   18.80    8.80
  -1  -7   6    3.20    1.80
   1   7  -6    1.40    5.10
   0  -7   5   86.09    5.60
   0   7  -5   69.19    9.50
   1  -7   4   45.30    4.50
  -1   7  -4   44.60    6.90
   2  -7   3    7.00    2.10
  -2   7  -3    9.60    2.40
  -2   7  -3    8.00    3.30
   3  -7   2   69.29    4.80
  -3   7  -2   68.39    5.00
  -3   7  -2   62.19    5.00
   4  -7   1  879.91   32.70
  -4   7  -1  859.21   31.80
  -4   7  -1  829.62   32.60
   5  -7   0   -1.40    1.40
  -5   7   0    4.80    1.70
  -5   7   0    2.20    1.80
   6  -7  -1   -0.30    1.50
  -6   7   1    0.70    1.90
  -6   7   1    0.20    1.50
   7  -7  -2  258.07   12.00
  -7   7   2  261.17   12.00
  -7   7   2  246.08   12.70
   8  -7  -3   13.50    3.10
  -8   7   3   18.40    5.60
   9  -7  -4  232.28   17.70
  10  -7  -5   47.50   10.80
  11  -7  -6    3.50    8.80
  12  -7  -7   -6.60    7.50
   5   6  -9    1.00    9.50
   4   6  -8    6.10    9.20
   3   6  -7    7.50    8.00
  -2  -6   6    7.00    2.10
   2   6  -6    0.10    5.50
  -1  -6   5   40.90    4.00
   1   6  -5   43.10    8.10
   0  -6   4   24.30    3.00
   0   6  -4   18.70    5.70
   1  -6   3  241.28   10.70
  -1   6  -3  252.47   12.70
  -1   6  -3  245.08   11.00
   2  -6   2  112.29    6.10
  -2   6  -2  117.89    6.40
  -2   6  -2  118.59    6.80
   3  -6   1  967.30   36.40
  -3   6  -1 1002.40   35.80
  -3   6  -1  956.50   36.40
   4  -6   0   84.19    5.10
  -4   6   0   79.39    5.10
  -4   6   0   89.19    4.80
   5  -6  -1   47.00    3.80
  -5   6   1   49.30    4.00
  -5   6   1   39.50    3.80
   6  -6  -2    2.60    1.80
   6  -6  -2    1.90    1.60
  -6   6   2    2.00    2.70
  -6   6   2    1.30    1.50
   7  -6  -3   29.90    3.60
   7  -6  -3   20.50    7.40
   8  -6  -4    8.20    7.20
   9  -6  -5   78.49   12.50
  10  -6  -6   87.69   14.10
  11  -6  -7   11.10    9.00
  12  -6  -8   -0.60    9.50
   6   5  -9    0.60    9.10
   5   5  -8   17.10    8.60
   4   5  -7    3.70    6.80
  -3  -5   6    9.10    2.30
   3   5  -6   21.90    7.90
  -2  -5   5   79.49    5.00
   2   5  -5   81.89   10.40
  -1  -5   4  192.38    8.70
   1   5  -4  190.38   12.80
   0  -5   3 1968.50   72.59
   0   5  -3 2076.89   75.39
   0   5  -3 2041.20   72.99
   1  -5   2 1459.55   54.19
  -1   5  -2 1527.25   54.39
  -1   5  -2 1519.35   55.29
   2  -5   1  210.98    9.30
  -2   5  -1  229.78    9.20
  -2   5  -1  211.68    9.50
   3  -5   0   -0.50    1.00
  -3   5   0   -0.90    1.00
  -3   5   0   -1.20    1.00
   4  -5  -1  116.49    6.00
  -4   5   1  123.99    6.50
  -4   5   1  118.49    6.10
   5  -5  -2   36.00    3.10
   5  -5  -2   30.70    3.00
   5  -5  -2   24.30    4.90
  -5   5   2   23.70    2.70
   6  -5  -3  123.39   11.20
   6  -5  -3  150.68    7.50
   8  -5  -5   33.70    9.10
   9  -5  -6    8.10    8.40
  10  -5  -7   18.10    9.80
  11  -5  -8    3.80    8.30
   7   4  -9    2.20    8.50
   6   4  -8    6.30    8.00
   5   4  -7    8.80    8.30
  -4  -4   6    6.10    2.10
   4   4  -6    4.90    6.80
  -3  -4   5  113.29    6.20
   3   4  -5  118.49   12.50
  -2  -4   4   29.10    2.90
   2   4  -4   34.60    6.20
  -1  -4   3   97.89    5.20
   1   4  -3  106.89    7.70
   1   4  -3  113.79    5.50
   0  -4   2 1860.81   66.99
   0   4  -2 1879.61   67.09
   0   4  -2 1886.71   68.39
   1  -4   1 3313.27  121.09
  -1   4  -1 3386.66  120.09
  -1   4  -1 3486.75  123.29
   2  -4   0 7631.24  277.97
  -2   4   0 8024.50  277.17
  -2   4   0 7565.24  275.57
   3  -4  -1  372.36   14.20
  -3   4   1  371.26   14.30
  -3   4   1  346.77   14.60
   4  -4  -2  125.59    6.00
   4  -4  -2  124.49    8.80
   4  -4  -2  127.49    6.00
  -4   4   2  124.39    6.00
   5  -4  -3  235.68   10.20
   5  -4  -3  234.18   14.30
   5  -4  -3  240.28    9.90
   6  -4  -4  233.58   16.10
   6  -4  -4  220.48   10.00
   7  -4  -5   38.30    9.20
   8  -4  -6    4.10    7.40
   9  -4  -7   13.70    8.90
  10  -4  -8    1.10    9.50
   8   3  -9   -0.20   10.20
   7   3  -8   15.70   10.20
   6   3  -7   27.30   10.00
  -5  -3   6    3.00    2.00
   5   3  -6    0.70    6.20
  -4  -3   5   34.30    3.50
   4   3  -5   25.10    7.20
  -3  -3   4  464.45   17.80
   3   3  -4  456.35   22.60
  -2  -3   3  549.74   21.10
   2   3  -3  544.15   21.30
   2   3  -3  620.64   24.60
  -1  -3   2   64.29    3.40
   1   3  -2   70.39    5.10
   1   3  -2   62.69    3.50
   0  -3   1    3.20    0.80
   0   3  -1    3.70    0.90
   0   3  -1    4.90    1.20
   1  -3   0    0.30    0.50
  -1   3   0   -0.40    0.50
  -1   3   0    0.80    0.50
   2  -3  -1 2954.70  103.89
   2  -3  -1 2891.61  101.99
  -2   3   1 2813.92  102.69
   3  -3  -2  932.61   32.20
   3  -3  -2  855.01   35.20
   3  -3  -2  893.51   32.30
  -3   3   2  867.91   32.30
   4  -3  -3  160.08   11.60
   4  -3  -3  180.78    7.80
   4  -3  -3  187.08    7.50
   5  -3  -4   96.09   10.50
   5  -3  -4   98.09    5.30
   7  -3  -6   15.50    8.00
   8  -3  -7   -1.30    7.60
   9  -3  -8   -6.50    6.70
   9   2  -9   -7.80    8.30
   8   2  -8    2.30    9.10
   7   2  -7   -0.90    6.70
  -6  -2   6    2.70    2.00
   6   2  -6    4.70    6.10
  -5  -2   5   -0.10    1.80
   5   2  -5    6.70    5.90
  -4  -2   4  302.27   12.20
   4   2  -4  284.97   16.80
  -3  -2   3   30.90    2.60
   3   2  -3   34.70    5.60
   3   2  -3   29.40    2.40
  -2  -2   2  211.88    8.40
   2   2  -2  216.88   10.60
   2   2  -2  211.78    8.50
  -1  -2   1  495.05   19.80
   1   2  -1  520.65   19.80
   1   2  -1  630.64   20.90
   0  -2   0 4053.39  147.79
   0   2   0 4254.77  148.59
   0   2   0 4109.89  147.99
   1  -2  -1 1031.20   36.40
   1  -2  -1 1007.90   37.90
  -1   2   1 1031.50   36.40
   2  -2  -2  205.58    8.00
   2  -2  -2  199.88   10.70
   2  -2  -2  211.28    7.90
  -2   2   2  208.88    8.20
   3  -2  -3  524.15   19.20
   3  -2  -3  524.55   23.80
   3  -2  -3  532.85   19.50
  -3   2   3  528.55   19.60
   4  -2  -4   30.90    2.70
   4  -2  -4   29.60    6.60
  -4   2   4   23.50    2.70
   5  -2  -5   75.99   11.30
  -5   2   5   87.79    5.60
   6  -2  -6    2.90    6.40
  -6   2   6    7.90    2.50
   7  -2  -7   13.50    9.10
   8  -2  -8    1.60    9.10
   9  -2  -9   -1.20    9.40
   9   1  -8    9.10    9.10
   8   1  -7    6.80    7.60
  -7  -1   6    2.50    2.20
   7   1  -6   -1.10    6.00
  -6  -1   5   15.60    2.80
   6   1  -5   19.80    7.00
  -5  -1   4  130.09    6.70
   5   1  -4  130.79   11.20
  -4  -1   3  125.09    5.90
   4   1  -3  127.79    9.60
   4   1  -3  128.49    5.70
  -3  -1   2   31.10    2.30
  -2  -1   1  983.80   35.00
   2   1  -1  989.90   36.20
   2   1  -1  974.90   35.00
  -1  -1   0    0.30    0.20
  -1  -1   0    0.10    0.10
   1   1   0    0.20    0.20
   1   1   0   -0.10    0.10
   0  -1  -1 8549.64  299.87
   0   1   1 8297.37  310.77
   1  -1  -2 3214.88  114.99
   1  -1  -2 3240.28  112.69
   1  -1  -2 3054.49  112.69
  -1   1   2 3285.07  113.09
   2  -1  -3  378.06   15.10
   2  -1  -3  382.46   19.10
  -2   1   3  482.65   15.50
   3  -1  -4 1397.46   49.00
   3  -1  -4 1386.76   55.29
  -3   1   4 1355.26   49.50
   4  -1  -5  242.38    9.60
   4  -1  -5  253.37   17.10
  -4   1   5  233.78   10.30
   5  -1  -6    6.20    6.70
  -5   1   6    3.10    2.00
   6  -1  -7    8.50    8.20
   7  -1  -8   26.70   10.40
   8  -1  -9    2.20   10.20
  10   0  -8    2.70    8.60
   9   0  -7   29.30   11.50
  -8   0   6  165.38    9.10
   8   0  -6  148.69   15.60
  -7   0   5  147.49    8.10
  -6   0   4   19.40    3.00
   6   0  -4   27.90    6.80
  -5   0   3 2023.80   72.89
   5   0  -3 2046.10   72.59
   5   0  -3 2040.00   77.19
  -4   0   2 1843.62   65.19
   4   0  -2 1800.82   67.89
   4   0  -2 1839.72   65.09
  -2   0   0 4278.07  149.79
   2   0   0 4131.59  148.99
   2   0   0 4108.19  148.69
  -1   0  -1 8789.02  311.07
   1   0   1 8845.42  310.97
   1   0   1 8585.24  320.37
   0   0  -2   -2.20    1.90
   0   0   2   -1.00    0.40
   1   0  -3 2207.78   67.39
   1   0  -3 1595.44   70.59
  -1   0   3 1907.11   67.49
   2   0  -4  116.89   10.50
   2   0  -4  123.79    5.00
  -2   0   4  122.19    5.50
   3   0  -5  180.68   14.20
   3   0  -5  195.78    7.70
  -3   0   5  192.98    8.30
   4   0  -6   66.69   11.50
  -4   0   6   70.59    4.70
   5   0  -7    1.80    7.80
   6   0  -8    1.40    8.80
   7   0  -9   -2.10    8.20
  11  -1  -8   -3.60    8.70
  10  -1  -7   12.30    9.00
  -9   1   6   -1.00    2.50
   9  -1  -6   -2.40    6.60
  -8   1   5  280.47   12.90
   8  -1  -5  274.27   19.40
  -7   1   4  505.65   20.60
   7  -1  -4  480.45   25.90
   7  -1  -4  542.05   20.60
  -6   1   3    0.80    1.60
   6  -1  -3    0.90    1.20
   6  -1  -3    4.80    1.80
   6  -1  -3   -3.30    3.80
  -5   1   2  839.42   30.40
   5  -1  -2  704.03   29.90
   5  -1  -2  933.61   33.70
  -4   1   1 1099.19   39.50
   4  -1  -1 1099.49   41.00
   4  -1  -1 1072.69   39.30
  -3   1   0   -0.10    0.50
   3  -1   0    0.10    0.60
   3  -1   0    0.70    0.80
   3  -1   0   -0.10    0.50
  -2   1  -1  535.35   20.20
  -2   1  -1  542.75   20.30
   2  -1   1  526.05   20.00
   2  -1   1  635.74   20.50
  -1   1  -2 3321.97  116.59
  -1   1  -2 3258.07  115.79
   1  -1   2 3224.48  115.79
   0   1  -3 1568.44   57.19
   0   1  -3 1631.04   60.59
   0  -1   3 1647.54   57.29
   1   1  -4  117.39    9.60
   1   1  -4  122.99    5.30
  -1  -1   4  127.79    5.50
   2   1  -5   19.90    6.50
  -2  -1   5   30.90    2.70
   3   1  -6    5.00    6.80
  -3  -1   6    6.30    1.80
   4   1  -7   12.20    8.10
  -4  -1   7    2.70    1.90
   5   1  -8    0.40    8.70
   6   1  -9  -10.50    8.10
  12  -2  -8   -4.00    8.90
  11  -2  -7   -3.40    8.30
  10  -2  -6   40.10   11.30
  -9   2   5  106.09    7.40
   9  -2  -5   94.49   13.10
   8  -2  -4   68.59   10.60
  -7   2   3  280.47   12.50
   7  -2  -3  268.67   16.20
   7  -2  -3  290.27   12.40
  -6   2   2   34.30    3.40
   6  -2  -2   35.10    5.30
   6  -2  -2   34.80    3.20
   6  -2  -2   38.10    3.00
   5  -2  -1   84.59    4.70
   5  -2  -1   80.29    5.90
   5  -2  -1   87.89    4.60
  -4   2   0  817.82   29.60
  -4   2   0  785.22   29.30
   4  -2   0  815.62   29.70
  -3   2  -1 1381.86   51.39
  -3   2  -1 1530.15   51.29
   3  -2   1 1412.16   51.49
   3  -2   1 1419.06   50.89
  -2   2  -2  205.98    9.30
  -2   2  -2  207.58    8.50
   2  -2   2  216.88    8.60
  -1   2  -3  589.64   22.00
  -1   2  -3  579.84   24.50
   1  -2   3  622.34   22.10
   0   2  -4  156.38    6.40
   0  -2   4  133.79    6.30
   1   2  -5  198.08   14.00
  -1  -2   5  184.08    8.00
   2   2  -6   87.09   11.80
  -2  -2   6   90.79    5.10
   3   2  -7    8.00    7.90
  -3  -2   7    6.50    2.00
   4   2  -8   -1.40    8.10
   5   2  -9   -0.60    8.60
  13  -3  -8    3.40    8.70
  12  -3  -7   -0.90    8.60
  11  -3  -6    3.10    7.70
  10  -3  -5   -2.60    6.40
   9  -3  -4   39.80    8.80
   8  -3  -3   -0.30    4.80
   8  -3  -3   10.60    2.90
   7  -3  -2  720.93   31.20
   7  -3  -2  762.72   28.40
   7  -3  -2  721.33   27.80
   6  -3  -1  469.05   20.00
   6  -3  -1  456.25   18.10
   6  -3  -1  443.26   17.90
  -5   3   0    1.40    1.20
   5  -3   0    1.00    1.30
  -4   3  -1  773.72   28.40
  -4   3  -1  791.42   27.40
   4  -3   1  713.13   28.20
  -3   3  -2  932.31   33.80
  -3   3  -2  893.41   33.40
   3  -3   2  902.61   33.40
  -2   3  -3   56.89    5.20
  -2   3  -3   54.79    3.40
   2  -3   3   41.10    3.10
  -1   3  -4   17.20    2.20
  -1   3  -4   16.30    4.40
   1  -3   4   20.80    2.30
   0   3  -5  166.88   12.80
   0  -3   5  179.28    7.80
   1   3  -6    4.10    5.30
  -1  -3   6    0.20    1.40
   2   3  -7   48.40   11.00
  -2  -3   7   48.40    4.20
   3   3  -8   37.60   11.10
   4   3  -9    0.30    8.00
  13  -4  -7    5.50   10.10
  12  -4  -6   -1.60    7.30
  11  -4  -5    3.80    8.00
  10  -4  -4    4.30    6.00
   9  -4  -3   29.60    8.20
   9  -4  -3   35.90    4.50
   8  -4  -2   23.90    3.50
   8  -4  -2   19.80    6.00
   8  -4  -2   19.70    3.00
  -7   4   1 1060.09   39.70
   7  -4  -1 1027.70   39.60
   7  -4  -1 1073.09   41.90
   7  -4  -1 1102.39   40.00
  -6   4   0  997.00   35.60
  -6   4   0  971.10   36.10
   6  -4   0  927.31   36.10
  -5   4  -1    2.60    0.90
  -5   4  -1    0.90    1.20
   5  -4   1    2.60    1.30
  -4   4  -2  121.99    6.30
  -4   4  -2  122.29    6.20
   4  -4   2  122.09    6.40
  -3   4  -3  458.85   18.90
  -3   4  -3  442.86   17.40
   3  -4   3  420.46   17.30
  -2   4  -4  272.57   14.50
   2  -4   4  269.27   11.40
   1  -4   5   58.59    4.20
   0   4  -6   78.89   10.90
   0  -4   6   76.79    4.80
   1   4  -7   41.00    9.30
  -1  -4   7   42.80    4.50
   2   4  -8   -1.70    7.70
   3   4  -9    6.50    9.80
  14  -5  -7    7.90    9.20
  13  -5  -6   13.50    8.80
  12  -5  -5    6.20    8.10
  11  -5  -4   69.39   11.10
  10  -5  -3  222.08   16.60
   9  -5  -2   62.29    8.80
   9  -5  -2   67.89    6.30
  -8   5   1   30.00    4.20
  -8   5   1   34.20    3.80
   8  -5  -1   24.30    3.40
   8  -5  -1   28.30    3.70
  -7   5   0   -0.70    1.40
  -7   5   0   -0.10    1.40
   7  -5   0    0.80    1.60
  -6   5  -1   16.90    1.90
  -6   5  -1   14.40    2.30
   6  -5   1   12.50    2.50
  -5   5  -2   27.50    3.10
  -5   5  -2   27.00    2.90
   5  -5   2   31.90    3.60
  -4   5  -3   43.70    4.70
  -4   5  -3   32.10    3.50
   4  -5   3   29.90    3.30
  -3   5  -4  227.48   13.00
   3  -5   4  233.28   10.50
  -2   5  -5    1.40    4.20
   2  -5   5    1.50    1.60
  -1   5  -6    4.80    5.50
   1  -5   6    4.10    1.80
   0   5  -7    5.70    7.10
   1   5  -8    3.10    7.90
   2   5  -9    1.00    8.30
  15  -6  -7   -3.60    9.50
  14  -6  -6   -3.30    8.00
  13  -6  -5   -8.20    6.30
  12  -6  -4   33.60    9.70
  11  -6  -3    7.80    6.80
 -10   6   2  212.68   12.30
  10  -6  -2  220.18   11.60
  -9   6   1  105.19    7.10
  -9   6   1  104.29    7.00
   9  -6  -1  108.49    7.30
   9  -6  -1  112.59    7.60
  -8   6   0   65.89    4.90
  -8   6   0   66.09    5.40
   8  -6   0   64.29    5.50
  -7   6  -1  331.37   14.40
  -7   6  -1  324.27   12.80
   7  -6   1  301.47   14.10
  -6   6  -2    1.60    1.70
  -6   6  -2    0.20    1.40
   6  -6   2    2.60    2.00
  -5   6  -3  276.67   13.20
   5  -6   3  273.77   12.60
  -4   6  -4    8.60    4.00
   4  -6   4   30.50    3.50
  -3   6  -5  168.48   12.40
   3  -6   5  160.78    8.50
  -2   6  -6    2.70    5.20
   2  -6   6    1.30    1.70
  -1   6  -7    1.90    6.20
   0   6  -8    8.30    7.80
   1   6  -9    0.90    8.60
  15  -7  -6   -2.30    9.40
  14  -7  -5    6.20    9.20
  13  -7  -4   -7.70    7.10
 -12   7   3  127.29    9.90
 -11   7   2  343.87   16.80
 -10   7   1    1.40    3.00
 -10   7   1    4.80    2.60
  -9   7   0   -3.80    2.30
  -9   7   0   -2.60    2.00
   9  -7   0   -3.20    2.50
  -8   7  -1  456.35   18.10
  -8   7  -1  486.45   20.00
   8  -7   1  447.16   19.70
  -7   7  -2  263.57   12.60
  -7   7  -2  248.38   11.40
   7  -7   2  267.77   12.60
  -6   7  -3  128.89    8.40
   6  -7   3  142.29    8.20
  -5   7  -4  272.07   15.00
   5  -7   4  276.87   12.90
  -4   7  -5  132.69   11.10
   4  -7   5  140.89    8.10
  -3   7  -6    5.80    5.40
   3  -7   6   -1.20    1.60
  -2   7  -7   -2.00    5.80
  -1   7  -8   -3.00    7.10
   0   7  -9   12.20    9.80
 -16   8   6    6.60    6.10
 -15   8   5    2.90    5.40
 -14   8   4   10.50    5.80
 -13   8   3   87.49    8.50
 -12   8   2    2.70    3.70
 -11   8   1  242.98   13.50
 -11   8   1  262.27   13.00
  11  -8  -1  248.58   13.30
 -10   8   0    4.80    2.50
 -10   8   0    5.40    3.00
  10  -8   0    6.70    3.10
  -9   8  -1  139.99    9.50
  -9   8  -1  153.58    7.50
   9  -8   1  135.39    9.40
  -8   8  -2   25.10    3.60
   8  -8   2   29.30    4.50
  -7   8  -3  306.17   15.50
   7  -8   3  369.66   15.90
  -6   8  -4  139.39   10.00
   6  -8   4  145.89    8.60
  -5   8  -5   54.49    7.80
   5  -8   5   38.20    4.60
  -4   8  -6   71.09   10.10
   4  -8   6   62.99    5.70
  -3   8  -7    2.90    6.20
  -2   8  -8   22.80    9.30
  -1   8  -9    6.30    7.90
 -16   9   5   23.90    7.20
 -15   9   4   14.30    6.00
 -14   9   3   10.20    5.40
 -13   9   2   58.59    7.30
 -12   9   1   90.09    7.40
 -11   9   0   -1.30    2.00
 -11   9   0    3.90    3.00
  11  -9   0    2.50    2.60
 -10   9  -1   12.50    3.40
 -10   9  -1   17.30    2.90
  10  -9   1   10.80    3.40
  -9   9  -2  329.97   14.60
   9  -9   2  320.47   15.80
  -8   9  -3   95.39    7.40
   8  -9   3  120.39    8.20
  -7   9  -4    2.80    2.90
   7  -9   4    0.20    2.10
  -6   9  -5    1.60    3.90
   6  -9   5    2.10    2.30
  -4   9  -7   17.70    7.40
  -3   9  -8    4.10    7.30
 -17  10   5   16.10    7.00
 -16  10   4    0.60    5.20
 -15  10   3   38.90    7.30
 -14  10   2    2.70    3.90
 -13  10   1    9.20    3.70
 -12  10   0   16.50    3.50
 -11  10  -1    8.40    2.50
  11 -10   1    7.90    3.30
 -10  10  -2   62.59    5.50
  10 -10   2   65.39    6.80
  -9  10  -3    8.70    3.40
   9 -10   3   13.90    3.70
  -8  10  -4   27.90    5.40
   8 -10   4   45.10    5.70
  -7  10  -5    6.40    4.10
   7 -10   5   -0.30    2.30
  -6  10  -6   25.00    6.90
 -17  11   4   12.30    6.40
 -16  11   3    0.20    4.90
 -15  11   2   58.19    7.80
 -14  11   1   40.30    5.80
 -13  11   0   -1.30    2.40
 -12  11  -1   10.40    2.90
 -11  11  -2   -0.50    2.50
  11 -11   2   -1.00    2.60
 -10  11  -3   34.90    5.50
  10 -11   3   56.29    6.60
   9 -11   4   25.70    4.70
 -17  12   3    4.00    5.50
 -16  12   2   -2.30    4.10
 -15  12   1   33.50    5.70
 -14  12   0  109.09    7.90
 -13  12  -1   61.49    5.90
 -12  12  -2   53.99    9.20
  11 -12   3   49.99    6.40
  10 -12   4   25.50    5.20
 -10  17  -3   -0.70    5.10
 -11  17  -2   11.20    5.30
 -12  17  -1   17.20    5.10
 -13  17   0    2.30    3.90
 -14  17   1    8.20    4.70
  -7  16  -5    7.40    6.30
  -8  16  -4   -5.20    4.70
  -9  16  -3    1.40    4.90
 -10  16  -2    6.10    4.50
 -11  16  -1    2.80    4.00
 -12  16   0    0.10    3.20
 -13  16   1    4.50    4.20
 -14  16   2    2.00    4.30
 -15  16   3    5.50    5.20
  -4  15  -7   -2.00    6.30
  -5  15  -6   -4.80    5.50
  -6  15  -5   -5.40    4.80
   7 -15   4   -0.80    2.90
  -7  15  -4   -0.60    4.60
  -8  15  -3    3.80    4.70
  -9  15  -2   57.59    7.20
 -10  15  -1   39.90    5.70
 -11  15   0   -3.00    2.90
 -12  15   1    2.40    3.60
 -13  15   2   -2.60    3.50
 -14  15   3    0.60    4.10
  -3  14  -7    0.20    6.70
  -4  14  -6   -1.60    5.80
  -5  14  -5   -5.80    4.60
   6 -14   4    2.50    2.90
  -6  14  -4   10.90    5.50
   7 -14   3   -3.00    2.30
  -7  14  -3   -5.40    3.20
  -8  14  -2   -3.50    2.90
  -9  14  -1  135.19    8.90
 -10  14   0  230.28   12.40
 -11  14   1   18.80    4.70
 -12  14   2    6.60    4.40
 -13  14   3   10.90    5.60
 -14  14   4   -4.30    4.20
  -1  13  -8   -3.90    6.90
  -2  13  -7   15.10    8.60
  -3  13  -6    7.60    6.20
   4 -13   5    1.60    2.70
  -4  13  -5    3.30    5.20
   5 -13   4   24.80    4.70
  -5  13  -4   20.50    6.30
   6 -13   3    8.40    3.30
  -6  13  -3   12.00    4.90
   7 -13   2    5.70    3.10
  -7  13  -2    6.10    3.60
  -8  13  -1   27.60    4.30
  -9  13   0   -1.00    2.40
 -10  13   1   77.09    7.10
 -11  13   2   28.50    5.90
 -12  13   3   -0.10    4.30
 -13  13   4   -1.90    4.80
 -14  13   5    0.80    4.60
   0  12  -8    1.40    8.00
  -1  12  -7    5.40    6.90
  -2  12  -6   32.80    9.30
   3 -12   5   12.90    3.50
  -3  12  -5   13.60    5.90
   4 -12   4   -1.10    2.50
  -4  12  -4    1.10    4.00
   5 -12   3   73.09    6.80
  -5  12  -3   68.29    8.20
   6 -12   2   69.49    6.40
  -6  12  -2   62.39    6.40
   7 -12   1    6.40    3.30
  -7  12  -1    3.50    3.60
  -7  12  -1    2.80    2.60
  -8  12   0   14.90    3.40
  -9  12   1   18.20    3.90
 -10  12   2   27.10    5.60
 -11  12   3   61.39    8.30
 -12  12   4    4.60    5.20
 -13  12   5   16.00    6.40
 -14  12   6   -2.50    4.70
   1  11  -8    9.80    8.80
   0  11  -7   -8.20    5.40
  -1  11  -6    1.50    6.40
   2 -11   5   11.70    3.10
  -2  11  -5   18.30    6.60
   3 -11   4    0.90    2.30
  -3  11  -4   -4.70    3.90
   4 -11   3   66.49    6.20
  -4  11  -3   66.49    7.60
   5 -11   2    2.10    2.20
  -5  11  -2   -1.90    2.60
   6 -11   1  208.68   10.80
  -6  11  -1  191.98   11.20
  -6  11  -1  173.68    9.40
   7 -11   0   -0.40    2.20
  -7  11   0    1.20    2.30
  -7  11   0    2.90    2.90
  -8  11   1  159.08    9.40
  -9  11   2   20.80    4.90
 -10  11   3   46.60    6.60
 -11  11   4  149.69   11.70
 -12  11   5   20.00    6.60
 -13  11   6    6.80    5.90
   2  10  -8    3.70    8.40
   1  10  -7    4.50    8.10
   0 -10   6   56.59    7.00
   0  10  -6   60.29   10.90
   1 -10   5   19.40    3.60
  -1  10  -5   19.80    6.90
   2 -10   4  146.29    8.60
  -2  10  -4  139.59   11.80
   3 -10   3  666.03   26.20
  -3  10  -3  616.04   27.70
   4 -10   2    6.20    2.40
  -4  10  -2    1.90    2.50
  -4  10  -2   -0.90    2.30
   5 -10   1  105.99    7.40
  -5  10  -1  100.29    7.60
  -5  10  -1  113.69    6.70
   6 -10   0  350.36   15.90
  -6  10   0  358.56   15.20
  -6  10   0  332.67   16.20
   7 -10  -1  532.35   23.10
  -7  10   1  558.74   23.20
  -7  10   1  569.74   23.60
  -8  10   2    5.80    3.40
  -9  10   3   11.50    4.60
 -10  10   4   10.90    4.60
 -11  10   5   52.09    8.70
 -12  10   6   27.80    7.80
 -13  10   7    1.10    5.90
   3   9  -8   12.10    9.00
   2   9  -7   17.00    8.90
  -1  -9   6   -0.60    1.90
   1   9  -6    0.80    6.40
   0  -9   5  193.58    9.90
   0   9  -5  180.38   14.80
   1  -9   4  194.18    9.80
  -1   9  -4  175.68   12.60
   2  -9   3  498.55   20.70
  -2   9  -3  506.75   22.90
   3  -9   2 1756.02   65.49
  -3   9  -2 1813.02   65.89
  -3   9  -2 1778.52   65.89
   4  -9   1  552.84   23.10
  -4   9  -1  596.24   22.50
  -4   9  -1  561.24   23.30
   5  -9   0   -2.90    1.70
  -5   9   0   -1.90    1.90
  -5   9   0    0.60    1.90
   6  -9  -1  121.39    7.30
  -6   9   1  114.09    7.50
  -6   9   1  111.59    7.40
   7  -9  -2  915.31   35.20
  -7   9   2  915.11   35.50
  -7   9   2  892.41   36.00
  -8   9   3  125.99    9.80
  -9   9   4   -3.90    4.10
 -10   9   5   11.30    5.40
 -11   9   6   -0.80    4.70
 -12   9   7   -1.10    4.90
   4   8  -8    7.50    9.60
   3   8  -7    2.60    7.40
  -2  -8   6  109.59    6.80
   2   8  -6  107.49   14.10
  -1  -8   5  277.87   12.50
   1   8  -5  276.47   18.20
   0  -8   4   51.99    4.90
   0   8  -4   42.20    7.30
   1  -8   3   10.20    2.40
  -1   8  -3    9.40    3.60
   2  -8   2   69.59    5.00
  -2   8  -2   67.39    5.30
  -2   8  -2   59.29    5.10
   3  -8   1  386.26   16.60
  -3   8  -1  416.56   16.20
  -3   8  -1  392.76   16.80
   4  -8   0  502.75   20.10
  -4   8   0  502.95   20.30
  -4   8   0  486.95   19.60
   5  -8  -1    0.20    1.50
  -5   8   1   -0.20    1.70
  -5   8   1   -1.40    1.70
   6  -8  -2   23.70    3.20
  -6   8   2   20.40    3.90
  -6   8   2   18.30    3.10
   7  -8  -3  371.66   15.80
  -7   8   3  364.36   16.00
  -7   8   3  350.36   17.50
  -8   8   4   98.09    8.80
   9  -8  -5    0.60    6.60
  10  -8  -6    8.70    8.20
  11  -8  -7   12.90   11.00
   6   7  -9   -0.70    9.20
   5   7  -8    2.60    8.60
   4   7  -7    5.30    7.00
  -3  -7   6   22.90    3.30
   3   7  -6   23.20    8.30
  -2  -7   5    5.70    2.00
   2   7  -5   -1.00    5.30
  -1  -7   4  526.95   20.60
   1   7  -4  505.25   24.50
   0  -7   3  145.79    7.40
   0   7  -3  145.79    9.80
   0   7  -3  155.98    7.90
   1  -7   2  166.88    8.10
  -1   7  -2  169.78    9.10
  -1   7  -2  163.88    8.20
   2  -7   1  197.78    9.20
  -2   7  -1  196.48    9.40
  -2   7  -1  206.98    9.00
   3  -7   0   -0.30    1.10
  -3   7   0    0.20    1.20
  -3   7   0    2.40    1.50
   4  -7  -1  836.42   31.60
  -4   7   1  837.82   31.80
  -4   7   1  831.02   31.70
   5  -7  -2   90.89    5.50
  -5   7   2   90.99    6.50
  -5   7   2   90.39    5.70
   6  -7  -3  137.09    7.50
  -6   7   3  153.88    9.90
  -6   7   3  137.49    7.70
   7  -7  -4   27.60    8.60
   8  -7  -5   93.29   13.50
   9  -7  -6    3.80    8.40
  10  -7  -7    1.30    9.40
  11  -7  -8    2.20    9.10
   7   6  -9  -11.20    8.10
   6   6  -8   -0.60    8.70
   5   6  -7    2.80    7.70
  -4  -6   6   -0.40    1.60
   4   6  -6    3.80    6.60
  -3  -6   5    6.10    2.10
   3   6  -5    7.70    5.40
  -2  -6   4   88.69    5.40
   2   6  -4   95.69    9.30
  -1  -6   3    1.70    1.40
   1   6  -3    1.80    1.60
   1   6  -3    6.90    3.00
   0  -6   2  189.78    8.50
   0   6  -2  179.98    8.50
   0   6  -2  196.68    9.70
   1  -6   1 1110.59   41.70
  -1   6  -1 1177.68   41.80
  -1   6  -1 1132.09   41.90
   2  -6   0  136.69    6.80
  -2   6   0  153.48    7.10
  -2   6   0  147.79    6.70
   3  -6  -1 1013.50   35.90
  -3   6   1  934.21   35.90
  -3   6   1  962.30   36.20
   4  -6  -2  582.94   21.80
  -4   6   2  559.74   21.90
  -4   6   2  555.14   22.90
   5  -6  -3  287.97   16.80
   5  -6  -3  283.57   11.90
  -5   6   3  270.37   12.00
   6  -6  -4   -0.50    1.50
   6  -6  -4   -1.60    5.30
   7  -6  -5    5.80    6.70
   8  -6  -6   45.10   11.70
   9  -6  -7   17.20    9.40
  10  -6  -8    1.40    8.50
   7   5  -8   20.90    9.70
   6   5  -7   12.30    9.00
  -5  -5   6    4.00    2.10
   5   5  -6   -5.40    5.90
  -4  -5   5   15.50    2.60
   4   5  -5   20.70    6.70
  -3  -5   4  101.19    5.70
   3   5  -4  107.09   10.20
  -2  -5   3  267.77   11.20
   2   5  -3  258.87   13.90
   2   5  -3  280.27   11.60
  -1  -5   2  660.73   24.30
   1   5  -2  650.43   25.90
   1   5  -2  635.54   24.40
   0  -5   1  316.17   12.70
   0   5  -1  316.67   12.70
   0   5  -1  325.77   13.00
   1  -5   0   -3.00    0.90
  -1   5   0   -2.30    1.10
  -1   5   0   -3.60    1.10
   2  -5  -1  216.18    8.90
  -2   5   1  212.88    9.00
  -2   5   1  209.38    9.30
   3  -5  -2 1114.99   39.80
  -3   5   2 1074.59   41.10
  -3   5   2 1097.59   40.00
   4  -5  -3   32.50    6.10
   4  -5  -3   37.10    2.90
   4  -5  -3   39.20    3.00
  -4   5   3   40.10    3.30
   5  -5  -4   61.29    4.00
   5  -5  -4   63.19   10.10
   6  -5  -5    5.70    6.40
   6  -5  -5   11.70    1.70
   7  -5  -6    0.80    7.10
   8  -5  -7   20.00    9.60
   9  -5  -8    8.70    9.70
   8   4  -8   10.80    9.60
   7   4  -7   32.10    9.80
  -6  -4   6   76.89    5.80
   6   4  -6   72.89   11.70
  -5  -4   5   39.80    4.00
   5   4  -5   38.80    8.10
  -4  -4   4   18.40    2.60
   4   4  -4   27.70    6.30
  -3  -4   3  217.68    8.50
   3   4  -3  172.68    8.30
   3   4  -3  174.28   11.10
  -2  -4   2  567.14   21.30
   2   4  -2  580.34   23.20
   2   4  -2  565.34   21.40
  -1  -4   1 1105.19   41.20
   1   4  -1 1248.08   42.10
   1   4  -1 1087.99   41.30
   0  -4   0 9886.31  344.27
   0   4   0 9576.04  343.67
   0   4   0 9473.55  342.97
   1  -4  -1 3314.27  119.29
  -1   4   1 3376.66  120.29
  -1   4   1 3320.77  118.29
   2  -4  -2    0.60    2.80
   2  -4  -2    0.50    0.80
  -2   4   2    0.30    0.90
   3  -4  -3  439.86   16.20
   3  -4  -3  436.46   20.90
   3  -4  -3  430.66   16.30
  -3   4   3  437.16   16.60
   4  -4  -4   13.10    6.50
   5  -4  -5   13.80    7.10
   5  -4  -5   12.70    1.60
   6  -4  -6    1.10    6.90
   7  -4  -7    8.90    9.10
   8  -4  -8    6.50    9.50
   9   3  -8   10.60    9.30
   8   3  -7   17.70    9.40
  -7  -3   6   -0.30    2.10
   7   3  -6   -5.90    6.60
  -6  -3   5  168.98    8.60
   6   3  -5  157.28   13.90
  -5  -3   4  231.28   10.40
   5   3  -4  240.18   15.60
  -4  -3   3  437.46   17.10
   4   3  -3  439.56   17.10
   4   3  -3  448.06   20.60
  -3  -3   2  899.31   32.80
   3   3  -2  896.31   35.00
   3   3  -2  913.21   32.90
  -2  -3   1 1448.76   51.39
   2   3  -1 1441.36   52.29
   2   3  -1 1435.16   51.39
  -1  -3   0    0.60    0.40
   1   3   0    0.00    0.40
   1   3   0    1.20    0.50
   0  -3  -1    4.10    0.70
   0   3   1    3.90    1.20
   0   3   1    3.60    0.70
   1  -3  -2   22.90    1.50
   1  -3  -2   19.40    3.60
  -1   3   2   18.90    1.70
   2  -3  -3   31.00    5.60
   2  -3  -3   33.40    1.60
   2  -3  -3   28.30    1.70
   3  -3  -4  457.65   23.40
   4  -3  -5  104.49   11.70
   5  -3  -6    6.70    6.40
   6  -3  -7   14.30    9.10
   7  -3  -8   -5.10    7.30
   8  -3  -9    5.20    9.70
  10   2  -8   17.60   10.60
   9   2  -7    6.90    8.90
  -8  -2   6    1.60    2.30
   8   2  -6    3.70    6.50
  -7  -2   5    2.30    2.10
   7   2  -5    4.90    6.30
  -6  -2   4  221.18   10.00
   6   2  -4  201.98   15.00
  -5  -2   3  932.31   34.00
   5   2  -3  905.41   37.80
   5   2  -3  924.81   33.80
  -4  -2   2    0.10    1.00
   4   2  -2   -0.90    2.10
   4   2  -2   -0.20    0.90
  -3  -2   1 2729.43  100.39
   3   2  -1 2891.11  101.09
   3   2  -1 2860.21   99.89
  -2  -2   0   11.10    1.00
   2   2   0   14.00    1.20
   2   2   0   13.00    1.10
  -1  -2  -1  490.05   17.70
   1   2   1  496.65   18.30
   1   2   1  504.55   17.70
   0  -2  -2   54.69    5.20
   1  -2  -3  569.64   24.60
  -1   2   3  570.44   20.50
   3  -2  -5  208.48   15.50
  -3   2   5  203.88    8.80
   4  -2  -6  185.18   16.00
  -4   2   6  184.98    8.60
   5  -2  -7   -0.20    7.60
   6  -2  -8   -0.80    7.90
   7  -2  -9    3.90    9.90
  11   1  -8   12.50    8.70
  10   1  -7   15.70    8.70
  -9  -1   6   -1.70    2.20
   9   1  -6   -4.90    7.50
  -8  -1   5   52.89    5.20
   8   1  -5   41.50    9.80
  -7  -1   4   39.30    4.00
   7   1  -4   46.80    8.40
  -6  -1   3  240.38   10.50
   6   1  -3  239.98   10.20
   6   1  -3  252.07   14.60
  -5  -1   2 1427.06   52.29
   5   1  -2 1457.25   55.09
   5   1  -2 1471.65   52.19
  -4  -1   1 3341.67  121.19
   4   1  -1 3479.75  121.69
   4   1  -1 3413.86  121.79
  -3  -1   0   -0.50    0.30
  -3  -1   0    0.20    0.50
   3   1   0   -0.30    0.50
   3   1   0    0.90    0.70
  -2  -1  -1 1000.70   35.90
   2   1   1 1006.20   36.30
   2   1   1 1040.20   35.90
   2   1   1 1003.00   35.90
  -1  -1  -2 3172.38  113.39
   0  -1  -3 1578.94   60.39
   0   1   3 1630.54   56.49
   1  -1  -4  157.78   11.40
  -1   1   4  127.09    5.50
   2  -1  -5  174.98   13.70
  -2   1   5  174.58    7.40
   3  -1  -6  -11.50    5.20
  -3   1   6   -1.40    1.40
   4  -1  -7   48.30   11.10
  -4   1   7   41.20    3.90
   5  -1  -8    6.80    9.10
   6  -1  -9   -1.80    8.30
  12   0  -8   -8.30    8.60
  11   0  -7    3.10    9.20
  10   0  -6   53.39   11.40
  -9   0   5  193.48   10.00
   9   0  -5  159.48   15.20
  -8   0   4   44.80    4.60
   8   0  -4   57.19    9.10
  -7   0   3  147.09    7.50
   7   0  -3  141.79   10.90
   7   0  -3  140.49    6.90
   6   0  -2  216.88   12.00
  -5   0   1  312.77   12.30
   5   0  -1  300.47   12.10
   5   0  -1  306.17   13.60
  -4   0   0 9999.00  345.17
  -4   0   0 9618.64  343.37
   4   0   0 9570.94  344.17
   4   0   0 9503.95  343.07
  -2   0  -2   34.90    3.40
   2   0   2   38.20    2.20
  -1   0  -3 1841.22   64.59
   1   0   3 1633.34   61.09
   0   0  -4  627.34   27.80
   0   0   4  626.24   22.60
   1   0  -5    7.50    5.40
   2   0  -6   48.50   10.00
  -2   0   6   49.40    3.50
   3   0  -7   31.30    9.20
  -3   0   7   39.10    3.80
   4   0  -8    5.10    8.70
   5   0  -9   -1.00    9.80
  13  -1  -8    2.90    9.40
  12  -1  -7    0.00    8.70
  11  -1  -6   19.90   10.00
 -10   1   5   22.60    4.00
  10  -1  -5   23.90    8.20
  -9   1   4  717.33   28.20
   9  -1  -4  697.03   34.30
  -8   1   3  301.57   13.70
   8  -1  -3  300.47   17.60
   8  -1  -3  320.97   13.70
  -7   1   2    5.90    2.00
   7  -1  -2    5.10    1.50
  -6   1   1  125.59    6.30
   6  -1  -1  122.29    6.00
   6  -1  -1  111.69    7.40
   5  -1   0   -2.90    1.00
   5  -1   0    0.60    1.20
   5  -1   0   -1.90    1.40
  -4   1  -1 1201.58   39.40
   4  -1   1 1081.19   40.20
   4  -1   1 1058.49   39.30
  -3   1  -2   69.09    4.10
  -3   1  -2   61.39    3.30
   3  -1   2   65.49    3.50
  -2   1  -3  335.37   12.50
  -2   1  -3  331.87   15.10
   2  -1   3  329.97   12.70
  -1   1  -4  121.29    9.60
   1  -1   4  134.89    5.70
   0   1  -5   22.40    6.50
   0  -1   5   20.00    2.00
   1   1  -6    5.10    6.00
   2   1  -7    6.50    7.00
  -2  -1   7    8.60    2.10
   3   1  -8   -0.30    8.10
   4   1  -9   -3.30    8.40
  13  -2  -7    5.10    8.90
  12  -2  -6   -3.50    7.10
 -11   2   5   38.20    5.30
  11  -2  -5   36.60   10.50
 -10   2   4   82.39    7.10
  10  -2  -4   83.39   12.10
  -9   2   3   83.89    6.90
   9  -2  -3   72.49    6.30
   9  -2  -3   71.39   10.40
  -8   2   2  209.68   10.20
   8  -2  -2  204.48   12.90
   8  -2  -2  199.58    9.90
   8  -2  -2  198.98    9.30
   7  -2  -1  412.86   17.40
   7  -2  -1  385.76   15.50
   7  -2  -1  337.87   15.10
   6  -2   0   80.59    5.20
   6  -2   0   78.39    4.60
   6  -2   0   75.49    4.70
  -5   2  -1   77.49    4.50
  -5   2  -1   84.89    3.40
   5  -2   1   76.29    4.60
   5  -2   1   85.49    3.80
  -4   2  -2  567.74   24.40
  -4   2  -2  708.03   24.70
   4  -2   2  715.33   24.80
  -3   2  -3  557.84   20.50
  -3   2  -3  530.45   22.20
   3  -2   3  548.95   20.60
  -2   2  -4   32.60    5.50
  -1   2  -5   29.50    6.80
   1  -2   5   28.80    2.60
   0   2  -6   52.39    9.50
   0  -2   6   56.29    3.60
   1   2  -7   20.90    8.20
  -1  -2   7   25.10    2.80
   2   2  -8    0.40    7.40
   3   2  -9    3.40    9.90
  14  -3  -7    6.00   10.30
  13  -3  -6   -7.30    7.00
  12  -3  -5    5.20    7.10
  11  -3  -4    6.60    6.50
  10  -3  -3  168.08    9.90
  10  -3  -3  168.28   14.80
   9  -3  -2   -1.80    4.00
   9  -3  -2    4.20    2.00
   9  -3  -2    2.30    2.30
   8  -3  -1  433.06   17.50
   8  -3  -1  433.26   19.70
   8  -3  -1  419.96   17.80
  -7   3   0    3.20    1.50
   7  -3   0    1.00    1.40
   7  -3   0   -1.10    1.30
  -6   3  -1  456.35   16.50
  -6   3  -1  447.76   17.80
   6  -3   1  438.16   17.80
  -5   3  -2   77.19    4.20
  -5   3  -2   76.39    4.70
   5  -3   2   68.99    4.60
  -4   3  -3  289.07   13.10
  -3   3  -4  443.26   20.20
   3  -3   4  440.56   17.30
  -2   3  -5   42.50    7.60
   2  -3   5   49.30    3.80
  -1   3  -6    3.00    5.40
   1  -3   6    2.10    1.40
   0   3  -7   29.70    8.80
   0  -3   7   36.30    3.30
   1   3  -8   31.70   10.20
   2   3  -9    7.20    9.90
  15  -4  -7    1.00    8.50
  14  -4  -6   36.80   12.70
  13  -4  -5   -0.70    7.40
  12  -4  -4   22.50    8.10
  11  -4  -3   89.89   11.40
  10  -4  -2    7.00    3.10
  10  -4  -2   -0.60    5.10
   9  -4  -1   60.89    5.80
   9  -4  -1   53.49    6.90
   9  -4  -1   42.40    4.50
  -8   4   0 1025.00   38.20
   8  -4   0 1032.20   39.10
   8  -4   0 1043.80   38.90
  -7   4  -1 1063.49   37.80
  -7   4  -1 1023.30   39.30
   7  -4   1 1057.99   39.50
  -6   4  -2   21.10    2.70
   6  -4   2   20.20    2.80
  -5   4  -3  251.27   11.70
  -5   4  -3  238.88   10.90
   5  -4   3  247.78   11.10
  -4   4  -4   13.80    4.20
   4  -4   4   12.90    2.30
  -3   4  -5   36.90    6.70
   3  -4   5   37.90    3.80
  -2   4  -6   -5.80    4.70
   2  -4   6   -0.50    1.40
  -1   4  -7   -3.20    6.30
   1  -4   7    4.30    2.00
   0   4  -8    7.60    7.80
   1   4  -9    4.20    8.90
  15  -5  -6   22.70   11.10
  14  -5  -5   14.80    9.20
  13  -5  -4   14.60    7.80
  11  -5  -2   39.80    7.60
  11  -5  -2   47.50    5.80
 -10   5   1   17.10    3.90
  10  -5  -1   21.40    3.90
  10  -5  -1   22.80    4.50
  -9   5   0   10.70    2.70
  -8   5  -1   28.80    2.50
  -8   5  -1   27.70    3.60
   8  -5   1   23.20    3.50
  -7   5  -2  417.46   16.70
  -7   5  -2  428.76   17.80
   7  -5   2  429.86   17.90
  -6   5  -3  100.99    6.60
   6  -5   3  102.89    6.50
  -5   5  -4   64.99    7.30
  -4   5  -5   41.90    6.80
   4  -5   5   35.50    3.80
  -3   5  -6   -1.10    4.80
   3  -5   6    1.00    1.60
  -2   5  -7    6.60    6.60
  -1   5  -8    7.90    7.60
   0   5  -9    4.30    8.30
  16  -6  -6    7.30   10.40
  15  -6  -5    5.40    8.80
  14  -6  -4   19.80    9.60
  13  -6  -3   65.59   11.00
 -12   6   2   27.10    4.90
 -11   6   1  398.36   17.90
  11  -6  -1  398.06   18.30
 -10   6   0  231.68   11.80
 -10   6   0  240.48   10.80
  10  -6   0  204.28   11.60
  10  -6   0  222.88   12.10
  -9   6  -1  110.69    7.70
  -9   6  -1  116.39    5.90
   9  -6   1  127.29    8.00
  -8   6  -2  279.97   12.50
  -8   6  -2  326.77   14.30
   8  -6   2  302.17   14.10
  -7   6  -3   21.40    3.70
   7  -6   3   17.90    3.30
  -6   6  -4    5.10    3.40
   6  -6   4   -2.30    1.90
  -5   6  -5   40.20    6.60
   5  -6   5   40.00    4.30
  -4   6  -6   83.79   10.70
   4  -6   6   88.09    6.10
  -3   6  -7   14.50    7.10
  -2   6  -8   -2.50    6.50
  -1   6  -9   -1.80    7.90
 -17   7   6    3.70    6.30
 -16   7   5    9.00    6.30
 -15   7   4   -3.50    5.00
 -14   7   3   15.30    5.60
 -13   7   2  477.85   22.00
 -12   7   1  353.06   16.60
  12  -7  -1  363.06   19.40
 -11   7   0    0.10    2.30
  11  -7   0   -1.60    2.60
  11  -7   0   -3.00    2.30
 -10   7  -1   -2.70    2.30
 -10   7  -1    2.60    1.70
  10  -7   1   -2.90    2.70
  -9   7  -2   74.19    5.10
   9  -7   2   77.29    6.80
  -8   7  -3   17.80    3.40
   8  -7   3   16.80    3.50
   7  -7   4   70.89    6.30
  -6   7  -5    6.90    4.30
   6  -7   5    9.90    2.70
  -5   7  -6   10.10    5.10
   5  -7   6    0.30    2.20
  -4   7  -7   54.39   10.10
  -3   7  -8   15.00    7.70
 -17   8   5    5.90    6.10
 -16   8   4   13.80    6.10
 -15   8   3    7.60    5.00
 -14   8   2    1.60    3.60
 -13   8   1  178.48   10.60
 -12   8   0  631.04   24.90
  12  -8   0  601.94   26.40
 -11   8  -1  252.77   11.30
  11  -8   1  248.48   13.50
 -10   8  -2   38.60    4.20
  10  -8   2   52.19    6.10
  -9   8  -3   75.99    6.40
  -8   8  -4  111.49    8.70
   8  -8   4  107.79    7.90
  -7   8  -5   17.70    5.00
   7  -8   5   14.30    3.20
  -6   8  -6   19.90    6.30
  -5   8  -7   20.60    9.80
 -17   9   4   13.10    6.00
 -16   9   3    6.90    5.10
 -15   9   2   -4.50    3.40
 -14   9   1    9.30    3.80
 -13   9   0   -0.10    2.40
 -12   9  -1   87.29    5.70
  12  -9   1   88.99    8.00
 -11   9  -2   21.50    3.50
  11  -9   2   37.40    5.60
  10  -9   3   39.00    5.30
  -9   9  -4    3.30    2.80
   9  -9   4    2.10    2.70
   8  -9   5   13.00    3.40
 -18  10   4    9.00    5.70
 -17  10   3    0.00    4.80
 -16  10   2   27.80    6.10
 -15  10   1    1.50    3.50
 -14  10   0    2.20    2.60
 -13  10  -1    6.20    2.50
  12 -10   2  136.89   10.10
  11 -10   3   83.09    7.90
  10 -10   4    6.10    3.20
 -18  11   3   17.30    6.50
 -17  11   2    6.30    5.00
  12 -11   3   84.19    8.30
  11 -11   4  148.89   10.60
 -11  19  -2   46.90    8.70
 -12  19  -1    7.70    5.50
 -13  19   0    4.40    4.70
  -7  18  -5    9.90   11.60
  -8  18  -4    6.70    6.80
  -9  18  -3    8.60    6.00
 -10  18  -2    1.70    5.00
 -11  18  -1   18.70    5.70
 -12  18   0   23.10    5.60
 -13  18   1   -3.10    3.90
  -5  17  -6   -6.70    6.40
  -6  17  -5    7.20    6.80
  -7  17  -4   38.70    9.10
  -8  17  -3   12.40    6.20
  -9  17  -2    7.60    4.90
 -10  17  -1   29.90    6.10
 -11  17   0   -1.70    3.00
 -12  17   1   10.10    4.80
 -13  17   2    2.70    4.50
  -4  16  -6    2.70    6.90
  -5  16  -5    3.90    6.60
  -6  16  -4   18.90    6.80
  -7  16  -3    6.60    4.80
  -8  16  -2    4.60    4.30
  -9  16  -1   -1.10    3.40
 -10  16   0    3.30    3.60
 -11  16   1    9.70    4.50
 -12  16   2   20.40    5.20
 -13  16   3    2.50    4.40
  -2  15  -7    1.90    7.60
  -3  15  -6    0.70    7.00
  -4  15  -5   10.10    6.80
   5 -15   4    4.00    3.10
  -5  15  -4   -3.40    4.90
  -6  15  -3    5.20    4.70
  -7  15  -2   13.90    4.80
  -8  15  -1   43.70    5.80
  -9  15   0   -0.40    2.80
 -10  15   1   31.60    5.60
 -11  15   2   17.30    5.20
 -12  15   3   18.60    5.40
 -13  15   4   11.40    5.50
  -1  14  -7    7.90    8.40
  -2  14  -6   24.80    8.70
   3 -14   5   40.90    8.20
  -3  14  -5   33.10    8.70
   4 -14   4   46.80    5.90
  -4  14  -4   29.30    7.40
   5 -14   3   43.30    5.70
  -5  14  -3   55.39    8.10
   6 -14   2    3.60    3.10
  -6  14  -2    9.10    4.30
  -7  14  -1   31.90    5.00
  -8  14   0  229.78   12.20
  -9  14   1  143.99    9.40
 -10  14   2   -6.10    3.30
 -11  14   3   10.80    5.00
 -12  14   4    2.90    4.60
 -13  14   5   -1.40    4.80
   1  13  -8   -1.10    8.60
   0  13  -7   10.70    8.80
  -1  13  -6    3.10    7.10
   2 -13   5   55.39    6.00
  -2  13  -5   44.80    9.50
   3 -13   4   49.70    6.00
  -3  13  -4   40.40    8.00
   4 -13   3    5.50    3.00
  -4  13  -3   -2.40    4.20
   5 -13   2   74.69    6.70
  -5  13  -2   69.59    7.20
   6 -13   1   33.70    4.90
  -6  13  -1   21.00    4.20
  -6  13  -1   25.60    4.50
  -7  13   0    0.60    2.30
  -8  13   1   30.10    4.80
  -9  13   2  124.79    9.20
 -10  13   3   12.70    5.10
 -11  13   4    3.10    5.10
 -12  13   5    3.50    5.40
 -13  13   6   -0.50    4.70
   2  12  -8   11.60    8.70
   1  12  -7    5.20    8.40
   0  12  -6   28.00    9.30
   1 -12   5   37.00    4.70
  -1  12  -5   33.90    8.80
   2 -12   4    2.80    2.40
  -2  12  -4   -6.40    4.10
   3 -12   3   37.20    4.90
  -3  12  -3   38.70    6.90
   4 -12   2    2.60    2.60
  -4  12  -2    5.40    3.50
   5 -12   1    6.70    2.80
  -5  12  -1    4.50    2.50
   6 -12   0   29.20    4.60
  -6  12   0   20.60    3.90
  -6  12   0   21.70    4.40
  -7  12   1    4.70    3.30
  -8  12   2   19.40    4.30
  -9  12   3   24.60    5.80
 -10  12   4   23.40    6.30
 -11  12   5   12.50    6.10
 -12  12   6    2.10    5.70
   3  11  -8    1.20    7.80
   2  11  -7    1.10    7.00
   1  11  -6   11.70    6.80
   0 -11   5    2.40    2.40
   0  11  -5    5.10    5.90
   1 -11   4   10.70    2.90
  -1  11  -4    7.10    5.10
   2 -11   3   21.90    3.80
  -2  11  -3   17.00    4.90
   3 -11   2  890.01   35.20
  -3  11  -2  899.91   35.70
  -3  11  -2  906.71   35.70
   4 -11   1  285.57   13.80
  -4  11  -1  290.67   13.20
  -4  11  -1  297.67   14.30
   5 -11   0   -1.80    2.00
  -5  11   0   -0.50    2.10
  -5  11   0   -0.40    2.60
   6 -11  -1  188.38   10.10
  -6  11   1  185.38   10.80
  -6  11   1  182.48   10.00
  -7  11   2  221.08   12.20
  -8  11   3   -5.90    3.30
  -9  11   4   23.70    5.60
 -10  11   5   79.69    9.30
 -11  11   6    6.10    5.50
 -12  11   7    3.00    5.80
   4  10  -8   -2.80    8.90
   3  10  -7    1.90    7.70
  -2 -10   6   44.60    6.30
   2  10  -6   41.40   10.00
  -1 -10   5   18.70    3.30
   1  10  -5   22.40    6.90
   0 -10   4   16.50    3.10
   0  10  -4    9.50    5.20
  -1  10  -3    3.60    4.60
   2 -10   2    4.50    2.50
  -2  10  -2    6.40    2.80
  -2  10  -2    9.30    3.40
   3 -10   1 1377.46   50.19
  -3  10  -1 1319.47   50.49
  -3  10  -1 1322.17   49.70
   4 -10   0 1153.38   44.40
  -4  10   0 1217.38   44.00
  -4  10   0 1164.98   44.80
   5 -10  -1  101.89    6.90
  -5  10   1  119.69    7.40
  -5  10   1  101.69    7.20
   6 -10  -2  100.99    6.50
  -6  10   2   76.19    6.50
  -6  10   2   83.09    7.50
  -7  10   3  213.38   12.50
  -8  10   4   40.40    7.00
  -9  10   5   15.80    5.80
 -10  10   6   49.00    8.30
 -11  10   7    6.10    6.00
   5   9  -8   12.60    9.70
   4   9  -7   18.30    8.60
  -3  -9   6    1.30    2.00
   3   9  -6   -4.70    6.40
  -2  -9   5  114.29    7.10
   2   9  -5  113.79   12.50
  -1  -9   4  726.73   27.90
   1   9  -4  693.43   31.90
   0  -9   3  691.73   26.80
   0   9  -3  668.13   29.40
   1  -9   2  545.35   21.10
  -1   9  -2  511.45   21.30
  -1   9  -2  500.65   21.90
   2  -9   1  848.02   32.70
  -2   9  -1  860.11   32.50
  -2   9  -1  855.51   33.00
   3  -9   0   -1.90    1.50
  -3   9   0   -1.10    1.40
  -3   9   0   -0.30    1.70
   4  -9  -1  573.74   22.90
  -4   9   1  573.14   23.10
  -4   9   1  579.84   23.10
   5  -9  -2   81.29    5.50
  -5   9   2   83.99    6.50
  -5   9   2   82.19    6.10
   6  -9  -3   68.89    5.40
  -6   9   3   68.09    5.80
  -6   9   3   84.59    7.40
  -7   9   4   -4.60    3.20
  -8   9   5   17.20    6.10
  -9   9   6    5.30    5.60
 -10   9   7    6.50    5.50
   6   8  -8   -9.80    7.90
   5   8  -7    8.80    8.00
  -4  -8   6    6.20    2.50
   4   8  -6    7.20    6.40
  -3  -8   5   51.69    4.80
   3   8  -5   56.19    9.20
  -2  -8   4    2.10    1.90
   2   8  -4    0.40    4.30
  -1  -8   3  314.37   13.40
   1   8  -3  307.87   13.70
   1   8  -3  295.97   15.70
   0  -8   2  831.22   30.60
   0   8  -2  818.02   31.90
   0   8  -2  763.02   30.60
   1  -8   1  690.43   26.60
  -1   8  -1  673.03   26.80
  -1   8  -1  716.63   26.80
   2  -8   0 2100.89   76.29
  -2   8   0 2115.79   75.99
  -2   8   0 2130.69   76.59
   3  -8  -1  374.96   15.30
  -3   8   1  373.26   15.60
  -3   8   1  363.86   15.50
   4  -8  -2  407.56   16.50
  -4   8   2  411.86   17.00
  -4   8   2  405.66   17.70
   5  -8  -3   65.79    4.70
  -5   8   3   70.29    6.60
  -5   8   3   67.89    5.30
  -6   8   4  142.79   10.20
  -6   8   4  146.89    8.00
   7  -8  -5   12.00    7.50
  -7   8   5   17.90    5.50
   8  -8  -6   10.20    9.10
   9  -8  -7   -4.30    8.30
  10  -8  -8    1.00   10.10
   7   7  -8    1.30    7.70
   6   7  -7    6.10    7.40
  -5  -7   6    2.00    2.10
   5   7  -6   -1.20    5.90
  -4  -7   5   33.70    3.80
   4   7  -5   28.20    7.40
  -3  -7   4   29.10    3.30
   3   7  -4   31.90    6.90
  -2  -7   3  274.97   11.90
   2   7  -3  265.47   14.50
   2   7  -3  292.27   12.40
  -1  -7   2    2.70    1.40
   1   7  -2    3.70    1.70
   1   7  -2    3.70    2.40
   0  -7   1  967.40   35.30
   0   7  -1  947.91   35.60
   0   7  -1  939.71   35.40
   1  -7   0   -0.90    1.00
  -1   7   0    0.50    1.10
  -1   7   0   -1.30    1.00
   2  -7  -1  184.38    8.50
  -2   7   1  193.98    8.80
  -2   7   1  194.38    8.90
   3  -7  -2   62.79    4.00
  -3   7   2   61.49    5.10
  -3   7   2   67.69    4.40
   4  -7  -3  266.77   11.00
  -4   7   3  259.37   11.50
  -4   7   3  254.37   13.40
   5  -7  -4  302.47   19.00
   5  -7  -4  255.27   11.10
  -5   7   4  270.07   11.80
   6  -7  -5   -6.00    6.00
   7  -7  -6    0.40    7.00
   8  -7  -7   -1.30    8.40
   9  -7  -8    8.50    9.60
   8   6  -8    1.80    7.90
   7   6  -7   14.10    9.20
  -6  -6   6   49.80    5.10
   6   6  -6   47.50   10.50
  -5  -6   5    9.10    2.50
   5   6  -5    8.90    6.40
  -4  -6   4  230.68   11.10
   4   6  -4  284.47   16.20
  -3  -6   3  171.08    8.00
   3   6  -3  171.88    8.30
   3   6  -3  164.28   10.60
  -2  -6   2   32.50    2.90
   2   6  -2   37.10    3.10
   2   6  -2   33.60    4.30
  -1  -6   1  122.69    5.90
   1   6  -1  117.29    5.90
   1   6  -1  119.79    6.40
   0  -6   0 3721.53  128.99
   0   6   0 3473.85  128.99
   0   6   0 3737.23  130.79
   1  -6  -1 1160.78   40.60
  -1   6   1 1097.19   41.00
  -1   6   1 1096.29   40.70
   2  -6  -2  110.29    5.20
  -2   6   2  110.09    5.50
  -2   6   2  109.99    6.50
   3  -6  -3    0.20    4.20
   3  -6  -3    0.40    1.30
   3  -6  -3    4.70    1.30
  -3   6   3    4.20    1.50
  -3   6   3   -1.30    2.80
   4  -6  -4    5.90    1.40
   4  -6  -4    8.20    5.70
   5  -6  -5   49.50    9.60
   6  -6  -6   39.90   10.00
   7  -6  -7    8.50    8.10
   8  -6  -8   -0.30    9.50
   9   5  -8    4.80    7.90
   8   5  -7   12.70    9.10
  -7  -5   6   -0.50    2.10
   7   5  -6    0.20    6.10
  -6  -5   5   50.09    4.90
   6   5  -5   54.49   10.30
  -5  -5   4   62.89    5.10
   5   5  -4   81.89    9.40
  -4  -5   3  245.98   10.40
   4   5  -3  231.48   13.50
   4   5  -3  236.88   10.40
  -3  -5   2   73.69    4.20
   3   5  -2   75.59    5.80
   3   5  -2   69.09    4.20
  -2  -5   1   96.99    4.60
   2   5  -1   83.09    5.20
   2   5  -1   89.69    4.60
  -1  -5   0   -0.90    0.80
   1   5   0   -2.30    0.70
   1   5   0   -1.90    0.90
   0  -5  -1  319.07   12.60
   0   5   1  314.57   13.10
   0   5   1  360.16   12.90
   1  -5  -2 1680.63   55.99
  -1   5   2 1586.24   56.29
  -1   5   2 1448.16   57.29
   2  -5  -3  887.21   31.00
   2  -5  -3  761.02   30.80
   2  -5  -3  931.71   36.40
  -2   5   3  882.81   31.50
   3  -5  -4  230.08   15.20
   4  -5  -5   45.30    9.30
   5  -5  -6    8.80    7.00
   6  -5  -7   -4.00    7.90
   7  -5  -8   -1.90    9.00
   8  -5  -9   -7.80    7.90
  10   4  -8    5.10    9.00
   9   4  -7    7.70    8.70
  -8  -4   6   57.09    5.70
   8   4  -6   69.79   11.90
  -7  -4   5  131.59    7.70
   7   4  -5  123.19   12.80
  -6  -4   4   11.80    2.60
  -5  -4   3   43.50    3.60
   5   4  -3   40.80    3.50
   5   4  -3   37.10    5.80
  -4  -4   2  123.49    6.00
   4   4  -2  118.29    7.80
   4   4  -2  130.99    6.10
  -3  -4   1  782.32   28.10
   3   4  -1  770.82   29.20
   3   4  -1  749.23   28.10
  -2  -4   0  869.41   31.50
   2   4   0  904.51   31.60
   2   4   0  839.82   31.60
  -1  -4  -1 1243.28   43.40
   1   4   1 1284.27   43.50
   1   4   1 1127.09   43.80
   0  -4  -2 1553.24   60.19
   0   4   2 1808.52   60.49
   0   4   2 1766.52   61.89
   1  -4  -3  128.29    9.10
  -1   4   3  117.59    5.20
   2  -4  -4  259.17   15.70
   3  -4  -5   15.90    6.70
   4  -4  -6   -0.60    5.90
   5  -4  -7    0.40    7.30
   6  -4  -8   -0.30    9.10
   7  -4  -9   12.00    9.90
  11   3  -8    1.20    8.00
  10   3  -7    6.80    7.60
  -9  -3   6    3.50    2.70
   9   3  -6   -4.70    7.10
   8   3  -5    9.50    7.00
  -7  -3   4  441.16   17.60
   7   3  -4  390.26   22.20
  -6  -3   3    1.40    1.50
   6   3  -3    0.40    3.90
   6   3  -3    0.20    1.30
  -5  -3   2 1130.09   41.40
   5   3  -2 1120.99   43.90
   5   3  -2 1159.88   41.40
  -4  -3   1  345.87   13.80
   4   3  -1  379.46   15.20
   4   3  -1  355.76   13.80
  -2  -3  -1 1427.06   50.49
   2   3   1 1429.16   50.79
   2   3   1 1424.56   50.59
  -1  -3  -2   61.09    5.30
   1   3   2   63.99    2.70
   0  -3  -3  453.55   20.50
   1  -3  -4   12.20    5.10
   2  -3  -5   47.20    9.00
   3  -3  -6    8.20    6.70
   4  -3  -7   51.29   11.50
   5  -3  -8    1.90    8.80
   6  -3  -9   -0.70    9.50
  12   2  -8   -5.40    9.10
  11   2  -7    9.60    9.80
  10   2  -6   -2.00    6.60
  -9  -2   5    4.60    2.60
   9   2  -5   -0.70    5.70
  -8  -2   4  163.18    9.00
   8   2  -4  181.08   14.10
  -7  -2   3    4.70    2.10
   7   2  -3    2.00    3.90
   7   2  -3    5.50    1.70
  -6  -2   2  114.09    5.80
   6   2  -2  111.49    7.90
   6   2  -2  108.59    5.50
  -5  -2   1  225.28    9.60
   5   2  -1  240.78    9.60
  -4  -2   0 7876.31  289.77
   4   2   0 8228.98  289.77
   4   2   0 8297.17  291.37
  -3  -2  -1 2867.11  100.59
  -3  -2  -1 2841.32  101.79
   3   2   1 2911.41  101.69
   3   2   1 2790.32  101.59
  -2  -2  -2  211.98    9.80
   2   2   2  208.88    7.80
  -1  -2  -3  338.07   16.00
   0  -2  -4  115.39    9.60
   1  -2  -5   20.80    6.50
  -1   2   5   27.60    2.30
   2  -2  -6   88.29   11.80
  -2   2   6   95.69    4.80
   3  -2  -7   62.29   11.80
   4  -2  -8    8.30    9.40
   5  -2  -9    2.90    9.10
  13   1  -8   11.30   10.30
  12   1  -7    2.40    8.20
  11   1  -6   -5.70    7.50
 -10  -1   5   14.10    3.40
  10   1  -5   24.50    7.90
  -9  -1   4  240.98   12.50
   9   1  -4  325.47   19.50
  -8  -1   3   13.00    2.80
   8   1  -3   13.10    5.80
  -7  -1   2  151.18    7.50
   7   1  -2  156.78    9.90
   7   1  -2  142.09    7.10
  -6  -1   1 1090.69   40.60
   6   1  -1 1115.89   42.10
   6   1  -1 1123.69   40.50
  -5  -1   0   -3.30    1.20
   5   1   0   -3.10    1.00
   5   1   0   -2.70    1.40
  -4  -1  -1 3287.77  119.09
  -4  -1  -1 3449.65  119.29
   4   1   1 3469.45  119.19
   4   1   1 3302.87  119.09
  -3  -1  -2   19.50    2.60
   3   1   2   29.90    2.00
  -2  -1  -3  586.84   24.00
   2   1   3  580.84   21.00
  -1  -1  -4  138.19   10.20
   0  -1  -5   14.70    5.80
   0   1   5   16.40    1.50
   1  -1  -6   -2.10    5.50
  -1   1   6   -0.50    1.10
   2  -1  -7   16.10    8.30
  -2   1   7   24.00    2.50
   3  -1  -8   32.70   10.80
   4  -1  -9    6.20    9.20
  13   0  -7   10.40   10.20
  12   0  -6   22.80    9.70
 -11   0   5    3.10    3.10
  11   0  -5    3.00    7.50
 -10   0   4   13.80    3.60
  10   0  -4   13.90    7.10
  -9   0   3  662.43   26.30
   9   0  -3  657.43   30.80
  -8   0   2  797.52   30.40
   8   0  -2  793.12   30.00
   8   0  -2  791.22   33.30
  -7   0   1  919.91   34.10
   7   0  -1  920.41   35.60
   7   0  -1  891.81   33.70
  -6   0   0 3670.13  129.29
   6   0   0 3654.13  129.49
   6   0   0 3607.24  129.09
   5   0   1  297.47   11.90
  -4   0  -2 1732.03   64.79
   4   0   2 1938.71   64.59
   4   0   2 1781.92   64.69
  -3   0  -3  425.06   17.90
   3   0   3  422.06   15.80
  -2   0  -4  114.59    9.00
   2   0   4  124.79    5.20
  -1   0  -5   20.70    6.00
   1   0   5   19.10    1.70
   0   0  -6    4.50    5.50
   0   0   6    0.10    1.00
   1   0  -7    3.50    7.00
  -1   0   7    3.10    1.40
   2   0  -8    6.30    7.60
   3   0  -9   -3.90    8.70
  14  -1  -7    4.40    9.80
  13  -1  -6    0.60    8.70
 -12   1   5   40.00    5.60
  12  -1  -5   42.90   11.10
 -11   1   4   16.70    4.00
  11  -1  -4   15.50    7.10
 -10   1   3  690.23   27.90
  10  -1  -3  719.03   27.90
  10  -1  -3  666.43   32.20
  -9   1   2    5.50    2.90
   9  -1  -2    9.30    3.00
   9  -1  -2    7.80    2.20
   9  -1  -2    7.40    4.60
  -8   1   1  129.59    7.20
   8  -1  -1  128.09    6.60
   8  -1  -1  107.89    8.10
   7  -1   0    0.70    1.50
   7  -1   0    2.80    1.50
   7  -1   0    0.30    1.10
  -6   1  -1  113.09    4.80
  -6   1  -1  115.49    4.30
   6  -1   1  113.89    5.80
   6  -1   1  112.09    5.80
  -5   1  -2  641.84   23.00
   5  -1   2  635.34   22.40
   5  -1   2  605.84   23.60
  -4   1  -3  104.59    6.40
   4  -1   3   99.59    5.10
  -3   1  -4 1362.16   52.29
   3  -1   4 1362.56   49.00
  -2   1  -5  209.28   13.70
   2  -1   5  193.78    8.20
  -1   1  -6    3.00    5.20
   1  -1   6    0.30    1.00
   0   1  -7   10.20    6.80
   1   1  -8    3.20    7.70
   2   1  -9    5.80    9.10
  15  -2  -7    3.50    9.00
  14  -2  -6   -6.50    6.90
  13  -2  -5   13.60    8.60
  12  -2  -4   68.49   11.10
  11  -2  -3   24.90    7.60
  10  -2  -2  170.88   12.90
  10  -2  -2  174.28    9.80
  10  -2  -2  178.68    9.80
   9  -2  -1   94.59    6.50
   9  -2  -1   91.29    7.80
   9  -2  -1   99.59    6.10
   8  -2   0   12.70    2.60
   8  -2   0   16.30    3.20
   8  -2   0   15.20    2.80
  -7   2  -1  217.38    8.30
   7  -2   1  222.98   10.00
   7  -2   1  215.78    9.90
  -6   2  -2   41.00    2.60
   6  -2   2   45.40    3.70
  -5   2  -3  271.07   11.70
   5  -2   3  248.88   11.00
  -4   2  -4   28.90    4.70
   4  -2   4   29.10    3.00
  -3   2  -5  210.38   13.70
   3  -2   5  217.88    9.30
  -2   2  -6   92.49   10.70
   2  -2   6   88.49    4.80
  -1   2  -7   10.60    7.00
   1  -2   7   13.90    2.10
   0   2  -8   -0.10    6.80
   1   2  -9   -4.20    7.80
  15  -3  -6    4.40    9.10
  14  -3  -5    6.00    7.80
  13  -3  -4   22.00    9.10
  12  -3  -3  118.29   13.00
  11  -3  -2 1069.29   39.80
  11  -3  -2  967.20   42.90
  10  -3  -1  146.59    8.40
  10  -3  -1  153.58   11.00
  10  -3  -1  151.28    9.10
   9  -3   0    8.00    2.70
   9  -3   0    6.40    2.40
  -8   3  -1  401.86   15.70
   8  -3   1  450.05   17.70
  -7   3  -2  756.32   27.20
   7  -3   2  719.53   28.40
  -6   3  -3  166.88    8.70
  -6   3  -3  187.78    8.60
   6  -3   3  188.98    8.80
  -5   3  -4   97.49    7.60
   5  -3   4   92.49    5.70
  -4   3  -5  112.99    9.50
   4  -3   5  108.99    6.10
  -3   3  -6   55.39    8.70
  -2   3  -7    2.80    6.20
   2  -3   7    6.50    1.80
  -1   3  -8    3.70    7.30
   0   3  -9    2.40    8.50
  16  -4  -6   11.50   10.60
  15  -4  -5    3.20    8.70
  14  -4  -4    3.50    7.90
  13  -4  -3   -3.80    5.30
  12  -4  -2    8.30    4.00
  12  -4  -2    5.30    5.40
  11  -4  -1  187.28   12.80
  11  -4  -1  214.28   10.70
  11  -4  -1  195.48   11.40
 -10   4   0  193.08    9.50
  10  -4   0  227.38   11.10
  10  -4   0  187.48   10.40
  -9   4  -1   55.79    3.50
   9  -4   1   50.59    5.10
  -8   4  -2   26.00    3.60
  -8   4  -2   25.10    2.50
   8  -4   2   22.50    3.40
  -7   4  -3  180.48    8.90
   7  -4   3  170.68    9.10
  -6   4  -4  213.58   11.70
   6  -4   4  216.98   10.50
  -5   4  -5   11.50    4.60
   5  -4   5   11.70    2.50
  -4   4  -6    0.00    4.50
   4  -4   6   -0.90    1.50
  -3   4  -7    6.00    6.00
  -2   4  -8   -4.50    6.20
  -1   4  -9    5.50    8.50
  17  -5  -6   -1.30    9.30
  16  -5  -5   -7.20    7.90
  15  -5  -4   32.80   10.50
  14  -5  -3   15.70    7.70
  13  -5  -2   74.99   10.50
 -12   5   1   56.99    6.20
  12  -5  -1   62.09    6.60
  11  -5   0    4.90    3.10
 -10   5  -1   27.00    2.80
  10  -5   1   21.40    4.30
  -9   5  -2   87.99    8.30
  -9   5  -2   50.89    3.80
   9  -5   2   75.29    6.20
  -8   5  -3  230.38   10.90
   8  -5   3  230.88   11.60
  -7   5  -4   80.39    7.00
   7  -5   4   79.19    6.20
  -6   5  -5    6.90    4.00
   6  -5   5   14.20    2.80
  -5   5  -6   -2.10    4.20
   5  -5   6    0.50    1.80
  -4   5  -7    6.70    6.00
  -3   5  -8    5.40    7.10
  17  -6  -5    3.00    9.70
  16  -6  -4    4.70    8.10
 -15   6   3    5.40    5.10
 -14   6   2   31.40    6.10
 -13   6   1  196.18   11.20
 -12   6   0  719.73   27.90
  12  -6   0  730.03   29.80
  12  -6   0  687.93   29.00
 -11   6  -1  379.06   15.80
  11  -6   1  422.96   18.40
 -10   6  -2  172.28    8.50
  10  -6   2  213.98   11.10
  -9   6  -3  101.39    6.70
   9  -6   3  116.99    7.90
  -8   6  -4    3.00    3.00
   8  -6   4    2.40    2.40
  -7   6  -5    5.80    3.80
   7  -6   5    1.80    2.20
  -6   6  -6   52.69    8.10
   6  -6   6   36.40    4.40
  -5   6  -7   13.90    7.30
 -18   7   5    5.40    5.70
 -17   7   4    0.40    4.70
 -16   7   3   12.10    5.30
 -15   7   2    9.50    4.50
 -14   7   1  155.58    9.70
 -13   7   0    0.30    2.30
  13  -7   0    3.00    3.10
 -12   7  -1  351.96   14.60
  12  -7   1  351.26   17.00
  12  -7   1  349.47   17.10
 -11   7  -2  276.87   12.90
  11  -7   2  349.77   15.70
 -10   7  -3  182.58   10.00
  10  -7   3  229.58   11.80
  -9   7  -4  215.78   14.20
   9  -7   4  229.18   12.10
   8  -7   5   82.09    6.60
 -18   8   4   -5.00    5.00
 -17   8   3   32.00    7.00
 -16   8   2   25.10    5.90
 -15   8   1    2.70    3.10
 -14   8   0  120.19    7.60
 -13   8  -1  162.28    8.10
  13  -8   1  139.59   10.30
  12  -8   2   -1.70    2.60
  11  -8   3   33.50    5.00
  10  -8   4    1.60    2.60
   9  -8   5    0.60    2.30
 -19   9   4   -4.20    4.70
 -18   9   3    1.30    4.70
 -17   9   2    4.20    4.30
 -16   9   1   15.50    4.60
  13  -9   2   37.70    5.70
  12  -9   3    1.60    3.10
  11  -9   4   40.80    5.70
  13 -10   3   19.60    4.60
  12 -10   4   -3.20    2.80
  -9  20  -3   -3.40    6.00
 -10  20  -2   -2.70    5.50
 -11  20  -1    6.70    5.40
  -7  19  -4   12.10    7.90
  -8  19  -3    5.40    6.10
  -9  19  -2   24.70    7.10
 -10  19  -1   36.30    7.20
 -11  19   0   -2.70    4.20
 -12  19   1    6.40    4.90
  -5  18  -5    4.10    7.30
  -6  18  -4   10.30    7.20
  -7  18  -3   40.10    8.30
  -8  18  -2    9.50    5.90
  -9  18  -1   25.60    6.30
 -10  18   0  106.39    9.50
 -11  18   1   19.80    4.90
 -12  18   2   -4.20    4.30
  -3  17  -6   -2.00    7.50
  -4  17  -5    3.00    6.90
  -5  17  -4    2.10    5.40
  -6  17  -3   24.70    7.20
  -7  17  -2    2.90    4.70
  -8  17  -1   -2.80    3.20
  -9  17   0   -1.50    3.10
 -10  17   1   24.00    5.40
 -11  17   2   16.60    5.40
 -12  17   3    2.90    4.30
  -1  16  -7   -9.50    7.60
  -2  16  -6    7.40    8.30
  -3  16  -5    0.00    6.20
  -4  16  -4   13.70    7.00
  -5  16  -3   -1.60    4.40
  -6  16  -2   10.90    4.40
  -7  16  -1    0.20    3.30
  -8  16   0   18.20    4.10
  -9  16   1    1.90    3.20
 -10  16   2    9.70    4.90
 -11  16   3   17.20    6.10
 -12  16   4    4.50    5.60
   0  15  -7    1.70    8.10
  -1  15  -6   -5.60    5.80
  -2  15  -5    1.80    6.40
   3 -15   4    9.70    3.30
  -3  15  -4    6.70    5.80
   4 -15   3   49.80    6.20
  -4  15  -3   45.80    7.90
  -5  15  -2   98.09    8.60
  -6  15  -1   17.10    4.20
  -7  15   0   -1.70    2.70
  -8  15   1   44.10    5.80
  -9  15   2   57.29    7.40
 -10  15   3   35.30    6.70
 -11  15   4   29.40    7.20
 -12  15   5   12.50    6.00
   1  14  -7    9.50    8.50
   0  14  -6   40.20   10.50
   1 -14   5   27.00    4.50
  -1  14  -5   36.90    8.80
   2 -14   4    1.90    2.70
  -2  14  -4   -1.10    4.40
   3 -14   3   17.50    3.80
  -3  14  -3    8.90    5.30
   4 -14   2    5.40    2.90
  -4  14  -2    7.30    3.80
  -5  14  -1   96.29    7.70
  -6  14   0   43.90    5.10
  -7  14   1   36.60    5.50
  -8  14   2    1.30    3.10
  -9  14   3   19.20    5.30
 -10  14   4   32.20    6.70
 -11  14   5    2.80    5.30
 -12  14   6   -1.20    5.60
   3  13  -8   -1.60    8.50
   2  13  -7    9.10    8.70
   1  13  -6   -0.10    6.30
   0 -13   5   36.40    4.80
   0  13  -5   33.50    9.20
   1 -13   4  187.78   10.80
  -1  13  -4  174.48   14.40
   2 -13   3   88.19    7.00
  -2  13  -3   90.69    9.60
   3 -13   2    5.00    3.00
  -3  13  -2    3.00    4.10
   4 -13   1    6.10    2.80
  -4  13  -1   11.80    3.70
  -4  13  -1    8.00    3.30
   5 -13   0   -0.90    2.20
  -5  13   0    5.10    3.70
  -6  13   1   18.00    4.20
  -7  13   2    6.50    4.30
  -8  13   3   42.20    6.70
  -9  13   4   -2.20    3.90
 -10  13   5   15.80    6.30
 -11  13   6   -1.70    5.30
   4  12  -8   -6.10    7.00
   3  12  -7   -2.50    6.70
   2  12  -6   -5.30    6.50
  -1 -12   5   35.80    4.40
   1  12  -5   36.00    8.50
   0 -12   4   31.10    4.30
   0  12  -4   17.50    6.10
   1 -12   3   65.99    6.00
  -1  12  -3   61.79    8.00
   2 -12   2  128.09    8.40
  -2  12  -2  134.39    9.50
  -2  12  -2  136.39    9.00
   3 -12   1   92.49    7.20
  -3  12  -1   91.19    7.60
  -3  12  -1   94.69    7.00
   4 -12   0  231.98   11.90
  -4  12   0  227.58   12.40
  -4  12   0  244.68   11.70
   5 -12  -1    2.30    2.10
  -5  12   1   -0.20    2.50
  -5  12   1    6.20    3.00
  -6  12   2   81.29    7.10
  -7  12   3   32.80    6.00
  -8  12   4   16.20    5.40
  -9  12   5    2.00    5.00
 -10  12   6   10.00    6.00
 -11  12   7    1.10    5.00
   5  11  -8    7.10    9.60
   4  11  -7    8.80    8.50
   3  11  -6    5.60    7.50
  -2 -11   5   44.70    4.90
   2  11  -5   41.50    9.30
  -1 -11   4   19.30    3.40
   1  11  -4   14.00    5.80
   0 -11   3   -0.40    2.20
   0  11  -3   -4.50    3.60
   1 -11   2  225.78   11.30
  -1  11  -2  232.98   12.00
  -1  11  -2  218.88   12.50
   2 -11   1  876.41   34.20
  -2  11  -1  878.61   34.70
  -2  11  -1  892.61   34.30
   3 -11   0   -1.50    2.20
  -3  11   0    1.80    2.10
  -3  11   0   -2.90    2.30
   4 -11  -1  276.87   13.10
  -4  11   1  290.17   13.30
  -4  11   1  279.67   13.60
   5 -11  -2   -3.10    1.80
  -5  11   2    2.00    2.40
  -5  11   2   -3.80    2.70
  -6  11   3   27.40    5.10
  -7  11   4   80.29    8.50
  -8  11   5   -1.20    4.50
  -9  11   6    5.10    5.20
 -10  11   7   -5.30    4.50
   6  10  -8   -7.90    6.90
   5  10  -7   30.90   10.30
   4  10  -6   49.60   10.20
  -3 -10   5   -0.20    1.90
   3  10  -5    2.00    6.00
  -2 -10   4   74.29    5.90
   2  10  -4   82.49   10.10
  -1 -10   3  711.63   27.80
   1  10  -3  693.83   30.80
   0 -10   2  267.17   12.50
   0  10  -2  265.07   12.80
   0  10  -2  280.27   13.90
   1 -10   1  700.43   27.40
  -1  10  -1  701.43   27.70
  -1  10  -1  691.63   27.50
   2 -10   0 3382.86  116.49
  -2  10   0 3178.08  116.59
  -2  10   0 3173.28  115.99
   3 -10  -1 1316.07   49.10
  -3  10   1 1357.76   49.40
  -3  10   1 1291.87   49.40
   4 -10  -2    0.40    1.60
  -4  10   2    2.40    2.30
  -4  10   2    1.10    2.80
  -5  10   3    1.50    2.20
  -5  10   3   -2.80    2.80
  -6  10   4   11.00    4.80
  -7  10   5    0.00    4.50
  -8  10   6    5.20    5.00
  -9  10   7    8.10    5.80
   7   9  -8    2.90    9.40
   6   9  -7   15.00    9.70
   5   9  -6    4.50    7.30
  -4  -9   5   43.30    4.60
   4   9  -5   42.40    9.00
  -3  -9   4   50.29    4.70
   3   9  -4   48.70    7.90
  -2  -9   3   85.09    5.80
   2   9  -3   75.79    8.10
  -1  -9   2   10.60    2.30
   1   9  -2    9.70    3.40
   1   9  -2   15.10    3.00
   0  -9   1   19.30    2.80
   0   9  -1   16.30    2.60
   0   9  -1   13.90    2.60
   1  -9   0    1.30    1.40
  -1   9   0    0.00    1.50
  -1   9   0   -0.50    1.30
   2  -9  -1  806.12   31.10
  -2   9   1  831.42   31.50
  -2   9   1  827.92   31.40
   3  -9  -2 1691.63   61.59
  -3   9   2 1730.23   62.89
  -3   9   2 1666.23   61.99
   4  -9  -3   29.00    3.20
  -4   9   3   23.70    4.70
  -4   9   3   30.80    3.80
  -5   9   4   12.20    5.00
  -5   9   4   17.10    3.00
  -6   9   5    4.40    4.30
  -7   9   6    2.80    4.80
  -8   9   7   -2.00    5.40
  -9   9   8    2.50    5.80
   8   8  -8   -0.10    9.00
   7   8  -7    6.40    8.90
  -6  -8   6   41.00    5.80
   6   8  -6   47.20   10.10
  -5  -8   5   37.60    4.20
   5   8  -5   38.10    8.10
  -4  -8   4    4.20    2.20
   4   8  -4    2.60    5.70
  -3  -8   3    6.30    2.00
   3   8  -3    6.20    2.20
   3   8  -3    4.30    3.80
  -2  -8   2  205.58    9.50
   2   8  -2  199.28    9.80
   2   8  -2  220.78   11.30
  -1  -8   1  125.09    6.60
   1   8  -1  126.69    6.80
   1   8  -1  126.39    7.10
   0  -8   0   57.29    3.80
   0   8   0   47.10    3.60
   0   8   0   47.20    3.70
   1  -8  -1  700.43   25.80
  -1   8   1  654.03   25.90
  -1   8   1  685.73   26.10
   2  -8  -2   66.09    4.20
  -2   8   2   68.99    5.30
  -2   8   2   70.59    4.70
   3  -8  -3  724.63   27.30
  -3   8   3  736.13   28.00
  -3   8   3  734.83   29.70
   4  -8  -4   35.30    3.00
  -4   8   4   35.00    6.10
  -4   8   4   34.70    3.70
  -5   8   5   49.70    7.30
   6  -8  -6   12.60    7.90
   7  -8  -7   -6.30    6.70
   8  -8  -8   -1.90    9.80
   9   7  -8   -4.10    7.80
   8   7  -7    2.00    7.20
  -7  -7   6    8.90    3.20
   7   7  -6   25.40    9.00
  -6  -7   5    4.50    2.30
   6   7  -5    2.70    5.30
  -5  -7   4   74.79    5.60
   5   7  -4   67.89    9.80
  -4  -7   3  179.28    8.70
   4   7  -3  185.48   12.10
   4   7  -3  176.78    8.90
  -3  -7   2  725.53   28.10
   3   7  -2  738.83   30.20
   3   7  -2  775.22   28.50
  -2  -7   1  219.28    9.60
   2   7  -1  219.78    9.80
   2   7  -1  226.58   10.50
  -1  -7   0   -1.60    0.80
   1   7   0   -1.00    0.80
   1   7   0    0.00    1.00
   0  -7  -1  920.91   34.00
   0   7   1  950.60   34.40
   0   7   1  917.41   34.40
   1  -7  -2  143.39    6.50
  -1   7   2  151.88    7.00
  -1   7   2  143.19    7.70
   2  -7  -3    6.30    1.30
  -2   7   3    8.20    3.00
  -2   7   3    4.50    1.70
  -3   7   4  413.76   16.40
  -3   7   4  407.86   19.00
   4  -7  -5  130.09   13.10
   5  -7  -6    2.10    7.60
   6  -7  -7   22.80    9.30
   7  -7  -8    8.30    9.30
  10   6  -8   -9.00    8.00
   9   6  -7   -0.90    8.00
  -8  -6   6   10.30    5.10
   8   6  -6   20.50    8.20
  -7  -6   5    9.80    2.70
   7   6  -5    4.80    6.00
  -6  -6   4   -4.00    1.90
   6   6  -4   -4.30    5.00
  -5  -6   3  102.59    6.10
   5   6  -3  132.69    9.70
   5   6  -3  100.59    6.10
  -4  -6   2   23.10    2.50
   4   6  -2   21.60    2.50
   4   6  -2   27.20    4.30
  -3  -6   1  464.25   17.60
   3   6  -1  449.26   18.60
   3   6  -1  453.95   17.80
  -2  -6   0   84.99    4.30
   2   6   0   79.79    4.30
   2   6   0   77.99    4.40
  -1  -6  -1  127.79    5.60
   1   6   1  122.49    5.80
   1   6   1  124.49    6.00
   0  -6  -2  198.58    7.90
   0   6   2  196.28    9.20
   0   6   2  188.38    8.10
  -1   6   3  246.58   10.00
  -1   6   3  241.78   11.80
   2  -6  -4  217.28   14.60
  -2   6   4  208.18    8.90
   3  -6  -5  173.78   15.00
   4  -6  -6   70.09   11.20
   5  -6  -7   20.80    9.10
   6  -6  -8    3.90    8.40
   7  -6  -9    0.60    9.90
  11   5  -8    5.60    8.50
  10   5  -7    4.50    8.50
   9   5  -6   -2.50    6.20
  -8  -5   5   55.59    5.40
   8   5  -5   41.30    8.90
  -7  -5   4  259.57   12.00
   7   5  -4  250.77   16.50
  -6  -5   3  280.77   12.00
   6   5  -3  277.37   12.00
   6   5  -3  258.17   15.40
  -5  -5   2   35.50    3.20
   5   5  -2   32.30    4.90
   5   5  -2   33.10    3.20
  -4  -5   1    2.70    1.20
   4   5  -1    1.80    1.10
   4   5  -1    5.40    1.90
  -3  -5   0    1.80    1.00
   3   5   0    0.70    0.90
  -2  -5  -1   83.39    4.00
   2   5   1   85.59    4.20
   2   5   1   82.69    4.10
  -1  -5  -2  636.34   22.60
   1   5   2  616.94   22.90
   1   5   2  623.74   23.90
   0   5   3 2072.49   71.69
   0   5   3 1972.20   73.59
   1  -5  -4  114.79   10.40
  -1   5   4  122.49    5.30
   2  -5  -5    3.90    6.00
   3  -5  -6   -4.90    6.00
   4  -5  -7    1.20    6.80
   5  -5  -8   -4.40    7.80
   6  -5  -9    1.10    8.00
  12   4  -8   -3.70    8.50
  11   4  -7    4.70    7.80
  10   4  -6    2.50    6.80
  -9  -4   5   58.89    5.60
   9   4  -5   44.20    9.30
  -8  -4   4   39.40    4.40
   8   4  -4   32.70    7.80
  -7  -4   3  276.77   12.40
   7   4  -3  267.97   15.80
   7   4  -3  293.47   12.90
  -6  -4   2  594.74   22.60
   6   4  -2  593.74   22.50
   6   4  -2  570.04   24.90
  -5  -4   1  124.49    5.90
   5   4  -1  120.89    5.80
   5   4  -1  123.19    7.10
  -4  -4   0   54.19    3.10
   4   4   0   45.00    3.40
   4   4   0   48.90    3.10
  -3  -4  -1  768.72   27.60
   3   4   1  764.22   27.60
   3   4   1  747.83   27.50
  -2  -4  -2  573.64   20.90
   2   4   2  587.14   22.00
   2   4   2  581.14   21.00
  -1  -4  -3   97.39    8.10
   1   4   3  110.89    4.40
   0  -4  -4  238.48   14.30
   1  -4  -5   56.29    9.00
   2  -4  -6    1.60    6.50
   3  -4  -7   -1.00    6.20
   4  -4  -8    5.80    9.20
   5  -4  -9   -0.80    9.30
  13   3  -8   -1.20    7.90
  12   3  -7    1.90    8.30
  11   3  -6   -1.70    6.50
 -10  -3   5   20.10    3.70
  10   3  -5   24.30    8.10
  -9  -3   4   22.50    3.60
   9   3  -4   21.90    7.70
  -8  -3   3  776.62   29.80
   8   3  -3  771.92   34.20
  -7  -3   2   58.39    4.40
   7   3  -2   58.29    6.30
   7   3  -2   65.49    4.10
  -6  -3   1  972.60   35.10
   6   3  -1  933.31   36.40
   6   3  -1  945.41   34.90
  -5  -3   0   -0.10    0.90
   5   3   0    0.20    0.90
   5   3   0   -0.90    1.20
  -4  -3  -1  358.36   13.90
   4   3   1  370.56   13.50
   4   3   1  366.96   13.80
  -3  -3  -2  882.91   32.00
   3   3   2  916.01   32.60
   3   3   2  881.31   31.90
  -2  -3  -3  526.75   22.40
   2   3   3  528.55   18.80
  -1  -3  -4 1361.46   53.29
   0  -3  -5  166.08   13.60
   1  -3  -6    0.80    5.20
   2  -3  -7    5.00    7.70
   3  -3  -8   23.00    9.60
   4  -3  -9    2.80    8.80
  13   2  -7   20.80   10.00
  12   2  -6   33.30   11.20
 -11  -2   5   19.20    3.90
  11   2  -5   16.60    8.10
 -10  -2   4  148.29    9.10
  10   2  -4  142.09   13.60
  -9  -2   3  496.05   20.30
   9   2  -3  477.85   24.50
  -8  -2   2   67.09    5.00
   8   2  -2   63.29    7.00
   8   2  -2   71.99    4.60
  -7  -2   1  189.98    8.80
   7   2  -1  195.68    8.60
   7   2  -1  189.48   10.10
  -6  -2   0  142.69    6.80
   6   2   0  149.39    7.10
   6   2   0  143.79    6.70
  -5  -2  -1  214.98    8.20
  -5  -2  -1  224.78    9.10
   5   2   1  214.18    8.90
   5   2   1  222.78    8.40
   4   2   2    1.50    0.90
  -3  -2  -3   26.30    4.10
   3   2   3   30.60    2.10
  -2  -2  -4   -3.20    3.90
  -1  -2  -5  207.48   14.30
   0  -2  -6   38.00    7.90
   1  -2  -7    4.80    7.20
   2  -2  -8   -9.10    7.40
   3  -2  -9    4.20    9.40
  14   1  -7   10.80   10.40
  13   1  -6   -2.10    7.50
 -12  -1   5   31.40    4.90
  12   1  -5   34.50    9.70
 -11  -1   4    7.00    3.20
  11   1  -4   10.40    6.20
 -10  -1   3   16.20    3.40
  10   1  -3    5.60    6.00
  -9  -1   2  531.45   21.10
   9   1  -2  505.55   20.50
   9   1  -2  511.55   24.00
  -8  -1   1  691.63   26.60
   8   1  -1  708.83   26.30
   8   1  -1  664.73   28.00
  -7  -1   0   -0.60    1.30
   7   1   0   -0.50    1.00
   7   1   0    0.00    1.50
  -6  -1  -1 1048.60   40.10
  -6  -1  -1 1127.09   38.70
   6   1   1 1084.79   39.90
   6   1   1 1118.99   39.10
   5   1   2 1465.65   51.79
   5   1   2 1455.15   51.29
   5   1   2 1440.06   52.19
  -4  -1  -3  121.89    7.20
   4   1   3  119.99    5.50
   4   1   3  133.69    5.70
  -3  -1  -4   33.00    5.30
   3   1   4   19.50    1.90
  -2  -1  -5   24.70    6.20
  -1  -1  -6    1.00    4.60
   0  -1  -7   -1.10    6.00
   1  -1  -8    2.40    7.60
   2  -1  -9   -3.40    8.40
  15   0  -7   -1.50    9.10
  14   0  -6   20.80   10.20
 -13   0   5   41.30    6.20
  13   0  -5   48.50   10.70
 -12   0   4   28.70    4.80
  12   0  -4   34.90    9.00
 -11   0   3    3.30    3.00
  11   0  -3   13.90    6.90
 -10   0   2  258.77   12.70
  10   0  -2  280.97   12.20
  10   0  -2  253.87   15.70
  -9   0   1   12.20    2.70
   9   0  -1   19.20    2.80
   9   0  -1   14.30    3.90
  -8   0   0   36.10    3.70
   8   0   0   51.99    3.80
   8   0   0   44.60    4.20
  -7   0  -1  951.50   32.90
   7   0   1  896.71   34.30
   6   0   2  189.18    8.30
   6   0   2  183.08    8.30
  -5   0  -3 2009.30   72.69
   5   0   3 2016.40   71.99
  -4   0  -4  236.28   12.80
   4   0   4  239.88    9.80
  -3   0  -5  200.38   13.60
   3   0   5  206.68    8.30
  -2   0  -6   48.60    8.40
   2   0   6   53.09    2.90
  -1   0  -7    0.90    6.20
   0   0  -8    0.10    7.10
   1   0  -9   -2.30    8.20
  16  -1  -7   -9.00    8.10
  15  -1  -6    0.70    9.20
  14  -1  -5   -4.00    8.10
 -13   1   4   39.80    5.40
  13  -1  -4   43.50   10.40
 -12   1   3  125.39    9.20
 -11   1   2  623.54   25.20
  11  -1  -2  569.14   27.90
  11  -1  -2  599.64   24.80
 -10   1   1   60.79    5.70
  10  -1  -1   69.09    5.20
  10  -1  -1   59.79    5.80
  10  -1  -1   65.39    7.70
  -8   1  -1  124.59    5.50
  -8   1  -1  156.88    6.10
   8  -1   1  138.19    7.40
   8  -1   1  131.99    7.20
   7  -1   2    2.40    1.60
   7  -1   2    4.90    1.70
  -6   1  -3    1.40    1.70
   6  -1   3    0.50    1.40
  -5   1  -4  197.08   10.80
   5  -1   4  185.88    8.60
  -4   1  -5  231.88   13.80
   4  -1   5  219.38    9.40
  -3   1  -6    0.50    4.50
   3  -1   6   -0.70    1.10
  -2   1  -7   20.00    7.70
   2  -1   7   23.70    2.20
  -1   1  -8    5.60    7.40
   0   1  -9   -4.70    7.20
  16  -2  -6   -4.50    7.90
  15  -2  -5   -2.40    7.10
  14  -2  -4    2.70    7.30
  13  -2  -3   69.29   10.50
  12  -2  -2   15.80    6.10
  12  -2  -2   26.60    4.30
  11  -2  -1 1051.59   42.90
  11  -2  -1 1052.39   40.50
  11  -2  -1 1098.49   41.20
  10  -2   0 1184.78   44.40
  10  -2   0 1147.29   44.00
  10  -2   0 1153.28   43.60
  -9   2  -1   97.79    4.40
   9  -2   1   87.89    6.10
   9  -2   1  100.39    6.60
   8  -2   2  202.18    9.80
   8  -2   2  201.78    9.90
  -7   2  -3  274.57   11.30
   7  -2   3  266.27   12.10
  -6   2  -4  108.49    8.00
   6  -2   4  154.48    7.40
  -5   2  -5   75.99    8.50
   5  -2   5   77.49    5.10
  -4   2  -6  178.58   13.30
   4  -2   6  189.38    8.50
  -3   2  -7   33.20    8.40
   3  -2   7   45.30    3.40
  -2   2  -8    1.80    7.40
  -1   2  -9    0.70    7.50
  17  -3  -6  -10.40    9.00
  16  -3  -5   -4.90    8.40
  15  -3  -4   16.90    9.00
  14  -3  -3   40.60    9.00
  13  -3  -2  253.37   16.70
  12  -3  -1  434.26   18.80
  12  -3  -1  446.06   19.80
  12  -3  -1  421.66   21.20
 -11   3   0   -1.50    2.20
  11  -3   0   -5.20    2.90
  11  -3   0   -1.10    2.30
  -9   3  -2    3.20    1.20
  -9   3  -2    5.40    2.20
   9  -3   2   12.80    2.90
  -8   3  -3    8.10    2.10
   8  -3   3    9.70    2.70
  -7   3  -4   34.00    4.50
   7  -3   4   35.10    4.10
  -6   3  -5    1.50    3.80
   6  -3   5    5.70    2.20
  -5   3  -6   11.60    5.10
   5  -3   6   11.70    2.30
  -4   3  -7   41.50    8.80
  -3   3  -8   32.30    9.50
  17  -4  -5    5.20    9.70
  16  -4  -4    5.90    8.00
  15  -4  -3   67.39   11.60
  14  -4  -2   32.50    7.90
  13  -4  -1   21.80    4.90
 -12   4   0  151.28    8.30
  12  -4   0  157.78   10.10
  12  -4   0  159.68    9.70
 -11   4  -1  180.08    7.80
  11  -4   1  170.88   10.10
  11  -4   1  179.28   10.70
  10  -4   2    8.50    3.10
  -9   4  -3   31.20    3.30
   9  -4   3   29.10    4.20
  -8   4  -4    3.80    2.70
   8  -4   4    5.00    2.50
  -7   4  -5   35.30    6.00
   7  -4   5   59.09    5.10
  -6   4  -6   -2.50    3.70
   6  -4   6    2.80    1.90
  -5   4  -7   -3.50    5.30
  18  -5  -5    5.70   10.00
  17  -5  -4    1.40    8.20
  16  -5  -3   17.60    8.20
 -15   5   2    1.10    4.20
 -14   5   1   33.10    5.00
 -13   5   0   -0.10    2.20
  13  -5   0   -1.60    3.30
  13  -5   0   -2.90    2.60
 -12   5  -1   60.99    4.00
  12  -5   1   58.09    6.00
  12  -5   1   50.99    6.10
  11  -5   2  115.49    8.60
  10  -5   3  205.78   11.30
   9  -5   4  288.87   14.00
   8  -5   5   34.30    4.50
   7  -5   6    4.90    2.30
 -19   6   5   -0.70    5.70
 -18   6   4   10.60    5.90
 -17   6   3   27.00    6.40
 -16   6   2    7.60    4.30
 -15   6   1   23.20    4.60
 -14   6   0   90.99    6.50
  14  -6   0   85.09    8.40
 -13   6  -1  185.68    8.70
  13  -6   1  187.98   11.70
  12  -6   2   21.20    4.30
  11  -6   3    7.30    3.00
  10  -6   4   23.00    4.10
   9  -6   5   92.29    7.30
 -19   7   4    8.70    5.90
 -18   7   3   17.90    5.90
 -17   7   2  103.29    9.10
 -16   7   1   22.00    4.50
  14  -7   1  148.89   10.60
  13  -7   2  455.45   21.20
  12  -7   3  168.48   10.90
  11  -7   4   44.20    5.70
  10  -7   5   40.70    5.60
  14  -8   2   -4.40    2.70
  13  -8   3   94.99    8.60
  12  -8   4   52.89    6.80
  14  -9   3    6.30    4.00
  13  -9   4    0.60    5.00
  -6  20  -4   12.00    7.60
  -7  20  -3   13.60    7.30
  -8  20  -2   -3.30    5.20
  -9  20  -1    3.20    5.70
 -10  20   0   40.50    7.20
 -11  20   1   12.10    5.50
  -4  19  -5   -4.80    6.70
  -5  19  -4    3.50    6.80
  -6  19  -3   -0.80    5.70
  -7  19  -2    4.20    5.70
  -8  19  -1   -2.60    3.90
  -9  19   0   -3.50    4.20
 -10  19   1   36.20    6.80
 -11  19   2   39.90    6.90
  -2  18  -6   14.80   10.10
  -3  18  -5   14.50    8.60
  -4  18  -4    5.90    7.00
  -5  18  -3   14.70    6.30
  -6  18  -2   31.70    7.30
  -7  18  -1    1.10    3.90
  -8  18   0   -3.80    3.60
  -9  18   1   24.50    5.30
 -10  18   2   -0.90    4.40
 -11  18   3   29.10    7.00
  -1  17  -6   -6.70    7.40
  -2  17  -5    8.70    7.90
  -3  17  -4   22.10    8.30
  -4  17  -3    5.10    5.70
  -5  17  -2    3.00    4.60
  -6  17  -1   15.00    4.90
  -7  17   0    0.60    3.00
  -8  17   1    1.70    3.80
  -9  17   2    8.50    4.20
 -10  17   3    2.00    4.70
 -11  17   4   11.40    5.50
   1  16  -7   -1.20    8.40
   0  16  -6    4.30    8.30
  -1  16  -5    7.60    7.10
   2 -16   4   -1.30    4.90
  -2  16  -4   -0.30    5.90
  -3  16  -3   22.70    7.00
  -4  16  -2    3.10    4.30
  -5  16  -1   36.50    6.00
  -6  16   0   12.60    3.80
  -7  16   1    1.60    2.90
  -8  16   2    2.70    3.60
  -9  16   3    1.20    4.40
 -10  16   4   -5.50    4.50
 -11  16   5    3.80    5.20
   2  15  -7    1.00    7.40
   1  15  -6   11.40    8.90
   0  15  -5   22.50    7.80
   1 -15   4   25.90    4.60
  -1  15  -4   21.10    7.00
   2 -15   3   37.70    5.10
  -2  15  -3   44.90    8.30
  -3  15  -2  182.28   12.50
  -4  15  -1  171.88   10.60
  -5  15   0   -0.70    2.50
  -6  15   1   22.10    4.40
  -7  15   2   14.20    4.20
  -8  15   3   10.30    4.60
  -9  15   4   -1.40    4.80
 -10  15   5   -0.60    5.30
   3  14  -7    8.90    9.30
   2  14  -6    9.90    8.40
  -1 -14   5    1.50    2.80
   1  14  -5   -1.30    6.60
   0 -14   4    2.80    2.50
   0  14  -4   -0.30    5.30
   1 -14   3   85.09    7.20
  -1  14  -3   84.79    9.80
   2 -14   2   64.29    6.20
  -2  14  -2   52.29    6.80
   3 -14   1  151.38    9.40
  -3  14  -1  165.68   13.80
  -3  14  -1  148.19    9.80
  -4  14   0  317.07   14.90
  -5  14   1   97.39    7.70
  -6  14   2    9.70    3.70
  -7  14   3    1.40    3.60
  -8  14   4   11.40    5.00
  -9  14   5    8.00    5.30
 -10  14   6    2.30    5.10
   4  13  -7   -3.80    8.30
   3  13  -6   -0.90    7.10
  -2 -13   5    3.60    2.70
   2  13  -5    9.70    6.80
  -1 -13   4   45.30    5.20
   1  13  -4   29.50    7.90
   0 -13   3  196.58   10.60
   0  13  -3  169.78   12.50
   1 -13   2   -0.50    2.10
  -1  13  -2    6.10    3.70
   2 -13   1   -2.30    2.10
  -2  13  -1    1.60    2.50
  -2  13  -1    2.60    2.80
   3 -13   0   -2.30    1.90
  -3  13   0   -1.30    2.40
  -3  13   0    0.80    2.40
  -4  13   1    7.30    3.40
  -5  13   2   88.79    7.60
  -6  13   3   21.60    5.30
  -7  13   4   71.09    8.00
  -8  13   5    1.60    5.00
  -9  13   6   -3.90    5.30
 -10  13   7    2.60    5.80
   6  12  -8   11.60    8.90
   5  12  -7   -7.10    7.60
   4  12  -6    9.50    7.80
  -3 -12   5   -0.20    2.10
   3  12  -5    3.30    5.60
  -2 -12   4   74.19    6.10
   2  12  -4   77.79   10.60
  -1 -12   3  135.69    8.20
   1  12  -3  115.49   10.30
   0 -12   2   -0.30    2.10
   0  12  -2   -1.40    2.50
   0  12  -2    1.10    3.50
   1 -12   1    3.60    2.60
  -1  12  -1    1.30    2.70
  -1  12  -1    2.20    2.90
   2 -12   0  114.09    7.60
  -2  12   0  121.09    7.30
  -2  12   0  121.29    8.20
   3 -12  -1   92.69    6.50
  -3  12   1   86.99    6.70
  -3  12   1   73.49    6.80
  -4  12   2   -1.50    2.30
  -4  12   2   -0.20    2.80
  -5  12   3   59.59    6.60
  -6  12   4   -0.50    3.40
  -7  12   5   47.40    7.30
  -8  12   6    1.00    4.50
  -9  12   7    2.60    5.30
   7  11  -8   17.00   10.20
   6  11  -7    4.00    8.40
   5  11  -6    3.10    6.80
  -4 -11   5    2.70    2.40
   4  11  -5    5.90    7.00
  -3 -11   4    5.60    2.40
   3  11  -4    8.60    5.70
  -2 -11   3   26.20    3.60
   2  11  -3   43.00    7.30
  -1 -11   2  612.24   24.30
   1  11  -2  580.24   25.80
   1  11  -2  605.94   24.70
   0 -11   1    7.30    2.40
   0  11  -1    3.80    2.30
   0  11  -1   11.20    3.10
   1 -11   0   -0.60    1.80
  -1  11   0   -2.80    1.90
  -1  11   0    2.00    2.30
   2 -11  -1  861.41   33.10
  -2  11   1  879.91   33.50
  -2  11   1  850.01   33.60
   3 -11  -2  852.71   32.60
  -3  11   2  825.42   33.10
  -3  11   2  877.71   33.80
  -4  11   3   59.89    6.90
  -4  11   3   62.49    5.70
  -5  11   4   64.89    7.90
  -6  11   5   39.70    7.40
  -7  11   6    1.50    5.30
  -8  11   7   -5.10    5.40
   8  10  -8    2.60    9.40
   7  10  -7   -8.70    7.30
   6  10  -6   95.49   14.60
  -5 -10   5   74.99    6.20
   5  10  -5   76.29   11.20
  -4 -10   4    5.20    2.40
   4  10  -4    5.70    5.10
  -3 -10   3  170.58    9.00
   3  10  -3  162.48   12.50
  -2 -10   2  176.18    9.10
   2  10  -2  165.58   10.60
   2  10  -2  187.48    9.60
  -1 -10   1   77.89    5.80
   1  10  -1   94.19    6.50
   1  10  -1  115.79    6.70
   0 -10   0  342.37   14.60
   0  10   0  327.67   14.80
   0  10   0  363.16   14.80
   1 -10  -1  687.53   26.60
  -1  10   1  698.73   27.00
  -1  10   1  685.63   26.90
   2 -10  -2    4.00    1.90
  -2  10   2    3.80    2.80
  -2  10   2    5.80    2.30
   3 -10  -3  575.84   22.70
  -3  10   3  592.54   23.50
  -3  10   3  597.84   25.00
  -4  10   4  113.09    9.30
  -4  10   4  114.79    7.00
  -5  10   5    4.70    4.30
  -6  10   6   21.00    6.20
  -7  10   7    3.60    5.20
  -8  10   8    0.30    6.40
   9   9  -8   -3.00    7.70
   8   9  -7   -0.40    8.20
   7   9  -6    4.40    6.90
  -6  -9   5   99.79    7.10
   6   9  -5   86.69   11.70
  -5  -9   4  289.87   13.00
   5   9  -4  257.87   17.20
  -4  -9   3   27.00    3.40
   4   9  -3   31.20    6.10
  -3  -9   2    1.40    1.70
   3   9  -2   -0.50    3.50
   3   9  -2    3.60    1.90
  -2  -9   1   98.69    5.70
   2   9  -1   96.39    6.30
   2   9  -1   89.29    5.80
   1   9   0   17.00    2.50
   0  -9  -1   16.10    2.40
   0   9   1   16.10    2.50
   0   9   1   14.80    2.50
   1  -9  -2  505.95   19.50
  -1   9   2  512.85   20.10
  -1   9   2  496.15   20.70
   2  -9  -3  476.55   18.50
  -2   9   3  471.55   19.30
  -2   9   3  495.45   20.90
   3  -9  -4   26.10    2.50
  -3   9   4   18.50    4.60
  -3   9   4   23.60    3.20
  -4   9   5   46.10    4.90
  -4   9   5   62.89    8.00
  -5   9   6   -3.20    4.20
  -6   9   7    4.70    6.20
  -7   9   8    1.30    5.50
  10   8  -8   10.20   10.20
   9   8  -7    5.60    7.50
   8   8  -6   19.90    8.00
  -7  -8   5   95.69    7.00
   7   8  -5  103.99   12.00
  -6  -8   4    4.60    2.40
   6   8  -4    4.20    5.80
  -5  -8   3  228.78   10.70
   5   8  -3  221.78   13.90
  -4  -8   2   19.80    2.60
   4   8  -2   15.00    2.60
   4   8  -2   21.00    4.40
  -3  -8   1  417.16   16.60
   3   8  -1  400.46   16.80
   3   8  -1  424.26   17.70
  -2  -8   0   17.80    2.30
   2   8   0   16.70    2.40
   2   8   0   18.50    2.50
  -1  -8  -1  135.39    6.70
   1   8   1  149.79    7.10
   1   8   1  148.19    7.10
   0  -8  -2  822.32   29.20
   0   8   2  769.22   30.20
   0   8   2  771.32   29.50
   1  -8  -3    6.30    1.50
  -1   8   3    7.40    3.00
  -1   8   3    7.60    1.90
   2  -8  -4  159.58    6.70
  -2   8   4  167.28    8.00
  -2   8   4  173.58   10.30
  -3   8   5    0.20    1.50
  -3   8   5   -0.50    3.70
  -4   8   6   77.29    9.60
   5  -8  -7  -13.20    6.20
  -5   8   7    1.40    5.40
  -6   8   8    3.10    6.30
  11   7  -8    2.10    9.10
  10   7  -7   -0.60    8.10
   9   7  -6    8.80    7.90
  -8  -7   5   15.40    3.20
   8   7  -5   12.90    6.80
  -7  -7   4   30.00    4.10
   7   7  -4   19.70    6.70
  -6  -7   3   25.30    3.60
   6   7  -3   19.00    6.10
  -5  -7   2  472.05   18.30
   5   7  -2  463.75   18.50
   5   7  -2  432.86   20.40
  -4  -7   1 1042.80   38.70
   4   7  -1 1033.50   39.00
   4   7  -1 1080.59   40.20
  -3  -7   0    0.30    1.00
   3   7   0   -0.70    0.90
   3   7   0    4.20    1.80
  -2  -7  -1  214.88    8.90
   2   7   1  214.18    9.20
   2   7   1  216.28    9.20
  -1  -7  -2    9.30    1.30
   1   7   2   11.10    2.30
   1   7   2    4.40    1.30
   0  -7  -3  141.19    5.90
   0   7   3  142.49    8.20
   0   7   3  144.09    6.60
  -1   7   4   41.30    3.40
  -1   7   4   55.09    6.50
   2  -7  -5    3.60    5.50
  -2   7   5   -0.10    3.90
   3  -7  -6   -7.50    6.10
   4  -7  -7   34.30   10.80
   5  -7  -8   20.90    9.70
   6  -7  -9   -6.10    8.70
  12   6  -8    6.10    8.60
  11   6  -7   36.50   11.50
  10   6  -6   14.70    7.90
  -9  -6   5    3.40    2.50
   9   6  -5   10.70    6.70
  -8  -6   4  150.38    8.60
   8   6  -4  150.38   13.00
  -7  -6   3  133.69    7.60
   7   6  -3  134.19   11.50
  -6  -6   2    0.10    1.50
   6   6  -2    4.70    3.30
   6   6  -2    2.60    1.60
  -5  -6   1   16.10    2.30
   5   6  -1   16.90    2.30
   5   6  -1   11.50    3.10
  -4  -6   0  986.50   36.70
   4   6   0 1005.50   37.20
   4   6   0 1020.40   36.90
  -3  -6  -1  445.76   17.20
   3   6   1  470.55   17.50
   3   6   1  452.95   17.40
  -2  -6  -2   41.50    2.40
   2   6   2   37.60    2.60
   2   6   2   35.30    3.30
   1   6   3    1.30    2.00
   1   6   3    7.20    1.30
   0   6   4   24.30    4.50
   0   6   4   22.50    2.20
   1  -6  -5   11.80    6.00
   2  -6  -6    5.70    6.90
   3  -6  -7   19.40    9.10
   4  -6  -8   16.90    9.00
   5  -6  -9    5.50   10.10
  12   5  -7   10.20    9.90
  11   5  -6    3.00    7.20
 -10  -5   5    4.60    2.80
  10   5  -5    6.70    6.60
  -9  -5   4   22.20    3.90
   9   5  -4   20.30    7.70
  -8  -5   3   74.69    6.00
   8   5  -3  115.99   10.00
  -7  -5   2   88.89    5.80
   7   5  -2   96.09    5.70
   7   5  -2  115.39    8.70
  -6  -5   1   49.20    3.70
   6   5  -1   43.50    4.40
   6   5  -1   47.50    3.50
  -5  -5   0    0.30    1.00
   5   5   0    1.00    1.10
   5   5   0   -0.90    1.40
  -4  -5  -1    1.30    0.90
   4   5   1    2.90    1.00
   4   5   1    1.50    0.90
  -3  -5  -2   75.39    3.70
   3   5   2   75.59    3.70
   3   5   2   76.29    4.30
   2   5   3  276.97   12.00
   2   5   3  257.87   10.10
  -1  -5  -4  192.88   13.00
   1   5   4  192.98    7.50
   0  -5  -5    9.40    5.80
   1  -5  -6    9.30    6.50
   2  -5  -7   -1.40    6.30
   3  -5  -8    2.40    8.30
   4  -5  -9    7.40    9.40
  13   4  -7    1.60    8.80
  12   4  -6   -5.70    7.80
 -11  -4   5    1.10    2.70
  11   4  -5    4.30    7.40
 -10  -4   4  122.19    8.00
  10   4  -4  111.09   13.00
  -9  -4   3   39.50    4.70
   9   4  -3   28.10    7.20
  -8  -4   2  422.76   17.10
   8   4  -2  409.86   16.80
   8   4  -2  398.66   19.60
  -7  -4   1  871.11   34.10
   7   4  -1  847.72   33.90
   7   4  -1 1036.20   36.10
  -6  -4   0   89.09    5.00
   6   4   0   89.29    4.80
   6   4   0   91.49    5.40
  -5  -4  -1  129.19    5.80
   5   4   1  122.39    5.40
   5   4   1  116.49    5.60
  -4  -4  -2  129.19    5.60
   4   4   2  127.19    5.50
   4   4   2  125.09    5.60
   3   4   3  167.58    8.30
   3   4   3  174.68    6.80
  -2  -4  -4   37.10    6.30
  -1  -4  -5  230.18   15.40
   0  -4  -6   70.59   10.40
   1  -4  -7    3.60    7.20
   2  -4  -8    3.50    8.70
   3  -4  -9   10.30    9.50
  14   3  -7   -0.90    9.10
  13   3  -6    4.70    8.80
 -12  -3   5    5.60    3.20
  12   3  -5    5.40    7.10
 -11  -3   4   -1.60    2.30
  11   3  -4   -2.50    6.20
 -10  -3   3  622.44   25.00
  10   3  -3  605.74   29.50
  -9  -3   2 1744.73   63.99
   9   3  -2 1706.83   66.99
   9   3  -2 1784.72   63.59
  -8  -3   1  376.76   15.40
   8   3  -1  362.86   16.90
   8   3  -1  369.36   15.10
  -7  -3   0    0.80    1.30
   7   3   0    0.50    1.10
  -6  -3  -1  970.90   35.80
   6   3   1  960.70   35.60
   6   3   1  991.30   35.30
  -5  -3  -2 1150.48   40.60
   5   3   2 1102.79   40.40
   5   3   2 1113.69   40.00
   4   3   3  430.66   17.10
   4   3   3  442.26   16.20
  -3  -3  -4  471.85   21.70
  -2  -3  -5  209.48   14.20
  -1  -3  -6    3.70    5.70
   0  -3  -7   30.20    8.20
   1  -3  -8   13.10    8.60
   2  -3  -9   -2.10    8.40
  15   2  -7    1.10    8.40
  14   2  -6   23.80   10.50
 -13  -2   5   59.29    7.00
  13   2  -5   55.39   12.30
 -12  -2   4    1.40    2.70
  12   2  -4   -6.10    5.70
 -11  -2   3   24.60    4.10
  11   2  -3   27.40    7.40
 -10  -2   2   11.80    3.00
  10   2  -2    5.40    2.20
  10   2  -2    6.00    4.90
  -9  -2   1  823.82   32.50
   9   2  -1  871.51   34.30
   9   2  -1  853.91   32.10
  -8  -2   0 2052.39   74.89
   8   2   0 2092.69   75.29
   8   2   0 2073.79   74.59
  -7  -2  -1  189.78    8.70
   7   2   1  190.28    8.40
   7   2   1  189.88    7.90
   6   2   2  110.19    5.20
   6   2   2  114.19    4.40
   6   2   2  111.49    5.50
   5   2   3  908.01   32.70
   5   2   3  889.11   32.80
  -4  -2  -4  275.27   13.90
   4   2   4  265.77   10.50
   4   2   4  268.67   10.40
  -2  -2  -6  105.69   11.30
  -1  -2  -7   30.50    8.80
   0  -2  -8   -1.90    7.50
   1  -2  -9    8.50    9.30
  16   1  -7  -10.60    8.60
  15   1  -6    1.40    9.00
  14   1  -5   19.50    9.20
 -13  -1   4  190.48   11.40
  13   1  -4  181.88   16.10
 -12  -1   3   80.79    7.20
  12   1  -3   64.19    9.80
 -11  -1   2  253.37   13.40
  11   1  -2  317.37   17.30
 -10  -1   1  717.23   28.20
  10   1  -1  715.73   29.80
  10   1  -1  699.53   27.50
  -9  -1   0    3.80    2.00
   9   1   0   -0.60    2.10
   9   1   0    0.70    1.40
  -8  -1  -1  683.83   26.00
   8   1   1  665.13   24.70
   8   1   1  663.63   25.50
   7   1   2  135.19    6.70
   6   1   3  244.38    9.40
   6   1   3  241.38   10.20
   6   1   3  237.58   10.10
  -5  -1  -4  121.99    8.40
   5   1   4  123.99    6.00
   5   1   4  127.99    6.00
  -4  -1  -5   48.00    7.10
   4   1   5   51.89    3.40
   4   1   5   61.69    3.80
  -3  -1  -6   -5.50    4.20
  -2  -1  -7   16.90    7.30
  -1  -1  -8   -2.80    7.20
   0  -1  -9   -3.70    7.70
  16   0  -6   -2.10    9.20
  15   0  -5   20.60    9.80
 -14   0   4   -0.40    3.40
  14   0  -4    8.20    6.70
 -13   0   3  171.38   10.90
  13   0  -3  173.58   14.40
 -12   0   2    1.70    3.10
  12   0  -2    8.20    5.40
 -11   0   1   11.40    3.40
  11   0  -1    5.60    2.40
  11   0  -1    5.70    4.10
 -10   0   0  352.56   15.60
  10   0   0  340.67   14.70
  10   0   0  336.07   15.50
  -9   0  -1   18.50    1.70
   9   0   1   14.30    2.60
   9   0   1   16.30    2.00
   8   0   2  782.52   29.80
   8   0   2  793.42   30.00
   7   0   3  143.79    5.40
   7   0   3  143.49    7.40
   7   0   3  147.59    7.30
  -6   0  -4   20.10    3.80
   6   0   4   23.00    2.90
   6   0   4   20.10    2.70
  -5   0  -5    6.90    4.30
   5   0   5    6.30    2.00
  -4   0  -6   72.29    9.40
   4   0   6   89.59    4.50
  -3   0  -7   24.80    8.30
   3   0   7   38.40    2.40
  -2   0  -8   -3.40    7.30
  -1   0  -9   -2.90    7.30
  17  -1  -6   -3.20    8.60
  16  -1  -5   14.10    9.90
  15  -1  -4   10.40    8.10
  14  -1  -3   22.50    8.40
  13  -1  -2  313.17   15.80
  13  -1  -2  295.17   18.20
  12  -1  -1  406.76   20.70
  12  -1  -1  421.46   18.00
  12  -1  -1  425.16   19.00
  11  -1   0   -1.70    2.80
  11  -1   0   -0.50    2.50
  11  -1   0   -2.00    1.80
 -10   1  -1   66.29    3.40
  10  -1   1   65.99    5.90
  10  -1   1   66.09    5.40
   9  -1   2    9.30    2.60
   9  -1   2   13.80    3.10
   8  -1   3  381.46   16.40
   8  -1   3  406.26   16.60
  -7   1  -4  502.35   20.80
   7  -1   4  521.95   20.50
  -6   1  -5   34.20    5.70
   6  -1   5   43.00    4.00
  -5   1  -6    5.40    4.70
   5  -1   6    2.40    1.60
  -4   1  -7   42.50    8.80
   4  -1   7   50.39    3.50
  -3   1  -8   40.80    9.80
  18  -2  -6    0.60   10.00
  17  -2  -5    8.80    9.10
  16  -2  -4   20.90    9.80
  15  -2  -3    8.60    7.20
  14  -2  -2   -1.70    5.10
  13  -2  -1  217.38   12.40
  13  -2  -1  229.58   14.20
  12  -2   0 1446.86   54.99
  12  -2   0 1440.96   54.39
  12  -2   0 1469.05   55.19
 -11   2  -1 1057.39   38.90
  11  -2   1 1065.19   41.10
  11  -2   1 1125.49   41.80
  10  -2   2  173.68   10.10
  10  -2   2  172.38    9.60
   9  -2   3   67.69    5.80
   9  -2   3   78.59    6.20
  -8   2  -4    5.30    2.50
   8  -2   4    0.60    2.10
  -7   2  -5    6.70    3.70
   7  -2   5    3.30    2.10
  -6   2  -6    2.90    4.00
   6  -2   6    6.60    2.00
  -5   2  -7    7.30    6.50
  18  -3  -5    2.70    9.50
  17  -3  -4    4.10    8.20
  16  -3  -3    1.10    7.00
  15  -3  -2   10.90    6.60
  14  -3  -1   19.90    5.00
  14  -3  -1   31.20    6.30
 -13   3   0    2.90    2.40
  13  -3   0   -0.30    3.20
  13  -3   0   -2.00    2.40
 -12   3  -1  408.36   16.60
  12  -3   1  439.46   19.20
  12  -3   1  478.85   20.30
  11  -3   2  659.33   26.60
  11  -3   2  639.24   26.70
  10  -3   3  177.38   10.20
  10  -3   3  164.48    9.90
   9  -3   4   77.29    6.30
   8  -3   5   57.39    5.40
   7  -3   6   14.20    2.70
  19  -4  -5    3.10   10.40
  18  -4  -4    3.40    8.60
  17  -4  -3   10.60    7.80
  16  -4  -2   29.30    8.10
 -15   4   1    8.70    4.00
  14  -4   0   13.60    3.80
  13  -4   1   17.90    4.50
  13  -4   1   10.90    3.70
  12  -4   2    3.10    3.10
  12  -4   2    9.70    3.50
  11  -4   3   98.89    7.90
  10  -4   4    4.00    2.90
   9  -4   5   35.50    4.70
   8  -4   6    4.20    2.40
  19  -5  -4    1.10    9.30
 -18   5   3   17.60    5.90
 -17   5   2   56.09    7.60
 -16   5   1   10.70    4.10
  14  -5   1   23.70    5.20
  13  -5   2   54.89    6.60
  12  -5   3   30.80    4.70
  11  -5   4   72.19    6.90
  10  -5   5   82.49    7.20
  15  -6   1    4.00    3.80
  13  -6   3   65.19    7.30
  12  -6   4   26.90    4.70
  11  -6   5   40.10    5.70
  15  -7   2    4.90    3.70
  14  -7   3   19.80    4.70
  13  -7   4    1.70    3.10
  15  -8   3   16.80    4.80
  -6  21  -3    8.60    7.50
  -7  21  -2    6.00    6.30
  -8  21  -1   -0.40    5.00
  -9  21   0    0.70    4.70
  -4  20  -4    5.60    7.90
  -5  20  -3   16.10    7.80
  -6  20  -2    5.00    5.80
  -7  20  -1    3.90    5.40
  -8  20   0   -7.50    3.40
  -9  20   1    9.10    5.30
 -10  20   2   -2.50    3.90
  -2  19  -5    9.90    7.50
  -3  19  -4   27.90    8.60
  -4  19  -3   26.50    8.30
  -5  19  -2   55.19    8.70
  -6  19  -1   51.19    7.70
  -7  19   0    2.30    4.40
  -8  19   1    1.60    4.10
  -9  19   2   30.10    6.10
 -10  19   3   14.70    5.80
   0  18  -6   10.60    9.30
  -1  18  -5    2.00    7.80
  -2  18  -4    0.90    5.80
  -3  18  -3   12.80    6.30
  -4  18  -2   -0.80    4.90
  -5  18  -1   21.10    5.40
  -6  18   0   62.19    7.10
  -7  18   1    2.10    3.30
  -8  18   2    8.70    4.40
  -9  18   3   -2.70    3.70
 -10  18   4   18.30    6.60
   1  17  -6    1.60    8.10
   0  17  -5   -3.10    6.70
  -1  17  -4   28.50    8.40
  -2  17  -3   47.30    8.40
  -3  17  -2    8.80    4.60
  -4  17  -1    7.00    3.90
  -5  17   0   -0.10    3.30
  -6  17   1   17.90    4.40
  -7  17   2    0.50    3.70
  -8  17   3   11.80    4.80
  -9  17   4    6.40    5.30
 -10  17   5    7.60    6.10
   2  16  -6   -4.70    7.40
   1  16  -5   20.30    9.00
   0  16  -4   32.80    8.70
  -1  16  -3   10.90    5.40
  -2  16  -2   -0.30    3.70
  -3  16  -1   40.60    6.00
  -4  16   0  117.49    8.30
  -5  16   1   37.10    5.20
  -6  16   2   13.10    4.20
  -7  16   3    8.00    4.70
  -8  16   4   -3.90    3.80
  -9  16   5    5.90    5.60
   4  15  -7   -0.50    8.70
   3  15  -6   -3.60    7.60
   2  15  -5    3.70    6.80
   1  15  -4    5.80    6.30
   0 -15   3   11.50    3.60
   0  15  -3    7.30    5.50
   1 -15   2    0.40    2.90
  -1  15  -2    1.30    3.50
  -2  15  -1    5.20    3.30
  -3  15   0   -2.40    2.60
  -4  15   1  166.78    9.90
  -5  15   2   95.49    8.20
  -6  15   3    2.20    3.90
  -7  15   4   -0.30    4.00
  -8  15   5   -1.10    5.10
  -9  15   6    1.80    5.50
   5  14  -7    3.00    7.70
   4  14  -6   32.10   10.60
  -3 -14   5    7.50    3.10
   3  14  -5   11.50    7.20
  -2 -14   4    2.00    2.50
   2  14  -4    0.30    5.70
  -1 -14   3   18.70    3.70
   1  14  -3   16.50    5.70
   0 -14   2  151.88    9.20
   0  14  -2  139.29   10.80
   1 -14   1   60.49    5.80
  -1  14  -1   58.09    6.00
  -1  14  -1   58.09    6.20
  -2  14   0  141.19    8.80
  -3  14   1  141.69    8.70
  -4  14   2    5.90    3.40
  -5  14   3   50.49    6.80
  -6  14   4    6.20    4.60
  -7  14   5    5.10    5.20
  -8  14   6   -3.50    4.30
   6  13  -7   -3.30    8.50
   5  13  -6   -2.80    6.80
  -4 -13   5   10.00    3.10
   4  13  -5    9.40    7.10
  -3 -13   4   15.80    3.20
   3  13  -4   12.60    6.10
  -2 -13   3   50.19    5.20
   2  13  -3   56.59    8.70
  -1 -13   2  294.37   14.20
   1  13  -2  289.67   15.90
   1  13  -2  318.37   16.90
   0 -13   1   67.89    6.10
   0  13  -1   74.89    6.60
   0  13  -1   72.39    6.60
   1 -13   0    1.50    2.10
  -1  13   0    4.20    2.80
  -1  13   0    2.00    2.60
  -2  13   1    1.60    2.60
  -2  13   1   -0.30    2.50
  -3  13   2    2.90    3.00
  -4  13   3    4.70    3.60
  -5  13   4   23.40    5.40
  -6  13   5   31.10    6.90
  -7  13   6   -1.70    4.40
  -8  13   7   -5.30    5.10
   7  12  -7    5.50    8.50
   6  12  -6   -5.40    6.10
  -5 -12   5   -3.90    2.10
   5  12  -5    6.80    7.50
  -4 -12   4    4.10    2.50
   4  12  -4   11.70    5.80
  -3 -12   3  118.99    7.60
   3  12  -3  127.39   10.80
  -2 -12   2   20.30    3.30
   2  12  -2   27.30    4.30
   2  12  -2   21.90    5.10
  -1 -12   1  443.06   18.60
   1  12  -1  424.36   19.30
   1  12  -1  431.26   19.00
   0 -12   0  306.47   13.50
   0  12   0  300.67   13.90
   0  12   0  271.27   13.20
   1 -12  -1    3.80    2.30
  -1  12   1    1.30    2.40
  -1  12   1   -0.70    2.60
  -2  12   2  128.49    8.20
  -2  12   2  119.09    7.80
  -3  12   3   46.20    6.00
  -4  12   4    0.00    3.30
  -5  12   5   13.20    5.00
  -6  12   6   52.39    8.10
  -7  12   7   -0.80    5.70
   8  11  -7    8.40    9.20
   7  11  -6    7.90    8.40
  -6 -11   5   57.59    5.90
   6  11  -5   43.40   10.20
  -5 -11   4   81.89    6.30
   5  11  -4   64.29    9.50
  -4 -11   3   87.49    6.50
   4  11  -3   90.49    9.30
  -3 -11   2  669.73   26.50
   3  11  -2  670.53   27.10
   3  11  -2  670.23   29.00
  -2 -11   1 1107.99   40.30
   2  11  -1 1040.50   41.30
   2  11  -1 1052.19   40.80
  -1 -11   0   -0.70    1.70
   1  11   0    1.30    2.20
   1  11   0   -0.90    1.90
   0 -11  -1    8.40    2.40
   0  11   1    9.60    2.80
   0  11   1    9.40    2.50
   1 -11  -2  226.68   10.20
  -1  11   2  207.48   10.60
  -1  11   2  219.68   11.10
  -2  11   3   21.40    4.30
  -2  11   3   17.50    3.10
  -3  11   4    2.10    3.90
  -4  11   5   -1.10    3.70
  -5  11   6   -3.70    4.20
  -6  11   7   16.30    6.60
  -7  11   8    0.50    5.70
   9  10  -7   10.30    9.00
   8  10  -6   -3.70    5.90
  -7 -10   5   44.40    5.00
   7  10  -5   34.50    8.90
  -6 -10   4   33.90    4.40
   6  10  -4   26.90    7.90
  -5 -10   3  211.68   10.60
   5  10  -3  205.08   13.80
  -4 -10   2    2.50    2.00
   4  10  -2    1.80    2.00
   4  10  -2    0.20    3.30
  -3 -10   1  131.69    7.20
   3  10  -1  124.39    8.20
   3  10  -1  136.19    7.80
  -2 -10   0 1155.08   42.60
   2  10   0 1170.58   43.00
   2  10   0 1118.59   42.90
  -1 -10  -1   68.49    4.70
   1  10   1   70.49    4.80
   1  10   1   69.59    5.10
   0 -10  -2  274.07   11.50
   0  10   2  268.07   12.50
   0  10   2  267.77   12.10
   1 -10  -3    8.50    2.00
  -1  10   3    9.30    3.40
  -1  10   3    6.80    2.30
   2 -10  -4  171.18    7.10
  -2  10   4  144.99    9.90
  -2  10   4  150.28    8.10
  -3  10   5   15.90    4.90
  -4  10   6    1.40    4.20
  -5  10   7   -2.00    4.70
  -6  10   8    0.50    6.10
  10   9  -7   20.00    9.80
   9   9  -6   -6.90    7.10
  -8  -9   5   -2.50    2.30
   8   9  -5   -9.00    5.80
  -7  -9   4  254.07   12.30
   7   9  -4  245.78   17.40
  -6  -9   3  123.59    7.30
   6   9  -3   97.19    9.90
  -5  -9   2   62.89    5.20
   5   9  -2   67.49    7.30
   5   9  -2   62.49    5.10
   4   9  -1   52.79    5.50
  -3  -9   0    0.20    1.30
   3   9   0    1.60    1.90
   3   9   0   -0.40    1.30
  -2  -9  -1  103.79    5.50
   2   9   1  102.09    5.70
   2   9   1   97.09    5.80
  -1  -9  -2    9.40    1.80
   1   9   2    8.80    2.10
   1   9   2    7.00    2.40
   0  -9  -3  630.94   23.80
   0   9   3  643.74   26.00
   0   9   3  653.23   24.70
   1  -9  -4  138.19    6.50
  -1   9   4  183.98   10.30
  -1   9   4  180.88    8.00
  -2   9   5    1.90    1.70
  -2   9   5    2.80    4.00
  -3   9   6    6.00    4.50
  -4   9   7   13.70    6.00
  -5   9   8    1.30    6.00
  11   8  -7    8.20    8.70
  10   8  -6    7.70    7.90
  -9  -8   5   24.20    4.10
   9   8  -5   28.50    9.10
  -8  -8   4  116.09    7.60
   8   8  -4  103.29   12.40
  -7  -8   3    9.90    2.90
   7   8  -3   16.90    6.20
  -6  -8   2  331.37   14.20
   6   8  -2  308.47   16.80
   6   8  -2  343.47   14.50
  -5  -8   1   23.10    2.70
   5   8  -1   22.70    3.90
   5   8  -1   21.30    2.70
  -4  -8   0 1041.70   38.80
   4   8   0 1067.69   39.50
   4   8   0 1052.49   39.10
  -3  -8  -1  411.86   16.00
   3   8   1  410.16   16.20
   3   8   1  401.46   16.20
  -2  -8  -2  202.68    8.60
   2   8   2  197.88    9.00
   2   8   2  215.98    9.60
  -1  -8  -3  306.77   11.70
   1   8   3  289.87   12.30
   1   8   3  308.67   13.80
   0   8   4   51.39    5.70
   0   8   4   48.80    3.70
  -1   8   5   54.49    7.10
  -1   8   5   43.70    3.50
  -2   8   6   -0.80    4.00
  -3   8   7    7.50    5.30
  -4   8   8   -3.60    5.00
  -5   8   9   11.60    7.00
  12   7  -7    5.20    9.10
  11   7  -6    2.90    7.10
 -10  -7   5   -0.60    2.80
  10   7  -5   -0.50    6.00
  -9  -7   4    0.00    2.10
   9   7  -4   -2.20    5.00
  -8  -7   3  369.96   16.00
   8   7  -3  356.66   20.00
  -7  -7   2  263.87   11.90
   7   7  -2  281.57   12.10
   7   7  -2  234.58   14.20
  -6  -7   1  323.27   13.30
   6   7  -1  314.67   13.40
   6   7  -1  307.07   14.70
  -5  -7   0    1.50    1.30
   5   7   0   -0.50    1.10
   5   7   0    0.30    1.60
  -4  -7  -1 1047.00   37.80
   4   7   1 1020.00   37.90
   4   7   1 1039.20   38.00
  -3  -7  -2  734.63   27.10
   3   7   2  739.83   27.40
   3   7   2  738.83   27.80
  -2  -7  -3  262.57   10.50
   2   7   3  275.87   12.40
   2   7   3  282.57   11.00
   1   7   4  513.45   19.30
   1   7   4  513.05   21.90
   0   7   5   93.29    4.60
   0   7   5   95.49    7.90
  -1   7   6   -1.30    3.80
   2  -7  -7    2.70    6.80
   3  -7  -8    9.20    8.40
   4  -7  -9   12.90   10.80
  13   6  -7   15.10   10.40
  12   6  -6   58.89   12.20
 -11  -6   5   46.30    5.50
  11   6  -5   27.80    9.60
 -10  -6   4    6.30    2.90
  10   6  -4    7.00    5.90
  -9  -6   3   78.69    6.30
   9   6  -3   70.49    9.30
  -8  -6   2   21.90    3.20
   8   6  -2   22.10    5.20
   8   6  -2   25.50    3.40
  -7  -6   1    0.10    1.60
   7   6  -1    0.40    2.60
   7   6  -1    3.80    1.70
  -6  -6   0   29.10    3.00
   6   6   0   33.20    3.10
   6   6   0   45.90    4.00
  -5  -6  -1   15.30    2.00
   5   6   1   11.70    1.70
   5   6   1   13.40    1.90
  -4  -6  -2   26.30    2.30
   4   6   2   26.10    2.50
   4   6   2   23.90    2.30
   3   6   3  181.08    7.60
   3   6   3  181.68    8.80
   2   6   4   91.29    4.30
   2   6   4   87.39    6.70
   1   6   5   40.00    5.90
   0  -6  -6   10.10    6.60
   1  -6  -7   -3.80    6.20
   2  -6  -8   11.80    9.50
   3  -6  -9   -6.70    6.80
  14   5  -7    8.00    9.10
  13   5  -6    4.70    7.90
 -12  -5   5    8.30    3.70
  12   5  -5    5.70    8.10
 -11  -5   4   80.19    6.90
  11   5  -4   76.39   11.70
 -10  -5   3   -0.60    2.30
  10   5  -3   -0.10    5.40
  -9  -5   2   84.29    6.30
   9   5  -2   88.69    9.00
   9   5  -2   80.29    5.70
  -8  -5   1   -1.50    1.50
   8   5  -1   -1.50    2.40
   8   5  -1   -0.80    1.30
  -7  -5   0   -0.70    1.30
   7   5   0   -0.40    1.10
   7   5   0   -2.80    1.70
  -6  -5  -1   43.70    3.30
   6   5   1   45.20    3.20
   6   5   1   46.10    3.20
  -5  -5  -2   30.60    2.50
   5   5   2   29.30    2.30
   5   5   2   30.60    2.50
   4   5   3  230.88   10.10
   4   5   3  230.38    9.10
   3   5   4   99.99    4.40
   3   5   4  105.49    6.80
  -2  -5  -5   78.09    9.60
  -1  -5  -6    7.40    6.10
   0  -5  -7    6.90    7.30
   1  -5  -8    3.30    8.00
   2  -5  -9   -5.10    8.40
  15   4  -7   -0.50    9.30
  14   4  -6   -7.10    8.10
 -13  -4   5   -2.70    3.00
  13   4  -5    0.80    6.80
 -12  -4   4   -1.00    2.60
  12   4  -4   -3.60    5.20
 -11  -4   3   65.99    6.30
  11   4  -3   64.19    9.80
  10   4  -2    5.90    2.00
  -9  -4   1  581.54   23.40
   9   4  -1  576.24   25.10
   9   4  -1  607.14   23.20
  -8  -4   0  496.95   20.10
   8   4   0  504.85   20.70
   8   4   0  521.15   20.00
  -7  -4  -1  809.42   31.10
   7   4   1  846.22   30.80
   7   4   1  838.22   30.90
  -6  -4  -2  571.14   21.90
   6   4   2  578.54   21.70
   6   4   2  583.94   21.10
   5   4   3   38.10    2.70
   5   4   3   38.30    3.10
   4   4   4   19.40    1.70
   4   4   4   18.70    3.50
  -3  -4  -5  113.59   10.50
  -2  -4  -6  195.68   15.00
  -1  -4  -7   48.40   10.20
   0  -4  -8   -0.30    7.10
   1  -4  -9   -0.40    9.20
  15   3  -6   11.00    9.40
  14   3  -5   38.20   11.40
 -13  -3   4   42.40    5.50
  13   3  -4   24.20    8.20
 -12  -3   3   45.80    5.50
  12   3  -3   32.60    8.30
 -11  -3   2  888.21   34.50
  11   3  -2  846.22   35.40
  11   3  -2  901.91   37.90
 -10  -3   1 1313.77   49.30
  10   3  -1 1319.37   51.09
  10   3  -1 1321.07   48.90
  -9  -3   0    0.70    1.90
   9   3   0   -0.10    1.30
   9   3   0   -0.70    2.20
  -8  -3  -1  365.56   15.20
   8   3   1  367.66   14.90
  -7  -3  -2   63.39    4.30
   7   3   2   67.89    4.10
   7   3   2   62.69    3.10
   6   3   3    4.00    1.40
   6   3   3    1.90    1.20
   5   3   4  232.68    9.40
   5   3   4  236.08   10.60
  -4  -3  -5   25.20    5.80
  -3  -3  -6    0.50    4.70
  -2  -3  -7   40.80    9.20
  -1  -3  -8   28.30    9.60
   0  -3  -9    0.20    8.20
  16   2  -6    0.50    9.60
  15   2  -5   -3.60    8.00
 -14  -2   4    0.80    3.10
  14   2  -4    8.90    6.40
 -13  -2   3   92.69    8.10
  13   2  -3  112.59   13.10
 -12  -2   2  133.19    9.00
  12   2  -2  116.19   11.40
 -11  -2   1  865.71   33.90
  11   2  -1  850.61   33.20
  11   2  -1  877.31   35.80
 -10  -2   0 3173.78  114.89
  10   2   0 3153.98  114.39
  10   2   0 3257.17  115.39
  -9  -2  -1  830.22   32.40
   9   2   1  843.02   31.90
   9   2   1  865.21   31.50
   8   2   2   64.79    4.30
   7   2   3    5.80    1.70
   6   2   4  204.18    8.60
   6   2   4  203.08    9.10
   6   2   4  191.98    8.70
  -5  -2  -5    4.20    4.00
   5   2   5   -1.30    1.20
   5   2   5   -1.00    1.30
  -4  -2  -6   -0.60    4.90
  -3  -2  -7   -1.60    6.10
  -2  -2  -8    0.60    7.00
  -1  -2  -9    5.70    8.10
  17   1  -6   -6.30    7.90
  16   1  -5    7.40    9.50
 -15  -1   4   20.00    5.00
  15   1  -4   19.30    9.50
 -14  -1   3   82.29    7.90
  14   1  -3   58.19   10.50
 -13  -1   2    3.10    3.30
  13   1  -2   -0.10    4.80
 -12  -1   1   -1.00    2.90
  12   1  -1   -4.90    4.40
  12   1  -1   -1.30    2.40
 -11  -1   0   -0.40    2.70
  11   1   0   -0.70    2.90
  11   1   0   -1.40    1.80
  10   1   1  696.83   26.80
  10   1   1  684.53   25.90
   9   1   2  510.25   20.30
   8   1   3    6.90    2.10
   8   1   3    7.30    2.20
   7   1   4   49.40    4.20
   7   1   4   47.70    3.50
   7   1   4   46.70    4.30
  -6  -1  -5   17.90    4.70
   6   1   5   19.90    2.50
   6   1   5   18.50    2.50
  -5  -1  -6    6.30    4.80
   5   1   6    7.10    1.70
   5   1   6    3.90    1.40
  -4  -1  -7   10.30    6.10
  -3  -1  -8    7.30    7.10
  18   0  -6    8.60   10.80
  17   0  -5  -16.70    7.90
 -16   0   4   33.60    6.30
  16   0  -4   36.70   10.40
 -15   0   3    8.60    4.10
  15   0  -3   -3.00    6.20
 -14   0   2  156.28   10.40
  14   0  -2  137.99   12.70
 -13   0   1   86.69    8.00
  13   0  -1   84.29    6.60
  13   0  -1   88.99    9.20
  13   0  -1   89.49    7.70
  12   0   0  282.67   14.40
  12   0   0  288.37   13.40
  11   0   1   14.80    3.00
  10   0   2  271.27   12.80
  10   0   2  275.47   12.50
   9   0   3  659.43   25.80
   9   0   3  663.13   26.10
   8   0   4   52.19    4.90
   8   0   4   51.49    3.00
   8   0   4   55.09    4.80
  -7   0  -5   87.59    7.50
   7   0   5   84.99    5.70
   7   0   5   85.99    5.60
  -6   0  -6    8.50    4.20
   6   0   6    5.80    2.10
   6   0   6    6.00    1.90
  -5   0  -7    5.40    6.30
   5   0   7    1.00    1.20
   5   0   7    2.90    1.80
  18  -1  -5    6.60    9.80
  17  -1  -4    9.10    8.70
  16  -1  -3   43.10    9.80
  15  -1  -2   66.69   10.00
  14  -1  -1   28.60    5.20
  14  -1  -1   21.70    5.70
  13  -1   0   -5.90    3.10
  13  -1   0   -4.30    2.40
  13  -1   0    1.10    2.30
 -12   1  -1  414.96   16.30
  12  -1   1  441.06   19.40
  12  -1   1  452.75   19.00
  11  -1   2  579.44   24.10
  11  -1   2  613.54   24.70
  10  -1   3  657.83   26.20
  10  -1   3  661.53   26.70
   9  -1   4  804.72   30.10
   9  -1   4  742.63   30.10
   8  -1   5  286.77   13.10
   8  -1   5  294.77   13.10
   7  -1   6   13.00    2.40
  19  -2  -5    4.20    9.90
  18  -2  -4    1.20    8.30
  17  -2  -3   19.50    8.70
  16  -2  -2   -3.20    5.50
  15  -2  -1   21.90    5.90
 -14   2   0   15.40    3.10
  14  -2   0    5.50    2.60
  14  -2   0    8.00    3.60
  13  -2   1  213.28   11.60
  13  -2   1  219.98   12.50
  12  -2   2   24.80    4.40
  12  -2   2   38.50    5.70
  11  -2   3   28.20    4.20
  11  -2   3   28.90    4.30
  10  -2   4   68.49    6.40
   9  -2   5  110.09    7.20
   8  -2   6  106.29    6.90
  19  -3  -4   28.00   11.40
  18  -3  -3   22.60    9.30
  17  -3  -2   44.10    9.20
  15  -3   0   -0.80    3.80
  14  -3   1   20.70    4.90
  13  -3   2  269.87   14.00
  12  -3   3  120.39    8.60
  11  -3   4    4.90    2.90
  10  -3   5   -2.10    2.20
  15  -4   1    5.00    3.80
  14  -4   2   42.70    6.30
  13  -4   3    0.20    3.00
  12  -4   4    8.50    3.40
  11  -4   5    3.80    2.80
  16  -5   1   16.10    4.90
  15  -5   2   -2.60    3.30
  14  -5   3   11.90    4.00
  13  -5   4   21.90    4.60
  16  -6   2    2.90    3.50
  15  -6   3    1.90    3.60
  14  -6   4   10.50    4.20
  16  -7   3    4.20    3.70
  -4  21  -3   -1.40    6.90
  -5  21  -2   14.20    7.10
  -6  21  -1   14.10    6.00
  -7  21   0   -7.90    4.60
  -8  21   1   -4.40    4.50
  -2  20  -4   14.70    8.00
  -3  20  -3   -3.60    6.30
  -4  20  -2   -2.60    5.30
  -5  20  -1   35.30    7.60
  -6  20   0   62.79    8.50
  -7  20   1    8.60    4.90
  -8  20   2    2.70    4.50
  -9  20   3    7.10    5.00
   0  19  -5    5.80    8.10
  -1  19  -4   25.80    8.70
  -2  19  -3   29.40    7.90
  -3  19  -2    4.00    5.50
  -4  19  -1   -0.90    4.70
  -5  19   0   -0.10    4.10
  -6  19   1   47.60    7.00
  -7  19   2   14.80    4.90
  -8  19   3    9.30    4.90
  -9  19   4    6.10    5.40
   2  18  -6    5.10    8.90
   1  18  -5  -13.00    5.50
   0  18  -4    1.70    6.00
  -1  18  -3   24.70    7.30
  -2  18  -2   81.49    9.40
  -3  18  -1    3.10    4.10
  -4  18   0    4.30    3.70
  -5  18   1   17.00    4.70
  -6  18   2   23.60    5.70
  -7  18   3   18.80    5.20
  -8  18   4    4.50    4.50
   3  17  -6    7.80    9.10
   2  17  -5    3.60    7.40
   1  17  -4   -4.30    5.30
   0  17  -3   67.09    9.90
  -1  17  -2   19.40    5.70
  -2  17  -1    7.90    4.10
  -3  17   0    1.90    3.10
  -4  17   1    2.40    3.40
  -5  17   2   -0.20    3.70
  -6  17   3   14.40    5.30
  -7  17   4   33.80    6.70
  -8  17   5    3.80    5.00
   4  16  -6    8.90    8.80
   3  16  -5    5.90    7.10
   2  16  -4   16.90    7.40
   1  16  -3   82.09   11.00
   0  16  -2    6.70    4.60
  -1  16  -1    4.60    3.50
  -2  16   0    0.40    3.20
  -3  16   1   44.10    5.60
  -4  16   2   -1.60    3.00
  -5  16   3   -0.10    3.40
  -6  16   4    3.50    4.70
  -7  16   5   18.20    6.40
  -8  16   6   12.80    6.30
   6  15  -7    1.20    7.90
   5  15  -6    2.10    8.30
   4  15  -5   13.90    7.60
  -3 -15   4   21.90    4.00
   3  15  -4   17.60    7.10
  -2 -15   3   13.10    3.30
   2  15  -3   14.30    5.70
   1  15  -2   76.99    9.00
   0  15  -1   66.69    7.20
  -1  15   0   -3.10    2.20
  -2  15   1    8.70    3.30
  -3  15   2  199.58   11.40
  -4  15   3   46.90    6.70
  -5  15   4    4.60    4.60
  -6  15   5    0.80    4.10
  -7  15   6   -1.70    4.40
   7  14  -7   -1.50    8.40
   6  14  -6   17.20    8.80
  -5 -14   5   25.20    6.60
   5  14  -5   25.80    9.80
  -4 -14   4    0.50    2.20
   4  14  -4    7.50    6.40
  -3 -14   3   24.90    3.90
   3  14  -3   20.50    6.10
  -2 -14   2    0.00    2.10
   2  14  -2    4.40    3.70
  -1 -14   1   18.60    3.40
   1  14  -1   15.80    3.60
   1  14  -1   17.70    4.10
   0  14   0   19.00    3.70
  -1  14   1   50.29    5.10
  -2  14   2   61.99    6.00
  -3  14   3   12.50    4.30
  -4  14   4   32.10    6.40
  -5  14   5   -1.40    4.60
  -6  14   6    3.00    4.90
  -7  14   7   -0.20    4.80
   8  13  -7    7.30    8.70
   7  13  -6   -4.40    6.40
  -6 -13   5    2.50    2.80
   6  13  -5    4.00    7.70
  -5 -13   4   19.40    3.90
   5  13  -4   16.80    6.60
  -4 -13   3   -1.70    2.00
   4  13  -3   -2.00    4.00
  -3 -13   2  270.57   12.80
   3  13  -2  248.78   14.80
  -2 -13   1  225.78   11.10
   2  13  -1  215.08   12.20
   2  13  -1  212.58   11.70
  -1 -13   0   -1.20    1.80
   1  13   0    1.30    2.10
   1  13   0   -1.70    2.40
   0  13   1   69.19    6.20
   0  13   1   76.49    6.20
  -1  13   2    5.30    3.50
  -2  13   3   81.49    7.10
  -3  13   4   41.90    6.20
  -4  13   5    5.70    4.50
  -5  13   6    1.30    5.10
  -6  13   7    7.90    6.10
   9  12  -7   -2.90    7.50
   8  12  -6    6.60    8.50
  -7 -12   5   14.70    3.80
   7  12  -5   13.60    8.10
  -6 -12   4   26.30    4.10
  -5 -12   3   33.20    4.40
   5  12  -3   28.60    6.50
  -4 -12   2    3.50    2.30
   4  12  -2    2.60    4.40
   4  12  -2    3.30    2.30
  -3 -12   1  435.66   18.10
   3  12  -1  424.66   19.70
   3  12  -1  414.96   18.50
  -2 -12   0 1423.66   52.39
   2  12   0 1397.36   53.09
   2  12   0 1424.86   53.09
  -1 -12  -1  409.16   16.70
   1  12   1  397.16   17.00
   1  12   1  388.76   17.30
   0 -12  -2   -1.80    1.70
   0  12   2    0.40    3.00
   0  12   2    1.00    2.10
  -1  12   3   68.19    6.90
  -2  12   4    3.80    3.80
  -3  12   5    5.60    4.20
  -4  12   6    6.20    4.80
  -5  12   7   15.50    6.70
  -6  12   8   -2.30    5.40
  10  11  -7   -1.30    8.80
   9  11  -6   -3.00    7.20
  -8 -11   5    0.50    2.60
   8  11  -5    2.30    6.40
  -7 -11   4   45.90    5.10
   7  11  -4   44.30    9.40
  -6 -11   3   -0.90    2.00
   6  11  -3   -2.80    4.50
  -5 -11   2   56.29    5.20
   5  11  -2   39.90    6.80
   5  11  -2   48.00    5.20
  -4 -11   1  186.88    9.40
   4  11  -1  185.38    9.80
   4  11  -1  175.78   10.70
  -3 -11   0   -0.10    1.70
   3  11   0    0.20    1.80
   3  11   0   -4.20    2.00
  -2 -11  -1 1043.70   39.30
   2  11   1 1049.09   39.70
   2  11   1 1072.09   40.00
  -1 -11  -2  601.44   23.10
   1  11   2  578.64   23.60
   1  11   2  609.34   24.20
   0 -11  -3    0.60    1.30
   0  11   3    2.60    3.40
   0  11   3    2.80    2.00
  -1  11   4    9.70    3.70
  -1  11   4   10.30    2.50
  -2  11   5   11.50    4.40
  -3  11   6   -0.10    4.60
  -4  11   7    2.50    5.00
  -5  11   8    7.50    6.40
  11  10  -7    6.10    9.20
  10  10  -6   46.30   11.70
  -9 -10   5    5.40    3.00
   9  10  -5    1.00    6.40
  -8 -10   4   -2.10    2.30
   8  10  -4   -3.30    5.80
  -7 -10   3  263.57   12.70
   7  10  -3  264.87   16.80
  -6 -10   2  226.78   11.20
   6  10  -2  243.88   14.00
   6  10  -2  220.68   11.40
  -5 -10   1   19.40    3.10
   5  10  -1   20.40    3.20
   5  10  -1   16.60    4.60
  -4 -10   0  153.68    7.90
   4  10   0  161.58    9.00
   4  10   0  149.39    8.20
  -3 -10  -1  138.09    6.80
   3  10   1  120.79    6.90
   3  10   1  131.09    7.20
  -2 -10  -2  181.08    8.30
   2  10   2  181.98    9.30
   2  10   2  185.68    8.90
  -1 -10  -3  656.33   24.60
   1  10   3  644.24   25.30
   1  10   3  669.93   26.60
   0  10   4   14.40    3.90
   0  10   4   18.70    2.80
  -1  10   5   18.10    4.50
  -1  10   5   17.50    2.70
  -2  10   6   -2.90    4.00
  -3  10   7   -0.30    5.10
  -4  10   8    5.00    6.20
  12   9  -7    4.90    8.60
  11   9  -6    3.60    8.40
 -10  -9   5   12.40    3.70
  10   9  -5    8.40    7.80
  -9  -9   4    2.20    2.40
   9   9  -4   -7.70    5.40
  -8  -9   3  135.29    8.30
   8   9  -3  130.99   12.50
  -7  -9   2   88.59    6.40
   7   9  -2   80.49    6.40
   7   9  -2   82.49    9.30
  -6  -9   1  118.29    6.90
   6   9  -1  116.59    7.10
   6   9  -1  124.49    9.00
  -5  -9   0   -2.10    1.40
   5   9   0   -2.40    2.20
   5   9   0   -1.00    1.50
  -4  -9  -1   54.29    4.00
   4   9   1   52.79    4.10
   4   9   1   56.89    4.40
  -3  -9  -2    8.70    1.70
   3   9   2   -1.30    1.90
   3   9   2    3.10    1.50
  -2  -9  -3   73.29    4.20
   2   9   3   79.69    6.10
   2   9   3   75.59    4.90
  -1  -9  -4  734.93   25.80
   1   9   4  703.43   29.10
   1   9   4  703.03   26.90
   0   9   5  179.38    8.20
   0   9   5  176.98   11.30
  -1   9   6   -0.70    3.70
  -2   9   7    0.20    5.10
  -3   9   8    2.90    5.40
  13   8  -7   -4.80    7.80
  12   8  -6    6.50    8.00
 -11  -8   5    1.20    2.90
  11   8  -5    6.60    8.00
 -10  -8   4   34.30    4.50
  10   8  -4   37.70    9.10
  -9  -8   3  167.08    9.30
   9   8  -3  140.99   13.20
  -8  -8   2   18.90    3.40
   8   8  -2   23.50    6.20
   8   8  -2   30.90    4.10
  -7  -8   1  465.65   18.90
   7   8  -1  457.65   19.00
   7   8  -1  463.85   20.70
  -6  -8   0   61.69    4.50
   6   8   0   59.89    5.10
   6   8   0   59.69    4.50
  -5  -8  -1   27.50    2.90
   5   8   1   23.90    3.00
   5   8   1   31.50    3.10
  -4  -8  -2   19.20    2.30
   4   8   2   19.90    2.70
   4   8   2   17.70    2.30
  -3  -8  -3    9.20    1.60
   3   8   3    5.40    2.80
   3   8   3    7.50    1.70
   2   8   4    3.10    3.00
   2   8   4    1.00    1.40
   1   8   5  262.77   13.80
   1   8   5  265.47   10.70
   0   8   6  165.48   11.10
  -1   8   7   10.90    5.50
  -2   8   8   -3.70    5.70
  -3   8   9    4.00    6.70
  14   7  -7    5.50   10.00
  13   7  -6    1.20    8.30
 -12  -7   5   64.79    7.40
  12   7  -5   55.49   11.10
 -11  -7   4   60.09    6.20
  11   7  -4   56.59   10.10
 -10  -7   3  202.38   11.00
  10   7  -3  217.68   15.50
  -9  -7   2  907.91   34.60
   9   7  -2  870.61   37.40
   9   7  -2  901.01   34.40
  -8  -7   1  511.25   20.30
   8   7  -1  489.65   22.00
   8   7  -1  500.55   20.20
  -7  -7   0    0.10    1.40
   7   7   0   -2.10    2.20
   7   7   0   -2.10    1.20
  -6  -7  -1  321.77   13.20
   6   7   1  317.97   13.20
   6   7   1  316.37   13.10
  -5  -7  -2  428.16   16.90
   5   7   2  434.96   16.90
   5   7   2  442.16   17.00
  -4  -7  -3  185.48    7.60
   4   7   3  168.48    7.80
   4   7   3  182.18    8.70
   3   7   4   31.60    4.50
   3   7   4   32.70    2.80
   2   7   5    6.50    1.30
   2   7   5    7.60    3.60
   1   7   6    1.10    4.00
   0   7   7   37.40    7.20
  -1   7   8   12.40    6.60
  -2   7   9    7.30    6.30
  15   6  -7   24.20   11.70
  14   6  -6   -1.30    8.60
  13   6  -5   46.20   10.80
 -12  -6   4    1.40    2.80
  12   6  -4    4.20    6.80
 -11  -6   3   27.30    4.40
  11   6  -3   28.40    7.70
 -10  -6   2   95.39    7.00
  10   6  -2   78.29    9.30
  10   6  -2   84.59    6.20
  -9  -6   1  135.79    7.70
   9   6  -1  116.79    7.00
  -8  -6   0  251.37   11.20
   8   6   0  238.98   11.80
   8   6   0  243.38   10.90
  -7  -6  -1    2.90    1.50
   7   6   1    2.30    1.30
   7   6   1    2.30    1.70
  -6  -6  -2   -0.40    1.10
   6   6   2    0.90    1.20
   6   6   2    1.40    1.20
  -5  -6  -3   92.19    4.80
   5   6   3   94.69    5.40
   5   6   3   98.09    4.80
   4   6   4  229.98    9.30
   4   6   4  234.08   11.10
   3   6   5    7.80    3.60
   2   6   6    7.30    4.20
  -1  -6  -7    4.60    6.90
   0  -6  -8   -2.50    7.70
   1  -6  -9   13.00    9.70
  15   5  -6    2.90    8.90
  14   5  -5    2.70    7.40
 -13  -5   4   25.90    4.70
  13   5  -4   25.60    8.70
 -12  -5   3   71.39    6.70
  12   5  -3   70.99   10.40
  11   5  -2   12.80    5.30
 -10  -5   1  101.79    7.00
  10   5  -1  100.39    6.40
  10   5  -1  105.59    8.90
  -9  -5   0   -2.70    1.90
   9   5   0   -5.20    2.40
   9   5   0   -2.90    1.30
  -8  -5  -1   -1.80    1.40
   8   5   1   -1.50    1.20
   8   5   1   -0.20    1.50
  -7  -5  -2   92.49    5.30
   7   5   2   89.39    5.00
   7   5   2   95.69    4.60
  -6  -5  -3  273.27   11.10
   6   5   3  266.67   11.00
   6   5   3  273.47   10.90
   5   5   4   62.99    3.60
   5   5   4   65.89    5.00
   4   5   5   15.20    3.80
   3   5   6    5.20    3.90
  -2  -5  -7   -5.70    6.00
  -1  -5  -8   10.30    8.30
   0  -5  -9    2.30    9.00
  16   4  -6    1.10    8.00
  15   4  -5   -1.30    8.30
 -14  -4   4   34.60    5.20
  14   4  -4   34.40    9.80
 -13  -4   3    4.30    3.10
  13   4  -3    6.80    5.30
 -12  -4   2    0.60    2.80
  12   4  -2   -2.40    4.60
 -11  -4   1  288.67   14.00
  11   4  -1  294.47   13.20
  11   4  -1  289.77   15.60
 -10  -4   0 1200.48   44.30
  10   4   0 1153.08   43.70
  10   4   0 1168.58   44.80
  -9  -4  -1  578.34   23.10
   9   4   1  581.34   22.80
   9   4   1  591.44   22.80
  -8  -4  -2  416.56   16.90
   8   4   2  420.36   15.80
   8   4   2  407.56   16.50
   7   4   3  263.27   10.90
   7   4   3  261.87   10.20
   6   4   4    6.10    1.60
   6   4   4    7.20    2.20
   5   4   5   38.00    2.80
   5   4   5   41.40    4.80
   5   4   5   36.50    2.40
  -4  -4  -6    0.90    5.10
  -3  -4  -7   41.70    9.20
  -2  -4  -8    7.10    7.90
  -1  -4  -9    2.20    8.10
  17   3  -6   -5.70    9.10
  16   3  -5   -9.60    6.60
 -15  -3   4    3.50    3.50
  15   3  -4    5.00    8.20
 -14  -3   3   12.30    4.00
  14   3  -3   15.10    7.10
 -13  -3   2    5.30    2.90
  13   3  -2   12.30    5.40
 -12  -3   1   87.09    7.30
  12   3  -1   83.69    6.40
  12   3  -1   93.29    8.90
 -11  -3   0   -3.60    2.40
  11   3   0   -2.70    1.80
  11   3   0   -2.60    2.90
 -10  -3  -1 1312.07   49.20
  10   3   1 1315.27   48.40
  10   3   1 1324.87   48.70
  -9  -3  -2 1680.33   63.39
   9   3   2 1687.43   62.99
   9   3   2 1800.12   62.09
   9   3   2 1769.12   61.79
   8   3   3  734.83   26.00
   8   3   3  711.83   27.30
   7   3   4  429.56   16.40
   7   3   4  416.46   16.50
   6   3   5  148.89    7.00
   6   3   5  153.18    8.40
   6   3   5  157.08    6.80
  -5  -3  -6   13.00    5.40
  -4  -3  -7   -3.80    5.30
  -3  -3  -8   25.40    9.10
  18   2  -6   21.70   12.10
  17   2  -5   13.70   10.80
 -16  -2   4    1.90    3.50
  16   2  -4    4.80    8.00
 -15  -2   3   46.90    6.40
  15   2  -3   50.99   10.50
 -14  -2   2   61.69    7.20
  14   2  -2   74.99   10.20
 -13  -2   1    9.90    3.60
  13   2  -1    5.70    2.40
  13   2  -1   -0.60    4.10
 -12  -2   0  125.99    8.60
  12   2   0  105.49    8.50
  12   2   0  120.89    7.50
 -11  -2  -1  855.41   33.50
  11   2   1  855.31   32.20
  11   2   1  852.81   32.80
   9   2   3  488.35   19.40
   8   2   4  165.48    8.30
   8   2   4  168.08    6.90
   8   2   4  171.98    8.10
   7   2   5    2.40    2.40
   7   2   5    1.10    1.60
   7   2   5    5.90    1.90
  -6  -2  -6    8.30    4.60
   6   2   6    3.90    1.40
   6   2   6    4.20    1.50
  -5  -2  -7    1.10    5.30
  18   1  -5   27.90   11.90
  17   1  -4   31.90   10.70
 -16  -1   3    1.40    3.60
  16   1  -3   -2.00    6.80
 -15  -1   2   -0.20    3.30
  15   1  -2   -3.70    4.90
 -14  -1   1   53.49    6.60
  14   1  -1   59.59    8.00
 -13  -1   0   -1.50    2.80
  13   1   0   -0.80    2.00
  13   1   0    1.40    3.70
  12   1   1    2.70    2.70
  12   1   1   -3.90    2.40
  11   1   2  220.88   11.20
  11   1   2  249.68   12.10
  10   1   3   11.00    2.80
  10   1   3   12.50    3.10
   9   1   4  188.78    9.20
   9   1   4  182.78    9.60
   8   1   5   50.59    4.40
   8   1   5   45.70    4.40
   7   1   6    1.30    1.80
   7   1   6   -0.50    1.60
   6   1   7   -1.00    1.20
   6   1   7    0.20    1.50
  19   0  -5    1.10    8.80
  18   0  -4    7.40    9.10
  17   0  -3   73.09   12.10
  16   0  -2   -1.50    5.80
  15   0  -1   66.59    7.50
  15   0  -1   68.49    8.60
  14   0   0   25.90    5.10
  14   0   0   17.00    4.40
  14   0   0   23.00    4.00
  13   0   1   83.99    7.30
  13   0   1   69.89    6.20
  12   0   2   -0.90    2.30
  12   0   2   -0.50    2.60
  11   0   3    5.00    2.90
  11   0   3   -1.30    2.20
  10   0   4   25.90    3.70
   9   0   5  180.28    9.50
   8   0   6  168.98    8.80
  19  -1  -4   -4.00    7.80
  18  -1  -3    1.50    7.20
  17  -1  -2  167.68   15.10
  16  -1  -1   94.19   10.40
  15  -1   0    1.60    3.20
  14  -1   1   18.10    4.10
  13  -1   2  276.07   14.50
  12  -1   3  134.59    9.30
  11  -1   4   18.00    3.60
  10  -1   5   14.60    3.30
   9  -1   6    1.40    2.30
  19  -2  -3   12.90   11.00
  16  -2   0  104.59    9.80
  15  -2   1   24.80    5.50
  14  -2   2    5.00    4.00
  13  -2   3   55.79    6.00
  12  -2   4   72.59    7.00
  11  -2   5   43.70    5.10
  16  -3   1   50.29    7.40
  15  -3   2   15.50    4.40
  14  -3   3   21.40    4.60
  13  -3   4   21.60    4.50
  12  -3   5    3.90    3.50
  16  -4   2   22.90    5.30
  15  -4   3   54.79    7.00
  14  -4   4    3.10    3.40
  17  -5   2   63.59    8.60
  16  -5   3   26.20    5.30
  -4  22  -2   -1.20    5.40
  -5  22  -1    0.30    5.10
  -6  22   0    5.40    5.90
  -1  21  -4    1.80    7.50
  -2  21  -3    2.30    6.80
  -3  21  -2    0.50    6.30
  -4  21  -1   20.90    6.80
  -5  21   0    2.90    4.70
  -6  21   1   18.10    6.10
  -7  21   2    5.80    4.50
   0  20  -4    7.60    8.00
  -1  20  -3   46.10    9.40
  -2  20  -2   17.90    7.20
  -3  20  -1    5.20    4.90
  -4  20   0   34.90    7.00
  -5  20   1   28.00    6.30
  -6  20   2    0.30    4.40
  -7  20   3    8.90    4.70
   2  19  -5    7.00    7.90
   1  19  -4   -0.50    6.40
   0  19  -3    0.90    5.50
  -1  19  -2    6.40    5.30
  -2  19  -1   25.80    6.60
  -3  19   0   -0.50    4.00
  -4  19   1   -0.40    4.00
  -5  19   2   53.89    7.10
  -6  19   3    0.30    4.70
  -7  19   4   10.60    5.10
   3  18  -5    6.90    8.30
   2  18  -4    8.80    7.50
   1  18  -3    6.20    6.10
   0  18  -2   17.80    6.10
  -1  18  -1    7.20    4.50
  -2  18   0    5.20    3.90
  -3  18   1    9.60    3.90
  -4  18   2    4.40    4.20
  -5  18   3   19.30    5.60
  -6  18   4   11.20    5.50
  -7  18   5    9.20    5.80
   5  17  -6    4.40    9.20
   3  17  -4   -3.90    6.00
   2  17  -3    9.40    6.60
   1  17  -2  143.49   11.80
   0  17  -1   30.90    5.80
  -1  17   0    1.60    3.20
  -2  17   1    1.50    3.40
  -3  17   2    8.80    4.10
  -4  17   3    5.20    4.00
  -5  17   4    0.70    4.40
  -6  17   5   12.70    5.90
   6  16  -6   -5.60    7.80
   5  16  -5   -8.10    5.90
   4  16  -4   -1.20    5.40
   3  16  -3   -0.50    5.40
   2  16  -2   -2.00    4.60
   1  16  -1  104.89    9.00
   0  16   0  110.59    8.70
  -1  16   1    0.80    2.90
  -2  16   2   -0.90    3.40
  -3  16   3   15.70    4.90
  -4  16   4   14.50    4.80
  -5  16   5    5.70    5.20
  -6  16   6   12.60    5.90
   7  15  -6  -11.20    6.80
   6  15  -5    1.70    7.50
   5  15  -4   30.50    8.40
   4  15  -3   64.19    9.80
   3  15  -2    9.10    4.80
   2  15  -1   21.40    5.00
   1  15   0    0.20    2.50
   0  15   1   56.39    5.50
  -1  15   2    0.90    2.80
  -2  15   3   39.00    5.80
  -3  15   4    4.30    4.10
  -4  15   5   -1.10    4.70
  -5  15   6    4.50    5.70
  -6  15   7    7.10    5.30
   8  14  -6   -1.60    8.50
   7  14  -5    3.40    7.80
  -6 -14   4   16.10    3.80
   6  14  -4   10.80    7.20
  -5 -14   3   11.50    3.30
   5  14  -3   15.40    6.60
  -4 -14   2   24.80    3.90
   4  14  -2   42.10    7.10
  -3 -14   1   22.60    4.50
   3  14  -1   20.20    4.60
   2  14   0   15.50    3.70
   1  14   1   20.70    3.70
   0  14   2  154.28    9.50
  -1  14   3   70.99    6.70
  -2  14   4    4.30    3.70
  -3  14   5   38.30    6.70
  -4  14   6   -7.00    4.50
  -5  14   7    5.70    5.80
   9  13  -6   -3.70    8.00
   8  13  -5   -1.70    6.30
  -7 -13   4    1.40    2.50
   7  13  -4    5.70    5.90
  -6 -13   3   74.59    6.60
   6  13  -3   67.39    9.80
  -5 -13   2   54.69    5.40
   5  13  -2   55.29    7.70
  -4 -13   1    8.20    2.80
   4  13  -1   11.80    4.20
   4  13  -1    9.80    3.00
  -3 -13   0   -0.50    1.80
   3  13   0    0.00    2.80
   3  13   0   -0.10    2.00
   2  13   1  211.38   11.30
   2  13   1  212.98   11.00
   1  13   2  284.37   13.70
   0  13   3  189.88   11.00
  -1  13   4  186.08   11.40
  -2  13   5   62.09    8.00
  -3  13   6    1.90    5.00
  -4  13   7    4.20    5.60
  10  12  -6   28.90   10.60
   9  12  -5   27.70    8.70
  -8 -12   4   60.29    6.20
   8  12  -4   58.69   10.80
  -7 -12   3  154.78    9.20
   7  12  -3  147.99   12.60
  -6 -12   2   30.50    4.30
   6  12  -2   29.50    6.40
  -5 -12   1   52.49    5.30
   5  12  -1   63.99    6.80
   5  12  -1   56.29    5.50
  -4 -12   0  159.28    8.50
   4  12   0  156.48    8.90
   4  12   0  152.98    9.30
  -3 -12  -1  419.36   17.30
   3  12   1  414.26   17.90
   3  12   1  427.76   18.10
   2  12   2   27.00    4.10
   2  12   2   29.00    3.70
   1  12   3  125.69    8.30
   1  12   3  120.89    7.90
   0  12   4   36.30    5.30
  -1  12   5   35.00    5.90
  -2  12   6   35.00    6.50
  -3  12   7    1.40    5.40
  -4  12   8   -2.30    5.60
  11  11  -6   -9.20    7.60
  10  11  -5   29.80    9.30
  -9 -11   4   48.50    5.70
   9  11  -4   47.80    9.50
  -8 -11   3   41.50    4.80
   8  11  -3   37.90    7.50
  -7 -11   2  373.76   16.20
   7  11  -2  360.36   17.40
   7  11  -2  345.87   19.10
  -6 -11   1  371.26   16.10
   6  11  -1  369.56   18.00
   6  11  -1  373.76   16.50
  -5 -11   0    0.70    2.10
   5  11   0   -0.50    1.90
   5  11   0   -3.40    2.80
  -4 -11  -1  173.38    8.70
   4  11   1  178.08    9.20
   4  11   1  167.18    9.00
  -3 -11  -2  677.03   25.80
   3  11   2  661.63   26.40
   3  11   2  682.63   26.60
  -2 -11  -3   32.30    3.20
   2  11   3   29.60    4.50
   2  11   3   33.90    3.90
   1  11   4   24.40    3.20
   1  11   4   19.70    4.10
   0  11   5    3.00    3.40
  -1  11   6   -2.90    3.80
  -2  11   7    2.50    5.20
  -3  11   8    2.20    5.70
  12  10  -6   10.20    9.40
  11  10  -5   79.89   13.00
 -10 -10   4   10.40    3.40
  10  10  -4   15.60    7.80
  -9 -10   3   45.00    5.20
   9  10  -3   35.60    8.40
  -8 -10   2   36.00    4.70
   8  10  -2   39.30    7.10
   8  10  -2   48.00    5.60
  -7 -10   1   -3.70    2.30
   7  10  -1    0.40    3.70
   7  10  -1    1.00    2.10
  -6 -10   0  233.48   11.10
   6  10   0  228.88   11.30
   6  10   0  254.27   12.30
  -5 -10  -1   18.10    2.70
   5  10   1   22.40    3.40
   5  10   1   17.20    2.70
  -4 -10  -2    7.50    1.90
   4  10   2    5.80    2.00
   4  10   2    3.30    2.40
  -3 -10  -3  170.48    7.80
   3  10   3  183.88    8.50
   3  10   3  162.58    9.30
  -2 -10  -4   64.49    3.70
   2  10   4   80.39    6.80
   2  10   4   82.89    5.00
   1  10   5   20.20    2.70
   1  10   5   26.00    5.10
   0  10   6   68.09    8.00
   0  10   6   51.49    3.80
  -1  10   7    0.30    5.00
  -2  10   8    1.90    5.60
  13   9  -6    2.70    8.60
  12   9  -5    1.50    6.80
 -11  -9   4   21.60    4.50
  11   9  -4   15.20    7.70
 -10  -9   3    6.70    2.70
  10   9  -3   13.90    6.00
  -9  -9   2  351.96   15.90
   9   9  -2  352.96   19.10
   9   9  -2  347.87   17.00
  -8  -9   1  153.18    8.70
   8   9  -1  148.59    8.60
   8   9  -1  143.39   10.10
  -7  -9   0   -0.10    1.80
   7   9   0   -0.90    2.80
   7   9   0    0.10    1.80
  -6  -9  -1  116.79    6.50
   6   9   1  105.39    6.50
   6   9   1  119.09    6.90
  -5  -9  -2   62.69    4.50
   5   9   2   65.89    4.70
   5   9   2   70.29    4.70
  -4  -9  -3   28.30    2.80
   4   9   3   35.10    4.10
   4   9   3   26.90    3.00
  -3  -9  -4   51.99    3.00
   3   9   4   54.99    4.00
   3   9   4   50.29    5.40
   2   9   5  116.89    8.20
   2   9   5  110.59    5.80
   1   9   6    1.50    4.10
   0   9   7   30.50    6.50
  -1   9   8   11.30    5.90
  -2   9   9    3.70    5.80
  14   8  -6   -3.20    7.80
  13   8  -5   -1.10    7.80
 -12  -8   4    7.00    3.60
  12   8  -4   11.50    7.40
 -11  -8   3    1.90    2.60
  11   8  -3    2.40    5.10
 -10  -8   2    3.00    2.70
  10   8  -2    0.10    4.80
  -9  -8   1  538.55   22.20
   9   8  -1  530.75   24.40
   9   8  -1  558.44   22.20
  -8  -8   0 1139.99   43.30
   8   8   0 1146.69   43.20
   8   8   0 1190.48   44.50
  -7  -8  -1  447.66   18.20
   7   8   1  451.35   18.50
   7   8   1  452.75   18.20
  -6  -8  -2  332.67   13.50
   6   8   2  317.17   13.40
   6   8   2  322.37   13.30
  -5  -8  -3  227.48    9.70
   5   8   3  234.78   10.40
   5   8   3  224.28   10.00
   4   8   4   19.80    3.60
   3   8   5   61.49    6.20
   3   8   5   55.69    3.60
   2   8   6  109.09    8.90
   1   8   7   41.70    7.10
   0   8   8    1.70    4.70
  -1   8   9    7.60    6.20
  15   7  -6   -6.80    8.30
  14   7  -5    6.70    7.60
 -13  -7   4   62.49    6.60
  13   7  -4   56.29   10.70
 -12  -7   3   30.50    4.60
  12   7  -3   37.10    7.80
 -11  -7   2  200.58   11.10
  11   7  -2  207.48   14.30
 -10  -7   1  588.94   23.20
  10   7  -1  518.35   24.90
  10   7  -1  567.54   22.80
  -9  -7   0    0.50    2.10
   9   7   0    2.30    1.90
  -8  -7  -1  510.25   20.30
   8   7   1  520.25   20.40
   8   7   1  486.35   20.00
  -7  -7  -2  260.57   11.40
   7   7   2  262.67   11.00
   7   7   2  263.07   11.30
  -6  -7  -3   25.70    2.80
   6   7   3   24.30    2.90
   6   7   3   27.40    2.80
   5   7   4   79.29    4.50
   5   7   4   84.49    6.00
   4   7   5   37.20    4.90
   4   7   5   38.20    2.90
   3   7   6   18.60    4.60
   2   7   7   27.80    6.20
   1   7   8   24.70    6.80
   0   7   9    0.80    5.70
  16   6  -6   11.90   10.50
  15   6  -5    0.90    7.90
 -14  -6   4    3.40    3.60
  14   6  -4    8.00    7.70
 -13  -6   3   11.30    3.80
  13   6  -3    1.70    6.10
 -12  -6   2   70.19    6.60
  12   6  -2   70.19    9.40
 -11  -6   1  196.08   10.60
  11   6  -1  193.88   10.00
  11   6  -1  191.38   12.50
 -10  -6   0  371.66   16.10
  10   6   0  371.66   15.70
  10   6   0  357.46   17.10
  -9  -6  -1  112.39    6.80
   9   6   1  106.19    6.30
   9   6   1  118.79    7.10
  -8  -6  -2   22.40    3.10
   8   6   2   30.50    3.10
   8   6   2   19.50    2.60
  -7  -6  -3  141.09    6.90
   7   6   3  135.69    6.60
   7   6   3  132.09    6.30
   6   6   4   -1.90    2.00
   6   6   4   -0.90    1.20
   5   6   5   14.40    1.70
   5   6   5   10.70    3.40
   4   6   6    3.90    3.50
   3   6   7    2.40    4.50
   2   6   8    1.20    5.00
   1   6   9    4.60    5.40
  17   5  -6   -2.00    7.80
  16   5  -5   -0.10    7.40
 -15  -5   4    1.20    3.30
  15   5  -4    4.50    7.30
 -14  -5   3   41.60    6.00
  14   5  -3   56.99   10.30
 -13  -5   2   79.19    7.50
  13   5  -2   75.49    9.70
 -12  -5   1   -0.20    2.60
  12   5  -1    1.20    4.00
  12   5  -1    2.20    1.90
 -11  -5   0   -3.40    2.00
  11   5   0   -1.40    1.70
  11   5   0   -6.40    3.00
 -10  -5  -1  106.39    7.00
  10   5   1  109.29    6.50
  10   5   1  106.09    6.90
  -9  -5  -2   85.29    5.80
   9   5   2   84.39    5.10
   9   5   2   80.99    5.30
  -8  -5  -3   67.79    4.90
   8   5   3   70.29    3.80
   8   5   3   64.99    4.50
   7   5   4  268.17   11.30
   7   5   4  272.07   11.10
   6   5   5   48.20    4.80
   6   5   5   50.19    3.10
   5   5   6    0.20    2.80
   4   5   7    3.30    4.50
   3   5   8   -1.20    4.50
   2   5   9    1.20    6.00
  17   4  -5    2.70    9.20
 -16  -4   4   16.40    4.60
  16   4  -4   21.60    9.30
 -15  -4   3   32.70    5.40
  15   4  -3   43.30    9.50
 -14  -4   2    2.40    3.10
  14   4  -2   12.70    6.10
 -13  -4   1   11.80    3.70
  13   4  -1    4.90    4.60
  13   4  -1    5.50    2.40
 -12  -4   0  259.67   12.80
  12   4   0  240.78   11.70
  12   4   0  231.18   13.10
 -11  -4  -1  287.47   13.60
  11   4   1  283.77   13.00
  11   4   1  290.47   13.20
 -10  -4  -2   11.90    2.70
  10   4   2    1.40    1.90
  10   4   2    1.00    1.80
   9   4   3   33.10    3.30
   9   4   3   30.20    2.50
   8   4   4   31.90    2.70
   8   4   4   37.90    3.40
   7   4   5  140.09    6.40
   7   4   5  142.19    7.50
   7   4   5  132.59    6.80
   6   4   6   65.99    6.10
   6   4   6   71.29    3.90
   6   4   6   70.29    3.50
   5   4   7    5.40    4.30
  18   3  -5   25.10   11.40
  17   3  -4   27.50   10.20
 -16  -3   3   18.20    4.90
  16   3  -3   21.60    8.40
 -15  -3   2  200.78   12.30
  15   3  -2  192.38   15.20
 -14  -3   1  145.29    9.80
  14   3  -1  132.39   11.20
  14   3  -1  150.48   10.30
 -13  -3   0   -3.90    2.60
  13   3   0   -2.30    3.30
  13   3   0   -3.00    1.90
 -12  -3  -1   78.89    7.20
  12   3   1   86.09    6.20
  12   3   1   88.29    6.30
  11   3   2  881.11   33.70
  10   3   3  630.54   24.60
   9   3   4   27.40    3.20
   9   3   4   24.10    3.20
   8   3   5    6.20    1.90
   8   3   5    2.70    1.90
   7   3   6    1.80    1.50
   7   3   6    0.80    1.30
  19   2  -5   27.10   12.10
  18   2  -4   -1.20    8.60
  17   2  -3   35.00    9.50
 -16  -2   2   -2.00    3.60
  16   2  -2   -3.20    5.40
 -15  -2   1    1.60    3.40
  15   2  -1    3.20    4.80
 -14  -2   0  141.39    9.90
  14   2   0  138.59    8.90
  14   2   0  140.09    9.80
  13   2   1    0.20    2.50
  13   2   1    1.40    2.10
  12   2   2  119.69    7.50
  11   2   3   22.00    3.40
  11   2   3   20.10    3.60
  10   2   4  137.89    7.70
  10   2   4  151.08    8.30
   9   2   5    3.60    2.10
   9   2   5    1.80    1.90
   8   2   6    2.30    1.80
  19   1  -4   36.30   11.60
  18   1  -3   37.90   10.20
  17   1  -2    6.70    6.80
  16   1  -1    4.10    5.20
  15   1   0    4.10    3.10
  14   1   1   68.59    7.00
  13   1   2    3.90    3.10
  12   1   3   71.09    6.70
  11   1   4   12.50    3.30
  10   1   5   17.20    3.30
   9   1   6    0.40    2.00
  20   0  -4    2.00   13.60
  19   0  -3   -3.80    7.80
  16   0   0  130.39   10.50
  15   0   1   69.99    7.60
  14   0   2  158.78   10.20
  13   0   3  207.88   11.90
  12   0   4   24.50    4.30
  11   0   5    2.90    2.60
  16  -1   1  131.39   10.90
  15  -1   2   80.59    8.20
  14  -1   3   31.00    5.40
  13  -1   4   46.70    5.60
  12  -1   5   47.80    5.70
  17  -2   1   81.39    9.30
  16  -2   2    2.90    3.60
  15  -2   3   14.00    4.50
  14  -2   4    5.80    3.60
  17  -3   2   27.50    5.80
  16  -3   3   -4.20    3.10
  18  -4   2   26.80    8.30
  -2  22  -2   -4.20    6.40
  -3  22  -1   -9.40    5.40
  -4  22   0   -0.70    4.90
  -5  22   1    1.40    4.70
   1  21  -4    3.90    7.20
   0  21  -3    9.70    7.80
  -1  21  -2   68.49   10.80
  -2  21  -1   14.50    6.50
  -3  21   0    2.70    4.60
  -4  21   1   11.90    5.20
  -5  21   2   20.30    5.90
  -6  21   3    4.20    4.50
   2  20  -4   -6.00    5.70
   1  20  -3    1.10    6.60
   0  20  -2    5.30    5.60
  -1  20  -1    8.90    5.70
  -2  20   0   13.00    5.30
  -3  20   1    5.00    4.70
  -4  20   2    5.30    4.50
  -5  20   3   12.50    5.00
  -6  20   4    5.50    5.40
   4  19  -5    2.30    8.40
   3  19  -4   17.90    8.00
   2  19  -3    7.60    6.80
   1  19  -2    0.20    4.70
   0  19  -1   -1.10    4.00
  -1  19   0   -3.30    3.90
  -2  19   1   18.80    5.10
  -3  19   2    3.40    3.60
  -4  19   3   23.80    5.60
  -5  19   4   -3.10    3.90
  -6  19   5    2.70    4.60
   5  18  -5    6.70    9.00
   4  18  -4    8.90    7.20
   3  18  -3   17.80    7.70
   2  18  -2    9.00    5.30
   1  18  -1   29.30    6.40
   0  18   0   22.60    5.30
  -1  18   1    8.70    4.40
  -2  18   2   69.59    7.70
  -3  18   3   15.00    5.20
  -4  18   4    7.10    4.40
  -5  18   5    0.30    4.80
   6  17  -5   -2.00    7.00
   5  17  -4    2.20    7.20
   4  17  -3   -1.00    5.20
   3  17  -2   28.60    7.40
   2  17  -1   57.39    7.90
   1  17   0   -4.90    3.40
   0  17   1   27.60    4.90
  -1  17   2   12.40    4.00
  -2  17   3   33.70    6.10
  -3  17   4   15.60    5.00
  -4  17   5    0.30    4.20
  -5  17   6    1.50    4.50
   8  16  -6   14.20   10.20
   7  16  -5    7.00    7.60
   6  16  -4   13.70    7.80
   5  16  -3   20.70    7.20
   4  16  -2   21.80    6.30
   3  16  -1   31.50    6.20
   2  16   0  112.29    8.70
   1  16   1  103.09    8.20
   0  16   2    3.50    3.60
  -1  16   3    2.60    3.80
  -2  16   4    2.70    4.00
  -3  16   5    7.00    5.10
  -4  16   6   -6.50    4.70
   9  15  -6    3.40    8.70
   8  15  -5   -9.10    5.70
   7  15  -4   -2.70    5.70
   6  15  -3    3.40    6.10
   5  15  -2   -0.80    4.90
   4  15  -1    9.40    4.80
   3  15   0   -0.40    2.80
   2  15   1   20.70    4.00
   1  15   2   72.79    6.70
   0  15   3    7.70    3.50
  -1  15   4   19.60    4.90
  -2  15   5   -2.10    4.60
  -3  15   6    6.00    5.50
  -4  15   7   -2.40    4.50
  10  14  -6    8.40    9.30
   9  14  -5    3.70    6.80
   8  14  -4    1.10    6.70
   7  14  -3   15.10    6.20
   6  14  -2   34.20    7.50
   5  14  -1   27.40    5.70
   4  14   0    2.40    3.40
   3  14   1   18.10    3.70
   2  14   2    0.50    2.50
   1  14   3   19.60    4.40
   0  14   4    2.50    3.20
  -1  14   5   28.50    6.20
  -2  14   6   34.90    7.00
  -3  14   7    0.10    5.60
  11  13  -6    1.00    7.30
  10  13  -5   16.60    8.30
  -9 -13   4    9.40    4.10
   9  13  -4   15.50    7.60
  -8 -13   3   90.49    7.40
   8  13  -3   87.39   11.40
  -7 -13   2  455.65   19.40
   7  13  -2  419.26   22.30
  -6 -13   1  195.38   11.70
   6  13  -1  179.08   12.50
   5  13   0    3.10    3.20
   4  13   1   10.50    3.20
   3  13   2  251.67   12.30
   2  13   3   62.69    5.70
   1  13   4   50.29    6.40
   0  13   5   42.90    6.30
  -1  13   6    1.40    4.00
  -2  13   7   22.20    6.40
  -3  13   8   -1.30    4.50
  12  12  -6    0.10    7.50
  11  12  -5   11.50    9.00
 -10 -12   4    2.40    2.80
  10  12  -4    1.60    6.00
  -9 -12   3    0.70    2.60
   9  12  -3   -2.70    5.60
  -8 -12   2    1.10    2.20
   8  12  -2    1.30    4.60
  -7 -12   1  357.66   15.80
   7  12  -1  333.77   17.70
   7  12  -1  361.56   16.20
  -6 -12   0  735.13   27.80
   6  12   0  679.53   28.10
   6  12   0  693.03   29.10
   5  12   1   52.69    5.50
   5  12   1   51.89    5.10
   4  12   2    4.40    2.30
   4  12   2    3.10    2.20
   3  12   3  130.89    8.20
   2  12   4   63.19    6.40
   1  12   5   31.70    5.50
   0  12   6   33.60    6.40
  -1  12   7    1.70    5.20
  -2  12   8    0.80    5.30
  13  11  -6   -0.60    9.00
  12  11  -5    6.20    8.80
 -11 -11   4  163.78   10.40
  11  11  -4  146.09   15.80
 -10 -11   3   95.59    7.60
  10  11  -3   94.59   12.10
  -9 -11   2   22.20    3.70
   9  11  -2   23.80    6.60
  -8 -11   1  262.37   12.80
   8  11  -1  272.37   15.30
   8  11  -1  265.77   13.10
  -7 -11   0   -1.50    1.90
   7  11   0   -0.90    2.70
   7  11   0   -0.20    2.00
  -6 -11  -1  388.16   16.20
   6  11   1  373.96   16.60
   6  11   1  382.46   16.50
  -5 -11  -2   40.40    5.10
   5  11   2   49.99    4.40
   5  11   2   39.60    4.20
   4  11   3   90.49    6.40
   4  11   3   91.39    6.00
   3  11   4    5.20    2.80
   3  11   4    5.90    2.30
   2  11   5   43.60    5.90
   1  11   6    7.00    4.50
   0  11   7    2.90    4.80
  -1  11   8   -0.80    5.10
  14  10  -6    6.50    9.30
  13  10  -5   16.20    8.40
 -12 -10   4   16.30    4.20
  12  10  -4   13.20    8.30
 -11 -10   3   43.50    5.30
  11  10  -3   60.69   10.30
 -10 -10   2   68.59    6.10
  10  10  -2   60.59    8.80
  -9 -10   1   11.30    3.00
   9  10  -1   14.70    5.10
   9  10  -1   14.70    3.40
  -8 -10   0    3.30    2.50
   8  10   0    3.60    3.20
   8  10   0    3.10    2.60
  -7 -10  -1   -3.40    1.80
   7  10   1    0.00    2.80
   7  10   1   -1.50    2.10
  -6 -10  -2  225.98   10.50
   6  10   2  233.58   10.80
   6  10   2  223.68   10.50
  -5 -10  -3  210.58    9.50
   5  10   3  199.78    9.70
   5  10   3  218.18   10.20
  -4 -10  -4    1.40    0.80
   4  10   4    6.70    2.00
   4  10   4    2.90    2.90
   3  10   5   -5.00    2.80
   3  10   5   -0.70    1.50
   2  10   6   38.40    6.20
   2  10   6   35.80    3.20
   1  10   7   12.20    5.40
   0  10   8   -2.80    4.70
  15   9  -6   -4.60    8.40
  14   9  -5    3.40    7.80
 -13  -9   4   -1.60    2.90
  13   9  -4   -1.70    7.00
 -12  -9   3   22.50    4.30
  12   9  -3   23.00    7.90
 -11  -9   2   16.80    3.30
  11   9  -2   10.20    4.90
 -10  -9   1  238.08   11.90
  10   9  -1  244.38   11.90
  10   9  -1  223.18   13.60
  -9  -9   0    3.50    2.20
   9   9   0    1.60    2.20
  -8  -9  -1  159.68    9.20
   8   9   1  166.68    9.10
   8   9   1  210.38   10.10
  -7  -9  -2   93.29    5.90
   7   9   2   77.89    5.60
   7   9   2   85.79    5.50
  -6  -9  -3  105.69    6.00
   6   9   3  107.39    6.20
   6   9   3  112.89    6.30
  -5  -9  -4  225.38   10.40
   5   9   4  285.27   11.30
   5   9   4  289.77   12.50
   4   9   5   33.90    5.00
   4   9   5   31.80    3.00
   3   9   6    3.70    3.70
   2   9   7   14.50    5.40
   1   9   8    3.50    5.40
   0   9   9    6.10    6.00
  16   8  -6   11.70   10.20
  15   8  -5   -4.60    8.00
 -14  -8   4    7.90    3.60
  14   8  -4    8.20    7.70
 -13  -8   3   48.10    6.20
  13   8  -3   27.50    8.40
 -12  -8   2   16.90    3.70
  12   8  -2   16.70    5.70
 -11  -8   1  191.28   10.40
  11   8  -1  183.18   12.50
  11   8  -1  177.48    9.90
 -10  -8   0 1289.27   49.90
  10   8   0 1401.36   51.39
  10   8   0 1303.27   49.60
  -9  -8  -1  570.34   22.80
   9   8   1  554.74   22.50
   9   8   1  560.84   23.20
  -8  -8  -2   28.20    3.60
   8   8   2   23.60    3.10
   8   8   2   30.10    3.70
  -7  -8  -3   10.40    2.30
   7   8   3   13.50    2.40
   7   8   3   10.90    2.40
  -6  -8  -4    1.00    1.10
   6   8   4    2.20    2.10
   6   8   4    1.70    1.50
   5   8   5   39.60    5.00
   5   8   5   40.00    3.20
   4   8   6    9.80    4.00
   3   8   7    1.80    4.00
   2   8   8   -0.80    4.80
   1   8   9    4.20    5.40
  16   7  -5   14.20    9.70
 -15  -7   4   -2.30    3.20
  15   7  -4   -6.10    6.70
 -14  -7   3   -2.20    2.90
  14   7  -3   -6.50    5.30
 -13  -7   2    6.60    3.20
  13   7  -2    8.60    6.00
 -12  -7   1    3.10    2.70
  12   7  -1    4.20    2.50
  12   7  -1    6.50    4.60
 -11  -7   0    2.90    2.50
  11   7   0   -3.30    3.10
  11   7   0   -1.30    1.80
 -10  -7  -1  541.65   22.30
  10   7   1  551.54   22.70
  10   7   1  540.95   21.90
  -9  -7  -2  919.81   34.40
   9   7   2  890.01   33.90
   9   7   2  888.01   33.80
  -8  -7  -3  371.26   15.30
   8   7   3  359.06   14.60
   8   7   3  371.66   15.00
   7   7   4   24.20    3.10
   7   7   4   24.10    2.80
   6   7   5    1.10    1.30
   6   7   5   -1.00    2.20
   5   7   6    0.90    3.00
   4   7   7   -3.90    3.80
   3   7   8    1.20    4.70
  17   6  -5   11.30    9.60
  16   6  -4    6.60    8.60
 -15  -6   3    3.00    3.20
  15   6  -3    3.90    6.70
 -14  -6   2    3.00    3.30
  14   6  -2   10.60    6.30
 -13  -6   1   30.80    4.80
  13   6  -1   23.60    6.30
  13   6  -1   29.90    4.00
 -12  -6   0   14.90    3.60
  12   6   0   27.50    3.80
  12   6   0   26.40    5.40
 -11  -6  -1  198.48   10.40
  11   6   1  181.88   10.40
  11   6   1  187.88    9.60
 -10  -6  -2   74.59    6.00
  10   6   2   80.79    5.60
  10   6   2   69.09    5.30
  -9  -6  -3   68.59    5.40
   9   6   3   77.69    4.50
   9   6   3   68.39    4.80
   8   6   4  146.09    6.90
   8   6   4  149.59    7.10
   7   6   5    8.90    1.70
   7   6   5    8.00    2.60
   6   6   6   36.30    4.90
   5   6   7    5.60    4.10
  18   5  -5   24.00   10.80
  17   5  -4    0.30    8.00
  16   5  -3   11.70    7.30
 -15  -5   2  104.89    9.60
  15   5  -2  102.29   11.80
 -14  -5   1   85.69    7.80
  14   5  -1   79.69    9.30
 -13  -5   0    1.10    2.60
  13   5   0    3.70    2.30
  13   5   0    0.30    3.70
 -12  -5  -1    1.80    2.70
  12   5   1    3.00    3.00
  12   5   1    4.20    2.20
 -11  -5  -2   -2.60    2.50
  11   5   2   -1.80    2.20
  11   5   2   -0.80    1.80
  10   5   3   -0.20    1.60
  10   5   3   -0.20    1.70
   9   5   4   21.50    2.30
   9   5   4   18.20    2.70
   8   5   5   41.40    3.40
   7   5   6    0.10    1.10
   7   5   6   -1.00    1.30
  19   4  -5    3.60    9.10
  18   4  -4    8.10    9.30
  17   4  -3   -1.50    6.80
  16   4  -2   -0.20    5.80
  15   4  -1  155.48   12.60
  14   4   0  319.47   16.60
  13   4   1    2.80    3.30
  11   4   3   69.89    7.20
   9   4   5   59.99    4.80
   8   4   6   60.79    4.50
  19   3  -4   26.90   11.90
  18   3  -3   11.20    8.60
  17   3  -2    9.20    6.70
  16   3  -1   57.99    8.70
  15   3   0   -1.10    5.60
  11   3   4   -1.00    2.00
  10   3   5   17.00    3.30
   9   3   6    0.60    1.90
  19   2  -3   20.00   13.40
  13   2   3   81.29    7.00
  12   2   4    0.10    2.30
  11   2   5   15.80    3.40
  16   1   1    4.80    3.50
  15   1   2   -0.20    2.80
  14   1   3   78.69    7.50
  13   1   4  189.98   11.30
  12   1   5   22.80    4.30
  17   0   1   43.90    7.10
  16   0   2    3.30    4.00
  15   0   3   13.80    4.60
  14   0   4    1.80    2.80
  17  -1   2  180.08   13.10
  16  -1   3   57.19    7.50
  18  -2   2    9.20    4.40
   0  22  -2    4.20    7.40
  -1  22  -1   26.60    7.80
  -2  22   0   23.00    6.90
  -3  22   1    3.80    5.50
  -4  22   2    5.00    5.30
   2  21  -3    1.90    6.30
   1  21  -2   15.80    6.90
   0  21  -1   32.70    8.10
  -1  21   0   -2.50    4.80
  -2  21   1   19.40    6.00
  -3  21   2    4.40    4.70
  -4  21   3    3.40    4.90
   4  20  -4   -0.10    6.30
   3  20  -3   10.50    7.20
   2  20  -2    0.50    6.20
   1  20  -1    8.50    5.30
   0  20   0   26.30    6.60
  -1  20   1    5.70    4.90
  -2  20   2    8.40    4.40
  -3  20   3    6.80    4.60
  -4  20   4   14.30    5.20
   5  19  -4    6.40    7.90
   4  19  -3   12.50    7.30
   3  19  -2    1.40    6.20
   2  19  -1   36.10    7.40
   1  19   0   -0.10    4.40
   0  19   1    2.50    3.70
  -1  19   2    5.40    4.30
  -2  19   3   19.50    5.10
  -3  19   4   35.40    6.60
  -4  19   5    0.00    4.90
   7  18  -5    0.40    7.60
   6  18  -4    6.20    7.20
   5  18  -3    3.00    5.90
   4  18  -2   11.70    6.00
   3  18  -1    6.10    5.30
   2  18   0  108.39    9.50
   1  18   1   29.30    5.40
   0  18   2   21.30    5.10
  -1  18   3   25.60    5.50
  -2  18   4    3.00    4.70
  -3  18   5   31.10    7.00
   8  17  -5    3.00    7.70
   7  17  -4   -1.50    6.10
   6  17  -3   20.60    7.30
   5  17  -2   67.79   10.00
   4  17  -1   -2.50    3.90
   3  17   0   -3.60    3.90
   2  17   1   66.39    7.10
   1  17   2  154.88   10.40
   0  17   3   74.59    7.50
  -1  17   4   33.20    6.40
  -2  17   5    7.20    5.30
  -3  17   6    0.80    4.50
   9  16  -5   14.40    9.50
   8  16  -4    9.60    8.20
   7  16  -3    7.70    6.90
   6  16  -2   -3.90    4.70
   5  16  -1   12.00    5.60
   4  16   0   -2.10    3.70
   3  16   1   43.20    6.20
   2  16   2    6.20    3.60
   1  16   3   54.99    6.30
   0  16   4   42.20    6.50
  -1  16   5    3.90    4.30
  -2  16   6    8.20    5.00
  -3  16   7   -3.30    4.60
  10  15  -5   -9.90    7.40
   9  15  -4   19.80    8.40
   8  15  -3    6.60    5.90
   7  15  -2   -2.10    5.00
   6  15  -1    4.50    4.40
   5  15   0   -0.30    3.50
   4  15   1    7.90    3.40
   3  15   2   13.00    3.50
   2  15   3   15.80    3.90
   1  15   4    6.00    4.00
   0  15   5   20.00    5.10
  -1  15   6    6.30    4.80
  -2  15   7    4.70    5.60
  11  14  -5   12.00    8.90
  10  14  -4    4.40    7.70
   9  14  -3   13.00    6.50
   8  14  -2    6.30    5.30
   7  14  -1  143.99   11.70
   6  14   0   96.79    8.80
   5  14   1   20.50    4.40
   4  14   2   29.50    4.30
   3  14   3   30.70    4.80
   2  14   4   -1.40    3.30
   1  14   5    5.20    3.90
   0  14   6   39.10    7.30
  -1  14   7   11.00    5.70
  12  13  -5   22.40   10.10
  11  13  -4   23.90    9.30
  10  13  -3   13.70    7.00
   9  13  -2   55.89    9.10
   8  13  -1  179.48   13.00
   7  13   0    6.80    4.20
   6  13   1  198.88   11.30
   5  13   2   56.99    5.20
   4  13   3    0.50    2.60
   3  13   4   17.40    4.20
   2  13   5   13.40    4.60
   1  13   6    3.20    4.60
   0  13   7   12.10    5.60
  -1  13   8    4.00    5.20
  13  12  -5   -0.50    8.30
  12  12  -4   -1.80    7.40
  11  12  -3   82.59   12.20
  10  12  -2  122.59   12.10
   9  12  -1  101.29   10.00
   8  12   0  622.84   27.10
   7  12   1  350.56   16.40
   6  12   2   36.20    4.50
   5  12   3   29.70    4.10
   4  12   4    5.40    2.80
   3  12   5    1.10    3.40
   2  12   6   -0.90    4.00
   1  12   7   -2.40    4.70
   0  12   8   -4.10    4.70
  14  11  -5   -2.60    8.00
  13  11  -4   -6.70    7.10
  12  11  -3   57.49   10.10
  11  11  -2    1.30    5.30
  10  11  -1    4.10    4.00
   9  11   0   -2.60    3.30
   8  11   1  337.47   15.80
   7  11   2  356.26   15.60
   6  11   3    3.40    2.30
   5  11   4   81.49    6.30
   4  11   5    7.10    3.60
   3  11   6    7.40    4.20
   2  11   7   -1.30    4.30
   1  11   8   -2.30    4.70
  15  10  -5    0.80    8.70
  14  10  -4   19.20    8.50
  13  10  -3   21.30    8.20
  12  10  -2   28.60    7.70
  11  10  -1    8.20    4.90
  10  10   0   48.70    6.70
   9  10   1   16.60    4.00
   8  10   2   35.70    4.40
   7  10   3  245.98   11.30
   6  10   4   22.10    3.60
   5  10   5   87.09    6.80
   4  10   6   58.49    6.90
   3  10   7    2.90    4.30
   2  10   8    1.10    4.70
  16   9  -5    7.90    9.70
  15   9  -4   -7.60    5.70
  14   9  -3   19.30    8.00
  13   9  -2  117.59   12.20
  12   9  -1   16.60    5.40
  11   9   0    0.50    3.30
  10   9   1  240.78   12.50
   9   9   2  341.57   15.00
   8   9   3  126.89    6.80
   7   9   4  243.58   11.10
   6   9   5   90.49    6.50
   5   9   6    1.30    1.40
   5   9   6   -1.30    3.10
   4   9   7   14.90    4.90
   3   9   8   -3.10    4.30
  17   8  -5    6.90    9.70
  16   8  -4   -3.30    7.60
  15   8  -3    2.00    6.60
  14   8  -2   -2.00    5.30
  13   8  -1   28.00    6.40
  12   8   0   11.20    4.20
  11   8   1  176.78   10.40
  10   8   2    1.70    2.60
   9   8   3  116.79    6.40
   8   8   4  100.49    5.70
   7   8   5   81.09    5.90
   6   8   6   39.50    3.20
   6   8   6   40.40    5.30
   5   8   7   11.10    4.30
  18   7  -5    6.70    9.90
  17   7  -4   31.00   11.10
  16   7  -3    4.20    7.00
  15   7  -2   15.40    6.90
  14   7  -1   29.20    6.90
  13   7   0    1.50    3.70
  12   7   1   -1.10    3.00
  11   7   2  223.98   11.10
  10   7   3  223.88   10.00
   9   7   4    0.50    1.60
   8   7   5   18.40    3.10
   7   7   6    7.30    1.90
   7   7   6    5.80    1.70
  18   6  -4   11.50    9.30
  17   6  -3   12.80    8.40
  16   6  -2    4.30    5.90
  15   6  -1   16.50    6.20
  14   6   0   50.59    7.10
  13   6   1   28.60    4.90
  12   6   2   61.79    7.90
   8   6   6    9.60    2.20
  19   5  -4    9.10    9.80
  18   5  -3   29.30    9.90
  17   5  -2   -1.90    5.50
  16   5  -1   38.30    7.50
  15   5   0   -2.20    4.40
  10   5   5    2.50    2.20
  11   4   5    3.30    2.40
  14   3   3   16.20    3.90
  13   3   4   28.50    4.40
  17   2   1    4.50    3.60
  16   2   2   -5.10    2.70
  15   2   3   39.30    5.60
  14   2   4    1.80    3.10
  18   1   1    5.80    4.20
  17   1   2   23.00    5.20
  16   1   3    6.90    4.10
  18   0   2   23.20    6.20
  -1  23   0    4.40    6.10
   2  22  -2   -1.80    6.80
   1  22  -1   10.40    7.30
   0  22   0   52.39    8.80
  -1  22   1   26.70    7.40
  -2  22   2    5.80    4.80
   4  21  -3  -10.70    6.50
   3  21  -2    7.10    6.60
   2  21  -1   -3.30    5.30
   1  21   0    1.50    4.80
   0  21   1   47.80    8.40
  -1  21   2   54.19    8.30
  -2  21   3   -0.20    4.70
   6  20  -4    0.60    8.20
   5  20  -3    1.50    6.20
   4  20  -2   15.60    6.70
   3  20  -1   -2.30    5.40
   2  20   0    3.60    5.00
   1  20   1    6.10    5.20
   0  20   2    3.00    4.70
  -1  20   3   30.90    6.30
  -2  20   4    8.10    5.60
   7  19  -4   -4.60    6.20
   6  19  -3   -1.50    6.00
   5  19  -2    9.50    6.80
   4  19  -1    4.40    5.70
   3  19   0   -0.80    4.00
   2  19   1   27.00    5.90
   1  19   2   -3.00    3.40
   0  19   3   -1.60    4.00
  -1  19   4   31.90    6.80
  -2  19   5   11.00    5.30
   8  18  -4   -0.10    6.60
   7  18  -3   16.50    8.30
   6  18  -2   -2.70    6.00
   5  18  -1   32.60    7.70
   4  18   0    2.10    4.40
   3  18   1    9.70    4.60
   2  18   2   10.50    4.40
   1  18   3    5.70    3.90
   0  18   4    0.10    4.40
  -1  18   5   17.40    5.90
  -2  18   6   25.10    7.00
  10  17  -5   10.70    9.20
   9  17  -4   12.30    8.80
   8  17  -3   26.00    8.60
   7  17  -2   92.19   12.10
   6  17  -1   54.69    8.40
   5  17   0    0.30    4.30
   3  17   2   37.30    5.60
   2  17   3   13.40    4.50
   1  17   4    1.30    4.20
   0  17   5    4.20    4.80
  -1  17   6    1.00    4.50
  11  16  -5   13.40    9.90
  10  16  -4    6.90    8.30
   9  16  -3    5.20    6.60
   8  16  -2   28.30    8.10
   7  16  -1   22.10    6.40
   6  16   0   40.80    6.90
   5  16   1    8.90    4.40
   4  16   2   20.00    4.70
   3  16   3    3.90    3.10
   2  16   4   24.30    5.30
   1  16   5   13.30    4.80
   0  16   6   -0.60    4.60
  -1  16   7    3.30    4.60
  12  15  -5   -2.00    7.40
  11  15  -4   -0.40    6.40
  10  15  -3   23.70    8.90
   9  15  -2    0.90    5.90
   8  15  -1    2.40    5.00
   7  15   0   -0.90    3.60
   6  15   1    5.90    4.00
   5  15   2   -0.70    2.70
   4  15   3   59.99    5.90
   3  15   4   16.50    4.60
   2  15   5   -0.60    3.90
   1  15   6    5.40    4.80
   0  15   7    2.30    5.30
  13  14  -5   -7.50    7.50
  12  14  -4   24.50    9.90
  11  14  -3   30.80    9.70
  10  14  -2   -0.30    4.60
   9  14  -1   12.90    5.60
   8  14   0  111.09    9.40
   7  14   1  170.28   10.90
   6  14   2   31.10    5.20
   5  14   3    7.30    3.00
   4  14   4   -1.90    3.00
   3  14   5   11.70    4.40
   2  14   6    6.20    4.90
   1  14   7    5.70    5.10
  14  13  -5   -0.20    8.60
  13  13  -4   -0.30    8.00
  12  13  -3    2.40    7.30
  11  13  -2   55.39    9.90
  10  13  -1    0.50    4.90
   9  13   0   -0.80    3.90
   8  13   1  157.58   10.40
   7  13   2  469.05   20.40
   6  13   3   65.69    5.80
   5  13   4   22.20    4.30
   4  13   5   16.80    4.60
   3  13   6   -0.90    3.80
   2  13   7    4.00    4.90
   1  13   8    5.00    5.10
  15  12  -5    7.60    9.90
  14  12  -4   -5.20    7.00
  13  12  -3   -1.90    6.40
  12  12  -2   44.20    9.10
  11  12  -1   11.90    5.60
  10  12   0   14.40    5.00
   9  12   1   88.99    7.80
   8  12   2    8.10    3.20
   7  12   3  148.49    8.50
   6  12   4   25.10    4.10
   5  12   5    1.10    3.20
   4  12   6   -1.60    3.50
   3  12   7    1.00    4.30
   2  12   8   -3.10    4.40
  16  11  -5    2.60    9.40
  15  11  -4   30.40   10.10
  14  11  -3    3.40    7.10
  13  11  -2   23.10    7.40
  12  11  -1    4.80    5.20
  10  11   1    1.30    3.40
   9  11   2   22.50    4.20
   8  11   3   38.30    4.40
   7  11   4   47.10    5.10
   6  11   5   46.50    5.50
   5  11   6    0.20    3.40
   4  11   7    1.50    4.20
   3  11   8    3.40    4.90
  17  10  -5    5.00    9.80
  16  10  -4   -1.40    7.90
  15  10  -3   21.20    8.90
  14  10  -2   -5.30    5.20
  13  10  -1   70.29    9.40
  12  10   0   11.10    4.70
  11  10   1    3.60    3.50
  10  10   2   70.09    6.20
   9  10   3   41.20    4.30
   8  10   4   -0.20    2.10
   7  10   5   45.90    5.20
   6  10   6  100.19    7.70
   5  10   7   18.10    5.10
  17   9  -4   -0.80    8.00
  16   9  -3    4.90    7.70
  15   9  -2   67.89   10.70
  14   9  -1  136.59   12.10
  13   9   0   -4.60    3.40
  12   9   1   22.60    4.60
  11   9   2    9.20    3.10
  10   9   3   14.70    3.10
   9   9   4    3.20    2.00
   8   9   5   -1.50    2.20
  18   8  -4    6.20    9.30
  17   8  -3   15.20    8.80
  16   8  -2   -5.70    5.30
  15   8  -1   42.60    8.10
  14   8   0  240.48   14.60
  13   8   1   23.20    4.90
  12   8   2   20.60    4.00
  19   7  -4    6.00    9.20
  18   7  -3   19.60    9.30
  17   7  -2   -3.40    6.00
  16   7  -1   -0.50    5.10
  15   7   0   -2.70    4.20
  18   3   1   13.40    4.80
  17   3   2    5.30    3.80
  16   3   3    8.10    4.90
  18   2   2   62.79    8.40
   1  23   0   -1.90    6.20
   0  23   1    7.70    6.70
   4  22  -2   -9.90    6.10
   3  22  -1   -0.20    6.60
   2  22   0   -1.60    5.60
   1  22   1    7.60    5.80
   0  22   2   -1.70    4.50
  -1  22   3   20.80    6.40
   6  21  -3    3.10    7.80
   5  21  -2    7.80    7.50
   4  21  -1    8.90    6.30
   3  21   0    1.60    5.60
   2  21   1   -3.50    4.60
   1  21   2   26.60    7.00
   0  21   3    1.60    5.30
  -1  21   4    6.00    5.20
   7  20  -3   10.00    8.40
   6  20  -2    6.60    6.70
   5  20  -1    4.80    6.00
   4  20   0    1.60    4.90
   3  20   1   -1.50    5.00
   2  20   2    7.60    5.20
   1  20   3   -0.10    4.40
   0  20   4   10.60    5.10
   9  19  -4    2.70    7.60
   8  19  -3   -3.90    6.30
   7  19  -2   25.70    8.20
   6  19  -1   27.40    8.30
   5  19   0   -0.10    4.60
   4  19   1    2.60    4.50
   3  19   2    2.50    4.60
   2  19   3    7.60    4.30
   1  19   4   -2.10    4.00
   0  19   5    9.60    5.40
  10  18  -4   13.60    8.90
   9  18  -3    7.10    7.80
   8  18  -2    5.30    6.40
   7  18  -1   56.29    9.30
   6  18   0  116.79   10.80
   5  18   1   29.00    6.00
   4  18   2   10.60    4.50
   3  18   3   17.80    4.70
   2  18   4   -0.50    3.50
   1  18   5    0.70    4.50
   0  18   6    8.20    5.50
  11  17  -4    8.40    8.20
  10  17  -3    5.20    7.80
   9  17  -2    7.50    7.00
   8  17  -1   21.00    7.60
   7  17   0    1.70    5.00
   6  17   1   49.60    7.00
   5  17   2   50.89    7.00
   4  17   3    1.60    3.60
   3  17   4   -2.50    3.50
   2  17   5    2.20    3.80
   1  17   6   -0.50    4.60
  12  16  -4   -7.60    7.50
  11  16  -3   -0.60    6.40
  10  16  -2   30.60    8.70
   9  16  -1   22.40    7.10
   8  16   0   20.70    6.40
   7  16   1   15.70    5.00
   6  16   2   -0.50    3.60
   5  16   3   23.80    5.00
   4  16   4    0.00    3.60
   3  16   5    5.00    4.30
   2  16   6    0.60    4.60
   1  16   7    2.40    4.90
  13  15  -4   -8.70    7.50
  12  15  -3   22.70    9.10
  11  15  -2   57.49   10.40
  10  15  -1    3.60    4.80
   9  15   0   -2.10    4.20
   8  15   1    2.90    4.00
   7  15   2    3.50    3.80
   6  15   3   10.10    3.70
   5  15   4   26.70    5.00
   4  15   5   12.90    4.60
   3  15   6   -0.30    4.10
   2  15   7   -0.20    4.50
  14  14  -4    9.40    8.80
  13  14  -3   14.50    8.50
  12  14  -2   -0.70    5.60
  11  14  -1   47.80    8.70
  10  14   0    9.60    5.20
   9  14   1   11.40    4.70
   8  14   2   -1.20    3.40
   7  14   3   15.50    4.00
   6  14   4   14.60    4.00
   5  14   5   26.50    5.20
   4  14   6   35.40    6.10
   3  14   7   -0.70    4.20
  15  13  -4   17.90    9.80
  14  13  -3    4.50    7.70
  13  13  -2   14.90    7.80
  12  13  -1   57.39    9.20
  11  13   0   -3.30    4.00
  10  13   1    5.30    4.30
   9  13   2   63.69    6.80
   8  13   3   92.59    7.10
   7  13   4    1.00    2.90
   6  13   5   -0.10    3.30
   5  13   6    3.10    3.90
   4  13   7    8.60    4.80
   3  13   8   -3.80    5.10
  16  12  -4  -14.20    7.60
  15  12  -3   17.40    8.90
  14  12  -2    1.40    6.40
  13  12  -1    1.40    5.50
  12  12   0   19.80    5.90
  11  12   1    8.10    4.30
  10  12   2  124.99    9.00
   9  12   3    0.80    3.00
   8  12   4   43.10    5.00
   7  12   5    6.40    3.40
   6  12   6    2.40    3.30
   5  12   7    2.50    5.20
  17  11  -4   11.90    9.70
  16  11  -3   14.30    8.40
  15  11  -2   19.10    8.00
  14  11  -1   30.90    7.70
  13  11   0   -2.00    4.10
  12  11   1   13.20    4.60
  11  11   2   -0.70    3.20
  10  11   3   91.59    6.90
   9  11   4   52.79    5.00
   8  11   5    0.60    2.60
  18  10  -4    9.80   10.30
  17  10  -3   -5.40    6.90
  16  10  -2    5.30    6.60
  15  10  -1   33.40    7.70
  14  10   0  232.98   15.10
  13  10   1   80.99    8.30
  12  10   2   21.40    4.60
  11  10   3   49.40    7.40
  18   9  -3    2.30    8.30
  17   9  -2    7.40    7.30
  16   9  -1    8.90    6.30
  15   9   0   -2.30    4.30
   5  22  -1   10.70    6.80
   4  22   0   37.80    9.00
   3  22   1   -3.10    5.60
   2  22   2   -3.40    5.50
   1  22   3    4.30    5.40
   7  21  -2    2.60    7.90
   6  21  -1    6.10    7.00
   5  21   0    0.00    5.20
   4  21   1   12.40    6.60
   3  21   2    6.20    5.90
   2  21   3    3.90    5.10
   1  21   4    3.60    5.30
   9  20  -3   -0.10    7.00
   8  20  -2    2.50    7.70
   7  20  -1   -3.80    5.70
   6  20   0    9.00    6.50
   5  20   1   -5.00    4.80
   4  20   2   10.10    5.40
   3  20   3   18.60    5.80
   2  20   4   -0.80    4.60
  10  19  -3    2.20    7.80
   9  19  -2   -2.60    6.90
   8  19  -1    7.60    7.20
   7  19   0   -4.00    5.60
   6  19   1   42.20    7.80
   5  19   2   13.00    6.00
   4  19   3   20.50    5.90
   3  19   4   29.80    6.40
   2  19   5   -4.60    4.30
  11  18  -3   18.00    8.70
  10  18  -2    2.50    6.20
   9  18  -1   -3.70    6.20
   8  18   0   58.49    9.20
   7  18   1   58.19    8.30
   6  18   2    6.50    4.90
   5  18   3    6.40    4.60
   4  18   4    3.50    4.40
   3  18   5    3.60    4.60
   2  18   6    0.20    4.60
  12  17  -3   -0.60    7.90
  11  17  -2   -6.10    6.20
  10  17  -1    0.30    5.80
   9  17   0   -4.80    4.90
   8  17   1   15.70    5.50
   7  17   2   95.59    9.30
   6  17   3   27.30    5.80
   5  17   4   -1.00    3.60
   4  17   5    6.90    4.40
   3  17   6    0.90    4.40
  13  16  -3   -6.00    7.50
  12  16  -2   -0.60    6.50
  11  16  -1   30.90    8.00
  10  16   0   28.70    7.30
   9  16   1   20.30    5.90
   8  16   2   20.50    5.30
   7  16   3    9.90    4.40
   6  16   4   12.70    4.40
   5  16   5    1.40    3.80
   4  16   6    7.60    4.70
   3  16   7    0.20    4.50
  14  15  -3    9.10    8.70
  13  15  -2   32.80    9.40
  12  15  -1   27.70    7.50
  11  15   0   -3.90    4.60
  10  15   1    2.80    4.60
   9  15   2    2.40    3.90
   8  15   3   10.70    4.30
   7  15   4    1.30    3.40
   6  15   5   -0.40    3.30
   5  15   6   -2.20    3.60
   4  15   7    3.20    4.80
  15  14  -3   11.60    8.40
  14  14  -2   -2.00    6.50
  13  14  -1   47.10    9.20
  12  14   0   97.39   10.80
  11  14   1   28.30    6.30
  10  14   2   -0.40    3.80
   9  14   3   10.70    4.20
   8  14   4   13.60    4.00
   7  14   5    1.30    3.20
   6  14   6    4.00    4.00
  16  13  -3   -2.80    7.70
  15  13  -2   -0.80    6.40
  14  13  -1   -2.20    5.50
  13  13   0   -2.00    4.70
  12  13   1   58.99    8.30
  11  13   2   42.40    6.40
  10  13   3   15.90    4.30
   9  13   4    7.50    3.40
   8  13   5   -1.40    3.00
  17  12  -3    3.90    8.60
  16  12  -2   17.10    8.20
  15  12  -1    3.40    6.10
  14  12   0    2.50    5.30
  13  12   1   -2.30    4.20
  12  12   2   41.90    6.40
  11  12   3   69.19    9.10
  18  11  -3   38.70   11.40
  17  11  -2    8.20    7.80
  16  11  -1   15.70    6.90
  15  11   0   -4.20    4.60
   6  22   0    9.20    6.80
   5  22   1   17.30    7.30
   4  22   2   -1.90    6.00
   8  21  -1    6.80    7.50
   7  21   0    4.30    6.90
   6  21   1    7.70    6.40
   5  21   2   16.90    6.90
   4  21   3   -7.40    4.80
  10  20  -2   -0.50    7.20
   9  20  -1    9.20    6.90
   8  20   0    6.00    6.60
   7  20   1    0.70    5.00
   6  20   2    4.10    4.90
   5  20   3   -0.70    5.10
   4  20   4   -2.10    4.30
  11  19  -2   26.80    9.60
  10  19  -1   14.80    7.70
   9  19   0   -1.20    6.10
   8  19   1   13.60    6.60
   7  19   2   27.70    7.00
   6  19   3    1.80    4.70
   5  19   4    1.80    4.50
   4  19   5    4.70    4.40
  12  18  -2    3.70    7.20
  11  18  -1   13.50    7.90
  10  18   0   -0.20    6.20
   9  18   1    2.40    5.80
   8  18   2    4.10    5.20
   7  18   3   13.80    5.40
   6  18   4    9.80    4.70
   5  18   5    3.90    4.60
  13  17  -2    9.30    8.00
  12  17  -1    2.20    6.00
  11  17   0    7.30    6.50
  10  17   1   -1.30    5.20
   9  17   2   -0.50    4.60
   8  17   3   25.10    6.10
   7  17   4    6.40    4.20
   6  17   5    5.30    4.20
   5  17   6    0.30    4.30
  15  16  -3    3.70    8.50
  14  16  -2    2.10    7.30
  13  16  -1    1.10    6.00
  12  16   0   23.90    7.40
  11  16   1   24.00    6.90
  10  16   2   30.10    6.60
   9  16   3    6.40    4.60
   8  16   4   11.10    4.50
   7  16   5   -0.20    3.60
   6  16   6   -0.70    4.30
  16  15  -3    5.20    9.10
  15  15  -2    1.80    7.70
  14  15  -1   12.70    7.40
  13  15   0   -6.60    5.20
  12  15   1   24.60    6.60
  11  15   2   66.29    8.50
  10  15   3   44.60    6.70
   9  15   4   25.00    5.20
  16  14  -2    0.10    7.80
  15  14  -1    1.30    6.30
  14  14   0   26.40    7.40
  13  14   1   47.80    8.20
  12  14   2    2.20    4.50
  17  13  -2    1.10    7.90
  16  13  -1    8.70    7.20
   9  21   0   -2.60    6.50
   8  21   1    5.50    6.40
   7  21   2    1.80    5.90
   6  21   3    7.30    6.30
  11  20  -1   12.20    8.20
  10  20   0   34.80    9.40
   9  20   1   10.10    7.10
   8  20   2    8.70    6.30
   7  20   3    7.50    5.80
   6  20   4   -5.30    4.50
  12  19  -1   20.00    8.90
  11  19   0    4.30    6.20
  10  19   1   27.30    8.00
   9  19   2    3.40    5.50
   8  19   3    7.30    5.20
   7  19   4    1.40    5.00
   6  19   5    5.00    4.60
  13  18  -1    1.40    7.50
  12  18   0   29.30    8.90
  11  18   1   12.80    6.70
  10  18   2   11.80    6.00
   9  18   3    2.60    5.00
   8  18   4   -2.40    4.40
   7  18   5   -0.20    4.20
  14  17  -1    1.90    7.10
  13  17   0   -4.30    6.10
  12  17   1   -3.30    5.40
  11  17   2    1.80    5.30
  10  17   3    3.90    5.10
   9  17   4   19.30    6.20
  15  16  -1    3.80    7.30
  14  16   0    6.80    6.50
  13  16   1    7.50    6.00
  12  16   2    2.70    5.50
  11  20   1   18.80    8.10
  10  20   2    9.80    6.70
   9  20   3    7.60    5.90
  13  19   0   -2.80    6.70
  12  19   1   24.30    8.10
  11  19   2   31.80    8.20
  10  19   3    5.50    6.30
  14  18   0   11.90    8.10
  13  18   1   -0.40    8.10

_computing_structure_solution     'SHELXT 2014/4 (Sheldrick, 2014)'
_computing_structure_solution     'SHELXT 2014/4 (Sheldrick, 2014)'
;
_shelx_hkl_checksum                69045
_olex2_submission_special_instructions  'No special instructions were received'
