# Supplementary material for: Various Approaches to Studying the Phase Transition in an Octamethylcyclotetrasiloxane Crystal: From X-ray Structural Analysis to Metadynamics
Source: Int J Mol Sci. 2022 Aug 13;23(16):9073. doi: 10.3390/ijms23169073 (PMC9408834; doi:10.3390/ijms23169073)
Supplement: Supplementary file 1 [file ijms-23-09073-s001.zip › 1-11_270.cif]

data_270
_audit_creation_date               2021-12-16
_audit_creation_method
;
Olex2 1.5
(compiled 2021.12.09 svn.r5202d8cf for OlexSys, GUI svn.r6439)
;
_shelxl_version_number             2014/6
_audit_contact_author_address      ?
_audit_contact_author_email        ?
_audit_contact_author_name         ''
_audit_contact_author_phone        ?
_publ_contact_author_id_orcid      ?
_publ_section_references
;
Dolomanov, O.V., Bourhis, L.J., Gildea, R.J, Howard, J.A.K. & Puschmann, H.
 (2009), J. Appl. Cryst. 42, 339-341.

Sheldrick, G.M. (2015). Acta Cryst. C71, 3-8.
;
_chemical_name_common              ?
_chemical_name_systematic          ?
_chemical_formula_moiety           'C8 H24 O4 Si4'
_chemical_formula_sum              'C8 H24 O4 Si4'
_chemical_formula_weight           296.63
_chemical_melting_point            ?
loop_
  _atom_type_symbol
  _atom_type_description
  _atom_type_scat_dispersion_real
  _atom_type_scat_dispersion_imag
  _atom_type_scat_source
 'C' 'C' 0.0033 0.0016 'International Tables Vol C Tables 4.2.6.8 and 6.1.1.4'
 'H' 'H' 0.0000 0.0000 'International Tables Vol C Tables 4.2.6.8 and 6.1.1.4'
 'O' 'O' 0.0106 0.0060 'International Tables Vol C Tables 4.2.6.8 and 6.1.1.4'
 'Si' 'Si' 0.0817 0.0704 'International Tables Vol C Tables 4.2.6.8 and 6.1.1.4'

_shelx_space_group_comment
;
The symmetry employed for this shelxl refinement is uniquely defined
by the following loop, which should always be used as a source of
symmetry information in preference to the above space-group names.
They are only intended as comments.
;
_space_group_crystal_system        'tetragonal'
_space_group_IT_number             88
_space_group_name_H-M_alt          'I 41/a'
_space_group_name_Hall             '-I 4ad'
loop_
  _space_group_symop_operation_xyz
 'x, y, z'
 '-x+1/2, -y, z+1/2'
 '-y+3/4, x+1/4, z+1/4'
 'y+3/4, -x+3/4, z+3/4'
 'x+1/2, y+1/2, z+1/2'
 '-x+1, -y+1/2, z+1'
 '-y+5/4, x+3/4, z+3/4'
 'y+5/4, -x+5/4, z+5/4'
 '-x, -y, -z'
 'x-1/2, y, -z-1/2'
 'y-3/4, -x-1/4, -z-1/4'
 '-y-3/4, x-3/4, -z-3/4'
 '-x+1/2, -y+1/2, -z+1/2'
 'x, y+1/2, -z'
 'y-1/4, -x+1/4, -z+1/4'
 '-y-1/4, x-1/4, -z-1/4'

_cell_length_a                     16.250(7)
_cell_length_b                     16.250(7)
_cell_length_c                     6.943(4)
_cell_angle_alpha                  90
_cell_angle_beta                   90
_cell_angle_gamma                  90
_cell_volume                       1833.3(19)
_cell_formula_units_Z              4
_cell_measurement_reflns_used      682
_cell_measurement_temperature      270
_cell_measurement_theta_max        23.781
_cell_measurement_theta_min        2.507
_shelx_estimated_absorpt_T_max     0.910
_shelx_estimated_absorpt_T_min     0.855
_exptl_absorpt_coefficient_mu      0.322
_exptl_absorpt_correction_T_max    0.7461
_exptl_absorpt_correction_T_min    0.4119
_exptl_absorpt_correction_type     multi-scan
_exptl_absorpt_process_details
;
SADABS-2014/5 (Bruker,2014/5) was used for absorption correction.
wR2(int) was 0.1542 before and 0.0633 after correction.
The Ratio of minimum to maximum transmission is 0.5521.
The \l/2 correction factor is 0.00150.
;
_exptl_absorpt_special_details     ?
_exptl_crystal_colour              colourless
_exptl_crystal_colour_primary      colourless
_exptl_crystal_density_diffrn      1.075
_exptl_crystal_density_meas        ?
_exptl_crystal_density_method      ?
_exptl_crystal_description         irregular
_exptl_crystal_F_000               640
_exptl_crystal_preparation         ?
_exptl_crystal_recrystallization_method  'in situ, in 0.3 mm capillary'
_exptl_crystal_size_max            0.5
_exptl_crystal_size_mid            0.3
_exptl_crystal_size_min            0.3
_exptl_transmission_factor_max     ?
_exptl_transmission_factor_min     ?
_diffrn_reflns_av_R_equivalents    0.0471
_diffrn_reflns_av_unetI/netI       0.0701
_diffrn_reflns_Laue_measured_fraction_full  0.987
_diffrn_reflns_Laue_measured_fraction_max  0.986
_diffrn_reflns_limit_h_max         17
_diffrn_reflns_limit_h_min         -20
_diffrn_reflns_limit_k_max         18
_diffrn_reflns_limit_k_min         -18
_diffrn_reflns_limit_l_max         8
_diffrn_reflns_limit_l_min         -8
_diffrn_reflns_number              2110
_diffrn_reflns_point_group_measured_fraction_full  0.987
_diffrn_reflns_point_group_measured_fraction_max  0.986
_diffrn_reflns_theta_full          25.242
_diffrn_reflns_theta_max           25.994
_diffrn_reflns_theta_min           2.507
_diffrn_ambient_temperature        270.00
_diffrn_detector                   'CCD area detector'
_diffrn_detector_area_resol_mean   8
_diffrn_detector_type              'Bruker SMART CCD 1K area detector'
_diffrn_measured_fraction_theta_full  0.987
_diffrn_measured_fraction_theta_max  0.986
_diffrn_measurement_device         'three-circle diffractometer'
_diffrn_measurement_device_type    'Bruker SMART APEX CCD area detector'
_diffrn_measurement_method         '\w and \f scans'
_diffrn_radiation_monochromator    graphite
_diffrn_radiation_probe            x-ray
_diffrn_radiation_type             MoK\a
_diffrn_radiation_wavelength       0.71073
_diffrn_source                     'sealed tube'
_diffrn_source_current             30.0
_diffrn_source_power               1.5
_diffrn_source_target              Mo
_diffrn_source_voltage             50.0
_diffrn_standards_number           0
_reflns_Friedel_coverage           0.000
_reflns_Friedel_fraction_full      .
_reflns_Friedel_fraction_max       .
_reflns_number_gt                  514
_reflns_number_total               886
_reflns_special_details
;
 Reflections were merged by SHELXL according to the crystal
 class for the calculation of statistics and refinement.
 
 _reflns_Friedel_fraction is defined as the number of unique
 Friedel pairs measured divided by the number that would be
 possible theoretically, ignoring centric projections and
 systematic absences.
;
_reflns_threshold_expression       'I > 2\s(I)'
_computing_cell_refinement         'SAINT v8.34A (Bruker, 2013)'
_computing_data_collection         ?
_computing_data_reduction          'SAINT v8.34A (Bruker, 2013)'
_computing_molecular_graphics      'Olex2 1.5 (Dolomanov et al., 2009)'
_computing_publication_material    'Olex2 1.5 (Dolomanov et al., 2009)'
_computing_structure_refinement    'SHELXL 2014/6 (Sheldrick, 2015)'
_computing_structure_solution      'SHELXT 2014/4 (Sheldrick, 2014)'
_refine_diff_density_max           0.720
_refine_diff_density_min           -0.409
_refine_diff_density_rms           0.086
_refine_ls_extinction_coef         .
_refine_ls_extinction_method       none
_refine_ls_goodness_of_fit_ref     1.043
_refine_ls_hydrogen_treatment      constr
_refine_ls_matrix_type             full
_refine_ls_number_parameters       39
_refine_ls_number_reflns           886
_refine_ls_number_restraints       0
_refine_ls_R_factor_all            0.1410
_refine_ls_R_factor_gt             0.0907
_refine_ls_restrained_S_all        1.043
_refine_ls_shift/su_max            0.000
_refine_ls_shift/su_mean           0.000
_refine_ls_structure_factor_coef   Fsqd
_refine_ls_weighting_details      
 'w=1/[\s^2^(Fo^2^)+(0.1569P)^2^+4.7113P] where P=(Fo^2^+2Fc^2^)/3'
_refine_ls_weighting_scheme        calc
_refine_ls_wR_factor_gt            0.2354
_refine_ls_wR_factor_ref           0.2999
_refine_special_details            ?
_olex2_refinement_description
;
1.a Idealised Me refined as rotating group:
 C003(H00A,H00B,H00C), C004(H00D,H00E,H00F)
;
_atom_sites_solution_hydrogens     geom
_atom_sites_solution_primary       dual
_atom_sites_solution_secondary     ?
loop_
  _atom_site_label
  _atom_site_type_symbol
  _atom_site_fract_x
  _atom_site_fract_y
  _atom_site_fract_z
  _atom_site_U_iso_or_equiv
  _atom_site_adp_type
  _atom_site_occupancy
  _atom_site_site_symmetry_order
  _atom_site_calc_flag
  _atom_site_refinement_flags_posn
  _atom_site_refinement_flags_adp
  _atom_site_refinement_flags_occupancy
  _atom_site_disorder_assembly
  _atom_site_disorder_group
 Si01 Si 0.38384(10) 0.81785(9) 0.6645(3) 0.0684(9) Uani 1 1 d . . . . .
 O002 O 0.4684(2) 0.8583(3) 0.5800(8) 0.0858(18) Uani 1 1 d . . . . .
 C003 C 0.2985(4) 0.8496(6) 0.5050(15) 0.127(4) Uani 1 1 d . . . . .
 H00A H 0.3086 0.8299 0.3768 0.190 Uiso 1 1 calc R U . . .
 H00B H 0.2947 0.9086 0.5035 0.190 Uiso 1 1 calc R U . . .
 H00C H 0.2478 0.8268 0.5519 0.190 Uiso 1 1 calc R U . . .
 C004 C 0.3629(8) 0.8537(6) 0.9073(15) 0.136(4) Uani 1 1 d . . . . .
 H00D H 0.3133 0.8284 0.9539 0.203 Uiso 1 1 calc R U . . .
 H00E H 0.3564 0.9124 0.9064 0.203 Uiso 1 1 calc R U . . .
 H00F H 0.4080 0.8391 0.9900 0.203 Uiso 1 1 calc R U . . .

loop_
  _atom_site_aniso_label
  _atom_site_aniso_U_11
  _atom_site_aniso_U_22
  _atom_site_aniso_U_33
  _atom_site_aniso_U_23
  _atom_site_aniso_U_13
  _atom_site_aniso_U_12
 Si01 0.0535(11) 0.0506(11) 0.1011(17) 0.0000(9) 0.0148(9) 0.0016(6)
 O002 0.048(2) 0.072(3) 0.137(5) 0.025(3) 0.012(2) 0.0018(19)
 C003 0.059(4) 0.145(8) 0.176(10) 0.052(8) -0.009(5) -0.012(5)
 C004 0.170(10) 0.103(7) 0.134(9) -0.022(6) 0.040(7) -0.037(7)

_geom_special_details
;
 All esds (except the esd in the dihedral angle between two l.s. planes)
 are estimated using the full covariance matrix.  The cell esds are taken
 into account individually in the estimation of esds in distances, angles
 and torsion angles; correlations between esds in cell parameters are only
 used when they are defined by crystal symmetry.  An approximate (isotropic)
 treatment of cell esds is used for estimating esds involving l.s. planes.
;
loop_
  _geom_bond_atom_site_label_1
  _geom_bond_atom_site_label_2
  _geom_bond_distance
  _geom_bond_site_symmetry_2
  _geom_bond_publ_flag
 Si01 O002 1.621(4) 12_767 ?
 Si01 O002 1.633(4) . ?
 Si01 C003 1.849(8) . ?
 Si01 C004 1.815(10) . ?
 O002 Si01 1.621(4) 15_566 ?
 C003 H00A 0.9600 . ?
 C003 H00B 0.9600 . ?
 C003 H00C 0.9600 . ?
 C004 H00D 0.9600 . ?
 C004 H00E 0.9600 . ?
 C004 H00F 0.9600 . ?

loop_
  _geom_angle_atom_site_label_1
  _geom_angle_atom_site_label_2
  _geom_angle_atom_site_label_3
  _geom_angle
  _geom_angle_site_symmetry_1
  _geom_angle_site_symmetry_3
  _geom_angle_publ_flag
 O002 Si01 O002 110.1(3) 12_767 . ?
 O002 Si01 C003 110.6(4) 12_767 . ?
 O002 Si01 C003 107.7(3) . . ?
 O002 Si01 C004 108.2(4) 12_767 . ?
 O002 Si01 C004 111.3(4) . . ?
 C004 Si01 C003 109.0(6) . . ?
 Si01 O002 Si01 149.6(3) 15_566 . ?
 Si01 C003 H00A 109.5 . . ?
 Si01 C003 H00B 109.5 . . ?
 Si01 C003 H00C 109.5 . . ?
 H00A C003 H00B 109.5 . . ?
 H00A C003 H00C 109.5 . . ?
 H00B C003 H00C 109.5 . . ?
 Si01 C004 H00D 109.5 . . ?
 Si01 C004 H00E 109.5 . . ?
 Si01 C004 H00F 109.5 . . ?
 H00D C004 H00E 109.5 . . ?
 H00D C004 H00F 109.5 . . ?
 H00E C004 H00F 109.5 . . ?

loop_
  _geom_torsion_atom_site_label_1
  _geom_torsion_atom_site_label_2
  _geom_torsion_atom_site_label_3
  _geom_torsion_atom_site_label_4
  _geom_torsion
  _geom_torsion_site_symmetry_1
  _geom_torsion_site_symmetry_2
  _geom_torsion_site_symmetry_3
  _geom_torsion_site_symmetry_4
  _geom_torsion_publ_flag
 O002 Si01 O002 Si01 -51.5(6) 12_767 . . 15_566 ?
 C003 Si01 O002 Si01 -172.1(7) . . . 15_566 ?
 C004 Si01 O002 Si01 68.5(8) . . . 15_566 ?

_shelx_res_file
;
TITL 270_a.res in I4(1)/a
REM Old TITL 270_a.res in I4(1)/a
REM SHELXT solution in I4(1)/a
REM R1 0.250, Rweak 0.013, Alpha 0.013, Orientation as input
REM Formula found by SHELXT: C2 O Si
CELL 0.71073 16.25 16.25 6.9428 90 90 90
ZERR 4 0.0071 0.0071 0.0036 0 0 0
LATT 2
SYMM 0.5-X,-Y,0.5+Z
SYMM 0.75-Y,0.25+X,0.25+Z
SYMM 0.75+Y,0.75-X,0.75+Z
SFAC C H O Si
UNIT 32 96 16 16

L.S. 4
PLAN  4
SIZE 0.3 0.3 0.5
TEMP -3.15
CONF
BOND $H
list 4
fmap 2
acta
MORE -1
OMIT -4 52
REM <olex2.extras>
REM <HklSrc "%.\\270.hkl">
REM </olex2.extras>

WGHT    0.156900    4.711300
FVAR       0.49713
SI01  4    0.383840    0.817846    0.664543    11.00000    0.05346    0.05062 =
         0.10107    0.00003    0.01475    0.00162
O002  3    0.468441    0.858282    0.579953    11.00000    0.04802    0.07239 =
         0.13707    0.02492    0.01205    0.00182
C003  1    0.298472    0.849619    0.505009    11.00000    0.05886    0.14527 =
         0.17635    0.05210   -0.00902   -0.01188
AFIX 137
H00A  2    0.308633    0.829938    0.376821    11.00000   -1.50000
H00B  2    0.294685    0.908570    0.503499    11.00000   -1.50000
H00C  2    0.247770    0.826846    0.551862    11.00000   -1.50000
AFIX   0
C004  1    0.362915    0.853664    0.907300    11.00000    0.17006    0.10275 =
         0.13412   -0.02217    0.04048   -0.03707
AFIX 137
H00D  2    0.313342    0.828448    0.953915    11.00000   -1.50000
H00E  2    0.356362    0.912375    0.906390    11.00000   -1.50000
H00F  2    0.407976    0.839113    0.989980    11.00000   -1.50000
AFIX   0
HKLF 4

REM  270_a.res in I4(1)/a
REM R1 =  0.0907 for     514 Fo > 4sig(Fo)  and  0.1410 for all     886 data
REM     39 parameters refined using      0 restraints

END

WGHT      0.1564      4.7516

REM Highest difference peak  0.720,  deepest hole -0.409,  1-sigma level  0.086
Q1    1   0.3949  0.8123  0.8187  11.00000  0.05    0.72
Q2    1   0.3831  0.8224  0.5102  11.00000  0.05    0.64
Q3    1   0.4749  0.8522  0.7200  11.00000  0.05    0.46
Q4    1   0.3121  0.8619  0.6761  11.00000  0.05    0.34
;
_shelx_res_checksum                16333
_shelx_hkl_file
;
  -1   1   0   -0.10    0.20
   1  -1   0    0.80    0.40
   1  -1   0    0.00    0.20
   1   1   0    0.30    0.50
  -1   1   0    0.00    0.30
  -1  -1   0   -0.20    0.40
   0  -2   0 4642.74  281.87
  -2   0   0 4509.95  281.07
  -2   0   0 4356.26  281.47
   2   0   0 4016.50  280.77
   2   0   0 4524.75  281.37
   2   2   0   25.60    3.30
   2  -2   0   27.10    2.90
  -2   2   0   24.90    2.20
   3   1   0    1.50    1.10
  -3  -1   0    1.20    1.10
  -3  -1   0    0.70    0.90
  -3   1   0    1.10    0.90
  -3   1   0   -0.50    1.10
   3  -1   0   -0.20    0.90
  -1  -3   0    0.70    1.10
  -3  -3   0    4.10    2.20
  -3   3   0    1.10    1.40
  -3   3   0    2.10    2.00
  -2   4   0 9507.85  591.24
  -2   4   0 9462.85  592.64
   2  -4   0 8954.20  592.54
  -4   0   0 9844.42  628.34
   0  -4   0 9999.00  629.64
  -4   0   0 9769.72  628.74
   4   0   0 9970.50  628.94
  -4   2   0 1055.49   67.79
  -2  -4   0 1127.49   68.39
  -4   2   0 1048.20   68.29
   4  -2   0 1003.60   68.19
  -4   4   0   63.29    5.70
   4   4   0   72.89    7.70
   4  -4   0   63.49    7.00
  -4   4   0   70.19    7.50
  -3   5   0   -1.60    1.60
   5   3   0    3.70    2.50
  -5  -3   0    0.60    2.10
  -3   5   0   -0.30    2.50
  -1   5   0   -2.80    2.30
   1  -5   0   -1.90    2.10
  -5  -1   0   -6.10    1.90
  -1  -5   0   -3.00    2.20
  -5   1   0   -2.90    2.00
  -5   1   0   -0.20    1.90
   1   5   0   -3.30    2.30
   5  -1   0   -3.40    1.90
  -5   3   0   -4.00    2.30
   5  -3   0   -4.70    2.20
  -3  -5   0    3.50    2.60
  -5   3   0   -2.00    1.70
  -5   5   0   -1.80    1.90
   5   5   0   -0.80    3.00
  -5  -5   0   -2.70    2.70
   5  -5   0   -4.10    2.30
  -4   6   0  116.19    8.70
   6   2   0  194.88   13.80
  -6  -2   0  172.88   13.20
   2  -6   0  185.28   14.10
  -2   6   0  199.38   14.30
  -6  -2   0  193.68   13.60
  -6   0   0 3877.51  245.38
   0  -6   0 3767.62  245.78
   6   0   0 3841.82  245.48
   0   6   0 3950.30  245.88
  -2  -6   0  104.29    9.10
  -2  -6   0   90.19    8.70
   6  -2   0   75.99    7.80
  -6   2   0   82.19    8.60
  -6   4   0 1287.97   82.99
  -6   4   0 1275.97   83.79
  -4  -6   0 1364.06   83.89
   4   6   0 1319.47   83.99
   6  -4   0 1211.38   83.59
  -6   6   0   28.50    5.20
  -6   6   0   34.80    4.90
  -6  -6   0   24.90    4.80
   7   5   0   -4.00    3.00
  -5   7   0   -2.60    3.40
   5  -7   0   -6.30    3.00
  -5   7   0   -1.90    2.30
  -7  -3   0    2.60    2.40
   7   3   0    3.50    2.60
   7   1   0   -1.70    2.20
  -7  -1   0    0.10    2.10
  -1   7   0    1.60    2.50
   1  -7   0   -1.10    2.20
  -7  -1   0   -3.80    2.20
  -7   1   0   -2.40    2.20
   1   7   0   -0.20    2.40
  -7   3   0   -0.50    2.50
   7  -3   0    5.30    2.50
  -3  -7   0    2.70    3.10
  -7   3   0    4.80    2.70
  -3  -7   0    5.40    3.20
   7  -5   0   -3.90    3.30
  -5  -7   0   -3.20    3.30
   5   7   0    4.80    4.00
  -7   5   0    0.60    2.60
   7   7   0   -1.30    4.00
  -7   7   0   -3.00    3.00
  -7   7   0   -5.90    3.60
  -6   8   0  262.67   17.80
  -6   8   0  263.97   20.30
   6  -8   0  222.08   19.70
   8   6   0  254.77   19.70
  -8  -6   0  249.78   19.20
  -4   8   0  571.24   38.80
   4  -8   0  564.94   38.50
  -8  -4   0  580.34   38.10
   8   4   0  599.14   38.40
  -4   8   0  535.45   37.20
   2  -8   0 2126.29  133.69
  -8  -2   0 2098.69  133.19
   8   2   0 2087.59  133.19
  -8  -2   0 2003.50  132.99
   8   0   0   30.80    4.30
  -8   0   0   41.80    5.30
   0  -8   0   29.60    4.80
  -8   2   0   17.80    3.80
  -8   2   0   13.90    3.60
   8  -2   0   12.20    3.60
  -2  -8   0   11.30    4.30
  -2  -8   0   12.50    4.20
  -4  -8   0 1255.57   86.59
  -4  -8   0 1395.46   87.39
  -8   4   0 1301.17   86.59
  -8   4   0 1377.16   85.99
  -8   6   0   61.09   10.40
   6   8   0   70.09   11.80
  -8   6   0   78.49    8.00
  -6  -8   0   81.09   10.10
   8  -6   0   72.39    8.50
   8   8   0 1275.17   88.19
  -8   8   0 1395.96   87.39
  -8  -8   0 1343.27   88.19
   8  -8   0 1372.16   88.29
   7  -9   0   19.20    5.40
   9   7   0    5.40    5.40
  -7   9   0   18.00    5.30
  -9  -7   0   11.70    4.80
  -9  -5   0   10.20    3.80
  -5   9   0   -5.40    3.60
  -3   9   0    9.70    3.60
   3  -9   0    8.40    3.70
   9   1   0    3.70    3.60
  -1   9   0   -1.10    3.60
  -9  -1   0    3.10    3.40
  -9   1   0   -5.50    3.00
  -9   1   0   -2.30    3.10
  -3  -9   0   -3.40    3.40
  -9   3   0   -3.70    3.20
  -5  -9   0   -4.00    3.70
  -9   5   0   -1.10    3.40
   9  -7   0   -4.70    5.10
  -7  -9   0    2.30    4.50
  -9   9   0    2.90    5.60
  -9   9   0    1.40    5.80
  -9  -9   0   -0.40    5.10
 -10  -8   0 1484.65   98.29
  -8  10   0 1521.35   99.19
   8 -10   0 1532.65   98.39
  -8  10   0 1501.65   97.19
  10   8   0 1459.15   98.29
  -6  10   0  328.77   23.10
   6 -10   0  328.97   25.80
 -10  -6   0  330.17   25.00
   4 -10   0 1260.17   81.69
  10   4   0 1241.18   81.39
 -10  -4   0 1235.68   81.09
 -10  -2   0 3318.17  209.78
  -2  10   0 3403.66  210.68
 -10  -2   0 3122.29  209.58
 -10   0   0  282.47   22.40
 -10   0   0  368.66   22.40
   0 -10   0  310.97   24.00
   0  10   0  290.07   23.30
 -10   2   0 1165.48   76.99
 -10   2   0 1235.78   76.49
  -2 -10   0 1148.49   77.09
  -2 -10   0 1169.88   77.79
  10  -2   0 1158.48   76.89
  -4 -10   0  118.99   13.90
 -10   4   0  156.58   12.30
  -6 -10   0  219.78   22.00
 -10   6   0  229.78   19.40
  -6 -10   0  206.58   18.80
  10  -6   0  183.98   18.70
 -10   6   0  239.88   17.30
  10  -8   0  -10.30    5.70
  10  10   0   54.59    8.80
 -10  10   0   64.99    9.70
  11   9   0    8.20    5.40
  -9  11   0    7.00    4.80
  -7  11   0    3.30    5.10
 -11  -7   0   -5.40    5.10
  11   7   0   13.30    5.80
   7 -11   0   10.20    5.70
  -5  11   0   -9.10    4.70
  -3  11   0    3.10    4.80
  11   3   0    4.30    5.10
 -11  -3   0    6.40    4.50
 -11  -1   0   -6.20    4.50
  -1 -11   0   -5.40    4.90
 -11   1   0   -0.90    4.20
  11  -1   0   -9.00    4.50
  -3 -11   0    0.70    4.90
  -3 -11   0   -2.40    5.80
 -11   3   0   -3.00    4.70
 -11   3   0    2.70    4.70
 -11   5   0   -0.30    4.60
  -7 -11   0   -1.30    6.70
 -11   7   0   -3.10    5.10
 -11   7   0    0.30    5.20
  -7 -11   0   -9.50    4.90
  11  -7   0    3.10    5.30
 -11   9   0   -3.70    5.10
 -11  11   0   -0.70    5.40
 -10  12   0    3.00    5.30
  10 -12   0   -0.80    6.30
   8 -12   0    4.60    5.90
 -12  -8   0   -6.70    5.60
  -8  12   0   14.20    4.80
  12   8   0   12.80    5.90
   6 -12   0    6.10    6.30
 -12  -6   0   -2.20    4.80
  -6  12   0    7.10    6.00
  -4  12   0  221.78   19.80
   4 -12   0  216.88   19.60
 -12  -4   0  217.38   18.60
  12   4   0  217.08   19.30
  12   2   0   93.89   13.50
 -12  -2   0  121.69   11.80
   2 -12   0   91.79   14.30
  -2  12   0   88.99   14.10
   0 -12   0  218.28   20.00
   0  12   0  219.18   19.20
  12   0   0  238.38   19.00
 -12   0   0  186.28   18.20
 -12   0   0  237.68   18.00
  -2 -12   0 1508.95  103.69
  -2 -12   0 1605.84  104.49
  12  -2   0 1630.64  103.39
 -12   2   0 1601.14  103.09
 -12   4   0  150.58   15.60
  -6 -12   0  743.73   55.49
  -6 -12   0  858.51   57.49
 -12   6   0  824.52   55.69
  12  -6   0  827.82   54.99
 -12   6   0  824.02   54.89
  -8 -12   0  759.12   55.49
 -12   8   0  823.92   52.29
  12  -8   0  796.92   52.79
  -8 -12   0  687.13   52.99
  12 -10   0    7.40    6.60
 -12  10   0   17.80    6.60
 -12  12   0    2.30    7.00
 -11  13   0   -8.10    6.60
   9 -13   0    5.60    7.00
  -9  13   0    4.20    5.30
  -7  13   0   -7.20    3.90
  13   7   0    2.00    5.30
  13   5   0   -4.70    5.10
 -13  -3   0    8.80    6.20
   1 -13   0   -4.20    4.60
  13   1   0   -1.20    4.80
 -13  -1   0    0.60    3.60
 -13  -1   0  -11.90    5.60
  -1  13   0   -1.00    4.30
  13  -1   0    4.90    4.90
  -1 -13   0    3.30    5.30
 -13   1   0    7.10    4.40
  -3 -13   0   -4.70    5.00
  -3 -13   0   14.30    6.30
  13  -3   0    1.00    5.20
 -13   3   0    1.90    4.60
 -13   3   0   -7.80    5.00
  -5 -13   0    0.70    5.10
 -13   5   0    9.60    4.70
  -5 -13   0   11.40    7.10
  13  -5   0   14.10    5.70
 -13   7   0   -4.30    6.70
  13  -9   0    3.60    7.20
 -13   9   0    0.10    6.30
 -13  11   0   -3.80    6.80
 -13  13   0    1.80    7.40
 -12  14   0   -2.00    6.70
 -10  14   0  226.18   19.30
  -8  14   0  202.88   16.70
   6 -14   0   36.80    7.70
  14   4   0  333.37   25.60
   4 -14   0  307.57   25.80
  14   2   0  132.59   15.30
 -14  -2   0  136.19   14.20
  14   0   0   11.40    5.70
   0  14   0   19.70    6.70
   0 -14   0   18.30    6.40
 -14   0   0   12.10    6.30
 -14   0   0   15.30    4.70
  -2 -14   0    4.30    6.00
 -14   2   0   10.40    5.50
  14  -2   0    1.40    5.10
  -2 -14   0   -9.80    5.60
 -14   2   0    5.20    5.30
  -4 -14   0    1.30    6.40
  -4 -14   0   -0.30    4.90
  -6 -14   0  128.29   18.90
  14  -6   0  135.69   15.80
 -14   8   0  151.68   16.30
 -14  10   0   -7.90    6.30
 -14  12   0  129.29   16.50
 -14  14   0   28.00    9.20
 -13  15   0    0.00    7.20
 -11  15   0    2.00    6.00
   5 -15   0    4.10    7.40
  15   3   0    2.00    6.50
   3 -15   0   -1.80    6.00
 -15  -3   0    4.50    6.70
 -15  -1   0    5.30    6.10
   1 -15   0   -8.80    5.00
 -15   1   0   -2.20    5.20
  -1 -15   0   -2.60    5.80
  -3 -15   0   -9.90    6.00
 -15   3   0   -9.30    5.20
  -5 -15   0  -10.30    8.00
 -15   7   0  -10.50    6.60
 -15   9   0   -9.70    6.70
 -15  11   0  -10.50    8.00
 -15  13   0    2.60    8.50
 -15  15   0  -10.70    7.90
 -14  16   0    9.10    8.70
 -12  16   0   -0.80    7.00
 -10  16   0    8.50    5.70
 -16  -4   0   96.29   13.90
 -16  -2   0   -9.10    6.40
 -16   0   0   83.39   11.10
 -16   2   0  117.99   13.70
 -16   4   0   -7.30    5.80
 -16   6   0   45.10    8.60
 -16   8   0   19.30    8.20
 -16  10   0    2.60    8.60
 -16  12   0   24.40    9.80
 -16  14   0   -2.90    8.90
 -16  16   0    5.10    9.70
 -15  17   0    8.00    9.20
 -13  17   0  -10.00    7.70
 -11  17   0   -5.80    6.50
 -17  -3   0   -7.30    6.70
 -17  -1   0  -13.00    6.50
 -17   1   0   -6.30    6.80
 -17   3   0    5.00    6.40
 -17   5   0   -0.30    6.90
 -17   7   0    2.30    7.40
 -17   9   0   -8.70    8.10
 -17  11   0   -3.60    8.40
 -17  13   0    5.10    9.30
 -17  15   0    7.00   10.00
 -14  18   0   10.50    8.90
 -12  18   0   22.20    8.60
 -18  -2   0  -13.90    7.00
 -18   0   0    7.10    7.70
 -18   2   0   85.29   13.50
 -18   4   0  -14.60    7.00
 -18   6   0  111.09   16.00
 -18   8   0   41.00   10.20
 -18  10   0    3.90    8.70
 -18  12   0   31.70   10.70
 -18  14   0   -6.50    9.90
 -19  -3   0    1.00    7.80
 -19  -1   0   -5.00    7.00
 -19   1   0   -9.60    6.50
 -19   3   0   -6.30    7.00
 -19   5   0   -5.20    8.40
 -19   7   0    3.70    8.50
 -19   9   0   -4.00    8.50
 -19  11   0   21.10   10.40
 -19  13   0   13.60   10.70
 -20  -2   0    7.20    8.20
 -20   0   0   11.50    7.70
 -20   2   0   -1.40    6.80
 -20   4   0   -5.70    7.40
 -20   6   0   12.40    8.30
 -20   8   0    0.40    8.70
 -20  10   0   28.70   11.30
 -20  12   0   45.90   12.40
 -21  -3   0   -8.20    8.80
 -21  -1   0    1.30    8.20
 -21   1   0    8.90    7.90
 -21   3   0   -7.70    7.00
 -21   5   0    6.60    7.90
 -21   7   0   12.20    8.90
 -21   9   0   -3.00    9.50
 -22   0   0   45.20   10.10
 -22   2   0    7.30    7.60
 -22   4   0   24.90    9.30
 -22   6   0   14.00    8.70
 -23  -1   0   12.20    8.90
 -23   1   0   -0.20    7.60
 -23   3   0    2.40    8.00
  -1   0   1 8790.42  557.24
   0  -1   1 8746.23  556.84
  -1   2  -1  832.22   53.09
  -2   1  -1  471.15   30.30
  -2   1   1  471.35   30.40
  -2   3  -1 2648.44  190.08
  -3  -2   1 3342.17  190.78
  -3   0   1    1.80    1.40
   0  -3   1    3.50    2.50
  -3   2  -1 1434.36   93.89
  -2  -3   1 1620.24   94.69
  -3   2   1 1373.86   93.99
  -3   4  -1  355.56   24.70
  -4  -3   1  404.16   25.60
  -1   4  -1 2879.31  205.08
  -4  -1   1 3581.04  205.48
  -4   1  -1 1034.00   67.29
  -4   1   1 1036.10   67.49
  -1  -4   1 1095.59   68.29
  -4   3  -1  785.72   51.29
  -4   3   1  813.62   51.49
   5   4  -1  180.78   12.40
  -4   5  -1  142.59   10.90
  -5  -4   1  140.89   12.10
  -2   5  -1  233.48   16.40
  -5  -2   1  257.67   17.00
   0   5  -1  301.27   21.50
  -5   0  -1  329.17   21.40
  -5   0   1  351.56   21.90
  -5   2  -1   67.59    5.50
  -2  -5   1   72.39    7.90
  -5   2   1   72.29    6.00
  -5   4  -1    1.50    1.60
  -5   4   1    2.90    2.10
   5  -6  -1   40.90    7.20
  -6  -5  -1   43.50    5.50
  -5   6  -1   43.60    4.90
  -5   6   1   56.09    5.60
   6   3  -1 1079.09   66.49
  -3   6  -1  975.30   65.99
  -6  -3   1 1028.30   66.49
  -1   6  -1 1024.20   69.29
  -6  -1   1 1138.29   69.69
  -6   1  -1  131.99    9.70
  -6   1   1  141.89   10.20
  -6   3  -1  436.06   29.80
  -3  -6   1  473.95   31.20
  -6   3   1  462.85   30.20
  -6   5  -1   24.60    3.70
   5   6  -1   13.40    4.50
  -6   5   1   20.70    3.50
   6  -5   1   15.70    4.10
  -6   7  -1    1.20    2.30
  -6   7  -1   -2.80    3.40
  -6   7   1   -2.10    2.90
   6  -7   1   -6.20    3.30
  -4   7  -1  835.02   54.49
  -7  -4  -1  820.62   53.99
  -4   7  -1  830.92   53.19
  -7  -4   1  804.82   53.99
  -2   7  -1  169.38   12.20
  -2   7  -1  164.88   13.50
  -7  -2   1  185.38   13.00
   0   7  -1  935.71   60.49
  -7   0  -1  947.61   60.49
  -7   0   1  938.01   60.89
  -7   2  -1  226.58   15.90
  -7   2  -1  220.58   17.10
  -7   2   1  249.58   16.50
   7  -2   1  234.38   17.10
  -7   4  -1 1130.99   73.99
   7  -4  -1 1187.48   74.89
  -7   4  -1 1153.88   75.09
  -7   4   1 1136.79   74.39
   6   7  -1  373.16   25.90
   7  -6  -1  340.17   25.30
  -7   6  -1  335.17   23.80
  -7   6  -1  347.27   25.50
  -7   6   1  372.16   24.40
  -7   8  -1  550.44   37.80
   8   7  -1  629.74   39.90
  -7   8  -1  574.14   39.80
  -7   8   1  529.55   38.20
  -8  -7   1  569.34   39.20
  -5   8  -1   -5.80    2.50
  -5   8  -1   -2.00    3.30
   5  -8   1   -5.50    3.40
  -3   8  -1  343.47   24.50
  -8  -3  -1  332.97   23.80
  -3   8  -1  350.06   23.20
  -8  -3   1  333.57   24.10
   3  -8   1  363.86   24.50
  -1   8  -1  707.83   44.80
  -8  -1  -1  712.73   44.90
  -1   8  -1  641.24   45.80
  -8  -1   1  692.33   45.30
  -8   1  -1  101.79    9.80
  -1  -8  -1  113.89   11.00
  -8   1  -1  126.99    8.90
   1   8  -1   91.39   10.20
  -8   1   1  133.59    9.50
   8  -1   1   97.49   10.10
  -3  -8  -1  454.35   30.70
  -8   3  -1  413.46   28.80
  -8   3  -1  439.86   30.00
   8  -3   1  440.36   29.90
  -8   3   1  425.46   29.40
  -8   5  -1   34.10    5.50
  -8   5  -1   30.80    4.30
   8  -5   1   31.70    5.30
  -8   5   1   35.60    5.00
   7   8  -1  527.35   34.70
  -8   7  -1  494.25   34.10
  -8   7  -1  474.25   32.30
  -7  -8   1  471.85   33.80
   7   8   1  440.56   34.20
   8  -7   1  508.05   34.20
  -8   7   1  451.75   33.00
  -8   9  -1  668.03   47.20
  -8   9  -1  650.83   45.00
  -8   9   1  699.03   45.80
   8  -9   1  691.63   46.60
  -9  -6  -1   93.09   11.70
   9   6  -1   93.49   12.90
  -6   9  -1  104.79    8.80
  -6   9   1  104.59   12.70
   9   6   1   71.49    9.60
  -9  -4  -1  579.94   39.10
  -4   9  -1  578.24   38.40
  -4   9  -1  588.54   39.90
   9   4   1  564.74   39.40
   4  -9   1  634.14   39.90
  -9  -4   1  590.24   39.10
  -9  -4   1  541.75   39.60
   9   2  -1  902.71   55.39
   2  -9  -1  882.21   55.79
  -2   9  -1  842.22   54.49
  -9  -2  -1  790.82   55.09
  -2   9  -1  822.72   55.79
  -9  -2   1  818.82   55.19
   2  -9   1  824.22   55.69
   9   0  -1    8.70    3.80
   0   9  -1    8.90    3.70
  -9   0  -1    8.70    3.30
   0  -9  -1    9.30    4.20
  -9   0   1   17.90    3.80
  -9   2  -1   70.99    9.70
  -9   2  -1   86.89    7.80
  -9   2   1   94.09    8.40
  -2  -9   1   79.09   10.30
  -9   4  -1   43.10    6.10
  -4  -9  -1   44.60    7.40
   9  -4   1   40.50    5.90
  -9   4   1   59.49    6.90
  -4  -9   1   35.80    7.00
  -9   6  -1  115.69    9.80
  -9   6   1   79.99   10.70
   8   9  -1  151.48   17.90
  -8  -9  -1  155.18   15.30
  -9   8  -1  149.88   16.00
  -9   8  -1  148.89   13.40
  -9  10  -1  230.38   23.30
  -9  10  -1  283.67   19.90
 -10  -9  -1  216.98   22.10
   9 -10  -1  270.47   22.50
  10   9  -1  286.47   22.50
  -9  10   1  246.58   20.50
   9 -10   1  274.97   22.70
  10   9   1  267.47   21.90
  -7  10  -1  602.84   38.80
 -10  -7  -1  576.54   40.60
  -7  10  -1  558.54   40.80
   7 -10   1  622.74   40.90
  -7  10   1  536.25   39.00
  -5  10  -1   79.49    8.20
  10   5  -1   73.79   12.50
 -10  -5  -1   64.59   10.60
   5 -10   1   63.19   12.10
 -10  -5   1   89.79   10.20
  -3  10  -1 1179.98   83.09
  -3  10  -1 1300.57   81.79
 -10  -3  -1 1248.78   82.59
 -10  -3   1 1319.17   82.89
 -10  -3   1 1308.17   82.59
  -3  10   1 1258.07   83.29
 -10  -1  -1  700.83   44.00
 -10  -1  -1  607.24   44.30
  -1  10  -1  635.44   45.20
  -1  10  -1  726.23   43.50
 -10  -1   1  652.43   44.30
  10  -1   1   30.80    5.70
 -10   1   1   51.59    6.60
  -1 -10   1   35.50    6.60
 -10   3  -1  150.98   11.40
 -10   3   1  139.19   12.10
  -3 -10   1  144.69   14.20
  -3 -10   1  107.99   15.10
  -5 -10  -1   -4.60    6.50
 -10   5  -1   13.00    4.20
 -10   5  -1    5.00    4.80
 -10   5   1   17.60    4.90
 -10   7  -1   -5.70    4.50
  -7 -10  -1   -0.60    4.80
 -10   7  -1   -1.00    4.20
  10  -7   1   -3.00    5.00
 -10   9  -1   21.60    5.60
 -10   9  -1   -2.40    5.90
  10  -9  -1    0.80    6.60
   9  10  -1   23.70    7.60
  10  -9   1    9.50    6.60
 -10   9   1    7.70    6.20
 -10  11  -1    4.70    4.80
 -10  11   1    3.50    5.30
   8 -11  -1  208.98   19.10
 -11  -8  -1  174.38   19.50
  -8  11  -1  154.68   18.30
  -8  11  -1  226.48   15.80
  -8  11   1  201.58   16.10
  -6  11  -1  142.09   16.00
  11   6  -1  156.68   17.00
 -11  -6  -1  126.99   15.30
  -6  11  -1  173.38   12.60
   6 -11   1  158.18   16.80
 -11  -4  -1  285.97   22.10
  -4  11  -1  271.87   20.20
   4 -11  -1  301.57   23.10
  -4  11  -1  269.57   22.80
 -11  -4   1  306.57   22.70
   4 -11   1  285.47   22.80
  11   2  -1  887.01   55.89
   2 -11  -1  858.51   56.39
 -11  -2  -1  775.02   55.59
  -2  11  -1  874.51   54.39
  -2  11  -1  804.32   56.49
 -11  -2   1  833.32   55.49
  -2  11   1  805.12   56.49
 -11   0  -1    7.50    4.70
   0  11  -1   -8.00    4.10
 -11   0   1   -4.20    4.70
 -11   2  -1 1049.00   71.89
  -2 -11  -1 1138.89   73.49
 -11   2  -1 1106.69   72.99
 -11   2   1 1137.19   72.69
  11  -2   1 1083.79   72.89
 -11   2   1 1170.88   73.19
  -2 -11   1 1062.09   73.69
 -11   4  -1  146.89   15.20
  -4 -11  -1  145.39   15.90
  -4 -11   1  153.68   18.30
 -11   6  -1  393.06   29.70
 -11   6  -1  397.96   27.80
  -6 -11  -1  373.56   29.60
 -11   6   1  421.66   28.80
  -8 -11  -1  254.77   23.90
 -11   8  -1  290.57   21.00
 -11   8  -1  250.87   23.30
  -8 -11   1  261.67   25.80
  11  -8   1  287.07   22.70
 -11   8   1  290.47   21.90
  10  11  -1    6.70    7.30
 -11  10  -1    3.60    4.90
 -11  10   1    5.20    5.50
 -11  12  -1    3.50    5.90
  11 -12  -1    7.40    6.40
 -11  12   1   -4.70    6.80
  12   9  -1    7.20    6.30
   9 -12  -1   -8.20    5.70
  -9  12  -1   15.40    4.90
  -7  12  -1   -1.70    4.80
  -7  12  -1    6.50    3.90
  12   7  -1    4.20    5.70
  -5  12  -1   -1.40    3.30
 -12  -5   1   -2.20    6.20
   3 -12  -1   90.59   13.40
  -3  12  -1   64.39   12.50
   3 -12   1   71.79    9.60
 -12  -3   1  107.29   11.60
  -1  12  -1   -4.60    4.10
 -12  -1  -1   -6.10    3.60
 -12   1  -1  334.27   28.30
 -12   1  -1  406.06   29.10
  12  -1  -1  454.95   29.50
  -1 -12  -1  460.45   30.90
  -1 -12   1  381.86   30.20
  12  -1   1  415.66   29.40
 -12   1   1  366.06   29.40
 -12   3  -1  428.06   32.10
 -12   3  -1  436.36   33.50
  -3 -12  -1  527.15   35.70
  12  -3  -1  500.05   33.80
  12  -3   1  471.45   33.80
  -3 -12   1  430.16   35.00
 -12   3   1  445.76   32.90
  -3 -12   1  491.05   35.10
  -5 -12  -1   46.20    9.20
 -12   5  -1   37.90    6.60
 -12   5   1   30.10    7.70
  12  -5   1   43.50    7.50
  -7 -12  -1  479.95   35.40
 -12   7  -1  395.36   33.50
  12  -7  -1  472.65   31.70
 -12   7  -1  411.66   30.30
 -12   7   1  378.26   31.30
  12  -9  -1   96.29   15.10
  -9 -12  -1   87.39   14.10
 -12   9  -1  106.59   11.90
 -12   9   1  123.89   13.10
 -12  11  -1   -0.80    5.80
  12 -11  -1   11.60    6.60
 -12  11   1   11.10    6.90
 -12  13  -1   -8.30    6.10
 -12  13   1   -8.20    6.80
 -10  13  -1   68.69   10.70
  13  10  -1   50.79    9.80
 -10  13   1   56.39    9.30
   8 -13  -1   19.30    6.80
  -8  13  -1   16.20    5.00
  13   8  -1   22.60    6.90
  13   6  -1   14.00    6.20
  -6  13  -1   17.70    4.40
   6 -13  -1   19.10    6.40
   6 -13   1   23.20    6.70
  13   4  -1   -2.60    5.10
   4 -13  -1   -4.40    4.90
  -4  13  -1   -3.90    4.40
  -4  13  -1    2.40    3.50
 -13  -4  -1   -2.10    4.50
 -13  -4   1   -2.10    6.40
   4 -13   1   -5.20    4.80
  13   4   1   -0.60    4.90
   2 -13  -1   -3.30    5.20
  -2  13  -1    0.10    4.40
  13   2  -1   -5.50    5.10
 -13  -2  -1   -1.40    3.70
   2 -13   1   -9.40    4.60
 -13  -2   1  -10.20    5.80
   0 -13  -1   80.39   12.90
 -13   0  -1   57.79    8.30
   0  13  -1   60.89   11.10
 -13   0  -1   75.69   10.00
  13   0  -1   73.79   11.70
 -13   0   1   57.39    8.80
 -13   2  -1  243.08   19.60
  -2 -13  -1  268.57   21.90
  13  -2  -1  258.27   19.80
 -13   2  -1  197.08   18.30
  -2 -13  -1  210.68   21.10
  13  -2   1  232.98   19.50
  -2 -13   1  209.18   20.80
 -13   2   1  233.38   19.30
 -13   4  -1   11.20    4.80
  -4 -13  -1   18.60    7.10
 -13   4  -1   26.40    6.20
  -4 -13  -1    4.40    5.90
  13  -4   1    9.00    5.70
  -4 -13   1   14.00    6.80
  13  -6  -1  278.67   23.60
  -6 -13  -1  317.27   27.50
  -6 -13   1  314.97   30.20
  13  -8  -1  242.78   20.40
 -13   8  -1  196.08   18.80
  -8 -13  -1  247.48   25.00
 -13   8   1  225.58   20.30
 -13  10  -1   -7.00    5.90
 -10 -13  -1   -1.80    8.20
  13 -10  -1    2.40    5.70
 -13  10   1    9.50    6.90
 -13  12  -1   58.89    9.30
 -13  12   1   50.89    9.90
 -13  14  -1    2.50    7.00
 -13  14   1    0.60    7.00
 -11  14  -1   26.70    7.40
 -11  14   1   13.60    7.30
   9 -14  -1  203.28   19.30
  -9  14  -1  168.48   15.50
  14   9  -1  152.48   22.80
  14   7  -1   20.20    7.20
   7 -14  -1   23.00    7.10
  -7  14  -1   19.70    5.30
  -5  14  -1   69.59    8.40
   5 -14  -1   84.49   14.00
   3 -14  -1  130.09   15.80
  14   3  -1  135.29   15.10
   3 -14   1  132.29   16.40
 -14  -3   1   99.29   14.10
  14   1  -1   40.10    7.10
  -1  14  -1   36.00    8.50
   1 -14  -1   41.50    7.50
 -14  -1  -1   40.70    7.40
   1 -14   1   37.20    7.40
 -14  -1   1   49.80    8.30
  14  -1  -1   12.90    5.60
 -14   1  -1   -1.10    5.40
  14  -1   1   10.40    5.80
  -1 -14   1   11.80    6.10
 -14   1   1   26.70    6.30
 -14   3  -1   15.10    5.60
  -3 -14  -1   13.40    7.10
  14  -3   1   11.20    8.50
 -14   3   1   14.10    6.40
  14  -5  -1   23.00    6.30
  -5 -14  -1   19.00    8.20
 -14   5  -1    1.70    6.30
 -14   5   1    4.20    6.90
  14  -7  -1  204.68   17.60
 -14   7  -1  148.79   16.30
 -14   7   1  157.98   17.80
 -14   9  -1   -1.30    6.30
  -9 -14  -1    6.10    8.10
 -14   9   1   13.70    7.10
 -14  11  -1   27.80    8.40
 -14  11   1   24.70    8.90
 -14  13  -1   31.70    9.10
 -14  13   1   45.90    9.80
 -14  15  -1   -5.10    7.70
 -14  15   1   -4.70    7.60
 -12  15  -1   -0.60    6.40
 -12  15   1   -3.80    6.30
 -10  15  -1   33.30    7.20
 -10  15   1   39.70    7.20
   8 -15  -1   46.00    9.30
  -8  15  -1   63.69    9.00
   6 -15  -1    6.40    7.00
  15   6  -1    6.50    7.30
 -15  -6   1    7.90    8.80
   4 -15  -1  175.78   18.90
  15   4  -1  194.18   18.60
 -15  -4   1  139.19   17.70
   2 -15  -1   -6.30    6.10
  15   2  -1    0.80    6.10
 -15  -2   1    6.10    6.90
   0 -15  -1   40.30    8.50
 -15   0  -1   44.00    7.40
 -15   0   1   50.79    8.20
  15  -2  -1    3.10    5.60
  -2 -15  -1   10.10    7.00
 -15   2  -1   15.10    5.50
 -15   2   1   18.70    6.90
  15  -4  -1   -9.90    5.40
 -15   4  -1   -9.40    5.20
  -4 -15  -1   -5.30    6.80
 -15   4   1    0.40    6.30
 -15   6  -1   -7.90    6.10
  15  -6  -1   -0.20    6.00
  -6 -15  -1    0.70    8.10
 -15   6   1   -9.40    6.70
  -8 -15  -1   -1.70    8.30
  15  -8  -1   -1.10    5.90
 -15   8  -1   -6.50    6.20
 -15   8   1   -1.90    6.90
 -15  10  -1  -16.70    6.70
 -15  10   1  -13.40    7.90
 -15  12  -1   35.40    9.50
 -15  12   1   39.40   10.60
 -15  14  -1   11.80    8.70
 -15  14   1    8.00    8.80
 -15  16  -1    1.80    8.90
 -15  16   1    4.50    8.80
 -13  16  -1   -0.90    7.60
 -13  16   1    1.70    7.70
 -11  16  -1   -0.40    6.20
 -11  16   1    8.80    6.30
  -9  16  -1    8.30    5.30
  -7  16  -1   -0.10    4.20
   5 -16  -1   29.20    7.90
  16   5  -1   20.80    9.70
   3 -16  -1   27.20    8.30
  16   3  -1   16.50    7.70
 -16  -3   1   37.20    9.30
 -16  -1  -1   -1.40    5.90
   1 -16  -1  -11.50    6.40
 -16  -1   1  -11.10    7.20
 -16   1  -1   86.79   11.30
  16  -1  -1   84.39   14.40
 -16   1   1   90.19   13.40
 -16   3  -1   22.70    6.50
  16  -3  -1   12.30    6.40
  -3 -16  -1   20.60    8.50
 -16   3   1   29.90    7.80
  -5 -16  -1    0.80    8.20
  16  -5  -1   -5.70    6.10
 -16   5  -1   -0.90    5.80
 -16   5   1    7.40    7.20
 -16   7  -1   14.40    7.00
 -16   7   1   18.40    8.30
 -16   9  -1    4.30    7.50
 -16   9   1   10.90    8.80
 -16  11  -1   20.90    9.10
 -16  11   1   24.50   10.50
 -16  13  -1   11.40    8.70
 -16  13   1   12.30    9.70
 -16  15  -1    4.10    9.10
 -16  15   1   -6.10    8.90
 -14  17  -1    4.10    8.40
 -12  17  -1   10.20    7.70
 -12  17   1   -8.00    7.30
 -10  17  -1   17.00    6.70
  -8  17  -1   -3.30    4.70
 -17  -4   1   -0.80    7.90
   2 -17  -1   -0.70    7.70
 -17  -2   1   -4.20    7.20
   0 -17  -1   29.20    8.60
 -17   0  -1   14.80    7.20
 -17   0   1   15.00    8.30
  -2 -17  -1   63.89   12.70
 -17   2  -1   44.50    8.30
 -17   2   1   57.19    9.70
 -17   4  -1   -5.40    5.70
 -17   4   1    1.70    7.80
 -17   6  -1   40.40    8.30
 -17   6   1   45.50   10.20
 -17   8  -1   16.50    8.00
 -17   8   1   23.30    9.40
 -17  10  -1   -4.20    7.80
 -17  10   1   -8.70    8.80
 -17  12  -1   -8.30    7.90
 -17  12   1    2.20    9.20
 -17  14  -1   -1.60    8.90
 -17  14   1   -9.50    9.20
 -13  18  -1   -8.20    7.70
 -11  18  -1   19.30    7.90
  -9  18  -1   18.30    6.70
 -18  -5   1   19.30    9.70
 -18  -3   1    8.90    8.00
 -18  -1  -1   -6.80    6.50
 -18  -1   1   -4.50    8.00
 -18   1  -1   26.20    7.70
 -18   1   1   12.80    9.00
 -18   3  -1    4.30    6.30
 -18   3   1    2.80    7.90
 -18   5  -1   18.10    7.50
 -18   5   1    2.30    9.40
 -18   7  -1   48.10    9.80
 -18   7   1   64.79   11.90
 -18   9  -1   -1.20    7.50
 -18   9   1   -0.20    9.20
 -18  11  -1   -2.40    8.20
 -18  11   1    8.90   10.60
 -18  13  -1    4.30    9.00
 -18  13   1   12.50   10.70
 -12  19  -1   17.20    8.20
 -19  -4   1   18.60   10.10
 -19  -2   1   16.10    9.10
 -19   0  -1    2.20    6.30
 -19   0   1    1.50    8.20
 -19   2  -1   16.70    7.20
 -19   2   1   12.40    8.90
 -19   4  -1   -7.10    6.40
 -19   4   1  -18.20    8.40
 -19   6  -1   20.60    8.60
 -19   6   1   31.60   11.00
 -19   8  -1    7.90    7.70
 -19   8   1    9.70    9.50
 -19  10  -1   19.90    9.10
 -19  10   1   22.10   11.30
 -19  12  -1   31.80   10.20
 -19  12   1   32.40   12.30
 -11  20  -1   16.50    7.40
 -20  -3   1   -1.50    9.20
 -20  -1  -1    6.00    6.70
 -20  -1   1   14.70    9.20
 -20   1  -1    8.50    6.40
 -20   1   1    2.90    7.90
 -20   3  -1    2.50    6.70
 -20   3   1   -5.90    7.60
 -20   5  -1    1.00    7.10
 -20   5   1    2.20    8.80
 -20   7  -1   -0.50    6.90
 -20   7   1   -3.40    9.20
 -20   9  -1   -6.80    7.90
 -20   9   1   -0.90   10.50
 -20  11  -1   29.80   10.20
 -20  11   1   40.70   13.20
  -8  21  -1   -3.40    7.20
 -21  -4   1   -6.50   10.10
 -21  -2  -1   14.90    8.30
 -21  -2   1    2.80    9.80
 -21   0  -1   27.30    8.30
 -21   0   1   43.50   10.80
 -21   2  -1   -1.60    6.20
 -21   2   1    2.70    8.30
 -21   4  -1    8.10    7.10
 -21   4   1   17.20    8.90
 -21   6  -1    3.70    6.90
 -21   6   1   -0.40    8.60
 -21   8  -1   -5.90    7.60
 -21   8   1   -0.90   10.30
 -22  -5   1    1.00   10.70
 -22  -3   1   -8.40   10.00
 -22  -1  -1   26.90    8.50
 -22  -1   1   18.10   10.80
 -22   1  -1   16.90    7.30
 -22   1   1   11.00    9.30
 -22   3  -1   18.00    7.50
 -22   3   1   -5.40    9.00
 -22   5  -1   13.30    7.70
 -22   5   1   22.80   10.60
 -22   7  -1    8.70    8.00
 -22   7   1    6.30    9.80
 -23  -2   1   12.90   10.30
 -23   0  -1   12.50    7.40
 -23   0   1    4.30    9.60
 -23   2  -1    5.20    6.80
 -23   2   1    6.20    9.40
   0   0   2   -5.50    2.60
  -1  -1   2 2813.32  172.58
   1  -1   2 2590.04  172.28
  -2   0   2   32.50    4.40
   0  -2   2   25.70    4.90
  -2   2  -2  148.59   10.30
  -2  -2   2  149.88   12.20
  -3  -1   2   14.20    3.80
  -3   1  -2   45.30    4.40
  -3   1   2   59.69    5.50
  -1  -3   2   49.20    6.40
  -3   3  -2  701.03   47.30
  -3  -3   2  771.32   48.70
  -2   4  -2    4.70    2.00
  -4  -2   2   -2.30    3.10
  -4   0   2 1307.17   84.89
   0  -4   2 1333.27   85.59
  -4   2  -2  439.36   28.40
  -4   2   2  445.16   28.80
  -2  -4   2  422.96   30.20
  -4   4  -2  104.09    8.10
  -4  -4   2  107.99   11.00
  -4   4   2  111.29    8.40
  -3   5  -2  943.61   64.49
  -5  -3   2 1066.39   65.69
  -1   5  -2 1094.09   72.39
  -5  -1   2 1163.48   73.09
  -5   1  -2  494.65   31.30
  -1  -5   2  465.85   33.20
  -5   1   2  487.25   32.00
  -5   3  -2   61.59    5.20
  -3  -5   2   53.29    7.50
  -5   5  -2   21.50    3.10
  -5   5   2   24.80    3.60
  -5  -5   2    9.60    5.80
  -4   6  -2  485.75   35.40
  -6  -4   2  606.34   37.20
  -2   6  -2   90.09    7.70
  -6  -2   2   97.69    8.90
  -6   0   2  162.38   12.30
  -6   2  -2   27.40    3.30
  -2  -6   2   23.70    5.60
  -6   2   2   22.30    3.90
  -6   4  -2   21.30    2.90
  -4  -6   2   16.10    5.70
  -6   4   2   19.70    3.70
  -6   6  -2   -1.10    2.10
  -6   6   2    3.80    2.90
  -6  -6   2   -1.80    5.50
  -5   7  -2   73.19    6.80
  -7  -5   2   65.39    9.10
  -3   7  -2   44.70    5.40
  -1   7  -2  129.39   10.00
  -7  -1   2  132.39   10.90
  -7   1   2    2.60    2.70
  -1  -7   2   -3.40    4.20
  -7   3  -2  584.04   37.60
  -3  -7   2  553.44   40.00
  -7   3   2  598.04   38.40
  -7   5  -2  368.46   25.00
  -7   5   2  395.86   25.80
  -5  -7   2  360.26   28.00
  -7   7  -2  235.28   15.30
  -7  -7   2  199.48   19.40
  -7   7   2  195.08   16.10
  -6   8  -2   16.10    3.60
  -8  -6   2   10.90    7.40
  -4   8  -2  379.16   24.70
  -8  -4   2  342.07   26.40
  -2   8  -2   48.10    6.20
  -8  -2   2   62.29    7.80
   0   8  -2  579.44   39.90
  -8   0  -2  619.34   39.50
  -8   0   2  630.84   40.60
  -8   2  -2  166.08   11.60
  -2  -8   2  136.79   15.40
  -8   2   2  174.68   12.80
  -8   4  -2   12.60    2.80
  -4  -8   2   -4.20    6.20
  -8   4   2   15.70    4.00
  -8   6  -2  257.97   17.20
  -6  -8   2  217.48   21.90
  -8   6   2  247.08   18.50
  -8   8   2   -0.30    6.00
  -8  -8   2  -24.30    9.60
  -7   9  -2  810.62   53.49
  -9  -7   2  803.22   56.29
  -7   9   2  839.12   54.19
  -5   9  -2   54.89    7.20
  -9  -5   2   62.39    9.50
  -3   9  -2 1560.84   99.49
  -9  -3   2 1535.25  100.59
  -1   9  -2  455.25   31.00
  -9  -1   2  473.55   31.90
  -9   1  -2    4.70    2.60
  -9   1   2    5.20    3.50
  -9   3  -2   -2.10    2.30
  -9   3   2    1.60    3.40
  -3  -9   2    4.30    6.40
  -9   5  -2   55.99    6.20
  -9   5   2   57.99    7.20
  -5  -9   2   27.30    9.80
  -9   7  -2   76.89    7.80
  -9   7   2   59.19    8.70
  -9   9  -2  313.27   21.10
  -9  -9   2  259.97   25.70
  -9   9   2  286.07   22.20
  -8  10  -2   14.00    4.10
  -6  10  -2   58.49    7.70
 -10  -6   2   49.60    9.50
  -4  10  -2    1.40    4.00
 -10  -4   2  -13.70    6.00
  -2  10  -2   19.20    4.20
 -10  -2   2    7.00    5.20
   0  10  -2  207.28   15.30
 -10   0   2  207.68   16.40
 -10   2  -2  148.49   11.10
 -10   2   2  137.89   12.60
 -10   4  -2    3.10    3.00
  -4 -10   2    3.40    7.60
 -10   4   2   10.50    4.60
 -10   6  -2  209.48   15.70
 -10   6   2  215.38   17.40
 -10   8  -2   36.80    5.40
 -10   8   2   22.60    6.70
 -10  10  -2   58.99    8.30
 -10  10   2   67.99    9.80
  -9  11  -2   13.70    4.50
  -7  11  -2  207.28   16.20
 -11  -7   2  235.98   20.70
  -5  11  -2   -7.30    3.40
 -11  -5   2    2.70    6.30
  -3  11  -2  798.42   52.99
 -11  -3   2  819.62   54.59
  -1  11  -2  172.18   13.80
 -11  -1   2  173.28   15.40
   1  11  -2  493.15   32.60
 -11   1  -2  490.05   32.40
 -11   1   2  464.65   33.80
 -11   3  -2  580.24   38.40
 -11   3   2  579.24   39.70
 -11   5  -2   34.20    5.10
 -11   5   2   35.10    7.20
 -11   7  -2  330.47   23.30
 -11   7   2  325.87   24.90
 -11   9  -2   26.60    5.30
 -11   9   2   29.50    6.80
 -11  11  -2    3.30    4.70
 -11  11   2   -0.80    6.00
  10 -12  -2   12.30    6.40
 -10  12  -2   19.00    5.40
  12  10  -2    7.20    7.20
  -8  12  -2   17.00    4.40
 -12  -8   2   11.90    9.00
  -6  12  -2   56.69    7.60
 -12  -6   2   63.99   10.10
  -4  12  -2   -6.70    3.50
 -12  -4   2   -0.30    6.10
  -2  12  -2  103.79    9.80
 -12  -2   2   94.49   12.10
 -12   2  -2   25.10    4.70
   2  12  -2   20.30    4.80
 -12   2   2   17.80    6.40
 -12   4  -2    9.60    5.40
 -12   4  -2    4.10    3.90
 -12   4   2   -2.40    5.50
 -12   6  -2   26.30    5.10
 -12   6   2    2.80    7.20
 -12   8  -2    3.80    4.40
 -12   8   2   13.10    6.20
 -12  10  -2  110.79   12.30
  12 -10  -2  142.29   16.10
 -12  10   2  111.79   14.00
 -12  12  -2   38.10    7.30
 -12  12   2   27.20    8.10
 -11  13  -2   23.90    6.40
  11 -13  -2   33.20    7.40
  13  11  -2   17.50    8.30
 -11  13   2    6.90    6.70
  -9  13  -2  125.09   12.20
  13   7  -2    3.70    6.20
  -7  13  -2    7.00    4.00
 -13  -7   2   -8.10    8.00
  -5  13  -2   49.10    7.50
 -13  -5   2   54.79   10.00
  -3  13  -2   -0.80    3.80
 -13  -3   2   -0.30    6.20
 -13  -1   2   -1.30    5.80
 -13   1  -2  225.68   17.70
 -13   1   2  247.48   19.70
 -13   3  -2  205.78   16.30
 -13   3   2  225.78   18.60
 -13   5  -2   40.40    6.00
 -13   5   2   26.30    8.30
 -13   7  -2  428.16   32.20
  13  -7  -2  528.45   33.80
 -13   7   2  433.36   34.10
 -13   9  -2   39.20    7.00
 -13   9   2   43.00    8.80
 -13  11  -2   35.90    7.40
 -13  11   2   23.20    8.30
 -13  13  -2   21.50    7.30
 -13  13   2   25.90    7.90
 -12  14  -2    4.20    6.20
 -12  14   2    1.20    6.20
 -10  14  -2    6.70    5.60
  14  10  -2    8.40    7.40
  10 -14  -2   11.10    6.30
   8 -14  -2    2.80    6.20
  -8  14  -2    1.00    4.50
 -14  -8   2    8.60    9.30
  -6  14  -2    4.80    4.20
 -14  -6   2   -2.90    8.60
  -4  14  -2   -2.10    4.00
   4 -14  -2    2.80    5.90
  14   4  -2    2.80    5.90
 -14  -4   2   -8.30    6.70
 -14  -2   2   53.19    9.30
   0 -14  -2  140.49   16.30
 -14   0   2  131.99   14.40
 -14   2  -2    1.50    4.20
 -14   2   2    4.80    5.90
 -14   4  -2   21.80    5.30
 -14   4   2    9.20    6.90
 -14   6  -2   22.60    5.80
  -6 -14  -2   28.90    9.00
 -14   6   2    4.30    8.10
 -14   8  -2   -3.50    5.20
  14  -8  -2    6.20    5.20
 -14   8   2   11.40    7.50
 -10 -14  -2   -2.00    8.40
  14 -10  -2    2.50    5.70
 -14  10   2   -8.90    7.50
 -14  12  -2    1.20    6.40
 -14  12   2   -1.00    7.70
 -14  14  -2    7.00    7.30
 -14  14   2    0.00    7.50
 -13  15  -2   -2.60    6.80
 -13  15   2   -5.20    6.80
 -11  15  -2    7.30    5.80
  -9  15  -2   67.29    9.60
  15   9  -2   51.09    9.90
  -7  15  -2    8.40    4.60
  15   7  -2    5.30    7.20
   7 -15  -2    4.00    6.60
 -15  -7   2   11.00    9.40
  -5  15  -2   71.49    9.00
 -15  -5   2   69.79   12.00
  -3  15  -2  159.88   13.00
 -15  -3   2  140.49   17.10
  15   1  -2   -8.90    5.60
 -15  -1   2   -2.00    6.80
 -15   1  -2   50.29    7.10
  15  -1  -2   42.90    7.80
 -15   1   2   56.99    9.20
 -15   3  -2    6.50    4.70
  -3 -15  -2   -1.20    6.90
 -15   3   2   11.10    6.90
 -15   5  -2  -10.60    4.50
  -5 -15  -2   -4.30    7.20
 -15   5   2    2.20    6.90
 -15   7  -2   -9.80    5.10
  -7 -15  -2    0.80    8.20
 -15   7   2    5.00    7.10
  15  -9  -2   -6.00    5.40
 -15   9  -2  -13.80    5.40
  -9 -15  -2   -5.40    8.30
 -15   9   2   -7.90    7.70
 -15  11  -2   55.59    9.20
 -15  11   2   48.80   10.90
 -15  13  -2   33.20    8.60
 -15  13   2   28.90    9.50
 -15  15  -2   -8.10    7.50
 -15  15   2   -6.90    7.80
 -14  16  -2    0.80    7.80
 -12  16  -2   18.40    7.50
 -10  16  -2    2.30    5.50
  16   8  -2   -3.60    9.50
   8 -16  -2    1.60    6.50
  -8  16  -2   -2.50    4.70
  16   6  -2    1.30    7.10
  -6  16  -2    4.20    4.40
 -16  -6   2    8.80    9.20
  -4  16  -2   -4.10    4.00
 -16  -4   2   -7.70    8.10
 -16  -2   2   -3.70    7.70
 -16   0  -2    4.00    4.90
  16   0  -2   -3.60    6.00
 -16   0   2   -5.20    7.50
 -16   2  -2   -1.40    4.70
  16  -2  -2    2.50    5.80
 -16   2   2    2.30    7.00
  -4 -16  -2    9.90    8.40
 -16   4  -2   15.60    5.60
 -16   4   2   17.40    7.90
  16  -6  -2   -9.40    5.70
 -16   6  -2   -1.60    5.20
 -16   6   2    3.10    7.70
  -8 -16  -2    5.50   10.00
 -16   8  -2   12.10    6.60
  16  -8  -2    8.20    6.70
 -16   8   2   12.20    8.90
 -16  10  -2   24.50    7.90
 -16  10   2   13.00    9.90
 -16  12  -2   -2.30    7.10
 -16  12   2    1.10    8.80
 -16  14  -2    2.30    7.90
 -16  14   2   -4.50    8.60
 -16  16  -2    3.40    8.70
 -16  16   2   -7.60    8.40
 -15  17  -2   27.70    9.50
 -13  17  -2   -1.10    7.80
 -11  17  -2   18.20    7.20
  -9  17  -2    4.10    5.70
  -7  17  -2   -4.00    4.50
 -17  -7   2   -9.50    9.40
  -5  17  -2   -5.70    4.10
 -17  -5   2   -0.50    9.10
 -17  -3   2    0.70    8.80
 -17  -1   2   -6.10    8.30
 -17   1  -2  101.69   11.80
 -17   1   2  117.19   16.00
 -17   3  -2   23.40    6.20
  -3 -17  -2   30.40    9.20
 -17   3   2   22.60    9.30
  -5 -17  -2   38.90   10.80
  17  -5  -2   24.40    7.60
 -17   5  -2   35.90    7.00
 -17   5   2   50.29   10.90
 -17   7  -2   88.39   12.50
 -17   7   2  108.09   16.80
 -17   9  -2   -2.00    6.80
 -17   9   2   -1.90    9.20
 -17  11  -2   -3.30    7.20
 -17  11   2    2.50    9.30
 -17  13  -2    0.10    7.70
 -17  13   2   -4.40    9.10
 -17  15  -2    3.30    8.70
 -17  15   2   -5.40    8.70
 -14  18  -2   -0.60    8.10
 -12  18  -2   10.50    7.90
 -10  18  -2    7.40    6.60
  -8  18  -2    6.10    5.60
  -6  18  -2   13.60    5.10
 -18  -6   2   15.50   11.00
   4 -18  -2    0.80   10.60
 -18  -4   2    3.80    9.70
 -18  -2   2   53.29   11.70
 -18   0  -2   12.80    6.10
 -18   0   2    0.90    8.80
  -2 -18  -2    7.50    8.30
 -18   2  -2   11.30    5.50
 -18   2   2    7.30    8.80
 -18   4  -2    9.80    5.80
 -18   4   2   -2.80    9.20
 -18   6  -2    4.60    6.20
 -18   6   2    1.20    9.80
 -18   8  -2   -0.60    6.50
 -18   8   2   12.40    9.90
 -18  10  -2    1.20    7.00
 -18  10   2    5.20    9.90
 -18  12  -2    2.00    7.70
 -18  12   2    9.30   10.40
 -18  14  -2    2.50    8.50
 -18  14   2   -2.00    9.70
 -11  19  -2   35.20    8.60
  -9  19  -2   22.80    7.00
  -7  19  -2    4.50    5.50
 -19  -7   2  -18.90   11.10
 -19  -5   2   41.60   12.50
 -19  -3   2   12.00    9.80
 -19  -1   2   16.90    9.40
 -19   1  -2    1.40    5.60
 -19   1   2    5.90    9.20
 -19   3  -2    4.70    5.70
 -19   3   2  -10.50    9.00
 -19   5  -2    1.10    6.20
 -19   5   2    8.90   10.10
 -19   7  -2   14.90    7.20
 -19   7   2   22.50   10.50
 -19   9  -2    6.50    7.00
 -19   9   2   -7.10   10.30
 -19  11  -2   40.70    9.50
 -19  11   2   37.60   13.10
 -10  20  -2    7.10    6.70
  -8  20  -2   -2.90    5.60
 -20  -8   2   -5.20   12.40
 -20  -6   2    3.90   11.40
 -20  -4   2   -5.90   10.70
 -20  -2   2   14.60   10.60
 -20   0  -2    7.90    5.90
 -20   0   2   10.40    9.70
 -20   2  -2    4.50    5.60
 -20   2   2    8.20    9.20
 -20   4  -2    7.80    6.10
 -20   4   2   10.00    9.60
 -20   6  -2    2.00    6.20
 -20   6   2   -8.90    8.80
 -20   8  -2   10.90    7.00
 -20   8   2    1.40   10.60
 -20  10  -2   19.00    8.50
 -20  10   2   -4.30   11.90
 -21  -3   2  -14.20   10.80
 -21  -1   2   19.60   11.60
 -21   1  -2   15.50    6.90
 -21   1   2   31.80   10.50
 -21   3  -2    8.60    6.00
 -21   3   2    3.10    9.30
 -21   5  -2   12.80    6.50
 -21   5   2    8.30   10.40
 -21   7  -2    4.70    6.60
 -21   7   2   -0.40   10.50
 -21   9  -2    2.00    7.20
 -21   9   2    9.80   11.80
 -22  -6   2   -5.20   11.20
 -22  -4   2   -9.20   10.90
 -22  -2   2   -5.40   10.80
 -22   0  -2    6.70    6.50
 -22   0   2   25.20   11.70
 -22   2  -2    8.40    6.30
 -22   2   2    7.60   10.50
 -22   4  -2   11.30    6.60
 -22   4   2    6.50   10.50
 -22   6  -2    0.30    6.70
 -22   6   2   17.40   11.50
   0  -1   3 1158.68   76.29
  -1   0   3 1182.68   76.19
   1  -2   3  376.16   27.20
  -2  -1   3  395.36   27.30
  -2   1   3  256.97   17.90
  -1  -2   3  221.78   18.40
  -2   3  -3   24.70    3.50
  -3  -2   3   21.50    5.90
  -3   0   3  275.87   19.90
   0  -3   3  262.37   20.40
  -3   2  -3  368.16   23.50
  -2  -3   3  348.07   25.80
  -3   2   3  343.27   24.30
  -3   4  -3  328.77   20.80
  -4  -3   3  276.87   23.20
  -4  -1   3   54.49    8.70
  -1  -4   3   64.99    9.10
  -4   1   3   80.59    8.10
  -4   3  -3  115.89    8.50
  -3  -4   3   95.39   12.30
  -4   5  -3   23.10    3.70
  -5  -4   3   22.00    6.50
  -2   5  -3  667.43   41.50
  -5  -2   3  596.34   42.90
  -5   0   3 1240.08   84.19
   0  -5   3 1360.46   85.39
  -5   2  -3  190.38   12.90
  -5   2   3  186.48   14.10
  -2  -5   3  173.58   16.30
  -5   4  -3  159.68   11.30
  -4  -5   3  145.09   15.10
  -5   6  -3  190.78   13.10
  -6  -5   3  148.19   17.30
  -3   6  -3    1.50    2.70
  -6  -3   3    0.20    4.60
  -1   6  -3  173.28   12.70
  -6  -1   3  161.58   13.80
  -6   1  -3   -1.70    1.90
  -1  -6   3    2.50    4.60
  -6   1   3    1.90    3.50
  -6   3  -3  130.39    9.20
  -3  -6   3   92.79   13.40
  -6   3   3  120.29   10.40
  -6   5  -3   64.29    6.40
  -6   5   3   75.49    7.60
  -5  -6   3   40.90    9.90
  -6   7  -3  101.29    8.90
  -7  -6   3  102.79   13.00
  -4   7  -3  196.28   14.00
  -7  -4   3  167.68   17.40
  -2   7  -3    5.60    3.20
  -7  -2   3    6.30    4.50
  -7   0   3   89.79    9.30
  -7   2  -3  188.98   12.30
  -7   2   3  171.68   13.90
  -2  -7   3  152.88   16.70
  -7   4  -3  126.79    9.80
  -4  -7   3  104.69   15.10
  -7   4   3  145.89   11.40
  -7   6  -3   12.20    3.10
  -6  -7   3    1.20    7.40
  -7   6   3   15.90    4.90
  -7   8  -3  278.27   19.40
  -8  -7   3  267.87   24.90
  -5   8  -3   65.99    7.40
  -8  -5   3   55.99   10.00
  -3   8  -3  569.44   38.10
  -8  -3   3  577.34   39.90
  -1   8  -3    0.70    3.60
  -8  -1   3    6.90    4.30
  -8   1  -3  194.38   13.00
  -8   1   3  177.98   14.90
  -8   3  -3    4.50    2.30
  -8   3   3    6.60    4.00
  -3  -8   3   -1.00    6.20
  -8   5  -3  152.08   11.00
  -5  -8   3  111.39   17.10
  -8   5   3  151.48   12.70
  -8   7  -3   11.50    3.40
  -8   9  -3  112.39    9.70
  -9  -8   3   82.09   14.10
  -6   9  -3   73.19    7.80
  -9  -6   3   58.59   11.00
  -4   9  -3   19.30    4.30
  -9  -4   3   -1.00    7.30
  -2   9  -3  353.86   24.70
  -9  -2   3  353.26   26.10
   0   9  -3  459.85   30.20
  -9   0   3  420.56   30.90
  -9   2  -3   50.89    5.50
  -2  -9   3   54.19   10.20
  -9   2   3   61.09    8.20
  -9   4  -3   17.10    3.30
  -4  -9   3    8.70    8.50
  -9   4   3   19.10    5.50
  -9   6  -3   86.89    7.60
  -6  -9   3   56.89   12.40
  -9   6   3   78.89   10.10
  -9   8  -3  121.89   10.10
  -8  -9   3  102.89   15.80
  -9   8   3  110.99   12.30
  -9  10  -3   11.10    3.80
 -10  -9   3    9.90    9.10
  -7  10  -3  180.38   14.30
 -10  -7   3  193.78   19.90
  -5  10  -3   -3.50    3.60
 -10  -5   3  -11.20    6.60
  -3  10  -3  503.55   33.70
 -10  -3   3  488.45   35.50
  -1  10  -3   -1.80    4.40
 -10   1  -3  443.16   27.90
   1  10  -3  414.76   29.30
 -10   1   3  396.16   29.80
 -10   3  -3  120.19    9.40
 -10   3   3  118.89   12.00
  -3 -10   3  113.09   17.40
 -10   5  -3  156.78   11.10
 -10   5   3  129.69   13.50
  -5 -10   3  118.99   16.60
 -10   7  -3  193.18   14.20
 -10   7   3  200.78   16.50
  -7 -10   3  144.69   22.30
 -10   9  -3   26.00    4.80
  -9 -10   3   31.00   11.20
 -10   9   3   30.80    6.80
 -10  11  -3   50.69    7.70
 -11 -10   3   38.50   12.50
  -8  11  -3   -0.50    3.40
 -11  -8   3   -0.20    8.90
  -6  11  -3   19.50    4.40
 -11  -6   3   26.10    8.60
  -4  11  -3   47.50    6.30
 -11  -4   3   51.89    8.90
  -2  11  -3   22.50    4.80
 -11  -2   3   13.90    6.30
   0  11  -3   -4.10    4.00
 -11   0   3   -6.20    5.10
 -11   2  -3   21.40    3.80
 -11   2   3   19.10    6.30
 -11   4  -3   65.79    7.00
 -11   4   3   56.39    9.00
 -11   6  -3    6.60    3.50
 -11   6   3    0.00    5.80
  -6 -11   3  -21.20    9.80
 -11   8  -3   45.10    6.90
 -11   8   3   30.70    7.60
  -8 -11   3   21.90   11.90
 -11  10  -3   74.99    8.80
 -11  10   3   50.39    9.10
 -10 -11   3   55.89   13.70
 -11  12  -3   61.09    9.10
 -12 -11   3   46.10   13.50
 -11  12   3   31.00    7.80
  -9  12  -3   10.90    4.40
 -12  -9   3   13.90   10.50
  -7  12  -3   22.40    4.80
 -12  -7   3   20.80    9.50
  -5  12  -3   40.00    5.90
 -12  -5   3   57.09    9.70
  -3  12  -3   28.30    5.40
 -12  -3   3   39.00    8.00
 -12  -1   3   34.30    7.80
   1  12  -3   96.49    9.80
 -12   1   3   77.99   11.00
 -12   3  -3   88.49    8.20
 -12   3   3   84.09   11.40
 -12   5  -3   17.50    4.20
  -5 -12   3   -0.50   10.50
 -12   5   3   12.40    6.90
 -12   7  -3  126.99   11.00
  -7 -12   3  110.19   17.10
 -12   7   3  117.09   13.80
 -12   9  -3    7.80    4.50
 -12   9   3   -6.80    6.70
  -9 -12   3  -18.30   11.70
 -12  11  -3   68.99    9.90
 -12  13  -3   -2.20    5.20
 -13 -12   3    9.30   12.10
 -10  13  -3   15.00    5.30
 -13 -10   3   12.50   11.30
  -8  13  -3   28.60    5.50
 -13  -8   3   33.10   11.30
  -6  13  -3    1.60    4.10
 -13  -6   3   -0.80    8.50
  -4  13  -3   -5.00    4.10
 -13  -4   3   -5.70    6.70
  -2  13  -3   46.20    6.80
 -13  -2   3   47.40    9.00
   0  13  -3  135.19   12.20
 -13   0   3  129.29   14.20
   2  13  -3   39.20    6.40
 -13   2  -3   39.20    6.20
 -13   2   3   38.70    8.00
 -13   4  -3   -5.70    3.10
 -13   6  -3   65.49    7.90
 -13   6   3   45.20    9.50
 -13   8  -3   81.89    9.70
 -13   8   3   82.19   13.00
 -13  10  -3    8.50    5.50
 -13  10   3   10.90    7.80
 -13  12  -3    5.90    5.60
 -13  12   3    1.60    6.90
 -13  14  -3    6.90    6.30
 -11  14  -3    3.10    5.50
  -9  14  -3   27.30    5.60
 -14  -9   3   13.30   11.10
  -7  14  -3    0.10    4.40
 -14  -7   3    8.60    9.70
  -5  14  -3   39.30    6.20
 -14  -5   3   35.70   10.20
  -3  14  -3    8.20    4.90
 -14  -3   3    4.70    7.20
  -1  14  -3   62.39    8.90
 -14  -1   3   50.49    9.90
 -14   1  -3   12.10    4.20
   1  14  -3   11.40    4.90
 -14   3  -3   22.60    4.60
   3  14  -3   16.30    5.20
 -14   3   3   16.20    7.40
 -14   5  -3    8.30    4.20
 -14   5   3   16.20    7.20
 -14   7  -3   12.40    4.70
 -14   7   3   10.40    7.40
 -14   9  -3   -1.50    4.90
 -14   9   3    5.60    7.60
 -14  11  -3   20.90    6.40
 -14  11   3   21.90    8.60
 -14  13  -3   18.80    6.80
 -14  13   3    2.70    7.40
 -14  15  -3   -3.60    6.70
 -14  15   3   -8.60    6.70
 -12  15  -3   12.30    6.50
 -10  15  -3   22.30    6.00
  -8  15  -3    0.20    4.60
  15   8  -3    0.40    8.10
 -15  -8   3    0.50   10.60
  -6  15  -3   -0.40    4.40
 -15  -6   3    7.50    9.30
  -4  15  -3   31.40    6.00
 -15  -4   3   24.00    9.70
  -2  15  -3   32.30    6.00
 -15  -2   3   25.80    9.10
   0  15  -3   14.90    5.10
 -15   0   3   -1.00    7.20
   2  15  -3    8.20    5.00
 -15   2  -3    9.30    4.40
 -15   2   3    9.20    6.90
 -15   4  -3   38.00    6.20
 -15   4   3   55.59    9.70
 -15   6  -3    4.50    4.60
 -15   6   3   19.50    7.90
 -15   8  -3   -2.10    5.00
 -15   8   3   10.00    8.40
 -15  10  -3   25.60    6.80
 -15  10   3   26.80   10.10
 -15  12  -3   28.60    7.40
 -15  12   3   17.10    9.30
 -15  14  -3   -9.70    6.50
 -15  14   3   -3.10    7.40
 -15  16  -3    4.20    7.60
 -13  16  -3    0.10    7.00
 -11  16  -3    9.60    6.30
  -9  16  -3    0.40    5.10
 -16  -9   3  -10.80   10.90
  -7  16  -3    3.50    4.70
 -16  -7   3    3.00   10.20
  -5  16  -3   -4.20    4.60
 -16  -5   3   -6.30    8.90
  -3  16  -3   10.60    5.00
 -16  -3   3   -1.00    8.60
  -1  16  -3    5.20    5.00
 -16  -1   3   -3.90    7.90
 -16   1   3   41.10   10.10
 -16   3  -3   -1.00    4.30
 -16   3   3   -4.80    7.50
 -16   5  -3   13.50    5.00
 -16   5   3   14.90    8.70
 -16   7  -3    8.90    5.30
 -16   7   3   -0.90    8.20
 -16   9  -3    5.10    5.90
 -16   9   3   -7.40    8.80
 -16  11  -3   -2.20    6.20
 -16  11   3    5.00    9.00
 -16  13  -3   -2.30    6.40
 -16  13   3   -1.40    8.20
 -16  15  -3    2.90    7.30
 -14  17  -3    2.20    7.70
 -12  17  -3    6.80    7.10
 -10  17  -3   -4.20    6.00
  -8  17  -3    7.40    5.40
 -17  -8   3    0.40   11.80
  -6  17  -3    6.50    5.10
 -17  -6   3    3.60   10.50
  -4  17  -3   -8.80    4.70
 -17  -4   3   -9.00    9.70
  -2  17  -3   15.70    5.90
 -17  -2   3   14.20   10.00
 -17   0   3   50.49   11.40
 -17   2   3   -1.20    8.40
 -17   4  -3   -0.40    4.50
 -17   4   3   -8.40    8.50
 -17   6  -3   19.90    6.00
 -17   6   3   18.40    9.90
 -17   8  -3   21.10    6.60
 -17   8   3   22.00   10.10
 -17  10  -3    5.10    6.30
 -17  10   3   10.30    9.40
 -17  12  -3    2.00    6.70
 -17  12   3    4.90    9.30
 -17  14  -3   -1.20    7.10
 -17  14   3    4.50    9.10
 -13  18  -3   -2.10    7.30
 -11  18  -3   23.80    7.80
  -9  18  -3   -3.60    5.70
  -7  18  -3   11.60    5.70
 -18  -7   3   10.80   12.20
  -5  18  -3    6.90    5.50
 -18  -5   3    3.20   11.20
  -3  18  -3   -0.10    5.30
 -18  -3   3   11.30   10.00
 -18  -1   3   16.90   10.10
 -18   1   3    0.70    9.50
 -18   3  -3   14.60    5.20
 -18   3   3   -1.20    9.50
 -18   5  -3    6.30    5.30
 -18   5   3   -3.50    9.60
 -18   7  -3   12.90    6.20
 -18   7   3   19.60   10.40
 -18   9  -3    0.30    6.20
 -18   9   3    6.20    9.80
 -18  11  -3   18.30    7.40
 -18  11   3   20.70   10.40
 -18  13  -3   -1.00    7.10
 -18  13   3   11.80    9.80
 -10  19  -3    9.20    6.70
  -8  19  -3    0.10    5.90
 -19  -8   3    0.00   12.80
  -6  19  -3    5.20    5.40
 -19  -6   3   -9.90   11.60
  -4  19  -3   15.70    5.90
 -19  -4   3   11.40   11.30
 -19  -2   3   18.70   11.10
 -19   0   3    3.90    9.80
 -19   2  -3    7.10    5.20
 -19   2   3    9.10    9.80
 -19   4  -3   11.20    5.60
 -19   4   3    0.50    9.90
 -19   6  -3   -1.50    5.40
 -19   6   3    9.90   10.40
 -19   8  -3    5.20    6.30
 -19   8   3   -4.00   10.20
 -19  10  -3    5.60    6.80
 -19  10   3    9.60   11.40
  -9  20  -3    3.80    6.20
 -20  -9   3    9.20   14.20
  -7  20  -3    4.80    5.80
 -20  -7   3   -3.50   12.60
  -5  20  -3    5.20    5.40
 -20  -5   3   15.10   12.80
 -20  -3   3   -9.90   11.20
 -20  -1   3   16.10   11.30
 -20   1   3   -2.30   10.00
 -20   3  -3    8.90    5.80
 -20   3   3   16.00   10.30
 -20   5  -3    4.10    5.70
 -20   5   3   -4.50    9.50
 -20   7  -3    6.80    6.10
 -20   7   3    2.60   11.10
 -20   9  -3    0.80    6.30
 -20   9   3   -0.70   11.40
 -21  -6   3   -2.60   12.40
 -21  -4   3   -4.10   12.50
 -21  -2   3  -10.10   11.30
 -21   0   3   11.40   11.10
 -21   2  -3    5.90    5.60
 -21   2   3    2.40   10.80
 -21   4  -3    1.90    5.60
 -21   4   3    5.70   10.70
 -21   6  -3    3.80    5.80
 -21   6   3    3.60   11.30
 -22  -3   3   -0.90   11.70
 -22  -1   3    5.20   11.60
 -22   1  -3    8.20    6.00
 -22   1   3    7.10   11.80
 -22   3  -3    8.10    6.00
 -22   3   3    0.10   10.80
   0   0   4  402.46   29.10
   1  -1   4   61.59    9.30
  -1  -1   4   73.89    9.70
  -2   0   4   72.29   10.40
  -2  -2   4    5.20    5.50
  -3  -1   4   14.30    6.10
   1  -3   4   -1.20    6.60
  -3   1  -4  943.41   57.59
  -3   1   4  878.01   59.29
  -1  -3   4  838.12   59.89
  -3   3  -4  314.47   20.60
  -3  -3   4  270.47   24.00
  -2   4  -4  187.78   14.10
  -4  -2   4  184.28   17.50
   0  -4   4  103.59   15.30
  -4   0   4  168.68   14.40
  -4   2  -4   19.00    3.70
  -2  -4   4    1.80    6.80
  -4   2   4   36.60    6.20
  -4   4  -4    9.30    3.40
  -3   5  -4  146.79   11.50
  -5  -3   4  125.59   15.90
  -5  -1   4   81.59   11.50
  -1  -5   4  101.09   14.30
  -5   1   4  125.69   12.40
  -5   3  -4   63.29    6.70
  -3  -5   4   60.59   10.60
  -5   3   4   64.89    9.10
  -5   5  -4   45.50    6.10
  -5  -5   4   32.30    9.00
  -4   6  -4    2.90    3.40
  -6  -4   4  -12.10    6.90
  -2   6  -4  132.69   11.10
  -6  -2   4  121.09   14.70
  -6   0   4   18.50    6.10
  -6   2  -4   61.99    6.10
  -6   2   4   63.99    8.50
  -2  -6   4   40.00    9.30
  -6   4  -4  157.98   11.50
  -6   4   4  156.58   13.60
  -4  -6   4  116.79   17.00
  -6   6  -4    4.00    3.20
  -6  -6   4  -16.50    7.20
  -5   7  -4  182.18   13.80
  -7  -5   4  162.58   19.10
  -3   7  -4  288.27   19.60
  -7  -3   4  243.18   22.70
  -1   7  -4   27.40    5.60
  -7  -1   4   27.90    7.70
  -7   1   4  273.27   22.20
  -1  -7   4  315.87   25.00
  -7   3  -4   25.10    3.60
  -7   3   4   18.80    5.50
  -3  -7   4    9.40    8.20
  -7   5  -4   45.40    5.90
  -5  -7   4   36.00   10.00
  -7  -7   4    0.70    8.70
  -6   8  -4  113.09   10.00
  -8  -6   4  104.69   14.50
  -4   8  -4   19.00    4.30
  -8  -4   4   22.10    8.50
  -2   8  -4  115.29   10.60
  -8  -2   4  102.79   13.70
  -8   0   4   23.50    7.20
  -2  -8   4    9.20    7.70
  -8   2   4    4.90    4.90
  -8   4  -4    6.10    2.80
  -8   4   4    3.70    5.40
  -4  -8   4   -6.70    7.60
  -8   6  -4    4.80    2.90
  -6  -8   4   -0.70    8.60
  -8   6   4   -1.00    5.10
  -8   8  -4   89.29    8.50
  -8  -8   4   74.79   13.50
  -7   9  -4    0.90    3.10
  -9  -7   4   -2.70    7.80
  -5   9  -4   13.20    4.00
  -9  -5   4    6.90    8.20
  -3   9  -4    9.00    4.30
  -9  -3   4    7.80    7.30
  -1   9  -4  102.39   10.60
  -9  -1   4   98.69   12.40
  -9   1   4  385.56   28.40
  -9   3  -4   40.00    5.10
  -9   3   4   36.40    7.60
  -3  -9   4   37.60   10.70
  -9   5  -4  191.38   13.70
  -5  -9   4  216.68   22.10
  -9   5   4  164.58   16.30
  -9   7  -4  182.98   13.50
  -7  -9   4  152.78   21.60
  -9   9  -4    2.70    3.30
  -9  -9   4    2.70   10.00
  -8  10  -4   26.60    4.80
 -10  -8   4   60.39   12.10
  -6  10  -4    4.00    3.70
 -10  -6   4    5.20    8.60
  -4  10  -4   78.79    9.00
 -10  -4   4   78.89   11.50
  -2  10  -4   99.49   10.10
 -10  -2   4   81.79   12.30
   0  10  -4    2.30    4.80
 -10   0   4    7.80    6.00
 -10   2  -4   52.59    5.60
 -10   2   4   47.20    8.70
 -10   4   4   -3.60    5.70
 -10   6   4   23.20    6.60
  -6 -10   4   -1.80   10.40
 -10   8  -4    2.70    3.10
  -8 -10   4   -2.20   10.00
 -10   8   4    1.40    5.70
 -10  10  -4    9.60    4.00
 -10 -10   4   13.20   11.60
  -9  11  -4   12.30    4.20
 -11  -9   4   13.10   11.10
  -7  11  -4   34.00    5.30
 -11  -7   4   36.70   10.80
  -5  11  -4   40.00    5.80
 -11  -5   4   43.20   10.00
  -3  11  -4   -3.40    3.70
 -11  -3   4   -8.80    6.40
  -1  11  -4   11.60    4.60
 -11  -1   4    7.30    6.30
   1  11  -4   13.80    5.20
 -11   1   4   23.30    6.70
 -11   3  -4    1.60    2.70
 -11   3   4   -1.50    5.80
 -11   5  -4   39.80    5.90
  -5 -11   4   21.60   12.10
 -11   5   4   51.29    9.00
 -11   7  -4   22.60    4.40
 -11   7   4   34.30    8.00
  -7 -11   4   25.60   12.30
 -11   9  -4   47.70    6.90
 -11   9   4   28.00    8.10
  -9 -11   4   36.80   13.70
 -11  11  -4  119.19   11.40
 -11 -11   4  109.19   18.20
 -10  12  -4   19.60    5.30
 -12 -10   4   35.90   13.10
  -8  12  -4    9.10    4.40
 -12  -8   4    0.10   10.00
  -6  12  -4    3.70    3.80
 -12  -6   4   -5.20    9.00
  -4  12  -4   -1.40    4.00
 -12  -4   4   -2.70    7.30
  -2  12  -4   17.00    4.70
 -12  -2   4   -5.70    6.20
   0  12  -4   19.20    5.30
 -12   0   4   22.90    7.40
   2  12  -4   42.60    7.10
 -12   2   4   38.80    8.80
 -12   4  -4    6.00    3.20
 -12   4   4   -1.20    6.50
 -12   6  -4   18.00    4.30
  -6 -12   4    1.00   12.40
 -12   6   4    9.70    7.00
 -12   8  -4   39.50    5.60
 -12   8   4   29.70    8.60
  -8 -12   4   17.80   14.40
 -12  10  -4   12.20    4.90
 -10 -12   4  -20.00   13.20
 -12  10   4   10.60    7.20
 -12  12  -4    1.60    5.00
 -12 -12   4    9.10   13.80
 -11  13  -4    4.40    5.10
 -13 -11   4   12.40   12.60
  -9  13  -4   -1.30    4.30
 -13  -9   4   -4.70   10.60
  -7  13  -4   37.90    6.20
 -13  -7   4   50.59   12.30
  -5  13  -4   16.30    5.40
 -13  -5   4   10.60    9.50
  -3  13  -4   15.40    5.70
 -13  -3   4    8.70    8.20
  -1  13  -4  131.29   12.60
 -13  -1   4  118.29   14.70
   1  13  -4   30.10    6.20
 -13   1   4   27.40    7.70
 -13   3  -4    4.20    3.30
   3  13  -4    4.70    5.30
 -13   3   4    5.00    6.90
 -13   5  -4    6.80    3.80
 -13   5   4   10.80    7.40
 -13   7  -4    7.30    4.10
  -7 -13   4  -23.30   12.90
 -13   7   4   -3.80    6.60
 -13   9  -4    0.40    4.40
 -13   9   4    8.40    7.00
  -9 -13   4  -18.20   13.40
 -13  11  -4   12.10    5.60
 -11 -13   4    5.60   14.10
 -13  11   4   21.00    7.60
 -13  13  -4    1.20    5.40
 -13 -13   4    2.10   14.60
 -12  14  -4    1.90    5.50
 -14 -12   4   -3.70   13.60
 -10  14  -4   15.00    5.30
 -14 -10   4   36.50   13.80
  -8  14  -4    9.80    5.10
 -14  -8   4    9.90   11.20
  -6  14  -4   -2.70    4.60
 -14  -6   4   19.30   10.60
  -4  14  -4   18.10    5.80
 -14  -4   4   22.50    9.50
  -2  14  -4    5.90    5.20
 -14  -2   4    1.40    7.30
   0  14  -4    2.40    5.00
 -14   0   4   11.90    7.30
   2  14  -4    1.80    5.00
 -14   2  -4    1.00    3.30
 -14   2   4    1.10    6.90
   4  14  -4    2.70    4.90
 -14   4  -4   -1.80    3.40
 -14   4   4    2.20    7.00
 -14   6  -4    7.60    4.20
 -14   6   4    7.10    7.60
 -14   8  -4    3.50    4.40
  -8 -14   4   -7.20   13.90
 -14   8   4    8.60    7.70
 -14  10  -4    3.50    5.40
 -14  10   4    7.70    7.80
 -10 -14   4  -13.10   13.70
 -14  12  -4   17.80    6.10
 -14  14  -4   -4.60    5.80
 -14 -14   4  -19.50   14.40
 -13  15  -4   12.70    6.70
 -11  15  -4   16.00    6.20
 -15 -11   4   21.10   14.00
 -15  -9   4   47.30   14.30
  -7  15  -4   -3.70    4.60
 -15  -7   4    2.30   11.00
  -5  15  -4   -1.10    4.90
 -15  -5   4  -17.90    9.00
  -3  15  -4   10.40    5.60
 -15  -3   4    1.20    8.60
  -1  15  -4   17.00    5.90
 -15  -1   4   17.60    8.90
   1  15  -4    1.30    5.20
 -15   1   4   -0.20    7.30
 -15   3  -4    9.50    4.20
   3  15  -4   11.20    5.70
 -15   3   4   11.50    8.10
 -15   5  -4   22.20    5.00
   5  15  -4   12.50    6.20
 -15   5   4   21.70    8.70
 -15   7  -4   -0.50    4.10
 -15   7   4   -3.20    7.80
 -15   9  -4    7.10    5.40
  -9 -15   4    3.20   15.10
 -15   9   4   19.10    9.10
 -15  11  -4   11.50    6.10
 -11 -15   4  -19.00   14.30
 -15  11   4   10.00    8.60
 -15  13  -4    0.40    5.90
 -15  13   4   -1.80    7.10
 -15  15  -4   -1.90    6.60
 -14  16  -4    2.40    7.00
 -12  16  -4   -1.30    6.10
 -16 -12   4   -7.90   14.40
 -10  16  -4   -0.60    5.50
 -16 -10   4   -5.10   12.70
  -8  16  -4    2.20    5.10
 -16  -8   4   -6.90   12.00
  -6  16  -4    0.40    5.10
 -16  -6   4   -9.40   10.30
  -4  16  -4    8.00    5.50
 -16  -4   4   -6.10    9.60
  -2  16  -4    3.20    5.40
 -16  -2   4   -1.20    9.20
   0  16  -4   26.00    6.60
 -16   0   4   25.10    9.80
   2  16  -4   11.30    5.90
 -16   2  -4   10.20    4.60
 -16   2   4    9.90    8.60
   4  16  -4   -4.60    5.00
 -16   4  -4   -1.00    3.90
 -16   4   4   -6.40    8.20
 -16   6  -4    2.70    4.50
   6  16  -4   -1.90    5.30
 -16   6   4   -3.40    8.20
 -16   8  -4    9.20    5.30
 -16   8   4   -3.70    8.40
 -16  10  -4    2.50    5.60
 -16  10   4    3.20    8.30
 -16  12  -4   -2.90    5.60
 -16  12   4    6.60    8.30
 -16  14  -4    4.50    6.70
 -11  17  -4   10.90    6.60
 -17 -11   4   13.60   15.20
  -9  17  -4   -0.70    5.40
 -17  -9   4   -0.70   13.40
  -7  17  -4   22.30    6.40
 -17  -7   4   27.60   13.20
  -5  17  -4   -2.50    5.40
 -17  -5   4   -8.00   10.80
  -3  17  -4   12.90    6.20
 -17  -3   4   -6.10   10.10
  -1  17  -4   19.80    6.30
 -17  -1   4   13.50   10.20
   1  17  -4    9.80    5.90
 -17   1   4   -3.60    9.00
 -17   3  -4    0.70    4.30
   3  17  -4   -3.40    5.50
 -17   3   4   -9.00    8.80
   5  17  -4   -2.40    5.40
 -17   5  -4    1.20    4.30
 -17   5   4   -7.10    8.70
 -17   7  -4    3.50    4.90
 -17   7   4   -3.20    9.20
 -17   9  -4    3.60    5.70
 -17   9   4   16.60   10.00
 -17  11  -4    8.80    6.30
 -17  11   4    6.90    8.90
 -10  18  -4   11.70    6.40
 -18 -10   4   15.40   14.50
  -8  18  -4    2.00    5.70
 -18  -8   4  -12.70   13.10
  -6  18  -4   -2.50    5.70
 -18  -6   4   -1.30   12.30
  -4  18  -4    2.40    5.90
 -18  -4   4    0.00   10.60
  -2  18  -4   11.40    6.10
 -18  -2   4    5.00   10.50
   0  18  -4    6.80    5.60
 -18   0   4   -4.50    9.30
   2  18  -4   -2.60    5.50
 -18   2   4    3.30    9.80
 -18   4  -4    7.80    4.90
 -18   4   4    5.10    9.60
 -18   6  -4    9.00    5.40
 -18   6   4   11.20    9.90
 -18   8  -4    1.00    5.40
 -18   8   4    0.80    9.70
 -18  10  -4   13.70    6.50
 -18  10   4   -0.60    9.60
  -9  19  -4   -2.00    5.90
 -19  -9   4    5.90   13.90
  -7  19  -4    4.70    5.80
 -19  -7   4   14.80   14.20
  -5  19  -4   -8.80    5.70
 -19  -5   4   -9.30   11.60
  -3  19  -4   16.30    6.60
 -19  -3   4    5.60   11.80
  -1  19  -4   16.20    6.60
 -19  -1   4   17.30   11.40
   1  19  -4    2.00    5.90
 -19   1   4   -3.10    9.80
 -19   3   4   28.20   11.50
 -19   5  -4    3.20    5.10
 -19   5   4    8.80   10.70
 -19   7  -4    0.20    5.40
 -19   7   4   -2.30   10.50
 -19   9  -4    5.20    6.00
 -19   9   4   -6.40   10.30
  -6  20  -4    5.00    5.80
 -20  -6   4   -7.20   12.60
  -4  20  -4    4.10    6.00
 -20  -4   4    0.40   12.50
  -2  20  -4    6.40    6.30
 -20  -2   4    3.20   11.70
 -20   0   4    7.20   11.00
 -20   2   4    0.70   10.80
 -20   4  -4    4.90    5.30
 -20   4   4    7.70   10.90
 -20   6  -4    3.60    5.20
 -20   6   4   11.10   11.30
  -3  21  -4   -9.20    5.50
 -21  -3   4   -4.60   12.00
  -1  21  -4   -3.20    5.70
 -21  -1   4   -5.40   11.70
 -21   1   4   11.00   11.90
 -21   3   4    1.50   10.90
   0  -1   5   32.20    8.30
  -1   0   5   -0.40    7.30
  -2  -1   5   15.10    8.30
   1  -2   5   25.70    8.10
  -2   1   5  117.19   14.90
  -1  -2   5  122.49   15.90
  -2   3  -5   40.00    6.10
  -3  -2   5   32.70    9.10
   0  -3   5   99.69   14.10
  -3   0   5  107.39   14.60
  -3   2  -5  151.18   12.30
  -2  -3   5  120.49   17.30
  -3   2   5  169.68   16.10
  -3   4  -5   18.00    4.50
  -4  -3   5   14.00    8.40
  -4  -1   5   47.50    9.80
  -1  -4   5  117.29   15.70
  -4   1   5  157.48   15.80
  -4   3  -5   77.29    8.30
  -3  -4   5   82.39   13.20
  -4   5  -5   27.40    4.90
  -5  -4   5   19.50    9.60
  -2   5  -5   -3.40    4.00
  -5  -2   5   -6.40    7.00
  -5   0   5   11.00    7.50
   0  -5   5   -2.20    7.10
  -5   2  -5   61.29    7.20
  -2  -5   5   38.40   10.50
  -5   2   5   61.59    9.60
  -5   4  -5   13.90    3.90
  -4  -5   5    1.80    8.00
  -5   6  -5   32.50    5.30
  -6  -5   5   26.20    9.80
  -3   6  -5   95.99   10.30
  -6  -3   5  130.69   15.70
  -1   6  -5   -3.20    4.90
  -6  -1   5    0.50    8.10
  -6   1   5   30.20    8.30
  -6   3  -5    5.20    3.20
  -3  -6   5   -3.00    7.30
  -6   3   5    6.40    6.40
  -6   5  -5    8.20    3.60
  -5  -6   5    4.90    8.10
  -6   7  -5    1.70    3.30
  -7  -6   5   -3.80    7.80
  -4   7  -5   97.99    9.70
  -7  -4   5   82.99   13.00
  -2   7  -5   -0.60    4.00
  -7  -2   5   -6.10    6.80
  -7   0   5   49.10   10.00
  -7   2   5    4.60    6.40
  -2  -7   5   11.10    8.30
  -7   4  -5   26.50    4.40
  -4  -7   5   22.80    9.20
  -7   6  -5    2.10    3.20
  -6  -7   5   -3.10    7.60
  -7   8  -5    9.80    3.90
  -8  -7   5   18.30    9.70
  -5   8  -5   23.50    4.90
  -8  -5   5   32.40    9.80
  -3   8  -5    1.10    3.90
  -8  -3   5   -2.30    7.10
  -1   8  -5   29.00    5.90
  -8  -1   5   23.60    8.70
  -8   1   5  154.78   16.50
  -8   3  -5   43.10    5.90
  -3  -8   5   39.40   11.60
  -8   3   5   38.00    8.70
  -8   5  -5   25.30    4.10
  -8   5   5   12.10    6.80
  -5  -8   5   27.00   10.20
  -8   7  -5   65.79    7.50
  -7  -8   5   42.20   12.30
  -8   9  -5   12.90    4.00
  -9  -8   5   14.20   10.80
  -6   9  -5   -1.10    3.40
  -9  -6   5   -1.70    7.90
  -4   9  -5   26.60    5.20
  -9  -4   5   34.50    9.60
  -2   9  -5   -3.50    4.10
  -9  -2   5    7.30    7.00
   0   9  -5  129.89   12.10
  -9   0   5   96.49   14.30
  -2  -9   5   76.49   14.50
  -9   2   5   78.09   12.30
  -9   4  -5   23.60    4.00
  -9   4   5   15.80    7.20
  -4  -9   5   18.20   10.70
  -9   6  -5   75.49    7.90
  -6  -9   5   61.59   14.50
  -9   8  -5    3.20    3.30
  -8  -9   5   -1.20   10.50
  -9  10  -5    9.90    4.00
 -10  -9   5    8.30   11.50
  -7  10  -5   -3.10    3.60
 -10  -7   5   -5.00    9.30
  -5  10  -5   -0.40    3.90
 -10  -5   5   -4.90    8.10
  -3  10  -5   10.50    4.70
 -10  -3   5    6.40    8.10
  -1  10  -5    8.10    4.90
 -10  -1   5    9.60    7.30
   1  10  -5   18.40    5.70
 -10   1   5   15.50    7.30
 -10   3  -5    0.80    2.80
 -10   3   5    4.60    6.30
  -3 -10   5   -2.20    9.80
 -10   5  -5   60.39    6.90
 -10   5   5   55.49    9.70
  -5 -10   5   31.00   13.10
 -10   7  -5   26.50    4.90
 -10   7   5   37.70    8.50
  -7 -10   5   32.60   12.80
 -10   9  -5    4.30    3.90
  -9 -10   5   -4.60   12.00
 -10  11  -5   54.89    8.70
 -11 -10   5   54.79   15.30
  -8  11  -5   -1.10    3.90
 -11  -8   5   -8.40   10.30
  -6  11  -5   35.10    5.90
 -11  -6   5   25.60   10.60
  -4  11  -5    0.70    4.20
 -11  -4   5   -8.50    7.80
  -2  11  -5    7.10    4.90
 -11  -2   5   -1.80    7.70
   0  11  -5    5.90    4.80
 -11   0   5    8.50    6.70
 -11   2   5   23.50    8.40
 -11   4  -5    8.60    3.30
  -4 -11   5   -5.60   11.60
 -11   4   5    0.50    6.40
 -11   6  -5   27.60    4.70
 -11   6   5   30.40    8.50
  -6 -11   5   20.30   13.50
 -11   8  -5    3.20    3.70
  -8 -11   5  -15.50   11.70
 -11   8   5   -1.90    6.90
 -11  10  -5   30.00    5.60
 -10 -11   5   15.70   15.00
 -12 -11   5   22.40   14.70
  -9  12  -5    5.90    4.70
 -12  -9   5    6.50   12.10
  -7  12  -5   33.60    6.20
 -12  -7   5   36.00   12.60
  -5  12  -5    5.20    4.70
 -12  -5   5    2.30    9.00
  -3  12  -5    1.00    4.80
 -12  -3   5    4.10    8.50
  -1  12  -5   19.30    5.90
 -12  -1   5   16.60    8.30
   1  12  -5   26.30    6.60
 -12   1   5   23.30    8.70
 -12   3  -5   -0.50    3.00
 -12   3   5    3.20    6.50
 -12   5  -5   -1.30    3.40
  -5 -12   5   -2.00   12.70
 -12   5   5   -3.00    6.90
 -12   7  -5    1.80    3.70
 -12   7   5   10.10    7.40
  -7 -12   5   -7.70   13.10
 -12   9  -5   18.90    4.80
  -9 -12   5  -21.60   13.90
 -12   9   5   23.30    8.80
 -12  11  -5   11.50    5.40
 -11 -12   5   17.60   15.10
 -12  13  -5    1.30    5.10
 -13 -12   5   -4.20   14.70
 -10  13  -5   12.80    5.40
 -13 -10   5   20.80   13.80
  -8  13  -5   -2.60    4.50
 -13  -8   5    9.30   11.70
  -6  13  -5   22.40    6.10
 -13  -6   5   24.50   11.00
  -4  13  -5    5.80    5.30
 -13  -4   5    3.00    9.20
  -2  13  -5   33.40    7.00
 -13  -2   5   33.90   10.30
   0  13  -5   23.10    6.60
 -13   0   5   31.40    9.00
   2  13  -5   -1.20    5.40
 -13   2   5    3.80    7.60
 -13   4  -5    3.30    3.60
 -13   4   5    3.70    7.50
 -13   6  -5    0.10    3.80
 -13   6   5    5.80    7.40
  -6 -13   5   -7.90   13.80
 -13   8  -5    4.90    4.40
  -8 -13   5  -28.00   14.40
 -13   8   5    6.90    7.60
 -13  10  -5    7.00    5.20
 -10 -13   5    7.20   15.80
 -13  12  -5    7.50    5.50
 -12 -13   5    2.40   15.30
 -13  14  -5    4.00    5.60
 -14 -13   5   -8.10   15.50
 -11  14  -5    6.50    5.20
 -14 -11   5    3.70   14.10
  -9  14  -5    3.60    5.00
 -14  -9   5   -7.40   11.80
  -7  14  -5   -0.20    5.00
 -14  -7   5    6.80   10.90
  -5  14  -5    0.90    5.40
 -14  -5   5   -2.00   10.30
  -3  14  -5   20.90    6.60
 -14  -3   5   19.50   10.20
  -1  14  -5   22.60    6.50
 -14  -1   5   17.20    9.20
   1  14  -5    1.60    5.60
 -14   1   5   -2.80    7.40
   3  14  -5    2.40    5.70
 -14   3   5    4.60    7.90
 -14   5  -5    8.10    4.30
 -14   5   5   18.70    8.60
 -14   7  -5   -2.70    4.00
  -7 -14   5  -15.40   14.50
 -14   7   5   -0.60    7.90
 -14   9  -5   -1.50    4.70
  -9 -14   5  -21.20   14.70
 -14   9   5    5.30    8.00
 -14  11  -5    0.80    5.40
 -11 -14   5   -4.10   15.90
 -14  11   5   14.30    8.50
 -14  13  -5   -2.90    5.40
 -13 -14   5  -13.60   15.90
 -12  15  -5    8.50    6.10
 -15 -12   5    9.30   16.00
 -10  15  -5    0.80    5.30
 -15 -10   5   12.30   13.90
  -8  15  -5   -1.40    5.10
 -15  -8   5  -12.20   11.30
  -6  15  -5   -7.80    4.90
 -15  -6   5   -4.60   11.20
  -4  15  -5   -3.40    5.40
 -15  -4   5   -1.10   10.30
  -2  15  -5   -0.40    5.80
 -15  -2   5   -1.80    8.90
   0  15  -5   15.70    6.40
 -15   0   5   13.60    9.20
   2  15  -5   -3.90    5.40
 -15   2   5   -5.30    7.90
 -15   4  -5    4.90    3.90
   4  15  -5    3.10    6.00
 -15   4   5    4.00    8.60
 -15   6  -5    0.90    4.00
 -15   6   5    2.10    8.60
 -15   8  -5   -1.20    4.60
 -15   8   5    4.20    8.40
  -8 -15   5   -5.30   15.00
 -15  10  -5   -0.20    5.20
 -15  10   5    7.60    8.40
 -10 -15   5  -14.20   14.80
 -15  12  -5   -1.20    5.50
 -12 -15   5  -31.00   15.10
 -11  16  -5    1.90    5.80
 -16 -11   5   14.00   16.00
  -9  16  -5    0.70    5.50
 -16  -9   5    3.00   13.90
  -7  16  -5   11.70    6.00
 -16  -7   5    2.40   12.50
  -5  16  -5    6.60    5.80
 -16  -5   5   -3.90   10.70
  -3  16  -5   -0.30    5.70
 -16  -3   5   -9.50    9.60
  -1  16  -5    2.60    6.00
 -16  -1   5   -1.80    9.30
   1  16  -5    8.70    6.20
 -16   1   5    6.00    9.40
   3  16  -5    0.80    6.00
 -16   3  -5    2.20    4.10
 -16   3   5   -1.00    8.90
   5  16  -5   -3.30    5.70
 -16   5  -5    0.30    4.30
 -16   5   5    2.90    9.10
 -16   7  -5    3.60    4.60
 -16   7   5    8.00    9.20
 -16   9  -5   13.00    5.70
 -16   9   5   15.80    9.60
 -16  11  -5    3.90    5.60
 -16  11   5    3.90    8.80
 -10  17  -5   -1.00    5.70
 -17 -10   5    0.60   14.30
  -8  17  -5    6.90    5.90
 -17  -8   5   10.40   13.80
  -6  17  -5    9.70    6.50
 -17  -6   5   -7.90   12.20
  -4  17  -5   -1.00    5.80
 -17  -4   5    2.00   11.20
  -2  17  -5    7.90    6.20
 -17  -2   5   -0.30   10.00
   0  17  -5   -1.00    6.10
 -17   0   5   -5.30    9.30
   2  17  -5    2.20    6.40
 -17   2   5    7.70    9.70
   4  17  -5    2.80    6.30
 -17   4   5    4.20    9.60
 -17   6  -5    0.90    4.60
   6  17  -5   -1.60    6.20
 -17   6   5   -3.40    9.50
 -17   8  -5    3.00    5.00
 -17   8   5    3.80    9.50
 -17  10  -5    5.80    5.80
 -17  10   5    9.00    9.60
  -9  18  -5   -7.10    5.70
 -18  -9   5   -0.40   13.80
  -7  18  -5    7.30    6.50
 -18  -7   5    1.80   13.20
  -5  18  -5   -5.10    6.10
 -18  -5   5  -13.80   11.50
  -3  18  -5   13.90    7.00
 -18  -3   5   16.80   12.00
  -1  18  -5   14.10    6.80
 -18  -1   5   12.40   10.80
   1  18  -5   -4.70    6.00
 -18   1   5    1.90   10.20
   3  18  -5    3.80    6.50
 -18   3   5    4.20   10.20
 -18   5  -5    1.60    4.70
   5  18  -5   -1.60    6.00
 -18   5   5    2.80   10.30
 -18   7  -5   -1.30    4.80
   7  18  -5    0.10    6.10
 -18   7   5    2.70   10.00
   9  18  -5    4.10    6.10
 -18   9  -5    0.90    5.50
 -18   9   5    9.80   10.20
 -19  -6   5   16.70   13.80
  -4  19  -5   -6.80    6.10
 -19  -4   5    1.80   12.30
  -2  19  -5   13.00    6.90
 -19  -2   5   16.00   12.00
   0  19  -5    2.70    6.30
 -19   0   5   -1.90   10.80
   2  19  -5    7.80    6.60
 -19   2   5    3.50   10.90
 -19   4   5    3.30   10.70
 -19   6  -5    5.60    5.20
 -19   6   5   -6.50   10.70
  -1  20  -5   -9.80    6.30
 -20  -1   5   12.50   12.10
   1  20  -5    0.80    6.60
 -20   1   5   -0.30   11.40
  -1  -1   6    3.70    7.80
   0  -2   6   25.90   10.00
  -2   2  -6   56.69    8.60
  -2  -2   6   65.79   12.10
  -3  -1   6   -3.60    7.80
  -3   1   6   -2.10    7.50
  -1  -3   6    2.20    8.50
  -3   3  -6   -0.90    4.10
  -3  -3   6    4.70    7.90
  -2   4  -6   -2.80    4.50
  -4  -2   6   -6.60    7.70
  -4   0   6   48.40   11.10
   0  -4   6   51.99   12.60
  -4   2  -6  123.99   11.20
  -2  -4   6  113.09   16.10
  -4   4  -6    2.20    3.80
  -4  -4   6   -2.50    7.90
  -3   5  -6    1.00    4.10
  -5  -3   6    1.40    8.20
  -1   5  -6    4.90    4.90
  -5  -1   6   -1.90    8.50
  -5   1   6    4.70    7.40
  -1  -5   6   -4.10    8.90
  -5   3  -6    8.10    4.40
  -5   3   6   13.40    7.30
  -3  -5   6    9.50    9.10
  -5   5  -6    6.50    4.10
  -5  -5   6   -3.00    8.70
  -4   6  -6   39.80    6.40
  -6  -4   6   52.79   11.60
  -2   6  -6   -1.40    4.30
  -6  -2   6  -12.40    7.60
  -6   0   6   -9.80    7.40
  -6   2   6    1.90    7.70
  -2  -6   6   11.70    9.60
  -6   4  -6    1.80    3.70
  -4  -6   6   -4.60    8.70
  -6   6  -6   23.10    5.10
  -6  -6   6   28.40   11.40
  -5   7  -6    1.80    4.10
  -7  -5   6    1.20    9.00
  -3   7  -6   -0.30    4.00
  -7  -3   6    0.00    7.90
  -1   7  -6    1.30    4.90
  -7  -1   6   -5.20    8.50
  -7   1   6   -2.50    7.70
  -7   3  -6   11.10    4.00
  -7   3   6   18.50    8.50
  -3  -7   6   15.50   10.40
  -7   5  -6    0.00    3.70
  -5  -7   6    4.80   10.20
  -7   7  -6    2.50    4.00
  -7  -7   6   -0.30    9.90
  -8  -6   6   18.40   10.60
  -4   8  -6   37.60    6.40
  -8  -4   6   39.20   11.00
  -2   8  -6   -3.80    4.50
  -8  -2   6   -3.00    8.40
   0   8  -6  130.69   12.70
  -8   0   6  106.49   15.80
  -8   2   6   60.89   11.50
  -2  -8   6   66.09   14.30
  -8   4  -6    8.20    3.80
  -8   4   6    2.10    7.80
  -4  -8   6   10.10   11.10
  -8   6  -6   20.80    4.90
  -6  -8   6   26.30   12.10
  -8   8  -6    5.00    4.10
  -8  -8   6    0.60   11.30
  -7   9  -6    0.40    4.10
  -9  -7   6   -2.00   10.50
  -5   9  -6   -0.40    4.10
  -9  -5   6   10.30    9.70
  -3   9  -6   -4.20    4.40
  -9  -3   6    6.50    9.20
  -1   9  -6   -3.30    4.90
  -9  -1   6   14.20    9.00
  -9   1   6    7.80    8.30
  -9   3   6    4.40    8.10
  -3  -9   6    8.70   11.30
  -9   5  -6    3.50    3.80
  -5  -9   6   13.30   12.50
  -9   7  -6    8.00    4.10
  -7  -9   6    8.50   11.90
  -9   9  -6    1.30    4.00
  -9  -9   6   -3.30   12.30
  -8  10  -6    1.00    4.30
 -10  -8   6   -7.50   12.10
  -6  10  -6   12.30    4.90
 -10  -6   6   11.20   11.00
  -4  10  -6    0.10    4.50
 -10  -4   6   -5.80    8.70
  -2  10  -6  -11.50    4.60
 -10  -2   6    2.30    8.50
   0  10  -6   33.10    7.10
 -10   0   6   36.00   10.50
 -10   2   6   22.10    9.40
  -4 -10   6   35.90   14.90
 -10   4   6   33.20   10.10
 -10   6  -6   60.59    8.00
  -6 -10   6   59.39   16.10
 -10   6   6   57.49   11.20
 -10   8  -6    3.30    3.90
  -8 -10   6  -14.80   12.90
 -10  10  -6   32.40    6.20
 -10 -10   6   26.30   15.40
  -9  11  -6    3.60    4.60
 -11  -9   6    3.40   13.00
  -7  11  -6    0.40    4.60
 -11  -7   6   -2.90   10.90
  -5  11  -6   -5.10    4.40
 -11  -5   6  -10.80    9.00
  -3  11  -6    2.50    5.00
 -11  -3   6  -12.20    8.70
  -1  11  -6   -5.10    5.10
 -11  -1   6   -0.90    8.60
   1  11  -6    4.30    6.10
 -11   1   6    8.50    9.00
 -11   3  -6    6.30    3.60
 -11   3   6    2.30    8.10
 -11   5  -6    4.40    3.90
 -11   5   6    7.30    8.00
  -5 -11   6    3.40   13.80
 -11   7  -6    1.10    4.20
 -11   7   6    7.50    8.70
  -7 -11   6   -6.70   14.00
 -11   9  -6   -1.00    4.50
  -9 -11   6   -0.40   15.00
 -11  11  -6    5.60    4.90
 -11 -11   6   22.10   15.80
 -10  12  -6    4.60    5.20
 -12 -10   6   13.80   14.80
  -8  12  -6    1.50    5.00
 -12  -8   6    2.50   12.00
  -6  12  -6   33.40    6.70
 -12  -6   6   43.90   13.10
  -4  12  -6    0.90    5.10
 -12  -4   6    1.00    9.80
 -12  -2   6   35.10   11.50
   0  12  -6   17.90    6.50
 -12   0   6   34.30   10.50
   2  12  -6   -2.30    5.90
 -12   2   6    1.30    7.90
 -12   4   6    9.50    8.40
 -12   6  -6   -5.50    3.80
  -6 -12   6   -4.20   14.20
 -12   6   6    6.40    8.50
 -12   8  -6    2.50    4.20
  -8 -12   6  -13.00   15.40
 -12  10  -6   16.80    5.50
 -10 -12   6   10.10   16.10
 -12  12  -6    3.90    5.20
 -12 -12   6   -8.70   15.40
 -11  13  -6   -1.20    5.10
 -13 -11   6   -0.30   15.50
  -9  13  -6    1.50    5.10
 -13  -9   6   11.80   13.90
  -7  13  -6    2.30    5.20
 -13  -7   6    6.10   11.70
 -13  -5   6   15.30   11.20
  -3  13  -6    4.20    5.90
 -13  -3   6    4.50   10.40
  -1  13  -6    0.30    5.70
 -13  -1   6    3.60    9.30
   1  13  -6    2.20    5.90
 -13   1   6    2.10    8.80
   3  13  -6    0.00    5.90
 -13   3   6   -3.50    7.80
 -13   5  -6   -1.70    3.80
 -13   5   6    3.60    8.60
 -13   7  -6   -3.60    4.00
 -13   7   6    8.20    8.80
  -7 -13   6   -3.60   15.60
 -13   9  -6    0.90    4.70
  -9 -13   6   -5.50   16.30
 -13  11  -6    1.20    5.00
 -11 -13   6  -16.10   15.10
 -13  13  -6    4.10    5.50
 -13 -13   6  -12.90   16.30
 -12  14  -6    8.40    5.80
 -14 -12   6    4.10   17.20
 -10  14  -6    1.60    5.30
 -14 -10   6   -2.80   14.90
  -8  14  -6   -4.20    5.00
 -14  -8   6    6.50   13.20
  -6  14  -6   -3.20    5.40
 -14  -6   6   12.40   11.90
  -4  14  -6   -9.00    5.50
 -14  -4   6   -9.50    9.70
  -2  14  -6   19.70    7.00
 -14  -2   6   21.30   10.90
   0  14  -6   18.70    7.00
 -14   0   6   22.50   10.70
   2  14  -6    3.00    6.10
 -14   2   6    4.80    8.90
   4  14  -6   24.00    7.40
 -14   4  -6   15.30    4.70
 -14   4   6   33.50   10.70
 -14   6  -6    2.70    4.20
 -14   6   6    7.60    8.90
 -14   8  -6   -1.80    4.50
  -8 -14   6    9.60   17.00
 -14   8   6    9.30    9.20
 -14  10  -6   -1.30    5.00
 -10 -14   6  -19.40   16.00
 -14  12  -6    2.60    5.40
 -12 -14   6  -15.30   16.70
 -11  15  -6   -1.70    5.60
 -15 -11   6   -0.30   16.20
  -9  15  -6    2.30    5.70
 -15  -9   6   14.10   14.20
  -7  15  -6   -0.80    5.50
 -15  -7   6   -5.10   12.40
  -5  15  -6   -3.90    5.90
 -15  -5   6   -8.80   10.70
  -3  15  -6    0.30    6.30
 -15  -3   6    5.70   11.10
  -1  15  -6    4.50    6.60
 -15  -1   6    5.60    9.80
   1  15  -6    4.20    6.60
 -15   1   6   11.20    9.80
   3  15  -6    0.80    6.30
 -15   3   6    6.20    9.20
   5  15  -6    2.10    6.40
 -15   5  -6    2.90    4.30
 -15   5   6    2.90    9.60
 -15   7  -6   -0.60    4.50
 -15   7   6    4.60    9.30
  -9 -15   6   75.99   21.30
 -15   9   6   11.60   10.10
 -15  11   6    9.90    9.30
 -11 -15   6   19.00   20.10
  -8  16  -6    4.60    6.20
 -16  -8   6   -2.60   13.30
  -6  16  -6    6.60    6.40
 -16  -6   6    9.80   12.20
  -4  16  -6   -0.30    6.20
 -16  -4   6   -4.20   11.10
  -2  16  -6    4.50    6.70
 -16  -2   6   -1.40   10.30
   0  16  -6    3.40    6.50
 -16   0   6   -1.10    9.80
   2  16  -6   -5.20    6.30
 -16   2   6   -3.20    9.30
   4  16  -6    2.00    6.50
 -16   4   6    2.10   10.10
 -16   6  -6    3.00    4.50
   6  16  -6    2.30    6.60
 -16   6   6   -1.00    9.40
 -16   8  -6    7.80    5.10
 -16   8   6   11.80   10.60
  -7  17  -6   -1.10    6.20
 -17  -7   6   29.40   14.00
  -5  17  -6   -2.70    6.40
 -17  -5   6    9.10   12.90
  -3  17  -6    4.00    6.80
 -17  -3   6    3.30   11.80
  -1  17  -6   -4.80    6.30
 -17  -1   6    6.70   10.90
   1  17  -6   -7.10    6.40
 -17   1   6   -3.30   10.10
   3  17  -6    0.40    6.60
 -17   3   6   -3.00    9.80
   5  17  -6    0.80    6.70
 -17   5  -6   -1.80    4.50
 -17   5   6    7.50   10.60
 -17   7  -6    1.50    4.90
   7  17  -6    5.30    6.50
 -17   7   6  -10.20    9.20
  -4  18  -6  -10.20    6.20
 -18  -4   6    7.50   13.00
  -2  18  -6   16.30    7.50
 -18  -2   6    6.40   11.90
   0  18  -6    7.20    7.30
 -18   0   6    2.60   11.00
   2  18  -6    0.00    6.80
 -18   2   6   -5.60   10.50
 -18   4  -6    2.40    4.70
   4  18  -6    0.60    7.00
 -18   4   6    9.50   11.20
  -1   0   7   -3.90    8.90
  -2  -1   7    7.00   10.20
  -1  -2   7   12.70   10.60
  -2   3  -7    2.50    5.20
  -3  -2   7   13.40   10.50
  -3   0   7   20.50   10.30
  -2  -3   7   40.10   12.20
  -3   4  -7    1.10    5.00
  -4  -3   7    2.80   10.30
  -1   4  -7    2.10    5.40
  -4  -1   7   -1.80    9.90
  -1  -4   7   21.90   11.90
  -4   1   7   31.20   10.90
  -4   3  -7   20.70    5.90
  -3  -4   7   23.80   12.10
  -4   5  -7    2.80    4.90
  -5  -4   7    3.10   11.30
  -2   5  -7    0.40    5.00
  -5  -2   7   -0.70   10.50
  -5   0   7   -4.90    9.60
  -5   2   7    4.50    9.00
  -2  -5   7  -11.30   10.70
  -5   4  -7   -0.80    4.80
  -4  -5   7   -0.30   11.30
  -5   6  -7    6.60    5.10
  -6  -5   7   13.50   12.20
  -3   6  -7    7.40    5.50
  -6  -3   7   11.10   10.90
  -1   6  -7    1.90    5.40
  -6  -1   7   -5.90   10.20
  -6   1   7   11.60    9.80
  -6   3  -7    0.80    4.50
  -6   3   7   12.80    9.30
  -3  -6   7    6.30   11.80
  -6   5  -7    4.20    4.80
  -5  -6   7    0.00   11.80
  -6   7  -7    2.60    4.80
  -7  -6   7   10.90   12.60
  -4   7  -7   15.10    5.80
  -7  -4   7   23.10   12.20
  -2   7  -7   -2.70    5.00
  -7  -2   7    7.90   10.60
   0   7  -7   30.60    7.20
  -7   0   7   21.00   11.30
  -7   2   7   15.80   10.30
  -7   4  -7    3.00    4.60
  -4  -7   7   -0.70   12.60
  -7   6  -7   -0.70    4.60
  -6  -7   7   14.60   13.30
  -7   8  -7    1.60    4.70
  -8  -7   7   -9.20   12.20
  -5   8  -7   -0.10    5.00
  -8  -5   7    5.50   11.70
  -3   8  -7    1.50    5.30
  -8  -3   7   -2.50   10.70
  -1   8  -7    3.50    5.70
  -8  -1   7   11.70   10.50
  -8   1   7   54.19   12.40
  -3  -8   7   18.30   13.30
  -8   3   7   -1.30    9.50
  -8   5  -7    4.20    4.50
  -5  -8   7    5.50   13.40
  -8   7  -7   -1.00    4.40
  -7  -8   7    5.70   13.10
  -8   9  -7   -1.40    4.60
  -9  -8   7  -14.40   12.60
  -6   9  -7   -0.60    4.80
  -9  -6   7   -4.90   11.50
  -4   9  -7    0.00    5.30
  -9  -4   7    4.60   10.60
  -2   9  -7   -5.40    5.20
  -9  -2   7    3.70   10.00
   0   9  -7   17.90    6.90
  -9   0   7   34.00   11.20
  -9   2   7   17.10   10.10
  -9   4  -7    6.40    4.60
  -9   4   7   11.60   10.20
  -4  -9   7   14.30   14.20
  -9   6  -7   19.00    5.40
  -6  -9   7   15.90   14.50
  -9   8  -7    1.40    4.50
  -8  -9   7   -5.80   13.90
  -9  10  -7    5.60    5.10
 -10  -9   7   -2.20   14.00
  -7  10  -7    1.90    5.10
 -10  -7   7    0.00   12.60
  -5  10  -7    0.80    5.10
 -10  -5   7    0.00   11.10
  -3  10  -7   -9.50    5.10
 -10  -3   7   -3.50   10.60
  -1  10  -7   -0.10    5.80
 -10  -1   7    0.90    9.40
   1  10  -7    4.80    6.60
 -10   1   7   16.70   10.60
 -10   3   7    0.50    9.60
 -10   5  -7    9.50    4.70
  -5 -10   7    9.40   14.70
 -10   5   7   13.60   10.40
 -10   7  -7   -0.80    4.50
  -7 -10   7   -4.50   14.50
 -10   9  -7    1.00    4.70
  -9 -10   7    5.20   15.20
 -10  11  -7    1.50    5.00
 -11 -10   7   -5.00   14.10
  -8  11  -7    1.80    5.30
 -11  -8   7   -7.80   13.00
  -6  11  -7    8.40    5.50
 -11  -6   7    6.50   12.40
  -4  11  -7   -3.30    5.40
 -11  -4   7   -4.00   10.80
  -2  11  -7    2.60    6.00
 -11  -2   7    6.90   10.70
   0  11  -7    0.90    5.90
 -11   0   7    6.10   10.20
   2  11  -7    0.70    6.20
 -11   2   7    1.00    9.70
 -11   4  -7    1.00    4.30
 -11   4   7    6.00    9.80
 -11   6  -7    1.50    4.40
 -11   6   7   13.00   10.40
  -6 -11   7    4.30   15.80
 -11   8  -7    0.20    4.70
  -8 -11   7  -20.80   14.50
 -11  10  -7    6.20    5.40
 -10 -11   7   -4.30   15.70
 -11  12  -7    1.50    5.40
 -12 -11   7   -9.70   15.80
  -9  12  -7    1.40    5.50
 -12  -9   7  -17.00   13.40
  -7  12  -7    0.50    5.70
 -12  -7   7    5.30   13.20
  -5  12  -7    6.20    6.00
 -12  -5   7   11.10   11.90
  -3  12  -7   -5.50    5.70
 -12  -3   7    7.80   11.30
  -1  12  -7    2.50    6.30
 -12  -1   7    2.50   10.50
   1  12  -7    4.40    6.10
 -12   1   7   14.90   10.80
   3  12  -7    2.00    6.40
 -12   3   7    9.30    9.80
 -12   5  -7   -2.10    4.20
 -12   5   7    5.00    9.80
 -12   7  -7    3.00    4.70
  -7 -12   7   -6.30   15.70
 -12   7   7   14.90   10.90
 -12   9  -7    0.60    4.80
  -9 -12   7  -13.20   15.70
 -12  11  -7   -1.00    5.20
 -11 -12   7  -11.30   16.50
 -10  13  -7   -8.40    5.40
 -13 -10   7  -11.80   14.50
  -8  13  -7   -0.70    5.70
 -13  -8   7    0.30   13.20
  -6  13  -7    1.60    5.90
 -13  -6   7    2.90   11.80
  -4  13  -7   -3.80    5.80
 -13  -4   7   -1.70   11.00
  -2  13  -7    2.40    6.40
 -13  -2   7   11.10   10.80
   0  13  -7    5.20    6.50
 -13   0   7   11.90   10.90
   2  13  -7   -2.80    6.10
 -13   2   7    6.30   10.50
   4  13  -7    6.80    6.40
 -13   4   7    4.30   10.00
 -13   6  -7    0.70    4.40
 -13   6   7   14.50   10.40
 -13   8  -7    2.80    4.80
  -8 -13   7    1.70   16.80
 -13  10  -7    0.80    5.20
 -10 -13   7   -3.30   16.60
  -7  14  -7    0.10    6.10
 -14  -7   7   -2.00   12.80
  -5  14  -7   -3.90    6.20
 -14  -5   7    3.00   11.50
  -3  14  -7    0.90    6.40
 -14  -3   7    2.80   11.10
  -1  14  -7    0.30    6.60
 -14  -1   7    2.60   10.40
   1  14  -7    3.50    6.50
 -14   1   7   -1.80   10.40
   3  14  -7    5.00    6.70
 -14   3   7    4.70   10.40
   5  14  -7    3.30    6.40
 -14   5   7   12.10   10.80
 -14   7  -7    0.10    4.70
 -14   7   7    5.00   10.20
  -6  15  -7   -2.00    6.30
 -15  -6   7    6.10   12.60
  -4  15  -7   -5.00    6.40
 -15  -4   7   -0.90   11.80
  -2  15  -7    3.90    6.90
 -15  -2   7    4.90   10.80
   0  15  -7   -6.00    6.50
 -15   0   7   -2.70   10.70
   2  15  -7   -1.00    6.60
 -15   2   7    5.40   10.90
 -15   4  -7   -1.50    4.50
   4  15  -7    2.50    7.00
 -15   4   7    3.20   10.50
   6  15  -7    0.90    6.60
 -15   6  -7    0.90    4.80
 -15   6   7   10.70   11.10
  -3  16  -7   -9.80    6.20
 -16  -3   7   -3.80   11.60
  -1  16  -7    4.70    7.20
 -16  -1   7    0.70   11.30
   1  16  -7   -5.20    6.60
 -16   1   7   -6.50   10.80
   3  16  -7    0.90    7.10
 -16   3   7   -3.20   10.20
  -2   0   8   -4.20   10.40
  -2   2  -8    2.20    5.60
  -2  -2   8   11.10   11.60
  -1   3  -8    5.60    6.00
  -3  -1   8   -8.30   11.10
  -3  -3   8    6.30   12.30
  -2   4  -8    1.30    5.50
  -4  -2   8    3.00   11.90
   0   4  -8    4.20    6.30
  -2  -4   8    4.20   12.50
  -4   4  -8   -0.30    5.60
  -4  -4   8    7.60   12.90
  -3   5  -8    2.70    5.80
  -5  -3   8    8.00   12.50
  -1   5  -8    2.90    6.10
  -5  -1   8   -7.10   11.40
  -3  -5   8   10.30   13.20
  -5   5  -8   -2.40    5.40
  -5  -5   8    7.60   13.80
  -4   6  -8   -2.60    5.70
  -6  -4   8    3.20   13.00
  -2   6  -8    5.40    5.90
  -6  -2   8    2.20   11.80
   0   6  -8    3.30    6.40
  -6   0   8    4.10   12.00
  -6   4  -8   -0.30    5.20
  -4  -6   8    1.50   13.70
  -6   6  -8   -3.70    5.20
  -6  -6   8  -11.80   13.30
  -5   7  -8    9.60    6.20
  -7  -5   8   12.20   13.80
  -3   7  -8    6.10    6.20
  -7  -3   8    5.80   12.60
  -1   7  -8    9.30    6.20
  -7  -1   8   21.50   12.70
   1   7  -8   17.40    7.40
  -7   1   8   15.70   12.10
  -5  -7   8   -5.10   14.30
  -7   7  -8   -3.60    5.30
  -7  -7   8   -6.00   14.10
  -6   8  -8   -6.80    5.40
  -8  -6   8    0.90   13.20
  -4   8  -8   -5.50    5.30
  -8  -4   8    8.90   13.40
  -2   8  -8    2.20    6.10
  -8  -2   8   -3.10   11.90
   0   8  -8   13.60    6.90
  -8   0   8    6.00   11.50
  -8   2   8   14.20   11.60
  -4  -8   8   -7.50   13.90
  -8   6  -8   -1.30    5.20
  -6  -8   8   -7.70   14.80
  -8   8  -8   -1.20    5.40
  -8  -8   8   -5.00   14.40
  -7   9  -8    0.30    5.50
  -9  -7   8   -0.80   13.60
  -5   9  -8    2.70    5.80
  -9  -5   8    1.40   12.90
  -3   9  -8   -5.10    5.80
  -9  -3   8   -2.10   12.10
  -1   9  -8    5.00    6.40
  -9  -1   8    1.80   11.90
   1   9  -8    6.30    6.60
  -9   1   8   16.30   12.10
  -9   3   8    5.00   11.20
  -5  -9   8   31.90   16.50
  -9   7  -8   -1.00    5.20
  -7  -9   8   -2.80   15.00
  -9   9  -8   -1.40    5.30
  -9  -9   8    1.70   15.00
  -8  10  -8    0.30    5.50
 -10  -8   8   -9.80   14.10
  -6  10  -8   -2.30    5.70
 -10  -6   8   -8.80   13.20
  -4  10  -8   -0.10    5.90
 -10  -4   8   13.00   12.90
  -2  10  -8    0.40    6.30
 -10  -2   8    7.90   12.50
   0  10  -8   -2.50    6.30
 -10   0   8   22.50   12.20
   2  10  -8    4.30    6.70
 -10   2   8    5.90   11.20
 -10   6  -8   -3.70    4.70
  -6 -10   8   11.80   15.90
 -10   8  -8    0.90    5.10
  -8 -10   8   -6.00   15.00
  -7  11  -8   -1.70    5.90
 -11  -7   8    2.60   14.10
  -5  11  -8    1.80    6.20
 -11  -5   8    1.60   13.20
  -3  11  -8   -5.80    6.00
 -11  -3   8   13.10   12.90
  -1  11  -8    6.30    6.80
 -11  -1   8    7.20   12.10
   1  11  -8    2.20    6.60
 -11   1   8    0.50   11.00
   3  11  -8    1.90    6.40
 -11   3   8    3.40   11.20
 -11   5   8   -0.30   11.50
 -11   7  -8   -1.70    5.00
  -7 -11   8  -27.70   14.00
  -6  12  -8   -2.30    6.40
 -12  -6   8   -7.10   12.90
  -4  12  -8   -4.30    6.40
 -12  -4   8    1.30   13.10
  -2  12  -8    1.00    6.80
 -12  -2   8   -8.10   11.70
   0  12  -8    4.10    6.90
 -12   0   8   -3.30   11.30
   2  12  -8    0.80    6.70
 -12   2   8    3.90   11.00
   4  12  -8    6.70    6.50
 -12   4   8   -4.70   11.10
  -3  13  -8   -0.50    6.60
 -13  -3   8    3.00   12.10
  -1  13  -8    8.40    7.20
 -13  -1   8   15.30   12.40
   1  13  -8   -1.90    6.70
 -13   1   8   -0.90   11.30
   3  13  -8    4.20    6.90
 -13   3   8    4.60   11.60
  -2   3  -9    0.50    5.80
  -3  -2   9    5.70   12.80
   0   3  -9    7.60    6.20
  -3   4  -9    0.40    5.90
  -1   4  -9    2.30    6.30
   1   4  -9   -0.70    6.10
  -4   5  -9   -0.60    5.80
  -5  -4   9  -11.70   13.70
  -2   5  -9   -2.80    6.20
  -5  -2   9   -2.90   13.50
   0   5  -9   -0.40    6.10
  -4  -5   9    1.90   13.90
  -5   6  -9   -2.70    5.80
  -6  -5   9   -5.80   14.30
  -3   6  -9   -0.50    6.10
  -6  -3   9  -14.20   13.20
  -1   6  -9   -2.10    6.10
  -6  -1   9  -14.80   12.30
   1   6  -9   -3.40    6.50
  -6   1   9    3.30   12.50
  -5  -6   9    3.20   15.20
  -6   7  -9    0.80    6.00
  -7  -6   9   -1.90   15.10
  -4   7  -9    5.90    6.30
  -7  -4   9    1.00   14.50
  -2   7  -9    5.30    6.70
  -7  -2   9   -1.90   13.50
   0   7  -9    8.80    6.90
  -7   0   9   -3.20   12.80
   2   7  -9    7.20    6.90
  -7   2   9    1.90   12.70
  -7   6  -9   -7.30    5.40
  -6  -7   9  -11.20   14.60
  -5   8  -9   -3.60    5.90
  -8  -5   9  -10.30   14.20
  -3   8  -9   -5.60    6.20
  -8  -3   9   -2.20   14.00
  -1   8  -9    0.70    6.50
  -8  -1   9   -9.60   13.00
   1   8  -9    3.30    6.70
   3   8  -9    4.50    6.70
  -4   9  -9   -8.30    6.00
  -9  -4   9    5.00   14.20
  -2   9  -9   -1.40    6.60
  -9  -2   9   14.10   14.40
   0   9  -9    5.10    6.90
  -9   0   9   15.50   13.90
   2   9  -9   -5.10    6.30
  -9   2   9    3.70   13.00

_computing_structure_solution     'SHELXT 2014/4 (Sheldrick, 2014)'
_computing_structure_solution     'SHELXT 2014/4 (Sheldrick, 2014)'
;
_shelx_hkl_checksum                77023
_olex2_submission_special_instructions  'No special instructions were received'
