# Supplementary material for: Various Approaches to Studying the Phase Transition in an Octamethylcyclotetrasiloxane Crystal: From X-ray Structural Analysis to Metadynamics
Source: Int J Mol Sci. 2022 Aug 13;23(16):9073. doi: 10.3390/ijms23169073 (PMC9408834; doi:10.3390/ijms23169073)
Supplement: Supplementary file 1 [file ijms-23-09073-s001.zip › 230.cif]

data_230
_audit_creation_date               2022-06-29
_audit_creation_method
;
Olex2 1.5
(compiled 2022.04.07 svn.rca3783a0 for OlexSys, GUI svn.r6498)
;
_shelxl_version_number             2014/6
_audit_contact_author_address      ?
_audit_contact_author_email        ?
_audit_contact_author_name         ''
_audit_contact_author_phone        ?
_publ_contact_author_id_orcid      ?
_publ_section_references
;
Dolomanov, O.V., Bourhis, L.J., Gildea, R.J, Howard, J.A.K. & Puschmann, H.
 (2009), J. Appl. Cryst. 42, 339-341.

Sheldrick, G.M. (2015). Acta Cryst. A71, 3-8.

Sheldrick, G.M. (2015). Acta Cryst. C71, 3-8.
;
_chemical_name_common              ?
_chemical_name_systematic          ?
_chemical_formula_moiety           'C8 H24 O4 Si4'
_chemical_formula_sum              'C8 H24 O4 Si4'
_chemical_formula_weight           296.63
_chemical_melting_point            ?
loop_
  _atom_type_symbol
  _atom_type_description
  _atom_type_scat_dispersion_real
  _atom_type_scat_dispersion_imag
  _atom_type_scat_source
 'C' 'C' 0.0033 0.0016 'International Tables Vol C Tables 4.2.6.8 and 6.1.1.4'
 'H' 'H' 0.0000 0.0000 'International Tables Vol C Tables 4.2.6.8 and 6.1.1.4'
 'O' 'O' 0.0106 0.0060 'International Tables Vol C Tables 4.2.6.8 and 6.1.1.4'
 'Si' 'Si' 0.0817 0.0704 'International Tables Vol C Tables 4.2.6.8 and 6.1.1.4'

_shelx_space_group_comment
;
The symmetry employed for this shelxl refinement is uniquely defined
by the following loop, which should always be used as a source of
symmetry information in preference to the above space-group names.
They are only intended as comments.
;
_space_group_crystal_system        'tetragonal'
_space_group_IT_number             86
_space_group_name_H-M_alt          'P 42/n'
_space_group_name_Hall             '-P 4bc'
loop_
  _space_group_symop_operation_xyz
 'x, y, z'
 '-x+1/2, -y+1/2, z'
 '-y, x+1/2, z+1/2'
 'y+1/2, -x, z+1/2'
 '-x, -y, -z'
 'x-1/2, y-1/2, -z'
 'y, -x-1/2, -z-1/2'
 '-y-1/2, x, -z-1/2'

_cell_length_a                     16.083(3)
_cell_length_b                     16.083(3)
_cell_length_c                     6.517(3)
_cell_angle_alpha                  90
_cell_angle_beta                   90
_cell_angle_gamma                  90
_cell_volume                       1685.7(10)
_cell_formula_units_Z              4
_cell_measurement_reflns_used      2516
_cell_measurement_temperature      230
_cell_measurement_theta_max        29.609
_cell_measurement_theta_min        2.533
_shelx_estimated_absorpt_T_max     0.902
_shelx_estimated_absorpt_T_min     0.844
_exptl_absorpt_coefficient_mu      0.350
_exptl_absorpt_correction_T_max    0.7461
_exptl_absorpt_correction_T_min    0.5265
_exptl_absorpt_correction_type     multi-scan
_exptl_absorpt_process_details
;
SADABS-2014/5 (Bruker,2014/5) was used for absorption correction.
wR2(int) was 0.1651 before and 0.0819 after correction.
The Ratio of minimum to maximum transmission is 0.7057.
The \l/2 correction factor is 0.00150.
;
_exptl_absorpt_special_details     ?
_exptl_crystal_colour              colourless
_exptl_crystal_colour_primary      colourless
_exptl_crystal_density_diffrn      1.169
_exptl_crystal_density_meas        .
_exptl_crystal_density_method      ?
_exptl_crystal_description         irregular
_exptl_crystal_F_000               640
_exptl_crystal_recrystallization_method  'in situ, in 0.3 mm capillary'
_exptl_crystal_size_max            0.5
_exptl_crystal_size_mid            0.3
_exptl_crystal_size_min            0.3
_exptl_transmission_factor_max     ?
_exptl_transmission_factor_min     ?
_diffrn_reflns_av_R_equivalents    0.0734
_diffrn_reflns_av_unetI/netI       0.0927
_diffrn_reflns_Laue_measured_fraction_full  0.978
_diffrn_reflns_Laue_measured_fraction_max  0.983
_diffrn_reflns_limit_h_max         23
_diffrn_reflns_limit_h_min         -15
_diffrn_reflns_limit_k_max         19
_diffrn_reflns_limit_k_min         -20
_diffrn_reflns_limit_l_max         8
_diffrn_reflns_limit_l_min         -9
_diffrn_reflns_number              9559
_diffrn_reflns_point_group_measured_fraction_full  0.978
_diffrn_reflns_point_group_measured_fraction_max  0.983
_diffrn_reflns_theta_full          25.242
_diffrn_reflns_theta_max           30.590
_diffrn_reflns_theta_min           1.791
_diffrn_ambient_temperature        230
_diffrn_detector                   'CCD area detector'
_diffrn_detector_area_resol_mean   8
_diffrn_detector_type              'Bruker SMART CCD 1K area detector'
_diffrn_measured_fraction_theta_full  0.978
_diffrn_measured_fraction_theta_max  0.983
_diffrn_measurement_device         'three-circle diffractometer'
_diffrn_measurement_device_type    'Bruker APEX-II CCD'
_diffrn_measurement_method         '\w and \f scans'
_diffrn_radiation_monochromator    graphite
_diffrn_radiation_probe            x-ray
_diffrn_radiation_type             MoK\a
_diffrn_radiation_wavelength       0.71073
_diffrn_source                     'sealed tube'
_diffrn_source_current             30.0
_diffrn_source_power               1.5
_diffrn_source_target              Mo
_diffrn_source_voltage             50.0
_diffrn_special_details            ?
_reflns_Friedel_coverage           0.000
_reflns_Friedel_fraction_full      .
_reflns_Friedel_fraction_max       .
_reflns_number_gt                  1230
_reflns_number_total               2557
_reflns_special_details
;
 Reflections were merged by SHELXL according to the crystal
 class for the calculation of statistics and refinement.
 
 _reflns_Friedel_fraction is defined as the number of unique
 Friedel pairs measured divided by the number that would be
 possible theoretically, ignoring centric projections and
 systematic absences.
;
_reflns_threshold_expression       'I > 2\s(I)'
_computing_cell_refinement         'SAINT v8.34A (Bruker, 2013)'
_computing_data_collection         ?
_computing_data_reduction          'SAINT v8.34A (Bruker, 2013)'
_computing_molecular_graphics      'Olex2 1.5 (Dolomanov et al., 2009)'
_computing_publication_material    'Olex2 1.5 (Dolomanov et al., 2009)'
_computing_structure_refinement    'SHELXL 2014/6 (Sheldrick, 2015)'
_computing_structure_solution      'SHELXT 2014/4 (Sheldrick, 2014)'
_refine_diff_density_max           0.512
_refine_diff_density_min           -0.344
_refine_diff_density_rms           0.090
_refine_ls_extinction_coef         .
_refine_ls_extinction_method       none
_refine_ls_goodness_of_fit_ref     1.066
_refine_ls_hydrogen_treatment      constr
_refine_ls_matrix_type             full
_refine_ls_number_parameters       77
_refine_ls_number_reflns           2557
_refine_ls_number_restraints       0
_refine_ls_R_factor_all            0.1661
_refine_ls_R_factor_gt             0.0883
_refine_ls_restrained_S_all        1.066
_refine_ls_shift/su_max            0.000
_refine_ls_shift/su_mean           0.000
_refine_ls_structure_factor_coef   Fsqd
_refine_ls_weighting_details      
 'w=1/[\s^2^(Fo^2^)+(0.0331P)^2^+10.2365P] where P=(Fo^2^+2Fc^2^)/3'
_refine_ls_weighting_scheme        calc
_refine_ls_wR_factor_gt            0.2142
_refine_ls_wR_factor_ref           0.2423
_refine_special_details            ?
_olex2_refinement_description
;
1. Fixed Uiso
 At 1.5 times of:
  All C(H,H,H) groups
2.a Idealised Me refined as rotating group:
 C1(H1A,H1B,H1C), C2(H2A,H2B,H2C), C3(H3A,H3B,H3C), C4(H4A,H4B,H4C)
;
_atom_sites_solution_hydrogens     geom
_atom_sites_solution_primary       dual
_atom_sites_solution_secondary     ?
loop_
  _atom_site_label
  _atom_site_type_symbol
  _atom_site_fract_x
  _atom_site_fract_y
  _atom_site_fract_z
  _atom_site_U_iso_or_equiv
  _atom_site_adp_type
  _atom_site_occupancy
  _atom_site_site_symmetry_order
  _atom_site_calc_flag
  _atom_site_refinement_flags_posn
  _atom_site_refinement_flags_adp
  _atom_site_refinement_flags_occupancy
  _atom_site_disorder_assembly
  _atom_site_disorder_group
 Si1 Si 0.43239(9) 0.88513(9) 0.4894(3) 0.0345(4) Uani 1 1 d . . . . .
 Si2 Si 0.61148(9) 0.93608(9) 0.3606(3) 0.0371(4) Uani 1 1 d . . . . .
 O1 O 0.3889(2) 0.9758(2) 0.5165(7) 0.0460(12) Uani 1 1 d . . . . .
 O2 O 0.5189(2) 0.8963(3) 0.3631(8) 0.0500(12) Uani 1 1 d . . . . .
 C1 C 0.3627(4) 0.8196(4) 0.3315(12) 0.0495(17) Uani 1 1 d . . . . .
 H1A H 0.3122 0.8079 0.4075 0.074 Uiso 1 1 calc R U . . .
 H1B H 0.3905 0.7678 0.2985 0.074 Uiso 1 1 calc R U . . .
 H1C H 0.3489 0.8487 0.2057 0.074 Uiso 1 1 calc R U . . .
 C2 C 0.4538(5) 0.8396(4) 0.7457(12) 0.0590(19) Uani 1 1 d . . . . .
 H2A H 0.4906 0.8761 0.8216 0.089 Uiso 1 1 calc R U . . .
 H2B H 0.4799 0.7857 0.7292 0.089 Uiso 1 1 calc R U . . .
 H2C H 0.4020 0.8332 0.8203 0.089 Uiso 1 1 calc R U . . .
 C3 C 0.6853(5) 0.8660(5) 0.4929(14) 0.069(2) Uani 1 1 d . . . . .
 H3A H 0.7398 0.8918 0.4979 0.103 Uiso 1 1 calc R U . . .
 H3B H 0.6890 0.8138 0.4187 0.103 Uiso 1 1 calc R U . . .
 H3C H 0.6659 0.8555 0.6315 0.103 Uiso 1 1 calc R U . . .
 C4 C 0.6412(5) 0.9515(5) 0.0881(12) 0.065(2) Uani 1 1 d . . . . .
 H4A H 0.6018 0.9888 0.0229 0.098 Uiso 1 1 calc R U . . .
 H4B H 0.6408 0.8983 0.0177 0.098 Uiso 1 1 calc R U . . .
 H4C H 0.6965 0.9754 0.0812 0.098 Uiso 1 1 calc R U . . .

loop_
  _atom_site_aniso_label
  _atom_site_aniso_U_11
  _atom_site_aniso_U_22
  _atom_site_aniso_U_33
  _atom_site_aniso_U_23
  _atom_site_aniso_U_13
  _atom_site_aniso_U_12
 Si1 0.0288(8) 0.0282(8) 0.0465(10) -0.0070(7) 0.0041(7) -0.0056(6)
 Si2 0.0284(8) 0.0316(8) 0.0515(10) -0.0102(8) 0.0086(7) -0.0025(6)
 O1 0.040(2) 0.034(2) 0.064(3) -0.015(2) 0.002(2) 0.0009(16)
 O2 0.037(2) 0.045(2) 0.068(3) -0.014(2) 0.016(2) -0.0083(17)
 C1 0.040(3) 0.042(3) 0.066(5) -0.013(3) -0.006(3) -0.008(2)
 C2 0.077(5) 0.048(4) 0.052(5) 0.000(3) 0.002(4) 0.001(3)
 C3 0.058(4) 0.058(4) 0.090(7) -0.022(4) -0.011(4) 0.020(3)
 C4 0.071(5) 0.070(5) 0.055(5) -0.018(4) 0.026(4) -0.020(4)

_geom_special_details
;
 All esds (except the esd in the dihedral angle between two l.s. planes)
 are estimated using the full covariance matrix.  The cell esds are taken
 into account individually in the estimation of esds in distances, angles
 and torsion angles; correlations between esds in cell parameters are only
 used when they are defined by crystal symmetry.  An approximate (isotropic)
 treatment of cell esds is used for estimating esds involving l.s. planes.
;
loop_
  _geom_bond_atom_site_label_1
  _geom_bond_atom_site_label_2
  _geom_bond_distance
  _geom_bond_site_symmetry_2
  _geom_bond_publ_flag
 Si1 O1 1.627(4) . ?
 Si1 O2 1.626(4) . ?
 Si1 C1 1.851(6) . ?
 Si1 C2 1.856(8) . ?
 Si2 O1 1.627(4) 5_676 ?
 Si2 O2 1.621(4) . ?
 Si2 C3 1.851(7) . ?
 Si2 C4 1.856(8) . ?
 O1 Si2 1.627(4) 5_676 ?
 C1 H1A 0.9700 . ?
 C1 H1B 0.9700 . ?
 C1 H1C 0.9700 . ?
 C2 H2A 0.9700 . ?
 C2 H2B 0.9700 . ?
 C2 H2C 0.9700 . ?
 C3 H3A 0.9700 . ?
 C3 H3B 0.9700 . ?
 C3 H3C 0.9700 . ?
 C4 H4A 0.9700 . ?
 C4 H4B 0.9700 . ?
 C4 H4C 0.9700 . ?

loop_
  _geom_angle_atom_site_label_1
  _geom_angle_atom_site_label_2
  _geom_angle_atom_site_label_3
  _geom_angle
  _geom_angle_site_symmetry_1
  _geom_angle_site_symmetry_3
  _geom_angle_publ_flag
 O1 Si1 C1 108.1(3) . . ?
 O1 Si1 C2 109.6(3) . . ?
 O2 Si1 O1 108.9(2) . . ?
 O2 Si1 C1 107.4(3) . . ?
 O2 Si1 C2 109.9(3) . . ?
 C1 Si1 C2 112.8(3) . . ?
 O1 Si2 C3 107.7(3) 5_676 . ?
 O1 Si2 C4 110.8(3) 5_676 . ?
 O2 Si2 O1 109.6(2) . 5_676 ?
 O2 Si2 C3 110.1(3) . . ?
 O2 Si2 C4 107.4(3) . . ?
 C3 Si2 C4 111.2(4) . . ?
 Si2 O1 Si1 146.7(3) 5_676 . ?
 Si2 O2 Si1 146.6(3) . . ?
 Si1 C1 H1A 109.5 . . ?
 Si1 C1 H1B 109.5 . . ?
 Si1 C1 H1C 109.5 . . ?
 H1A C1 H1B 109.5 . . ?
 H1A C1 H1C 109.5 . . ?
 H1B C1 H1C 109.5 . . ?
 Si1 C2 H2A 109.5 . . ?
 Si1 C2 H2B 109.5 . . ?
 Si1 C2 H2C 109.5 . . ?
 H2A C2 H2B 109.5 . . ?
 H2A C2 H2C 109.5 . . ?
 H2B C2 H2C 109.5 . . ?
 Si2 C3 H3A 109.5 . . ?
 Si2 C3 H3B 109.5 . . ?
 Si2 C3 H3C 109.5 . . ?
 H3A C3 H3B 109.5 . . ?
 H3A C3 H3C 109.5 . . ?
 H3B C3 H3C 109.5 . . ?
 Si2 C4 H4A 109.5 . . ?
 Si2 C4 H4B 109.5 . . ?
 Si2 C4 H4C 109.5 . . ?
 H4A C4 H4B 109.5 . . ?
 H4A C4 H4C 109.5 . . ?
 H4B C4 H4C 109.5 . . ?

loop_
  _geom_torsion_atom_site_label_1
  _geom_torsion_atom_site_label_2
  _geom_torsion_atom_site_label_3
  _geom_torsion_atom_site_label_4
  _geom_torsion
  _geom_torsion_site_symmetry_1
  _geom_torsion_site_symmetry_2
  _geom_torsion_site_symmetry_3
  _geom_torsion_site_symmetry_4
  _geom_torsion_publ_flag
 O1 Si1 O2 Si2 64.0(6) . . . . ?
 O1 Si2 O2 Si1 -32.8(7) 5_676 . . . ?
 O2 Si1 O1 Si2 -77.4(6) . . . 5_676 ?
 C1 Si1 O1 Si2 166.2(6) . . . 5_676 ?
 C1 Si1 O2 Si2 -179.1(6) . . . . ?
 C2 Si1 O1 Si2 42.9(6) . . . 5_676 ?
 C2 Si1 O2 Si2 -56.0(6) . . . . ?
 C3 Si2 O2 Si1 85.4(6) . . . . ?
 C4 Si2 O2 Si1 -153.3(6) . . . . ?

_shelx_res_file
;
TITL 200_a.res in P4(2)/n
REM Old TITL 200 in P4(2)/n
REM SHELXT solution in P4(2)/n
REM R1 0.156, Rweak 0.004, Alpha 0.023, Orientation as input
REM Formula found by SHELXT: C2 O Si
CELL 0.71073 16.083 16.083 6.5169 90 90 90
ZERR 4 0.003 0.003 0.0028 0 0 0
LATT 1
SYMM 0.5-X,0.5-Y,+Z
SYMM -Y,0.5+X,0.5+Z
SYMM 0.5+Y,-X,0.5+Z
SFAC C H O Si
UNIT 32 96 16 16

L.S. 4
PLAN  5
SIZE 0.3 0.3 0.5
TEMP -43.15
CONF
BOND $H
list 4
MORE -1
fmap 2
acta
OMIT 2 7 1
REM <olex2.extras>
REM <HklSrc "%.\\230.hkl">
REM </olex2.extras>

WGHT    0.033100   10.236499
FVAR       0.46171
SI1   4    0.432394    0.885134    0.489407    11.00000    0.02880    0.02824 =
         0.04645   -0.00700    0.00406   -0.00561
SI2   4    0.611480    0.936076    0.360565    11.00000    0.02839    0.03156 =
         0.05148   -0.01025    0.00861   -0.00252
O1    3    0.388946    0.975849    0.516547    11.00000    0.04005    0.03437 =
         0.06369   -0.01481    0.00166    0.00094
O2    3    0.518892    0.896278    0.363096    11.00000    0.03668    0.04529 =
         0.06811   -0.01435    0.01634   -0.00830
C1    1    0.362714    0.819570    0.331464    11.00000    0.03999    0.04224 =
         0.06617   -0.01261   -0.00584   -0.00847
AFIX 137
H1A   2    0.312197    0.807891    0.407494    11.00000   -1.50000
H1B   2    0.390539    0.767758    0.298458    11.00000   -1.50000
H1C   2    0.348898    0.848709    0.205684    11.00000   -1.50000
AFIX   0
C2    1    0.453794    0.839597    0.745698    11.00000    0.07703    0.04787 =
         0.05216   -0.00014    0.00222    0.00065
AFIX 137
H2A   2    0.490646    0.876114    0.821604    11.00000   -1.50000
H2B   2    0.479931    0.785657    0.729167    11.00000   -1.50000
H2C   2    0.401989    0.833220    0.820274    11.00000   -1.50000
AFIX   0
C3    1    0.685320    0.865959    0.492890    11.00000    0.05783    0.05828 =
         0.08968   -0.02175   -0.01080    0.02000
AFIX 137
H3A   2    0.739761    0.891837    0.497870    11.00000   -1.50000
H3B   2    0.688955    0.813801    0.418694    11.00000   -1.50000
H3C   2    0.665942    0.855491    0.631454    11.00000   -1.50000
AFIX   0
C4    1    0.641194    0.951484    0.088076    11.00000    0.07075    0.07014 =
         0.05462   -0.01804    0.02619   -0.01958
AFIX 137
H4A   2    0.601813    0.988761    0.022915    11.00000   -1.50000
H4B   2    0.640810    0.898346    0.017676    11.00000   -1.50000
H4C   2    0.696491    0.975400    0.081194    11.00000   -1.50000
AFIX   0
HKLF 4

REM  200_a.res in P4(2)/n
REM R1 =  0.0883 for    1230 Fo > 4sig(Fo)  and  0.1661 for all    2557 data
REM     77 parameters refined using      0 restraints

END

WGHT      0.0331     10.2365

REM Highest difference peak  0.512,  deepest hole -0.344,  1-sigma level  0.090
Q1    1   0.6183  0.9344  0.2128  11.00000  0.05    0.51
Q2    1   0.6096  0.9436  0.5070  11.00000  0.05    0.44
Q3    1   0.5566  0.9428  0.3488  11.00000  0.05    0.40
Q4    1   0.5328  0.8892  0.4921  11.00000  0.05    0.40
Q5    1   0.4360  0.8853  0.3413  11.00000  0.05    0.40
;
_shelx_res_checksum                3706
_shelx_hkl_file
;
   0   1   0   -4.10    0.30
   0  -1   0   -4.10    0.30
  -1  -1   0    3.80    0.90
  -1   1   0    4.80    0.90
  -1   1   0    3.00    0.40
  -1  -1   0    3.30    0.50
   1  -2   0   -3.30    1.40
  -2  -1   0   -5.50    1.70
  -2  -1   0   -7.50    1.20
   1  -2   0   -3.40    1.80
   2   1   0   -7.10    1.80
  -1   2   0   -6.80    1.50
   0  -2   0 4266.97  256.67
  -2   0   0 3977.10  259.17
  -2   0   0 4451.15  257.77
   0  -2   0 3890.51  259.37
   2   0   0 4042.90  257.07
   0   2   0 3300.07  256.57
   2   0   0 4113.79  259.77
   2  -2   0  156.58   10.90
   2   2   0  149.88   11.10
   2   2   0  143.59   10.20
  -2   2   0  156.68   10.90
   2  -2   0  151.88   10.20
  -2  -2   0  151.48   11.20
   3   2   0   -1.00    1.50
   2  -3   0   -0.40    1.00
   2  -3   0   -0.80    1.60
   3   2   0   -0.60    0.80
  -2   3   0   -1.70    1.60
  -3  -2   0   -1.70    1.50
  -1   3   0    0.60    0.70
   3   1   0    0.70    1.50
   1  -3   0    1.50    1.00
  -3  -1   0    0.30    1.40
   1  -3   0    1.80    1.70
   3   1   0    2.10    0.90
  -1   3   0    0.60    1.50
   0  -3   0   -1.10    0.80
   0  -3   0    2.10    1.30
   0   3   0    1.40    1.00
   0   3   0   -0.60    0.80
   3   0   0   -0.10    0.40
   3   0   0    0.20    1.00
  -3   0   0    0.20    1.30
   3  -1   0   -0.70    0.50
  -1  -3   0    0.10    1.00
   3  -1   0   -0.10    1.30
  -1  -3   0    0.20    1.40
   1   3   0    0.80    0.70
  -3   1   0    0.50    1.40
  -2  -3   0  131.69   10.30
  -4  -3   0    5.60    2.70
   4   3   0   -1.10    1.10
  -3   4   0   -2.80    2.40
   4   3   0   -0.80    2.10
   3  -4   0   -1.40    2.30
   3  -4   0   -2.50    1.30
   2  -4   0 9999.00  634.04
   4   2   0 9919.11  637.44
   2  -4   0 9904.81  630.34
  -2   4   0 9793.22  635.34
   4   2   0 9743.12  631.04
  -4  -2   0 9757.62  637.04
   1  -4   0   37.50    5.50
   0  -4   0 5504.25  360.06
   4   0   0 5359.96  360.86
   0   4   0 6225.08  360.46
   4   0   0 5654.33  364.96
  -4   0   0 5413.46  364.46
  -1  -4   0   26.90    5.00
  -2  -4   0  287.57   21.60
  -4   2   0  303.77   21.30
   4  -2   0  308.67   19.70
   2   4   0  302.67   21.50
   2   4   0  297.07   19.70
   4  -2   0  282.57   21.00
   4  -3   0   -4.70    2.50
  -4   3   0   -3.00    2.90
  -3  -4   0   -0.90    2.00
   4  -3   0    0.60    1.30
   3   4   0    0.10    1.10
   3   4   0   -0.80    2.00
  -4  -4   0 1137.89   77.59
  -4   4   0 1252.77   77.09
   4  -4   0 1161.58   76.79
   4   4   0 1163.68   77.59
   4   4   0 1119.59   75.59
   4  -4   0 1201.78   75.79
   3  -5   0   13.70    2.60
   3  -5   0    9.40    3.60
   5   3   0   12.50    2.10
  -5  -3   0   10.40    3.50
  -3   5   0   13.80    3.70
   5   3   0    6.30    3.40
  -2   5   0   -3.00    2.60
   2  -5   0   -3.00    1.50
   5   2   0   -0.70    1.30
   2  -5   0   -3.30    2.70
  -5  -2   0   -4.90    2.40
   5   2   0   -2.90    2.30
  -1   5   0    3.50    3.00
   1  -5   0   10.40    2.30
  -5  -1   0   12.70    3.40
   5   1   0    9.60    1.90
   1  -5   0    7.80    3.30
   5   1   0    9.70    3.70
   0  -5   0    2.40    1.70
   5   0   0    0.40    1.00
   0  -5   0    6.70    3.30
   0   5   0    3.00    2.30
  -5   0   0    3.30    2.90
   5   0   0    2.30    2.60
  -1  -5   0   33.10    6.20
  -1  -5   0   30.60    4.40
   5  -1   0   49.70    7.20
   5  -1   0   30.80    3.30
  -5   1   0   32.70    4.90
   3   5   0   95.49    8.90
  -3  -5   0   89.29    9.00
   5  -3   0   73.19    6.50
  -5   3   0   85.29    8.90
  -4  -5   0    0.20    2.50
  -5   4   0   -3.10    2.70
   4   5   0    0.20    2.20
   5  -4   0   -1.90    2.70
   5  -4   0    1.00    1.40
   5  -5   0   10.60    2.40
  -5  -5   0   13.10    4.40
   5   5   0    6.20    3.50
  -5   5   0    7.80    4.20
   5  -5   0   11.30    3.90
   5   5   0    9.30    2.00
  -5   6   0   -2.60    3.10
   6   5   0    6.70    3.20
   5  -6   0    2.00    2.80
   5  -6   0   -1.40    2.00
  -6  -5   0    3.10    2.90
   4  -6   0 1126.79   74.39
  -4   6   0 1137.39   74.59
   6   4   0 1098.29   72.89
   4  -6   0 1145.39   73.09
  -6  -4   0 1127.09   75.29
   6   4   0 1135.29   75.49
   6   3   0   -1.20    1.30
  -6  -3   0   -0.50    2.60
   3  -6   0    0.50    2.50
  -3   6   0   -1.30    2.50
   3  -6   0   -0.70    1.70
   6   3   0   -1.50    2.30
   6   2   0 1755.52  110.19
  -2   6   0 1601.44  111.99
  -6  -2   0 1707.73  111.89
   2  -6   0 1732.63  111.49
   2  -6   0 1769.72  110.39
   6   2   0 1715.83  112.09
  -1   6   0   -5.20    2.40
  -6  -1   0   -5.70    2.30
   1  -6   0   -5.30    2.60
   6   1   0   -0.50    1.20
   1  -6   0   -5.00    1.80
   6   1   0    0.80    3.00
   6  -1   0   -1.80    1.30
  -6   1   0   -1.00    3.20
   6  -1   0    6.90    3.60
  -1  -6   0   -6.50    3.60
  -1  -6   0   -1.70    2.30
  -1  -6   0   -5.10    2.80
   6  -2   0    2.70    3.20
  -2  -6   0    7.40    4.40
  -6   2   0   -0.50    3.30
   6  -3   0    7.10    1.70
  -3  -6   0    1.00    3.50
   3   6   0   -1.20    2.30
  -6   3   0   -2.60    3.30
   3   6   0   -1.10    1.30
   6  -3   0    1.60    2.70
   6  -4   0  940.51   57.69
   4   6   0  790.02   57.89
   6  -4   0  861.31   55.89
  -6   4   0  980.40   57.69
   4   6   0  789.92   55.59
  -4  -6   0  783.82   57.89
  -5  -6   0    0.70    3.10
   6  -5   0   -3.10    1.70
   6  -5   0   -1.70    3.20
   5   6   0   -2.30    1.60
   5   6   0   -0.70    2.50
  -6   5   0   -1.40    3.20
   6  -6   0  114.39   11.30
  -6   6   0   90.79   11.50
   6   6   0  106.69    8.30
  -6  -6   0  113.99   12.10
   6  -6   0  118.69    9.00
   6   6   0  106.59   11.20
   6  -7   0   -6.40    3.40
   7   6   0    1.30    1.80
  -7  -6   0   -0.90    3.30
   6  -7   0   -1.20    2.30
   7   6   0   -0.10    3.00
   7   5   0   -1.90    2.90
   5  -7   0   -3.30    2.30
  -5   7   0   -5.20    3.50
   5  -7   0    1.00    3.20
  -7  -5   0    0.00    3.30
   7   5   0    0.80    1.70
  -4   7   0   -1.80    3.20
  -7  -4   0   -0.20    3.50
   4  -7   0   -1.70    2.30
   7   4   0   -0.60    1.50
   7   4   0    0.20    2.90
   4  -7   0   -0.90    2.70
   3  -7   0    7.80    3.00
   7   3   0   20.10    4.80
   7   3   0   14.60    2.50
  -3   7   0   15.80    4.60
   2  -7   0   11.20    4.00
  -7  -1   0    1.70    2.90
   1  -7   0   -1.60    2.80
   7   1   0    2.30    3.20
   1  -7   0    2.10    2.20
  -1   7   0   -1.10    2.40
   7   1   0    2.10    1.40
   0  -7   0   54.89    8.00
  -1  -7   0   24.20    3.90
  -1  -7   0   32.40    6.30
   7  -1   0   24.50    5.30
  -7   1   0   28.00    5.40
   7  -1   0   20.00    2.90
   7  -2   0    0.90    4.10
  -2  -7   0   -0.30    3.90
  -2  -7   0   -1.00    3.00
   7  -2   0   -1.30    1.40
  -2  -7   0   -0.30    2.90
  -7   2   0   -2.90    3.40
   7  -3   0    2.90    1.90
   3   7   0    5.30    1.80
  -3  -7   0    3.40    3.30
   7  -3   0   10.80    4.20
  -7   3   0    0.30    3.70
  -3  -7   0    1.50    4.90
   5   7   0    4.00    2.10
   7  -5   0    0.30    3.90
   7  -5   0    1.00    2.20
  -5  -7   0    3.70    3.90
  -7   5   0   -0.30    3.80
   5   7   0    1.40    3.50
  -7   6   0   -1.20    4.00
  -6  -7   0   -0.70    4.00
   7  -6   0   -4.50    2.00
   6   7   0    0.10    3.10
   7  -6   0   -1.60    4.10
  -7   7   0   36.20    7.30
   7   7   0   34.50    4.90
   7  -7   0   43.30    7.50
   7   7   0   31.30    7.20
  -7  -7   0   33.70    7.30
   7  -7   0   39.50    5.10
   8   7   0   -0.50    2.20
   7  -8   0    3.80    3.30
  -8  -7   0   -2.20    4.20
   8   7   0    0.00    3.70
   7  -8   0    1.20    4.40
  -7   8   0   -4.10    4.20
   8   6   0  307.47   24.90
  -8  -6   0  303.17   25.10
   6  -8   0  337.97   22.20
   6  -8   0  299.57   24.00
  -6   8   0  305.17   24.40
   8   6   0  314.67   21.50
   8   5   0   -3.50    2.00
  -5   8   0   -7.00    3.90
  -8  -5   0    1.10    4.50
   5  -8   0   -2.80    3.70
   8   5   0   -2.20    3.40
   4  -8   0 1686.63  108.59
   8   4   0 1639.84  111.19
  -4   8   0 1706.83  110.89
   4  -8   0 1661.23  110.09
  -8  -4   0 1718.43  111.19
   8   4   0 1657.43  108.19
  -8  -3   0    1.70    3.60
   3  -8   0   -2.40    2.30
   8   3   0   -1.30    2.80
   3  -8   0   -2.40    3.30
   8   3   0   -0.10    1.70
  -3   8   0   -1.40    4.00
   2  -8   0  897.21   58.09
   8   2   0  865.51   55.99
   2  -8   0  847.12   56.29
  -8  -2   0  842.52   58.29
   8   2   0  840.52   58.49
   1  -8   0   -1.40    3.40
  -8  -1   0   -1.00    4.20
   8   1   0   -1.30    3.20
   1  -8   0   -2.30    2.10
   8   1   0   -1.70    1.30
  -1   8   0   -0.60    2.60
   0  -8   0   85.59    7.70
   8   0   0   79.99   10.10
   8   0   0   80.09    6.60
  -8   0   0   76.09   10.50
  -1  -8   0   -1.80    3.90
   8  -1   0   -2.70    3.10
  -1  -8   0   -3.80    3.40
  -1  -8   0   -2.10    2.80
   8  -1   0   -0.30    1.50
  -2  -8   0  252.57   18.40
   8  -2   0  259.07   21.40
   8  -2   0  260.07   17.60
  -8   2   0  270.37   20.10
  -2  -8   0  225.08   20.70
   4   8   0  851.11   54.89
   8  -4   0  842.02   57.39
   8  -4   0  835.62   55.19
  -4  -8   0  844.82   58.29
  -8   4   0  839.42   56.99
   5   8   0   -0.80    2.00
   5   8   0    0.10    3.60
   8  -5   0   -2.40    2.20
  -8   5   0   -3.10    3.70
   8  -5   0   -1.60    3.70
  -5  -8   0   -0.30    4.60
  -8   6   0    7.00    5.10
   6   8   0    9.70    2.90
   8  -6   0    6.40    5.40
  -6  -8   0   10.70    6.80
   6   8   0    8.90    5.00
   8  -6   0   10.50    3.40
  -7  -8   0   -2.60    5.20
   7   8   0    1.20    3.80
   8  -7   0   -8.00    5.20
   8  -7   0   -2.40    2.60
   7   8   0   -1.00    2.20
   8  -8   0 1732.43  104.69
  -8  -8   0 1529.85  104.79
   8   8   0 1456.45  104.39
  -8   8   0 1569.94  103.59
   8   8   0 1483.55  100.79
   8  -8   0 1581.64  101.49
   8  -9   0   -2.10    5.10
  -8   9   0   -4.00    5.20
   9   8   0   -4.70    3.20
   9   8   0    0.70    4.70
   8  -9   0   -5.20    4.10
  -9  -8   0    2.20    5.30
  -9  -7   0   31.70    8.80
   9   7   0   27.60    4.70
   9   7   0   24.90    7.30
   7  -9   0   36.50    7.00
   6  -9   0   -7.30    3.40
   9   6   0   -3.20    3.80
  -9  -6   0   -3.10    5.30
  -6   9   0   -9.90    4.80
   9   6   0    1.20    2.60
   6  -9   0   -6.40    3.80
  -5   9   0   17.20    6.70
   5  -9   0   15.60    5.40
   9   5   0   19.60    3.50
   5  -9   0   13.80    4.50
  -9  -5   0   24.70    7.10
   9   5   0   22.70    6.90
   9   4   0   -1.60    3.60
  -4   9   0    3.20    5.20
   4  -9   0   -1.60    3.70
   4  -9   0   -7.70    3.00
   9   4   0    3.90    2.20
  -9  -4   0   14.30    5.10
  -9  -3   0    6.00    4.40
   9   3   0    9.80    2.60
   3  -9   0   11.30    4.00
   3  -9   0    6.50    4.40
  -3   9   0    2.00    4.70
   9   3   0    7.40    4.10
   9   2   0    0.60    3.70
  -9  -2   0    1.00    3.70
   9   2   0   -0.40    1.80
   2  -9   0    3.60    4.90
  -2   9   0    3.60    3.80
   2  -9   0   -4.30    2.60
   1  -9   0   32.00    6.60
  -9  -1   0   48.40    8.90
   9   1   0   52.99    9.00
   1  -9   0   36.60    5.10
   9   1   0   33.80    4.40
   9  -1   0  392.76   32.10
  -1  -9   0  488.35   33.90
  -2  -9   0   -4.30    4.10
  -9   2   0    0.50    3.80
   9  -2   0    0.30    4.10
   9  -2   0   -0.70    2.10
  -2  -9   0   -4.60    3.80
  -2  -9   0   -1.00    4.30
   9  -3   0    9.00    2.70
  -3  -9   0    8.80    5.20
  -9   3   0    6.00    5.00
  -3  -9   0    3.80    6.80
   9  -3   0    4.70    6.10
   3   9   0    2.00    2.40
   9  -4   0   -1.20    4.00
  -4  -9   0    9.00    5.70
  -4  -9   0   12.70    5.30
   4   9   0    3.80    2.80
  -9   4   0   -1.90    4.00
   9  -5   0    5.20    3.20
   5   9   0   12.10    3.00
   9  -5   0    5.00    4.90
  -9   5   0    0.60    5.00
   9  -6   0   -1.30    2.80
   9  -6   0   -8.70    4.40
   6   9   0    1.50    4.40
  -9   6   0   -8.90    4.50
  -6  -9   0   -2.50    4.90
   6   9   0   -1.60    2.10
   9  -7   0    8.80    6.10
   7   9   0    6.90    5.60
   7   9   0    8.70    2.90
  -9   7   0   -4.40    5.40
   9  -7   0    0.00    3.40
  -7  -9   0    0.40    7.20
  -9   8   0  145.29   16.30
   9  -8   0  153.68   17.60
   9   9   0    1.00    4.90
  -9   9   0    2.40    6.20
   9  -9   0   -2.60    4.20
   9   9   0    2.90    3.30
  -9  -9   0    3.60    6.00
   9  -9   0    0.70    6.60
  10   9   0    5.80    5.50
   9 -10   0  -15.20    7.20
  -9  10   0   -3.30    6.10
 -10  -9   0   -1.50    5.80
   9 -10   0    2.80    4.50
  10   8   0 1086.79   78.39
   8 -10   0 1153.68   77.29
  -8  10   0 1133.69   77.59
  10   8   0 1136.19   73.99
   8 -10   0 1135.59   74.89
 -10  -8   0 1145.19   78.99
   7 -10   0   -0.20    4.90
 -10  -7   0   -4.30    6.50
  -7  10   0    7.30    6.10
  10   7   0   -0.80    4.80
  10   7   0   -0.80    2.90
  -6  10   0  452.85   33.60
   6 -10   0  419.46   32.50
  10   6   0  420.76   33.50
 -10  -6   0  422.16   34.30
  10   6   0  422.16   29.40
   6 -10   0  449.95   30.60
  -5  10   0   -4.70    6.20
 -10  -5   0   -7.40    5.60
   5 -10   0    3.40    3.80
  10   5   0   -4.30    4.40
   5 -10   0    1.10    4.70
  10   5   0    1.30    2.50
 -10  -4   0 2250.77  146.99
   4 -10   0 2192.68  145.99
  10   4   0 2328.17  143.69
  -4  10   0 2072.39  147.19
  10   4   0 2229.28  147.39
   4 -10   0 2298.77  144.19
   2 -10   0 2470.35  165.38
   2 -10   0 2504.15  167.28
  10   2   0 2582.64  165.08
  -2  10   0 2770.82  168.38
 -10  -2   0 2568.34  167.98
  10   2   0 2505.15  168.38
  -1  10   0    1.50    4.10
   1 -10   0    9.40    5.50
 -10  -1   0   -3.80    6.30
  10   0   0   34.30    7.80
 -10   0   0   45.50    8.80
  10   0   0   37.80    5.00
   0 -10   0   32.10    5.70
  -1 -10   0   -2.80    6.20
  -1 -10   0   -7.80    4.30
  10  -1   0   -2.00    4.70
 -10   1   0   -7.20    4.60
  -1 -10   0    6.40    6.10
  10  -1   0   -1.50    2.20
  10  -2   0  175.28   12.90
  10  -2   0  148.19   17.10
  -2 -10   0  217.58   18.80
 -10   2   0  149.39   16.00
  10  -3   0    2.20    2.90
  -3 -10   0    6.40    7.30
  -3 -10   0   -1.60    6.50
   3  10   0   -1.70    2.30
  10  -3   0   -0.80    7.00
 -10   3   0    1.60    4.70
   4  10   0  216.48   14.30
  -4 -10   0  190.48   17.80
  10  -4   0  172.38   18.40
 -10   4   0  178.48   17.30
   5  10   0    5.90    2.70
  10  -5   0    1.90    4.90
  -5 -10   0   -2.90    5.60
 -10   5   0   -3.10    4.60
  10  -5   0    3.50    3.20
  -5 -10   0   -0.70    5.60
 -10   6   0   54.99    9.70
   6  10   0   53.29    6.90
  10  -6   0   51.59    6.90
  10  -6   0   57.39   10.20
  -6 -10   0   46.00   11.00
  10  -8   0  103.99   13.60
   8  10   0   67.89   12.40
  10  -8   0   72.49    9.30
   8  10   0   73.79    8.10
 -10   8   0   75.79   12.00
  -8 -10   0   93.89   15.00
 -10   9   0   -2.90    6.00
  10  -9   0   -5.10    4.20
   9  10   0   -3.80    3.00
  10  -9   0   -2.00    6.70
   9  10   0   -0.10    5.60
  -9 -10   0   -0.20    5.60
  10  10   0   36.70    5.60
  10 -10   0   35.90    6.90
  10  10   0   30.50    8.50
 -10 -10   0   29.60    8.90
  11  10   0    4.10    3.20
  10 -11   0   -8.40    4.30
 -11  -9   0   16.30    8.60
  11   9   0   15.10    9.80
   9 -11   0   22.20    5.70
  11   9   0   20.90    4.40
   8 -11   0   -5.90    4.50
 -11  -8   0   14.40    7.40
  -8  11   0  -10.00    5.60
   8 -11   0   -7.60    5.30
  11   8   0   -4.10    3.20
  11   8   0   -1.90    5.00
  -7  11   0    5.40    7.00
   7 -11   0   -5.90    4.60
   7 -11   0    2.40    5.40
 -11  -7   0   -2.40    6.70
  11   7   0   -1.00    3.00
  11   7   0   -0.90    4.90
   6 -11   0   -1.60    4.30
  11   6   0   -2.80    2.90
  -6  11   0   -0.90    6.70
 -11  -6   0   -3.00    5.60
  11   6   0   -1.00    4.80
   6 -11   0   -1.40    4.50
  -5  11   0   30.70    9.20
  11   5   0   37.90    5.30
   5 -11   0   39.30    6.40
 -11  -5   0   35.10    8.70
  11   5   0   34.80    8.40
   5 -11   0   43.10    8.10
   4 -11   0   -5.50    4.50
  11   4   0    1.10    2.80
  -4  11   0   -2.50    5.50
  11   4   0   -2.80    5.20
   3 -11   0   -1.90    5.70
  -3  11   0   -3.50    4.90
  11   3   0    1.50    5.10
  11   3   0    1.80    2.80
 -11  -3   0    2.30    5.70
   3 -11   0    5.20    4.60
   1 -11   0   -2.30    4.90
 -11  -1   0   16.80    8.40
  11   1   0    8.30    6.50
   1 -11   0   10.90    6.20
  11   1   0   13.00    3.30
  -1  11   0    1.50    4.80
  11   0   0   -2.70    5.40
   0 -11   0   -6.00    5.30
 -11   0   0   -4.80    5.60
  11   0   0   -2.20    2.40
   0 -11   0   -6.70    4.30
  -1 -11   0  -12.60    4.80
  -1 -11   0   -9.00    5.90
 -11   1   0   13.80    5.70
  -1 -11   0   -4.50    5.60
  11  -1   0    2.70    5.10
  11  -1   0   -0.10    2.70
  -2 -11   0  210.58   22.20
  -3 -11   0    2.10    6.00
   3  11   0   13.20    3.30
  -3 -11   0    0.90    8.90
 -11   3   0    2.10    6.10
  11  -3   0   15.30    7.60
  11  -3   0    7.80    3.70
  11  -4   0   -7.00    8.30
  -4 -11   0   17.20    9.70
  11  -4   0   -4.20    3.40
  11  -5   0   60.09   10.70
 -11   5   0   48.20    9.10
  11  -5   0   42.40    6.70
 -11   7   0   19.20    7.10
   7  11   0   25.90    4.50
  -7 -11   0   12.50    8.40
  11  -7   0   21.70    8.00
   8  11   0    0.40    5.80
  11  -8   0   -1.40    6.30
  -8 -11   0   -3.30    7.40
   8  11   0    2.30    3.40
 -11   8   0    4.70    6.90
  11  -8   0    5.90    4.30
  10  11   0   -1.50    3.20
  11 -10   0   -0.20    4.20
  11  11   0    0.50    3.10
  11 -11   0    0.30    5.00
  11 -12   0   -0.90    5.00
  12  11   0   -1.50    3.30
  12  10   0   26.10    4.90
  10 -12   0   21.20    6.60
   9 -12   0    1.80    4.70
  12   9   0    2.20    3.30
   8 -12   0   -3.00    4.90
  12   8   0    8.20    3.60
 -12  -7   0    3.00    6.20
  12   7   0    1.80    5.20
  12   7   0   -3.00    3.10
   7 -12   0   -2.90    4.80
  -7  12   0   -1.10    6.80
   6 -12   0  281.47   23.40
  -6  12   0  233.18   24.80
  12   6   0  267.87   19.80
 -12  -6   0  293.07   25.90
  12   6   0  274.37   24.60
   6 -12   0  267.17   21.10
  12   5   0   -5.00    5.20
 -12  -5   0   -0.90    5.70
   5 -12   0   -3.70    4.50
   5 -12   0   -3.00    4.30
  -5  12   0    1.00    5.50
  12   5   0   -3.20    2.80
  12   4   0   91.19    8.60
  12   4   0   76.79   12.70
   4 -12   0   97.39   10.50
   4 -12   0   74.99   11.80
 -12  -4   0   76.29   14.00
  -3  12   0   -7.10    4.90
   3 -12   0    2.70    4.30
   3 -12   0   -7.90    5.60
  12   3   0   -3.50    5.00
  12   3   0    0.70    3.00
 -12  -3   0   -9.40    6.80
  12   2   0 1269.17   80.39
   2 -12   0 1223.68   80.89
 -12  -2   0 1248.78   84.69
   2 -12   0 1202.38   83.49
  12   2   0 1204.08   84.49
   1 -12   0   -3.60    6.50
  12   1   0    2.20    6.00
 -12  -1   0    2.50    8.60
  12   0   0  193.08   14.10
   0 -12   0  172.58   15.50
  12   0   0  169.88   20.20
 -12   0   0  168.48   19.70
   0 -12   0  180.58   19.00
  12  -1   0   -3.00    3.20
 -12   1   0   -6.20    5.90
  -1 -12   0   -3.60    6.90
  -1 -12   0    3.70    6.60
  -1 -12   0  -13.90    6.00
  12  -1   0   -1.10    6.20
  -2 -12   0 2276.27  149.39
  -2 -12   0 2426.16  153.98
  12  -2   0 2267.77  152.58
  12  -2   0 2279.37  148.89
  -2 -12   0 2293.57  152.88
 -12   2   0 2283.67  151.38
  12  -3   0    1.70    3.50
  12  -3   0   -4.50    6.10
  -3 -12   0   24.90    9.40
   3  12   0   11.30    3.30
 -12   4   0  274.87   24.30
   4  12   0  294.87   20.40
  12  -4   0  256.87   27.20
  -4 -12   0  299.87   30.10
  12  -4   0  297.37   21.30
 -12   5   0   -7.30    5.00
  -5 -12   0   11.20    8.50
   5  12   0    3.90    2.90
  12  -5   0   -6.90    3.30
  -5 -12   0   -6.60    6.30
  12  -6   0  532.15   36.40
  12  -6   0  488.65   40.20
  -6 -12   0  502.45   41.90
   6  12   0  501.55   35.20
  -6 -12   0  592.84   40.40
 -12   6   0  528.95   39.10
  12  -7   0    3.10    4.10
   7  12   0    3.20    3.10
  -7 -12   0   -9.20    6.30
  12  -8   0  877.11   58.59
  -8 -12   0  889.51   63.89
   8  12   0  845.32   57.29
  12  -9   0    2.40    4.70
   9  12   0   -0.10    3.40
  12 -10   0   53.39    8.70
  10  12   0   60.69    7.80
  11  12   0   -5.70    3.20
  12  12   0    4.60    4.00
  12 -12   0   11.70    6.40
  13  12   0   -3.70    3.70
  12 -13   0   -2.30    6.00
  11 -13   0   -1.30    5.60
  13  11   0    3.50    3.80
  13  10   0   -2.60    3.30
  10 -13   0   -0.80    5.30
   9 -13   0    6.10    5.80
  13   9   0   12.90    4.10
   8 -13   0  -11.10    4.70
  13   8   0   -7.90    3.20
  13   7   0   20.30    4.30
   7 -13   0    0.20    4.70
  13   6   0    3.30    3.30
   6 -13   0   -7.10    4.60
  13   5   0   11.20    4.00
  -5  13   0    2.00    6.10
 -13  -5   0   13.10    7.80
   5 -13   0   14.70    6.90
   5 -13   0    4.20    5.20
   4 -13   0    4.30    4.50
  13   4   0   -4.00    5.30
  -4  13   0   -1.80    5.00
   4 -13   0   -0.20    4.50
  13   4   0    1.10    3.10
 -13  -4   0   -7.00    5.40
   3 -13   0   20.60    5.70
 -13  -3   0   16.70    8.70
  13   3   0   14.70    6.80
   3 -13   0   17.00    7.50
  13   3   0   15.20    4.40
 -13  -2   0   -2.70   10.40
  13   2   0    1.40    5.20
  13   2   0   14.10    3.70
   1 -13   0   10.40    6.70
  13   1   0    6.30    6.70
   1 -13   0   22.90    5.60
 -13  -1   0   -4.20    6.50
  13   0   0   -4.50    3.40
 -13   0   0   -9.30    6.90
   0 -13   0    7.10    7.40
  13   0   0    7.90    7.50
   0 -13   0    4.30    6.10
   0 -13   0    6.10    6.00
  -1 -13   0   13.10    7.40
 -13   1   0   -6.40    6.80
  -1 -13   0    7.60    6.90
  13  -1   0   -2.30    6.50
  -1 -13   0    8.60    6.20
  13  -1   0    5.20    3.70
  -2 -13   0   20.00    9.00
  -2 -13   0   17.80    7.80
  13  -2   0   15.80    4.20
  13  -2   0    3.80    6.70
 -13   2   0    1.30    6.70
  -3 -13   0   14.60   10.00
 -13   3   0   -1.30    6.20
  13  -3   0   -1.40    7.10
 -13   4   0   -2.90    6.70
  13  -4   0   -5.80    6.60
  -4 -13   0   -3.40    6.40
   4  13   0    1.70    3.50
  -4 -13   0    8.50   10.80
  13  -4   0   10.30    4.30
   5  13   0   53.59    6.80
  -5 -13   0   70.79   14.00
  13  -5   0   52.79    7.60
   6  13   0    2.80    3.30
  13  -6   0   -3.30    3.90
  -6 -13   0   -0.30    7.00
   7  13   0   12.80    3.90
  13  -7   0   27.10    5.60
  -7 -13   0    8.10    7.80
   8  13   0   -1.90    3.60
  13  -8   0    0.80    4.60
  13  -9   0   11.10    5.70
   9  13   0   15.00    4.40
  13 -10   0    4.80    5.40
  10  13   0   -0.40    3.40
  13 -11   0   10.50    6.00
  11  13   0   12.20    4.30
  13 -12   0   -0.90    5.90
  12  13   0    2.20    3.80
  13 -13   0   -3.90    5.90
  13  13   0   -1.50    3.90
  14  13   0   -2.10    4.30
  13 -14   0    1.10    6.90
  14  12   0   32.50    6.40
  12 -14   0   48.10    9.60
  14  11   0   -0.10    3.90
  11 -14   0   -2.10    6.50
  14  10   0  452.45   32.20
  10 -14   0  469.35   34.60
  14   9   0    5.10    3.80
   9 -14   0   -7.30    4.80
   8 -14   0   91.39   12.40
  14   8   0  104.79   10.40
  14   7   0    3.70    3.70
   7 -14   0   -2.20    5.00
  14   6   0   93.99    9.50
   6 -14   0   73.69   10.30
  14   5   0   -2.60    3.30
   5 -14   0   -5.90    4.80
  14   4   0  249.28   18.90
   4 -14   0  252.37   19.90
   3 -14   0   -2.10    4.50
  14   3   0   -0.70    3.20
  -3  14   0   -0.90    5.20
   1 -14   0   -1.00    7.10
   1 -14   0   -3.30    5.10
  14   1   0   -2.70    3.20
   0 -14   0   62.79   11.30
   0 -14   0   75.09    9.80
  14   0   0   54.69    8.00
   0 -14   0   75.29   13.70
  14  -1   0   -5.00    3.30
  -1 -14   0   -2.70    6.10
  -1 -14   0   -0.90    5.90
  -1 -14   0  -10.00    5.80
  14  -2   0  496.15   33.80
  -2 -14   0  474.45   39.00
  -2 -14   0  477.05   39.50
  -3 -14   0   -3.60    8.40
  14  -3   0    3.10    4.10
   3  14   0    2.80    3.20
  -3 -14   0   -3.70    8.30
  -4 -14   0  120.39   22.30
   4  14   0  154.58   11.90
  14  -5   0   -8.00    4.00
  -5 -14   0    0.30    7.70
   5  14   0    1.40    3.40
  14  -6   0  190.88   16.30
  -6 -14   0  180.08   22.50
   6  14   0  177.68   14.20
  14  -7   0   -1.20    4.60
   7  14   0   -0.40    3.40
  14  -8   0  325.57   23.00
   8  14   0  251.27   20.40
  14  -9   0    2.50    5.30
   9  14   0    4.50    3.70
  10  14   0   41.30    5.90
  14 -10   0   15.70    7.10
  11  14   0    0.90    3.50
  14 -11   0    3.80    5.90
  12  14   0  267.87   20.00
  14 -12   0  250.07   23.10
  14 -13   0   -1.00    6.50
  13  14   0   -0.80    4.20
  14 -14   0  183.18   20.10
  14  14   0  179.08   15.70
  15  14   0   -5.80    4.20
  15  13   0   -3.20    4.20
  13 -15   0   -7.70   10.60
  15  12   0   -2.10    4.30
  12 -15   0    1.90    8.50
  11 -15   0    8.20    7.60
  15  11   0    8.60    4.70
  10 -15   0   -4.20    6.50
  15  10   0   -2.00    3.90
   9 -15   0    2.70    6.60
  15   9   0    7.50    4.40
  15   8   0   -1.90    3.60
   8 -15   0  -10.40    5.40
   7 -15   0   23.10    7.50
  15   7   0   22.80    5.50
   6 -15   0  -10.30    5.40
  15   6   0    3.60    4.00
   5 -15   0    4.00    6.20
  15   5   0   -1.30    3.50
  15   4   0   -2.90    3.50
   4 -15   0    2.30    7.10
  15   3   0   -2.00    3.30
  15   2   0    0.30    3.60
  15   1   0   -1.90    3.40
   0 -15   0   -3.80    6.40
  15   0   0    0.90    3.50
  -1 -15   0   14.10    7.30
  15  -1   0   10.50    4.40
  -2 -15   0    8.40    8.70
  15  -2   0    3.30    4.00
  15  -3   0   -8.40    3.90
  -3 -15   0   -3.70    8.40
  -4 -15   0    0.20   10.40
  15  -4   0   -1.90    4.10
  15  -5   0    0.40    4.70
  15  -6   0   14.40    5.60
  15  -7   0   -2.40    5.00
  15  -8   0   -5.80    4.80
  15  -9   0    8.60    6.60
  15 -10   0   -2.70    6.00
  15 -11   0    9.20    6.90
  15 -12   0   -4.50    6.30
  15 -13   0    7.50    7.70
  15 -14   0    8.90    8.00
  16  14   0   11.20    5.60
  16  13   0    1.70    4.90
  16  12   0   11.00    5.30
  16  11   0   -1.40    4.50
  16  10   0  124.19   12.60
  16   9   0   -3.60    4.00
  16   8   0   46.20    7.20
  16   7   0    3.20    4.10
  16   6   0   84.59   10.10
  16   5   0    1.70    4.00
  16   4   0  384.56   27.90
  16   3   0    3.50    4.00
  16   2   0   66.09    8.60
  16   1   0   -0.40    3.90
   1 -16   0   -3.70    6.80
  16   0   0  303.37   23.60
   0 -16   0  327.67   30.10
  16  -1   0   -0.90    4.30
  -1 -16   0    9.60    7.20
  16  -2   0  148.69   14.40
  -2 -16   0  155.88   25.00
  16  -3   0   -1.80    4.80
  16  -4   0   16.30    6.00
  16  -5   0   -4.90    4.70
  16  -6   0    4.40    5.50
  16  -7   0    2.80    5.60
  16  -8   0   -3.70    5.70
  16  -9   0   -6.00    5.80
  16 -10   0   48.30   10.50
  16 -11   0  -10.00    6.50
  16 -12   0  149.49   18.10
  16 -13   0    2.90    7.50
  16 -14   0   50.59   11.80
  17  14   0   -1.80    6.50
  17  13   0    0.10    4.80
  17  12   0   -2.00    4.70
  17  11   0    2.40    4.80
  17  10   0   -5.40    4.30
  17   9   0   -0.80    4.50
  17   8   0   -5.60    4.10
  17   7   0    3.90    4.70
  17   6   0    0.90    4.50
  17   5   0    3.50    4.60
  17   4   0    3.80    4.60
  17   3   0   -0.40    4.20
  17   2   0   -2.00    4.40
  17   1   0    8.20    5.10
  17   0   0    3.40    5.00
  17  -1   0   -9.40    4.50
  17  -2   0   -5.70    5.00
  17  -3   0   10.30    5.80
  17  -4   0  -10.50    4.90
  17  -5   0    4.10    5.90
  17  -6   0   -3.30    5.40
  17  -7   0   12.00    6.80
  17  -8   0    8.90    6.60
  17  -9   0   -2.00    6.80
  17 -10   0    0.10    6.90
  17 -11   0   13.70    8.00
  17 -12   0   -0.20    7.20
  17 -13   0   10.70    9.00
  17 -14   0   -5.10    8.40
  18  13   0   -2.50    5.40
  18  12   0   24.50    6.90
  18  11   0    5.30    5.30
  18  10   0   78.49   10.90
  18   9   0    4.60    5.30
  18   8   0   -0.10    4.70
  18   7   0   -1.30    4.60
  18   6   0    1.90    4.90
  18   5   0   -6.50    5.00
  18   4   0   -2.00    5.10
  18   3   0   -1.90    5.10
  18   2   0   48.20    8.60
  18   1   0    8.10    5.60
  18   0   0  191.88   18.00
  18  -1   0    2.20    5.50
  18  -2   0  191.98   18.40
  18  -3   0   -1.30    5.80
  18  -4   0   -2.90    5.60
  18  -5   0   -3.60    5.80
  18  -6   0  158.18   17.20
  18  -7   0    1.60    6.80
  18  -8   0  107.09   14.50
  18  -9   0   -8.60    7.20
  18 -10   0    3.60    7.90
  18 -11   0    4.70    7.60
  18 -12   0   32.00   10.70
  18 -13   0   -4.30    8.70
  18 -14   0    6.80    9.30
  19  13   0   -3.20    5.60
  19  12   0    2.10    5.90
  19  11   0    4.60    6.00
  19  10   0    4.50    6.00
  19   9   0   19.80    6.70
  19   8   0   17.70    6.20
  19   7   0    1.50    5.40
  19   6   0   -3.10    5.30
  19   5   0   -2.60    5.30
  19   4   0   -0.10    5.50
  19   3   0   -3.40    5.60
  19   2   0   -4.10    5.50
  19   1   0    5.90    6.20
  19   0   0    3.20    6.30
  19  -1   0   -6.00    6.40
  19  -2   0   -4.50    5.70
  19  -3   0    5.80    6.70
  19  -4   0   -0.80    6.10
  19  -5   0    9.80    7.40
  19  -6   0    7.60    7.20
  19  -7   0   -2.10    6.90
  19  -8   0  -11.50    7.30
  19  -9   0   -4.80    7.80
  19 -10   0    0.60    8.40
  19 -11   0    9.10    9.10
  19 -12   0    5.80    8.90
  19 -13   0    9.90    9.20
  20  11   0   11.00    6.60
  20  10   0  211.98   20.00
  20   9   0   -3.90    5.90
  20   8   0   12.90    6.90
  20   7   0   -2.80    5.80
  20   6   0  200.58   19.00
  20   5   0    5.50    6.50
  20   4   0  108.09   13.70
  20   3   0   -0.90    6.40
  20   2   0   11.70    7.00
  20   1   0   -3.00    6.40
  20   0   0   33.90    9.00
  20  -1   0   -4.90    6.50
  20  -2   0   -2.90    6.70
  20  -3   0   -5.40    6.50
  20  -4   0   -4.30    6.70
  20  -5   0   -4.10    7.10
  20  -6   0   50.29   11.70
  20  -7   0   -3.90    8.10
  20  -8   0    3.30    8.40
  20  -9   0   -1.80    8.50
  20 -10   0   75.09   14.00
  20 -11   0   19.10   10.10
  21   9   0   16.50    7.70
  21   8   0   -2.10    6.90
  21   7   0   13.90    7.80
  21   6   0    8.60    7.20
  21   5   0    1.00    7.00
  21   4   0    0.20    7.40
  21   3   0    4.50    7.20
  21   2   0    1.00    7.30
  21   1   0   -1.00    7.10
  21   0   0    4.80    7.20
  21  -1   0    3.00    7.40
  21  -2   0    2.00    7.60
  21  -3   0    0.10    7.80
  21  -4   0    2.10    7.90
  21  -5   0   -0.90    8.10
  21  -6   0   -2.90    7.90
  21  -7   0   28.70   10.30
  21  -8   0    8.90    9.20
  21  -9   0    7.50    9.20
  22   6   0  106.69   14.60
  22   5   0    9.10    8.30
  22   4   0   30.00    9.70
  22   3   0    3.90    7.80
  22   2   0   88.99   14.00
  22   1   0    2.00    7.60
  22   0   0  178.38   20.60
  22  -1   0    0.20    8.40
  22  -2   0   47.50   11.90
  22  -3   0   -1.80    9.00
  22  -4   0   29.50   10.60
  22  -5   0   -1.30    8.70
  22  -6   0   57.19   12.90
  23   1   0    1.00    8.30
  23   0   0    5.40    8.90
  23  -1   0   13.40    9.70
   1   0  -1  712.23   47.80
   0  -1  -1  834.92   48.20
   0   1  -1  714.13   47.70
  -1   0   1  727.63   47.80
   0  -1   1  708.83   47.60
  -1  -1  -1 6650.73  417.16
   1  -1  -1 6441.76  419.36
  -1   1  -1 6736.93  417.36
   1   1  -1 6561.74  419.76
   1   1  -1 6486.15  417.66
   1  -1  -1 6623.14  418.56
   1  -1   1 6244.38  417.46
  -1   1   1 6660.13  419.36
  -1  -1   1 6287.47  419.96
   1  -2  -1   75.29    5.90
  -2  -1  -1   54.09    6.00
   2   1  -1   59.19    5.00
  -1   2   1   69.89    5.80
   1  -2   1   73.89    5.10
   2   1   1   58.99    5.20
   0  -2  -1   62.39    5.30
   2   0  -1   55.69    4.50
   2   0  -1   49.70    4.80
   0  -2  -1   55.39    4.90
   0  -2   1   52.59    4.10
  -2   0   1   48.50    4.90
   1   2  -1  283.17   19.60
   2  -1  -1  284.77   20.40
   2  -1  -1  300.97   20.10
  -1  -2  -1  306.07   20.50
  -1  -2  -1  308.77   20.30
  -2   1   1  304.47   20.40
  -1  -2   1  286.97   19.50
   2  -1   1  284.37   19.70
   1   2   1  355.26   20.30
   2   2  -1  275.67   20.00
  -2  -2  -1  278.07   19.70
  -2  -2  -1  247.88   19.80
   2  -2  -1  309.77   19.90
   2   2  -1  342.37   19.00
   2  -2  -1  322.17   19.60
   2   2   1  278.07   19.70
   2  -2   1  277.97   19.30
  -2  -2   1  260.27   19.90
   2  -3  -1 1918.71  125.19
   2  -3  -1 1921.71  125.49
   3   2  -1 1905.21  125.99
  -2   3  -1 1698.33  124.49
   3   2  -1 2114.59  124.69
  -2   3  -1 2144.59  125.59
  -3  -2  -1 1982.40  125.69
  -3  -2  -1 1945.41  125.59
  -3  -2   1 1844.12  125.89
   2  -3   1 1911.11  124.39
   2  -3   1 1931.21  125.19
  -2   3   1 2046.30  125.59
   3   2   1 1945.51  125.59
  -3  -1  -1  680.63   47.50
   1  -3  -1  775.02   47.90
   1  -3  -1  770.82   47.90
   3   1  -1  735.83   48.30
  -1   3   1  727.23   47.90
   3   1   1  735.23   47.40
   3   1   1  729.33   47.80
  -3  -1   1  686.53   48.10
   3   0  -1 1903.51  126.79
   0  -3  -1 2030.90  126.49
   3   0  -1 2006.50  126.09
   0  -3  -1 2004.70  126.59
  -3   0  -1 1977.40  126.09
   0   3   1 1767.02  126.59
   3   0   1 2078.49  125.99
  -3   0   1 1955.20  126.79
  -3   1  -1   67.69    6.60
   3  -1   1   76.09    5.60
   3  -2  -1   85.69    8.30
  -3   2   1  109.49    9.70
   3   3  -1   36.80    3.30
  -4  -3  -1   28.40    5.00
   3  -4  -1   33.10    4.90
   4   3  -1   31.60    5.30
  -4  -3   1   29.10    5.10
   3  -4   1   30.40    2.70
   4   3   1   25.90    3.50
   4   3   1   31.80    5.00
   3  -4   1   31.70    5.50
   4   2  -1  323.57   23.50
  -4  -2  -1  309.47   22.90
   4   2  -1  351.66   21.80
   2  -4  -1  347.37   23.10
   2  -4  -1  319.87   22.60
  -2   4  -1  309.37   21.50
   4   2   1  308.97   22.90
   2  -4   1  382.06   22.90
  -4  -2   1  319.77   23.30
   2  -4   1  339.97   21.30
   4   2   1  310.47   22.10
  -4   0  -1  150.88   12.10
   0  -4  -1  166.68   12.30
   4   0   1  154.58   11.90
   4   0   1  173.28   11.30
   4  -1  -1  388.96   27.80
  -1  -4  -1  386.86   27.10
  -4   1  -1  399.06   26.90
   4  -1  -1  420.26   26.50
   4  -1   1  389.26   27.00
   4  -1   1  417.36   26.20
  -1  -4   1  384.36   27.70
  -4   1   1  399.66   27.60
  -2  -4  -1  403.26   30.10
  -2  -4  -1  422.46   29.80
   4  -2  -1  432.16   30.30
   4  -2  -1  471.45   29.30
  -4   2  -1  450.25   29.60
   2   4  -1  423.06   30.20
   2   4  -1  466.95   28.30
  -4   2   1  435.86   30.00
  -2  -4   1  500.05   28.50
   4  -2   1  438.06   28.60
  -2  -4   1  397.46   30.10
   4  -2   1  415.96   29.40
   3   4  -1  505.35   38.00
  -3  -4  -1  615.54   38.20
   4  -3  -1  537.45   37.80
  -3  -4   1  491.95   37.90
   3   4   1  606.74   38.10
   4  -3   1  550.64   37.30
  -4   3   1  598.34   38.10
   4   4  -1   33.50    5.90
  -5  -4  -1   93.39    9.50
   4  -5  -1   93.69    9.60
   4  -5  -1  105.19    8.70
  -4   5  -1  100.59    9.30
   5   4  -1  100.59   10.20
   5   4  -1  101.59    7.40
   5   4   1  108.09    8.30
   4  -5   1   93.89    9.20
  -5  -4   1  115.99   10.60
  -4   5   1   95.99   10.80
   5   4   1  104.29    9.80
   4  -5   1  102.09    7.20
   5   3  -1 1526.25  103.19
   5   3  -1 1604.34  100.99
   3  -5  -1 1592.54  101.79
  -5  -3  -1 1573.34  102.69
   3  -5  -1 1569.64  102.39
  -3   5  -1 1493.95  102.49
   3  -5   1 1641.34  100.79
  -5  -3   1 1519.95  102.99
   5   3   1 1590.64  102.89
   5   3   1 1593.14  101.49
  -3   5   1 1597.24  102.49
   3  -5   1 1569.14  102.09
  -2   5  -1  126.99    9.60
  -5  -2  -1  100.39    9.20
   5   2  -1  111.09    7.60
   5   2  -1   91.89    9.60
   2  -5   1   78.29    9.00
   5   2   1   84.29    9.00
  -5  -2   1  113.29    9.80
   5   2   1  100.59    7.90
   5   1  -1 1083.49   73.29
   1  -5  -1 1062.89   72.59
   5   1  -1 1220.88   71.69
   1  -5  -1 1170.48   72.49
  -5  -1  -1 1107.79   72.59
   5   1   1 1106.19   71.69
  -5  -1   1 1075.39   73.09
   5   1   1 1074.99   72.69
  -1   5   1 1080.09   72.99
   5   0  -1  745.53   45.00
   5   0  -1  688.73   46.50
  -5   0  -1  706.33   45.90
   5   0   1  718.23   44.90
   0   5   1  593.44   46.20
   5   0   1  680.43   45.90
  -5   0   1  689.93   46.60
  -1  -5  -1 1062.19   72.89
  -5   1  -1 1135.69   72.29
   5  -1  -1 1098.99   73.19
   5  -1  -1 1129.89   71.79
  -1  -5  -1 1123.99   72.39
   5  -1   1 1099.79   72.59
  -5   1   1 1122.39   73.09
  -1  -5   1 1097.89   72.99
   5  -1   1 1098.99   71.49
  -5   2   1  147.59   12.50
   5  -2   1  153.48   12.30
   3   5  -1   38.40    6.70
   5  -3  -1   59.69    5.80
   5  -3  -1   38.30    7.00
   3   5  -1   50.39    3.90
   5  -3   1   54.69    4.20
  -3  -5   1   54.29    7.20
  -5   4  -1  476.65   32.20
   5  -4  -1  509.25   31.70
   4   5  -1  458.45   33.10
   4   5  -1  469.05   30.50
   5  -4  -1  479.95   32.90
  -4  -5  -1  453.15   32.90
   4   5   1  446.16   32.80
   5  -4   1  454.45   30.60
  -5   4   1  489.05   33.00
   5  -4   1  467.35   32.20
  -4  -5   1  468.35   33.30
   5  -5  -1    0.70    3.80
  -5  -5  -1    1.00    3.30
   5   5  -1    3.30    1.50
   5  -5  -1   -0.80    2.60
   5   5  -1    9.30    4.00
   5   5   1    1.60    2.00
  -5   5   1    1.10    3.80
   5   5   1    1.60    2.70
  -5  -5   1    4.20    3.50
   5  -6  -1   96.79   10.80
   6   5  -1  115.49    7.90
   6   5  -1  103.99   11.10
   5  -6  -1  124.49    9.60
  -6  -5  -1  104.69   10.70
  -5   6  -1  102.99   10.40
  -5   6   1   91.19   12.00
  -6  -5   1  102.49   11.50
   5  -6   1   89.99   10.50
   6   5   1  104.99    8.60
   6   5   1  100.79   10.60
   5  -6   1  112.09    7.90
  -4   6  -1  328.47   25.00
   6   4  -1  346.77   26.00
   4  -6  -1  343.47   25.10
  -6  -4  -1  331.17   25.30
   4  -6  -1  333.07   24.00
  -4   6   1  361.96   25.40
  -6  -4   1  360.06   26.00
   4  -6   1  356.66   22.90
   6   4   1  358.26   23.60
   6   4   1  332.17   25.40
   4  -6   1  354.86   24.80
  -6  -2  -1   66.69    7.80
   6   2  -1   81.39    8.50
   0   6   1  234.28   16.30
  -6   0   1  173.48   16.00
   6   0   1  192.08   15.40
  -6   1  -1  210.78   16.30
   6  -1  -1  194.48   17.10
  -1  -6  -1  187.78   16.10
   6  -1  -1  212.08   15.20
  -1  -6  -1  243.38   17.50
  -1  -6   1  190.38   16.80
   6  -1   1  257.57   17.10
  -6   1   1  215.18   17.60
   6  -1   1  235.28   15.00
  -2  -6  -1   -0.50    2.90
  -6   2  -1    1.00    3.00
   6  -2  -1   -3.50    3.60
  -2  -6  -1    0.10    3.10
  -2  -6  -1   -1.80    2.70
   6  -2  -1   -0.30    1.70
   6  -2   1   -1.60    1.10
  -6   2   1   -5.00    2.90
  -2  -6   1    4.50    4.20
   6  -2   1   -0.80    2.70
   3   6  -1  121.59   10.80
  -3  -6  -1  108.99   11.40
   6  -3  -1  103.59    8.50
   3   6  -1  108.69    7.40
  -3  -6  -1  100.99    9.80
   6  -3  -1   99.49   10.60
  -6   3  -1  100.19    9.80
  -6   3   1  100.29   11.20
   6  -3   1  112.49    7.80
   6  -3   1  102.59    9.90
  -3  -6   1   92.19   10.60
   4   6  -1   85.29    9.40
   6  -4  -1   62.39    9.20
  -4  -6  -1   92.79    9.40
   4   6  -1   81.79    6.00
  -6   4  -1   78.79    8.90
  -4  -6  -1   90.49    9.40
   6  -4   1   82.99    8.90
   4   6   1   88.09    9.10
  -4  -6   1   78.89    9.60
   6  -4   1   74.89    6.10
  -6   4   1   81.99   10.20
  -5  -6  -1  351.66   25.20
  -6   5  -1  341.07   24.00
   6  -5  -1  310.57   23.00
   5   6  -1  307.67   24.70
   5   6  -1  347.47   21.90
   6  -5  -1  308.97   24.80
   6  -5   1  326.77   22.00
  -6   5   1  332.07   25.00
   6  -5   1  350.16   24.20
  -5  -6   1  345.27   25.50
   5   6   1  311.87   24.60
   5   6   1  320.47   22.60
   6   6  -1  100.59   10.80
  -6   6  -1   72.19   10.00
   6  -6  -1   88.59   11.50
   6   6  -1   95.59    7.20
  -6  -6   1   98.29   11.50
   6  -6   1   94.19    7.40
   6   6   1  102.39   10.50
  -6   6   1   88.59   12.00
   6   6   1  100.99    8.50
   7   6  -1  163.48   15.30
  -6   7  -1  160.18   14.40
   6  -7  -1  173.58   13.30
   7   6  -1  157.38   11.40
   6  -7  -1  152.68   14.50
  -7  -6  -1  154.78   14.90
   7   6   1  151.58   12.30
   6  -7   1  167.38   11.70
   6  -7   1  149.69   14.90
   7   6   1  155.88   14.60
  -7  -6   1  169.28   15.90
  -6   7   1  147.69   15.60
  -5   7  -1    9.10    4.50
   7   5  -1    3.10    3.60
  -7  -5  -1    1.10    3.40
   7   5  -1    2.50    1.70
   5  -7  -1   -0.40    3.60
   5  -7  -1   -0.90    3.10
   5  -7   1    1.60    2.00
  -5   7   1   -2.90    4.40
  -7  -5   1    1.90    4.40
   7   5   1    3.60    2.40
   5  -7   1    0.80    4.00
   7   5   1    2.10    3.50
   4  -7  -1  320.37   23.90
   7   4  -1  314.07   21.60
   7   4  -1  308.27   24.70
  -7  -4  -1  313.77   24.40
   4  -7  -1  370.86   23.10
  -4   7   1  336.27   24.50
   4  -7   1  342.67   21.60
  -7  -4   1  293.87   24.70
   4  -7   1  300.47   23.70
   7   4   1  309.77   22.10
   7   4   1  331.87   24.50
  -3   7  -1    2.40    3.30
   7   3  -1    9.50    3.90
   7   3  -1   12.60    2.30
   3  -7  -1   12.80    3.70
   3  -7  -1    8.80    3.30
  -7  -3  -1   15.40    4.20
  -3   7   1    8.90    4.20
   3  -7   1    8.60    4.20
   7   3   1   12.90    3.80
   7   3   1   10.30    2.70
  -7  -3   1   13.70    4.40
   3  -7   1    8.30    2.20
   7   2  -1 1549.94  100.59
   7   2  -1 1571.64   97.99
   2  -7  -1 1610.94   98.99
   2  -7  -1 1427.86   99.29
  -7  -2  -1 1490.35   99.59
  -7  -2   1 1495.75  100.19
   7   2   1 1548.74   98.19
   2  -7   1 1524.05   99.49
  -2   7   1 1497.85  100.19
   7   2   1 1482.25   99.89
   1  -7  -1    2.50    3.60
  -1   7  -1   -2.70    2.70
   1  -7  -1    1.50    2.90
   7   1  -1    1.40    1.80
  -7  -1  -1   -4.50    3.40
   7   1   1    2.40    1.80
  -7  -1   1    7.80    3.60
   7   1   1   -3.80    2.80
   1  -7   1   -4.70    3.20
  -1   7   1    1.90    3.60
  -7   0   1  133.09   13.70
   7  -1  -1  173.88   15.40
  -1  -7  -1  164.98   14.00
  -1  -7  -1  161.38   15.20
   7  -1  -1  187.38   12.90
  -7   1  -1  166.28   14.40
  -7   1   1  201.68   16.30
   7  -1   1  181.08   12.50
  -1  -7   1  166.08   14.90
   7  -1   1  183.08   14.70
  -2  -7  -1  396.96   29.60
   7  -2   1  418.16   29.30
   7  -3  -1  145.69   11.80
   7  -3  -1  145.49   13.90
  -3  -7  -1  167.68   15.00
   3   7  -1  175.48   10.70
  -3  -7  -1  148.99   13.20
  -7   3   1  151.68   14.70
   7  -3   1  151.58   13.30
  -3  -7   1  142.49   14.80
   4   7  -1  289.67   17.90
   7  -4  -1  276.57   19.10
   7  -4  -1  262.57   21.30
  -7   4  -1  266.87   20.40
   4   7  -1  265.67   21.50
  -7   4   1  275.97   21.20
   7  -4   1  269.67   18.10
   7  -4   1  244.18   20.50
  -4  -7   1  245.58   21.40
   7  -5  -1 1125.29   73.79
   5   7  -1 1137.69   76.09
   5   7  -1 1179.88   72.59
  -7   5  -1 1165.98   74.89
   7  -5  -1 1139.79   75.49
  -5  -7  -1 1080.69   75.69
   7  -5   1 1148.29   74.89
   5   7   1 1052.39   73.29
   7  -5   1 1138.99   72.79
  -5  -7   1 1055.99   75.99
   5   7   1 1098.79   75.69
  -7   5   1 1184.78   75.49
   7  -6  -1    5.60    4.90
   7  -6  -1    8.20    3.50
   6   7  -1   14.10    2.30
  -6  -7  -1    4.20    4.60
   6   7  -1    8.90    4.10
  -7   6  -1    8.70    4.20
   6   7   1    4.30    4.20
  -6  -7   1    7.70    4.90
   6   7   1    6.80    3.10
   7  -6   1    4.20    2.30
   7   7  -1   97.99   11.60
   7  -7  -1   85.89    9.90
   7  -7  -1   78.59   12.60
  -7   7  -1   91.59   11.10
   7   7  -1   96.09    7.60
  -7  -7  -1  101.89   11.70
   7  -7   1   98.69   11.50
   7  -7   1   87.69    8.00
   7   7   1   88.19    8.60
   7   7   1  106.69   11.30
  -7  -7   1   97.29   12.80
  -7   7   1   70.49   13.30
   7  -8  -1   80.49    9.60
   8   7  -1   80.99   11.20
  -7   8  -1   86.69   11.40
   8   7  -1   81.19    6.90
  -8  -7  -1   75.09   11.00
   7  -8  -1   58.99   11.10
   8   7   1   65.39    7.90
   7  -8   1   67.89   11.90
  -8  -7   1   92.49   13.00
   8   7   1   72.99   10.50
  -7   8   1   67.99   12.40
   7  -8   1   78.59    7.70
   6  -8  -1   18.30    5.40
  -8  -6  -1   17.80    5.50
   8   6  -1   15.20    5.80
  -6   8  -1   17.90    5.90
   8   6  -1   18.80    3.10
  -6   8   1   11.50    6.60
   8   6   1   13.50    3.70
  -8  -6   1   17.50    6.90
   8   6   1   16.40    5.60
   6  -8   1   11.80    5.50
   6  -8   1    9.60    3.30
  -5   8  -1   33.30    7.40
   8   5  -1   40.60    4.80
  -8  -5  -1   47.20    8.50
   5  -8  -1   39.20    7.10
   5  -8  -1   56.69    7.50
   8   5  -1   40.30    7.60
   8   5   1   53.89    5.80
   5  -8   1   36.70    4.80
   5  -8   1   48.60    7.40
   8   5   1   58.99    8.50
  -5   8   1   32.10    7.20
   8   4  -1  111.69   12.00
   4  -8  -1  100.89   10.30
   8   4  -1  118.99    8.60
   4  -8  -1   89.89   11.10
  -8  -4   1  127.19   14.00
  -4   8   1   98.39   12.40
   4  -8   1   87.99   11.20
   8   4   1  116.89   11.90
   8   4   1  114.09    9.10
   4  -8   1  107.19    8.50
   3  -8  -1   89.49   10.20
  -3   8   1  107.99   11.70
   8   2  -1    1.00    3.70
  -8  -2  -1    2.80    3.50
   2  -8  -1   -4.00    3.30
   2  -8  -1    0.90    3.50
  -2   8  -1   -2.10    2.70
  -2   8   1    6.30    4.70
   8   2   1   -1.00    2.30
   2  -8   1    0.60    3.80
  -8  -2   1   -1.40    3.50
   8   2   1    3.50    3.30
   8   1  -1   59.19   11.10
   1  -8   1  101.09   11.10
  -8  -1   1   73.89   12.40
   0  -8  -1  197.68   16.30
   0  -8  -1  215.08   17.60
   8   0  -1  211.88   18.20
  -8   0  -1  199.48   16.80
   8   0  -1  215.18   15.00
  -8   0   1  214.38   18.90
   8   0   1  200.68   14.60
   8   0   1  201.38   17.20
   8  -1  -1   85.19   11.40
   8  -1  -1   89.09    8.30
  -1  -8  -1   79.29    9.80
  -8   1  -1  101.09   10.40
   8  -1   1  107.69    7.80
  -1  -8   1  120.09   12.20
  -8   1   1   73.29   12.60
   8  -1   1  100.99   10.80
  -1  -8   1   93.59   11.30
  -2  -8  -1    4.90    4.00
  -2  -8  -1    8.50    4.70
  -8   2  -1    0.30    4.20
   8  -2  -1   -0.40    5.00
  -2  -8  -1   -3.20    5.10
   8  -2  -1    0.00    2.20
  -8   2   1   -2.10    4.70
  -2  -8   1    8.70    6.20
   8  -2   1   14.80    5.90
   8  -3  -1   16.90    3.90
   3   8  -1   26.40    2.80
  -3  -8  -1   31.10    7.40
  -8   3  -1   17.70    5.20
   8  -3  -1   27.00    7.90
  -3  -8  -1   20.00    5.50
  -8   3   1   17.40    6.30
   8  -3   1   17.80    2.90
   8  -3   1   22.20    5.60
  -8   4  -1   86.19   10.60
   8  -4  -1   88.69   10.80
   8  -4  -1   86.29    8.20
   8  -4   1   82.89    7.20
  -5  -8  -1   43.30    8.60
   5   8  -1   40.40    8.10
   5   8  -1   38.30    4.60
   8  -5  -1   42.90    7.70
   8  -5  -1   48.80    6.60
  -8   5  -1   53.49    7.80
  -8   5   1   43.80    8.00
  -5  -8   1   67.39   11.00
   8  -5   1   44.10    8.00
   5   8   1   40.20    5.70
   8  -5   1   37.00    4.60
   6   8  -1   14.90    3.10
   8  -6  -1    5.40    4.00
   8  -6  -1    4.20    4.70
  -8   6  -1    2.60    5.20
   6   8  -1    6.50    4.90
  -6  -8   1   11.00    6.60
   8  -6   1    3.80    2.80
  -8   6   1   11.00    6.40
   8  -6   1    5.30    5.20
   7   8  -1  251.17   21.90
  -7  -8  -1  256.27   22.90
   7   8  -1  267.17   17.90
  -8   7  -1  252.17   21.30
   8  -7  -1  253.87   22.20
   8  -7  -1  245.48   19.80
  -7  -8   1  243.88   23.00
   7   8   1  263.37   22.20
   7   8   1  278.57   19.00
   8  -7   1  269.27   18.40
   8  -7   1  256.97   22.00
  -8   7   1  268.07   22.80
   8   8  -1    2.80    2.70
  -8   8  -1    1.40    5.30
   8   8  -1    3.10    4.90
   8  -8  -1    8.70    6.50
  -8  -8  -1    4.50    5.20
   8   8   1    3.30    4.60
  -8  -8   1    5.80    6.50
   8  -8   1   -2.90    5.90
   9   8  -1   23.50    7.60
  -8   9  -1   31.20    8.10
   8  -9  -1   33.60    8.30
   8  -9  -1   14.60    6.20
  -9  -8  -1   21.80    7.10
   9   8  -1   44.50    5.50
  -9  -8   1   37.30    9.30
  -8   9   1   31.50    8.40
   9   8   1   26.60    5.20
   9   8   1   20.90    6.70
   8  -9   1   27.60    7.70
   8  -9   1   21.70    4.90
  -7   9  -1 1389.56   90.49
   9   7  -1 1356.16   91.69
   7  -9  -1 1289.87   88.49
  -9  -7  -1 1383.86   91.29
   9   7  -1 1305.87   86.99
   7  -9  -1 1324.77   90.09
   7  -9   1 1391.16   87.49
  -9  -7   1 1392.26   92.09
  -7   9   1 1334.27   90.49
   9   7   1 1280.57   90.89
   9   7   1 1305.37   87.59
   7  -9   1 1369.36   89.89
  -9  -6  -1    6.30    6.00
   9   6  -1    7.70    5.00
  -6   9  -1   14.50    6.80
   6  -9  -1   11.40    5.00
   9   6  -1    4.60    2.70
   6  -9   1    4.90    5.20
   9   6   1    0.30    3.10
  -9  -6   1    8.70    6.70
   6  -9   1    1.10    3.40
   9   6   1    7.40    5.10
   9   5  -1   61.89   10.30
  -9  -5  -1   74.09   11.40
   9   5  -1   55.29    6.20
   5  -9  -1   66.39    8.30
   5  -9  -1   63.59   10.10
   9   5   1   56.69    7.00
   5  -9   1   62.99    9.10
   9   5   1   68.99   10.00
  -5   9   1   77.49   12.50
  -9  -5   1   73.19   11.50
   5  -9   1   62.29    6.80
  -4   9  -1  365.96   27.80
   4  -9  -1  340.77   26.40
  -9  -3  -1 1658.23  109.89
   3  -9  -1 1726.13  108.69
   3  -9  -1 1625.34  109.49
   9   3  -1 1676.63  107.49
   9   3  -1 1661.13  110.89
   9   3   1 1637.74  110.29
  -9  -3   1 1686.63  110.69
  -3   9   1 1603.94  110.69
   3  -9   1 1650.03  107.19
   9   3   1 1686.83  107.79
   3  -9   1 1690.33  109.59
   2  -9  -1  381.86   26.50
   9   2  -1  355.66   28.70
   2  -9  -1  347.07   27.20
   9   2  -1  383.56   25.00
  -9  -2  -1  368.56   27.70
  -9  -2   1  349.17   28.40
   2  -9   1  373.86   27.80
   9   2   1  359.86   27.80
   9   2   1  382.16   25.20
   9   1  -1  653.73   43.20
   9   1  -1  642.14   46.50
  -9  -1  -1  624.94   45.50
   1  -9  -1  643.04   45.50
   1  -9  -1  655.93   44.30
  -9  -1   1  682.03   46.60
   9   1   1  671.23   43.10
   9   1   1  639.44   45.80
   1  -9   1  655.23   45.90
   9   0  -1   30.80    7.30
  -9   0  -1   29.60    6.30
   9   0  -1   27.90    4.10
  -9   0   1   19.90    7.70
   0  -9   1   23.50    7.20
   0   9   1   14.00    5.10
   9   0   1   27.40    3.80
   9   0   1   31.20    6.60
   9  -1  -1   76.29    7.50
   9  -1  -1  102.39   11.80
  -9   1  -1   65.19   10.30
  -1  -9  -1   89.39   11.80
  -1  -9  -1   87.99    9.90
   9  -1   1   73.49    7.00
   9  -1   1   80.79   11.10
   9  -2  -1  352.46   31.00
   9  -2  -1  379.66   28.40
  -9   2  -1  425.56   30.30
  -2  -9  -1  475.75   32.70
  -2  -9   1  440.56   32.50
   9  -2   1  385.06   27.80
  -9   2   1  463.75   31.80
   9  -2   1  417.86   30.90
  -9   3   1   76.29   12.00
   9  -4  -1  145.09   15.70
  -9   4  -1  140.49   14.10
   4   9  -1  169.78   10.60
   9  -4  -1  133.69   11.90
  -9   4   1  150.48   15.80
   9  -4   1  138.39   14.30
  -4  -9   1  126.29   17.00
   9  -5  -1   85.69   12.10
   9  -5  -1   75.89    9.10
  -9   5  -1   81.39   11.00
  -9   5   1   74.19   12.40
   5   9   1  100.79    8.70
   9  -5   1   91.09    7.80
   9  -5   1   87.29   11.70
  -6  -9  -1   39.80    8.90
   9  -6  -1   27.10    7.10
  -9   6  -1   17.10    7.10
   9  -6  -1   26.50    6.10
   6   9  -1   24.90    7.60
   9  -6   1   29.10    7.70
   6   9   1   25.10    5.00
  -9   6   1   28.30    7.90
  -6  -9   1   42.20    9.60
  -9   7  -1    7.00    5.60
   7   9   1   20.70    5.60
   9  -8  -1   52.49    8.60
  -8  -9  -1   77.79   13.60
   8   9  -1   54.69   10.80
   8   9  -1   46.90    6.50
   9  -8  -1   73.49   13.30
  -9   8  -1   59.69   11.10
  -8  -9   1   61.69   12.10
   8   9   1   65.49   12.00
   9  -8   1   84.79    8.10
   8   9   1   69.39    8.20
   9  -8   1   65.69   10.80
  -9   8   1   62.39   10.90
   9  -9  -1  429.56   32.00
   9  -9  -1  478.85   35.20
   9   9  -1  451.05   29.80
  -9   9  -1  436.16   33.60
   9   9  -1  411.36   34.40
  -9  -9  -1  420.86   34.50
   9   9   1  435.66   30.60
  -9  -9   1  406.86   35.60
   9   9   1  419.16   34.40
   9  -9   1  459.15   30.80
  -9   9   1  448.56   34.30
   9  -9   1  491.45   35.20
   9 -10  -1   17.40    7.40
  10   9  -1   29.10    8.00
   9 -10  -1   45.40    9.70
  10   9  -1   33.50    5.00
  10   9   1   31.00   11.50
  -9  10   1   34.60    9.30
   9 -10   1   20.40    6.10
 -10  -9   1   49.10   11.40
  10   9   1   32.60    6.00
   8 -10  -1   17.00    6.50
  -8  10  -1   10.60    7.10
  10   8  -1   15.00    6.80
 -10  -8  -1   18.10    8.00
   8 -10  -1   13.20    6.00
  10   8  -1   14.40    3.60
  -8  10   1   12.30    7.00
  10   8   1   12.30    6.50
 -10  -8   1   22.40    9.50
   8 -10   1   10.30    4.50
   8 -10   1   15.30    7.20
  10   8   1   20.80    4.60
  10   7  -1   44.00    9.50
   7 -10  -1   33.90    7.30
 -10  -7  -1   45.20   10.10
   7 -10  -1   31.40    7.50
  10   7  -1   45.50    6.20
  10   7   1   41.50    9.10
   7 -10   1   45.10    6.10
 -10  -7   1   42.70   10.20
   7 -10   1   47.10    9.20
  -7  10   1   41.40    9.20
   6 -10  -1   34.80    7.20
  -6  10  -1   19.70    7.50
 -10  -6  -1   27.00    8.10
  10   6  -1   23.50    7.50
   6 -10  -1   32.40    6.70
  10   6   1   30.60    5.10
 -10  -6   1   28.20    9.70
  -6  10   1   28.90    8.20
  10   6   1   21.00    6.80
   6 -10   1   29.50    5.20
   6 -10   1   30.30    7.40
 -10  -5  -1  331.67   27.90
   5 -10  -1  326.47   26.80
  10   5  -1  346.27   24.00
  10   5  -1  341.07   28.50
   5 -10  -1  313.67   25.80
  -5  10   1  361.26   29.00
  10   5   1  342.87   28.00
   5 -10   1  347.27   24.40
 -10  -5   1  358.56   30.10
  10   5   1  384.26   24.70
   5 -10   1  366.36   27.30
   4 -10  -1    7.30    5.30
 -10  -4  -1   17.40    5.90
  10   4  -1   16.30    3.40
  10   4  -1   17.20    6.40
   4 -10  -1    8.80    4.90
  10   4   1   11.90    5.80
 -10  -4   1   17.80    7.70
  -4  10   1    7.00    7.90
  10   4   1   13.60    3.60
 -10  -2  -1   -1.90    5.00
  10   2  -1    0.00    4.80
  -2  10  -1    7.20    4.40
   2 -10  -1   -7.00    3.70
   2 -10  -1   -2.60    4.20
  10   2  -1   -6.70    2.30
  10   2   1   -1.60    3.90
   2 -10   1   -1.10    5.10
 -10  -2   1    8.30    5.60
  10   2   1    0.80    2.50
  -2  10   1   -3.00    5.00
  10   1  -1  247.58   18.10
 -10  -1  -1  254.57   21.60
   1 -10  -1  235.28   21.20
   1 -10  -1  237.18   19.70
  10   1  -1  257.97   22.40
  10   1   1  240.08   17.80
   1 -10   1  290.87   22.10
  10   1   1  265.17   21.90
 -10  -1   1  231.18   23.60
   0 -10  -1   86.99   13.20
  10   0  -1  127.69   14.30
  10  -1  -1  131.89   10.50
  -1 -10  -1  102.69   12.30
  -1 -10  -1   98.09   14.20
  10  -1  -1  126.99   14.90
 -10   1  -1  113.59   13.10
  10  -1   1  135.69   14.20
  -1 -10   1  115.79   14.60
 -10   1   1  122.19   15.80
  10  -1   1  129.59    9.60
  -1 -10   1   92.19   14.30
  -2 -10  -1   13.60    7.00
  10  -2  -1   14.60    4.00
  -2 -10  -1   27.50    6.70
  10  -2  -1   13.70    6.30
 -10   2  -1   25.40    6.60
  10  -2   1   18.20    3.50
 -10   2   1   16.10    6.40
  -2 -10   1   10.70    6.80
  10  -2   1   23.40    6.60
  -2 -10   1   26.60    8.60
  -3 -10   1  110.59   18.40
  10  -4  -1   93.69   13.50
 -10   4  -1   54.79   10.80
  10  -4  -1   69.49    8.30
  -4 -10  -1  104.09   15.70
   4  10  -1   82.29    6.80
  -4 -10  -1   90.59   11.60
  -4 -10   1  113.79   15.70
  10  -4   1   84.49   11.50
  10  -4   1   67.39    7.50
 -10   4   1   64.89   10.00
   5  10  -1  172.28   13.10
  -5 -10   1  203.58   20.80
 -10   5   1  190.28   19.10
   6  10  -1   47.80    5.40
 -10   6   1   30.80    7.80
 -10   7  -1   26.90    7.90
   7  10  -1   29.10    8.10
  -7 -10  -1   33.90   10.50
  10  -7  -1   29.60    7.90
  10  -7  -1   27.50    6.60
  -7 -10   1   49.80   11.50
  10  -7   1   52.39    6.90
 -10   7   1   24.50    8.30
   7  10   1   34.30    5.80
  10  -7   1   33.80    8.40
  -9 -10  -1   17.20    7.20
   9  10  -1   15.50    3.60
  10  -9  -1   12.00    5.90
  10  -9  -1   15.80    7.40
  -9 -10   1   13.80    8.00
   9  10   1   12.00    7.60
 -10   9   1   10.60    7.80
  10  -9   1   23.90    4.90
   9  10   1   21.10    5.70
  10 -10  -1    3.80    5.40
  10 -10   1    6.20    4.20
 -10  10   1   21.90    7.50
  11  10  -1   47.30    6.40
  10 -11  -1   48.30    9.40
 -11 -10   1   51.59   12.70
  10 -11   1   56.99    7.70
  11  10   1   62.59    8.20
   9 -11  -1   87.69   12.30
   9 -11  -1  150.88   23.40
  11   9  -1   92.89    8.80
  11   9   1   87.09   10.20
   9 -11   1   97.99   10.40
 -11  -9   1  105.59   18.00
  11   8  -1   62.29    7.30
   8 -11  -1   66.89    9.80
  11   8  -1   66.09   11.80
   8 -11  -1   61.09   10.00
  -8  11   1   49.90   10.40
   8 -11   1   88.19    9.00
  11   8   1   62.49    8.40
 -11  -8   1   75.49   13.10
   7 -11  -1  248.58   22.00
  11   7  -1  256.97   24.30
  11   7  -1  255.37   19.50
 -11  -7  -1  296.77   26.00
   7 -11  -1  243.78   22.80
  -7  11  -1  206.88   27.00
  11   7   1  266.57   20.20
  -7  11   1  285.67   25.20
 -11  -7   1  324.27   28.00
  11   7   1  260.97   24.10
   7 -11   1  329.77   20.70
   7 -11   1  284.97   24.40
  11   6  -1   14.00    3.60
  11   6  -1    8.60    6.00
   6 -11  -1    9.10    5.70
 -11  -6  -1    8.90    6.40
   6 -11  -1    7.50    5.40
   6 -11   1    8.10    6.20
  -6  11   1   30.10    9.10
   6 -11   1    7.70    4.20
  11   6   1    6.40    5.80
 -11  -6   1   17.80    8.00
  11   6   1   10.80    4.00
  11   5  -1    4.90    3.20
  11   5  -1   -3.90    5.50
 -11  -5  -1   -2.40    4.80
   5 -11  -1   -1.00    5.20
   5 -11  -1    0.30    4.50
  -5  11  -1    5.90    5.80
   5 -11   1   -2.90    5.70
  11   5   1    2.60    5.30
   5 -11   1    2.30    3.60
  -5  11   1   -7.60    7.40
 -11  -5   1   -5.10    6.40
  11   5   1    5.00    3.20
 -11  -4  -1   27.40    7.30
  11   4  -1   46.00    6.00
  11   4  -1   21.50    8.00
   4 -11  -1   32.40    6.90
  11   4   1   16.50    7.00
   4 -11   1   26.40    7.90
  11   4   1   26.80    4.60
   4 -11   1   27.20    4.60
 -11  -4   1   25.50    9.60
  11   3  -1 1401.46   89.29
  11   3  -1 1399.56   93.59
   3 -11  -1 1394.66   90.59
   3 -11  -1 1263.77   91.39
 -11  -3  -1 1337.17   92.09
  11   3   1 1447.76   89.39
   3 -11   1 1380.86   91.99
 -11  -3   1 1361.56   93.09
  11   3   1 1349.47   92.79
   2 -11  -1  164.48   15.30
   1 -11  -1  691.83   48.50
  11   1  -1  644.34   49.40
   1 -11  -1  639.94   46.60
  11   1  -1  641.54   45.40
 -11  -1   1  742.23   51.49
   1 -11   1  704.83   48.80
  11   1   1  664.63   45.20
  11   1   1  722.33   49.40
 -11   0  -1  107.89   14.20
  11   0  -1   91.89   15.40
  11   0  -1   67.39    9.10
   0 -11  -1  117.19   12.40
   0 -11   1   93.89   14.40
  11   0   1  118.19   15.60
 -11   0   1   92.59   14.40
   0 -11   1  104.39   14.90
  11   0   1   82.09    8.50
  11  -1  -1  301.37   27.20
 -11   1  -1  305.17   25.60
  11  -1  -1  283.67   22.70
  11  -1   1  317.17   22.30
  11  -1   1  327.67   27.00
 -11   1   1  386.56   28.00
  -2 -11  -1  291.47   22.80
  -2 -11  -1  344.77   26.90
 -11   2  -1  259.27   23.20
  11  -2  -1  262.27   20.40
  11  -2  -1  279.67   25.00
  11  -2   1  283.57   24.50
  -2 -11   1  254.27   26.20
 -11   2   1  258.47   24.10
  11  -2   1  281.57   19.80
 -11   3  -1  992.70   69.99
  11  -3  -1 1022.40   68.59
  11  -3  -1 1086.89   72.29
  -3 -11  -1  878.61   72.39
  11  -3   1 1054.29   67.79
 -11   3   1 1118.89   71.69
  11  -3   1 1043.90   71.39
  -3 -11   1 1097.99   73.69
   4  11  -1  169.78   11.90
  11  -4  -1  145.99   20.90
  -4 -11  -1  184.08   19.00
 -11   4   1  197.28   17.90
  -4 -11   1  127.99   17.60
  11  -5  -1   14.80    9.10
   5  11  -1   10.70    2.80
  11  -5  -1    6.40    4.40
 -11   5  -1    5.40    5.60
 -11   5   1    2.00    6.00
  11  -5   1    1.60    6.80
  -5 -11   1    9.80    7.50
  -5 -11   1   -4.00    5.90
  11  -5   1    8.00    3.50
   5  11   1    5.30    4.10
   6  11  -1  111.79    8.10
  11  -6  -1   87.39   12.80
  11  -6  -1   88.19   10.50
  -6 -11  -1  106.59   17.60
 -11   6  -1   74.59   12.60
   6  11   1   78.79    9.80
 -11   6   1   77.79   14.50
  11  -6   1   85.69    9.10
  11  -6   1   93.59   12.70
  11  -7  -1  606.84   39.70
  11  -7  -1  509.75   41.70
   7  11  -1  554.04   37.30
  -7 -11  -1  544.75   43.60
  -7 -11   1  545.65   45.00
  11  -7   1  621.94   38.50
   7  11   1  545.35   38.30
 -11   7   1  546.85   42.10
  11  -7   1  586.34   42.70
  11  -8  -1  133.79   13.90
  11  -8  -1  143.49   16.70
   8  11  -1  135.39   10.90
 -11   8   1  127.89   17.60
  11  -8   1  143.49   12.40
  -8 -11   1  142.49   20.10
  11  -9  -1  100.09   12.30
   9  11  -1   91.29    8.50
  -9 -11   1   97.89   15.60
 -11   9   1   86.29   16.20
  11  -9   1   96.09   10.30
   9  11   1  103.79   10.70
  10  11  -1   25.40    4.30
  11 -10  -1   19.00    6.90
 -10 -11   1   30.30    9.90
  11 -10   1   17.20    5.50
  10  11   1   27.10    5.70
  11 -11  -1   10.90    6.50
  11  11  -1   10.60    3.40
  11 -11   1   12.50    5.00
  11  11   1   15.10    5.10
 -11 -11   1   10.10    9.00
  12  11  -1   -0.50    3.10
  11 -12  -1   -7.50    5.70
  12  11   1    1.30    4.00
  11 -12   1   -1.40    4.40
  10 -12  -1   17.30    7.00
  12  10  -1   18.50    4.10
  10 -12   1   18.00    5.80
  12  10   1   16.50    4.80
  12   9  -1    4.60    3.50
   9 -12  -1   -0.70    5.70
   9 -12   1   14.40    5.20
 -12  -9   1   10.40    7.30
  12   9   1   -6.30    3.90
   8 -12  -1   -2.70    5.10
  12   8  -1    1.40    3.10
   8 -12   1    0.20    4.30
 -12  -8   1    0.90    7.50
  12   8   1    3.20    3.80
  -8  12   1   -2.20    6.80
  12   7  -1   12.00    3.90
  12   7  -1   13.50    7.00
   7 -12  -1   20.30    6.80
   7 -12  -1    9.30    5.80
   7 -12   1   12.70    4.80
  12   7   1   13.90    4.40
 -12  -7   1   21.40    8.90
  -7  12   1   13.20    8.50
   6 -12  -1   87.39   12.00
   6 -12  -1   66.79    9.80
  12   6  -1   57.59   11.10
  12   6  -1   58.29    7.60
   6 -12   1   60.69    7.60
 -12  -6   1   68.29   12.40
  12   6   1   64.39    8.30
  12   5  -1  103.19   10.20
  12   5  -1  125.49   15.30
   5 -12  -1   92.69   13.30
 -12  -5  -1  117.59   15.90
   5 -12  -1   90.99   13.10
  12   5   1  100.89   10.40
   5 -12   1  130.89   14.90
  12   5   1  116.89   15.10
   5 -12   1   90.89   10.40
  -5  12   1   93.39   15.10
   4 -12  -1   10.30    5.60
   4 -12  -1   14.40    6.50
  12   4  -1   14.40    6.90
  12   4  -1   22.70    4.50
 -12  -4  -1   27.70    7.40
  -4  12   1    9.10    7.90
   4 -12   1   16.60    4.40
  12   4   1   19.50    4.40
 -12  -4   1   38.80    9.10
  12   4   1   11.30    6.70
   4 -12   1   18.20    7.70
 -12  -3  -1   26.20    8.50
   3 -12  -1   25.00    6.50
   3 -12  -1   10.90    5.30
  12   3  -1   21.30    7.40
  12   3  -1   22.80    4.60
   3 -12   1   23.90    8.10
 -12  -3   1   28.90    8.80
  12   3   1   25.60    7.20
  12   3   1   32.40    4.70
 -12  -2  -1   19.50    9.50
   2 -12  -1    9.60    6.20
   2 -12  -1   14.70    6.10
  12   2  -1   12.70    6.20
  12   2  -1    8.90    3.90
   2 -12   1    9.90    8.10
  12   2   1   13.50    6.50
  12   2   1    7.30    3.50
 -12  -2   1   15.30    9.20
 -12  -1  -1  140.59   16.70
   1 -12  -1  189.08   18.20
  12   1  -1  132.69   17.80
  12   1  -1  136.79   12.60
  12   1   1  135.29   11.90
   1 -12   1  152.68   17.60
  12   1   1  136.79   17.60
 -12  -1   1  173.78   21.90
  12   0  -1   47.00   10.80
   0 -12  -1   43.60    8.50
 -12   0  -1   39.30    8.30
  12   0  -1   27.40    5.70
   0 -12   1   29.70    9.00
  12   0   1   30.40    5.20
   0 -12   1   44.70    9.70
 -12   0   1   52.09   11.10
  12   0   1   39.40    9.50
  12  -1  -1   87.39   13.60
  -1 -12  -1   84.79   13.90
  12  -1  -1   56.79    8.60
 -12   1  -1   58.39    9.40
  -1 -12  -1   86.49   13.60
  -1 -12  -1   59.19   10.50
  -1 -12   1   81.89   13.30
  12  -1   1   79.29   12.10
 -12   1   1   94.19   13.50
  12  -1   1   64.29    7.60
  -2 -12  -1   -5.70    6.40
  -2 -12  -1    3.40    7.60
 -12   2  -1   -6.60    5.00
  12  -2  -1   -5.20    3.70
  12  -2  -1   -7.10    5.70
  -2 -12   1   -3.40    6.50
  -2 -12   1   -0.40    7.70
  12  -2   1   -4.70    5.70
  12  -2   1   -1.80    2.90
 -12   2   1   -9.40    5.20
  -3 -12  -1   73.49   13.80
 -12   3  -1   55.79    9.30
  -3 -12  -1   57.79   10.40
  12  -3  -1   45.40    7.10
  12  -3  -1   36.70    9.70
  12  -3   1   61.09    7.00
 -12   3   1   42.20    9.70
  12  -3   1   56.69   10.80
  12  -4  -1   -0.20    6.30
  -4 -12  -1    4.10    7.70
   4  12  -1    6.90    2.40
 -12   4  -1    1.80    5.20
  -4 -12  -1   10.60   10.00
  12  -4  -1    3.70    4.10
  12  -4   1   -7.70    7.50
  12  -4   1    5.60    3.50
  -4 -12   1   16.60    9.80
 -12   4   1   -3.10    5.40
  -4 -12   1   -3.90    6.30
   5  12  -1  144.89   10.90
  12  -5  -1  149.88   13.60
  12  -5  -1  130.09   20.20
  -5 -12  -1  167.58   20.70
  12  -5   1  175.28   12.60
  -5 -12   1  140.69   20.90
  12  -5   1  127.49   18.80
 -12   5   1  120.29   16.20
   5  12   1  143.59   12.90
  12  -6  -1    7.50    4.80
  -6 -12  -1   11.30    7.40
  12  -6  -1   -1.60    6.80
   6  12  -1   13.30    3.00
  -6 -12   1   12.50    7.50
   6  12   1    3.70    4.30
 -12   6   1   -9.80    6.00
  12  -6   1    7.00    4.20
  -6 -12   1    4.20    6.20
   7  12  -1   40.10    5.60
  12  -7  -1   35.90    8.80
  12  -7  -1   41.10    7.70
  12  -7   1   42.40    6.30
   7  12   1   37.10    6.30
  -7 -12   1   49.10   12.50
 -12   7   1   28.40    8.40
   8  12  -1   18.70    3.70
  12  -8  -1   21.90    6.50
 -12   8   1   25.60   14.60
   8  12   1   22.70    5.50
  -8 -12   1   19.20   10.40
  12  -8   1   12.40    4.90
   9  12  -1   18.90    3.80
  12  -9  -1   13.00    6.80
  -9 -12   1   26.90    9.80
  12  -9   1   16.60    5.20
   9  12   1   17.60    5.90
  12 -10  -1    0.00    5.80
  10  12  -1    2.40    3.10
  10  12   1    8.70    4.60
 -10 -12   1    6.50    7.70
  12 -10   1    4.20    4.60
  11  12  -1   11.10    3.60
  12 -11  -1   10.00    6.80
  12 -11   1   10.50    5.20
  11  12   1   14.30    5.40
  12 -12  -1   -0.30    6.50
  12  12  -1    0.20    3.00
  12  12   1   -1.20    4.40
  12 -12   1   -2.50    4.60
  13  12  -1   -4.30    3.40
  12 -13  -1   -3.60    6.60
  12 -13   1    3.50    5.50
  13  12   1   -2.40    4.20
  13  11  -1   88.29    9.50
  11 -13  -1   87.49   12.80
  13  11   1   92.19   10.70
  11 -13   1  112.99   12.70
  10 -13  -1   14.60    7.00
  13  10  -1    8.80    3.70
  13  10   1    8.20    4.60
  10 -13   1    5.00    5.50
  13   9  -1  141.39   12.00
   9 -13  -1  115.89   15.90
  13   9   1  144.69   12.90
   9 -13   1  142.39   14.00
  13   8  -1   38.00    5.80
   8 -13  -1   43.20    8.20
  13   8   1   36.20    6.10
   8 -13   1   31.20    7.10
   7 -13  -1   -2.40    5.50
  -7  13   1    0.20    9.20
   7 -13   1   14.50    5.10
  13   6  -1   14.20    7.00
   6 -13  -1    6.00    6.10
  13   6  -1   11.30    4.10
   6 -13  -1   13.10    6.10
  13   6   1   26.90    4.70
 -13  -6   1   28.10    9.60
  -6  13   1   24.60    9.90
   6 -13   1   10.70    4.70
  13   5  -1   78.39   12.90
   5 -13  -1   72.99   10.30
  13   5  -1   73.89    8.20
   5 -13  -1   71.39   11.30
   5 -13   1   71.79    8.80
  -5  13   1   45.50   11.70
  13   5   1   67.09    8.20
 -13  -5   1   74.99   12.60
   4 -13  -1  110.79   13.60
  13   4  -1  136.49   11.70
   4 -13  -1  130.79   14.30
  13   4  -1  127.49   16.10
   4 -13   1  132.29   11.70
  13   4   1  138.89   11.80
 -13  -4   1  131.49   17.70
  13   3  -1   12.00    4.30
  -3  13  -1   -7.10    9.10
  13   3  -1    7.00    6.10
   3 -13  -1    5.90    4.70
   3 -13  -1   15.10    6.10
 -13  -3   1    5.80    8.50
  13   3   1   10.10    3.80
   3 -13   1   10.20   10.00
  -3  13   1    1.10    6.00
   2 -13  -1   39.00    8.80
  13   2  -1   45.50   10.10
   2 -13  -1   56.19    9.00
  13   2  -1   61.69    7.60
   2 -13   1   73.79   13.10
  13   2   1   48.50    6.70
  13   2   1   49.30   10.70
 -13  -2   1   56.89   15.40
  13   1  -1    3.90    3.90
   1 -13  -1    4.10    6.50
  13   1  -1    4.10    7.10
   1 -13  -1   -3.00    6.00
  -1  13   1    2.40    6.20
 -13  -1   1   -5.60    8.40
  13   1   1    4.40    6.70
  13   1   1    7.00    3.70
   0 -13   1   33.20    9.20
 -13   0   1   15.60    9.10
  13  -1  -1  694.13   52.09
  -1 -13  -1  679.23   48.90
  13  -1  -1  713.23   47.70
  -1 -13  -1  743.63   52.59
  13  -1   1  740.03   47.10
  13  -1   1  713.53   51.69
  -1 -13   1  638.04   51.49
 -13   1   1  733.13   51.59
  -1 -13   1  653.43   50.99
  13  -2  -1   23.40    5.50
  13  -2  -1   30.10    9.00
  -2 -13   1   36.10   11.90
 -13   2   1   19.60    7.70
  13  -2   1   20.50    4.50
  13  -2   1   12.40    8.40
  13  -3  -1  663.83   47.30
  -3 -13  -1  745.73   53.09
  -3 -13  -1  787.92   49.40
  13  -3  -1  669.83   51.39
  13  -3   1  671.53   46.50
  -3 -13   1  684.03   53.59
 -13   3   1  651.43   49.99
  13  -5  -1   29.30    6.30
  13  -5  -1   26.80   11.50
  -5 -13  -1   30.20   10.10
 -13   5   1   32.60    7.60
  13  -5   1   33.20    5.50
   5  13   1   13.60    5.60
  -5 -13   1   24.00   10.10
  13  -6  -1   -3.30    4.60
   6  13  -1   -0.60    4.20
   6  13   1   -4.90    4.10
 -13   6   1   -6.10    7.30
  13  -6   1   -4.40    3.60
  -6 -13   1    0.60    7.00
  13  -7  -1  574.14   39.80
   7  13  -1  555.84   37.20
   7  13   1  531.85   38.00
  13  -7   1  584.54   38.40
  -7 -13   1  521.25   43.50
  13  -8  -1    0.90    5.50
   8  13  -1   12.90    3.30
  -8 -13   1   12.50    9.90
   8  13   1   15.50    5.10
   9  13  -1  228.68   17.50
  13  -9  -1  226.98   20.90
   9  13   1  253.37   19.10
  -9 -13   1  266.87   27.60
  13  -9   1  250.27   19.60
  10  13  -1    1.20    3.00
  13 -10  -1   -4.20    5.80
  10  13   1    1.40    4.50
  13 -10   1   -4.90    4.50
  11  13  -1   20.10    4.30
  13 -11  -1   11.80    8.10
  13 -11   1   24.60    6.90
  11  13   1   22.80    6.30
  12  13  -1   34.50    5.40
  13 -12  -1   37.40    9.60
  13 -12   1   33.60    7.50
  12  13   1   31.40    6.70
  13 -13  -1   76.79   12.80
  13  13  -1   58.99    7.60
  13 -13   1   55.99    9.90
  13  13   1   64.99    9.00
  14  13  -1   41.90    7.00
  13 -14  -1   42.90   10.80
  14  13   1   46.00    7.40
  12 -14  -1    2.30    7.30
  14  12  -1    6.20    4.30
  14  12   1    3.00    4.60
  11 -14  -1   -3.60    7.80
  14  11  -1    6.50    4.30
  14  11   1    5.90    4.90
  14  10  -1    3.70    4.00
  10 -14  -1    2.20    6.60
  14  10   1    5.60    4.30
  14   9  -1   10.60    4.20
   9 -14  -1   22.00    7.80
  14   9   1   10.70    4.70
  14   8  -1   17.60    4.90
   8 -14  -1   20.40    7.40
  14   8   1   24.90    5.50
   7 -14  -1   15.00    7.10
  14   7   1   24.10    5.20
   6 -14  -1   -2.40    5.60
  14   6  -1    6.50    3.80
  14   6   1    1.90    3.80
   5 -14  -1    8.20    6.20
  14   5  -1   10.30    4.50
  14   5   1   10.30    4.20
  14   4  -1    0.30    3.90
   4 -14  -1    1.00    5.30
  14   4   1   -1.60    3.30
 -14  -4   1    6.20    8.50
  -4  14   1   -0.80    6.10
  14   3  -1   10.00    9.20
 -14  -3   1    9.60   10.30
  14   2  -1    0.90    5.60
  14   2  -1    2.40    4.20
   2 -14  -1    5.50    5.70
  14   2   1    3.00    3.50
  -2  14   1   -7.30    6.10
 -14  -2   1   -9.00    8.80
  14   1  -1   -3.80    3.70
   1 -14  -1    5.40    5.80
  14   1  -1   -3.60    6.10
  14   1   1   -4.80    3.10
 -14  -1   1   -7.30    7.70
  14   0  -1   12.10    7.80
  14   0  -1    3.90    4.70
   0 -14  -1   13.00    7.00
   0 -14  -1   16.30    9.00
  14   0   1   13.70    4.30
   0 -14   1    4.20    6.50
 -14   0   1    3.30    8.90
  14  -1  -1   52.29   12.20
  -1 -14  -1   57.29   13.10
  -1 -14  -1   58.19   10.20
  14  -1  -1   54.59    7.80
  14  -1   1   72.69    7.90
 -14   1   1   51.79   11.50
  -1 -14   1   52.09   10.50
  14  -2  -1    3.50    4.20
  -2 -14  -1    1.40    8.40
  -2 -14  -1   -1.60    6.60
 -14   2   1   -6.70    6.20
  14  -2   1    3.10    3.50
  -2 -14   1    0.60    9.00
  -3 -14  -1   20.30    8.30
  14  -3  -1   19.00    5.60
  -3 -14  -1   26.60   11.20
 -14   3   1   24.00   11.50
  14  -3   1   14.90    4.60
  -3 -14   1   39.80   14.20
  14  -4  -1   78.39    9.90
  -4 -14   1   69.69   14.80
  14  -4   1   57.49    8.50
  14  -5  -1  176.98   16.10
  14  -5   1  179.68   15.20
   5  14   1  185.38   15.20
  -5 -14   1  177.78   23.40
  14  -6  -1   31.40    8.10
   6  14   1   52.49    8.00
  14  -6   1   56.19    7.80
   7  14   1   25.80    6.00
  14  -7   1   33.20    6.30
  -7 -14   1   17.90    8.90
  14  -8  -1   -7.20    5.10
  -8 -14   1   29.10   11.80
  14  -8   1   -1.10    4.40
   8  14   1   -4.00    4.60
  14  -9  -1   38.10    8.70
  14  -9   1   30.70    6.90
   9  14   1   39.20    7.40
  14 -11  -1   20.50    8.50
  14 -11   1   26.10    7.50
  11  14   1   37.20    7.10
  14 -12  -1   16.30    8.40
  14 -12   1    8.10    6.30
  12  14   1    8.40    5.30
  14 -13  -1    4.40    8.00
  14 -13   1   -1.70    6.00
  13  14   1    2.60    5.00
  14 -14  -1    2.20    8.20
  14  14   1   -2.80    4.60
  14 -15  -1   15.10    9.60
  15  14   1   20.00    6.20
  13 -15  -1   -1.40    7.90
  15  13  -1   -5.70    5.20
  15  13   1    3.00    5.00
  15  12  -1    0.00    4.20
  12 -15  -1   -6.00    7.20
  15  12   1   -1.10    4.80
  11 -15  -1  190.28   19.40
  15  11  -1  151.18   14.10
  15  11   1  151.48   14.60
  10 -15  -1   17.50    8.50
  15  10  -1   17.50    5.30
  15  10   1   13.60    5.20
   9 -15  -1  169.38   18.90
  15   9  -1  181.48   15.10
  15   9   1  173.38   15.30
  15   8  -1   -3.30    3.80
   8 -15  -1    3.40    6.70
  15   8   1    2.00    4.30
  15   7  -1    5.80    4.10
   7 -15  -1   -2.30    6.00
  15   7   1    3.60    4.10
   6 -15  -1   12.40    6.70
  15   6  -1    8.60    4.70
  15   6   1   10.00    4.70
  15   5  -1  171.68   14.70
   5 -15  -1  146.19   16.60
  15   5   1  177.78   14.60
  15   4  -1   40.40    6.70
   4 -15  -1   33.50    8.20
  15   4   1   38.90    6.30
   3 -15  -1  341.67   27.20
  15   3  -1  353.26   25.70
  15   3   1  341.67   25.10
   2 -15  -1   -5.30    6.20
  15   2  -1   -2.60    3.90
  15   2   1   -3.20    3.50
  -2  15   1    0.30    7.40
  15   1  -1    3.60    4.20
   1 -15  -1    7.30    6.60
   1 -15   1   -1.30    6.70
  15   1   1    5.50    3.80
  -1  15   1   -2.40    8.30
   0 -15  -1  104.09   13.20
  15   0  -1   88.59   10.60
   0 -15   1  100.89   15.80
  15   0   1   96.69   10.00
  -1 -15  -1   45.10   10.10
  15  -1  -1   52.89    8.10
  -1 -15   1   54.79   13.20
  15  -1   1   56.49    7.90
  15  -2  -1   72.59    9.90
  -2 -15  -1   66.39   11.40
  -2 -15   1   59.69   15.50
  15  -2   1   62.79    8.70
  -3 -15  -1   -0.10    8.10
  15  -3  -1    1.90    4.90
  -3 -15   1   -2.80   12.90
  15  -3   1    4.20    3.90
  15  -4  -1    4.30    4.90
  -4 -15   1   32.10   11.90
   4  15   1   12.50    5.20
  15  -4   1    0.00    4.10
  15  -5  -1    3.70    5.70
   5  15   1    2.00    4.90
  15  -5   1   -1.80    4.40
  -5 -15   1   10.90    9.60
  15  -6  -1   24.70    7.20
  15  -6   1   21.20    6.10
   6  15   1   45.50    7.40
  -6 -15   1   27.80    9.60
  15  -7  -1   47.40    9.50
  -7 -15   1   45.30   12.60
  15  -7   1   60.79    8.40
   7  15   1   47.30    7.70
  15  -8  -1   57.79   10.60
  15  -8   1   93.09   11.20
   8  15   1   63.69    9.20
  15  -9  -1   17.80    7.90
  15  -9   1   20.60    6.60
   9  15   1   15.20    5.80
  15 -10  -1    1.90    6.80
  15 -10   1   16.80    6.80
  10  15   1   14.10    6.00
  15 -11  -1  126.39   16.60
  15 -11   1  107.59   14.50
  11  15   1  110.29   12.40
  15 -12  -1   -3.20    7.80
  15 -12   1    9.10    6.50
  12  15   1   -3.50    4.70
  15 -13  -1  234.88   23.80
  13  15   1  231.28   19.30
  15 -13   1  236.88   21.60
  15 -14  -1   -5.50    7.40
  14  15   1   -5.50    4.70
  15 -15  -1   15.50    9.40
  15  15   1   -2.30    4.90
  16  15   1   -0.80    5.30
  14 -16  -1    8.20    9.90
  16  14   1   -3.20    5.00
  13 -16  -1    7.90    8.40
  16  13   1    2.60    5.10
  16  12  -1    5.00    5.00
  12 -16  -1    3.90    8.50
  16  12   1    8.10    5.40
  16  11  -1   -1.30    4.60
  11 -16  -1    4.50    7.90
  16  11   1   -0.40    4.50
  10 -16  -1   -2.60    7.60
  16  10  -1   -2.00    4.50
  16  10   1   -6.30    4.20
  16   9  -1   41.80    7.40
   9 -16  -1   30.00   10.00
  16   9   1   56.09    8.00
   8 -16  -1   25.90    9.40
  16   8  -1   39.60    7.00
  16   8   1   45.70    7.30
  16   7  -1   63.99    8.50
   7 -16  -1   52.99   10.40
  16   7   1   63.49    8.50
   6 -16  -1   15.10    7.10
  16   6  -1   12.20    5.30
  16   6   1   30.60    5.90
  16   5  -1    2.80    4.60
   5 -16  -1    7.80    6.60
  16   5   1    4.50    4.30
   4 -16  -1   11.40    6.80
  16   4  -1   11.30    5.00
  16   4   1    1.30    4.00
  16   3  -1   10.40    5.40
   3 -16  -1   -0.20    7.10
  16   3   1   13.30    4.70
  16   2  -1   -3.70    4.60
   2 -16  -1   -4.90    6.50
  16   2   1    7.10    4.20
   1 -16  -1   33.60    9.00
  16   1  -1   28.50    6.80
  16   1   1   33.60    6.10
   1 -16   1   22.10    9.40
  16   0  -1   -6.80    4.40
   0 -16  -1    9.50    8.10
  16   0   1   -1.90    4.00
   0 -16   1    1.70    6.00
  -1 -16  -1  -12.00    6.90
  16  -1  -1    1.60    4.70
  16  -1   1   -0.30    4.00
  -1 -16   1    2.50    8.40
  -2 -16  -1    2.60    7.80
  16  -2  -1    1.60    4.90
  16  -2   1   -3.70    3.90
  -2 -16   1   -5.00    9.60
  16  -3  -1   -3.00    4.90
  16  -3   1    1.50    4.60
  -3 -16   1   10.20   13.70
  16  -4  -1    2.40    5.20
   4  16   1    8.20    5.50
  -4 -16   1   13.50   11.60
  16  -4   1    3.90    4.80
  16  -5  -1    6.50    5.80
  16  -5   1   -1.70    4.90
   5  16   1   -2.10    4.90
  -5 -16   1   -3.50    9.30
  16  -6  -1    1.90    6.10
   6  16   1    0.60    4.30
  16  -6   1   -8.90    4.60
  16  -7  -1    1.40    6.20
  16  -7   1   -1.90    4.70
   7  16   1   -1.60    5.20
  16  -8  -1   28.90    8.60
   8  16   1   19.40    6.80
  16  -8   1   25.30    7.10
  16  -9  -1   19.00    7.90
  16  -9   1    3.70    5.90
   9  16   1    5.10    6.00
  16 -10  -1   18.40    8.50
  10  16   1   23.90    7.80
  16 -10   1   16.00    7.40
  16 -11  -1    3.40    7.90
  11  16   1    2.30    8.30
  16 -11   1    5.40    6.80
  16 -12  -1   -2.10    7.90
  16 -12   1    4.90    6.90
  16 -13  -1    3.60    8.50
  16 -13   1    2.20    7.10
  16 -14  -1   17.20   10.00
  16 -15  -1   24.40   10.60
  17  15   1   66.29   10.00
  17  14   1   -6.20    5.40
  17  13   1   -3.80    5.30
  17  12  -1    0.70    5.20
  17  12   1    7.40    5.60
  17  11  -1    1.00    5.10
  17  11   1    1.40    5.10
  17  10  -1   29.80    6.80
  17  10   1   25.40    6.50
  17   9  -1    0.80    5.10
  17   9   1    2.40    4.90
  17   8  -1    8.80    5.40
  17   8   1   10.40    5.30
  17   7  -1   -2.10    4.60
  17   7   1    5.00    4.90
  17   6  -1   34.60    7.10
  17   6   1   23.70    6.30
  17   5  -1   41.40    7.80
  17   5   1   50.39    7.70
  17   4  -1   30.60    7.50
  17   4   1   40.40    6.90
  17   3  -1   22.50    6.50
  17   3   1   17.90    5.70
  17   2  -1   -3.80    4.90
   2 -17   1   -3.00    7.00
  17   2   1   -1.90    4.50
  17   1  -1   51.99    8.80
   1 -17   1   44.90   11.90
  17   0  -1    0.50    5.40
   0 -17   1    1.80    6.90
  17   0   1    6.50    4.80
  17  -1  -1  326.87   27.00
  17  -1   1  359.86   26.10
  -1 -17   1  350.86   35.90
  17  -2  -1    6.30    5.90
  17  -2   1    8.50    5.00
  -2 -17   1    9.90   11.80
  17  -3  -1   68.39   10.80
  17  -3   1   62.39    9.40
  -3 -17   1  117.59   21.70
  17  -4  -1   -4.70    5.80
  17  -4   1   -1.60    4.80
  17  -5  -1   62.59   10.90
  17  -5   1   62.69    9.70
  17  -6  -1    0.80    6.50
  17  -6   1    3.00    5.80
  17  -7  -1   80.99   12.60
  17  -7   1   79.09   11.10
  17  -8  -1   32.10    9.80
  17  -8   1   28.30    8.00
  17  -9  -1   25.20    9.40
  17  -9   1   25.80    8.10
  17 -10  -1   -5.80    8.20
  17 -10   1   -4.30    6.40
  17 -11  -1   -0.80    8.60
  17 -11   1    9.40    7.40
  17 -12  -1   40.60   11.10
  17 -12   1   44.70    9.90
  17 -13  -1   -1.10    8.80
  17 -13   1    1.10    8.50
  17 -14  -1   13.90   10.40
  17 -15  -1   -3.20    9.20
  18  14   1   -1.30    5.60
  18  13   1    2.50    5.70
  18  12  -1   -1.60    5.40
  18  12   1    3.00    5.60
  18  11  -1   -2.50    5.20
  18  11   1   -1.90    5.00
  18  10  -1   16.70    6.30
  18  10   1   -3.90    4.70
  18   9  -1    1.40    5.30
  18   9   1    1.00    5.00
  18   8  -1    7.20    5.70
  18   8   1   -3.50    4.70
  18   7  -1    2.30    5.50
  18   7   1   -2.40    4.80
  18   6  -1   14.70    6.40
  18   6   1    9.20    5.70
  18   5  -1    3.70    5.70
  18   5   1    3.30    5.30
  18   4  -1    1.20    5.70
  18   4   1    4.60    5.30
  18   3  -1    1.40    6.20
  18   3   1    6.70    5.30
  18   2  -1    7.00    6.30
   2 -18   1   32.00   10.80
  18   2   1   13.10    5.60
  18   1  -1    9.50    6.90
   1 -18   1    5.10    7.60
  18   1   1   18.10    6.00
  18   0  -1   -4.60    5.30
  18   0   1    0.90    4.90
   0 -18   1    0.20   10.00
  18  -1  -1    3.40    6.30
  18  -1   1    4.50    5.40
  18  -2  -1   14.40    7.10
  18  -2   1    5.00    5.60
  18  -3  -1   59.89   10.90
  18  -3   1   75.79   10.40
  18  -4  -1   11.80    7.70
  18  -4   1   11.30    6.30
  18  -5  -1   39.30    9.90
  18  -5   1   41.50    8.80
  18  -6  -1   13.40    8.00
  18  -6   1    8.20    6.40
  18  -7  -1   -1.70    7.50
  18  -7   1    1.80    6.40
  18  -8  -1    1.80    8.00
  18  -8   1   -3.00    6.30
  18  -9  -1    6.80    7.90
  18  -9   1   -2.40    6.30
  18 -10  -1    3.90    8.60
  18 -10   1   -3.40    6.70
  18 -11  -1   -2.80    8.70
  18 -11   1    0.20    7.30
  18 -12  -1    1.40    9.30
  18 -12   1    2.50    7.70
  18 -13  -1   -4.70    9.10
  18 -14  -1   -3.80    9.70
  19  12  -1    0.60    6.40
  19  12   1   -3.20    5.60
  19  11  -1  103.49   14.40
  19  11   1  127.19   14.40
  19  10  -1   19.00    7.00
  19  10   1    9.90    6.40
  19   9  -1   70.99   10.80
  19   9   1   72.39   10.20
  19   8  -1   -0.10    5.80
  19   8   1    4.80    5.60
  19   7  -1    7.60    6.40
  19   7   1    7.90    5.80
  19   6  -1   18.10    7.20
  19   6   1   38.10    7.70
  19   5  -1   66.89   10.80
  19   5   1   72.09   10.30
  19   4  -1   44.30    9.20
  19   4   1   46.90    8.60
  19   3  -1   30.90    8.40
  19   3   1   29.00    7.50
  19   2  -1    7.70    6.90
  19   2   1    6.90    5.90
  19   1  -1   -0.80    6.40
  19   1   1    1.20    5.80
  19   0  -1   45.00    9.70
  19   0   1   50.69    9.00
  19  -1  -1   12.20    7.30
  19  -1   1    9.70    6.40
  19  -2  -1    5.50    7.20
  19  -2   1    1.20    5.90
  19  -3  -1   25.80    8.60
  19  -3   1   26.60    7.90
  19  -4  -1    3.30    7.00
  19  -4   1    4.60    6.30
  19  -5  -1   49.99   10.80
  19  -5   1   40.80    9.10
  19  -6  -1   -5.70    7.40
  19  -6   1   16.20    7.30
  19  -7  -1  116.39   16.10
  19  -7   1  112.79   15.90
  19  -8  -1   -0.10    8.30
  19  -8   1   10.30    7.60
  19  -9  -1   -5.20    8.10
  19  -9   1   -0.70    7.00
  19 -10  -1    4.10    9.20
  19 -10   1    6.50    8.20
  19 -11  -1   83.89   15.40
  19 -11   1   93.29   14.20
  19 -12  -1   17.70   10.30
  19 -12   1   24.60    9.70
  20  11  -1   -2.80    6.40
  20  11   1    4.00    6.40
  20  10  -1   11.50    7.40
  20  10   1    7.00    6.30
  20   9  -1   17.70    8.50
  20   9   1   39.60    8.30
  20   8  -1    4.90    7.00
  20   8   1    2.70    6.10
  20   7  -1   16.10    7.80
  20   7   1   21.10    7.20
  20   6  -1    5.40    6.90
  20   6   1    4.80    6.20
  20   5  -1   -0.70    6.50
  20   5   1    1.70    6.00
  20   4  -1   -0.10    6.80
  20   4   1    3.80    6.20
  20   3  -1   -0.30    6.70
  20   3   1    0.90    6.00
  20   2  -1   -0.70    7.10
  20   2   1    2.60    6.20
  20   1  -1    4.20    7.40
  20   1   1    0.80    6.20
  20   0  -1   -5.00    6.90
  20   0   1   -3.90    6.00
  20  -1  -1   -5.60    6.70
  20  -1   1   -6.50    6.10
  20  -2  -1    5.80    7.60
  20  -2   1    3.00    6.90
  20  -3  -1   -0.20    7.30
  20  -3   1    3.30    7.00
  20  -4  -1    3.00    7.90
  20  -4   1   11.40    7.20
  20  -5  -1    7.60    8.60
  20  -5   1    3.30    7.00
  20  -6  -1   -6.80    7.80
  20  -6   1   -1.70    7.10
  20  -7  -1    0.90    8.80
  20  -7   1    5.20    7.50
  20  -8  -1   -0.70    9.30
  20  -8   1    2.50    8.00
  20  -9  -1    2.70    9.00
  20  -9   1    8.50    8.20
  20 -10  -1    2.80    9.00
  20 -10   1    2.50    8.30
  20 -11  -1    0.80    9.20
  20 -11   1    4.10    7.90
  21   9  -1   34.10    9.50
  21   9   1   32.90    8.40
  21   8  -1    2.70    7.40
  21   8   1   -5.80    5.80
  21   7  -1   34.60    9.60
  21   7   1   33.90    8.60
  21   6  -1    5.10    7.50
  21   6   1   14.60    7.10
  21   5  -1  122.49   17.20
  21   5   1  154.68   16.70
  21   4  -1   -3.60    7.20
  21   4   1    7.50    7.10
  21   3  -1    0.90    7.60
  21   3   1   -5.10    6.30
  21   2  -1   10.60    8.10
  21   2   1    0.90    6.80
  21   1  -1  101.39   14.90
  21   1   1  104.79   14.80
  21   0  -1   50.09   10.70
  21   0   1   38.60    9.70
  21  -1  -1   83.99   13.70
  21  -1   1   70.79   12.50
  21  -2  -1    6.80    8.50
  21  -2   1   -1.80    7.40
  21  -3  -1   -1.40    8.30
  21  -3   1   -5.40    7.30
  21  -4  -1    3.50    9.00
  21  -4   1    3.40    7.80
  21  -5  -1    1.90    9.10
  21  -5   1   11.50    8.40
  21  -6  -1   27.70   10.60
  21  -6   1   20.40    9.10
  21  -7  -1    4.20    9.50
  21  -7   1   -1.80    7.50
  21  -8  -1    4.60   10.00
  21  -8   1    6.10    8.00
  21  -9  -1   -0.90    9.60
  21  -9   1   10.00    9.00
  22   6  -1    2.70    7.60
  22   6   1   -6.20    6.30
  22   5  -1    6.60    8.30
  22   5   1    5.10    7.10
  22   4  -1    3.90    8.30
  22   4   1   -0.20    6.80
  22   3  -1   19.00   10.00
  22   3   1   36.70    9.50
  22   2  -1    3.80    8.30
  22   2   1    4.90    7.80
  22   1  -1   11.50    9.10
  22   1   1   15.70    8.80
  22   0  -1   -9.50    7.70
  22   0   1    5.70    8.20
  22  -1  -1   15.20    9.80
  22  -1   1   15.70    9.20
  22  -2  -1    2.40    9.70
  22  -2   1    5.30    8.60
  22  -3  -1   15.50   10.20
  22  -3   1   13.80    8.90
  22  -4  -1   -6.00    9.50
  22  -4   1    2.10    8.30
  22  -5  -1    9.90   10.40
  22  -5   1    0.70    8.00
  22  -6  -1    5.30    9.60
  22  -6   1   -3.30    8.20
   0   0  -2 2414.16  155.48
   0  -1  -2  352.96   26.80
   1   0  -2  351.76   26.50
   0   1  -2  469.65   26.90
   1  -1  -2  167.58   12.10
   1   1  -2  133.59   11.30
   1  -2  -2 1069.59   69.29
  -2  -1  -2 1056.79   69.49
   2   1  -2  991.00   68.59
  -1   2  -2  996.50   68.69
   2   1  -2 1187.38   69.09
  -1   2   2 1036.60   68.59
   2   0  -2  302.97   20.20
   2   0  -2  302.27   20.20
   0   2  -2  269.97   20.30
  -2   0   2  286.87   20.40
   1   2  -2  856.51   58.49
  -2   1  -2  911.41   59.09
  -1  -2  -2  877.71   59.49
   2  -1  -2  970.40   59.09
  -2   1   2  883.01   58.79
  -2  -2  -2   99.19   10.60
   2   2  -2   96.29    9.10
  -2   2  -2  110.19    9.60
   2  -2  -2  108.39    9.40
   2   2  -2  112.79    8.40
  -2   2   2  112.29   10.00
  -2  -2   2   90.49    8.90
   2  -3  -2  182.38   15.00
   3   2  -2  217.08   15.50
   2  -3  -2  209.78   15.20
  -3  -2  -2  192.18   16.00
   3   2  -2  208.58   14.00
  -2   3   2  184.68   15.30
  -3  -2   2  191.38   15.10
  -3  -1  -2  778.82   50.49
   3   1  -2  708.93   49.30
   3   1  -2  710.43   49.99
   1  -3  -2  833.52   50.39
   1  -3  -2  798.62   49.60
  -1   3  -2  751.92   49.30
  -1   3   2  782.92   49.70
  -3  -1   2  673.03   49.80
   3   0  -2   62.39    7.30
   0  -3  -2   39.00    6.40
   0  -3  -2   70.59    7.90
   0   3  -2   47.40    6.10
   3   0  -2   70.69    6.30
   0   3   2   55.49    6.50
   2   3  -2   90.79    7.80
   3  -2  -2  105.79    9.20
   2   3  -2   92.39    9.00
  -2  -3  -2   86.79    9.90
  -2  -3   2   91.99    9.00
  -3   2   2  101.49    8.60
   3   3  -2 1311.97   89.89
   3  -3  -2 1380.66   90.89
  -3  -3  -2 1341.97   91.39
   3  -3  -2 1521.55   91.19
   3   3  -2 1623.14   91.69
   3  -3   2 1342.77   89.69
   3   3   2 1277.07   90.49
  -3  -3   2 1368.06   91.29
   3  -4  -2   48.10    6.80
   3  -4  -2   60.99    7.90
   4   3  -2   66.09    7.90
  -4  -3   2   58.59    7.70
   4   3   2   82.49    7.30
  -3   4   2   67.39    8.40
   3  -4   2   69.29    7.10
   2  -4  -2  231.88   17.90
   4   2  -2  267.17   18.60
   4   2  -2  252.67   16.80
  -4  -2  -2  246.28   18.70
   2  -4  -2  223.88   17.60
  -2   4   2  221.38   18.00
  -4  -2   2  244.18   18.10
   2  -4   2  225.98   15.90
   1  -4  -2  499.35   33.00
   4   1  -2  472.85   33.10
   1  -4  -2  493.85   32.40
   4   1  -2  472.45   31.90
  -4  -1   2  449.36   32.70
   0  -4  -2  369.26   29.80
   4   0  -2  457.15   30.20
   4   0  -2  447.86   29.00
   0  -4  -2  389.16   29.20
   4   0   2  410.96   28.70
   0   4   2  482.25   29.70
  -4   0   2  446.26   30.20
   4  -1  -2  324.77   21.00
   4  -1  -2  302.07   22.00
   1   4  -2  298.07   20.10
   4  -1   2  292.97   20.40
  -4   1   2  295.77   22.10
  -1  -4   2  280.97   21.60
   4  -2  -2   63.99    8.00
   4  -2  -2   75.19    7.10
   2   4  -2   56.09    5.80
  -2  -4  -2   84.49    7.70
  -2  -4  -2   57.19    8.40
  -4   2   2   49.20    7.40
  -2  -4   2   72.89    7.80
   4  -2   2   65.99    5.80
  -3  -4  -2   55.09    7.70
   4  -3  -2   59.59    6.80
  -3  -4  -2   70.89    9.00
   4  -3  -2   63.19    8.30
  -3  -4  -2   54.39    6.90
  -3  -4   2   59.79    8.00
   4  -3   2   67.29    5.30
  -4   3   2   72.89    9.90
  -4  -4  -2   46.50    6.50
   4   4  -2   66.59    7.80
  -4  -4  -2   59.89    8.00
   4   4  -2   50.29    5.30
   4  -4   2   41.20    6.40
   4  -4   2   47.20    4.60
   4   4   2   47.30    6.60
  -4   4   2   63.19    9.20
   4  -5  -2  170.08   13.00
   4  -5  -2  171.18   13.70
  -5  -4  -2  138.19   12.40
  -5  -4  -2  134.79   13.90
   5   4  -2  143.79   11.20
   5   4  -2  157.48   13.70
  -5  -4   2  161.48   13.80
   5   4   2  139.09   12.70
   4  -5   2  154.68   12.40
   4  -5   2  138.59   10.20
   3  -5  -2  189.68   15.60
   5   3  -2  195.38   16.30
   3  -5  -2  193.88   15.70
  -5  -3  -2  210.38   15.30
   5   3   2  193.38   15.30
   3  -5   2  190.08   13.30
  -3   5   2  217.58   16.70
  -5  -3   2  208.58   16.50
   3  -5   2  196.58   15.30
   5   2  -2   85.69    7.30
  -5  -2  -2   69.79    7.00
   2  -5  -2  100.29    9.10
   5   2  -2   74.09    8.90
  -2   5   2   89.09    9.40
  -5  -2   2   68.59    8.80
   5   2   2   76.49    7.50
   2  -5   2   66.69    8.10
   5   2   2   71.69    6.90
   1  -5  -2  262.07   19.30
   5   1  -2  260.07   18.70
   1  -5  -2  238.78   19.80
   5   1  -2  315.27   20.90
   5   1   2  246.98   18.40
  -5  -1   2  264.67   20.00
  -1   5   2  267.67   19.70
   5   0  -2   16.30    3.50
   5   0  -2   15.70    4.70
   0  -5  -2    7.10    3.20
   0  -5  -2   11.50    4.60
  -5   0   2   14.60    4.50
   5   0   2   16.60    3.10
  -1  -5  -2  238.98   18.50
   5  -1  -2  227.88   18.30
   5  -1  -2  232.08   17.10
  -1  -5  -2  274.27   18.20
   5  -1   2  207.18   17.30
   5  -1   2  222.18   16.40
  -1  -5   2  268.07   19.00
  -5   1   2  227.08   18.70
  -2  -5  -2  319.37   25.10
  -2  -5  -2  344.17   24.90
   5  -2  -2  366.66   24.20
  -2  -5   2  344.07   25.00
   5  -2   2  350.96   23.30
   3   5  -2  111.49   10.90
   5  -3  -2  103.89   11.00
   5  -3  -2   96.59   10.00
   3   5  -2  128.29    8.60
   5  -3   2  117.59    8.60
   5  -3   2  110.99    9.30
  -3  -5   2  102.29   11.00
   5  -4  -2   14.60    4.80
  -4  -5  -2   12.50    3.80
   4   5  -2   20.40    3.10
  -4  -5  -2   15.90    5.20
   4   5  -2   18.00    4.70
   5  -4  -2   11.50    4.00
  -4  -5   2   21.50    5.10
   4   5   2   14.00    3.70
   5  -4   2   20.00    4.00
  -5   4   2   13.30    5.40
   5  -4   2   16.30    2.50
   5   5  -2  115.29   11.30
   5  -5  -2   85.39    9.90
   5  -5  -2  101.29   11.10
  -5  -5  -2  103.29   10.70
  -5   5  -2   87.09   10.10
   5   5   2  106.49   10.40
   5  -5   2  102.29    9.70
  -6  -5  -2   22.70    5.10
   5  -6  -2   22.30    5.60
   6   5  -2   28.60    6.30
   6   5  -2   18.20    3.70
   5  -6  -2   20.70    5.90
  -5   6   2   19.10    6.80
   6   5   2   20.80    5.20
   6   5   2   17.30    4.00
   5  -6   2   20.20    2.50
   5  -6   2   24.20    5.00
  -6  -5   2   23.80    6.10
   6   4  -2   58.59    8.70
   4  -6  -2   53.29    7.80
   6   4  -2   55.59    5.60
  -6  -4  -2   41.60    7.60
   6   4   2   42.70    7.50
   6   4   2   50.79    6.40
  -4   6   2   59.29   10.50
  -6  -4   2   63.99    8.90
   4  -6   2   62.69    8.20
   4  -6   2   50.09    4.20
   6   3  -2  472.95   30.70
  -6  -3  -2  419.76   31.50
   6   3  -2  471.85   33.10
   3  -6  -2  435.46   31.80
   3  -6  -2  451.35   32.00
  -6  -3   2  456.75   32.90
   3  -6   2  445.46   29.50
   6   3   2  482.25   31.10
   3  -6   2  483.85   31.90
  -3   6   2  452.95   32.50
   6   3   2  449.06   32.00
   6   2  -2  116.89   11.70
   6   2  -2  134.69    9.80
   2  -6  -2  105.59   11.70
   2  -6  -2  116.89   11.00
   2  -6   2  120.89   11.10
  -6  -2   2  115.59   11.90
  -2   6   2  129.39   11.70
   6   2   2  119.99   10.70
   6   2   2  108.09    9.60
   6   1  -2  239.48   17.20
   1  -6  -2  228.78   18.10
   6   1  -2  271.17   19.70
   1  -6  -2  236.68   18.60
  -6  -1   2  235.18   19.00
   6   1   2  227.58   17.70
   6   1   2  265.67   17.30
  -1   6   2  230.18   18.80
   6   0  -2  197.58   17.00
   6   0  -2  205.88   15.20
   6   0   2  205.48   15.30
   6   0   2  220.38   14.80
   0  -6   2  172.88   15.60
  -6   0   2  241.68   18.00
   0  -6   2  191.98   16.10
   6  -1  -2    3.80    2.80
  -1  -6  -2    7.10    4.20
  -1  -6  -2    5.70    4.70
   6  -1  -2    3.60    3.80
  -1  -6   2    6.30    4.50
   6  -1   2    5.90    3.00
  -6   1   2    5.60    5.00
   6  -1   2    8.50    2.40
   1   6   2   -0.60    2.40
   6  -2  -2   34.50    5.70
  -2  -6  -2   46.80    8.10
   6  -2  -2   44.90    8.10
  -6   2   2   46.00    7.60
   6  -2   2   50.39    6.90
   2   6   2   41.40    6.60
   6  -2   2   33.50    4.60
  -6   3  -2  137.29   10.70
   6  -3  -2  144.49   11.30
   6  -3  -2  114.39   12.70
   3   6  -2  126.29    9.10
  -3  -6  -2  116.39   12.50
  -3  -6  -2  114.19   12.50
   6  -3   2  137.59   11.00
   6  -3   2  110.69    9.40
  -6   3   2  106.29   13.70
  -4  -6  -2  192.58   17.40
   4   6  -2  219.38   18.20
   4   6  -2  236.38   15.20
   6  -4  -2  199.78   16.60
  -6   4  -2  226.48   16.60
   6  -4  -2  210.08   18.30
  -4  -6  -2  209.88   18.20
  -4  -6   2  229.08   18.90
   6  -4   2  240.18   16.80
   6  -4   2  210.58   15.10
  -6   4   2  223.98   19.10
   5   6  -2  249.48   17.40
  -5  -6  -2  260.27   20.20
   5   6  -2  244.08   20.30
  -6   5  -2  246.98   18.90
   6  -5  -2  272.37   19.30
   6  -5  -2  269.07   20.90
  -5  -6  -2  252.57   20.60
  -6   5   2  255.17   21.30
   6  -5   2  240.18   16.90
   5   6   2  235.78   19.40
   6  -5   2  252.47   19.00
  -5  -6   2  238.38   20.90
  -6  -6  -2   28.70    6.40
   6   6  -2   24.10    6.50
   6   6  -2   24.20    3.70
  -6   6  -2   17.50    5.20
   6  -6  -2   22.60    5.40
   6  -6   2   26.20    5.50
  -6   6   2   27.50    7.30
   6  -6   2   21.80    2.90
   6   6   2   18.90    4.20
  -6  -6   2   31.80    7.40
   6   6   2   28.70    6.00
  -6   7  -2    0.50    4.80
   6  -7  -2   -3.40    4.90
   6  -7  -2    3.70    4.70
   7   6  -2    3.60    4.60
   7   6  -2    4.70    2.80
  -7  -6  -2    7.80    4.00
  -7  -6   2    6.00    6.20
  -6   7   2   20.50    7.40
   7   6   2   16.10    4.60
   7   6   2    9.90    3.80
   6  -7   2   -2.50    4.40
   6  -7   2    1.90    1.90
   7   5  -2  754.62   51.89
   5  -7  -2  798.62   50.29
   7   5  -2  750.72   48.60
  -7  -5  -2  709.23   50.49
   5  -7  -2  698.93   50.49
   5  -7   2  744.63   49.99
   7   5   2  713.63   49.10
   7   5   2  703.53   50.69
  -5   7   2  768.92   51.39
   5  -7   2  719.13   47.60
  -7  -5   2  752.32   51.89
   4  -7  -2   67.89    9.70
   4  -7  -2   85.39   10.10
  -7  -4  -2   68.39    9.50
   7   4  -2   96.89   11.10
   4  -7   2   67.39    9.70
   7   4   2   71.89    7.90
  -4   7   2   73.19   12.20
   7   4   2   72.59    9.20
   4  -7   2   81.69    5.70
   7   3  -2  745.73   52.49
  -7  -3  -2  697.63   50.79
   3  -7  -2  761.52   51.29
   3  -7  -2  749.53   51.39
   7   3  -2  798.32   49.99
   7   3   2  734.63   51.49
   7   3   2  753.12   50.19
   3  -7   2  768.62   51.29
  -7  -3   2  818.12   52.79
  -3   7   2  746.53   51.79
   2  -7  -2   12.70    3.80
   7   2  -2    7.00    4.30
   2  -7  -2   16.30    4.80
   7   2  -2    5.60    3.00
   7   2   2   10.20    3.90
   7   2   2    7.60    2.80
  -7  -2   2    4.50    4.30
  -2   7   2   11.80    4.80
  -7  -1  -2   78.29    9.30
   1  -7  -2   95.49   10.50
   7   1  -2   94.29   11.60
   1  -7  -2   84.69    9.80
   7   1  -2   81.29    8.30
  -1   7   2  101.99   11.40
   7   1   2   78.59    9.30
  -7  -1   2  113.79   13.60
   1  -7   2   99.99   11.00
   7   1   2   84.99    8.20
   0  -7  -2    2.20    3.70
   7   0  -2    1.60    2.60
  -7   0  -2    1.40    2.70
   0  -7  -2   -8.70    5.10
   7   0  -2    2.30    4.10
   7   0   2    5.90    3.60
   0   7   2    0.10    3.70
  -7   0   2    8.60    6.00
   0  -7   2    9.20    3.70
   7   0   2    3.60    2.50
  -7   1  -2  651.93   38.70
   7  -1  -2  493.75   38.30
  -1  -7  -2  494.55   39.60
   7  -1   2  528.95   38.80
   7  -1   2  567.54   37.90
  -7   1   2  680.33   41.10
  -2  -7  -2   44.40    7.30
   7  -2  -2   58.49   10.20
  -2  -7  -2   67.19    9.10
  -7   2  -2   58.89    7.50
   7  -2  -2   64.79    7.60
  -2  -7  -2   63.09   10.00
   7  -2   2   68.79    6.30
   7  -2   2   61.69    9.00
  -7   2   2   79.79    9.70
  -3  -7  -2   68.39   10.40
   4   7  -2   67.09   10.40
  -4  -7  -2   75.99   10.50
   7  -4   2   70.59    6.20
  -5  -7  -2   55.79    9.60
  -6  -7  -2  263.67   21.90
   7  -6  -2  287.17   22.20
   7  -6  -2  249.68   20.40
  -7   6  -2  284.57   20.60
   7  -6   2  268.57   20.60
   6   7   2  241.08   19.10
   6   7   2  248.88   21.00
   7  -6   2  247.28   17.70
  -7   7  -2  186.78   16.00
   7   7  -2  159.48   12.60
   7   7  -2  167.78   16.50
   7  -7  -2  157.78   15.00
   7  -7  -2  159.28   16.60
  -7  -7  -2  149.29   15.50
   7   7   2  159.48   15.80
   7   7   2  160.08   13.60
  -7  -7   2  186.28   18.70
  -7   7   2  158.48   19.00
   7  -7   2  161.28   11.90
   7  -7   2  179.48   15.60
  -7   8  -2  176.58   17.90
   7  -8  -2  208.48   19.70
   8   7  -2  179.78   14.00
   8   7  -2  191.28   21.20
  -8  -7  -2  173.78   16.90
   8   7   2  176.58   17.30
   7  -8   2  196.08   13.30
   8   7   2  170.98   14.90
   7  -8   2  162.08   16.80
   8   6  -2   77.39   11.60
  -8  -6  -2   73.09   11.20
   6  -8  -2   70.89   11.10
   6  -8  -2   82.29   10.10
   8   6  -2   75.39    7.90
   8   6   2   72.99   10.40
   8   6   2   65.89    8.80
  -6   8   2   77.49   14.40
  -8  -6   2  104.29   15.10
   6  -8   2   80.39    6.80
   6  -8   2   71.59   10.80
  -8  -5  -2   56.79   10.00
   5  -8  -2   73.09    9.80
   8   5  -2   66.39   10.80
   8   5  -2   60.09    6.90
   5  -8   2   59.99   10.00
  -8  -5   2   71.89   10.90
   8   5   2   61.99    9.50
   5  -8   2   56.29    5.40
   8   5   2   50.39    7.00
  -8  -4  -2   56.09    9.20
   8   4  -2   60.59   10.40
   4  -8  -2   63.89    8.80
   8   4  -2   73.49    7.30
   4  -8  -2   54.69    9.10
   8   4   2   58.09    6.90
   4  -8   2   60.29    9.90
  -4   8   2   60.39    9.30
  -8  -4   2   77.19   11.20
   8   4   2   66.59    9.10
   4  -8   2   64.59    5.30
   8   3  -2  487.05   37.20
   3  -8  -2  488.55   35.80
   8   3  -2  528.75   34.40
  -8  -3  -2  487.25   35.50
   3  -8  -2  544.65   36.40
   8   3   2  509.35   36.20
  -3   8   2  485.85   36.70
   8   3   2  522.55   34.50
  -8  -3   2  488.65   37.50
   3  -8   2  535.75   36.30
   2  -8  -2  201.58   17.50
   8   2  -2  224.18   16.10
  -8  -2  -2  203.48   17.40
   8   2  -2  221.28   19.00
   2  -8  -2  200.78   18.30
   8   2   2  228.98   16.10
   2  -8   2  228.18   18.40
   8   2   2  220.98   17.90
  -2   8   2  216.28   19.70
  -8  -2   2  220.38   19.90
  -8  -1  -2  534.05   38.20
   1  -8  -2  518.85   38.60
   8   1  -2  555.94   40.30
   1  -8  -2  574.44   39.20
   8   1  -2  560.74   37.50
  -8  -1   2  585.74   41.30
   8   1   2  560.94   37.30
   8   1   2  569.74   38.90
  -8   0  -2   47.00    7.90
   0  -8  -2   96.89   11.80
   8   0  -2   67.99   11.40
   8   0  -2   70.09    7.30
   0  -8   2   65.19    9.70
   8   0   2   61.19    6.70
   8   0   2   52.39    8.70
   8  -1  -2   27.90    4.80
   8  -1  -2   21.90    6.20
  -8   1  -2   32.50    6.30
   8  -1   2   26.50    4.00
   8  -1   2   23.80    5.60
  -2  -8  -2   67.19   11.90
  -8   3  -2   80.99    9.50
  -3  -8  -2   78.99   10.70
   8  -3  -2   97.69   14.40
   8  -3  -2   60.69    9.10
  -3  -8  -2   79.49   12.20
  -3  -8  -2   77.79   12.60
   8  -3   2   91.29   10.60
   8  -3   2   70.09    6.90
  -8   3   2   72.69   13.20
   8  -4  -2  174.28   17.10
  -4  -8  -2  207.88   17.60
   8  -4  -2  160.08   14.70
   4   8  -2  173.88   12.30
  -8   4  -2  144.09   15.10
  -4  -8  -2  186.78   17.00
   8  -4   2  153.88   15.40
  -4  -8   2  194.58   17.80
   8  -4   2  157.38   12.50
  -8   4   2  215.88   17.80
   5   8  -2   -0.80    2.00
   8  -5  -2   -1.60    4.10
  -8   5  -2   -4.80    3.90
   5   8  -2   -2.20    4.20
   8  -5  -2   -1.60    4.40
  -5  -8  -2    5.40    4.70
  -5  -8  -2   -5.10    6.50
  -5  -8   2    6.90    6.10
   8  -5   2   -0.30    1.90
   8  -5   2   -5.90    4.30
  -8   5   2   -6.30    5.50
   8  -6  -2   26.00    7.30
   6   8  -2   21.00    3.70
  -8   6  -2   18.00    5.70
   6   8  -2   26.50    8.30
  -8   6   2   25.10    8.20
   8  -6   2   24.60    3.50
   8  -6   2   22.70    6.30
  -6  -8   2   28.90    8.80
  -8   7  -2   31.10    6.90
   8  -7  -2   17.30    7.20
   7   8  -2   30.20    4.40
   8  -7  -2    8.60    6.80
  -7  -8  -2   35.10    8.60
  -7  -8   2   31.70    8.70
   7   8   2   19.10    6.90
   7   8   2   18.20    5.40
  -8   7   2   16.50    8.80
   8  -7   2   24.10    3.60
   8  -7   2    6.90    7.00
  -8   8  -2  199.28   19.20
   8  -8  -2  208.58   20.50
  -8  -8  -2  196.68   18.90
   8   8  -2  197.08   15.40
   8  -8  -2  199.18   18.20
   8   8   2  203.38   16.70
   8   8   2  208.08   19.30
   8  -8   2  209.38   15.10
   8  -8   2  253.77   19.30
  -8   8   2  183.68   22.40
   8  -9  -2    5.70    6.10
  -9  -8  -2    3.10    5.40
   8  -9  -2   -1.10    9.30
   9   8  -2    8.00    3.90
  -9  -8   2    6.50    8.00
   8  -9   2    3.40    3.00
   8  -9   2   -0.80    5.90
   9   8   2    5.50    4.00
   9   8   2    0.90    5.00
  -8   9   2   -0.20    7.50
  -9  -7  -2  187.28   18.20
   7  -9  -2  170.98   18.40
   7  -9  -2  155.98   16.60
   9   7  -2  166.28   13.60
   9   7   2  182.28   17.40
  -7   9   2  154.88   19.90
   7  -9   2  165.58   16.60
   9   7   2  180.28   14.40
   7  -9   2  170.88   12.80
  -9  -7   2  169.88   19.30
   9   6  -2  249.08   18.20
  -9  -6  -2  233.58   21.10
   9   6  -2  241.58   23.40
   6  -9  -2  253.77   20.60
   6  -9  -2  238.58   21.00
   6  -9   2  233.88   17.20
   6  -9   2  254.27   20.80
   9   6   2  234.58   20.80
   9   6   2  236.78   18.50
  -6   9   2  234.88   23.10
  -9  -6   2  281.77   23.70
  -9  -5  -2  294.47   23.90
   9   5  -2  301.17   25.40
   5  -9  -2  359.16   24.40
  -9  -5   2  306.47   26.60
   5  -9   2  274.67   20.20
   9   5   2  283.07   23.90
   5  -9   2  298.57   24.10
   9   5   2  283.47   21.80
   4  -9  -2  237.48   21.10
   4  -9  -2  260.07   21.20
   9   4  -2  275.37   18.90
  -9  -4  -2  256.27   20.80
   9   4  -2  270.97   22.50
  -4   9   2  248.88   22.90
   9   4   2  273.27   21.50
   4  -9   2  239.38   21.30
   9   4   2  261.17   19.10
   3  -9  -2  128.29   13.00
   2  -9  -2   -0.10    3.70
   2  -9  -2   -5.80    4.30
   9   2  -2    5.80    4.00
  -9  -2  -2   10.00    4.40
  -2   9   2   -1.60    6.50
   9   2   2    2.60    4.20
   9   2   2    7.80    3.20
   2  -9   2    7.90    4.90
  -9  -2   2    8.60    6.10
   1  -9  -2  217.98   17.20
  -9  -1  -2  206.98   16.70
   9   1  -2  191.78   15.30
   9   1  -2  205.08   19.70
   9   1   2  196.38   15.20
   9   1   2  188.58   17.40
  -9  -1   2  196.48   22.10
   0  -9  -2  162.88   16.00
   9   0  -2  152.28   12.90
  -9   0  -2  165.68   14.00
   0  -9  -2  129.19   15.60
   9   0   2  147.79   12.40
   0  -9   2  189.28   15.90
   9   0   2  157.88   14.80
  -1  -9  -2  554.64   40.00
   9  -1  -2  528.45   37.70
  -1  -9  -2  544.35   39.60
   9  -1  -2  538.75   40.40
  -9   1  -2  529.45   38.30
  -9   1   2  638.64   41.40
   9  -1   2  536.75   37.10
   9  -1   2  550.34   39.20
  -1  -9   2  580.14   40.50
  -2  -9  -2   54.19    9.30
   9  -2  -2   50.29    7.90
  -9   2  -2   72.99    9.90
  -2  -9  -2   91.99   13.10
   9  -2  -2   73.39   11.80
   9  -2   2   49.90    6.50
   9  -2   2   64.09   10.60
  -3  -9  -2   68.89   11.20
   9  -3  -2   49.90    9.30
  -3  -9  -2   54.49    9.40
  -9   3  -2   56.79    7.90
   9  -3  -2   47.10    7.30
   9  -3   2   54.89    8.80
  -3  -9   2   64.39   10.90
  -9   3   2   55.19    9.90
   9  -3   2   45.20    5.80
  -9   4  -2   25.00    6.10
  -4  -9  -2   36.40    9.20
   9  -4  -2   32.50    9.30
   9  -4  -2   38.80    6.50
  -4  -9  -2   20.50    7.60
  -9   4   2   24.70    7.70
   9  -4   2   22.70    6.70
   9  -4   2   22.70    3.70
  -9   5  -2  468.15   32.30
   9  -5  -2  424.56   32.00
  -5  -9  -2  419.66   33.70
   9  -5  -2  413.26   34.10
   5   9  -2  384.66   29.20
  -5  -9  -2  466.95   33.70
  -9   5   2  473.45   34.40
   9  -5   2  419.26   32.50
   9  -5   2  474.05   29.70
  -5  -9   2  487.05   34.90
  -6  -9  -2   64.69   11.40
  -9   6  -2   43.70    8.10
   9  -6  -2   69.59    9.20
   9  -6  -2   52.59    9.50
  -9   6   2   65.59   11.60
   9  -6   2   52.89    6.00
   9  -6   2   57.69    9.40
   9  -7  -2  120.29   12.20
   7   9  -2   65.39    7.90
   9  -7  -2   89.69   13.60
  -9   7  -2   60.69   11.80
  -7  -9  -2  102.99   14.30
   9  -7   2   96.49   12.00
   7   9   2   89.19   10.00
  -9   7   2   89.79   16.10
  -7  -9   2  101.49   14.90
   9  -7   2   80.89    7.80
   9  -8  -2  266.27   23.70
  -8  -9  -2  298.67   25.80
   8   9  -2  266.57   20.80
   9  -8  -2  244.08   26.50
  -8  -9   2  342.47   28.40
   9  -8   2  284.37   20.80
   8   9   2  349.57   22.70
  -9   8   2  360.26   28.50
   8   9   2  289.17   25.00
   9  -8   2  289.07   24.60
   9  -9  -2    1.10    5.20
   9   9  -2   -0.30    3.20
  -9  -9   2   -2.80    7.40
   9   9   2   -2.10    3.80
  -9   9   2    4.50    8.00
   9  -9   2   -1.80    2.80
  10   9  -2    5.90    3.60
   9 -10  -2    3.80    6.40
  10   9   2    9.20    4.50
  -9  10   2   -0.40    7.70
   9 -10   2    4.20    3.40
 -10  -9   2    3.00    7.60
  10   8  -2  156.18   13.20
   8 -10  -2  154.68   16.80
  -8  10   2  159.08   20.00
   8 -10   2  180.38   12.90
  10   8   2  154.48   14.00
 -10  -8   2  141.49   18.90
  10   7  -2   -4.50    3.40
   7 -10  -2    7.00    6.50
 -10  -7   2   -1.50    6.70
  10   7   2    3.50    5.00
  -7  10   2   28.20    8.60
   7 -10   2   -6.70    5.60
   7 -10   2    1.50    3.10
  10   7   2    5.30    4.10
   6 -10  -2   48.10    9.30
  10   6  -2   41.00    6.60
  -6  10  -2   66.79   11.20
 -10  -6  -2   45.00    9.00
  -6  10   2   52.29   11.30
  10   6   2   50.89    6.80
   6 -10   2   42.30    6.20
 -10  -6   2   61.99   11.80
  10   6   2   44.90    9.10
   6 -10   2   47.90    9.30
 -10  -5  -2   25.50    6.90
  10   5  -2   25.10    5.10
  10   5  -2   23.70    8.20
   5 -10  -2   21.60    7.20
   5 -10  -2   17.30    6.00
  10   5   2   22.00    6.70
  -5  10   2   13.10    8.40
  10   5   2   16.80    4.70
 -10  -5   2   31.70    9.60
   5 -10   2   20.50    7.10
  10   4  -2  160.08   13.90
   4 -10  -2  165.78   17.10
   4 -10  -2  142.29   15.80
 -10  -4  -2  159.48   15.80
  10   4  -2  162.08   17.60
  10   4   2  172.08   13.90
  10   4   2  169.48   16.60
   4 -10   2  181.68   17.20
  -4  10   2  216.28   20.60
 -10  -4   2  183.48   21.00
 -10  -3  -2   36.30    7.60
  10   3  -2   35.40    5.70
  10   3  -2   27.00    7.90
  10   3   2   34.80    5.60
 -10  -3   2   31.90    9.20
  10   3   2   37.80    7.60
   3 -10   2   38.50    8.70
   2 -10  -2  435.76   34.20
  10   2  -2  563.94   36.80
   2 -10  -2  480.85   34.70
 -10  -2  -2  433.96   34.40
  10   2  -2  477.05   32.70
  10   2   2  459.25   34.90
   2 -10   2  487.15   35.10
  10   2   2  449.66   32.30
 -10  -1  -2    8.70    5.30
  10   1  -2   14.20    6.80
  10   1  -2   11.60    4.20
   1 -10   2   12.50    6.50
  10   1   2   16.20    4.00
 -10  -1   2   23.80   10.30
  -1  10   2    1.30    6.20
  10   1   2   15.40    5.90
  10   0  -2   46.70    7.10
  10   0  -2   70.89   11.70
 -10   0  -2   61.79    8.50
 -10   0   2   70.59   12.40
  10   0   2   50.89    7.00
  10   0   2   59.69    9.10
   0 -10   2   51.99    9.40
  10  -1  -2  106.29   14.80
 -10   1  -2   85.99   11.80
  10  -1  -2   73.79    9.50
  10  -1   2   82.79    8.40
  10  -1   2   85.89   12.20
  -2 -10  -2  127.09   16.30
  10  -2  -2  141.59   17.40
  -2 -10  -2  190.28   19.00
 -10   2  -2  139.69   14.90
  10  -2  -2  121.39   12.90
  -2 -10   2  161.18   17.00
  10  -2   2  146.39   11.70
 -10   2   2  129.09   17.90
  10  -2   2  153.18   15.70
  -3 -10  -2  503.25   38.80
  10  -3  -2  519.05   40.10
 -10   3  -2  524.85   37.00
  -3 -10  -2  550.64   40.50
  10  -3  -2  503.55   36.90
  -3 -10   2  513.55   41.00
 -10   3   2  533.65   39.70
  10  -3   2  539.45   38.40
  10  -3   2  528.75   35.20
  10  -4  -2   59.69    9.20
 -10   4  -2   67.09    9.50
  -4 -10  -2  108.99   17.60
  -4 -10  -2   66.19   11.50
  10  -4  -2   85.59   14.40
 -10   4   2   71.49   11.60
  10  -4   2   60.99    7.20
  -4 -10   2   88.79   13.20
  10  -4   2   70.79   11.00
  10  -5  -2   39.10   10.90
 -10   5  -2   27.90    7.70
  -5 -10  -2   28.40    9.10
  10  -5  -2   33.20    7.10
  -5 -10  -2   36.00    8.90
   5  10  -2   19.90    3.60
 -10   5   2   34.40    9.00
  -5 -10   2   34.20    9.70
  10  -5   2   35.00    4.50
  10  -5   2   31.80    7.80
  10  -6  -2   26.80    7.90
  10  -6  -2   40.40    7.90
   6  10  -2   23.80    3.90
 -10   6  -2   18.50    6.50
  -6 -10  -2   45.80    9.50
  10  -6   2   37.30    8.40
 -10   6   2   30.00    9.40
  10  -6   2   32.90    4.60
  10  -7  -2  196.08   19.20
   7  10  -2  198.68   15.40
  10  -7  -2  202.28   20.70
 -10   7   2  238.48   22.90
  10  -7   2  213.98   15.60
  10  -7   2  205.08   19.80
  -7 -10   2  231.48   24.00
  10  -8  -2   -1.50    5.60
   8  10  -2    2.50    3.10
 -10   8   2   -4.20    7.80
   8  10   2   -1.90    4.30
  10  -8   2   -3.00    3.00
  -8 -10   2    7.50    7.50
   9  10  -2  142.79   12.60
  10  -9  -2  167.68   16.30
   9  10   2  171.88   14.40
 -10   9   2  153.78   21.20
  -9 -10   2  164.08   21.30
  10  -9   2  157.68   12.80
  10 -10  -2    5.10    6.00
  10  10  -2    8.40    3.70
  10 -10   2    6.50    3.90
 -10  10   2   -0.60    8.00
  10  10   2   12.10    5.10
 -10 -10   2   20.30    9.40
  10 -11  -2    2.50    6.60
  11  10  -2    5.60    4.10
  11  10   2    8.40    4.90
  10 -11   2    7.20    4.00
 -11 -10   2    7.40    7.30
 -10  11   2    4.80    8.60
   9 -11  -2   -4.60    5.80
  11   9  -2    4.00    3.70
 -11  -9   2   11.10    7.10
  11   9   2    6.40    4.20
   9 -11   2   -2.80    3.20
  -9  11   2   -4.70    7.40
  11   8  -2    4.60    4.10
   8 -11  -2   -0.20    6.20
   8 -11   2    6.40    3.70
 -11  -8   2    2.50    6.70
  11   8   2    6.30    4.00
  -8  11   2    4.50    8.10
   7 -11  -2   59.79   10.70
  11   7  -2   74.29    9.00
  -7  11   2   79.69   13.20
  11   7   2   78.49    9.40
 -11  -7   2  104.39   15.00
   7 -11   2   71.19    7.90
  11   6  -2  290.07   22.00
   6 -11  -2  271.17   24.40
   6 -11   2  292.27   20.90
 -11  -6   2  299.87   28.50
  11   6   2  285.17   22.10
  -6  11   2  347.97   28.10
  11   5  -2  122.79   11.60
   5 -11  -2  106.59   14.30
  -5  11   2  150.28   19.30
  11   5   2  125.09   14.80
   5 -11   2   99.29   15.40
 -11  -5   2  115.99   19.50
  11   5   2  124.59   11.90
  11   4  -2  312.97   22.50
   4 -11  -2  257.07   24.30
 -11  -4  -2  320.17   25.20
 -11  -4   2  316.97   27.80
  -4  11   2  301.87   29.10
  11   4   2  295.37   22.10
  11   4   2  330.67   25.80
   4 -11   2  278.17   25.20
   3 -11  -2  160.18   16.30
  11   3  -2  151.58   13.50
 -11  -3  -2  169.68   17.00
  11   3  -2  148.89   16.70
  11   3   2  146.59   16.40
 -11  -3   2  144.19   19.70
   3 -11   2  161.48   18.40
  11   3   2  156.18   13.20
  11   2  -2   71.79   11.90
  11   2  -2   59.29    8.00
   2 -11  -2   59.99   10.30
   2 -11   2   78.99   14.00
 -11  -2   2   74.09   13.60
   0 -11  -2  400.56   32.20
  11   0  -2  434.26   34.30
  11   0  -2  381.66   29.60
 -11   0  -2  420.76   30.80
   0 -11   2  474.55   32.90
  11   0   2  404.76   31.80
  11   0   2  410.66   28.90
 -11   2  -2   39.10    7.80
  -2 -11  -2   34.60    9.10
  11  -2  -2   25.10    6.20
  11  -2  -2   31.10    8.60
 -11   2   2   38.50    9.10
  11  -2   2   47.70    8.90
  -2 -11   2   54.79   13.40
  11  -2   2   30.70    4.90
  -3 -11  -2  140.69   16.50
  -3 -11  -2  148.19   19.70
  -3 -11   2  121.79   20.00
  11  -4  -2   88.19   15.30
 -11   4  -2   88.89   12.20
  -4 -11  -2  103.79   18.70
  -4 -11  -2  114.79   15.00
  11  -4  -2   84.89   12.20
  -4 -11   2   82.89   15.10
 -11   4   2   98.79   15.70
  11  -4   2  114.09    9.20
  11  -4   2   86.99   13.80
  11  -5  -2  323.77   30.50
  -5 -11  -2  327.27   29.90
  -5 -11  -2  407.76   28.80
  11  -5  -2  333.97   25.80
 -11   5   2  314.27   28.20
  11  -5   2  304.07   27.60
  11  -5   2  357.06   23.40
  -5 -11   2  330.17   29.80
  11  -6  -2   83.59   17.50
  11  -6  -2  131.69   13.60
 -11   6   2  105.89   14.20
  11  -6   2   93.79   16.00
  11  -6   2  100.39    9.20
   6  11   2   82.59   11.20
  11  -7  -2  232.18   20.60
   7  11   2  225.58   19.00
  11  -7   2  229.18   17.40
 -11   7   2  271.97   24.30
   8  11  -2    3.90    3.00
  11  -8  -2   35.40    7.60
  11  -8   2    4.10    3.50
   8  11   2   17.10    5.20
  -8 -11   2   12.70    9.10
 -11   8   2    4.20    7.90
  11  -9  -2   24.70    8.00
   9  11  -2   29.30    4.90
  -9 -11   2   46.20   11.30
   9  11   2   33.60    6.70
 -11   9   2   29.50   10.50
  11  -9   2   28.20    5.20
  10  11  -2    3.10    3.60
  11 -10  -2    0.80    6.40
 -11  10   2   -1.30    7.80
  11 -10   2    6.40    3.90
 -10 -11   2    6.40    8.10
  10  11   2   14.00    5.50
  11 -11  -2  137.39   16.50
  11  11  -2  151.68   12.80
  11  11   2  143.49   13.80
 -11 -11   2  172.38   21.80
  11 -11   2  121.69   13.20
  11 -12  -2   46.00    9.70
  12  11  -2   26.50    5.70
 -12 -11   2   31.10   10.70
  12  11   2   21.90    6.50
  11 -12   2   22.30    6.00
  10 -12  -2   28.50    9.00
  12  10  -2   29.50    5.80
  10 -12   2   23.90    5.80
 -12 -10   2   35.60    9.80
  12   9  -2  152.88   13.20
   9 -12  -2  130.39   16.50
 -12  -9   2  131.69   18.60
  12   9   2  154.38   13.60
  -9  12   2  133.59   20.30
  12   8  -2   -0.20    4.00
   8 -12  -2    4.50    6.50
  -8  12   2   13.50    8.50
   8 -12   2    3.10    4.50
  12   8   2    0.00    4.10
 -12  -8   2    4.00    7.50
  12   7  -2   17.60    5.00
   7 -12  -2    9.80    7.10
  12   7   2   17.20    5.00
 -12  -7   2   18.40    8.70
  -7  12   2   18.40    9.40
   6 -12  -2    9.20    7.30
  12   6  -2   25.10    5.50
 -12  -6   2   24.10    9.70
  -6  12   2   35.20   10.70
  12   6   2   12.00    4.60
   5 -12  -2   33.00    8.70
  12   5  -2   49.80    7.10
 -12  -5   2   55.39   11.60
  12   5   2   40.80    6.80
  -5  12   2   24.60   10.70
  12   4  -2   -0.70    4.20
   4 -12  -2   -6.00    5.60
  12   4   2   -5.90    3.60
 -12  -4   2   -3.00    8.10
  -4  12   2   -3.40    8.60
  12   3  -2   75.99   10.20
   3 -12  -2   92.79   11.90
  12   3   2   70.79    9.00
   3 -12   2   96.39   16.20
  12   3   2   71.99   12.80
  12   2  -2   15.00    6.10
   2 -12   2   30.70    8.60
  12   2   2   27.40    5.20
 -12  -2   2   19.40   12.20
  12   2   2   32.30    7.90
  12   1  -2  151.68   22.70
  12   1  -2  165.58   15.10
   1 -12  -2  176.38   18.30
   1 -12   2  185.08   19.90
  12   1   2  200.98   18.40
 -12  -1   2  145.79   23.40
  12   1   2  180.18   14.20
   1 -12   2  167.98   19.10
  12   0  -2   59.79   13.00
  12   0  -2   59.89    8.40
   0 -12  -2   83.79   11.70
  12   0   2   69.49   12.50
  12   0   2   71.29    8.00
 -12   0   2   62.09   13.80
   0 -12   2   56.49   11.00
  12  -1  -2   66.19    9.30
  12  -1  -2   70.99   12.00
  -1 -12  -2   70.39   12.00
  12  -1   2   71.59   12.40
 -12   1   2   74.69   13.40
  12  -1   2   71.49    8.00
  12  -2  -2  347.57   30.20
  12  -2  -2  342.07   26.10
  -2 -12  -2  328.87   28.20
  12  -2   2  362.46   24.60
 -12   2   2  339.47   29.70
  12  -2   2  361.66   28.70
  -3 -12  -2  -17.00    8.50
  12  -3  -2    1.60    7.70
  12  -3  -2    5.00    5.30
  -3 -12  -2    7.60    8.90
 -12   3   2   11.40    8.40
  12  -3   2    2.90    6.40
  -3 -12   2    3.70    7.40
  12  -3   2    2.00    3.30
  -3 -12   2   20.50   10.40
  -4 -12  -2   58.89   12.00
  12  -4  -2   74.29   10.80
  12  -4  -2   74.19   22.90
  -4 -12   2  101.49   15.40
  12  -4   2   69.09    7.90
 -12   4   2   64.99   11.60
  12  -5  -2   -7.70    5.20
  -5 -12  -2    5.90    8.50
  12  -5   2    0.10    3.00
 -12   5   2   -8.50    5.70
  -5 -12   2    2.10    6.70
  12  -6  -2  114.49   14.00
  -6 -12   2  108.19   17.60
 -12   6   2  134.79   17.70
   6  12   2  143.49   12.70
  12  -6   2  109.89   10.70
  12  -7  -2   50.49    9.50
   7  12   2   62.39    8.80
  -7 -12   2   81.79   15.30
 -12   7   2   46.50   11.00
  12  -7   2   65.59    7.80
  12  -8  -2  207.68   18.40
 -12   8   2  165.28   21.30
  -8 -12   2  200.28   23.90
   8  12   2  175.48   15.70
  12  -8   2  166.88   14.40
  12  -9  -2   68.49   11.30
  12  -9   2   63.99    9.00
  -9 -12   2   73.29   14.20
 -12   9   2   99.39   18.10
   9  12   2   89.89   10.30
  12 -10  -2    8.60    7.30
 -10 -12   2    1.40    9.00
  10  12   2   11.40    5.30
  12 -10   2    7.10    4.20
  12 -11  -2    0.10    7.10
  12 -11   2   -3.90    4.40
  11  12   2   12.40    5.60
 -11 -12   2    2.40    9.00
  12 -12  -2   -2.90    7.60
  12  12   2   -3.10    4.40
  12 -12   2   -2.40    4.50
  12 -13  -2   42.40   11.10
  13  12   2   62.69    9.40
  11 -13  -2    9.60    8.30
  13  11  -2    7.90    5.10
  13  11   2    7.90    5.60
  10 -13  -2   -3.80    6.90
  13  10  -2    4.10    4.50
  13  10   2    4.90    4.90
  13   9  -2   13.30    5.00
   9 -13  -2   -3.10    7.50
  13   9   2   -0.90    4.50
 -13  -9   2   25.30    8.80
  13   8  -2   -0.40    4.40
   8 -13  -2   -5.00    6.70
  -8  13   2   -3.70   10.30
  13   8   2    6.70    4.70
 -13  -8   2    6.20    8.10
  13   7  -2  216.18   17.30
   7 -13  -2  200.08   20.30
  13   7   2  205.98   17.30
  -7  13   2  199.48   25.30
 -13  -7   2  222.28   24.80
  13   6  -2   18.90    5.10
   6 -13  -2    1.90    7.00
 -13  -6   2   12.80    9.10
  13   6   2    4.30    4.40
  -6  13   2    7.80   10.10
  13   5  -2  174.58   14.70
   5 -13  -2  147.79   16.90
  -5  13   2  158.98   22.50
  13   5   2  157.98   14.20
 -13  -5   2  174.28   21.00
   4 -13  -2   11.10    6.80
  13   4  -2    3.20    4.40
  13   4   2    0.60    3.60
  -4  13   2    0.70    8.90
 -13  -4   2    1.90    7.60
  13   3  -2   -7.70    4.20
   3 -13  -2   -3.70    5.80
 -13  -3   2   -8.30    8.60
  13   3   2   -3.60    3.40
  -3  13   2   12.50    8.40
  13   2  -2   -2.80    4.10
   2 -13  -2    4.70    6.40
 -13  -2   2   -6.50    9.80
  -2  13   2    7.20    7.10
  13   2   2   -0.30    3.50
   1 -13  -2  172.08   17.90
  13   1  -2  145.69   14.80
 -13  -1   2  201.68   23.30
  13   1   2  157.88   13.60
   1 -13   2  157.78   18.90
   0 -13  -2  109.09   15.00
  13   0  -2   82.89   10.80
   0 -13   2   98.39   14.80
 -13   0   2  105.49   18.40
  13   0   2  105.49    9.90
  -1 -13  -2  126.39   16.20
  13  -1  -2  121.39   12.90
  13  -1   2  129.19   11.50
 -13   1   2  125.79   19.00
  -1 -13   2  151.68   19.40
  -2 -13  -2   35.40    9.10
  13  -2  -2    5.60    4.70
 -13   2   2    0.60    6.80
  -2 -13   2   19.10   11.20
  13  -2   2    7.10    3.60
  -3 -13  -2   20.40    8.90
  13  -3  -2   19.20    5.90
  13  -3   2   27.70    4.90
 -13   3   2   19.90    9.40
  -3 -13   2   47.80   13.10
  13  -4  -2  204.48   18.40
  -4 -13  -2  217.98   20.40
 -13   4   2  170.48   20.50
  13  -4   2  201.98   15.40
  -4 -13   2  194.98   24.10
  13  -5  -2   44.30    8.90
  -5 -13  -2   55.19   12.00
  -5 -13   2   64.69   13.00
 -13   5   2   39.80    9.80
  13  -5   2   59.99    7.70
  13  -6  -2  258.27   22.70
  -6 -13   2  308.17   27.60
 -13   6   2  240.28   25.30
  13  -6   2  288.17   20.30
   6  13   2  275.07   21.60
  13  -7  -2    5.00    6.10
  -7 -13   2    5.70    9.70
  13  -7   2    2.90    3.60
   7  13   2    8.10    5.30
 -13   7   2   -1.10    7.80
  13  -8  -2   -4.10    6.20
  -8 -13   2    8.00    8.80
   8  13   2    2.70    5.00
  13  -8   2   -3.10    3.60
  13  -9  -2   29.50    9.20
   9  13   2   46.90    7.50
  13  -9   2   36.60    6.10
  -9 -13   2   36.00   13.30
  13 -10  -2  104.69   14.60
  10  13   2  119.99   13.00
  13 -10   2  109.49   11.80
 -10 -13   2  114.69   20.90
  13 -11  -2   19.10    8.70
  11  13   2   21.80    6.60
  13 -11   2   24.60    6.40
  13 -12  -2    3.90    7.80
  12  13   2    4.80    5.10
  13 -12   2   12.40    5.80
  13 -13  -2    0.50    8.00
  13  13   2    7.00    5.70
  13 -14  -2   28.20   10.70
  14  13   2   17.50    6.80
  12 -14  -2  -10.00    8.20
  14  12   2    2.90    5.50
  11 -14  -2    1.80    7.70
  14  11  -2    3.40    5.10
  14  11   2    5.80    5.70
  14  10  -2   59.19    8.50
  10 -14  -2   47.10   11.10
  14  10   2   65.59    9.60
   9 -14  -2   -7.30    6.90
  14   9  -2   -0.70    4.40
  14   9   2    5.00    5.20
   8 -14  -2   21.00    8.90
  14   8  -2   30.00    6.10
  14   8   2   20.00    5.90
  14   7  -2    2.00    4.50
   7 -14  -2    1.00    6.90
 -14  -7   2    0.10    9.30
  14   7   2    1.00    4.20
   6 -14  -2   17.20    7.90
  14   6  -2   29.60    6.10
  -6  14   2    3.90   11.00
  14   6   2   21.20    5.30
 -14  -6   2   16.30    9.20
  14   5  -2   58.09    8.50
   5 -14  -2   57.59   10.00
  14   5   2   46.10    7.50
 -14  -5   2   64.49   14.30
   4 -14  -2   83.39   12.20
  14   4  -2   79.89   10.90
  14   4   2   86.49   10.20
 -14  -4   2  118.99   18.30
   3 -14  -2  102.09   15.20
  14   3  -2  126.99   13.00
  14   3   2  126.09   11.80
 -14  -3   2  137.79   20.60
   2 -14  -2   31.80    9.00
  14   2  -2   27.00    6.50
 -14  -2   2   19.10   12.70
  14   2   2   40.40    6.10
   1 -14  -2    0.20    6.80
  14   1  -2    5.00    4.90
   1 -14   2    0.50    6.40
 -14  -1   2  -11.30    9.20
  14   1   2    9.30    3.90
  -1  14   2    5.90    7.30
   0 -14  -2   10.60    7.20
  -1 -14  -2   95.79   13.50
  14  -1  -2   74.09   11.00
  -1 -14   2  108.89   18.40
 -14   1   2  104.19   16.00
  14  -1   2   96.29    9.60
  -2 -14  -2    9.00    8.30
  14  -2  -2    8.20    5.30
  -2 -14   2    1.30   11.20
 -14   2   2   -2.10    6.90
  14  -2   2    3.70    3.60
  -3 -14  -2  138.39   17.70
  14  -3  -2  171.88   15.50
  14  -3   2  128.69   12.60
 -14   3   2  161.48   20.00
  -4 -14  -2   44.00   10.60
  14  -4  -2   -6.00    5.80
 -14   4   2   -3.00    7.00
  -4 -14   2   12.60    9.70
  14  -4   2   -0.40    3.70
  14  -5  -2   12.50    6.70
  -5 -14  -2    6.50    8.70
 -14   5   2    4.60    8.70
  -5 -14   2    8.40    7.90
  14  -5   2   -5.10    3.70
  14  -6  -2   39.20    9.40
  14  -6   2   42.80    6.70
   6  14   2   60.49    8.70
  -6 -14   2   52.49   12.80
  14  -7  -2   44.80   10.10
  14  -7   2   43.10    7.00
  -7 -14   2   58.39   15.30
   7  14   2   49.20    8.80
  14  -8  -2   40.60    9.80
  -8 -14   2   57.09   13.60
  14  -8   2   43.90    7.10
   8  14   2   39.20    8.40
  14  -9  -2    0.30    7.00
  14  -9   2    7.80    4.40
   9  14   2    3.80    5.20
  -9 -14   2   17.00   11.20
  14 -10  -2    8.50    8.00
  14 -10   2   12.10    5.20
  10  14   2    9.40    6.10
  14 -11  -2   26.50    9.40
  11  14   2   28.80    7.50
  14 -11   2   21.80    6.70
  14 -12  -2   59.69   12.30
  12  14   2   71.59   10.10
  14 -12   2   69.89   11.00
  14 -13  -2   40.90   11.50
  13  14   2   62.69    9.70
  14 -14  -2    7.10    9.50
  14  14   2   25.50    7.60
  14 -15  -2    3.40    9.40
  15  14   2   -5.60    5.60
  13 -15  -2   16.20   10.20
  15  13   2   25.30    7.30
  12 -15  -2   13.10    9.70
  15  12   2   25.30    7.00
  15  11  -2   31.90    7.40
  11 -15  -2   29.50   10.40
  15  11   2   28.50    7.10
  10 -15  -2    7.50    8.70
  15  10  -2    6.40    5.30
  15  10   2    4.50    5.00
  15   9  -2   11.00    5.80
   9 -15  -2    2.00    8.00
  15   9   2    5.90    5.40
  15   8  -2  108.09   12.30
   8 -15  -2   94.49   14.40
  15   8   2  106.79   12.00
   7 -15  -2   12.10    8.50
  15   7  -2   24.00    6.50
  15   7   2   37.70    6.60
  15   6  -2   69.59    9.40
   6 -15  -2   68.19   11.80
  15   6   2   74.49    9.90
  15   5  -2    9.30    5.20
  15   5   2   -1.90    4.10
  15   4  -2   -1.40    4.70
   4 -15  -2   -4.90    6.50
  -4  15   2    0.90    9.20
  15   4   2    6.40    4.10
   2 -15  -2   54.99   11.30
  15   2  -2   67.69    9.60
  15   2   2   60.79    8.50
 -15  -2   2   56.99   15.30
   2 -15   2   53.59   12.70
  15   1  -2   43.70    8.00
   1 -15  -2   38.40   10.10
  15   1   2   37.90    6.40
 -15  -1   2   47.20   14.20
   1 -15   2   44.60   10.90
   0 -15  -2   -3.40    7.40
  15   0  -2    3.50    5.00
   0 -15   2   -0.20    6.30
 -15   0   2    5.30   10.10
  15   0   2    2.80    3.80
  15  -1  -2   45.60    8.20
 -15   1   2   48.80   16.40
  -1 -15   2   51.29   14.60
  15  -1   2   33.40    6.10
  -2 -15  -2   -2.10    7.80
  15  -2  -2    3.80    5.70
  -2 -15   2   45.50   16.00
  15  -2   2    4.80    4.10
  15  -3  -2   83.69   11.90
  -3 -15  -2  102.79   14.70
  -3 -15   2  132.59   22.00
  15  -3   2   96.29   10.40
  15  -4  -2   34.70    9.00
  -4 -15  -2   34.80   10.50
  15  -4   2   28.20    5.70
  -4 -15   2   27.60   12.70
  15  -5  -2  413.36   32.40
  15  -5   2  416.66   29.80
  -5 -15   2  420.56   37.50
  15  -6  -2   27.80    8.30
  -6 -15   2   23.90    9.80
   6  15   2   38.40    7.70
  15  -6   2   27.30    6.10
  15  -7  -2   22.90    8.40
  -7 -15   2   27.30   11.90
   7  15   2   27.20    8.00
  15  -7   2   22.10    5.90
  15  -8  -2    7.30    7.50
  15  -8   2    7.90    5.10
   8  15   2    9.30    5.70
  -8 -15   2    5.90   10.60
  15  -9  -2   84.89   14.00
   9  15   2   86.99   11.50
  15  -9   2  112.79   11.90
  15 -10  -2   38.40   10.90
  10  15   2   33.50    8.50
  15 -10   2   49.99    8.20
  15 -11  -2   18.10    9.50
  11  15   2   13.00    6.80
  15 -11   2   14.90    6.50
  15 -12  -2    5.10    8.80
  12  15   2    6.60    6.20
  15 -12   2    9.40    9.30
  15 -13  -2    4.30    9.10
  13  15   2   -3.00    5.70
  15 -14  -2   12.40    9.90
  14  15   2   12.00    6.60
  15 -15  -2    3.20    9.50
  15  15   2   -2.70    5.90
  15 -16  -2   19.80   11.80
  16  15   2   26.90    7.50
  14 -16  -2   -5.80    9.10
  16  14   2   -0.30    5.60
  13 -16  -2   11.90   10.30
  16  13   2    3.40    5.60
  12 -16  -2   -1.00    8.80
  16  12   2    1.90    5.20
  16  11  -2   25.00    7.20
  11 -16  -2   23.20   10.90
  16  11   2   33.10    7.30
  10 -16  -2    8.20    8.70
  16  10  -2    2.30    5.30
  16  10   2   11.20    5.40
  16   9  -2   30.50    7.40
   9 -16  -2   36.10   11.00
  16   9   2   34.50    7.20
  16   8  -2   12.10    5.90
   8 -16  -2   -2.20    8.00
  16   8   2   12.90    5.60
  16   7  -2   -0.80    5.40
   7 -16  -2   -1.10    7.60
  16   7   2   22.10    5.80
   6 -16  -2    7.60    7.20
  16   6  -2   -0.50    5.00
  16   6   2    2.60    4.40
   5 -16  -2   10.90    7.80
  16   5  -2   11.00    6.10
  16   5   2    9.30    4.80
  16   4  -2   18.60    6.70
   4 -16  -2    7.50    8.20
  16   4   2   14.10    5.10
  16   3  -2   -4.60    4.90
   3 -16  -2    0.80    7.40
  16   3   2    1.90    4.50
  16   2  -2    1.20    5.30
   2 -16  -2   -4.10    7.40
   2 -16   2   -0.20    6.90
  -2  16   2   -6.40    8.00
  16   2   2    4.20    4.30
  16   1  -2   27.70    7.20
   1 -16  -2   36.30    9.90
  16   1   2   29.70    6.10
   1 -16   2   18.30    8.50
  -1  16   2    6.60   10.30
   0 -16  -2   86.99   13.70
  16   0  -2   68.39   10.50
  16   0   2   74.59    9.70
   0 -16   2   78.99   16.40
  -1 -16  -2   75.19   13.40
  16  -1  -2   81.09   11.20
  16  -1   2   69.59    9.80
  -1 -16   2   86.59   17.90
  16  -2  -2   74.39   11.30
  -2 -16  -2   68.69   13.20
  -2 -16   2  124.99   25.00
  16  -2   2   74.29    9.80
  16  -3  -2   48.40    9.40
  -3 -16  -2   32.50   11.00
  16  -3   2   32.40    6.50
  -3 -16   2   53.79   15.90
  16  -4  -2   -0.50    6.90
  -4 -16  -2    0.90    9.00
  16  -4   2    9.90    4.60
  -4 -16   2   -6.40   10.30
  16  -5  -2    1.10    7.40
  -5 -16   2    4.90    8.50
  16  -5   2    3.00    4.60
   5  16   2    6.60    5.70
  16  -6  -2   12.20    8.10
  16  -6   2   13.20    5.70
   6  16   2   21.00    6.80
  -6 -16   2   15.00    9.40
  16  -7  -2   93.89   14.00
   7  16   2   99.79   12.80
  -7 -16   2  132.59   23.70
  16  -7   2   92.49   11.60
  16  -8  -2   22.30    9.20
   8  16   2   28.80    7.30
  16  -8   2   19.40    6.50
  16  -9  -2   33.70   10.70
   9  16   2   43.80    8.40
  16  -9   2   51.59    8.60
  16 -10  -2   31.00   10.50
  16 -10   2   23.90    7.40
  10  16   2   42.90    8.70
  16 -11  -2   -9.40    8.30
  16 -11   2    5.90    6.50
  11  16   2   12.70    6.60
  16 -12  -2    7.60    9.70
  12  16   2   10.70    6.90
  16 -13  -2    6.80   10.00
  13  16   2   10.30    6.70
  16 -14  -2   -4.90    9.30
  14  16   2   -8.00    6.00
  16 -15  -2   -0.60    9.90
  15  16   2   -5.50    5.60
  14 -17  -2   50.19   13.40
  17  14   2    7.10    6.30
  13 -17  -2   28.40   12.40
  17  13   2   38.50    8.20
  12 -17  -2    3.10    9.70
  17  12   2    5.80    5.90
  11 -17  -2   10.80    9.60
  17  11  -2   14.00    6.80
  17  11   2    9.80    5.90
  10 -17  -2    4.70    9.10
  17  10  -2   10.20    6.50
  17  10   2   -0.10    4.80
   9 -17  -2   30.80   10.80
  17   9  -2   20.40    7.40
  17   9   2   27.50    7.10
   8 -17  -2   22.80    9.40
  17   8  -2   20.40    7.10
  17   8   2   21.40    6.50
  17   7  -2  160.08   16.90
   7 -17  -2  173.28   19.80
  17   7   2  163.28   15.70
   6 -17  -2  -10.30    7.60
  17   6  -2   -3.40    5.30
  17   6   2    3.40    5.10
  17   5  -2    6.70    6.10
   5 -17  -2    1.10    8.10
  17   5   2    5.00    5.00
   4 -17  -2   -3.40    7.60
  17   4  -2    4.50    6.00
  17   4   2    2.90    4.60
   3 -17  -2   69.79   13.10
  17   3  -2   49.20    9.50
  17   3   2   63.69    8.60
   3 -17   2   54.59   13.30
  17   2  -2   19.00    7.30
   2 -17  -2   12.00    9.30
   2 -17   2   19.20    9.70
  17   2   2   19.70    5.90
  17   1  -2    1.60    6.00
   1 -17  -2   -3.80    8.50
  17   1   2    4.70    4.60
   1 -17   2    6.40    7.20
  17   0  -2   27.20    7.90
   0 -17  -2   18.40   10.90
  17   0   2   32.50    6.70
   0 -17   2   21.70   13.10
  17  -1  -2    4.00    6.40
  -1 -17  -2   41.60   10.80
  -1 -17   2    9.50   12.30
  17  -1   2    4.40    4.60
  17  -2  -2   14.30    8.10
  -2 -17  -2   20.00   10.50
  -2 -17   2   51.89   18.30
  17  -2   2   14.60    5.70
  -3 -17  -2   -1.40    9.70
  17  -3  -2    3.70    6.90
  17  -3   2   13.90    5.50
  -3 -17   2    7.00   15.10
  -4 -17  -2   98.89   16.10
  17  -4  -2   95.59   14.20
  -4 -17   2  102.99   20.80
  17  -4   2  100.69   11.80
  17  -5  -2   34.20   10.00
   5  17   2   32.70    7.80
  17  -5   2   28.70    6.80
  -5 -17   2   22.10   10.90
  17  -6  -2    2.10    7.60
  17  -6   2   10.90    5.90
   6  17   2    3.30    6.30
  -6 -17   2    3.50   10.60
  17  -7  -2   23.60    9.20
   7  17   2   28.50    7.60
  17  -8  -2   17.30    8.50
  17  -8   2    2.70    5.50
   8  17   2    7.40    6.00
  17  -9  -2   87.69   15.00
   9  17   2   94.99   12.60
  17  -9   2   93.29   13.20
  17 -10  -2    2.70    8.30
  17 -10   2   -0.90    5.90
  10  17   2    3.50    6.30
  17 -11  -2    6.30    9.40
  11  17   2    6.00    6.50
  17 -11   2   18.50    7.70
  17 -12  -2   -1.30    9.30
  12  17   2    0.60    7.00
  17 -13  -2    2.30    9.60
  13  17   2   14.20   10.20
  17 -14  -2   -5.40    9.10
  18  13   2   -0.30    5.70
  18  12   2   -1.30    5.70
  18  11  -2   36.20    8.90
  18  11   2   37.10    8.20
  18  10  -2   24.90    7.60
  18  10   2   19.70    6.80
  18   9  -2   23.10    7.70
  18   9   2   18.10    6.70
  18   8  -2   13.80    6.80
  18   8   2   -0.70    5.40
  18   7  -2    3.60    6.20
  18   7   2    5.70    5.60
  18   6  -2   14.50    7.00
  18   6   2   11.40    6.30
  18   5  -2  106.49   14.10
  18   5   2   96.89   12.60
  18   4  -2   19.20    7.40
   4 -18  -2   11.80   13.90
  18   4   2   16.10    6.30
   3 -18  -2   35.40   15.20
  18   3  -2   27.40    8.20
  18   3   2   27.50    6.90
  18   2  -2   -7.50    5.90
  18   2   2   -2.40    4.70
   1 -18  -2    8.20   14.00
  18   1  -2   12.30    7.80
  18   1   2   20.10    6.00
  18   0  -2   -0.90    6.50
   0 -18  -2   -3.40   12.20
   0 -18   2   -9.00   12.10
  18   0   2    0.60    4.70
  18  -1  -2    5.20    7.20
  -1 -18  -2    9.50   13.40
  18  -1   2   16.50    5.80
  -1 -18   2    1.20   13.10
  -2 -18  -2   38.00   16.40
  18  -2  -2   17.00    8.10
  18  -2   2   28.90    6.90
  -2 -18   2   51.59   19.10
  -3 -18  -2    6.30   16.90
  18  -3  -2    1.20    7.60
  18  -3   2    4.50    5.30
  -3 -18   2   13.60   13.90
  18  -4  -2   -8.70    7.70
  18  -4   2   -0.50    5.40
  -4 -18   2   13.20   13.60
  18  -5  -2    6.40    7.70
  18  -6  -2   42.10   11.30
  18  -6   2   41.60    8.70
  18  -7  -2   10.70    8.60
  18  -7   2   14.00    6.60
  18  -8  -2    4.80    9.00
  18  -8   2   21.00    7.30
  18  -9  -2    0.90    8.90
  18  -9   2   -1.60    6.00
  18 -10  -2    5.70    9.30
  18 -10   2   -3.00    6.40
  18 -11  -2   36.90   12.20
  18 -11   2   47.50   10.20
  18 -12  -2   30.40   11.70
  18 -13  -2   14.50   11.30
  19  12   2    9.00    6.40
  19  11   2   -1.80    5.70
  19  10  -2    2.20    6.80
  19  10   2    3.10    6.10
  19   9  -2    0.50    6.70
  19   9   2    6.10    6.30
  19   8  -2   39.70    9.50
  19   8   2   37.30    8.30
  19   7  -2   24.90    8.30
  19   7   2   17.00    6.90
  19   6  -2    5.30    6.80
  19   6   2    6.10    6.10
  19   5  -2    2.70    6.70
  19   5   2    0.70    5.80
  19   4  -2    2.40    7.10
  19   4   2    2.10    5.50
  19   3  -2   57.79   11.50
  19   3   2   66.19    9.90
  19   2  -2   -1.30    6.80
  19   2   2   -5.70    5.00
  19   1  -2   42.90   10.50
  19   1   2   47.80    8.70
  19   0  -2   -1.30    7.10
  19   0   2   -2.10    4.90
  19  -1  -2   26.10    9.60
  19  -1   2   27.30    7.00
  19  -2  -2    2.20    8.00
  19  -2   2    7.60    6.00
  19  -3  -2   62.99   12.90
  19  -3   2   80.49   10.70
  19  -4  -2   39.70   11.20
  19  -4   2   49.80    9.00
  19  -5  -2   16.10    9.20
  19  -5   2    9.20    6.80
  19  -6  -2   -4.70    7.70
  19  -6   2   -0.90    6.30
  19  -7  -2   -4.20    7.90
  19  -7   2    1.40    6.30
  19  -8  -2    8.20    9.70
  19  -8   2   16.50    7.70
  19  -9  -2  -10.70    8.60
  19  -9   2   -2.10    6.60
  19 -10  -2   -1.50    9.30
  19 -10   2   12.00    7.40
  19 -11  -2    7.40   10.00
  19 -11   2    2.60    7.70
  19 -12  -2    6.00   10.40
  20  10  -2   26.90    9.10
  20  10   2   27.30    7.80
  20   9  -2    1.40    7.30
  20   9   2   -0.10    5.80
  20   8  -2   -4.50    7.60
  20   8   2    8.40    6.50
  20   7  -2   18.00    8.40
  20   7   2    9.60    6.60
  20   6  -2   23.10    9.00
  20   6   2   24.10    7.50
  20   5  -2   10.70    8.10
  20   5   2   14.50    6.90
  20   4  -2   21.70    8.90
  20   4   2   10.40    6.80
  20   3  -2    4.10    7.60
  20   3   2   -8.30    5.40
  20   2  -2    4.60    7.70
  20   2   2    7.40    6.10
  20   1  -2   63.89   12.30
  20   1   2   62.19   10.10
  20   0  -2   32.50   10.20
  20   0   2   36.80    8.30
  20  -1  -2   59.79   12.70
  20  -1   2   66.79   10.60
  20  -2  -2   14.60    9.10
  20  -2   2    2.70    6.20
  20  -3  -2   -8.60    7.80
  20  -3   2   -2.90    6.00
  20  -4  -2    3.90    8.70
  20  -4   2   -2.10    6.50
  20  -5  -2   15.60   10.10
  20  -5   2   18.60    8.00
  20  -6  -2   -4.50    8.70
  20  -6   2   -1.40    6.80
  20  -7  -2    6.60    9.70
  20  -7   2   17.50    7.80
  20  -8  -2  -13.60    8.50
  20  -8   2    2.30    6.90
  20  -9  -2  -13.10    8.70
  20  -9   2    5.20    7.30
  20 -10  -2   10.80   10.20
  20 -10   2   11.40    7.70
  21   8  -2   27.60    9.40
  21   8   2   20.50    7.70
  21   7  -2    4.40    8.00
  21   7   2    1.70    6.70
  21   6  -2   -5.80    7.60
  21   6   2    4.20    6.70
  21   5  -2    5.00    8.60
  21   5   2   -2.40    6.00
  21   4  -2   14.20    9.20
  21   4   2    9.40    7.00
  21   3  -2    6.40    8.80
  21   3   2   -3.60    6.10
  21   2  -2   19.50   10.10
  21   2   2   22.80    7.70
  21   1  -2   14.80    9.30
  21   1   2   12.50    7.40
  21   0  -2   -4.50    8.00
  21   0   2   -7.20    6.70
  21  -1  -2   10.10    9.70
  21  -1   2   10.70    7.60
  21  -2  -2   19.30   10.60
  21  -2   2   17.90    8.30
  21  -3  -2   39.10   11.90
  21  -3   2   42.70   10.10
  21  -4  -2    5.60    9.20
  21  -4   2   -4.00    6.90
  21  -5  -2    0.80    9.60
  21  -5   2  -14.00    6.30
  21  -6  -2   15.00   11.00
  21  -6   2    1.80    7.10
  21  -7  -2    3.70   10.20
  21  -7   2    9.50    7.90
  21  -8  -2   -6.00    9.50
  21  -8   2   13.20    8.10
  22   4  -2    9.80    9.40
  22   4   2    4.30    7.40
  22   3  -2    6.60    9.20
  22   3   2   10.20    7.30
  22   2  -2    5.30    9.60
  22   2   2    8.20    7.30
  22   1  -2    3.70    9.30
  22   1   2    4.50    7.30
  22   0  -2   31.30   11.90
  22   0   2   34.70    9.80
  22  -1  -2    8.50   10.10
  22  -1   2   14.10    8.40
  22  -2  -2    4.20    9.70
  22  -2   2   12.40    8.40
  22  -3  -2   -1.70    9.90
  22  -3   2    4.40    7.90
  22  -4  -2   18.80   11.40
  22  -4   2   13.50    8.40
   0   0  -3   -3.40    4.30
  -1   0  -3  476.45   35.00
   1   0  -3  523.25   34.70
  -1   2  -3  317.57   24.20
  -2  -1  -3  377.26   25.50
   2   1  -3  302.77   23.40
   1  -2  -3  323.87   24.50
   0   2  -3    0.30    4.40
  -2   0  -3    6.30    5.50
  -2   0   3    7.30    3.50
  -2   1  -3   90.39   11.60
  -2   1   3  106.39    9.10
  -2   2  -3 1051.39   66.39
  -2  -2  -3  987.00   66.99
   2  -2  -3  993.80   66.49
   2   2  -3  988.70   65.69
  -2   2   3  971.90   65.59
   2  -3  -3  400.76   28.60
   3   2  -3  372.46   27.10
   2  -3  -3  369.36   27.50
  -2   3  -3  448.66   28.10
  -3  -2  -3  424.66   29.40
  -2   3   3  377.86   28.00
  -3  -2   3  373.56   27.70
  -3  -1  -3  201.28   18.30
   3   0  -3  371.56   24.60
   3   0  -3  348.27   24.50
   0  -3  -3  324.27   25.70
  -3   0   3  323.27   24.40
  -1  -3  -3   11.70    6.00
  -3   1  -3    0.10    5.40
   3  -1  -3    4.90    4.20
   3  -1  -3    4.60    3.30
   1   3  -3   13.40    4.20
  -3   1   3   -2.80    3.60
  -3   2  -3   94.69   11.80
   3  -2  -3  112.29   11.20
  -3   2   3  116.89   12.40
   3  -3  -3   21.40    5.40
   3  -3  -3   16.10    4.90
  -3   3  -3    0.40    5.40
  -3  -3  -3   38.40    7.20
   3   3  -3   25.50    4.20
  -3   4   3  299.47   23.00
   2  -4  -3 1624.64  112.79
   4   2  -3 2014.10  113.99
  -2   4  -3 1971.30  112.99
   4   2  -3 1621.94  112.59
   2  -4  -3 1657.63  113.69
  -4  -2  -3 1632.94  113.99
  -2   4   3 1635.44  113.09
   4   1  -3   86.69    9.50
  -1   4  -3   68.09    9.80
   1  -4  -3   90.59   10.90
   1  -4  -3   77.99    9.00
  -1   4   3   65.99    9.60
   4   0  -3  209.48   15.70
   4   0  -3  155.58   14.60
   4  -1  -3   19.80    5.00
   4  -1  -3   31.50    5.30
  -1  -4  -3   33.60    8.20
  -4   1  -3   34.30    7.20
  -4   1   3   16.20    5.60
   4  -2  -3 1601.74  108.79
   2   4  -3 1693.43  107.79
  -2  -4  -3 1708.83  109.79
   4  -2  -3 1599.14  108.49
  -2  -4   3 1700.13  108.79
  -4   2   3 1678.93  108.59
   4  -3  -3   95.59    9.90
  -3  -4  -3   94.09   11.50
   3   4  -3   98.89    8.70
   4  -3  -3   71.99   10.20
   4  -3   3   72.49    7.60
  -4   3   3  104.59   11.70
   4  -4  -3  216.78   18.00
   4   4  -3  210.18   16.10
   4  -4  -3  208.98   17.40
   4   4  -3  196.68   17.30
  -4  -4  -3  219.38   18.60
   4  -4   3  225.38   15.00
  -4  -4   3  189.28   17.60
  -4   4   3  219.88   18.50
   4  -5  -3    0.90    3.40
   5   4  -3    1.30    3.20
  -5  -4  -3    4.70    5.80
   4  -5  -3   -3.40    5.00
   5   4  -3    4.60    3.80
   5   4   3    1.00    2.70
  -4   5   3   -2.10    5.60
   4  -5   3    4.90    2.20
   5   3  -3   10.50    4.00
   3  -5  -3    3.60    3.40
  -5  -3  -3    2.60    6.40
   3  -5  -3   10.50    5.80
  -5  -3   3    9.10    4.60
   3  -5   3    1.30    2.20
   5   2  -3   58.79    8.90
  -5  -2  -3   51.19    9.80
   2  -5  -3   52.79    8.70
   5   2  -3   65.59    8.20
   2  -5   3   57.09    5.60
  -5  -2   3   68.39    9.70
  -5  -1  -3   20.30    7.00
  -1   5  -3    9.80    4.50
   1  -5  -3   19.10    3.80
   1  -5  -3   22.20    6.10
   5   1  -3   13.70    4.50
   5   1  -3   11.60    4.40
  -5  -1   3    5.70    6.40
  -1   5   3    5.40    4.90
   0  -5  -3   79.39    8.50
   5   0  -3   62.09    9.00
   0   5  -3   77.49    8.60
   5   0  -3   49.20    7.90
  -5   0   3   97.89   11.90
  -1  -5  -3   -6.30    5.90
  -1  -5  -3    8.60    4.30
   5  -1   3   11.80    3.20
  -1  -5   3   -1.40    4.50
  -5   1   3    7.00    5.30
   2   5  -3   55.19    6.30
   5  -2  -3   55.19    8.00
  -2  -5  -3   53.49    9.20
  -2  -5  -3   60.49    7.10
   5  -2  -3   50.59    7.40
  -5   2   3   52.69    8.90
   5  -2   3   57.89    6.40
  -2  -5   3   48.80    7.80
  -3  -5  -3   11.70    5.20
   3   5  -3    9.20    3.10
   5  -3  -3    4.00    4.40
   5  -3  -3   -2.50    4.00
   3   5  -3   -2.60    3.40
  -5   3   3   -0.80    5.10
  -3  -5   3   -4.40    4.50
   5  -4  -3   93.99   11.50
   4   5  -3  139.49   12.10
  -4  -5  -3  110.69   13.30
   5  -4  -3  107.39   12.30
   5  -4   3  107.19    9.10
  -5   4   3  116.59   13.70
   5   5  -3    9.00    3.90
   5  -5  -3    6.70    5.00
  -5  -5  -3   11.30    6.70
   5  -5  -3    2.20    5.70
  -5   5   3   -1.40    6.50
   5  -5   3   15.40    3.00
  -6  -5  -3    4.40    7.50
   6   5  -3    3.90    3.70
   5  -6  -3    5.60    5.70
   6   5   3    6.40    4.00
   5  -6   3    3.60    2.10
  -6  -5   3    2.70    5.40
  -5   6   3    5.50    6.70
   6   4  -3  831.12   55.79
  -6  -4  -3  829.22   58.09
   4  -6  -3  855.41   57.49
   4  -6  -3  781.12   57.49
  -4   6   3  897.81   57.99
   4  -6   3  848.32   54.39
   6   4   3  838.12   56.79
   4  -6   3  859.71   55.99
  -6  -4   3  820.52   57.79
   6   3  -3  109.09   10.00
  -6  -3  -3  103.59   13.10
   3  -6  -3   91.79   11.60
   6   3  -3   82.89   11.00
   3  -6  -3   67.99   10.30
   3  -6   3   81.39   10.00
   3  -6   3   91.39    6.80
  -6  -3   3   85.79   12.70
  -3   6   3  111.19   13.20
   6   2  -3   26.00    6.00
   2  -6  -3   17.80    4.30
   2  -6  -3   20.90    6.70
   6   2  -3   22.80    5.30
   2  -6   3   15.90    2.90
  -2   6   3   10.70    5.60
   6   2   3   23.50    4.60
  -6  -2   3   16.80    5.90
   6   1  -3   67.19   10.00
   6   0  -3  251.27   19.20
   0  -6  -3  266.67   21.70
   6   0  -3  263.57   20.70
   0  -6  -3  234.48   18.80
   6   0   3  238.88   18.40
   0  -6   3  279.27   20.90
  -6   0   3  241.48   21.30
   6  -1  -3  109.19   11.30
  -1  -6  -3  118.09   10.90
  -1  -6  -3  129.49   12.60
   6  -1  -3  116.49   13.00
  -1  -6  -3  111.09   14.40
  -1  -6   3  108.29   12.30
  -6   1   3  120.09   14.30
   6  -1   3  121.89   10.20
  -2  -6  -3   -0.30    5.80
   2   6  -3   24.50    3.70
  -2  -6  -3    3.40    4.10
   6  -2   3    3.50    2.70
  -2  -6   3   13.20    5.10
  -3  -6  -3   -4.40    5.40
  -3  -6  -3    3.00    6.00
   6  -3  -3   -2.60    4.70
   6  -3  -3   -2.90    3.90
  -3  -6  -3    2.70    3.90
   3   6  -3    1.60    2.60
  -3  -6   3   -4.60    4.60
  -6   3   3   -6.00    5.60
   6  -3   3    1.00    2.40
   4   6  -3   29.60    5.50
   6  -4  -3   36.00    8.00
   6  -4  -3   33.30    6.80
  -4  -6  -3   25.70    8.00
  -4  -6  -3   41.40    7.30
  -6   4   3   40.90    8.00
  -5  -6  -3   15.70    4.70
  -5  -6  -3    4.00    7.60
   6  -5  -3    1.80    5.40
  -6   5   3    5.30    6.70
  -5  -6   3   26.20    7.10
  -6  -6  -3  488.25   36.10
   6  -6  -3  494.75   36.80
   6   6  -3  529.95   35.10
  -6  -6  -3  501.85   38.50
   6  -6   3  508.55   35.30
   6  -6   3  509.75   33.70
  -6  -6   3  544.15   38.80
   6  -7  -3    3.60    5.90
  -7  -6  -3    4.70    4.00
   7   6  -3    7.10    3.80
   7   6   3    1.10    4.00
  -6   7   3   -2.20    7.50
   6  -7   3   -1.10    4.50
   6  -7   3    2.60    2.00
   7   6   3    2.90    4.20
  -7  -6   3    8.80    6.30
   5  -7  -3    1.40    6.70
  -7  -5   3    9.20    6.40
   7   5   3    8.10    4.10
   7   4  -3  150.58   11.90
   4  -7  -3  134.79   15.00
   4  -7   3  111.39   12.00
   7   4   3  107.79   11.20
  -7  -4   3  131.19   15.20
   7   4   3  109.59   11.90
  -4   7   3  161.08   16.50
   4  -7   3  111.09    8.60
   3  -7  -3   30.70    7.80
   7   3   3   43.20    6.10
   7   3   3   44.90    7.00
  -3   7   3   34.00    8.80
   2  -7  -3  131.79   14.70
   7   2  -3  143.79   12.80
   7   2  -3  146.89   16.10
  -7  -2   3  153.18   16.10
  -2   7   3  126.19   15.00
   7   2   3  136.89   12.00
   2  -7   3  130.89   13.80
   1  -7  -3   11.60    6.90
   7   1  -3   13.80    5.10
   7   1  -3    8.20    4.50
   1  -7  -3   -2.30    5.40
   1  -7   3    0.50    3.50
   7   1   3    8.30    3.70
  -1   7   3    6.10    5.90
   1  -7   3   10.90    5.00
   7   0  -3   75.79   11.80
   7   0  -3   76.09    9.40
   0  -7  -3  105.99   13.50
   7   0   3   75.79    8.40
  -7   0   3  104.69   14.20
   7   0   3   61.79    8.60
   7  -1  -3    3.30    4.80
   7  -1  -3   -9.60    3.90
  -1  -7  -3   -6.50    7.20
  -1  -7  -3    2.90    5.10
  -1  -7   3    5.90    6.00
   1   7   3   -2.40    4.00
   7  -1   3    8.00    3.30
   7  -2  -3    8.10    4.80
   7  -3  -3    9.80    5.00
  -3  -7  -3    9.10    5.90
  -3  -7  -3   -1.70    6.30
   7  -3  -3    9.80    7.90
  -3  -7   3    7.60    5.90
   7  -3   3    9.00    3.20
  -7   3   3   -0.30    7.10
  -6  -7  -3    3.40    4.50
   7  -6  -3   -2.50    5.40
  -6  -7  -3    9.00    8.60
   7  -6   3   -7.60    4.00
   7  -6   3    0.60    2.20
  -7   6   3  -10.80    7.00
  -6  -7   3   -0.30    7.00
   7  -7  -3   24.10    7.20
   7   7  -3    6.50    3.70
  -7  -7  -3    8.40    4.50
  -7   7   3   32.60    9.00
   7  -7   3    3.50    2.40
   7  -8  -3   26.70    7.70
   8   7  -3   26.80    5.50
  -8  -7  -3   18.60    9.50
   8   7   3   23.50    6.20
   8   7   3   23.30    6.90
   7  -8   3   26.90    3.50
  -8  -7   3   48.20    9.30
  -7   8   3   17.00    8.70
   8   6  -3  754.52   54.09
  -8  -6  -3  814.12   55.79
   6  -8  -3  834.22   56.29
   6  -8   3  859.01   55.29
   8   6   3  806.82   54.49
  -8  -6   3  792.62   57.09
   6  -8   3  814.32   52.39
  -6   8   3  784.22   57.19
   8   6   3  822.42   56.29
   5  -8  -3  153.58   17.10
   8   5  -3  140.19   13.50
  -8  -5  -3  157.08   14.30
   8   5   3  170.28   15.30
  -8  -5   3  156.28   18.10
   5  -8   3  145.09   10.80
   8   5   3  166.58   13.90
   5  -8   3  154.38   15.50
   4  -8  -3 1309.27   77.39
  -8  -4  -3 1016.10   74.99
   8   4  -3 1081.09   74.99
   8   4   3 1129.29   76.19
  -8  -4   3 1186.88   78.29
  -4   8   3 1180.38   77.39
   4  -8   3 1108.29   75.49
   8   4   3 1104.09   74.89
   3  -8  -3    6.90    6.30
  -3   8   3   20.20    8.30
   2  -8  -3   -4.90    5.70
   8   2  -3   -1.90    4.00
  -2   8   3   -2.10    6.80
   8   2   3   -4.50    4.00
   2  -8   3   -7.10    4.80
   8   2   3    9.70    3.90
  -8  -2   3    0.30    7.50
   1  -8  -3   54.59    9.80
   8   1  -3   36.90    6.80
   1  -8   3   37.00    7.70
   8   1   3   34.10    5.40
   0  -8  -3 1813.02  113.59
   8   0  -3 1678.03  111.69
   8   0   3 1639.14  110.79
   8   0   3 1586.84  111.39
  -8   0   3 1800.12  113.49
   0  -8   3 1739.93  112.69
  -1  -8   3  184.38   19.50
  -2  -8  -3  232.28   20.60
   8  -2  -3  205.38   18.80
  -2  -8  -3  192.48   21.00
  -8   2   3  234.28   20.90
  -2  -8   3  239.18   21.40
   8  -2   3  256.17   17.10
  -3  -8  -3    1.70    6.80
   8  -3  -3   -8.60    4.70
  -3  -8  -3   -0.60    5.40
   8  -3   3    3.30    2.80
  -3  -8   3    3.80    6.20
  -8   3   3   -8.80    6.50
  -4  -8  -3  290.77   25.90
  -4  -8  -3  312.57   25.00
   8  -4   3  333.57   21.50
  -4  -8   3  298.67   27.10
  -8   4   3  284.27   25.70
   8  -5  -3   31.40    7.20
  -5  -8  -3   28.50    7.00
   5   8  -3   37.40    5.30
  -5  -8  -3   25.80    9.20
   8  -5   3   24.40    6.10
  -5  -8   3   40.90   10.00
  -8   5   3   30.40    8.80
   8  -5   3   39.10    5.40
  -6  -8  -3   44.20   11.70
  -6  -8  -3   65.29   11.20
   8  -6  -3   33.00    8.00
  -6  -8   3   58.39   11.40
   8  -6   3   37.80    5.60
  -8   6   3   54.09   10.70
   8  -6   3   34.90    7.10
   8  -7  -3   46.90    9.10
   7   8  -3   36.60    6.20
   8  -7   3   28.70    7.30
  -7  -8   3   62.69   11.70
  -8   7   3   63.79   11.60
   8  -7   3   53.59    5.40
   8   8  -3   14.80    4.70
   8  -8   3   27.30    6.70
  -8  -8   3   38.70    9.80
  -8   8   3    8.90    8.60
   8   8   3   27.20    6.20
   8  -8   3   26.10    3.70
   8  -9  -3    8.60    6.60
   9   8  -3    2.90    3.80
   9   8   3    3.80    4.40
  -8   9   3    8.00    8.30
   8  -9   3    8.70    2.70
  -9  -8   3    4.40    6.30
   7  -9  -3   16.40    7.30
   9   7  -3    7.20    4.50
   9   7   3   12.20    7.20
   7  -9   3   11.10    2.80
   9   7   3    8.20    5.10
  -9  -7   3   12.90    7.20
   7  -9   3    6.80    5.80
  -7   9   3   20.30    8.70
   6  -9  -3   10.70    7.30
  -6   9   3   13.90    8.20
   5  -9  -3   24.00    7.80
  -9  -5  -3    6.80    4.10
   9   5  -3   13.20    5.20
   9   5   3    0.50    4.20
  -9  -5   3    2.90    7.30
   5  -9   3    8.30    5.70
  -5   9   3    6.20    8.00
   9   5   3    4.80    4.40
   4  -9  -3   36.30    8.70
   9   4  -3    9.30    5.10
  -9  -4  -3   12.10    4.30
  -9  -4   3   16.30    9.30
   4  -9   3    6.80    5.50
  -4   9   3   33.20    9.10
   9   4   3   10.50    5.10
   9   4   3    7.00    4.30
   9   3  -3   24.30    5.90
   3  -9  -3   32.60    8.30
   3  -9   3    2.60    6.20
  -3   9   3   13.90    8.40
   9   3   3   24.10    6.10
   9   3   3   16.80    4.70
  -9  -3   3   12.50    9.00
   2  -9  -3   18.50    7.10
  -9  -2   3    9.10    9.00
   2  -9   3   33.00    8.10
   1  -9  -3   29.30    9.10
   9   1  -3   27.60    6.40
  -9  -1   3   46.30   11.10
   9   1   3   24.40    6.00
   9   1   3   25.40    5.20
   1  -9   3   27.80    7.70
  -9   0   3  118.19   18.90
   1   9   3  131.79   15.20
   9  -2  -3   54.99   10.10
  -2  -9  -3   85.39   12.50
  -2  -9  -3   74.89   12.20
  -2  -9   3   94.99   15.70
   9  -2   3   68.49   10.50
  -2  -9   3   78.59   11.70
   9  -2   3   73.79    8.30
   2   9   3   81.29   14.70
  -9   2   3   73.39   11.60
  -3  -9  -3   16.70    7.40
   9  -3  -3   16.20    6.80
  -3  -9  -3    8.90    7.60
   9  -3   3   16.60    5.80
  -3  -9   3   15.60    8.00
   9  -3   3   19.20    4.10
  -9   3   3   14.30    8.10
   9  -4  -3   38.00    8.20
   9  -4   3   27.00    6.60
  -4  -9   3   40.60   10.00
  -9   4   3   15.30    8.50
   9  -4   3   32.60    4.70
  -6  -9  -3   43.50   11.40
   6   9  -3   61.09    7.60
   9  -6  -3   27.00    8.00
   9  -6   3   45.60    5.60
   9  -6   3   32.00    7.60
  -9   6   3   39.60   10.60
  -6  -9   3   51.59   12.30
   9  -7  -3  -11.80    5.40
   7   9  -3    6.10    3.20
  -9   7   3    0.20    7.00
  -7  -9   3    2.10    7.50
   9  -7   3   -3.60    4.30
   9  -7   3   -1.90    2.20
   8   9  -3   61.69    7.40
   9  -8  -3   61.19   10.20
  -8  -9   3   61.49   12.10
   8   9   3   42.60    7.70
  -9   8   3   36.10   10.10
   9  -8   3   47.00    5.60
   9   9  -3   -6.90    3.00
   9  -9  -3    3.10    6.20
  -9   9   3    1.00    8.00
  -9  -9   3   -4.50    6.40
   9   9   3   -2.40    4.30
   9  -9   3   -0.40    2.30
   9 -10  -3   18.50    7.90
   9 -10   3   21.30    3.90
 -10  -9   3    4.70    6.90
  10   9   3   11.80    5.20
  -9  10   3   28.80    9.90
  10   8  -3   -1.10    4.10
   8 -10  -3   -2.60    6.50
  -8  10   3    0.40    8.10
   8 -10   3    0.10    2.60
 -10  -8   3   -1.50    5.70
  10   8   3   -0.30    3.80
   7 -10  -3   14.20    7.90
  10   7  -3    3.70    4.60
  -7  10   3   15.00    9.30
   7 -10   3   15.30    3.10
 -10  -7   3   15.60    8.00
  10   7   3   13.70    5.10
  10   6  -3   32.80    6.40
   6 -10  -3   33.60    9.00
  -6  10   3   25.00    9.80
 -10  -6   3   45.30   10.50
  10   6   3   44.00    6.90
   6 -10   3   29.80    4.00
   6 -10   3    5.60   10.50
  10   5  -3  109.49   13.30
   5 -10  -3  138.49   17.20
  -5  10   3  150.48   19.60
  10   5   3  134.19   13.00
 -10  -5   3  165.08   21.10
  10   5   3  150.68   15.60
   5 -10   3  133.99   15.40
   4 -10  -3    1.10    7.30
  10   4  -3   -5.10    4.40
 -10  -4  -3    2.40    5.60
  10   4   3    1.00    4.40
  10   4   3   -3.60    3.80
 -10  -4   3   -0.80    7.10
   4 -10   3   -3.10    5.40
  -4  10   3   -2.80    8.70
   3 -10  -3   27.10    7.40
 -10  -3   3   -0.10    7.90
  10   3   3    0.00    3.80
  10   2  -3   88.79   10.60
  10   2   3   74.29   11.70
  10   2   3   85.79    9.00
  10   1  -3  162.68   14.90
   1 -10   3  124.29   17.50
  10   1   3  168.98   15.50
  -1  10   3  116.39   19.10
   1 -10   3  133.89   16.70
  10   1   3  167.08   13.10
   0 -10  -3  200.48   19.80
  10   0  -3  148.79   15.60
  10   0   3  157.08   13.90
  10   0   3  168.08   15.60
  -2 -10  -3   28.60    9.00
  10  -2  -3    6.20    6.50
  -2 -10  -3   23.70    8.70
  -2 -10   3   -2.30    6.40
  10  -2   3   12.10    5.70
  -2 -10   3   21.90    9.70
 -10   2   3   13.10    7.60
  10  -2   3   12.40    4.10
  10  -3  -3   -1.40    5.90
  -3 -10  -3   12.20    8.10
  -3 -10  -3   18.00    8.50
  10  -3   3    8.50    5.50
 -10   3   3    0.80    8.80
  10  -3   3    5.90    3.50
  -4 -10  -3  579.44   41.60
  10  -4  -3  531.15   39.70
  -4 -10   3  513.95   41.90
  10  -4   3  568.14   37.10
  10  -4   3  541.75   39.60
 -10   4   3  572.04   41.70
  10  -5  -3    5.60    7.00
  -5 -10  -3   35.70    9.80
 -10   5   3   -2.20    8.10
  -5 -10   3    4.30    9.60
  10  -5   3   12.50    5.90
  10  -5   3   15.40    3.60
  10  -6  -3  772.52   56.99
  -6 -10  -3  950.70   59.39
  10  -6   3  794.42   56.69
  10  -6   3  820.82   54.19
  -6 -10   3  850.51   60.59
 -10   6   3  790.12   58.59
  10  -8  -3   76.39   11.50
   8  10  -3   50.49    7.60
   8  10   3   82.39   10.20
  -8 -10   3   87.09   14.30
  10  -8   3   72.49    7.00
  10  -9  -3   -3.10    6.20
   9  10  -3   -3.10    3.20
   9  10   3   -2.30    4.60
  10  -9   3    3.30    2.80
 -10   9   3   -5.60    8.50
  -9 -10   3   -2.90    7.20
  10 -10  -3   56.49   11.00
 -10  10   3   40.80   11.60
 -10 -10   3   55.19   11.60
  10  10   3   81.99   10.40
  10 -10   3   70.39    7.40
  11   9  -3   -7.50    4.50
   9 -11  -3   -2.70    7.20
 -11  -9   3    8.90    6.70
  -9  11   3   -3.60    8.40
  11   9   3    3.10    4.80
  11   8  -3   -4.00    4.30
   8 -11  -3   15.30    8.10
  11   8   3    3.20    4.50
  -8  11   3   -2.60    8.50
 -11  -8   3    2.70    7.20
   7 -11  -3    7.50    7.60
  11   7  -3   -1.90    4.90
  11   7   3   15.20    5.30
  -7  11   3    9.60    8.60
 -11  -7   3    9.60    7.90
   6 -11  -3    4.40    6.70
  11   6  -3   -2.20    4.40
  11   6   3   -0.90    3.90
  -6  11   3    6.20    8.40
 -11  -6   3    6.30    7.70
   5 -11  -3   15.20    8.20
  11   5  -3   39.20    7.00
  11   4  -3   -1.80    5.20
   4 -11  -3  -11.30    6.70
  11   4   3    0.00    3.80
  -4  11   3    7.70   10.50
 -11  -4   3   11.70    7.90
   3 -11  -3   -4.50    6.50
  11   3  -3   -6.30    4.20
   3 -11   3   -8.10    6.50
 -11  -3   3   -7.20    7.80
  11   3   3   -3.00    4.20
  11   3   3   -1.00    3.40
  -3  11   3    1.50   10.00
  11   2  -3   -7.50    5.10
   2 -11  -3    0.40    7.10
  11   2   3    2.40    5.10
  -2  11   3   15.30   10.20
 -11  -2   3   -5.50    8.80
   2 -11   3    8.20    6.50
  11   2   3    3.20    3.80
   2 -11   3    1.30    6.60
  11   1  -3  -12.80    4.70
   1 -11  -3   -5.70    7.80
   1 -11   3   -2.90    6.60
   1 -11   3   -2.40    5.10
 -11  -1   3    2.60    8.40
  11   1   3   -5.50    3.30
  -1  11   3    2.10    7.50
  11   1   3   -2.20    4.60
  11   0  -3   17.80    6.50
   0 -11  -3   61.39   11.10
  11   0   3   24.00    6.50
   0  11   3    6.30    7.60
  11   0   3   24.40    5.10
   0 -11   3   39.40    9.70
 -11   0   3   17.40   10.20
   0 -11   3    5.00    6.70
  11  -1  -3   20.60    7.00
  -1 -11  -3   26.30    9.30
 -11   1   3   15.90    8.80
  -1 -11   3   41.60   13.70
  11  -1   3   22.40    5.30
  11  -1   3   23.60    6.30
   1  11   3   11.10    7.70
  11  -2  -3    6.60    7.30
  -2 -11  -3   25.90    9.20
  11  -2   3   20.70    4.70
 -11   2   3   11.20    7.80
  -2 -11   3   40.30   12.80
  -2 -11   3   37.00    9.90
  11  -2   3   24.70    6.80
  -3 -11  -3   18.00    9.20
  11  -3  -3   18.90    7.60
  -3 -11   3   16.00    9.70
  11  -3   3   17.80    6.60
  11  -3   3   23.70    4.70
 -11   3   3    8.00    8.80
  -4 -11  -3    7.40    8.80
  11  -4  -3   -9.00    5.90
  -4 -11   3    3.20    7.30
  11  -4   3   -4.00    5.10
  11  -4   3    3.80    3.20
 -11   4   3   -7.10    7.80
  11  -4   3   -4.20    5.10
  11  -5  -3    6.90    6.50
  -5 -11   3    4.40    8.60
 -11   5   3   -3.90    7.60
  11  -5   3    2.20    3.20
  11  -6  -3   33.50    9.10
  -6 -11  -3   39.80   10.70
 -11   6   3   17.90    9.10
  -6 -11   3   35.00   10.50
  11  -6   3   26.90    4.60
  11  -7  -3   15.40    7.40
  -7 -11   3   34.00   11.70
  11  -7   3   22.00    4.20
 -11   7   3    7.40    8.20
  11  -8  -3   37.30    9.40
  -8 -11   3   46.20   11.70
   8  11   3   44.60    7.90
  11  -8   3   41.10    5.20
 -11   8   3   16.10    9.20
  11  -9  -3    0.90    7.30
  -9 -11   3    1.70    7.40
 -11   9   3   -4.50    8.70
   9  11   3   12.20    5.90
  11  -9   3    2.30    3.30
  11 -10  -3    9.40    7.50
 -10 -11   3   10.70    8.40
 -11  10   3   -5.50    9.30
  11 -10   3    3.30    3.50
  10  11   3    3.50    5.10
  11 -11  -3    2.40    7.40
 -11 -11   3    1.10    6.40
  11  11   3   10.90    5.70
 -11  11   3    1.80    9.70
  11 -12  -3    5.70    8.40
  12  11   3    1.90    6.20
 -12 -11   3   14.30    7.80
  10 -12  -3  130.69   17.10
 -10  12   3   76.49   15.90
 -12 -10   3  107.79   16.20
  12  10   3  104.39   12.50
  12   9  -3   15.90    6.30
   9 -12  -3   14.30    9.00
  -9  12   3    7.90   10.10
 -12  -9   3   25.50    9.30
  12   9   3   30.40    6.30
  12   8  -3   98.59   12.30
   8 -12  -3   87.39   14.00
  -8  12   3   93.39   15.70
  12   8   3  116.19   11.70
 -12  -8   3   96.99   17.40
   7 -12  -3   11.70    8.20
  12   7  -3   21.00    6.10
  -7  12   3   18.70   10.40
  12   7   3   21.40    5.60
 -12  -7   3   30.00   10.70
  12   6  -3  490.85   37.40
   6 -12  -3  506.45   39.80
  12   6   3  524.25   36.90
  -6  12   3  514.35   42.80
 -12  -6   3  588.24   43.50
  12   5  -3   20.70    6.70
   5 -12  -3   27.20    8.90
  -5  12   3   28.90   12.00
 -12  -5   3   33.90   10.00
  12   5   3   30.90    6.00
  12   4  -3  156.88   15.30
   4 -12  -3  166.58   17.70
  12   4   3  162.48   14.20
  -4  12   3  139.29   23.30
   3 -12  -3   -7.70    6.70
  12   3  -3    0.70    5.20
  12   3   3   20.90    5.10
  -3  12   3   23.80   12.10
 -12  -3   3   -0.20    9.30
   2 -12  -3   17.60    8.40
  12   2  -3   12.40    6.50
 -12  -2   3   -6.90    8.80
  12   2   3   16.80    4.60
   2 -12   3   25.80    8.20
  -2  12   3    8.50    8.20
  12   1  -3   61.39    9.50
   1 -12  -3   62.29   11.70
  12   1   3   57.59    8.30
   1 -12   3   55.69   10.60
 -12  -1   3   59.29   13.40
   0 -12  -3  212.78   20.90
  12   0  -3  185.48   17.80
  12   0   3  206.58   16.00
 -12   0   3  186.58   22.10
   0 -12   3  201.88   21.50
  12  -1  -3    6.90    6.00
  -1 -12  -3   10.30    8.10
  -1 -12   3   26.30   12.70
 -12   1   3    2.60    7.90
  12  -1   3   17.30    4.30
  12  -2  -3    5.70    5.80
  -2 -12  -3   -4.00    7.90
  -2 -12   3   35.90   12.00
  12  -2   3   14.00    4.20
 -12   2   3    6.60    7.30
  12  -3  -3   43.30    9.70
  -3 -12  -3   34.00   11.30
  -3 -12   3   55.19   12.30
  12  -3   3   44.10    6.00
  -4 -12  -3    7.20    9.20
  12  -4  -3   20.50    7.90
  12  -4   3   23.00    4.50
  -4 -12   3   29.40    9.10
 -12   4   3    0.10    8.30
  -5 -12  -3   77.89   13.40
  12  -5  -3   58.59   11.20
  12  -5   3   65.39    7.60
  -5 -12   3   55.89   11.90
  12  -6  -3  166.28   18.50
  -6 -12  -3  202.88   21.10
 -12   6   3  149.79   20.30
  12  -6   3  181.08   14.10
  -6 -12   3  209.38   24.70
  12  -7  -3    3.20    6.90
  12  -7   3   14.20    3.70
  -7 -12   3   11.60    9.70
 -12   7   3   -4.30    7.90
  12  -8  -3  -11.00    6.00
  12  -8   3   -1.20    3.10
 -12   8   3   -5.90    8.60
   8  12   3   -2.60    5.00
  -8 -12   3   17.00    8.60
  12  -9  -3   16.10    7.70
  -9 -12   3   15.00    9.90
  12  -9   3    8.60    3.80
   9  12   3   18.60    6.40
 -12   9   3   -3.20    9.30
  12 -10  -3  192.08   21.30
  10  12   3  212.78   18.70
 -10 -12   3  202.98   25.20
  12 -10   3  228.08   16.80
  12 -11  -3   12.30    8.50
  11  12   3   27.00    6.70
 -11 -12   3   12.80    8.10
  12 -12  -3   46.60   11.60
  12  12   3   42.10    8.20
 -12 -12   3   25.80    9.30
  12 -13  -3  -17.10    7.20
  13  12   3   -1.60    5.10
  11 -13  -3   -5.00    8.20
  13  11   3   -7.00    4.80
  13  10  -3    8.20    5.90
  10 -13  -3   -2.80    8.40
 -13 -10   3   23.80    9.00
  13  10   3   17.40    6.40
  13   9  -3    5.10    5.50
   9 -13  -3   11.00    8.60
  -9  13   3   22.60   11.80
  13   9   3   11.70    5.60
 -13  -9   3   19.90    9.30
   8 -13  -3    3.10    8.80
  13   8  -3    5.90    6.50
 -13  -8   3   22.90   10.70
  13   8   3   15.40    5.90
  -8  13   3    5.30   11.20
  13   7  -3    0.40    5.00
   7 -13  -3   -6.80    6.70
  13   7   3    2.10    4.40
 -13  -7   3    1.10    9.50
  -7  13   3   -4.40   11.00
   6 -13  -3   -5.30    6.90
  13   6  -3   21.10    6.20
 -13  -6   3    4.60    7.60
  -6  13   3    1.70   11.40
  13   6   3    1.90    4.40
   5 -13  -3   -0.30    7.00
  13   5  -3   13.70    6.00
  -5  13   3    8.30   11.60
  13   5   3    8.20    4.80
 -13  -5   3   15.60   10.00
  13   4  -3   18.10    6.50
   4 -13  -3   10.60    8.10
  13   4   3   15.00    5.10
  -4  13   3   14.60   11.90
 -13  -4   3   23.90   11.40
   3 -13  -3   14.00    8.50
  13   3  -3   18.00    6.40
  -3  13   3   -3.60    8.00
  13   3   3   11.40    4.60
 -13  -3   3    0.60    9.80
   2 -13  -3   13.00    8.80
  13   2  -3    5.80    5.90
  13   2   3   17.10    5.00
   2 -13   3   15.90    8.10
 -13  -2   3   -4.20    8.50
  13   1  -3    3.30    5.60
   1 -13  -3    2.40    8.00
  -1  13   3    2.00    8.40
  13   1   3    4.40    3.60
 -13  -1   3   -2.20    8.80
   1 -13   3    3.60    6.10
   0 -13  -3    7.50    7.90
  13  -1  -3   -1.40    5.70
  -1 -13  -3   23.50    8.70
   1  13   3    1.50    9.10
  -1 -13   3   -3.10   10.90
  13  -1   3    2.90    3.50
 -13   1   3   -3.40    6.80
  -3 -13  -3   -6.20    8.20
  13  -3   3   10.90    4.20
  -3 -13   3   11.00    9.30
 -13   3   3   -1.00    8.20
  -4 -13  -3    5.20    8.90
  13  -4  -3    2.60    6.80
  -4 -13   3   19.50    7.90
 -13   4   3   -2.40    8.20
  13  -4   3    1.70    3.50
  13  -5  -3   -0.90    6.60
  -5 -13  -3   12.90    9.60
  -5 -13   3    5.80    7.00
  13  -5   3    1.80    3.70
 -13   5   3    1.90    8.20
  13  -7  -3   22.60    8.30
  -7 -13   3    8.80    9.30
  13  -7   3    0.50    3.30
   7  13   3    6.00    5.70
 -13   7   3   -3.00    8.50
  13  -8  -3    5.40    7.20
 -13   8   3   -1.60    9.30
  13  -8   3   -1.30    3.20
  -8 -13   3   -6.40   10.40
   8  13   3   -3.30    5.20
  13  -9  -3   -4.00    6.80
  -9 -13   3    1.50    8.50
  13  -9   3    0.20    3.60
   9  13   3   -2.20    5.40
  13 -10  -3    6.80    8.40
  13 -10   3   11.70    4.70
 -10 -13   3   17.10   10.00
  10  13   3   12.60    6.30
  13 -11  -3    7.60    9.00
  11  13   3   18.00    6.70
 -11 -13   3    7.70    8.80
  13 -12  -3   17.60    9.90
  12  13   3   19.30    7.00
  13 -13  -3   -1.50    9.00
  13  13   3   15.10    6.60
  13 -14  -3  -12.70    8.40
  14  13   3   -2.00    5.50
  12 -14  -3   21.30   11.10
  14  12   3   32.70    7.60
  11 -14  -3   -3.20    8.40
  14  11   3    5.60    5.80
  10 -14  -3    0.80    8.70
  14  10  -3  -11.50    5.50
  14  10   3   -7.40    5.20
  14   9  -3    8.80    6.20
   9 -14  -3   -1.80    8.10
 -14  -9   3   11.40   14.50
  14   9   3    1.50    5.40
  14   8  -3    2.90    5.50
   8 -14  -3   -3.10    8.10
  14   8   3    8.90    5.50
 -14  -8   3    6.00   10.20
   7 -14  -3   22.70    9.90
  14   7  -3   21.80    7.00
  -7  14   3   24.60   14.70
 -14  -7   3   29.90   10.50
  14   7   3   22.30    6.30
   6 -14  -3  163.58   19.20
  14   6  -3  177.68   16.70
  -6  14   3  141.99   26.80
 -14  -6   3  169.28   23.10
  14   6   3  169.38   15.50
  14   5  -3    5.00    5.60
   5 -14  -3    0.20    7.20
  14   5   3    4.80    4.80
 -14  -5   3   -3.40    9.50
  -5  14   3   14.00   14.30
   4 -14  -3    1.20    7.90
  14   4  -3    7.60    5.80
 -14  -4   3   -6.50   10.10
  14   4   3    5.90    5.10
  -4  14   3   -1.40   10.70
   3 -14  -3   22.00    9.90
  14   3  -3   25.70    7.50
  -3  14   3   10.60   10.20
 -14  -3   3    6.30   10.00
  14   2  -3  124.09   14.00
   2 -14  -3  127.59   16.40
 -14  -2   3  116.89   21.10
   2 -14   3  115.89   17.40
  14   2   3  124.19   12.20
  14   1  -3    5.10    6.50
   1 -14  -3  -10.00    7.40
   1 -14   3   -2.30    6.50
 -14  -1   3   -5.40    9.00
  14   1   3    2.80    4.00
   0 -14  -3  216.98   21.90
  14   0  -3  171.98   18.50
   0 -14   3  224.98   25.70
 -14   0   3  166.08   21.60
  14   0   3  188.18   15.80
  14  -1  -3   -1.40    6.10
  14  -1   3    3.00    3.90
 -14   1   3    2.10    7.20
  -1 -14   3   41.00   15.50
  14  -2  -3    4.70    6.50
  -2 -14  -3    2.10    9.20
 -14   2   3   14.40    9.00
  14  -2   3    0.30    3.90
  -2 -14   3   46.60   12.80
  -3 -14  -3    1.50    9.00
  14  -3  -3   -2.50    6.50
  -3 -14   3   14.20   10.80
 -14   3   3   -8.30    8.80
  14  -3   3   12.20    4.50
  14  -4  -3  307.17   26.40
  -4 -14  -3  295.77   28.80
  14  -4   3  312.97   23.20
  -4 -14   3  342.17   31.20
  14  -5  -3    7.50    7.50
  -5 -14  -3  -16.60    9.50
  14  -5   3    9.50    4.20
  -5 -14   3    8.00    8.80
 -14   5   3   10.40    9.40
  14  -6  -3  253.17   24.10
  -6 -14  -3  246.78   26.30
  14  -6   3  249.58   19.60
 -14   6   3  268.17   29.00
  -6 -14   3  287.37   29.80
  14  -7  -3    7.90    7.60
  14  -7   3   -3.90    3.40
  -7 -14   3    6.00    9.00
   7  14   3    2.10    5.50
  14  -8  -3   -3.60    6.90
  -8 -14   3   -4.20   11.10
  14  -8   3    1.00    3.90
   8  14   3   -1.00    5.50
  14  -9  -3   -8.10    7.50
  14  -9   3    8.90    4.60
  -9 -14   3    2.30    9.60
   9  14   3    6.30    6.40
  14 -10  -3   -8.00    7.60
 -10 -14   3    9.90    8.70
  10  14   3    3.20    5.80
  14 -10   3    6.50    4.50
  14 -11  -3    1.00    8.80
  11  14   3    5.50    6.20
  14 -12  -3    4.90    9.10
  12  14   3    3.20    6.20
  14 -13  -3    4.00    9.30
  13  14   3   -1.00    6.00
  14 -14  -3   -2.50    9.20
  14  14   3    5.30    6.50
  14 -15  -3    3.40   10.50
  15  14   3    3.00    6.60
  13 -15  -3   -0.60    9.50
  15  13   3   -6.30    5.60
  12 -15  -3   -4.90    9.30
  15  12   3   -0.90    5.60
  11 -15  -3   -1.60    8.60
  15  11   3   -2.80    5.30
  15  10  -3   -2.30    6.30
  10 -15  -3    4.60    9.10
  15  10   3    5.00    5.60
   9 -15  -3    4.60    9.00
  15   9  -3    3.90    6.30
  15   9   3   10.10    5.90
   8 -15  -3   -2.80    7.90
  15   8  -3   -6.50    5.50
  15   8   3    2.70    5.60
  15   7  -3    4.40    6.20
   7 -15  -3    4.40    8.20
  15   7   3   11.30    5.90
   6 -15  -3    1.50    7.80
  15   6  -3    0.10    5.60
 -15  -6   3   -5.10   11.10
  -6  15   3  -18.30   12.70
  15   6   3    3.40    4.70
  15   5  -3   -6.70    5.30
   5 -15  -3   10.40    8.40
 -15  -5   3    2.80   10.70
  15   5   3    3.30    4.80
  -5  15   3   13.00   13.60
  15   4  -3  -10.60    5.50
   4 -15  -3   -1.90    7.90
 -15  -4   3    0.80   11.10
  15   4   3   -7.40    4.20
  15   3  -3   -5.80    5.90
   3 -15  -3   -2.20    8.00
  15   3   3    1.80    4.60
   3 -15   3   18.90    8.90
 -15  -3   3  -13.90    9.90
  -3  15   3    2.40    9.10
  15   2  -3   -0.10    5.70
   2 -15  -3   -7.00    8.00
  15   2   3    0.90    4.30
 -15  -2   3  -14.50    9.20
   2 -15   3   -5.10    6.00
   1 -15  -3    8.10    8.30
  15   1  -3    8.70    6.90
   1 -15   3    0.20    8.70
  -1  15   3   15.10    9.20
 -15  -1   3  -10.30    8.10
  15   1   3   -3.10    4.00
  15   0  -3   18.40    7.90
   0 -15  -3   20.50    9.50
  15   0   3   12.70    4.80
 -15   0   3    2.10    9.40
   0  15   3    6.20   10.20
   0 -15   3   20.50   13.20
  -1 -15  -3   46.60   12.20
  -1 -15   3   75.49   19.20
  15  -2  -3   19.20    7.70
  -2 -15   3   23.80   14.20
 -15   2   3    3.20    9.10
  15  -2   3   21.50    5.60
  15  -3  -3   11.00    7.80
 -15   3   3   12.60   15.40
  -4 -15  -3    9.90    9.30
  15  -4  -3    3.10    7.80
  -4 -15   3    4.70    8.60
  15  -4   3    2.50    4.40
  15  -5  -3    3.60    7.70
  -5 -15  -3    9.10    9.70
  -5 -15   3    2.20    8.00
  15  -5   3   -1.70    4.00
  15  -6  -3    2.80    7.90
  -6 -15   3   15.60   10.60
  15  -6   3    9.00    4.40
  15  -8  -3    3.00    8.20
  15  -8   3    9.20    4.70
  -8 -15   3    3.80   13.50
   8  15   3   11.30    7.30
  15  -9  -3    4.60    8.90
   9  15   3    8.40    6.80
  -9 -15   3   23.10   13.80
  15  -9   3   15.10    5.50
  15 -10  -3    4.00    8.90
  15 -10   3   18.10    5.60
  10  15   3   11.70    6.60
  15 -11  -3    1.80    8.90
  11  15   3    3.40    6.70
  15 -12  -3   -8.50    8.60
  12  15   3   -4.50    6.10
  15 -13  -3   -3.20    9.00
  13  15   3   -5.00    5.80
  15 -14  -3    3.80   10.10
  14  15   3    2.30    6.50
  15 -15  -3    5.60   10.60
  15  15   3    3.10    6.70
  14 -16  -3   25.50   12.80
  16  14   3   31.40    8.60
  13 -16  -3    2.30   10.30
  16  13   3    1.90    6.30
  12 -16  -3   72.89   15.80
  16  12   3  106.89   13.40
  11 -16  -3    3.40    9.80
  16  11   3    5.80    6.00
  16  10  -3   13.70    9.90
  10 -16  -3   11.90   10.00
  16  10   3    6.30    6.10
   9 -16  -3   24.80   10.50
  16   9  -3   10.40    7.10
  16   9   3    1.30    5.70
  16   8  -3  163.68   18.20
   8 -16  -3  172.58   21.50
  16   8   3  194.88   17.40
   7 -16  -3    2.90    8.20
  16   7  -3   -0.60    6.30
  16   7   3    4.70    5.40
  16   6  -3   64.39   11.30
   6 -16  -3   76.79   13.50
  16   6   3   80.39   11.30
  16   5  -3   -1.40    6.00
   5 -16  -3   -2.20    8.50
  16   5   3    0.30    5.10
   4 -16  -3    2.10    8.90
  16   4  -3   14.80    7.40
  -4  16   3   -2.30    9.70
  16   4   3   13.40    5.70
  16   3  -3    8.00    6.90
   3 -16  -3   -0.70    8.40
  16   3   3    3.80    5.00
  -3  16   3   20.30   11.40
  16   2  -3   -3.20    5.80
   2 -16  -3   -6.30    8.10
  -2  16   3   -2.10    8.20
  16   2   3   -5.50    4.00
  16   1  -3   -2.70    6.60
   1 -16  -3    9.30    9.40
  -1  16   3    8.00   10.10
  16   1   3    3.90    4.50
   1 -16   3   -3.30   12.60
  16   0  -3   34.60    9.30
   0 -16  -3   32.60   11.50
   0 -16   3   62.59   18.70
  16   0   3   37.60    7.10
  16  -1  -3    1.60    6.90
  -1 -16  -3   -0.90    9.30
  16  -1   3   -1.30    4.40
  -1 -16   3   -4.70   14.70
  -2 -16  -3   10.70   10.30
  16  -2  -3    9.60    7.70
  -2 -16   3   17.00   16.00
  16  -2   3    7.10    5.00
  -3 -16  -3   -5.70    9.20
  16  -3  -3   18.10    8.10
  16  -3   3    9.00    5.10
  -3 -16   3    1.00   11.60
  -4 -16  -3  288.57   28.50
  16  -4  -3  291.27   26.60
  -4 -16   3  302.07   32.40
  16  -4   3  311.97   23.10
  16  -5  -3   10.00    8.30
  -5 -16  -3   14.80   10.60
  -5 -16   3   10.80   10.40
  16  -5   3    9.50    5.10
  16  -6  -3  161.88   19.80
  16  -6   3  159.48   14.80
  16  -7  -3   -3.30    8.10
   7  16   3    5.70    6.60
  16  -7   3   -1.10    4.30
  16  -8  -3   56.49   12.80
  16  -8   3   60.79    8.70
   8  16   3   67.19   11.20
  16  -9  -3   -7.30    8.90
   9  16   3    5.90    6.70
  16  -9   3    4.10    5.30
  16 -10  -3  115.79   18.90
  10  16   3  136.09   15.80
  16 -10   3  148.99   14.70
  16 -11  -3   -7.30    8.70
  11  16   3    3.40    7.00
  16 -12  -3   -2.10    9.70
  12  16   3   22.50    7.70
  16 -13  -3    1.80   10.20
  13  16   3    1.40    6.50
  16 -14  -3   10.80   11.20
  14  16   3   18.80    7.90
  13 -17  -3    4.70   10.60
  17  13   3   -4.40    6.00
  12 -17  -3    4.80   10.90
  17  12   3    1.50    6.50
  11 -17  -3   11.70   10.90
  17  11   3    5.00    6.50
  10 -17  -3    4.40    9.70
  17  10   3   16.10    7.00
   9 -17  -3   -0.80    8.90
  17   9  -3    8.80    7.20
  17   9   3    4.20    6.10
  17   8  -3   17.30    8.00
   8 -17  -3    8.70    9.70
  17   8   3    9.40    6.40
   7 -17  -3    2.20    9.20
  17   7   3   10.00    6.30
  17   6  -3    2.30    6.70
   6 -17  -3   -3.30    9.10
  17   6   3    1.10    5.10
   5 -17  -3   25.80   10.30
  17   5  -3    7.70    7.30
  17   5   3   11.40    5.80
   4 -17  -3    3.20    9.20
  17   4  -3   12.60    7.70
  17   4   3   12.10    5.60
   3 -17  -3   -5.90    9.00
  17   3  -3    4.90    7.20
  17   3   3   -1.50    4.70
  17   2  -3   -0.80    6.50
   2 -17  -3   -7.50    8.80
  17   2   3   -0.10    4.80
  -2  17   3   34.60   16.90
  17   1  -3   -9.60    7.10
   1 -17  -3  -14.00    8.70
  -1  17   3    2.00   10.70
  17   1   3   -1.90    4.90
   0 -17  -3   -3.70    9.80
  17   0  -3   -8.90    6.80
  17   0   3    0.20    4.80
  -1 -17  -3   -7.20    9.60
  17  -1  -3   -6.60    7.10
  17  -1   3    2.90    5.10
  17  -2  -3    3.80    7.90
  -2 -17  -3   10.50   10.90
  17  -2   3    7.50    5.10
  17  -3  -3    5.80    8.00
  -3 -17  -3   39.60   11.90
  17  -3   3   10.50    5.50
  -4 -17  -3  -13.20    9.60
  17  -4  -3    2.00    8.30
  17  -4   3   -6.30    4.80
  17  -5  -3   -1.40    8.60
  -5 -17  -3   -9.40    9.80
  17  -5   3   -2.70    4.70
  17  -6  -3   12.00    9.40
   6  17   3   15.80    7.40
  17  -6   3    2.90    5.10
  17  -7  -3   22.10   10.60
  17  -7   3    3.80    5.30
   7  17   3   16.30    7.50
  17  -8  -3   -4.60    8.60
  17  -8   3    6.00    5.60
   8  17   3    9.90    7.50
  17  -9  -3   -2.70    9.20
   9  17   3    6.90    6.80
  17  -9   3   10.10    6.00
  17 -10  -3    7.70    9.60
  17 -10   3    3.40    5.90
  10  17   3    3.30    6.60
  17 -11  -3    2.20   10.10
  11  17   3    5.40    7.10
  17 -12  -3    9.70   10.30
  12  17   3    1.20    6.40
  17 -13  -3   15.00   11.50
  13  17   3    8.20    7.10
  12 -18  -3   17.50   12.40
  18  12   3   17.40    7.50
  11 -18  -3   17.80   11.20
  18  11   3    1.90    6.00
  10 -18  -3   12.90   10.60
  18  10   3    0.00    6.10
  18   9  -3   14.50    8.00
   9 -18  -3   20.60   11.40
  18   9   3    2.20    5.90
  18   8  -3  147.59   18.00
   8 -18  -3  151.88   21.30
  18   8   3  147.09   15.90
   7 -18  -3    1.00    9.80
  18   7  -3    8.70    7.50
  18   7   3   -0.40    5.70
   6 -18  -3   77.29   15.70
  18   6  -3   83.59   13.10
  18   6   3   94.39   12.70
   5 -18  -3    2.00    9.50
  18   5  -3   10.80    8.00
  18   5   3   -1.90    5.50
   4 -18  -3   68.59   14.60
  18   4  -3   40.70   10.60
  18   4   3   57.69    9.20
   3 -18  -3   10.50   10.40
  18   3  -3   -1.50    7.00
  18   3   3   15.60    6.20
  18   2  -3  118.49   16.00
   2 -18  -3  116.39   18.10
  18   2   3  137.19   14.20
  18   1  -3    4.90    7.70
   1 -18  -3   -0.90   10.20
  18   1   3    0.90    5.20
  18   0  -3   -9.40    7.00
   0 -18  -3   -6.90    9.90
  18   0   3   -0.60    5.00
  -1 -18  -3   16.20   11.00
  18  -1  -3   -7.30    7.10
  18  -1   3   -2.60    4.80
  -2 -18  -3   28.70   12.00
  18  -2  -3   22.30    9.80
  18  -2   3    3.90    5.70
  18  -3  -3   -8.00    8.20
  -3 -18  -3    7.10   10.70
  18  -3   3    1.00    5.00
  18  -4  -3   13.60    9.60
  -4 -18  -3   -2.80   10.80
  18  -4   3    6.00    5.50
  18  -5  -3   -0.40    8.20
  18  -5   3   -0.20    5.30
  18  -6  -3   -2.00    8.60
   6  18   3    0.60    6.50
  18  -6   3    4.10    5.60
  18  -7  -3    1.90    9.20
   7  18   3   -2.00    7.20
  18  -7   3   -1.50    5.40
  18  -8  -3   13.40    9.80
  18  -8   3   14.70    6.60
   8  18   3   16.80    7.80
  18  -9  -3    6.80   10.30
   9  18   3   13.70    7.60
  18  -9   3    7.00    6.60
  18 -10  -3   55.49   14.40
  10  18   3   52.29   10.80
  18 -10   3   52.39   12.30
  18 -11  -3    2.80   10.40
  11  18   3    9.10    7.30
  18 -12  -3   -5.50    9.40
  12  18   3   -3.90    6.60
  19  10   3   -1.00    6.20
  19   9  -3    0.90    8.00
  19   9   3    5.90    6.50
  19   8  -3   10.90    8.40
  19   8   3    5.60    6.40
  19   7  -3   10.50    8.20
  19   7   3   -0.80    6.00
  19   6  -3    8.40    8.40
   6 -19  -3    9.40   11.90
  19   6   3    6.00    6.60
   5 -19  -3   16.20   12.00
  19   5  -3    8.70    8.50
  19   5   3   14.10    7.00
  19   4  -3    2.10    8.00
   4 -19  -3   11.70   11.50
  19   4   3    1.60    6.00
  19   3  -3    5.00    7.80
   3 -19  -3    7.20   10.30
  19   3   3    3.90    6.00
   2 -19  -3    4.10   10.90
  19   2  -3    3.00    8.30
  19   2   3    4.60    6.00
  19   1  -3   14.70    9.00
   1 -19  -3   24.50   12.50
  19   1   3   12.20    6.40
   0 -19  -3    9.00   11.70
  19   0  -3   15.00    9.40
  19   0   3   11.90    6.30
  -1 -19  -3    1.50   11.10
  19  -1  -3   -8.10    7.90
  19  -1   3    5.90    5.80
  -2 -19  -3   23.80   11.90
  19  -2  -3    2.70    8.80
  19  -2   3    8.60    5.70
  -3 -19  -3   18.50   12.80
  19  -3  -3   -1.10    8.60
  19  -3   3    0.70    5.10
  -4 -19  -3    8.70   12.70
  19  -4  -3   -3.40    8.80
  19  -4   3   -2.20    5.60
  19  -5  -3   14.20   10.20
  19  -5   3   -9.00    5.70
  19  -6  -3    1.20    9.40
  19  -6   3   -0.10    5.70
  19  -7  -3   10.30    9.70
  19  -7   3    6.70    6.30
  19  -8  -3   -2.00   10.00
  19  -8   3    3.70    6.40
  19  -9  -3   -5.00    9.60
  19  -9   3    3.50    6.40
  19 -10  -3    2.40    9.90
  20   8  -3    1.30    8.00
  20   8   3   -4.80    6.00
  20   7  -3    9.10    8.90
  20   7   3   -0.40    6.20
  20   6  -3   -7.10    8.30
  20   6   3   -1.10    6.20
  20   5  -3   -0.70    8.30
  20   5   3    4.40    6.30
  20   4  -3    7.00    9.20
  20   4   3   26.80    8.10
  20   3  -3   13.80    9.20
  20   3   3    4.70    6.30
  20   2  -3   89.59   15.40
  20   2   3  119.99   14.40
  20   1  -3    3.80    8.90
  20   1   3   -5.00    6.20
  20   0  -3   -7.10    8.50
  20   0   3    7.30    6.50
  20  -1  -3   12.40    9.90
  20  -1   3   10.80    6.80
  20  -2  -3  173.48   22.10
  20  -2   3  183.78   17.90
  20  -3  -3    4.90    9.60
  20  -3   3    2.70    6.10
  20  -4  -3   53.99   13.90
  20  -4   3   74.19   10.70
  20  -5  -3    8.20   10.40
  20  -5   3   -0.90    6.30
  20  -6  -3    0.90    9.90
  20  -6   3   -0.60    6.40
  20  -7  -3    2.30   10.60
  20  -7   3    4.00    6.60
  20  -8  -3   -0.10   10.70
  20  -8   3   32.50    7.90
  21   5  -3    0.10    8.80
  21   5   3   -4.60    6.20
  21   4  -3    9.60    9.50
  21   4   3    0.20    6.60
  21   3  -3    1.40    8.90
  21   3   3   -7.00    6.10
  21   2  -3   -4.20    8.60
  21   2   3    0.60    6.70
  21   1  -3   11.20   10.10
  21   1   3   10.20    7.40
  21   0  -3    4.00    9.90
  21   0   3    7.80    7.20
  21  -1  -3   11.00   10.00
  21  -1   3    6.30    6.70
  21  -2  -3   -1.00    9.50
  21  -2   3   12.70    7.20
  21  -3  -3   -3.80    9.80
  21  -3   3    2.40    6.60
  21  -4  -3   -2.30    9.90
  21  -4   3    0.90    6.70
  21  -5  -3   13.20   10.90
  21  -5   3    3.20    6.90
   0   0  -4   52.69    9.30
   1   0  -4   -7.40    5.00
   0  -1  -4    4.50    7.00
   0   1  -4   -1.80    5.70
  -1   0  -4   23.50    7.20
   1  -1  -4   92.09   11.70
  -1   1  -4   89.09   12.80
   1   1  -4  100.59   11.80
  -2  -1  -4  148.79   15.90
  -1   2  -4   99.39   13.90
   2   1  -4   88.29   12.00
   0  -2  -4   -2.30    7.50
  -2   0  -4   -4.10    6.40
   2  -1  -4   10.60    6.20
  -2   1  -4   17.80    7.80
  -1  -2  -4   13.60    7.80
  -3  -2  -4    7.10    7.70
  -2   3  -4    8.60    7.70
   3   1  -4  199.38   18.40
  -1   3  -4  261.37   19.90
   1  -3  -4  183.98   19.50
   3   0  -4   10.70    5.80
   0   3  -4   16.80    7.20
   0  -3  -4    1.50    8.40
  -3   0  -4    2.10    7.50
   3  -1  -4  987.40   71.59
   1   3  -4 1077.09   71.39
  -3   1  -4 1143.69   72.59
  -1  -3  -4 1071.99   72.99
   3  -2  -4   15.10    6.40
   2   3  -4   18.40    6.50
  -2  -3  -4   19.10    8.30
  -3   2  -4   10.30    7.50
  -3   3  -4 1306.57   82.99
   3  -3  -4 1288.87   83.29
   3   3  -4 1247.68   81.89
  -3  -3  -4 1270.97   83.89
  -3   3   4 1167.58   81.89
  -3  -3   4 1171.58   81.99
   4   3  -4   23.30    6.00
  -4  -3  -4   13.50    8.20
  -3   4  -4   26.20    8.30
   3  -4  -4    4.10    6.90
  -3   4   4   11.60    6.20
  -4  -3   4   17.20    6.70
  -2   4  -4    0.40    7.20
  -4  -2  -4   20.30    8.50
   4   2  -4   16.50    5.80
  -2   4   4   24.00    6.80
  -1   4  -4   83.89   11.40
   1  -4  -4  101.29   13.10
  -4  -1  -4   69.69   12.70
   4   1  -4   86.79   11.20
  -4  -1   4   81.59   10.80
   4   0  -4    8.50    5.60
  -4   0  -4   11.70    7.70
   0  -4  -4   15.20    9.50
  -4   0   4    0.60    6.30
   1   4  -4   18.80    7.00
  -1  -4  -4   14.40    9.00
   4  -1  -4   26.00    6.80
  -4   1  -4   30.80    8.50
  -4   1   4   11.90    6.00
  -2  -4  -4   -2.10    7.10
   4  -2  -4   -0.40    5.60
   2   4  -4   15.90    5.90
  -4   2   4    3.40    6.00
   4  -3  -4    6.70    6.90
  -4   3  -4    8.40    8.40
   4  -4  -4   -4.50    6.20
   4   4  -4    1.90    4.70
  -4  -4  -4   -4.90    7.00
  -4  -4   4   11.40    5.60
  -4   4   4   -4.30    6.70
   4  -4   4   -1.90    3.40
   5   4  -4   63.29    8.20
  -5  -4  -4   45.40   10.70
   4  -5   4   46.60    6.70
  -5  -4   4   53.29    9.30
  -4   5   4   49.90    9.60
   3  -5  -4   13.50    8.00
  -5  -3  -4   20.00    8.90
   5   3  -4   49.50    7.00
   3  -5   4   24.90    4.60
  -5  -2  -4    1.50    7.60
   2  -5  -4   12.80    7.00
   5   2  -4    1.50    4.80
  -2   5   4   -2.80    6.10
   5   1  -4  310.77   22.30
  -1   5  -4  251.57   21.90
   1  -5  -4  283.17   24.40
  -5  -1  -4  232.38   24.60
  -5  -1   4  311.07   23.30
   5   0  -4   20.60    5.90
   0  -5  -4   13.20    9.60
  -5   0  -4   21.80    9.30
   0   5  -4   31.40    7.30
   0   5   4    8.90    5.50
  -5   0   4   27.20    7.80
   1   5  -4  186.98   16.20
   5  -1  -4  168.88   16.40
  -5   1  -4  199.28   19.40
  -5   1   4  167.98   17.20
   2   5  -4   97.39   11.30
   5  -2  -4  109.39   13.00
  -2  -5  -4  106.19   14.20
   5  -2   4   82.69    9.40
   5  -3  -4   66.19   10.80
   3   5  -4   77.99    9.30
  -3  -5  -4   73.59   12.10
  -3  -5   4   66.79   11.90
   5  -3   4   61.99    7.90
   4   5  -4   16.00    5.40
   5  -4  -4   24.90    8.30
  -5   4   4   19.90    7.10
  -4  -5   4   14.90    6.40
  -5  -5  -4  432.76   34.50
   5  -5  -4  403.86   32.80
   5  -5   4  418.26   29.40
  -5   5   4  472.05   33.20
  -6  -5  -4   26.20   10.20
   5  -6  -4   10.00    7.30
  -6  -5   4    7.60    6.30
  -5   6   4    0.50    7.50
   5  -6   4    7.60    3.00
   4  -6  -4    0.90    6.90
   6   4  -4   18.80    5.80
  -6  -4  -4    7.20    9.40
   4  -6   4   10.80    3.20
  -6  -4   4    4.90    7.90
  -4   6   4   -7.30    6.90
   6   3  -4  150.88   15.00
  -6  -3  -4  162.48   19.00
   3  -6  -4  153.88   17.00
  -6  -3   4  152.88   17.50
   3  -6   4  139.59   11.50
  -6  -2  -4   48.90   10.50
  -6  -1  -4    9.20    8.60
   6   1  -4   -5.10    5.00
   1  -6  -4    2.20    8.00
  -1   6  -4   -7.20    5.50
  -6  -1   4    4.60    6.50
   0   6  -4    3.90    5.60
   0  -6  -4  -10.40    8.20
   6   0  -4   -3.90    4.80
  -6   0   4   -0.80    6.80
   0   6   4    4.80    6.20
   6  -1  -4  103.89   12.20
  -1  -6  -4  108.29   14.80
   1   6  -4  119.29   12.30
  -6   1   4   97.19   14.10
   6  -1   4   84.59    9.90
   1   6   4   80.59   12.10
   2   6  -4    7.50    5.30
  -2  -6  -4   -5.40    7.40
   6  -2  -4    2.30    5.30
  -2  -6   4   -1.70    6.10
  -6   2   4   15.70    7.40
   6  -2   4    4.20    4.00
  -3  -6  -4   26.40    9.20
  -4  -6  -4    9.60    8.50
   6  -4  -4   18.50    7.10
   4   6  -4    2.60    4.70
   6  -4   4   -0.80    3.40
  -6   4   4    2.50    7.50
  -4  -6   4   12.30    7.30
  -5  -6  -4   58.39   12.20
   6  -5  -4  107.09   14.10
   5   6  -4   57.89    8.50
   6  -5   4   57.29    6.90
  -5  -6   4   74.39   10.80
   6   6  -4   17.20    5.10
   6  -6  -4   -0.80    7.50
  -6  -6  -4    3.60    9.10
  -6   6   4   -2.00    7.00
   6  -6   4    2.40    2.90
  -6  -6   4    3.40    6.10
  -7  -6  -4   31.20   11.10
   6  -7  -4   13.50    8.50
   7   6  -4   26.80    6.30
  -7  -6   4   39.30    8.80
   7   5  -4 1117.59   71.99
   5  -7  -4 1097.19   73.89
  -7  -5  -4 1097.39   74.79
   5  -7   4 1026.80   69.59
  -7  -5   4 1045.60   73.79
   4  -7  -4   54.79   10.40
   7   4  -4   61.49    8.80
  -7  -4  -4   62.49   12.80
   4  -7   4   50.29    5.70
  -4   7   4   30.70   10.10
   3  -7  -4  387.46   31.30
   7   3  -4  387.96   29.50
   3  -7   4  376.66   26.10
  -7  -3   4  428.76   32.70
   1  -7  -4  499.55   38.50
   7   1  -4  475.45   36.40
  -7  -1   4  539.25   38.10
   7   1   4  492.05   35.10
   7   0  -4   79.69   10.50
   7   0   4   73.89    9.80
   7  -1  -4  446.26   37.60
  -1  -7  -4  526.35   37.80
  -1  -7  -4  509.25   40.20
  -7   1   4  569.84   39.50
  -1  -7   4  516.35   38.40
   1   7   4  539.25   38.50
   7  -1   4  559.04   36.40
   7  -2  -4    1.80    6.20
  -2  -7  -4    3.70    8.00
   2   7   4    1.60    5.50
  -7   2   4   -7.00    7.10
   7  -2   4    4.20    3.70
  -4  -7  -4   38.90   10.90
   7  -4  -4   57.09    9.50
   4   7  -4   51.99    7.50
  -7   4   4   30.40    8.80
  -4  -7   4   64.79   10.60
   7  -4   4   47.00    6.70
   7  -5  -4   13.50    6.70
   5   7  -4    5.30    4.50
  -5  -7   4    0.40    6.90
   7  -5   4    0.80    3.00
  -7   5   4   12.60    7.50
   7  -6  -4   33.50    9.00
  -6  -7  -4   33.30   10.80
   7  -6   4   33.30    4.90
  -7   6   4   27.80    8.10
  -7  -7  -4  110.09   15.70
   7  -7  -4  106.69   14.30
   7   7  -4   87.89   10.60
  -7  -7   4   95.69   13.90
  -7   7   4   88.39   16.10
   7  -7   4   84.29    7.90
   8   7  -4   14.30    5.30
   7  -8  -4   17.70    8.00
  -8  -7   4   -1.20    5.70
   7  -8   4   -4.80    2.30
   7  -8   4   -8.70    4.10
  -7   8   4    4.30    7.90
   8   7   4   -0.10    4.80
   6  -8  -4   16.40    8.10
   8   6  -4   15.00    5.40
  -6   8   4    8.90    8.10
   5  -8  -4   17.50    8.90
  -8  -5   4   24.00    9.80
  -5   8   4    5.80    7.50
   5  -8   4   18.20    2.80
   8   5   4   24.60    5.90
   8   5   4   19.30    5.50
   5  -8   4   20.60    5.80
   8   4  -4   14.40    6.30
   4  -8  -4    3.20    7.30
   8   4   4    8.00    5.00
  -8  -4   4    5.50    8.40
   4  -8   4   10.50    2.30
  -4   8   4   17.80    8.80
   3  -8  -4   71.79   11.70
   8   3  -4  102.19   12.60
   8   3   4   55.79    8.60
  -8  -3   4   73.19   13.20
   2  -8  -4    2.00    7.80
  -8  -2   4   22.90    9.40
   8   1  -4   22.10    6.80
   1  -8  -4   22.50   11.10
  -1   8   4    3.70    8.00
  -8  -1   4   15.50    8.10
   0  -8   4   55.99    9.80
   0   8   4   29.70   10.10
  -1  -8  -4   78.79   14.80
  -1  -8  -4  127.59   14.70
   8  -1   4  108.89   11.10
  -2  -8  -4    6.00    5.60
   8  -2  -4   -5.10    5.60
  -2  -8  -4   -0.50    8.30
   8  -2   4   16.80    4.40
  -8   2   4   30.80    8.20
  -2  -8   4   11.20    7.00
  -3  -8  -4   14.30    8.90
  -3  -8  -4   14.60    7.10
   8  -3   4   25.50    4.50
  -3  -8   4   18.00    7.70
  -8   3   4   -4.60    7.60
  -4  -8  -4    5.40    8.80
   8  -4  -4   -7.10    5.60
  -4  -8   4    5.20    7.80
  -8   4   4   -3.00    7.20
  -5  -8  -4   15.10    9.20
   8  -5  -4   -2.90    6.10
   5   8  -4   11.70    4.50
   8  -5   4    8.80    3.50
  -8   5   4   -2.10    7.70
   8  -6  -4    2.50    5.60
  -6  -8  -4  -11.30    7.80
   6   8  -4   -3.10    4.60
   8  -6   4    5.90    2.80
  -8   6   4   -5.10    7.50
  -6  -8   4   -0.60    6.90
  -7  -8  -4   -7.10    8.60
   7   8  -4    9.40    4.90
   8  -7  -4   -4.80    5.50
  -8   7   4   -5.90    7.20
  -7  -8   4    1.60    6.30
   8  -7   4   -0.20    2.30
   8  -7   4   -4.80    3.70
   8   8  -4   12.50    5.20
   8  -8  -4   -0.10    7.10
   8  -8   4   -0.90    2.20
   8   8   4   -3.80    5.00
  -8  -8   4   -0.80    5.50
  -8   8   4   -3.40    7.80
   9   8  -4    3.20    4.70
  -9  -8   4    9.00    6.20
  -8   9   4   -3.00    7.80
   9   7  -4   37.40    7.30
   7  -9  -4   20.10    8.90
  -9  -7   4   22.10    8.00
  -7   9   4    1.00    8.10
   9   7   4   28.80    6.80
   7  -9   4   22.00    3.70
   9   6  -4   11.80    5.80
   9   6   4   12.10    5.30
   6  -9   4   -8.80    7.70
  -9  -6   4    9.20    8.00
  -6   9   4   19.80    9.00
   9   5  -4  288.97   22.70
   5  -9  -4  257.07   24.80
   5  -9   4  234.88   22.60
   9   5   4  286.97   22.10
  -9  -5   4  330.27   27.80
  -5   9   4  250.07   25.50
   9   5   4  294.37   22.90
   9   4  -4   10.90    6.50
   4  -9  -4    0.30    7.30
  -4   9   4    2.60    8.30
  -9  -4   4    9.20    8.70
   4  -9   4   -2.80    4.90
   9   4   4    4.90    4.60
   9   4   4   10.90    5.00
   3  -9  -4   72.49   12.60
   9   3   4   75.59    9.70
  -9  -3   4  110.99   15.50
  -3   9   4   59.59   11.80
   2  -9  -4    1.20    8.40
   9   2  -4    1.20    6.30
   9   2   4    0.90    4.20
   2  -9   4   -9.10    6.30
  -9  -2   4   -1.40    8.70
  -2   9   4    3.00    8.10
   2  -9   4  -10.60    6.80
   9   1  -4  297.97   25.50
  -1   9   4  322.27   29.20
   1  -9   4  338.57   29.40
   9   1   4  336.27   23.70
  -9  -1   4  283.57   27.30
   0  -9   4  144.29   20.10
   9  -1  -4  333.37   29.40
  -1  -9  -4  373.66   32.40
  -9   1   4  376.06   31.00
  -1  -9   4  433.06   31.00
   9  -1   4  381.36   27.30
   9  -2  -4   24.80    7.70
  -2  -9  -4   17.40    9.60
  -9   2   4   20.60    8.40
   9  -2   4   26.20    5.40
  -2  -9   4   31.90    8.90
   9  -3  -4  101.79   15.10
  -3  -9  -4  136.59   18.40
   9  -3   4  139.39   11.60
   9  -4  -4   59.09   10.40
   9  -4   4   61.99    7.60
  -4  -9   4   63.29   12.30
   9  -4   4   50.99    8.30
   9  -5  -4  506.55   37.70
  -5  -9  -4  537.35   40.10
  -5  -9   4  553.34   40.00
   9  -5   4  534.05   34.50
  -9   5   4  415.76   38.00
  -6  -9  -4   15.50    9.90
   9  -6  -4   25.90    8.40
  -6  -9   4   36.30   10.00
  -9   6   4    9.10    8.20
   9  -6   4   28.30    4.40
  -7  -9  -4  117.09   16.70
   9  -7  -4  109.79   14.60
  -7  -9   4  106.19   16.60
   9  -7   4  114.89    9.30
  -9   7   4   88.99   15.90
   9  -8  -4    4.70    6.60
  -9   8   4   -1.90    8.10
  -8  -9   4    0.40    5.70
   9  -8   4    2.00    2.50
   8   9   4   -7.60    4.60
   9  -9  -4   -2.30    7.20
   9   9   4   -7.80    4.60
  -9  -9   4   -2.10    5.80
   9  -9   4    0.20    2.50
  -9   9   4  -11.20    7.50
   9 -10  -4   -1.50    8.10
  -9  10   4   10.60    9.50
 -10  -9   4    8.20    6.80
  10   9   4    6.00    5.50
  10   8  -4    7.00    5.30
   8 -10  -4   -4.70    7.40
 -10  -8   4   -4.40    5.90
  -8  10   4   -9.20    7.70
  10   8   4   -0.40    4.90
   7 -10  -4    1.40    7.90
  10   7   4    5.30    5.20
  10   6  -4    9.10    6.50
   6 -10  -4   14.80    8.40
 -10  -6   4   22.20   10.90
  10   6   4   17.90    6.00
  -6  10   4   -1.30    7.90
   5 -10  -4   -2.10    7.30
  10   5  -4    8.00    6.00
 -10  -5   4   22.10    7.90
  10   5   4   -1.80    4.30
  -5  10   4    1.90    8.20
  10   4  -4   -7.30    5.40
   4 -10  -4   -6.90    7.00
 -10  -4   4    5.80    8.20
  -4  10   4    5.60    9.10
  10   4   4   -0.70    4.00
  10   3  -4   -6.70    5.40
   3 -10  -4   10.60    7.60
  10   3   4    2.30    4.00
   3 -10   4   -4.10    5.70
 -10  -3   4  -11.50    8.10
  -3  10   4    7.70    9.00
  10   2  -4   -1.30    5.90
   2 -10  -4   45.00   10.30
   2 -10   4   -3.50    7.50
  -2  10   4   51.39   12.70
 -10  -2   4   17.80    9.70
   1 -10  -4   23.50   10.80
  10   1  -4   13.90    7.20
  10   1   4   21.40    5.40
   1 -10   4   -1.50    7.00
  -1  10   4   11.40    8.80
 -10  -1   4   15.50    9.60
   1 -10   4   20.70   11.20
  10   0  -4    2.30    6.00
   0 -10  -4   18.10    9.60
 -10   0   4   -2.10    8.50
  10   0   4    4.60    4.10
   0 -10   4    6.90    9.70
   0  10   4   11.60    7.90
  -1 -10  -4   12.20    8.80
  -2 -10  -4   -7.00    7.20
  -2 -10   4    3.30    6.60
  10  -2   4    3.10    3.90
 -10   2   4   15.30    8.40
  10  -3  -4   33.80    9.10
  -3 -10  -4   48.80   11.40
  -3 -10   4   46.50   11.10
  10  -3   4   45.90    6.50
  10  -4  -4   -1.60    5.80
  -4 -10  -4   10.50    8.50
 -10   4   4   -3.00    7.50
  10  -4   4    4.50    3.60
  -4 -10   4    3.00    8.10
  -5 -10  -4   10.50    8.90
  10  -5  -4   -5.30    6.20
 -10   5   4    4.10    7.70
  10  -5   4    8.20    3.50
  -5 -10   4   12.20    9.40
  -6 -10  -4   -0.80    9.00
  10  -6  -4   -8.70    6.30
  10  -6   4    1.50    2.90
  -6 -10   4   -3.10    7.40
 -10   6   4   -2.00    7.50
  -7 -10  -4   17.80   10.10
  10  -7  -4    2.70    7.40
  10  -7   4    8.20    3.30
 -10   7   4    4.30    8.00
  -7 -10   4   12.70    8.40
  10  -8  -4    5.00    7.60
  10  -8   4    5.20    3.00
  -8 -10   4   10.80    8.00
   8  10   4    7.40    6.10
 -10   8   4   -5.10    8.20
  10  -9  -4   -6.20    7.00
   9  10   4   -5.10    5.10
  -9 -10   4    5.10    6.40
  10  -9   4   -1.30    2.50
 -10   9   4  -14.10    8.00
  10 -10  -4    2.50    7.70
 -10 -10   4    1.40    6.10
  10  10   4    6.50    6.20
 -10  10   4   -6.10    8.60
  10 -11  -4    8.40    9.00
 -10  11   4   -0.80    9.30
 -11 -10   4    4.70    7.70
  11  10   4    8.50    5.90
   9 -11  -4   24.40    9.50
 -11  -9   4   21.00    8.50
  11   9   4   29.90    7.20
   8 -11  -4   10.00    8.50
  11   8  -4    8.70    6.50
  -8  11   4    4.00    9.60
 -11  -8   4    7.00    7.90
  11   8   4    8.40    5.60
  11   7  -4   88.79   13.40
   7 -11  -4  123.79   17.30
 -11  -7   4  112.49   20.80
  11   7   4  132.59   13.10
  11   6  -4   23.30    8.00
   6 -11  -4   20.00    9.40
  -6  11   4   11.50    9.60
 -11  -6   4   42.00   10.70
  11   6   4   34.90    6.80
  11   5  -4  117.29   14.80
   5 -11  -4  114.39   16.00
  11   5   4  116.89   12.70
 -11  -5   4  122.39   18.70
  11   4  -4   -2.60    6.10
   4 -11  -4    6.40    8.10
  11   4   4    5.80    4.90
  -4  11   4    5.00    9.40
  11   3  -4   -4.90    6.40
   3 -11  -4   -9.30    7.40
 -11  -3   4   -6.20    8.60
  11   3   4    5.60    4.50
  -3  11   4   -1.20    9.40
   3 -11   4   10.60    6.80
  11   2  -4   14.50    7.60
   2 -11  -4   13.60    9.70
  11   2   4   15.50    5.00
  -2  11   4   30.70   10.30
 -11  -2   4    4.40    8.40
   2 -11   4   16.00    8.40
   1 -11  -4   19.00    9.50
  11   1  -4   -7.80    5.60
  -1  11   4   18.00    8.30
   1 -11   4   -2.90    9.20
 -11  -1   4    1.80    8.60
  11   1   4    1.90    4.00
  11   0  -4    6.20    7.10
   0 -11  -4   22.20    8.70
  11   0   4    7.20    4.30
   0  11   4   -0.30    6.30
   0 -11   4    6.40   10.80
 -11   0   4    2.00    7.90
  -1 -11  -4    0.20    7.60
  11  -1  -4   -5.80    6.00
 -11   1   4    3.20    7.60
   1  11   4   22.80    8.70
  -1 -11   4    0.40    7.70
  11  -1   4   -5.90    3.60
  11  -2  -4   -4.10    5.90
  -2 -11  -4   -6.50    7.20
  11  -2   4   -3.40    3.50
 -11   2   4   -7.70    7.20
  -2 -11   4   -2.40    6.40
  11  -3  -4   23.40    8.50
  -3 -11  -4   55.99   11.70
  -3 -11   4   30.80    9.80
  11  -3   4   36.20    6.00
  11  -4  -4   -7.80    6.60
  -4 -11  -4   39.00   10.70
  11  -4   4    4.70    3.70
  -4 -11   4   -2.40    8.60
 -11   4   4   -4.00    7.80
  -5 -11  -4  305.77   28.40
  11  -5  -4  283.57   25.80
  11  -5   4  326.37   22.10
  -5 -11   4  289.17   29.40
  -6 -11  -4   10.30   10.00
  11  -6  -4    2.20    6.80
  -6 -11   4    1.20    8.00
 -11   6   4   12.50    8.50
  11  -6   4    4.10    3.40
  -7 -11  -4  117.19   17.50
  11  -7  -4   99.59   15.50
  -7 -11   4  149.09   19.50
  11  -7   4  109.39   10.30
  11  -8  -4   20.40    9.20
  -8 -11   4   34.60   10.50
   8  11   4   21.90    7.50
  11  -8   4   19.50    4.20
 -11   8   4    9.20    9.10
  11  -9  -4   36.60   10.00
  -9 -11   4   50.99   12.00
   9  11   4   47.70    9.30
  11  -9   4   42.00    5.60
  11 -10  -4    4.70    8.30
 -10 -11   4    8.60    7.00
  10  11   4   21.50    7.30
 -11  10   4   -4.90    8.70
  11 -11  -4  162.68   20.90
  11  11   4  172.98   17.30
  11 -12  -4    7.10   10.00
  12  11   4    5.60    6.10
  10 -12  -4   -7.00    8.70
 -12 -10   4    9.70    8.60
 -10  12   4   -0.50   10.50
  12  10   4   12.20    6.60
   9 -12  -4    1.60    8.90
  12   9   4   15.50    6.50
 -12  -9   4    6.00    8.50
  -9  12   4   -1.70    8.80
   8 -12  -4   -6.00    8.00
  12   8  -4   -9.00    5.40
  -8  12   4    4.70    9.60
 -12  -8   4    6.80   10.30
  12   8   4   22.50    6.70
  12   7  -4    0.40    6.60
   7 -12  -4   10.00    9.00
 -12  -7   4   10.10    9.10
  -7  12   4    4.20   10.50
  12   7   4   11.30    5.80
   6 -12  -4    5.00    8.40
  12   6  -4   12.90    7.10
  12   6   4    5.20    5.50
 -12  -6   4    7.50    8.30
  -6  12   4   33.10   12.60
   5 -12  -4   19.20    9.10
  12   5  -4    8.90    7.90
  -5  12   4    0.10   10.60
  12   5   4   29.80    6.60
  12   4  -4   -0.70    6.90
   4 -12  -4    8.40    8.10
 -12  -4   4    4.20    9.60
  12   4   4   10.30    5.00
  -4  12   4   12.50   11.40
  12   3  -4   -2.90    6.70
   3 -12  -4    0.50    8.50
 -12  -3   4  -11.30    8.60
  12   3   4    5.20    4.30
   3 -12   4    2.70    6.20
  -3  12   4   -4.30   10.80
  12   2  -4    5.30    6.50
   2 -12  -4   -3.00    8.60
  12   2   4   -0.90    4.00
   2 -12   4   -4.90    6.30
 -12  -2   4  -15.70    7.90
  -2  12   4   -1.40    7.70
  12   1  -4   -2.10    6.20
   1 -12  -4   16.40    9.60
  12   1   4    4.20    4.30
   1 -12   4   -5.10    9.20
  -1  12   4    4.40    7.30
 -12  -1   4   -2.20    8.60
   0 -12  -4   10.10    8.90
  12   0  -4   -2.10    6.20
   0  12   4   34.10    9.60
  12   0   4   -2.80    3.70
 -12   0   4    0.50    8.00
   0 -12   4    0.50   10.40
  12  -1  -4   -7.10    6.30
  -1 -12  -4   42.60   10.40
  -1 -12   4   14.70    8.80
   1  12   4   15.70    8.20
  12  -2  -4  -14.30    6.10
  -2 -12  -4    0.60    8.90
 -12   2   4    0.70    8.00
  12  -2   4   -9.10    3.80
  -2 -12   4    7.40    7.10
  12  -3  -4  -10.00    6.20
  -3 -12  -4    1.80    9.20
  -3 -12   4   -1.40    7.60
  12  -3   4    1.50    3.90
 -12   3   4   -7.20    8.10
  12  -4  -4   -4.10    6.70
  -4 -12  -4  -12.60    8.80
  -4 -12   4  -10.50    8.10
 -12   4   4   -9.50    7.90
  12  -4   4   -2.90    3.40
  12  -5  -4   -7.00    6.70
  -5 -12  -4   -5.30    9.50
  -5 -12   4    0.30    8.30
 -12   5   4   -6.80    8.00
  12  -5   4   -2.90    3.40
  -6 -12  -4   -0.40   10.00
  12  -6  -4    2.20    7.40
 -12   6   4   13.00    8.90
  -6 -12   4    3.30   10.10
  12  -6   4    0.70    3.50
  12  -7  -4   17.50    9.00
  -7 -12  -4   13.90   10.70
 -12   7   4   -0.10    8.30
  -7 -12   4    4.50    8.70
  12  -7   4    0.30    3.30
  12  -8  -4   11.30    8.50
 -12   8   4    0.00    8.60
   8  12   4   -7.10    5.60
  12  -8   4   -0.10    3.20
  -8 -12   4   -0.30    7.70
  12  -9  -4   -3.60    7.50
 -12   9   4   -3.70    9.50
  12  -9   4   -0.60    3.30
   9  12   4   -2.80    6.00
  12 -10  -4    0.50    8.30
 -12  10   4   -7.30    9.40
  10  12   4   -5.80    5.50
  12 -11  -4    2.90    8.60
  11  12   4    9.30    6.50
  12 -12  -4    1.60    9.10
  12  12   4    0.70    6.20
  12 -13  -4   -2.70    9.40
  13  12   4   -7.50    5.50
  11 -13  -4    6.40    9.40
  13  11   4    6.40    6.60
  10 -13  -4   -2.70    8.80
  13  10   4    1.60    6.00
   9 -13  -4    9.00   10.40
  -9  13   4   -2.60    9.80
  13   9   4    2.00    5.90
 -13  -9   4   17.50   13.20
   8 -13  -4  -12.20    8.30
  13   8  -4   -8.50    4.70
  -8  13   4   -5.60   11.70
 -13  -8   4    0.70   10.60
  13   8   4    4.90    5.80
   7 -13  -4  187.18   21.90
  13   7   4  196.68   17.60
 -13  -7   4  210.48   23.50
  -7  13   4  158.58   26.10
  13   6  -4   -2.70    5.50
   6 -13  -4    0.30    8.00
  -6  13   4   -5.40   12.00
  13   6   4    7.70    5.30
 -13  -6   4    6.80    9.80
  13   5  -4  232.58   23.00
   5 -13  -4  271.37   25.90
  13   5   4  289.07   22.00
 -13  -5   4  289.17   29.40
  -5  13   4  258.37   31.60
   4 -13  -4   -2.80    8.20
  13   4  -4    1.40    7.40
 -13  -4   4  -12.50    9.20
   4 -13   4    0.90    8.40
  -4  13   4   -2.20   11.70
  13   4   4    6.30    5.00
  13   3  -4   -4.30    6.40
   3 -13  -4  -11.00    8.40
   3 -13   4    1.80    7.50
 -13  -3   4   -8.20    8.80
  13   3   4   -0.80    4.50
  13   2  -4   -2.00    6.60
   2 -13  -4    1.10    8.80
  -2  13   4   -2.50    8.30
 -13  -2   4   -5.50    9.30
  13   2   4    1.60    4.70
   2 -13   4    2.10    7.60
   1 -13  -4  162.58   20.90
  13   1  -4  137.49   18.00
  -1  13   4  218.08   23.10
   1 -13   4  171.98   24.80
  13   1   4  168.38   15.00
 -13  -1   4  133.49   20.70
  13   0  -4   -7.00    7.40
   0 -13  -4   10.50    9.30
   0  13   4   11.70    8.50
   0 -13   4    8.80   12.20
  13   0   4    6.70    5.10
 -13   0   4    5.00    8.60
  13  -1  -4   45.00   11.00
  -1 -13  -4   57.89   13.00
  13  -1   4   47.10    7.60
 -13   1   4   29.80    9.40
   1  13   4   64.29   14.40
  13  -2  -4   -9.90    6.90
  -2 -13  -4    3.00    9.30
 -13   2   4    1.00    8.20
  13  -2   4    0.10    4.30
  -2 -13   4    4.50    8.10
  -3 -13  -4   11.80   10.50
  13  -3  -4   12.60    8.90
 -13   3   4   -6.20    8.90
  13  -3   4   18.50    5.30
  -3 -13   4   34.10    9.70
  13  -4  -4   19.30    8.90
  -4 -13  -4   22.20   11.60
  13  -4   4   26.80    5.60
  -4 -13   4   44.30   12.60
  -5 -13  -4   20.90   12.40
  13  -5  -4   47.90   11.00
  13  -5   4   44.20    6.70
  -5 -13   4   64.89   14.40
  13  -6  -4   28.90    9.60
  -6 -13  -4   13.90   11.10
  13  -6   4   17.80    4.80
 -13   6   4    5.20    9.00
  -6 -13   4   14.20   12.10
  13  -7  -4    8.00    8.50
  -7 -13  -4   11.80   10.80
  13  -7   4   11.90    4.30
 -13   7   4    0.20    8.80
  13  -8  -4   20.30    9.80
  13  -8   4    4.60    3.70
   8  13   4    4.80    6.70
 -13   8   4   -1.10    9.10
  13  -9  -4    3.70    8.90
  13  -9   4    9.30    4.30
 -13   9   4   -1.40   14.30
   9  13   4   15.90    7.40
  13 -10  -4   21.40    9.10
  10  13   4    3.80    6.60
  13 -11  -4  -11.20    8.30
  11  13   4    8.10    6.60
  13 -12  -4   -8.50    8.70
  12  13   4    6.60    6.50
  13 -13  -4   -6.30    9.70
  13  13   4    3.80    6.60
  13 -14  -4    2.90   10.10
  14  13   4    2.80    6.60
  12 -14  -4    0.90    9.30
  14  12   4   -5.50    5.60
  11 -14  -4    5.20   10.10
  14  11   4   -0.50    6.20
  10 -14  -4   -1.90    8.90
  14  10   4   -1.30    5.60
   9 -14  -4  -13.00    8.40
  14   9   4   -4.20    5.30
  14   8  -4    0.90    5.80
   8 -14  -4   -8.40    8.60
  -8  14   4   -4.80   12.00
 -14  -8   4    4.30    9.60
  14   8   4    4.30    5.70
   7 -14  -4    1.60    8.60
  14   7  -4   -2.70    5.70
 -14  -7   4    7.40    9.70
  -7  14   4  -14.40   12.70
  14   7   4   -5.00    5.10
  14   6  -4   24.20    7.80
   6 -14  -4   -9.30    8.00
 -14  -6   4    2.80    9.70
  14   6   4    5.00    5.40
  -6  14   4   -5.00   13.80
  14   5  -4    1.40    6.50
   5 -14  -4    2.00    8.60
 -14  -5   4   10.70   10.90
  14   5   4   -1.00    5.00
  -5  14   4   -1.50   13.10
  14   4  -4   -4.00    6.10
   4 -14  -4   11.20    9.70
 -14  -4   4    1.80   10.70
  -4  14   4   32.30   15.40
  14   4   4    6.80    5.20
   3 -14  -4    6.50    9.40
  14   3  -4    3.50    7.00
 -14  -3   4  -12.20    8.70
  14   3   4    3.90    5.00
  -3  14   4   -3.20    9.80
   2 -14  -4   -2.60    8.80
  14   2  -4  -10.90    6.20
  14   2   4   -1.80    4.70
 -14  -2   4  -18.50    8.70
  -2  14   4    1.90    9.10
   1 -14  -4    3.10    8.70
  14   1  -4    3.20    7.80
  -1  14   4    3.50    7.10
 -14  -1   4   -0.40    9.50
  14   1   4    1.40    4.90
  14   0  -4   -5.70    7.40
   0 -14  -4   22.70   10.00
  14   0   4    0.40    4.70
   0  14   4    0.80    8.90
 -14   0   4    0.00    8.80
  -1 -14  -4   24.20    9.80
  14  -1  -4  -15.40    7.00
  14  -1   4    0.80    4.90
 -14   1   4    0.60    8.40
  14  -3  -4    3.20    8.20
  -3 -14  -4    8.00   10.00
  14  -4  -4    3.90    8.10
  -4 -14  -4   -0.80    9.70
  14  -4   4    5.30    4.50
 -14   4   4    0.90    8.80
  -5 -14  -4   11.20   11.10
  14  -5  -4    0.00    7.90
  14  -5   4    3.80    4.30
 -14   5   4   -0.10    8.80
  -6 -14  -4   -2.40   10.70
  14  -6  -4   -5.70    7.50
 -14   6   4   -5.00    9.20
  14  -6   4   -0.70    3.80
  14  -7  -4   -2.90    8.20
  14  -7   4   -1.50    3.70
 -14   7   4   -7.10   10.30
  14  -8  -4   -2.00    8.40
  14  -8   4    2.10    3.90
   8  14   4    7.30    6.50
  14  -9  -4   -6.30    8.60
   9  14   4    6.70    6.60
  14  -9   4    0.70    4.20
  14 -10  -4   -3.40    9.10
  10  14   4    3.00    6.70
  14 -11  -4  -11.00    8.70
  11  14   4    2.30    6.40
  14 -12  -4   -9.60    8.70
  12  14   4    2.10    6.50
  14 -13  -4  -17.30    8.60
  13  14   4    6.00    7.20
  14 -14  -4   -6.80   10.00
  14  14   4   -0.80    6.80
  14 -15  -4   -2.30   10.30
  15  14   4   -0.80    6.50
  13 -15  -4   27.50   12.30
  12 -15  -4    8.60   10.90
  15  12   4   11.70    7.10
  11 -15  -4   50.29   13.30
  15  11   4   48.70    9.70
  10 -15  -4    4.20    9.50
  15  10   4    0.30    5.90
   9 -15  -4   12.10   10.20
  15   9   4    5.70    6.30
   8 -15  -4   22.50   10.60
  15   8  -4    2.00    7.10
  15   8   4   14.50    6.60
   7 -15  -4   31.20   10.90
  15   7  -4    8.50    7.60
  15   7   4   13.80    6.30
  -7  15   4    0.60   16.30
   6 -15  -4   -8.90    8.30
  15   6  -4   -4.60    6.20
 -15  -6   4    6.80   11.40
  -6  15   4   -8.70   14.30
  15   6   4   -5.10    5.10
  15   5  -4   16.70    7.90
   5 -15  -4   12.30   10.00
  -5  15   4    1.30   14.30
 -15  -5   4    1.80   10.90
  15   5   4   16.60    6.50
   4 -15  -4    2.10    9.10
  15   4  -4    0.40    6.90
  -4  15   4    8.30   10.30
  15   4   4   -3.10    5.10
 -15  -4   4   -7.70   10.10
   3 -15  -4   -5.10    9.00
  15   3  -4   -6.40    6.60
 -15  -3   4  -10.30    9.60
  -3  15   4   11.50   10.90
  15   3   4   -1.50    5.20
   2 -15  -4   -2.10    9.20
  15   2  -4   -1.30    7.30
  15   2   4   -3.70    4.90
  -2  15   4   -1.90    8.90
 -15  -2   4   -5.60    9.90
   1 -15  -4  102.09   17.10
  15   1  -4  121.99   16.40
  15   1   4  100.39   12.60
   0 -15  -4    0.90    9.10
  15   0  -4   -3.40    7.60
   0  15   4    4.60   11.00
 -15   0   4   -3.50    8.80
  15   0   4    1.60    5.00
  15  -1  -4   38.10   10.70
  -1 -15  -4   49.99   13.10
 -15   1   4   20.60   10.10
  15  -1   4   38.50    7.40
  15  -2  -4  -11.80    7.20
  -2 -15  -4   -4.00    9.90
  15  -2   4   -8.60    4.30
 -15   2   4   -0.60    9.50
  15  -3  -4  105.69   15.70
  -3 -15  -4  112.59   18.00
  15  -3   4  109.89   12.40
  -4 -15  -4   24.20   11.30
  15  -4  -4   28.90   10.30
  15  -4   4   34.40    6.70
  15  -5  -4  324.47   29.30
  -5 -15  -4  323.57   31.30
  15  -5   4  323.67   24.20
  -6 -15  -4    3.80   10.80
  15  -6  -4    4.00    8.80
  15  -6   4    0.60    4.20
  15  -7  -4   22.70   10.80
  15  -7   4   22.80    5.80
  15  -8  -4   12.30    9.50
  15  -8   4   10.90    4.80
   8  15   4   14.30    7.60
  15  -9  -4   51.79   13.50
   9  15   4   64.99   11.50
  15  -9   4   64.79   11.50
  15 -10  -4   -4.10    9.10
  10  15   4    3.80    7.00
  15 -11  -4   25.30   11.80
  11  15   4   17.60    8.10
  15 -12  -4   -0.60    9.80
  12  15   4    8.00    7.10
  15 -13  -4    4.00   10.90
  13  15   4    2.30    7.10
  15 -14  -4   -2.30   10.50
  14  15   4   -5.80    6.50
  13 -16  -4   -0.20   10.50
  16  13   4    1.80    6.70
  12 -16  -4    2.60   10.90
  16  12   4   -1.40    6.40
  11 -16  -4   -2.50   10.30
  16  11   4   -1.80    6.20
  10 -16  -4    9.00   10.70
  16  10   4    2.20    6.30
   9 -16  -4    3.70    9.80
  16   9   4    7.20    6.50
  16   8  -4   -0.50    7.10
   8 -16  -4    0.70    9.20
  16   8   4    0.00    6.30
  16   7  -4   10.30    8.60
   7 -16  -4   26.00   11.30
  16   7   4   17.50    7.10
  16   6  -4  -13.50    6.80
   6 -16  -4    3.40    9.30
  16   6   4   -1.00    5.60
   5 -16  -4   -6.40    8.70
  16   5  -4    1.20    7.60
  16   5   4   -5.10    5.00
  16   4  -4    3.40    7.10
   4 -16  -4    1.90    9.30
  16   4   4    0.30    5.20
  -4  16   4   20.80   17.90
   3 -16  -4   10.30   10.30
  16   3  -4   20.10    8.80
  16   3   4    8.90    6.10
  16   2  -4  -11.80    6.80
   2 -16  -4  -17.30    8.10
  -2  16   4   -1.30   10.40
  16   2   4   -4.80    4.90
  16   1  -4   -5.80    7.80
   1 -16  -4   -5.50    9.20
  16   1   4   -3.70    4.80
  16   0  -4    6.40    8.40
   0 -16  -4   -5.60    9.40
  16   0   4   -3.40    5.10
  -1 -16  -4   -2.50    9.60
  16  -1  -4   -4.70    8.30
  16  -1   4    2.90    5.30
  16  -2  -4    5.90    8.70
  -2 -16  -4   -0.10   10.60
  16  -2   4    1.70    5.10
  16  -3  -4    0.80    8.20
  -3 -16  -4    1.70   10.50
  16  -3   4   -2.00    5.20
  -4 -16  -4    0.20   10.40
  16  -4  -4    1.40    8.90
  16  -4   4   -1.10    5.20
  16  -5  -4   -7.30    8.30
  -5 -16  -4    5.30   10.70
  16  -5   4   -0.20    4.80
  16  -6  -4   13.00    9.80
  -6 -16  -4   39.10   12.50
  16  -6   4   -0.30    4.50
  16  -7  -4   -3.40    8.90
   7  16   4   11.10    7.10
  16  -7   4   -0.80    4.60
  16  -8  -4    0.80    9.10
   8  16   4    9.80    7.10
  16  -8   4    6.90    4.90
  16  -9  -4   -5.90    9.40
   9  16   4   15.10    7.90
  16 -10  -4   -3.00    9.60
  10  16   4   -3.70    7.00
  16 -11  -4   -6.90   10.20
  11  16   4   -7.50    6.70
  16 -12  -4   -5.40    9.90
  12  16   4   -4.40    7.00
  16 -13  -4   -6.60    9.80
  13  16   4    0.60    7.00
  12 -17  -4    0.40   10.70
  11 -17  -4   29.90   12.60
  17  11   4   15.60    7.80
  10 -17  -4    2.40   10.50
  17  10   4    4.60    6.60
   9 -17  -4   53.19   14.60
  17   9   4   53.79   10.40
  17   8  -4   22.50    9.10
   8 -17  -4   27.90   12.10
  17   8   4   22.40    7.70
   7 -17  -4  218.68   25.40
  17   7  -4  182.58   22.10
  17   7   4  248.68   20.70
   6 -17  -4    7.10   10.00
  17   6  -4   -5.20    7.40
  17   6   4   -1.10    5.90
  17   5  -4    2.40    7.70
   5 -17  -4   -0.70    9.90
  17   5   4    6.80    6.30
  17   4  -4    3.60    7.70
   4 -17  -4    4.40   10.70
  17   4   4   10.20    6.40
  17   3  -4   55.69   12.10
   3 -17  -4   46.50   13.90
  17   3   4   55.59    9.50
   2 -17  -4   -2.70   10.50
  17   2  -4    8.60    8.40
  17   2   4    0.50    5.50
   1 -17  -4   -8.80   10.10
  17   1  -4   -1.60    8.00
  17   1   4   -1.00    5.30
   0 -17  -4    2.60   10.90
  17   0  -4   -3.10    7.90
  17   0   4   -1.20    5.10
  -1 -17  -4  -18.70   10.30
  17  -1  -4    0.50    8.30
  17  -1   4    5.10    5.70
  -2 -17  -4  -14.80   10.00
  17  -2  -4    2.70    9.40
  17  -2   4   -1.60    5.30
  17  -3  -4    5.30    9.30
  -3 -17  -4    1.90   11.80
  17  -3   4   19.60    6.60
  -4 -17  -4    0.60   11.90
  17  -4  -4   -4.00    8.70
  17  -4   4    0.30    4.90
  17  -5  -4   39.80   11.80
  -5 -17  -4   30.90   13.30
  17  -5   4   30.60    7.00
  17  -6  -4   -0.50    9.70
  17  -6   4   -2.10    4.60
  17  -7  -4   -0.40    9.60
   7  17   4    9.20    7.50
  17  -7   4    1.30    4.80
  17  -8  -4    0.40    9.80
   8  17   4    7.30    7.40
  17  -8   4    0.50    5.20
  17  -9  -4   56.09   15.30
   9  17   4   79.59   12.70
  17 -10  -4    5.40   10.90
  10  17   4    3.40    7.60
  17 -11  -4   21.30   12.50
  11  17   4   30.80    9.40
  17 -12  -4   -0.30   10.80
  10 -18  -4    1.70   10.60
  18  10   4   -0.20    6.60
   9 -18  -4    4.40   11.00
  18   9   4   -1.50    6.50
   8 -18  -4    9.20   11.10
  18   8  -4    6.80    9.00
  18   8   4   -2.80    6.20
  18   7  -4   16.40    9.10
   7 -18  -4   -8.30   10.20
  18   7   4    2.70    6.60
  18   6  -4   -6.20    7.90
   6 -18  -4   -1.30   10.40
  18   6   4   10.50    6.90
  18   5  -4    2.60    8.10
   5 -18  -4   10.30   11.00
  18   5   4    3.40    6.20
   4 -18  -4   -7.10    9.90
  18   4  -4    4.70    8.30
  18   4   4    2.30    5.90
  18   3  -4    1.70    8.40
   3 -18  -4    9.40   10.60
  18   3   4    4.00    6.00
   2 -18  -4    4.00   10.40
  18   2  -4   -2.60    8.10
  18   2   4    2.10    5.70
   1 -18  -4    5.20   10.80
  18   1  -4    1.00    8.60
  18   1   4    5.80    6.00
   0 -18  -4    3.70   10.90
  18   0  -4   -5.30    8.50
  18   0   4    0.20    5.80
  -1 -18  -4   -7.20   10.90
  18  -1  -4    7.40    8.90
  18  -1   4   -1.80    5.50
  18  -2  -4  -13.40    8.10
  -2 -18  -4   11.10   11.90
  18  -2   4    1.40    5.70
  -3 -18  -4   14.70   12.00
  18  -3  -4    1.10    9.20
  18  -3   4    4.60    5.90
  18  -4  -4  -11.70    9.60
  -4 -18  -4  -18.80   10.90
  18  -4   4   -6.40    5.40
  18  -5  -4    0.50    9.90
  -5 -18  -4   -7.20   12.10
  18  -5   4    4.70    5.50
  18  -6  -4    2.20   10.20
  18  -6   4    2.40    5.50
  18  -7  -4   19.80   11.60
   7  18   4   27.80    8.80
  18  -7   4    7.00    5.60
  18  -8  -4  -13.80    9.50
   8  18   4   -0.80    7.40
  18  -8   4   -7.10    5.10
  18  -9  -4    4.60   11.10
   9  18   4    5.10    7.80
  18 -10  -4    1.10   10.50
  10  18   4    1.90    7.50
   8 -19  -4    8.90   11.80
  19   8   4   -3.00    6.00
   7 -19  -4   41.00   14.40
  19   7  -4   90.09   13.80
  19   7   4   38.60    9.40
   6 -19  -4  -15.80    9.20
  19   6  -4   -5.90    8.00
  19   6   4   -6.40    5.90
   5 -19  -4   -1.70   10.40
  19   5  -4    4.80    9.00
  19   5   4   15.00    7.00
   4 -19  -4   14.70   11.50
  19   4  -4    6.70    9.90
  19   4   4   16.50    7.20
   3 -19  -4  104.69   18.10
  19   3  -4   96.99   16.40
  19   2  -4    5.20    9.10
   2 -19  -4   15.20   11.40
  19   2   4   16.50    7.40
  19   1  -4   47.50   13.00
   1 -19  -4   70.99   15.90
  19   1   4   67.69   10.70
   0 -19  -4    8.80   12.80
  19   0  -4  -16.40    8.10
  19   0   4    1.30    6.20
  -1 -19  -4   33.50   13.70
  19  -1  -4   11.50   10.40
  19  -1   4   27.40    7.90
  -2 -19  -4   28.90   13.30
  19  -2  -4    6.40   10.40
  19  -2   4   16.80    7.10
  19  -3  -4   78.89   15.50
  -3 -19  -4   77.09   17.30
  19  -3   4   80.29   11.20
  -4 -19  -4    7.40   12.10
  19  -4  -4    7.50   11.00
  19  -4   4    8.70    6.30
  -5 -19  -4   -8.40   11.90
  19  -5  -4   23.20   11.80
  19  -5   4   11.00    6.60
  19  -6  -4   -2.10    9.90
   6  19   4   12.60    7.90
  19  -6   4    0.40    5.60
  19  -7  -4   -1.40   10.00
   7  19   4    7.30    7.80
  19  -7   4    3.20    5.80
  19  -8  -4   -4.80   10.20
   8  19   4   -0.50    7.50
  19  -8   4    3.10    6.20
   5 -20  -4   12.30   13.30
  20   5  -4    1.20    8.50
  20   5   4    2.00    6.60
  20   4  -4   -6.10    8.10
   4 -20  -4   14.40   13.20
  20   4   4   -2.30    6.40
   3 -20  -4    8.20   11.70
  20   3  -4   -3.70    8.90
  20   3   4    3.60    6.80
  20   2  -4   -0.80    9.40
   2 -20  -4   -8.20   11.10
  20   2   4   -7.50    6.30
  20   1  -4    8.80   10.30
   1 -20  -4   -2.80   12.20
  20   1   4    8.20    7.30
   0 -20  -4    4.90   12.70
  20   0  -4    4.00    9.80
  20   0   4    8.10    6.50
  20  -1  -4  -10.80    8.90
  -1 -20  -4    3.50   12.20
  20  -1   4   -4.40    5.90
  -2 -20  -4    6.90   13.30
  20  -2  -4    2.10    9.50
  20  -2   4    1.20    6.40
  20  -3  -4   -5.40    9.20
  -3 -20  -4    5.30   13.80
  20  -3   4    5.30    6.30
  -4 -20  -4   25.40   14.70
  20  -4  -4    6.90   10.70
  20  -4   4   -3.50    5.80
  20  -5  -4   14.60   11.00
  20  -5   4   -4.00    5.70
   0   0  -5   10.90    8.80
   0   1  -5   73.39   12.40
   1   0  -5   59.59   12.10
   0  -1  -5   56.69   12.00
  -1   0  -5   50.09   12.40
  -1   1  -5  133.59   18.30
  -1  -1  -5  151.48   18.80
   1   1  -5  140.89   17.30
   1  -1  -5  145.09   18.90
  -1   2  -5   50.09   11.40
   1  -2  -5   82.89   13.50
   2   1  -5   43.20   10.50
   0   2  -5   17.90    9.30
   0  -2  -5   -6.20    8.90
  -2   0  -5   -9.20    8.60
   2  -1  -5   22.90    9.10
  -2   1  -5   19.40    9.60
  -1  -2  -5   13.50    9.70
   2  -2  -5  195.78   21.00
   2   2  -5  221.38   20.70
  -2   2  -5  183.08   21.10
  -2  -2  -5  223.38   22.50
  -2   3  -5   90.29   13.90
  -3  -2  -5   97.39   14.60
   2  -3  -5   93.19   14.30
   3   2  -5   83.39   12.40
   1  -3  -5   80.79   14.30
  -1   3  -5   62.19   11.50
  -3  -1  -5   48.30   11.80
   3   1  -5   54.09   10.30
   0   3  -5  164.88   18.50
   3   0  -5  122.79   16.80
   0  -3  -5  153.68   18.80
  -3   0  -5  157.88   19.70
   3  -1  -5   -5.50    6.70
   1   3  -5    2.40    7.40
  -3   1  -5   -6.60    8.90
  -1  -3  -5   35.10    9.70
  -3   2  -5   22.30   10.10
   3  -2  -5   25.80    9.50
   2   3  -5   14.70    8.20
  -2  -3  -5   14.50    9.30
  -3  -3  -5    4.20    8.20
  -3   3  -5   11.00    8.80
   3  -3  -5   -3.50    7.40
   3   3  -5    1.50    7.30
   4   3  -5   62.39   11.10
  -3   4  -5   69.89   12.90
  -4  -3  -5   98.79   14.50
   4   2  -5  109.69   15.30
   2  -4  -5  107.59   15.70
  -4  -2  -5  131.39   16.60
  -2   4  -5  121.19   16.50
  -4  -2   5  100.79   13.90
   4   1  -5   12.60    7.40
  -1   4  -5   16.30    8.80
  -4  -1  -5    3.00    9.20
   1  -4  -5   42.30   12.00
   0   4  -5    6.10    8.40
  -4   0  -5   31.40   10.10
   4   0  -5    4.90    7.10
   0  -4  -5   -2.90    9.70
  -4   0   5    5.80    6.30
  -4   1  -5   14.90    9.20
  -1  -4  -5  -12.90    8.70
   4  -1  -5    7.40    7.40
  -4   1   5   -7.40    5.80
  -4   2  -5  217.28   20.90
  -2  -4  -5  164.28   20.60
   2   4  -5  202.48   19.00
   4  -2  -5  160.78   19.30
   4  -3  -5   20.20    8.90
  -3  -4  -5    4.00    8.70
  -4   3  -5   33.50   10.90
   3   4  -5    9.50    7.50
  -4   3   5   -5.00    6.00
   4   4  -5   34.50    8.90
   4  -4  -5   22.70    9.50
  -4  -4  -5   42.90   11.60
  -5  -4  -5   42.30   11.90
   4  -5  -5   51.99   10.70
   4  -5   5   60.69    7.80
   3  -5  -5   65.29   12.60
  -3   5  -5   98.49   14.00
   5   3  -5  123.79   14.10
  -5  -3  -5   84.69   14.80
  -5  -2  -5   23.20   10.20
  -2   5  -5   16.80    9.10
   2  -5  -5   10.60    8.80
   5   2  -5   26.70    7.80
  -5  -2   5    4.80    6.90
   5   1  -5   82.99   12.10
  -5  -1  -5   93.49   15.10
   1  -5  -5   97.09   15.90
  -1   5  -5   82.39   12.90
   0   5  -5   69.79   11.60
   0  -5  -5   50.99   12.80
  -5   0  -5   86.59   13.60
   5   0  -5   54.59   10.70
  -1  -5  -5   43.00   11.30
  -2  -5  -5   33.30   10.60
   5  -2  -5   33.40    9.20
   2   5  -5   28.00    8.90
  -5   2  -5   29.70   11.40
   3   5  -5   23.80    8.10
   5  -3  -5   30.10    8.90
  -3  -5  -5   13.40    9.10
   5  -3   5   13.00    5.00
  -5   3   5    4.80    6.60
   4   5  -5   73.99    9.90
  -4  -5  -5   41.30   12.40
   5  -4  -5   77.29   11.60
   5  -4   5   53.09    7.40
  -4  -5   5   63.89   11.50
   5  -5  -5   14.40    7.90
   5   5  -5    4.70    6.40
  -5  -5  -5   14.60    9.50
  -5  -5   5   -4.00    5.90
  -5   5   5    4.20    6.70
   5  -5   5    3.00    3.70
  -6  -5  -5  141.59   19.60
   5  -6  -5  129.29   16.50
   6   5  -5  147.39   15.00
  -6  -5   5  115.69   17.90
   5  -6   5  129.49   11.10
  -6  -4  -5  168.88   21.20
   6   4  -5  183.68   17.70
   4  -6   5  174.98   13.90
  -6  -4   5  167.88   19.40
   6   3  -5  114.49   13.40
   3  -6  -5   77.09   13.50
  -6  -3  -5  129.59   17.40
   3  -6   5   92.69    9.60
   6   2  -5   -0.70    5.90
  -2   6  -5   -9.40    7.60
   2  -6  -5   10.60    9.10
  -6  -2  -5    1.10    9.40
  -6  -2   5   -7.40    7.00
  -2   6   5    5.40    6.60
  -6  -1  -5    8.90   10.20
  -1   6  -5   13.00    7.90
   1  -6  -5    2.30   10.70
   6   1  -5    3.40    6.70
  -6  -1   5    0.90    6.90
  -1   6   5   -2.20    6.50
   0  -6  -5   46.50   12.60
  -6   0  -5   77.89   13.80
   0   6  -5   68.79   10.90
   6   0  -5   42.50    9.60
   6  -1  -5  106.59   15.20
  -1  -6  -5  102.09   16.20
   1   6  -5  141.89   15.80
  -6   1   5  108.49   14.70
   6  -1   5  104.89   11.80
  -2  -6  -5  -11.70    7.60
   2   6  -5    3.80    6.80
   6  -2  -5    3.70    6.50
   6  -2   5    2.70    4.20
  -6   2   5   -0.50    6.90
   3   6  -5   37.70    8.50
  -3  -6  -5   18.90   10.10
   6  -3  -5   32.90    9.50
  -6   3   5    6.70    7.00
  -3  -6   5   24.70    7.10
   6  -3   5   26.50    5.90
   4   6  -5  -10.00    6.10
   6  -4  -5    7.30    7.40
  -4  -6  -5  -16.10    8.10
  -4  -6   5   -6.70    5.30
  -6   4   5    0.10    6.90
   6  -4   5    6.60    3.90
  -5  -6  -5    7.50    9.30
   5   6  -5   12.30    7.10
   6  -5  -5   30.60    9.50
  -6   5   5    5.20    6.90
  -5  -6   5    5.40    6.00
   6  -5   5    8.80    3.90
   6   6  -5  112.49   12.60
   6  -6  -5   87.69   13.20
  -6  -6  -5   88.19   15.30
  -6  -6   5   81.29   12.20
  -6   6   5   76.19   14.40
   6  -6   5   75.19    8.50
  -7  -6  -5    8.00   10.20
   6  -7  -5    2.10    7.90
   7   6  -5   14.40    6.70
  -6   7   5    5.30    7.00
   6  -7   5    6.20    3.20
  -7  -6   5   15.40    7.60
   5  -7  -5   -1.10    7.00
  -7  -5  -5   11.10   10.00
   7   5  -5   12.30    6.10
  -5   7   5    6.20    7.10
   5  -7   5    0.00    2.80
  -7  -5   5   -4.80    6.70
   4  -7  -5   68.29   12.40
  -7  -4  -5   73.39   14.20
   4  -7   5   65.39    7.40
  -7  -4   5   99.29   15.90
   7   3  -5    7.10    6.50
  -7  -3  -5  -10.40    9.00
   3  -7  -5   -0.80    7.00
  -7  -3   5   10.70    8.30
   3  -7   5   -2.90    3.20
  -3   7   5   -0.50    7.00
   7   2  -5  123.19   15.10
   2  -7  -5  148.69   18.20
  -7  -2   5   83.89   14.90
   2  -7   5  121.29   10.00
   1  -7  -5    0.50   10.10
   7   1  -5    1.00    6.40
  -1   7  -5   -9.30    7.90
  -7  -1   5   -1.20    6.90
  -1   7   5    1.60    6.10
   7   1   5    1.10    4.70
   7   0  -5   17.50    7.90
   0   7  -5    0.80    7.60
  -7   0   5   11.30    6.90
   7   0   5    1.90    4.80
   7  -1  -5   -6.70    6.90
  -1  -7  -5   10.80    9.50
   1   7   5   -1.80    4.50
   7  -1   5   -2.70    4.20
   2   7  -5  101.69   12.50
   7  -2  -5   75.59   13.00
  -2  -7  -5   92.19   15.10
   7  -2   5   83.19   10.30
  -3  -7  -5   40.60   11.70
   7  -3  -5   35.10    9.70
   7  -3   5   35.80    6.20
  -4  -7  -5    7.50    9.50
   4   7  -5    3.90    6.00
   7  -4  -5   -4.80    6.80
  -7   4   5    0.90    7.30
  -4  -7   5    7.90    6.00
   7  -4   5    1.00    3.70
  -5  -7  -5   29.40   10.90
   5   7  -5   51.49    9.00
   7  -5  -5   39.70   10.00
   7  -5   5   45.20    6.20
  -7   5   5   22.80    8.40
  -5  -7   5   42.00    8.70
   7  -6  -5   36.20   10.30
   6   7  -5   33.60    7.60
  -6  -7  -5   42.10   11.60
   7  -6   5   36.60    5.50
  -7   6   5   49.80    9.60
   7  -7  -5   21.10    9.40
  -7  -7  -5   13.50   10.70
   7   7  -5    8.80    5.90
  -7  -7   5   -1.90    6.50
  -7   7   5   16.80    8.40
   7  -7   5    8.00    3.30
   8   7  -5   10.60    6.00
   7  -8  -5   12.40    9.10
  -8  -7   5   -1.40    6.50
  -7   8   5    7.60    7.80
   6  -8  -5  138.19   18.10
   8   6  -5  151.68   15.80
  -8  -6   5  107.09   19.90
   5  -8  -5    4.40    7.80
   8   5  -5   23.70    7.30
  -8  -5   5    8.10    7.80
   8   5   5   19.60    6.30
  -5   8   5   17.40    8.00
   8   4  -5  215.18   20.10
   4  -8  -5  202.48   21.60
   8   4   5  207.58   18.00
  -8  -4   5  195.78   22.30
   8   3  -5    9.10    6.70
   3  -8  -5    7.80    8.60
  -3   8   5   -3.30    7.20
   8   3   5   20.40    5.80
  -8  -3   5   -5.50    7.90
   8   2  -5   -0.80    6.10
   2  -8  -5   34.50   10.20
  -2   8   5   -3.40    7.30
   8   2   5    1.30    4.70
  -8  -2   5   -0.60    7.40
   1  -8  -5   41.80   12.10
   8   1  -5   38.10    9.40
   8   1   5   51.49    8.20
   8   0  -5  176.58   18.40
   0  -8  -5  169.38   21.70
   8   0   5  163.98   15.70
  -8   0   5  187.28   18.90
   8  -2  -5   51.29   10.50
  -2  -8  -5   55.29   12.70
  -2  -8   5   61.69   10.50
   8  -2   5   52.19    7.80
  -3  -8  -5   30.40   10.80
   8  -3  -5   15.40    8.20
  -3  -8   5   35.60    8.50
   8  -3   5   35.50    6.00
  -4  -8  -5   47.60   12.50
   8  -4  -5   32.40   10.20
   8  -4   5   33.80    6.00
  -4  -8   5   40.90    9.20
  -5  -8  -5   62.89   13.70
   8  -5  -5   74.69   12.60
  -5  -8   5   59.59   11.00
   8  -5   5   74.59    8.50
  -6  -8  -5   43.30   12.50
   8  -6  -5   48.40   11.30
  -6  -8   5   40.00    9.20
   8  -6   5   38.40    5.80
  -7  -8  -5   76.99   15.60
   8  -7  -5   79.49   13.20
   8  -7   5   75.39    8.10
   8  -8  -5    5.90    8.90
  -8  -8  -5    1.60   10.00
  -8  -8   5    3.20    6.60
  -8   8   5   -3.70    8.00
   8  -9  -5   13.70    9.80
  -8   9   5   -1.50    8.60
   9   8   5    4.90    6.70
  -9  -8   5   13.70   11.70
   7  -9  -5   42.10   11.30
   9   7  -5   66.99   10.30
   9   7   5   36.50    8.80
  -7   9   5   12.90    9.20
   9   6  -5   11.60    6.50
   6  -9  -5   -6.40    8.00
  -6   9   5    2.20    8.30
   9   6   5    2.70    5.70
  -9  -6   5   -2.60    8.10
   9   5  -5   35.80    7.70
   5  -9  -5   17.70    9.00
  -5   9   5    1.70    8.30
   9   5   5   20.40    6.50
  -9  -5   5   11.90    8.70
   4  -9  -5    6.30    8.40
   9   4  -5   14.10    6.80
  -4   9   5    2.00    7.80
   9   4   5   18.10    6.30
  -9  -4   5   14.20    9.70
   3  -9  -5   44.90   12.10
   9   3   5   63.09    9.20
   2  -9  -5   32.90   12.60
   9   2  -5   40.80   10.20
   9   2   5   47.60    8.20
   1  -9  -5   -7.80    8.60
   9   1  -5   -1.50    6.70
   9   1   5    4.90    4.90
  -1   9   5   -5.70    6.60
  -9  -1   5    4.10    8.00
   9  -1  -5    6.40    7.20
  -1  -9  -5   16.90   10.20
  -9   1   5   -0.50    7.40
   1   9   5   -4.30    5.20
  -1  -9   5   -2.30    6.80
   9  -1   5    1.30    4.60
  -2  -9  -5   60.29   13.20
   9  -2  -5   39.40    9.90
   9  -2   5   39.70    7.30
  -2  -9   5   59.69   10.60
  -3  -9  -5   14.20    9.70
   9  -3  -5   -4.70    6.80
  -9   3   5   -3.30    7.40
  -3  -9   5   31.60    8.50
   9  -3   5    8.10    4.30
   9  -4  -5   44.40   10.70
  -4  -9  -5   49.10   12.90
  -4  -9   5   52.09   10.40
   9  -4   5   52.19    7.10
   9  -5  -5    2.30    7.30
  -5  -9  -5   -3.70    8.90
  -5  -9   5   10.50    7.10
  -9   5   5    2.70    7.90
   9  -5   5    8.30    4.00
   9  -6  -5   16.40    9.50
  -6  -9  -5   37.50   12.50
  -6  -9   5   22.70    8.20
  -9   6   5    1.30    7.90
   9  -6   5   23.20    4.60
  -7  -9  -5   -5.40    9.90
   9  -7  -5   18.10    9.10
  -7  -9   5    9.70    7.10
   9  -7   5    4.60    3.40
  -9   7   5    1.00    8.30
   9  -8  -5   43.10   12.00
  -8  -9  -5   36.60   12.90
   9  -9  -5   29.30   10.60
  -9   9   5   -4.10    8.40
   9   9   5   15.00    7.10
   9 -10  -5   -3.30    8.50
  10   9   5   -2.50    6.10
  -9  10   5  -17.60    8.50
   8 -10  -5   -1.90    8.20
  10   8   5    0.80    5.90
  -8  10   5   -7.70    9.00
  10   7  -5   52.39    9.30
   7 -10  -5   36.90   11.20
  -7  10   5   16.30   10.50
  10   7   5   32.10    8.70
 -10  -7   5   50.69   15.60
   6 -10  -5    0.60    8.60
  10   6  -5   21.70    7.20
  10   6   5    6.70    6.10
 -10  -6   5   -6.10    8.00
  -6  10   5    0.50    8.80
   5 -10  -5  135.99   20.30
  10   5  -5  203.68   19.40
 -10  -5   5  179.98   23.40
  10   5   5  190.28   17.60
  10   4  -5   14.10    7.70
   4 -10  -5    1.80    8.30
 -10  -4   5   -2.40    9.00
  10   4   5    8.50    5.80
  -4  10   5   -2.20    9.20
   3 -10  -5   36.80   11.50
  10   3  -5   25.40    8.70
  -3  10   5    9.50    8.80
  10   3   5   28.40    7.30
 -10  -3   5   17.70    9.60
   2 -10  -5   -4.00   10.20
  10   2  -5    5.50    7.10
  -2  10   5   -0.60    7.90
 -10  -2   5   -7.00    8.10
  10   2   5    5.40    5.30
   1 -10  -5   20.70   11.30
  10   1  -5   31.50    8.80
  10   1   5   36.40    7.30
 -10  -1   5    6.80    8.20
  -1  10   5   11.80    8.00
  10   0  -5   15.10    8.60
   0 -10  -5   12.00   10.20
  10   0   5   18.70    6.10
 -10   0   5    0.70    7.60
   0  10   5    0.80    5.70
  10  -1  -5   11.70    8.50
  -1 -10  -5   23.50   11.40
   1  10   5   28.00    8.70
  -1 -10   5   28.60    9.00
  10  -1   5   28.00    6.50
 -10   1   5   13.30    8.60
  -2 -10  -5    6.70    9.90
  10  -2  -5   -6.00    7.20
  10  -2   5    7.10    4.80
 -10   2   5    0.40    7.80
  -2 -10   5    3.60    7.40
  -3 -10  -5   20.00   10.80
  10  -3  -5   28.20    9.30
  10  -3   5   20.20    5.40
  -3 -10   5   20.70    9.20
 -10   3   5    6.30    8.20
  -4 -10  -5   81.49   15.40
  10  -4  -5   62.79   12.30
  -4 -10   5  100.29   16.30
  10  -4   5   71.49    9.40
  -5 -10  -5   12.90   10.60
  10  -5  -5   20.40    8.50
  10  -5   5   15.30    4.60
 -10   5   5    8.10    8.40
  -5 -10   5   11.40    8.80
  -6 -10  -5  164.48   22.40
  10  -6  -5  138.39   18.80
  10  -6   5  152.88   12.90
  10  -7  -5  -11.60    8.10
  -7 -10  -5   -6.40   10.20
 -10   7   5    0.30    8.40
  10  -7   5   -2.50    3.20
  -8 -10  -5   23.60   11.80
  10  -8  -5   -2.80    9.20
 -10   8   5   -1.30    9.10
  10  -9  -5    0.90    8.80
   9  10   5    6.70    6.90
 -10   9   5   -1.00    9.20
  10 -10  -5   29.90   11.10
  10  10   5   52.89    9.80
 -10  10   5    5.80   12.80
  10 -11  -5   19.10   10.60
  11  10   5   22.70    8.30
   9 -11  -5    2.80    9.40
  11   9   5    9.50    6.70
   8 -11  -5   13.40    9.60
  -8  11   5   28.60   20.20
  11   8   5   19.20    7.50
   7 -11  -5    5.60    8.60
  11   7  -5   25.00    7.50
  11   7   5    3.10    6.30
  -7  11   5   -7.70    9.50
   6 -11  -5   15.10    9.10
  11   6  -5   17.10    7.10
  -6  11   5    2.80   10.30
  11   6   5    8.20    6.60
  11   5  -5   12.60    7.10
   5 -11  -5   -0.20    8.40
  11   5   5    2.90    5.90
  -5  11   5   -4.40    9.90
 -11  -5   5   47.30   12.50
   4 -11  -5   -4.70    8.70
  11   4  -5   -1.50    7.00
 -11  -4   5   -4.40    9.50
  -4  11   5    0.40    9.90
  11   4   5    2.40    5.40
  11   3  -5   43.30   10.60
   3 -11  -5   33.50   11.60
  11   3   5   51.69    9.00
   2 -11  -5  -13.80    8.50
  11   2  -5   -0.30    6.90
 -11  -2   5   -4.80    8.60
  -2  11   5   19.10   10.50
  11   2   5    8.00    5.60
   1 -11  -5   13.10   10.50
  11   1  -5    8.10    7.60
  11   1   5    4.20    5.50
 -11  -1   5   -5.70    8.10
  -1  11   5    1.90    6.30
   1 -11   5    3.70    8.90
  11   0  -5    7.30    7.80
   0 -11  -5   18.70   10.00
 -11   0   5   -6.60    7.90
   0  11   5    9.00    7.20
   0 -11   5    6.00    8.00
  11   0   5    4.40    5.30
  11  -1  -5   14.20    8.60
  -1 -11  -5   26.40   10.70
 -11   1   5   11.80    8.60
  -1 -11   5   15.40    9.70
   1  11   5    0.10    7.00
  11  -1   5   25.10    6.50
  -2 -11  -5    2.30    9.40
  11  -2  -5   -2.50    8.10
 -11   2   5    8.90    8.70
  11  -3  -5   20.30    8.90
  -3 -11  -5   20.60   10.90
 -11   3   5    1.50    8.10
  11  -3   5   20.80    5.80
  11  -4  -5   34.60   10.60
  -4 -11  -5   21.00   11.90
  11  -4   5   44.10    6.90
  -5 -11  -5   49.10   12.80
  11  -5  -5   -7.60    7.30
 -11   5   5    7.10    8.90
  11  -5   5   -3.10    3.80
  11  -6  -5    1.70    7.70
  -6 -11  -5   -1.70   10.20
  11  -6   5   -1.20    3.60
 -11   6   5    8.30    9.40
  -7 -11  -5    8.00   11.00
  11  -7  -5    8.50    8.90
 -11   7   5    2.00    8.40
  11  -7   5   12.80    4.20
  11  -8  -5   39.50   11.70
 -11   8   5   13.30   11.00
  11  -9  -5   14.60    9.70
   9  11   5    0.60    7.00
 -11   9   5    4.20   11.20
  11 -10  -5    6.00    9.30
  10  11   5    3.70    7.40
  11 -11  -5    2.80    9.70
  11  11   5    3.50    7.00
  11 -12  -5   10.10   10.80
  12  11   5    1.10    7.30
  10 -12  -5   27.90   11.70
  12  10   5   14.30    7.90
   9 -12  -5   -0.30    9.60
  12   9   5    8.60    7.30
   8 -12  -5   -5.10    9.60
  12   8   5   17.80    7.30
   7 -12  -5    2.50    9.60
  12   7  -5   21.30    8.20
  12   7   5   17.40    7.30
   6 -12  -5  128.49   17.90
  12   6  -5  107.39   16.00
  12   6   5  133.59   15.10
   5 -12  -5   12.60   10.20
  12   5  -5   18.90    8.90
  12   5   5   15.40    6.60
 -12  -5   5   -3.00   11.20
  -5  12   5   -6.00   11.30
  12   4  -5   57.69   12.10
   4 -12  -5   61.39   13.50
  12   4   5   60.99   10.00
  12   3  -5    9.30    8.00
   3 -12  -5    2.80    9.30
  12   3   5   -1.90    5.40
  -3  12   5   -4.20   10.00
 -12  -3   5   -2.20    9.80
  12   2  -5    5.40    7.90
   2 -12  -5    6.60    9.60
  -2  12   5   -2.30    7.50
  12   2   5    6.70    5.90
 -12  -2   5   -5.90    9.40
  12   1  -5   58.59   12.10
   1 -12  -5   65.09   14.20
  12   1   5   63.39    9.40
  -1  12   5   48.00   12.40
  12   0  -5   46.80   11.40
   0 -12  -5   65.59   14.30
  12   0   5   55.99    9.00
  -1 -12  -5   26.70   11.20
  12  -1  -5    7.90    8.90
   1  12   5   43.80   11.50
  12  -1   5   25.50    6.70
  12  -2  -5    2.00    8.40
  -2 -12  -5   12.80   10.20
 -12   2   5    1.50    8.70
  12  -2   5    3.40    5.20
  -3 -12  -5   23.50   11.20
  12  -3  -5   17.10    8.90
  12  -3   5   10.90    5.60
 -12   3   5   -1.40    8.60
  12  -4  -5   -4.20    8.20
  -4 -12  -5   -0.60    9.50
  12  -4   5    1.10    4.40
 -12   4   5   -2.30    8.50
  12  -5  -5   44.10   11.60
  -5 -12  -5   38.90   13.40
  12  -5   5   52.29    7.40
  -6 -12  -5    1.30   11.20
  12  -6  -5   19.30    9.50
 -12   6   5    5.70    9.60
  12  -6   5   -1.30    3.80
  12  -7  -5   41.70   12.40
  -7 -12  -5   85.29   16.20
  12  -7   5   60.99    8.30
  12  -8  -5    1.90    8.60
  12  -9  -5    7.00    9.70
   9  12   5    8.30    7.90
  12 -10  -5   19.70   11.30
  10  12   5   30.60    9.60
  12 -11  -5    0.70    9.30
  11  12   5   14.80    8.50
  12 -12  -5   11.90   10.80
  12  12   5   11.30    7.90
  12 -13  -5    2.10   10.40
  13  12   5   -4.60    6.80
  11 -13  -5    4.70   10.30
  13  11   5   -1.90    6.80
  10 -13  -5    8.70   10.20
  13  10   5   -2.50    6.30
   9 -13  -5   21.40   10.80
  13   9   5   -0.30    6.40
   8 -13  -5    3.10   10.20
  13   8   5   17.30    7.80
   7 -13  -5   -5.10    9.00
  13   7  -5    2.80    6.90
  13   7   5    1.60    6.50
   6 -13  -5   -4.20    9.40
  13   6  -5    9.30    7.70
  13   6   5   -8.10    5.40
   5 -13  -5   -6.70    9.90
  13   5  -5   20.00    9.20
  13   5   5    8.60    6.80
   4 -13  -5   12.30   11.30
  13   4  -5    7.30    8.20
 -13  -4   5   -8.70   13.50
  13   4   5   26.70    7.20
  13   3  -5    1.50    8.20
   3 -13  -5   -8.00    9.30
 -13  -3   5  -14.60   10.70
  13   3   5    5.30    5.70
  13   2  -5   39.80   11.20
   2 -13  -5   35.90   13.00
  13   2   5   39.60    8.40
   1 -13  -5    3.20   10.00
  13   1  -5    1.50    8.30
 -13  -1   5   -2.20    9.40
  -1  13   5    2.10   10.20
  13   1   5    3.20    5.70
  13   0  -5    7.20    8.70
   0 -13  -5   15.30   10.80
  13   0   5    0.60    5.40
 -13   0   5   -6.10    8.80
  -1 -13  -5   40.40   12.50
  13  -1  -5   23.80   10.20
  13  -1   5   40.80    8.00
  -2 -13  -5   31.90   12.10
  13  -2  -5    9.30    9.10
  13  -2   5   32.40    7.20
 -13   2   5    6.70    9.50
  13  -3  -5    5.00    8.80
  -3 -13  -5   11.80   11.20
 -13   3   5   10.50    9.50
  13  -3   5    9.80    5.80
  13  -4  -5    9.10    8.90
  -4 -13  -5  -10.20   10.60
 -13   4   5   -7.40    9.10
  13  -4   5    1.30    4.90
  13  -5  -5   14.20    9.90
  -5 -13  -5    7.80   12.00
 -13   5   5   -8.30    9.70
  13  -5   5    8.20    4.90
  13  -6  -5   22.50   10.40
  -6 -13  -5   -4.30   11.80
  13  -6   5   19.80    5.40
 -13   6   5    4.10   12.30
  -7 -13  -5   11.00   11.70
  13  -7  -5   14.20   10.20
  13  -7   5    9.30    4.70
  13  -8  -5    3.90    9.20
   8  13   5   14.40    7.50
  13  -9  -5    4.20   10.20
   9  13   5    5.00    7.10
  13 -10  -5    2.50    9.90
  10  13   5   13.60    8.30
  13 -11  -5  -15.60    9.10
  11  13   5   -5.90    6.70
  13 -12  -5  -15.20    9.70
  12  13   5    3.30    7.60
  13 -13  -5    5.80   11.10
  13  13   5    5.00    7.80
  13 -14  -5   17.10   12.10
  14  13   5   14.00    8.30
  12 -14  -5    8.60   11.50
  14  12   5   13.30    7.80
  11 -14  -5   12.80   11.30
  14  11   5    6.80    7.30
  10 -14  -5    0.60   10.10
  14  10   5   -5.90    6.40
   9 -14  -5   -6.10    9.10
  14   9   5    4.80    6.70
   8 -14  -5    0.50    9.90
  14   8   5    4.60    6.80
  14   7  -5   -9.30    8.00
   7 -14  -5   11.10   10.80
  14   7   5   31.60    8.50
  14   6  -5   -4.90    7.70
   6 -14  -5   14.10   10.70
  14   6   5    7.80    6.40
  14   5  -5   10.90    8.70
   5 -14  -5   -2.60    9.70
  14   5   5   17.70    7.20
  14   4  -5    4.30    8.50
   4 -14  -5   13.80   10.90
  14   4   5    7.40    6.30
  14   3  -5   -8.30    7.80
   3 -14  -5    0.70    9.90
  14   3   5   -5.00    5.50
  14   2  -5   30.70   10.60
   2 -14  -5   20.70   11.60
  14   2   5   30.90    7.90
  14   1  -5    5.90    9.20
   1 -14  -5    4.50   10.20
  14   1   5   -4.90    5.50
   0 -14  -5   74.09   15.20
  14   0  -5   53.49   13.90
  14   0   5   83.09   10.90
  -1 -14  -5   14.70   10.50
  14  -1  -5   -4.20    7.90
  14  -1   5    3.70    5.80
  14  -2  -5   -4.00    8.40
  -2 -14  -5    8.20   10.40
  14  -2   5   -6.30    5.20
 -14   2   5   -1.50   11.60
  -3 -14  -5   28.60   12.80
  14  -3  -5   42.40   11.80
  14  -3   5   36.90    7.60
 -14   3   5    7.40   13.80
  -4 -14  -5  117.29   18.80
  14  -4  -5   93.39   16.00
  14  -4   5  115.79   12.80
  14  -5  -5   65.59   14.00
  -5 -14  -5   68.19   15.70
  14  -5   5   80.29   10.50
  14  -6  -5   53.89   13.60
  -6 -14  -5   63.39   15.70
  14  -6   5   64.99    8.50
  14  -7  -5   -6.70    8.60
  -7 -14  -5    6.50   11.50
  14  -7   5    0.20    4.10
  14  -8  -5   -1.20    9.00
   8  14   5    9.60    7.60
  14  -9  -5   -0.90    9.80
   9  14   5   16.50    8.00
  14 -10  -5    4.00   10.40
  10  14   5   12.50    8.40
  14 -11  -5   26.20   12.70
  11  14   5   24.20    9.30
  14 -12  -5   -4.70   10.30
  12  14   5    2.70    7.90
  14 -13  -5    3.80   11.00
  13  14   5    1.80    7.40
  12 -15  -5   14.80   11.50
  15  12   5   -0.20    6.80
  11 -15  -5    3.90   10.70
  15  11   5    7.00    7.50
  10 -15  -5    3.60   10.60
  15  10   5   10.50    7.40
   9 -15  -5    1.20   10.40
  15   9   5    6.50    6.70
   8 -15  -5    4.40   10.00
  15   8   5    1.00    6.60
   7 -15  -5    0.00    9.80
  15   7   5   -7.50    5.80
  15   6  -5   -6.10    8.40
   6 -15  -5    7.30   10.40
  15   6   5   -2.30    5.80
  15   5  -5   -4.50    8.10
   5 -15  -5    0.20    9.90
  15   5   5   -0.50    6.10
  15   4  -5   11.10    9.60
   4 -15  -5   -1.10   10.00
  15   4   5   10.00    6.80
  15   3  -5   -3.20    8.60
   3 -15  -5   -4.30    9.90
  15   3   5    0.40    5.90
   2 -15  -5    8.70   10.80
  15   2  -5   17.30    9.90
  15   2   5   21.50    7.80
  15   1  -5   -3.70    8.60
   1 -15  -5   -6.30    9.30
  15   1   5   -7.60    5.40
  15   0  -5    3.60    8.90
   0 -15  -5   -1.10    9.90
  15   0   5   -5.60    5.60
  -1 -15  -5   -0.20    9.50
  15  -1  -5    1.70    8.70
  15  -1   5   -0.20    5.80
  -2 -15  -5   31.90   13.00
  15  -2  -5   36.30   11.40
  15  -2   5   43.40    8.50
  15  -3  -5   -4.70    8.30
  -3 -15  -5  -16.20    9.60
  15  -3   5    1.10    5.60
  -4 -15  -5   23.60   12.60
  15  -4  -5   11.90   10.10
  15  -4   5   10.10    6.00
  -5 -15  -5   13.20   11.80
  15  -5  -5   -1.30    9.20
  15  -5   5   -1.90    4.90
  -6 -15  -5   12.30   12.10
  15  -6  -5    0.20    9.90
  15  -6   5   14.10    5.80
  -7 -15  -5   -0.20   11.20
  15  -7  -5   -8.20    9.30
  15  -7   5   -1.90    4.30
  15  -8  -5    4.10   10.20
   8  15   5   20.20    8.30
  15  -9  -5  -10.60    9.40
   9  15   5   -1.90    7.00
  15 -10  -5   -4.10   10.70
  10  15   5   -4.80    7.20
  15 -11  -5   -0.40   11.20
  11  15   5   -2.40    7.30
  15 -12  -5    1.90   11.00
  12  15   5    4.50    7.80
  11 -16  -5    3.60   10.80
  10 -16  -5   -6.20    9.90
  16  10   5   -4.50    6.20
   9 -16  -5   12.50   11.40
  16   9   5    9.10    7.20
   8 -16  -5   60.19   15.30
  16   8   5   57.29   11.00
   7 -16  -5   34.50   13.10
  16   7   5   38.90    9.10
  16   6  -5   18.60   10.80
   6 -16  -5   30.30   12.60
  16   6   5   38.30    9.00
  16   5  -5   -9.40    8.10
   5 -16  -5   -2.40    9.90
  16   5   5   -3.10    6.00
  16   4  -5   -4.60    8.50
   4 -16  -5  -14.00    9.40
  16   4   5   -0.30    6.50
  16   3  -5   13.00    9.40
   3 -16  -5   17.50   11.40
  16   3   5    7.80    6.90
  16   2  -5    2.20    9.30
   2 -16  -5    4.80   10.60
  16   2   5   -1.70    6.10
   1 -16  -5   13.20   11.20
  16   1  -5    3.90    9.30
  16   1   5    6.00    6.60
   0 -16  -5   -0.40   10.20
  16   0  -5    4.20    9.20
  16   0   5    2.90    6.20
  16  -1  -5   -3.20    8.90
  -1 -16  -5    2.10   10.30
  16  -1   5   -0.60    5.80
  -2 -16  -5    3.60   11.50
  16  -2  -5    3.10    9.10
  16  -2   5   -0.80    6.00
  -3 -16  -5    5.10   11.40
  16  -3  -5    4.00    9.60
  16  -3   5    3.90    5.80
  16  -4  -5   40.60   12.90
  -4 -16  -5   26.40   13.60
  16  -4   5   60.09    9.20
  -5 -16  -5    3.90   11.70
  16  -5  -5  -16.10    9.00
  16  -5   5   -0.30    5.20
  -6 -16  -5   17.40   12.10
  16  -6  -5    1.90   10.50
  16  -6   5   17.20    6.00
  16  -7  -5    2.30   10.50
  16  -7   5    6.90    5.40
  16  -8  -5   13.20   11.80
   8  16   5   37.90   10.20
  16  -9  -5    7.00   11.50
   9  16   5   12.80    8.40
  16 -10  -5   21.30   12.30
  10  16   5   33.30   10.20
  16 -11  -5    3.20   11.30
  11  16   5    8.00    8.30
   9 -17  -5   -0.30   10.50
  17   9   5   -4.00    6.50
   8 -17  -5    8.90   11.00
  17   8   5   -3.50    6.70
   7 -17  -5   -8.70   10.10
  17   7   5   -4.90    6.40
   6 -17  -5   12.90   11.80
  17   6  -5    6.00   10.40
  17   6   5   17.40    8.10
   5 -17  -5    5.70   11.00
  17   5  -5   -0.50    9.30
  17   5   5    0.20    6.40
  17   4  -5   11.20   10.10
   4 -17  -5   15.90   11.90
  17   4   5    6.20    6.90
   3 -17  -5   -0.20   10.50
  17   3  -5    3.60   10.00
  17   3   5   -6.90    5.90
   2 -17  -5   -2.10   10.10
  17   2  -5   -7.40    8.70
  17   2   5    1.10    6.30
   1 -17  -5   10.40   11.60
  17   1  -5   -7.60    9.00
  17   1   5   -4.50    5.90
   0 -17  -5   12.10   11.60
  17   0  -5    2.70    9.40
  17   0   5    1.40    6.30
  -1 -17  -5   17.80   13.30
  17  -1  -5    0.60    9.60
  17  -1   5    9.50    6.70
  -2 -17  -5   10.00   12.10
  17  -2  -5   10.50   10.30
  17  -2   5   15.90    7.00
  17  -3  -5   10.50   10.40
  -3 -17  -5   14.70   12.40
  17  -3   5    0.20    6.00
  -4 -17  -5   -3.60   11.70
  17  -4  -5    8.10   10.70
  17  -4   5   11.60    6.70
  -5 -17  -5    7.40   12.40
  17  -5  -5   -2.00   10.30
  17  -5   5   -1.60    5.10
  -6 -17  -5   15.30   12.70
  17  -6  -5   -0.70   10.40
  17  -6   5    9.20    5.80
  17  -7  -5   12.30   11.70
  17  -7   5    0.50    7.90
   7  17   5   12.00    8.10
  17  -8  -5   24.90   13.00
   8  17   5   33.30   10.20
  17  -9  -5    9.60   12.00
   9  17   5   -0.70    8.00
   7 -18  -5   -9.50   10.60
  18   7   5   -1.20    6.70
   6 -18  -5    6.20   12.30
  18   6  -5   10.60   10.30
  18   6   5    7.30    7.50
   5 -18  -5    9.70   11.70
  18   5  -5   -0.20    9.70
  18   5   5    5.50    7.10
   4 -18  -5   12.00   11.70
  18   4  -5    6.90   10.40
  18   4   5    5.60    7.30
   3 -18  -5   18.20   12.10
  18   3  -5   13.30   11.00
  18   3   5   34.30    8.80
   2 -18  -5   55.59   14.90
  18   2  -5   33.40   13.00
  18   2   5   50.69    9.90
  18   1  -5   -5.20    9.60
   1 -18  -5    4.80   11.40
  18   1   5    6.40    6.80
  18   0  -5  -11.10    9.00
   0 -18  -5    5.20   11.50
  18   0   5    1.10    6.60
  18  -1  -5    2.50   10.50
  -1 -18  -5   25.10   13.60
  18  -1   5    1.30    6.70
  18  -2  -5   27.10   11.90
  -2 -18  -5    9.20   12.80
  18  -2   5   18.60    7.60
  -3 -18  -5   45.70   15.60
  18  -3  -5   35.50   13.00
  18  -3   5   37.10    8.70
  -4 -18  -5    2.50   12.40
  18  -4  -5   -6.90   10.20
  18  -4   5    2.70    5.80
  -5 -18  -5    6.80   12.80
  18  -5  -5    6.00   11.20
  18  -5   5    7.00    6.10
  -6 -18  -5    7.80   13.00
  18  -6  -5    8.20   11.40
  18  -6   5   -2.20    5.10
  18  -7  -5   -7.70   10.60
   7  18   5   10.60    7.90
   4 -19  -5   29.50   13.70
  19   4  -5   16.10   10.90
   3 -19  -5    1.90   11.20
  19   3  -5   -5.20    9.20
  19   3   5    9.60    7.20
  19   2  -5    5.30   10.40
   2 -19  -5    0.60   11.20
  19   2   5    0.80    6.30
  19   1  -5    9.30   10.60
   1 -19  -5    2.80   11.80
  19   1   5   -4.90    6.20
   0 -19  -5   31.30   14.40
  19   0  -5   10.60   10.90
  19   0   5   19.90    8.00
  19  -1  -5    5.20   11.10
  -1 -19  -5   -4.60   12.10
  19  -1   5    2.50    6.90
  -2 -19  -5   -4.70   11.60
  19  -2  -5   -5.00   10.30
  19  -2   5   -4.00    6.50
  -3 -19  -5    2.20   12.70
  19  -3  -5   -1.30   10.70
  19  -3   5    0.60    6.10
  19  -4  -5    3.90   10.80
  -4 -19  -5   -1.10   12.50
   0   0  -6  383.16   32.20
   1   1  -6   18.10    9.40
  -1   1  -6   18.90    9.90
   1  -1  -6   25.50   10.10
  -1  -1  -6    5.60    9.50
   2   1  -6  125.19   16.50
  -2  -1  -6   76.99   14.90
  -1   2  -6   79.39   14.50
   1  -2  -6   71.09   13.70
  -2   0  -6   43.80   12.60
   0  -2  -6   77.29   13.50
   2   0  -6   56.69   12.20
   0   2  -6   71.09   13.30
  -1  -2  -6   36.00   11.20
   1   2  -6   78.89   12.50
   2  -1  -6   30.80   10.50
  -2   1  -6   31.50   11.70
   2  -2  -6   37.30   11.00
  -2   2  -6   38.80   11.90
   2   2  -6   32.10    9.90
  -2  -2  -6   22.50   11.00
   2  -3  -6    8.50    9.90
  -2   3  -6   24.70   10.90
  -3  -2  -6    9.10   10.40
   3   2  -6   13.40    8.80
  -1   3  -6   29.20   10.30
  -3  -1  -6    2.80    9.70
   1  -3  -6   -4.00    8.40
   3   1  -6   12.20    8.30
   0  -3  -6    5.00    9.30
   3   0  -6    9.10    8.40
  -3   0  -6    1.60   10.30
   0   3  -6    4.00    9.70
  -3   1  -6   38.30   11.60
  -1  -3  -6   17.20   10.10
   1   3  -6   34.10   10.60
   3  -1  -6   20.40    9.40
   2   3  -6    6.80    8.60
  -3   2  -6   -3.90    9.90
   3  -2  -6  -10.00    7.50
  -2  -3  -6   21.40   10.30
   3  -3  -6   18.80    9.60
  -3  -3  -6   24.70   11.20
  -3   3  -6   29.30   11.70
  -3   4  -6    5.10   10.40
   4   3  -6   14.90    8.80
   3  -4  -6   11.50    9.10
  -4  -3  -6   11.40   10.10
   4   2  -6   57.29   11.90
   2  -4  -6   60.09   13.50
  -2   4  -6   70.49   13.50
  -4  -2  -6   69.29   14.70
  -1   4  -6   49.20   12.30
  -4  -1  -6   35.70   12.10
   1  -4  -6   47.00   12.40
   4   1  -6   36.90   10.40
   0  -4  -6   56.09   13.30
   0   4  -6  111.49   15.20
   4   0  -6   62.49   12.30
  -4   0  -6  100.39   16.50
   4  -1  -6   43.80   10.90
  -1  -4  -6   55.79   13.30
  -4   1  -6   54.39   13.20
   4  -2  -6    0.50    7.70
  -4   2  -6  -11.70    9.80
   2   4  -6    2.30    8.70
  -2  -4  -6    4.30    9.50
  -4   2   6   -4.10    5.50
  -3  -4  -6   11.10   10.50
   4  -3  -6   10.40    7.90
   3   4  -6   18.50    9.00
  -4   3  -6   21.30   11.70
   4  -4  -6    8.50    8.50
  -4   4  -6   -5.10   10.80
  -4  -4  -6   -0.80    9.70
   4   4  -6   14.90    8.70
   4  -5  -6   88.19   14.30
  -5  -4  -6   85.69   16.20
   5   4  -6  126.59   16.30
   4  -5   6  102.09   10.90
   5   3  -6   20.30    8.90
  -3   5  -6    3.10   10.70
  -5  -3  -6   -0.50    9.80
   3  -5  -6   12.00    9.20
  -3   5   6   -4.30    5.90
  -2   5  -6   20.90   10.40
  -5  -2  -6   13.60   11.20
   5   2  -6   10.00    8.50
   2  -5  -6   21.60   11.20
  -1   5  -6    0.50    9.00
   1  -5  -6   -9.50    8.70
  -5  -1  -6  -10.20    9.50
   5   1  -6    1.40    7.70
  -5  -1   6   -8.50    5.90
  -5   0  -6   10.50   11.20
   5   0  -6   22.60    9.00
   0   5  -6   19.70   10.20
   0  -5  -6    5.70    9.20
   5  -1  -6    1.10    7.60
   1   5  -6   10.30    9.00
  -5   1  -6   -2.50   10.80
  -1  -5  -6   -5.50    9.30
  -5   1   6    2.10    6.30
   2   5  -6   70.89   12.10
  -5   2  -6   30.50   13.20
  -2  -5  -6   45.30   12.50
   5  -2  -6   33.80   10.20
  -3  -5  -6   -0.20    9.20
   5  -3  -6    7.70    7.50
   3   5  -6   18.30    8.50
  -5   3   6    0.20    6.60
   5  -4  -6   22.70    9.80
   4   5  -6   45.40   10.00
  -4  -5  -6   14.40   10.50
  -5   4   6    6.60    6.60
   5  -4   6   15.30    5.50
   5   5  -6   29.10    9.30
  -5  -5  -6    9.80   10.60
   5  -5  -6   22.10    9.40
   5  -5   6    8.60    5.00
   5  -6  -6   -1.90    8.60
   6   5  -6   24.10    8.70
  -6  -5  -6   -4.20   10.20
  -5   6   6    0.80    7.00
   5  -6   6    0.10    3.90
   6   4  -6   77.59   12.50
  -6  -4  -6   50.39   14.20
   4  -6  -6   59.29   13.10
   4  -6   6   55.59    7.70
  -6  -3  -6   73.59   15.30
   3  -6  -6   53.69   12.90
   6   3  -6   65.49   12.40
   3  -6   6   64.09    8.50
   6   2  -6   87.59   14.20
  -6  -2  -6   89.79   16.60
   2  -6  -6   90.19   16.00
   1  -6  -6    7.60   10.10
  -6  -1  -6   -1.30   11.40
   6   1  -6    3.80    8.30
  -6  -1   6   -6.60    6.40
   0  -6  -6   63.59   14.10
   6   0  -6   65.29   12.60
  -6   0  -6   79.59   15.70
  -1  -6  -6   30.50   11.80
   6  -1  -6   30.50    9.70
  -2  -6  -6   -4.30    9.20
   6  -2  -6    2.10    8.50
  -6   2   6   -3.40    6.50
   6  -2   6   10.50    5.40
  -3  -6  -6   12.40   10.10
   6  -3  -6    5.40    8.10
   6  -3   6   -0.80    4.50
  -6   3   6   -3.60    6.50
   6  -4  -6   78.99   13.90
  -4  -6  -6   74.19   14.60
   6  -4   6   72.99    9.40
  -5  -6  -6   36.20   12.40
   6  -5  -6   39.40   10.80
   6  -5   6   34.00    6.40
   6   6  -6   34.70   14.90
   6  -6  -6   29.60   10.20
  -6  -6  -6   21.40   11.40
  -6   6   6   17.00    8.30
   6  -6   6   15.90    5.00
  -7  -6  -6   18.30   11.90
   6  -7  -6   10.60    8.90
  -6   7   6    4.70    9.40
   7   5  -6   56.79   11.80
  -7  -5  -6   50.89   13.80
   5  -7  -6   45.80   11.70
   7   4  -6    6.90    8.70
   4  -7  -6   33.10   10.10
  -7  -4  -6    3.20   11.40
  -7  -4   6   -6.20    8.10
  -4   7   6    4.90    7.20
  -7  -3  -6   12.90   11.40
   3  -7  -6    0.40    9.10
   7   3  -6   23.80    9.20
  -3   7   6   -0.70    6.50
  -7  -3   6   -7.90    7.30
   2  -7  -6   19.30   10.50
  -7  -2  -6    3.70   11.10
   7   2  -6    7.70    7.90
  -2   7   6   -9.90    6.00
  -7  -2   6   -7.10    6.90
   1  -7  -6    5.10    9.40
   7   1  -6    4.20    7.90
  -1   7   6   -1.70    5.90
  -7  -1   6   -2.30    6.70
   7   0  -6   37.60   10.60
   0  -7  -6   49.90   12.50
   7   0   6   32.20    7.70
  -1  -7  -6   10.70   10.20
   7  -1  -6    9.70    8.00
  -7   1   6    6.40    7.30
   7  -1   6   19.70    6.50
  -2  -7  -6    4.10    9.90
   7  -2  -6   21.20    9.10
   7  -2   6    6.00    5.80
  -7   2   6   -3.40    7.00
   7  -3  -6    5.70    8.40
  -3  -7  -6    8.30   10.10
  -7   3   6  -11.30    6.50
   7  -3   6   -2.60    4.60
   7  -4  -6   19.00   10.10
  -4  -7  -6    8.10   10.40
  -7   4   6   -3.30    7.20
   7  -4   6    4.30    4.60
  -5  -7  -6    8.60   10.50
   7  -5  -6    2.70    8.60
  -7   5   6    1.20    7.50
   7  -5   6   -4.90    3.80
  -6  -7  -6   45.20   13.50
   7  -6  -6   49.40   11.80
   7  -6   6   40.00    6.40
  -7  -7  -6   15.40   11.90
   7  -7  -6    7.20    9.00
   7  -8  -6   22.90   10.30
  -8  -7  -6   19.90   12.10
   6  -8  -6   25.10   10.30
  -8  -6  -6   22.40   12.50
   5  -8  -6   -7.30    8.00
   8   5  -6   12.30    7.50
   8   4  -6    5.40    7.80
   4  -8  -6   -4.10    9.00
  -4   8   6    7.50    9.70
   8   4   6    7.60    6.70
   8   3  -6   58.39   11.40
   3  -8  -6   51.39   13.80
   8   3   6   59.19   10.40
   2  -8  -6    1.40    9.60
   8   2  -6    9.30    7.90
  -8  -2   6    2.90    8.20
   8   2   6    3.90    6.50
  -2   8   6   -0.60    6.40
   8   1  -6   29.70    9.90
   1  -8  -6   30.60   11.60
   8   1   6   32.20    7.80
  -8  -1   6   -1.20    7.30
   0  -8  -6   -0.90    9.20
   8  -1  -6    9.20    8.30
  -1  -8  -6   -1.30    9.30
   1   8   6   -0.60    6.00
  -8   1   6   -3.80    7.20
   8  -1   6   12.40    6.40
   8  -2  -6   10.30    8.70
  -2  -8  -6    8.40   10.40
  -8   2   6   -0.70    7.80
   8  -2   6    9.90    5.80
   8  -3  -6   25.70   10.10
  -3  -8  -6   29.80   12.10
   8  -3   6   32.70    6.80
   8  -4  -6   86.69   14.70
  -4  -8  -6   79.39   15.70
   8  -4   6   76.29   10.50
   8  -5  -6   -4.50    8.30
  -5  -8  -6    0.70   10.10
  -8   5   6   -4.80   10.70
   8  -5   6    1.60    4.20
   8  -6  -6   31.50   11.10
  -6  -8  -6   26.70   12.50
   8  -6   6   27.30    5.80
  -7  -8  -6   14.60   11.70
   8  -7  -6   22.10   10.60
  -8  -8  -6   73.59   15.50
   8  -8  -6   48.10   13.90
   8  -9  -6   -4.90    9.40
   9   8   6    8.90    7.50
   7  -9  -6    0.40    9.70
   9   7   6    4.30    7.10
   6  -9  -6   24.80   11.30
   9   6   6   13.80    8.50
   5  -9  -6   -5.60    9.30
   9   5  -6   16.10    8.00
   9   5   6    1.50    6.70
   9   4  -6   58.99   11.30
   4  -9  -6   31.90   12.40
   9   4   6   38.80    9.30
   9   3  -6    6.30    8.10
   3  -9  -6    7.80   10.30
  -3   9   6   -1.40    7.80
   9   3   6    2.60    6.40
   9   2  -6   24.90    9.20
   2  -9  -6   22.30   11.00
   9   2   6   30.50    7.90
   1  -9  -6   17.00   10.60
   9   1  -6    0.90    8.00
  -1   9   6   -1.30    7.10
   9   1   6    5.40    6.50
   9   0  -6    4.40    8.10
   0  -9  -6   -5.40    9.10
   9   0   6   24.80    6.90
   0   9   6   20.10    7.60
  -1  -9  -6   21.70   10.80
   9  -1  -6    9.90    8.90
  -9   1   6   -4.70    9.30
   9  -1   6   13.20    6.20
   1   9   6   -1.40    6.70
   9  -2  -6    5.20    9.00
  -2  -9  -6   15.80   10.80
   9  -2   6   21.60    6.50
  -9   2   6    6.60   10.30
  -3  -9  -6   -3.20   10.20
   9  -3  -6   -4.40    7.60
   9  -3   6    2.10    5.10
   9  -4  -6   22.70   10.30
  -4  -9  -6   31.90   13.20
   9  -4   6   39.40    6.90
   9  -5  -6   15.90   10.20
  -5  -9  -6   23.00   12.40
   9  -5   6   27.70    6.20
   9  -6  -6   17.60   10.60
  -6  -9  -6   36.10   13.40
   9  -6   6   17.00    5.40
   9  -7  -6    7.30   10.00
  -7  -9  -6   15.60   12.20
   9  -8  -6   -8.00    8.50
  -8  -9  -6   -5.10   10.70
   9  -9  -6  -13.60    8.80
   9   9   6    6.20    7.30
   9 -10  -6   34.10   11.90
  10   9   6    9.90    8.30
   8 -10  -6   60.49   14.20
  10   8   6   67.99   12.00
   7 -10  -6    0.40    9.30
  10   7   6    0.70    7.30
   6 -10  -6    8.20    9.80
  10   6   6    5.70    7.50
  10   5  -6   27.50    9.60
   5 -10  -6    2.80    9.60
  10   5   6    0.00    6.70
  10   4  -6  143.99   17.60
   4 -10  -6   68.09   15.40
  10   4   6   88.89   13.10
  10   3  -6   12.80    8.60
   3 -10  -6   -6.20   10.20
  10   3   6    5.70    6.80
   2 -10  -6   95.39   18.30
  10   2  -6  130.29   18.60
  10   2   6  156.78   16.50
   1 -10  -6   -7.00    9.30
  10   1  -6    3.30    8.40
  10   1   6    8.20    6.80
  10   0  -6   18.20    9.50
   0 -10  -6   12.50   11.50
  10   0   6   23.80    7.60
  -1 -10  -6    6.40   10.90
  10  -1  -6   -4.80    8.00
  10  -1   6    3.40    6.00
  10  -2  -6    1.10    9.00
  -2 -10  -6  -10.60   10.00
  10  -2   6    6.00    5.80
  10  -3  -6    7.70   10.40
  -3 -10  -6   88.59   15.20
  10  -3   6   32.70    7.10
  -4 -10  -6   14.10   12.00
  10  -4  -6   10.80   10.00
  10  -4   6   13.00    5.70
  -5 -10  -6   23.40   12.40
  10  -5  -6    2.80    9.10
  10  -5   6    1.60    4.70
  -6 -10  -6    0.40   11.30
  10  -6  -6    5.00    9.10
  10  -6   6   -0.60    4.20
  -7 -10  -6   18.80   12.50
  10  -7  -6    7.80   10.00
  -8 -10  -6    3.50   11.50
  10  -8  -6    9.60   10.00
  10  -9  -6   15.60   11.10
   9  10   6   17.10    9.20
  10 -10  -6   16.40   11.70
  10  10   6   31.00   10.20
  10 -11  -6    3.40   10.30
  11  10   6   -5.10    7.20
   9 -11  -6    0.10    9.60
  11   9   6    1.00    7.90
   8 -11  -6   22.00   11.40
  11   8   6   12.70    8.50
   7 -11  -6   19.30   11.00
  11   7   6   17.00    8.60
   6 -11  -6   25.10   11.50
  11   6   6   35.40    9.50
  11   5  -6   35.10   10.30
   5 -11  -6   24.00   11.60
  11   5   6   19.10    8.40
   4 -11  -6   12.00   10.70
  11   4  -6   17.50    8.80
  11   4   6   12.20    7.50
  11   3  -6    3.00    8.20
   3 -11  -6   12.40   10.40
  11   3   6    6.90    7.10
  11   2  -6   12.70    8.90
   2 -11  -6   15.00   10.70
  11   2   6    8.20    7.30
  11   1  -6    0.50    8.60
   1 -11  -6   17.50   10.70
  11   1   6    8.00    6.80
   0 -11  -6   36.50   13.00
  11   0  -6   23.50   10.70
  11   0   6   25.20    8.00
  11  -1  -6   -0.70    8.30
  -1 -11  -6   47.20   12.90
  11  -1   6    3.80    6.10
  11  -2  -6   -0.90    8.70
  -2 -11  -6   28.50   11.90
  11  -2   6    8.10    6.30
  11  -3  -6    8.90    9.90
  -3 -11  -6   34.70   12.70
  11  -3   6    3.20    5.70
  11  -4  -6   -1.80    8.70
  -4 -11  -6   13.70   11.60
  11  -4   6    6.40    5.40
  11  -5  -6    4.50    9.40
  -5 -11  -6   -6.50   10.70
  11  -5   6   -3.50    4.70
  -6 -11  -6   17.90   13.50
  11  -6  -6   23.30   10.80
  11  -6   6   12.60    5.80
  11  -7  -6    1.70    9.30
  -7 -11  -6   -2.60   11.90
  11  -8  -6   19.70   10.50
  -8 -11  -6   23.70   13.20
  11  -9  -6    5.70   10.00
   9  11   6    5.60    8.40
  11 -10  -6    8.50   11.10
  10  11   6   -3.80    7.60
  11 -11  -6    1.20   10.30
  11  11   6   -2.80    7.80
  11 -12  -6   -3.80   10.40
  12  11   6   -2.30    7.40
  10 -12  -6   16.10   11.20
  12  10   6   -0.30    7.70
   9 -12  -6   14.20   11.50
  12   9   6   22.60    9.30
   8 -12  -6   -0.80    9.90
  12   8   6   -0.70    7.20
   7 -12  -6    2.30   10.10
  12   7   6    4.50    7.40
   6 -12  -6  -12.40    9.10
  12   6   6   -2.10    6.80
  12   5  -6   23.20    9.40
   5 -12  -6   10.30   10.80
  12   5   6   10.60    7.50
  12   4  -6   22.70    9.70
   4 -12  -6    7.10   10.60
  12   4   6    8.90    7.50
  12   3  -6   28.80   10.50
   3 -12  -6   26.80   12.10
  12   3   6   26.90    8.70
   2 -12  -6   53.39   14.20
  12   2  -6   68.19   13.90
  12   2   6   77.39   11.90
   1 -12  -6   11.60   10.70
  12   1  -6   12.70    9.60
  12   1   6    1.90    6.90
   0 -12  -6    2.10   10.30
  12   0  -6    1.80    8.50
  12   0   6    7.20    6.70
  -1 -12  -6   15.00   11.20
  12  -1  -6   16.40   10.60
  12  -1   6    8.80    6.50
  -2 -12  -6  121.29   19.40
  12  -2  -6  112.69   18.30
  12  -2   6  163.38   15.60
  12  -3  -6   14.20   10.10
  -3 -12  -6   36.80   13.10
  12  -3   6    1.40    5.60
  12  -4  -6   51.99   13.30
  -4 -12  -6   65.49   15.60
  12  -4   6   54.09    8.90
  12  -5  -6   -7.00    9.20
  -5 -12  -6   16.00   12.60
  12  -5   6    2.50    5.10
  -6 -12  -6   12.50   12.40
  12  -6  -6   15.80   10.60
  12  -6   6   19.50    8.30
  -7 -12  -6   -2.00   10.90
  12  -7  -6   -5.60    9.20
  12  -8  -6   41.20   12.90
  12  -9  -6   -1.80   10.10
   9  12   6   13.80    9.10
  12 -10  -6   -1.60   10.30
  10  12   6   -0.30    8.30
  12 -11  -6   -2.60   10.10
  11  12   6   -9.10    7.60
  12 -12  -6   -5.30   10.70
  12  12   6    7.00    8.40
  11 -13  -6    1.80   10.20
  13  11   6   -2.60    7.50
  10 -13  -6   14.30   11.80
  13  10   6    5.80    7.90
   9 -13  -6   -4.90    9.90
  13   9   6   -7.70    6.80
   8 -13  -6    0.40   10.50
  13   8   6   -2.00    7.10
   7 -13  -6  -13.40   10.10
  13   7   6    3.30    7.40
   6 -13  -6   -2.20   10.50
  13   6   6   -8.30    7.00
  13   5  -6    9.60    8.20
   5 -13  -6   -6.50    9.60
  13   5   6    2.30    7.20
   4 -13  -6   -0.30    9.80
  13   4  -6   -1.30    7.90
  13   4   6   -1.30    6.60
  13   3  -6   -1.70    8.50
   3 -13  -6   -1.50    9.50
  13   3   6   -0.50    6.80
   2 -13  -6    8.20   10.30
  13   2  -6   13.80   10.00
  13   2   6    7.10    7.50
  13   1  -6   20.80   10.40
   1 -13  -6   11.60   11.30
  13   1   6    9.20    7.50
  13   0  -6   -5.50    8.60
   0 -13  -6   17.80   11.40
  13   0   6    2.70    6.90
  13  -1  -6   -6.90    8.80
  -1 -13  -6   -2.80    9.70
  13  -1   6   -1.60    6.10
  13  -2  -6    5.00    9.10
  -2 -13  -6    9.20   11.40
  13  -2   6    4.10    6.30
  13  -3  -6   12.80   10.00
  -3 -13  -6   19.20   12.50
  13  -3   6    5.60    6.20
  -4 -13  -6   48.20   14.70
  13  -4  -6   35.80   12.10
  13  -4   6   45.80    8.40
  -5 -13  -6   14.80   12.40
  13  -5  -6    9.10   10.40
  13  -5   6   25.10    6.70
  -6 -13  -6   18.20   13.30
  13  -6  -6   31.70   12.90
  13  -7  -6    4.00   11.20
  -7 -13  -6    2.50   12.00
  13  -8  -6   -9.40    9.70
  13  -9  -6  -15.40    9.60
   9  13   6    0.10    7.90
  13 -10  -6    1.50   10.80
  10  13   6    9.60    9.10
  13 -11  -6   -2.90   10.30
  11  13   6    0.70    8.20
  10 -14  -6   41.30   14.00
  14  10   6   27.70    9.80
   9 -14  -6   -7.30    9.70
  14   9   6    4.20    7.30
   8 -14  -6   -6.40   10.20
  14   8   6    2.10    7.50
   7 -14  -6   12.50   12.00
  14   7   6    2.10    7.50
   6 -14  -6   -0.80   10.80
  14   6   6    2.20    7.40
  14   5  -6   -1.50    7.50
   5 -14  -6   -7.60   10.80
  14   5   6    0.00    7.00
  14   4  -6    6.50    9.00
   4 -14  -6   16.90   12.40
  14   4   6   23.10    8.30
   3 -14  -6    0.80   11.30
  14   3  -6   17.40   10.20
  14   3   6    8.20    7.90
   2 -14  -6    6.40   11.00
  14   2  -6   -3.00    8.50
  14   2   6   -2.30    7.00
   1 -14  -6   -4.00   10.40
  14   1  -6   -5.10    8.60
  14   1   6   -8.90    6.00
   0 -14  -6   -8.20    9.90
  14   0  -6  -13.00    8.20
  14   0   6    1.30    6.70
  14  -1  -6   17.30   10.50
  -1 -14  -6   19.10   12.10
  14  -1   6   14.20    7.60
  14  -2  -6   11.80   10.10
  -2 -14  -6   20.50   13.10
  14  -2   6   28.40    8.00
  14  -3  -6   14.10   10.80
  -3 -14  -6   26.70   13.60
  14  -3   6   15.30    7.20
  -4 -14  -6   -6.50   11.00
  14  -4  -6   -6.60    8.80
  14  -4   6    9.80    6.50
  14  -5  -6    4.40   10.30
  -5 -14  -6   -2.70   12.10
  14  -5   6   -5.20    5.00
  14  -6  -6   20.60   11.90
  -6 -14  -6   14.10   13.00
  -7 -14  -6   -4.00   12.20
  14  -7  -6    8.10   11.40
  14  -8  -6   30.20   13.10
   8  14   6   54.59   12.10
  14  -9  -6   -8.70   10.10
   9  14   6    9.90    8.80
  14 -10  -6    3.10   11.40
  10  14   6    0.10    8.60
   9 -15  -6    0.20   10.30
  15   9   6    3.10    7.60
   8 -15  -6    9.00   12.10
  15   8   6   15.90    8.40
   7 -15  -6   -2.00   10.90
  15   7   6   14.70    8.00
   6 -15  -6    5.20   11.30
  15   6   6   12.50    8.00
   5 -15  -6    2.30   11.40
  15   5  -6   -8.80    8.30
  15   5   6    5.30    7.30
   4 -15  -6   11.80   11.60
  15   4  -6   -9.90    8.00
  15   4   6    2.70    7.20
   3 -15  -6   -1.00   10.40
  15   3  -6   -2.00    9.10
  15   3   6    0.80    6.50
  15   2  -6   -5.80    8.90
   2 -15  -6    7.50   11.00
  15   2   6    1.80    7.00
   1 -15  -6   12.80   11.60
  15   1  -6   10.20   10.40
  15   1   6   -5.70    6.40
   0 -15  -6   -2.40   10.30
  15   0  -6   -2.10    9.70
  15   0   6    4.00    7.30
  15  -1  -6   -2.20    9.30
  -1 -15  -6    4.10   11.00
  15  -1   6   -7.10    6.40
  -2 -15  -6    1.70   11.70
  15  -2  -6   -5.70    9.50
  15  -2   6    5.80    7.20
  15  -3  -6   16.80   11.40
  -3 -15  -6   19.10   13.00
  15  -3   6    2.20    6.60
  15  -4  -6    0.70    9.90
  -4 -15  -6   -4.40   11.80
  15  -4   6   -5.00    5.70
  -5 -15  -6    6.70   12.30
  15  -5  -6    9.70   11.40
  15  -5   6    4.40    5.90
  -6 -15  -6   11.80   13.20
  15  -6  -6    1.00   10.90
  -7 -15  -6   -1.60   11.70
  15  -7  -6    1.60   10.80
  15  -8  -6    7.30   12.20
   8  15   6   17.10    9.40
  15  -9  -6   -2.00   11.40
   9  15   6   15.90    9.30
   7 -16  -6   -1.70    9.80
  16   7   6    1.40    7.30
   6 -16  -6    9.30   11.20
  16   6   6    8.30    7.60
  16   5  -6  -20.10    9.80
   5 -16  -6    9.00   11.70
  16   5   6   12.30    7.90
   4 -16  -6   19.90   12.90
  16   4  -6    4.00   10.10
  16   4   6   31.80    9.20
  16   3  -6   -5.60    9.50
   3 -16  -6    2.50   11.10
  16   3   6   -0.60    7.00
  16   2  -6   -7.10    9.30
   2 -16  -6   16.10   12.20
  16   2   6    7.40    7.80
  16   1  -6   -9.30    9.30
   1 -16  -6    4.80   11.50
  16   1   6   -2.90    6.60
   0 -16  -6    8.40   11.90
  16   0  -6   16.70   11.40
  16   0   6   32.40    8.90
  16  -1  -6   10.50   10.60
  -1 -16  -6    5.60   12.40
  16  -1   6   -9.30    6.40
  -2 -16  -6   23.80   14.10
  16  -2  -6    9.80   11.50
  16  -2   6   12.20    7.70
  -3 -16  -6   -1.90   12.00
  16  -3  -6   15.20   11.40
  16  -3   6   14.30    7.50
  -4 -16  -6    0.40   12.30
  16  -4  -6   -3.80   10.80
  16  -4   6   -1.20    5.80
  16  -5  -6    0.50   11.00
  -5 -16  -6   -0.10   12.80
  16  -5   6   -5.30    5.60
  -6 -16  -6   -1.50   12.20
  16  -6  -6  -11.70   10.00
  16  -7  -6   -4.40   10.40
   4 -17  -6   31.40   13.30
  17   4  -6    0.10   10.20
  17   4   6    2.40    7.70
   3 -17  -6   18.80   12.10
  17   3  -6    1.20   10.60
  17   3   6    4.10    7.60
   2 -17  -6   26.80   12.60
  17   2  -6    4.20   11.10
  17   2   6    6.80    7.60
  17   1  -6   -6.90    9.60
   1 -17  -6   17.10   12.60
  17   1   6    4.20    7.80
  17   0  -6   -8.00    9.70
   0 -17  -6   11.60   12.30
  17   0   6    0.80    7.10
  -1 -17  -6    0.40   12.10
  17  -1  -6    5.20   11.00
  17  -1   6   17.10    8.00
  -2 -17  -6   18.60   13.40
  17  -2  -6    5.10   11.20
  17  -2   6    4.90    7.10
  17  -3  -6    6.80   10.90
  -3 -17  -6   17.50   12.70
  17  -3   6    5.70    6.80
  17  -4  -6   13.50   12.70
  -4 -17  -6    4.50   11.90
  17  -4   6   12.20    6.90
   0   0  -7   28.00   11.60
  -1   0  -7    8.00   11.00
   1   0  -7    9.70   10.50
   0   1  -7   19.40   11.10
   0  -1  -7   25.50   11.30
  -1  -1  -7  224.48   25.90
  -1   1  -7  202.68   25.60
   1  -1  -7  218.08   24.60
  -2  -1  -7   49.70   14.10
   1  -2  -7   48.30   11.70
   2   1  -7   50.49   12.30
  -1   2  -7   40.50   13.70
   0   2  -7   31.60   12.30
  -2   0  -7    7.70   12.00
   2   0  -7   41.20   11.30
   0  -2  -7   21.60   10.50
   1   2  -7   40.60   12.20
  -2   1  -7   -0.40   11.60
   2  -1  -7   24.90   10.80
  -1  -2  -7   37.10   11.80
   2  -2  -7   12.70    9.30
  -2  -2  -7    5.10   10.40
   2   2  -7   10.60   10.30
  -2   2  -7    8.70   11.50
  -2   3  -7   46.60   13.20
  -3  -2  -7   10.10   11.00
   3   2  -7   13.20    9.70
   2  -3  -7    5.20    9.60
  -3  -1  -7   15.60   12.30
   1  -3  -7   23.00   10.90
   3   1  -7   27.10   10.50
  -1   3  -7   34.40   13.00
  -3   0  -7    7.40   12.00
   0  -3  -7   17.20   10.80
   0   3  -7   63.99   13.50
   3   0  -7   28.80   10.70
  -1  -3  -7   13.10   10.90
   1   3  -7   11.10   10.80
   3  -1  -7   16.70   10.20
  -3   1  -7   16.80   12.20
  -3   2  -7    6.50   11.90
  -2  -3  -7   -1.10   10.20
   2   3  -7   25.60   10.90
   3  -2  -7    7.10    9.30
  -3  -3  -7   17.40   11.60
  -3   3  -7   15.90   12.80
   3   3  -7    8.90    9.70
   3  -3  -7   23.20   10.80
  -3   4  -7   30.30   13.10
   4   3  -7   19.10   10.40
   3  -4  -7   16.70   10.60
  -4  -3  -7   38.00   13.50
   2  -4  -7   10.80    9.90
  -4  -2  -7   24.70   12.00
   4   2  -7    4.90    9.40
  -2   4  -7   30.70   12.50
  -4  -1  -7   18.10   12.60
   4   1  -7    8.40    9.90
   1  -4  -7   17.50   10.60
  -1   4  -7   19.40   12.00
   0  -4  -7    8.90   10.30
  -4   0  -7    8.40   12.20
   0   4  -7   25.60   12.10
   4   0  -7    5.60    9.60
  -1  -4  -7   -0.20    9.50
   1   4  -7    9.10   10.90
  -4   1  -7   13.40   12.80
   4  -1  -7   15.90    9.90
   4  -2  -7   -0.20    9.10
   2   4  -7   10.20   11.00
  -4   2  -7    8.90   12.80
  -2  -4  -7   19.10   11.30
  -4   3  -7    8.00   13.50
   4  -3  -7   23.30   10.50
  -3  -4  -7   11.70   12.10
   3   4  -7   39.50   11.40
   4  -4  -7   10.10   10.10
   4   4  -7   20.90    9.90
  -4  -4  -7   -6.50   10.60
  -5  -4  -7   15.90   12.20
   5   4  -7   28.70   11.00
   4  -5  -7   21.40   11.00
   5   3  -7   98.89   16.50
  -5  -3  -7  113.79   19.40
   3  -5  -7  147.49   20.30
   2  -5  -7   16.40   10.70
   5   2  -7   13.40   10.00
  -5  -2  -7    3.70   11.40
   1  -5  -7  167.78   22.20
  -5  -1  -7  133.59   21.40
   5   1  -7  169.68   20.80
  -5   0  -7   31.10   14.20
   0  -5  -7   12.90   11.00
   5   0  -7   13.70   10.00
   5  -1  -7   18.20   10.40
  -5   1  -7   -2.60   13.40
  -1  -5  -7   61.79   12.90
   5  -2  -7   -7.80    8.60
  -2  -5  -7    5.70   11.00
  -5   2  -7    6.50   14.80
   5  -3  -7   33.40   11.20
  -3  -5  -7   18.50   12.70
  -4  -5  -7    0.60   11.10
   5  -4  -7    4.90    9.50
   5  -4   7    0.50    5.20
   5  -5  -7    7.30    9.50
  -5  -5  -7   -2.50   11.10
  -6  -5  -7   -0.90   11.50
   5  -6  -7    0.60    9.10
   4  -6  -7    0.70    9.30
   6   4  -7    4.10    9.50
  -6  -4  -7    7.40   11.80
   6   3  -7    9.60    9.40
   3  -6  -7    0.80    9.00
  -6  -3  -7   -1.80   11.40
   2  -6  -7    6.90   10.10
   6   2  -7    8.80    9.60
  -6  -2  -7   12.10   12.60
  -6  -1  -7   -4.80   12.20
   6   1  -7   10.20    8.90
   1  -6  -7   42.50   12.10
   6   0  -7    6.70    9.40
  -6   0  -7    6.30   13.50
   0  -6  -7    9.70   10.90
  -1  -6  -7   -1.40   10.10
   6  -1  -7    8.90    9.00
  -2  -6  -7    9.80   11.60
   6  -2  -7   27.90   10.00
   6  -2   7   -4.70    6.00
   6  -3  -7    6.50    9.10
  -3  -6  -7   -7.20   10.50
   6  -3   7   -5.90    5.30
   6  -4  -7    1.40    8.80
  -4  -6  -7   13.80   12.00
   6  -4   7   -0.30    5.40
   6  -5  -7   16.60   10.10
  -5  -6  -7    7.20   11.10
  -6  -6  -7    2.60   11.30
   6  -6  -7   -0.40    8.70
  -7  -6  -7   19.20   12.40
   6  -7  -7    6.20   10.00
  -7  -5  -7    2.00   11.80
   5  -7  -7    4.70   10.00
   4  -7  -7   -8.00    9.80
  -7  -4  -7   11.40   11.70
   7   4  -7   10.00   10.30
  -7  -3  -7  -13.50   11.20
   3  -7  -7   -6.10    9.50
   7   3  -7   11.00    9.40
   2  -7  -7    1.10    9.90
   7   2  -7   18.40   10.10
   1  -7  -7   25.80   11.70
   7   1  -7   18.50    9.80
   7   1   7   12.50    8.00
   7   0  -7    8.50    9.40
   0  -7  -7   -1.90   10.30
   7   0   7    3.90    7.00
  -1  -7  -7   -2.00   10.00
   7  -1  -7    2.60    8.80
   7  -1   7    1.70    6.70
  -2  -7  -7   12.80   12.10
   7  -2  -7   23.90   10.50
   7  -2   7   13.10    7.10
  -3  -7  -7   52.99   15.20
   7  -3  -7   44.10   12.60
   7  -3   7   72.99   10.40
   7  -4  -7    8.50    9.20
  -4  -7  -7  -11.30   10.80
   7  -4   7    4.40    5.40
  -5  -7  -7   46.30   14.90
   7  -5  -7   66.09   14.10
   7  -6  -7   24.90   10.80
  -6  -7  -7    3.00   11.40
  -7  -7  -7   22.70   13.50
   7  -7  -7   10.00   10.00
   7  -8  -7   -0.30    9.30
   6  -8  -7    5.10    9.60
   5  -8  -7   -2.00    9.00
   4  -8  -7   13.70   10.30
   8   4  -7    7.90    9.90
   8   4   7    1.80    7.80
   3  -8  -7    3.20    9.90
   8   3  -7   21.20   10.60
   8   3   7    4.00    7.50
   2  -8  -7   -5.60    9.60
   8   2  -7   18.00   10.00
   8   2   7    4.70    7.70
   8   1  -7   15.60    9.80
   1  -8  -7    2.30   10.20
   8   1   7    4.20    7.30
   0  -8  -7    8.70   11.20
   8   0  -7   -6.30    8.00
   8   0   7   -7.10    6.60
  -1  -8  -7   -1.30   10.10
   8  -1  -7   13.80   10.00
   8  -1   7   -7.60    6.30
  -2  -8  -7   -0.80   10.70
   8  -2  -7    9.10    9.30
   8  -2   7   -3.30    5.90
  -3  -8  -7    0.80   10.80
   8  -3  -7   14.40   10.10
   8  -3   7   10.40    6.60
  -4  -8  -7    5.00   11.30
   8  -4  -7    4.20    9.40
   8  -4   7    0.50    5.20
  -5  -8  -7    9.80   11.90
   8  -5  -7   20.20   11.00
  -6  -8  -7   -3.70   11.70
   8  -6  -7    6.70    9.50
  -7  -8  -7    9.90   12.20
   8  -7  -7    1.00    9.40
   8  -8  -7    0.50    9.10
  -8  -8  -7   15.50   13.00
   8  -9  -7   -0.80    9.50
   9   8   7   26.50    9.70
   7  -9  -7   48.40   14.30
   9   7   7   61.29   12.60
   6  -9  -7   10.20   10.40
   9   6   7   13.00    9.00
   5  -9  -7   17.90   11.50
   9   5   7   13.20    8.80
   4  -9  -7    4.10   10.40
   9   4  -7   17.80   11.10
   9   4   7    4.70    8.10
   3  -9  -7   58.99   15.50
   9   3  -7  105.39   16.70
   9   3   7  123.19   16.50
   9   2  -7   -4.10    9.00
   2  -9  -7    1.90   10.30
   9   2   7   12.40    8.40
   9   1  -7   20.20   11.00
   1  -9  -7   12.20   11.70
   9   1   7   29.00    9.10
   9   0  -7   -7.80    8.70
   0  -9  -7   18.90   11.60
   9   0   7   -2.40    6.60
  -1  -9  -7   12.00   11.40
   9  -1  -7   -4.90    8.60
   9  -1   7    6.20    7.00
   9  -2  -7  -11.20    8.00
  -2  -9  -7   28.80   12.90
   9  -2   7   -0.70    6.50
  -3  -9  -7    3.20   11.80
   9  -3  -7   -3.30    9.80
   9  -3   7    1.50    6.10
   9  -4  -7    9.20   10.30
  -4  -9  -7    0.20   11.20
   9  -4   7   -2.30    5.40
   9  -5  -7    9.60   10.20
  -5  -9  -7    2.90   11.40
  -6  -9  -7   -8.30   10.70
   9  -6  -7    7.50   10.00
  -7  -9  -7   29.50   14.60
   9  -7  -7    6.80   10.40
   9  -8  -7    9.20   10.50
  -8  -9  -7    4.90   12.50
   9  -9  -7   25.40   12.50
   9   9   7   50.59   11.90
   9 -10  -7    8.00   11.10
  10   9   7   -6.00    7.90
   8 -10  -7   -1.00   10.20
  10   8   7    6.00    8.50
   7 -10  -7   -6.60    9.10
  10   7   7   -0.80    8.20
   6 -10  -7   -9.20    9.50
  10   6   7    7.40    8.60
   5 -10  -7   -8.60    9.60
  10   5   7   -2.30    7.90
   4 -10  -7    3.50   10.60
  10   4  -7   26.10   11.90
  10   4   7    8.60    8.80
  10   3  -7   15.20    9.60
   3 -10  -7    3.60   10.50
  10   3   7   12.40    8.40
   2 -10  -7    2.10    9.90
  10   2  -7   10.20    9.20
  10   2   7    5.80    7.90
   1 -10  -7    5.30   10.40
  10   1  -7   -2.60    8.50
  10   1   7    8.50    8.10
  10   0  -7   -1.30    8.90
   0 -10  -7   16.40   11.40
  10   0   7    0.20    7.20
  -1 -10  -7   12.50   11.20
  10  -1  -7    2.10    9.00
  10  -1   7    1.10    6.80
  10  -2  -7  -13.50    8.00
  -2 -10  -7   26.10   12.00
  10  -2   7   15.40    7.60
  -3 -10  -7    7.30   11.70
  10  -3  -7   -7.30    9.20
  10  -3   7    7.90    6.60
  -4 -10  -7    7.20   12.00
  10  -4  -7   -0.90    9.50
  10  -4   7    1.30    5.60
  10  -5  -7    0.40   10.00
  -5 -10  -7   12.60   12.80
  -6 -10  -7   10.30   12.40
  10  -6  -7   -2.90    9.60
  -7 -10  -7   11.60   12.80
  10  -7  -7   13.30   10.80
  10  -8  -7    9.60   10.70
  -8 -10  -7   -5.60   12.00
  10  -9  -7   11.30   11.80
   9  10   7   14.20    9.40
  10 -10  -7   -1.80   10.40
  10  10   7    0.10    9.00
  10 -11  -7    9.50   11.00
  11  10   7  -11.00    8.20
   9 -11  -7    9.20   10.90
  11   9   7    1.40    8.50
   8 -11  -7    3.80   10.50
  11   8   7   -9.90    7.90
   7 -11  -7   23.40   11.60
  11   7   7   10.00    9.20
   6 -11  -7   -4.80   10.30
  11   6   7    0.90    8.30
   5 -11  -7    3.40   10.80
  11   5   7    1.30    7.80
  11   4  -7   43.10   19.10
   4 -11  -7   11.70   11.10
  11   4   7   24.40    9.90
   3 -11  -7   96.69   18.00
  11   3  -7   99.09   16.80
  11   3   7  116.09   15.90
   2 -11  -7   11.70   11.00
  11   2  -7   13.00    9.70
  11   2   7    1.90    7.70
   1 -11  -7   10.60   11.50
  11   1  -7   30.00   11.20
  11   1   7   30.20    9.70
   0 -11  -7    9.70   11.20
  11   0  -7    2.70    9.20
  11   0   7   14.90    8.30
  11  -1  -7   18.00   11.10
  -1 -11  -7   44.40   14.10
  11  -1   7   45.30    9.90
  11  -2  -7   10.70   10.30
  -2 -11  -7   23.90   12.00
  11  -2   7    2.10    6.60
  11  -3  -7   63.59   14.90
  -3 -11  -7   84.09   17.20
  11  -3   7   65.69   10.80
  11  -4  -7    2.40   10.30
  -4 -11  -7   12.50   11.70
  11  -4   7   -1.70    5.80
  11  -5  -7    5.10   10.20
  -5 -11  -7   11.30   12.50
  11  -6  -7  -11.70    9.30
  -6 -11  -7    1.00   11.90
  -7 -11  -7   17.00   12.90
  11  -7  -7   23.60   12.30
  11  -8  -7   -4.90   10.40
  11  -9  -7    6.70   11.30
   9  11   7   -1.40    8.40
  11 -10  -7    3.40   10.80
  10  11   7   -9.70    8.00
   9 -12  -7   10.30   11.20
  12   9   7   -2.00    8.50
   8 -12  -7    8.90   10.70
  12   8   7   10.60    9.00
   7 -12  -7    1.10   10.70
  12   7   7   -6.20    7.80
   6 -12  -7  -13.40    9.40
  12   6   7   -0.60    8.20
   5 -12  -7   -2.10   10.90
  12   5   7   -3.90    7.80
   4 -12  -7   -8.50   10.00
  12   4   7    8.40    8.10
   3 -12  -7   -4.50   10.40
  12   3  -7   23.30   10.30
  12   3   7    6.80    8.40
  12   2  -7   14.20    9.90
   2 -12  -7    9.50   11.50
  12   2   7    6.40    8.00
  12   1  -7    1.50    9.60
   1 -12  -7    0.90   10.90
  12   1   7   -7.10    7.60
  12   0  -7    5.30    9.70
   0 -12  -7   -2.40   11.10
  12   0   7    1.80    7.60
  12  -1  -7    3.40    9.50
  -1 -12  -7   -5.00   11.00
  12  -1   7    0.80    7.10
  -2 -12  -7   -4.00   11.10
  12  -2  -7   13.80   10.70
  12  -2   7    6.30    7.00
  12  -3  -7    0.50    9.60
  -3 -12  -7   -5.20   11.70
  12  -3   7    3.50    6.60
  -4 -12  -7    9.90   13.00
  12  -4  -7    5.50   10.70
  12  -4   7    5.10    6.70
  -5 -12  -7   -6.70   11.70
  12  -5  -7   -1.00    9.60
  12  -6  -7    2.70   10.30
  -6 -12  -7    9.20   12.50
  -7 -12  -7    2.40   12.30
  12  -7  -7    0.10   10.50
  12  -8  -7   -8.30   10.40
  12  -9  -7    2.10   11.30
   9  12   7    9.00    9.60
   7 -13  -7   -7.20   10.10
  13   7   7   -7.90    8.00
   6 -13  -7    5.40   10.60
  13   6   7    1.20    7.90
   5 -13  -7    3.90   11.10
  13   5   7    6.80    8.40
   4 -13  -7   12.70   11.30
  13   4   7    3.60    7.80
  13   3  -7   -1.20    8.80
   3 -13  -7   -1.80   10.70
  13   3   7   -1.00    7.80
   2 -13  -7   33.40   13.00
  13   2  -7    5.40    9.70
  13   2   7   -6.50    7.30
   1 -13  -7  -10.70   10.20
  13   1  -7    1.60    9.40
  13   1   7   -5.40    7.60
  13   0  -7   -3.70    9.70
   0 -13  -7    5.00   11.70
  13   0   7   12.20    8.80
  13  -1  -7   26.60   12.50
  -1 -13  -7   33.60   14.00
  13  -1   7   38.80   10.10
  -2 -13  -7    0.70   12.00
  13  -2  -7    7.70   10.70
  13  -2   7   -0.50    6.60
  13  -3  -7   28.10   13.00
  -3 -13  -7   34.50   14.90
  13  -3   7   41.10    9.30
  -4 -13  -7    2.90   12.70
  13  -4  -7   -3.50    9.80
  13  -4   7   -9.50    7.80
  -5 -13  -7   -7.10   11.90
  13  -5  -7    4.20   10.50
  -6 -13  -7    1.10   12.10
  13  -6  -7    6.50   11.50
  13  -7  -7   21.70   12.30
  -7 -13  -7   35.00   15.50
   5 -14  -7   -9.50   10.40
  14   5   7    5.70    8.40
   4 -14  -7   -8.60   10.50
  14   4   7   -2.40    7.70
  14   3  -7    3.80   10.00
   3 -14  -7    9.90   12.20
  14   3   7    6.10    8.30
   2 -14  -7   -8.80   10.60
  14   2  -7   -1.00    9.80
  14   2   7   -3.70    7.60
  14   1  -7    5.20   11.00
   1 -14  -7   -1.80   11.10
  14   1   7   -6.50    7.40
  14   0  -7   -2.40   10.60
   0 -14  -7   -5.10   11.10
  14   0   7   -4.70    7.00
  14  -1  -7    8.90   10.60
  -1 -14  -7   -4.60   11.50
  14  -1   7    5.60    7.60
  14  -2  -7   -1.30    9.90
  -2 -14  -7   -5.20   12.00
  14  -2   7   -1.10    6.90
  -3 -14  -7   -4.80   12.00
  14  -3  -7   -6.70   10.10
  14  -3   7   -0.50    7.00
  14  -4  -7    5.60   11.50
  -4 -14  -7   -2.30   11.70
  -5 -14  -7   -2.20   12.80
  14  -5  -7   -8.30   10.70
  15   2  -7    7.70   10.40
   2 -15  -7   -2.50   11.80
   1 -15  -7    1.40   11.90
  15   1  -7   -2.30   10.00
  15   1   7   -1.50    7.50
   0 -15  -7   -7.00   11.40
  15   0  -7   -8.70    9.70
  15   0   7   -1.60    7.30
  -1 -15  -7  -11.20   12.00
  15  -1  -7    1.50   11.00
  15  -1   7    3.30    7.70
  -2 -15  -7   10.00   13.60
  15  -2  -7   18.30   12.30
   0   0  -8  113.29   18.60
   0  -1  -8   12.50   11.20
  -1   0  -8   25.30   12.70
   1   0  -8   35.10   12.30
   0   1  -8   35.50   13.40
   1   1  -8   25.80   12.50
  -1   1  -8    8.00   11.90
   1  -1  -8   29.70   12.20
  -1  -1  -8   26.60   12.60
   2   1  -8   45.60   13.20
   1  -2  -8   29.10   12.10
  -1   2  -8   28.40   13.40
  -2  -1  -8   24.30   13.20
  -2   0  -8   38.90   14.40
   0  -2  -8   51.59   13.70
   0   2  -8   35.60   13.50
   2   0  -8   18.10   11.50
   1   2  -8   41.10   13.60
  -2   1  -8   28.60   13.40
   2  -1  -8   44.00   13.60
  -1  -2  -8   24.60   12.40
   2  -2  -8   13.20   10.60
  -2   2  -8   20.30   12.70
   2   2  -8   17.20   12.00
  -2  -2  -8   19.50   12.60
  -3  -2  -8   26.30   12.60
   2  -3  -8   16.00   11.20
   3   2  -8   16.40   11.20
   3   1  -8   13.90   10.30
  -3  -1  -8    7.90   11.50
   1  -3  -8   14.30   10.80
  -3   0  -8   26.40   12.90
   0  -3  -8   16.00   11.20
   3   0  -8   14.70   10.80
   3  -1  -8   12.80   10.60
  -3   1  -8   19.20   12.90
  -1  -3  -8   24.10   12.00
   3  -2  -8   29.60   10.50
  -3   2  -8   12.30   12.60
  -2  -3  -8   19.40   12.50
   3  -3  -8    9.30   10.30
  -3  -3  -8    6.60   12.30
  -4  -3  -8    8.20   12.10
   3  -4  -8   -0.60    9.80
   2  -4  -8   29.80   12.60
  -4  -2  -8   40.90   14.20
   4   2  -8   40.10   12.60
   1  -4  -8   13.70   11.40
  -4  -1  -8   27.50   13.60
   4   1  -8   11.40   10.20
   4   0  -8   38.80   12.60
   0  -4  -8   20.50   12.10
  -4   0  -8   21.60   13.20
  -1  -4  -8    4.00   11.10
   4  -1  -8   13.50   10.40
  -4   1  -8   29.40   14.00
   4  -2  -8    5.10    9.40
  -2  -4  -8  -11.90   10.90
  -4   2  -8   16.40   14.30
   4  -3  -8    4.70   10.00
  -3  -4  -8   -4.90   11.60
  -4  -4  -8    8.30   12.20
   4  -4  -8    3.90   10.70
   4  -5  -8    1.60   10.00
  -5  -4  -8    1.30   11.80
   3  -5  -8   -2.30    9.00
  -5  -3  -8   -2.60   11.70
  -5  -2  -8    6.40   13.00
   2  -5  -8    2.70   10.80
   5   2  -8   14.40   11.00
   5   1  -8   14.20   10.50
  -5  -1  -8    8.50   13.20
   1  -5  -8   20.20   11.50
   0  -5  -8   14.70   11.50
  -5   0  -8    3.90   13.40
   5   0  -8    6.70    9.90
   5  -1  -8   11.20    9.80
  -1  -5  -8    6.70   11.30
  -5   1  -8   18.80   14.40
  -2  -5  -8   -2.10   11.30
   5  -2  -8    3.30    9.40
  -3  -5  -8    6.40   11.90
   5  -3  -8    0.20    9.40
  -4  -5  -8   -2.30   11.20
   5  -4  -8   18.60   11.10
   5  -5  -8   -5.50    9.10
  -5  -5  -8   10.30   12.70
   5  -6  -8    6.60   10.20
  -6  -5  -8   -9.00   11.30
   4  -6  -8   12.50   10.70
  -6  -4  -8   -4.00   11.70
   3  -6  -8    7.70   10.40
  -6  -3  -8    8.60   12.90
   2  -6  -8   28.50   12.80
   6   2  -8   29.40   12.10
  -6  -2  -8   13.70   13.60
   1  -6  -8   12.70   11.30
  -6  -1  -8   -7.80   12.20
   6   1  -8   19.80   11.10
   6   0  -8   32.50   11.80
   0  -6  -8    6.00   11.00
   6  -1  -8   16.50   10.60
  -1  -6  -8    9.50   11.40
   6  -1   8    1.80    7.20
   6  -2  -8   15.60   10.50
  -2  -6  -8   10.10   11.90
   6  -2   8   11.30    7.60
  -3  -6  -8    6.60   12.30
   6  -3  -8   10.30   10.10
  -4  -6  -8    9.40   12.10
   6  -4  -8   22.70   11.50
  -5  -6  -8    1.70   12.10
   6  -5  -8   -8.90    9.30
  -6  -6  -8   -7.50   11.90
   6  -6  -8    4.00    9.90
   6  -7  -8    3.90    9.90
  -7  -6  -8   -4.00   12.10
   5  -7  -8    4.60    9.90
  -7  -5  -8   -5.90   12.00
   4  -7  -8    6.10    9.60
  -7  -4  -8  -19.40   10.20
   3  -7  -8    5.30    9.80
   7   2  -8   11.80   10.20
   2  -7  -8    6.00   10.40
   7   2   8    3.90    8.10
   1  -7  -8    1.20   10.10
   7   1  -8   14.80    9.90
   7   1   8   14.30    8.60
   7   0  -8    3.80    9.40
   0  -7  -8   11.20   10.90
   7   0   8    3.90    7.90
  -1  -7  -8    6.10   11.20
   7  -1  -8   15.20   10.30
   7  -1   8   -1.50    7.40
   7  -2  -8   12.70   10.30
  -2  -7  -8    6.40   11.80
   7  -2   8    4.00    7.60
  -3  -7  -8    1.40   11.30
   7  -3  -8    9.40    9.90
  -4  -7  -8    6.50   11.40
   7  -4  -8    2.40    9.70
  -5  -7  -8   -2.20   11.50
   7  -5  -8   -1.70    9.50
   7  -6  -8   14.00   11.00
  -6  -7  -8    1.10   12.10
   7  -7  -8   -3.70    9.70
  -7  -7  -8   -2.20   11.70
   7  -8  -8   16.90   11.30
   8   7   8    1.60    8.60
   6  -8  -8    3.80   10.30
   8   6   8   13.70    9.10
   5  -8  -8    6.70   10.50
   8   5   8    8.60    8.90
   4  -8  -8    5.70   10.40
   8   4   8   28.00   10.10
   3  -8  -8    8.20   10.60
   8   3   8   12.40    8.90
   2  -8  -8    0.10   10.40
   8   2  -8    7.80   10.10
   8   2   8   11.00    9.00
   8   1  -8   15.80   10.30
   1  -8  -8    5.70   11.20
   8   1   8    5.60    8.40
   0  -8  -8    0.80   10.60
   8   0  -8    4.60    9.00
   8   0   8  -10.70    7.20
  -1  -8  -8    2.20   11.20
   8  -1  -8   14.80   10.20
   8  -1   8   -7.40    7.10
  -2  -8  -8    1.80   11.60
   8  -2  -8    4.00    9.70
   8  -2   8    7.80    7.30
  -3  -8  -8    0.80   11.70
   8  -3  -8   -4.90    8.90
  -4  -8  -8   10.60   12.40
   8  -4  -8    2.70   10.00
  -5  -8  -8   14.90   13.70
   8  -5  -8    2.50    9.90
   8  -6  -8    1.30    9.90
  -6  -8  -8   -0.10   12.70
  -7  -8  -8    1.30   12.90
   8  -7  -8    1.50   10.00
   8  -8  -8   20.90   12.10
   8   8   8   32.90   11.00
   7  -9  -8   -8.40    9.50
   9   7   8   16.20   10.30
   6  -9  -8    1.20   10.50
   9   6   8   14.70    9.60
   5  -9  -8   -8.50    9.40
   9   5   8   -1.70    8.40
   4  -9  -8   -2.90   10.30
   9   4   8   16.10    9.70
   3  -9  -8   -0.90   10.00
   9   3   8    5.10    8.90
   2  -9  -8    2.90   11.00
   9   2  -8   23.90   11.20
   9   2   8    3.80    8.60
   9   1  -8   14.10   10.30
   1  -9  -8    0.20   10.50
   9   1   8   -1.40    8.00
   9   0  -8    4.30    9.40
   0  -9  -8    7.20   11.40
   9   0   8   -7.30    7.10
   9  -1  -8    2.10    9.70
  -1  -9  -8   16.30   12.60
   9  -1   8   -5.70    7.40
   9  -2  -8    3.60    9.90
  -2  -9  -8    3.40   11.50
   9  -2   8   -1.40    7.00
  -3  -9  -8    7.00   12.10
   9  -3  -8    8.80   10.20
  -4  -9  -8   -1.70   12.10
   9  -4  -8   -0.10    9.60
  -5  -9  -8    6.80   12.50
   9  -5  -8    6.80   11.00
   9  -6  -8   -9.40    8.90
  -6  -9  -8   -0.60   12.60
  -7  -9  -8   -3.60   12.10
   9  -7  -8   -3.30   10.40
   6 -10  -8    6.50   11.20
   5 -10  -8   15.20   12.20
  10   5   8   -8.10    8.30
   4 -10  -8    4.90   11.60
  10   4   8    9.80    9.60
   3 -10  -8   10.10   11.60
  10   3   8   12.00    9.50
   2 -10  -8   31.10   13.60
  10   2  -8   34.70   12.50
  10   2   8   49.40   11.70
   1 -10  -8    7.60   11.70
  10   1  -8   25.50   11.40
  10   1   8    8.20    9.20
  10   0  -8    2.20   10.10
   0 -10  -8   -6.80   10.60
  10   0   8   -2.70    7.90
  -1 -10  -8   -3.00   11.40
  10  -1  -8    9.70   10.90
  10  -1   8    8.50    8.50
  10  -2  -8    4.30   10.20
  -2 -10  -8   17.90   13.50
  10  -2   8    8.80    8.20
  -3 -10  -8    7.20   12.80
  10  -3  -8   13.30   10.60
  -4 -10  -8   14.60   13.60
  10  -4  -8    8.10   10.80
  -5 -10  -8   24.80   13.70
  10  -5  -8    1.40   10.50
  -6 -10  -8    6.70   13.30
  10  -6  -8    1.30   11.00
   4 -11  -8  -10.80    9.80
   3 -11  -8    4.70   11.40
  11   3   8    5.30    9.10
  11   2  -8   32.10   14.10
   2 -11  -8    5.90   11.30
  11   2   8    6.70    8.90
  11   1  -8    5.60    9.90
   1 -11  -8   -6.50   10.60
  11   1   8    1.70    8.50
  11   0  -8   14.80   10.50
   0 -11  -8    1.50   11.60
  11   0   8    9.80    9.00
  -1 -11  -8   13.70   12.80
  11  -1  -8   17.80   10.80
  11  -1   8   10.20    8.40
  -2 -11  -8    1.80   12.40
  11  -2  -8    5.40    9.90
  11  -2   8    1.40    7.40
  -3 -11  -8   -1.90   11.90
  11  -3  -8    9.00   10.40
  -4 -11  -8   11.40   12.90
  11  -4  -8   13.50   11.10
   0   0  -9    7.60   12.30
  -1   0  -9    8.80   12.40
   0  -1  -9   12.00   11.80
   1   0  -9   12.80   12.30
  -1  -1  -9    3.20   11.40
   1  -1  -9    5.10   11.30
   1  -2  -9    3.10   11.90
  -2  -1  -9    1.40   11.80
  -2   0  -9    2.40   11.90
   0  -2  -9   -6.10   11.40
   2   0  -9   12.20   11.30
   2  -1  -9    1.50   10.30
  -1  -2  -9   -4.20   11.60
   2  -2  -9    8.20   11.80
  -2  -2  -9   -1.60   11.70
  -3  -2  -9   -3.30   11.60
   2  -3  -9   -5.30   10.60
   1  -3  -9   -5.50   10.60
  -3  -1  -9    8.80   12.50
  -3   0  -9    9.60   12.30
   3   0  -9   23.80   12.60
   0  -3  -9   -1.00   11.90
  -1  -3  -9  -13.30   10.80
   3  -1  -9    3.40   10.90
   3  -2  -9    7.80   11.20
  -2  -3  -9    1.60   12.10
   3  -3  -9    1.20   10.80
  -3  -3  -9    0.70   12.40
  -4  -3  -9    2.90   12.40
   3  -4  -9   12.60   11.50
   2  -4  -9   -0.10   10.40
  -4  -2  -9   14.30   13.50
   1  -4  -9   12.40   11.80
  -4  -1  -9   11.60   13.00
   0  -4  -9   10.90   11.80
   4   0  -9    7.20   10.80
  -4   0  -9   13.30   13.60
  -1  -4  -9    1.60   11.30
   4  -1  -9    6.40   10.70
  -2  -4  -9    9.90   11.80
   4  -2  -9    5.30   10.90
   4  -3  -9    8.60   10.60
  -3  -4  -9    3.30   11.40
   4  -4  -9    2.00   10.50
  -4  -4  -9   -4.50   11.60
   3  -5  -9    4.90   11.20
  -5  -2  -9   10.00   13.80
   2  -5  -9   -3.10   10.20
   1  -5  -9    5.20   11.00
  -5  -1  -9   -0.60   12.80
   5   0  -9    7.10   10.50
   0  -5  -9    9.60   12.20
   5  -1  -9   10.00   10.80
  -1  -5  -9    9.20   12.60
  -2  -5  -9    3.70   11.80
   5  -2  -9    6.40   10.70
   5  -3  -9    0.60    9.90
  -3  -5  -9    8.70   12.40

_computing_structure_solution     'SHELXT 2014/4 (Sheldrick, 2014)'
;
_shelx_hkl_checksum                33286
_olex2_submission_special_instructions  'No special instructions were received'
